# Supplementary material for: A dichotomy of gene regulatory associations during the activated B-cell to plasmablast transition
Source: Life Sci Alliance. 2020 Aug 25;3(10):e202000654. doi: 10.26508/lsa.202000654 (PMC7471511; doi:10.26508/lsa.202000654)
Supplement: Supplementary file 1 [file LSA-2020-00654_TableS1.xlsx]

## Sheet: ModuleInfo_Total
Module	ModuleSize	ModuleStability	Colour(HEX)	EnrichedChromosomes	DepletedChromosomes	#	ModuleName
1	681	76.0646	#91b07d	Chr11q13 Chr16p11 Chr19q13 Chr1p36		1	UpD0 UpD6 Quiescence Vesicle SerumResponse
2	661	60.3631	#0ec90e			2	UpD0-D3.6h IRF4_Induced NFkB_Signalling
3	645	82.9457	#00ff00	Chr2q11		3	UpD0-D3.0h MYD88_INF ZincFinger
4	638	69.5925	#639fc7	Chr8q21 Chr5q12 Chr11q14	Chr19p13 Chr19q13 Chr3p21	4	UpD3-D5 MYC CellCycle Mitochondria MitocondrialRibosome
5	633	76.9352	#A020F0			5	UpD0 UpD6 PeptideChainElongation
6	632	65.1899	#c9c273	Chr3p22		6	UpD0 UpD6 ZincFinger
7	561	61.1408	#6ea6cc	Chrxq22		7	UpD3-D5 MYC CellCycle Mitochondria Ribosome
8	527	97.723	#8B864E			8	UpD5on PlasmaCell ER Golgi UPR_XBP1
9	521	82.5336	#e80e0e			9	UpD3-D5 Mitochondria RibosomeBiogenesis MYC CellCycle
10	509	84.6758	#0000cc	Chr2q12		10	UpD3-D4 RUNX1_NFKB_STAT5A InflammatoryResponse SterolBiosynthesis
11	505	62.3762	#abe810			11	UpD0 Bcell ZincFinger
12	424	85.8491	#706c3f			12	UpD5on PlasmaCell ER Golgi
13	417	92.5659	#0000FF	Chr5q13 Chr19p12		13	UpD0 UpD3.3h LU_EZH2_TARGETS_DN
14	399	89.2231	#00cc00			14	UpD3-D4 StemLike
15	372	93.2796	#7ec3f2	Chr16q13		15	UpD3.6h-D5 Metal-thiolate cluster CellCycle
16	355	81.4085	#87CEFF	Chr9q34 Chr19p13 Chr22q13 Chr16p11,13		16	UpD3.3h-D5 CellCycle
17	334	95.509	#8f8a50			17	UpD5on PlasmaCell ER Golgi XBP1
18	308	76.2987	#8A8A8A	Chr5q22		18	Novel1
19	122	37.7049	#154532			19	UpD3 AminoAcidDeprivation MTORC1 MM-CD-Subgroup
20	118	72.0339	#A1A1A1			20	Novel2

## Sheet: GeneData_Total
Module	ModuleName	Gene	GeneModularStability	D0_A	D0_B	D0_C	D3_A	D3_B	D3_C	D3.3_A	D3.3_B	D3.3_C	D3.6_A	D3.6_B	D3.6_C	D3.12_A	D3.12_B	D3.12_C	D4_A	D4_B	D4_C	D5_A	D5_B	D5_C	D6_A	D6_B	D6_C
1	M1 UpD0 UpD6 Quiescence Vesicle SerumResponse	ADAM17	100	10.8205	10.5153	10.6238	9.2588	9.51134	9.58194	9.81315	9.91009	9.78915	9.49804	9.51788	9.55985	9.43684	9.74806	9.79833	9.55209	9.96938	9.94752	9.65646	10.0718	9.88962	10.0431	10.2596	10.2245
1	M1 UpD0 UpD6 Quiescence Vesicle SerumResponse	APOBEC3D	100	10.0901	9.80677	9.9033	9.2742	9.71101	9.53807	9.56632	9.60596	9.59404	9.21804	9.35785	9.41915	9.01832	9.48205	9.56518	8.90777	9.74142	9.53156	9.14071	9.98938	9.57724	9.6008	9.88912	9.87712
1	M1 UpD0 UpD6 Quiescence Vesicle SerumResponse	ASCC2	100	12.264	12.1239	12.0803	11.1973	11.5901	11.2102	12.3741	12.0633	11.2698	11.4594	12.1717	11.6298	11.6617	12.1179	11.5816	11.7223	12.1131	11.6851	11.9852	12.3073	11.8458	11.7023	12.3808	11.9477
1	M1 UpD0 UpD6 Quiescence Vesicle SerumResponse	CAPS	100	10.0595	9.55872	9.99307	8.4365	8.39168	8.39004	8.59968	8.47766	8.34467	8.5233	8.72184	8.37584	8.5166	8.47418	8.85432	8.31486	8.46892	8.5971	8.52571	8.72515	8.47619	8.69039	9.00724	8.81109
1	M1 UpD0 UpD6 Quiescence Vesicle SerumResponse	CCDC84	100	9.95179	9.45795	9.74162	9.19937	9.29845	8.91103	9.70524	9.46075	9.21826	9.13885	9.53594	9.0409	9.26114	9.44803	9.02671	9.41977	9.52434	9.23827	9.44634	9.57344	9.27253	9.55673	9.77064	9.44776
1	M1 UpD0 UpD6 Quiescence Vesicle SerumResponse	CCS	100	9.54751	9.67092	9.55679	8.70061	8.79162	8.67238	9.22835	9.02877	8.85186	8.69515	9.01849	8.78585	8.72584	9.18393	9.13795	8.74056	9.13507	8.94669	8.85876	9.33994	8.89794	9.02505	9.2551	9.02572
1	M1 UpD0 UpD6 Quiescence Vesicle SerumResponse	CD52	100	13.904	14.2506	14.2666	12.6999	12.3225	12.2074	14.2553	12.4972	12.1405	12.6374	12.626	12.229	12.6216	13.1629	12.5177	12.4507	13.4523	12.8459	12.3553	13.3845	12.7218	12.9595	13.0431	12.755
1	M1 UpD0 UpD6 Quiescence Vesicle SerumResponse	CHD9	100	12.7745	12.8076	12.7218	10.585	11.0699	10.9149	11.3804	11.3824	11.0635	10.9614	11.0371	11.3124	10.9362	11.0627	11.2821	10.9108	11.443	11.2278	10.9755	11.4697	11.4891	11.7535	11.8673	11.7156
1	M1 UpD0 UpD6 Quiescence Vesicle SerumResponse	CHKB	100	10.0611	10.1104	10.2674	9.31931	9.25089	9.07101	9.88693	9.23731	9.07558	8.96015	9.3171	8.99461	9.13961	9.45884	9.146	9.10189	9.56587	9.22047	9.19547	9.53934	9.38208	9.41867	9.83587	9.56635
1	M1 UpD0 UpD6 Quiescence Vesicle SerumResponse	CLMN	100	8.50564	8.75886	8.39825	8.01014	8.13394	8.06385	8.45326	8.64097	8.17116	8.18829	8.76001	8.42585	8.17124	8.35167	8.20643	8.25823	8.23908	8.27127	8.46858	8.64129	8.16399	8.65448	8.64376	8.29069
1	M1 UpD0 UpD6 Quiescence Vesicle SerumResponse	CORO2B	100	8.59062	8.75917	8.35427	7.9457	7.92933	7.93978	8.03865	7.92462	8.01961	7.96698	8.04653	7.99594	7.96983	7.9556	7.95624	7.97495	8.16107	8.04625	8.04146	8.0038	7.94544	7.99047	8.03566	7.96074
1	M1 UpD0 UpD6 Quiescence Vesicle SerumResponse	DGLUCY	100	11.4566	10.9073	11.1736	9.86733	10.0333	9.78851	10.1082	10.0222	9.52192	9.43173	9.73712	9.78488	9.76155	10.1954	9.97571	9.76518	10.5145	9.97599	10.0713	10.7222	10.2176	10.3755	10.8825	10.5266
1	M1 UpD0 UpD6 Quiescence Vesicle SerumResponse	DPP7	100	10.2841	10.1316	10.285	9.5675	10.0414	9.71045	11.3184	9.9448	9.71433	9.6789	9.98613	9.56626	9.65103	9.9676	9.63772	9.65899	10.2057	9.66103	9.98873	10.1694	9.60899	10.1393	10.2375	9.69774
1	M1 UpD0 UpD6 Quiescence Vesicle SerumResponse	DUSP28	100	10.1976	10.3824	10.3007	9.30711	9.34344	9.20835	10.0115	9.61682	9.46791	9.31931	9.65992	9.397	9.42505	9.54121	9.40845	9.42295	9.66472	9.48205	9.49163	9.82098	9.46256	10.223	10.2576	9.80862
1	M1 UpD0 UpD6 Quiescence Vesicle SerumResponse	EIF3G	100	12.7319	12.8715	12.6002	11.8939	12.0957	11.8273	12.2892	12.274	11.9459	11.8947	12.3144	12.2334	12.0542	12.2334	11.9592	11.9704	12.4882	12.2786	12.0732	12.6924	12.3537	12.1149	12.4076	12.2093
1	M1 UpD0 UpD6 Quiescence Vesicle SerumResponse	FCGR2A	100	9.32077	8.4919	8.95225	8.46325	8.51626	8.42953	8.96791	8.58745	8.31477	8.33054	8.34976	8.24705	8.3494	8.43462	8.5321	8.40749	8.67696	8.6297	8.42247	8.68856	8.4785	8.58582	8.58412	8.56768
1	M1 UpD0 UpD6 Quiescence Vesicle SerumResponse	FLJ77644	100	9.59419	9.41436	9.29325	9.08402	9.04902	8.86292	9.58363	9.26854	8.77843	8.92829	9.06248	9.12938	9.11415	9.30593	9.03421	9.0459	9.17564	9.12349	8.90072	9.71647	9.24184	9.53239	9.77452	9.41136
1	M1 UpD0 UpD6 Quiescence Vesicle SerumResponse	FSTL3	100	8.65455	8.60712	8.36356	8.13678	8.14449	8.09805	8.19397	8.12136	8.16593	8.16842	8.14047	8.15841	8.07715	8.21749	8.15611	8.10726	8.18546	8.24002	8.11226	8.26752	8.19565	8.33599	8.43898	8.22178
1	M1 UpD0 UpD6 Quiescence Vesicle SerumResponse	FXYD5	100	13.8126	13.4361	13.4873	12.5917	12.7232	12.7696	13.1808	12.9181	12.8981	12.9469	12.7782	12.8231	12.7099	12.8091	12.6819	12.517	12.7985	12.6966	12.8317	13.1828	12.8427	12.9268	12.9073	13.1267
1	M1 UpD0 UpD6 Quiescence Vesicle SerumResponse	GDE1	100	9.15777	9.13062	8.86196	8.41494	8.47005	8.46449	9.64511	9.07963	8.58386	8.60461	8.99285	8.76529	8.61708	8.84791	8.65024	8.65428	8.89436	8.69364	8.78095	9.09981	8.71408	8.75399	8.91528	8.87491
1	M1 UpD0 UpD6 Quiescence Vesicle SerumResponse	GNPTG	100	10.3832	10.2812	10.1063	8.97064	9.1406	8.91892	10.1332	9.43282	8.91892	9.05624	9.45093	8.8772	9.08616	9.41509	8.87978	8.70657	9.16014	9.03145	8.97304	9.60314	8.80793	9.35107	9.75001	9.25411
1	M1 UpD0 UpD6 Quiescence Vesicle SerumResponse	GSE1	100	11.0616	10.7775	10.9605	8.94526	9.28326	9.09475	9.60777	8.96225	9.21666	9.04572	8.94575	9.14449	8.86489	9.82481	9.30757	9.03324	10.0684	9.59388	9.1945	10.1254	9.71324	9.4738	10.4555	9.96938
1	M1 UpD0 UpD6 Quiescence Vesicle SerumResponse	GUSBP2	100	10.6556	10.3169	10.2318	9.25477	9.57766	9.25332	9.69898	9.74765	9.70636	9.31788	9.47417	9.52181	9.53581	9.6798	9.69059	9.43508	9.52181	9.77841	9.62574	9.69121	9.80739	10.039	9.73681	9.92469
1	M1 UpD0 UpD6 Quiescence Vesicle SerumResponse	HELZ2	100	11.5036	11.598	11.8263	9.71696	9.75646	10.0094	10.4875	9.93297	10.2539	9.78078	9.82161	9.73076	9.75956	10.5593	9.99522	9.78078	10.498	10.3372	9.64076	10.2349	9.72278	10.3367	10.1309	9.93561
1	M1 UpD0 UpD6 Quiescence Vesicle SerumResponse	HERC1	100	10.4109	10.1929	10.4202	9.09279	9.66042	9.1987	10.0845	9.66929	9.30733	9.09215	9.45552	9.40324	9.30593	9.68422	9.4832	9.41509	9.84991	9.57697	9.49456	9.87042	9.67383	9.54961	10.13	9.80724
1	M1 UpD0 UpD6 Quiescence Vesicle SerumResponse	HEXDC	100	10.2552	10.1505	10.4698	8.58951	8.66262	8.51124	9.10231	8.79287	8.74279	8.60516	8.82997	8.75461	8.77446	9.02774	8.83353	8.58343	8.93758	8.76027	8.99076	9.08303	8.7346	8.80502	9.17339	8.81793
1	M1 UpD0 UpD6 Quiescence Vesicle SerumResponse	HMBOX1	100	9.58797	9.84269	9.53795	8.91787	8.90018	8.90731	10.1654	8.96112	9.0547	8.86441	8.89637	8.95719	8.70772	8.84249	8.77554	8.69482	9.00964	9.07617	8.80105	8.9775	9.10551	9.04202	9.08616	9.32577
1	M1 UpD0 UpD6 Quiescence Vesicle SerumResponse	HS.400131	100	8.56802	8.55474	8.43432	8.06563	8.0372	8.08893	8.13418	8.0687	8.09412	8.09241	8.18005	8.11406	8.19143	8.06306	8.08867	8.00674	8.2433	8.0592	8.14132	8.25176	7.93389	8.23508	8.21835	8.119
1	M1 UpD0 UpD6 Quiescence Vesicle SerumResponse	HS.527071	100	9.34114	10.048	9.11479	8.24159	8.41066	8.2105	8.5493	8.60339	8.12732	8.40639	8.39528	8.33295	8.4769	8.41747	8.38205	8.3971	8.51452	8.52007	8.38346	8.53174	8.28161	8.40205	8.40023	8.43462
1	M1 UpD0 UpD6 Quiescence Vesicle SerumResponse	IPO8	100	9.91025	10.0122	9.69321	9.36774	9.70038	9.3271	9.64408	9.63162	9.27907	9.21535	9.73034	9.34296	9.31728	9.79101	9.38964	9.4664	9.98042	9.46696	9.2783	9.83675	9.43952	9.40543	10.0808	9.68316
1	M1 UpD0 UpD6 Quiescence Vesicle SerumResponse	IQSEC1	100	11.342	10.7572	10.9811	9.29457	9.65312	9.52904	10.1986	9.71295	9.23605	8.9419	9.63368	9.40675	8.86369	10.2245	9.52904	9.07469	10.5556	9.93357	9.50392	10.7584	10.1159	9.91944	11.1102	10.4511
1	M1 UpD0 UpD6 Quiescence Vesicle SerumResponse	IRF7	100	9.15727	9.48992	9.44803	8.38383	8.18272	8.49861	10.7599	8.61772	8.70813	8.38315	8.60516	8.79473	8.31423	8.79026	8.73969	8.32538	9.03659	8.98771	8.41225	9.20417	9.06501	8.85142	9.09698	8.98969
1	M1 UpD0 UpD6 Quiescence Vesicle SerumResponse	JADE1	100	9.89641	10.2349	9.97268	9.41946	10.008	9.80447	10.5442	10.1842	9.64843	9.78785	10.1217	9.65012	9.68516	9.9911	9.42576	9.59765	9.79511	9.33073	9.55254	10.135	9.50083	10.0878	10.5279	10.0603
1	M1 UpD0 UpD6 Quiescence Vesicle SerumResponse	KCNMB2	100	8.89979	8.94866	8.83118	8.31761	8.23246	8.22505	9.21975	8.33996	8.24522	8.32401	8.30456	8.31377	8.33092	8.36787	8.27427	8.23236	8.47685	8.27707	8.16139	8.43961	8.34003	8.58293	8.3679	8.39407
1	M1 UpD0 UpD6 Quiescence Vesicle SerumResponse	LINC00926	100	11.9975	12.4672	11.8697	9.15583	9.5566	9.42717	10.9436	9.26316	8.86523	8.4738	9.37148	8.79279	8.66022	9.58862	9.57766	8.81055	10.2351	9.90726	9.11914	9.90431	9.21045	10.3766	9.69507	9.33874
1	M1 UpD0 UpD6 Quiescence Vesicle SerumResponse	LOC196752	100	9.47139	9.43996	9.3455	8.65774	8.69883	8.65067	8.93886	9.07526	8.78691	8.78785	9.09224	8.79678	8.72113	8.9386	8.82963	8.80889	8.91651	8.79904	8.79209	9.01884	8.77991	9.21435	9.20936	8.58696
1	M1 UpD0 UpD6 Quiescence Vesicle SerumResponse	LOC391578	100	9.48422	9.78052	9.33043	9.06818	9.13383	9.03715	10.0671	9.25411	9.06907	9.24646	9.27154	8.98817	8.9878	9.12054	8.96608	8.87993	9.20019	8.93108	9.11788	9.51983	9.15899	9.39263	9.23304	9.22001
1	M1 UpD0 UpD6 Quiescence Vesicle SerumResponse	LOC440311	100	9.35017	9.60259	9.28959	8.66593	8.67845	8.48759	9.23225	8.64961	8.45749	8.53631	8.78667	8.47474	8.50736	8.7885	8.48033	8.50898	8.69323	8.53985	8.54934	8.65801	8.51326	8.59926	8.70409	8.62174
1	M1 UpD0 UpD6 Quiescence Vesicle SerumResponse	LOC729841	100	12.7291	12.8317	12.5656	11.863	11.9769	12.0153	12.4738	11.8383	11.8716	11.8362	12.0135	11.9235	11.8974	12.0836	12.1922	12.0001	12.6162	12.4239	12.1791	12.5112	12.1381	12.1397	12.1645	12.1457
1	M1 UpD0 UpD6 Quiescence Vesicle SerumResponse	LOC729843	100	11.0345	11.5339	11.0944	10.0648	10.3646	10.1008	10.8623	10.7726	10.4432	10.0842	10.6585	10.5041	10.1053	10.9991	10.795	10.1553	10.8972	10.7348	10.4997	11.1494	11.0081	11.3136	11.6673	11.4091
1	M1 UpD0 UpD6 Quiescence Vesicle SerumResponse	LRCH4	100	11.6298	11.401	11.3908	9.72175	9.98543	9.69848	10.2435	10.1103	9.70192	9.72181	10.1836	9.84299	10.0156	10.4165	10.1286	9.93764	10.6292	10.1775	10.1325	10.6083	9.97104	10.4578	10.554	10.0093
1	M1 UpD0 UpD6 Quiescence Vesicle SerumResponse	LRP10	100	12.2123	13.1502	12.5917	11.1513	11.0257	11.194	13.0208	11.9667	11.8068	11.2769	12.2093	12.1302	11.1921	12.108	12.116	11.2957	12.078	11.9994	11.4588	12.2273	12.1397	12.029	12.5685	12.1376
1	M1 UpD0 UpD6 Quiescence Vesicle SerumResponse	MAN1B1	100	10.731	10.6175	10.6499	9.61082	9.58177	9.37933	9.9753	10.0457	9.41705	9.7793	10.0377	9.79579	9.60792	9.89022	9.58131	9.72508	9.78915	9.46882	9.86025	10.1313	9.7592	10.267	10.1898	10.085
1	M1 UpD0 UpD6 Quiescence Vesicle SerumResponse	NAGLU	100	9.18796	9.87612	9.54571	8.78792	8.92109	8.73643	9.38573	9.00179	8.5767	8.56269	8.88329	8.85519	8.80436	8.85094	9.08021	8.56881	9.03078	8.77603	8.77325	9.41098	8.93742	8.93017	9.73847	9.41962
1	M1 UpD0 UpD6 Quiescence Vesicle SerumResponse	NAT9	100	10.4264	10.5583	10.3483	9.52355	9.89932	9.3237	10.3835	9.92563	9.59156	9.54335	9.90764	9.6889	9.65796	9.67008	9.52318	9.60874	9.69321	9.61924	9.78181	9.82931	9.62744	9.77297	9.9788	9.79901
1	M1 UpD0 UpD6 Quiescence Vesicle SerumResponse	NDRG3	100	10.7667	10.9712	10.7048	9.56436	9.53354	9.62087	9.64169	9.55408	9.51159	9.29555	9.60964	9.50543	9.58293	9.61565	9.80829	9.48409	9.36207	9.57174	9.5741	9.68674	9.7076	9.27057	9.76485	9.67597
1	M1 UpD0 UpD6 Quiescence Vesicle SerumResponse	NIPAL3	100	9.9349	9.39968	9.63285	9.3263	9.46905	9.39943	9.64666	9.70407	9.30297	9.38717	9.36695	9.37787	9.23894	9.51159	9.24739	9.13433	9.47655	9.40444	9.20684	9.78464	9.47594	9.78851	9.90661	9.7489
1	M1 UpD0 UpD6 Quiescence Vesicle SerumResponse	OCEL1	100	10.1015	10.9821	10.5176	9.58237	10.0119	9.80146	10.2111	10.0063	9.70995	9.27896	10.0948	9.71127	9.39124	10.2535	9.74316	9.36798	10.2672	9.77029	9.57113	10.5771	10.0012	10.3005	10.615	10.3564
1	M1 UpD0 UpD6 Quiescence Vesicle SerumResponse	PARP6	100	9.64307	9.55726	9.62837	8.94148	8.86523	8.77896	9.72194	8.89255	8.95835	8.97723	9.01821	8.85325	8.81351	8.78746	8.85861	8.80011	8.91229	8.7882	8.87937	8.98572	8.81751	8.93155	9.07823	9.13303
1	M1 UpD0 UpD6 Quiescence Vesicle SerumResponse	PBXIP1	100	9.44602	9.16205	9.09156	8.22288	8.22457	8.20132	8.9214	8.43151	8.29307	8.28931	8.19701	8.23009	8.05165	8.40289	8.381	8.17171	8.31456	8.39168	8.31716	8.72373	8.49304	8.34795	8.54409	8.55343
1	M1 UpD0 UpD6 Quiescence Vesicle SerumResponse	PHF1	100	9.27552	9.44958	9.20231	8.31444	8.25379	8.26896	9.18232	8.35946	8.26991	8.30325	8.33193	8.31036	8.29083	8.34877	8.30604	8.19346	8.37658	8.23123	8.39572	8.45836	8.20111	8.37064	8.51317	8.32376
1	M1 UpD0 UpD6 Quiescence Vesicle SerumResponse	PIGHP1	100	9.70343	9.79014	9.70361	9.18217	9.17092	9.16205	9.648	9.31179	9.38202	9.25259	9.40179	9.37121	9.19025	9.26381	9.1376	9.27017	9.34066	9.04911	9.50864	9.57241	9.17378	9.53196	9.6391	9.40156
1	M1 UpD0 UpD6 Quiescence Vesicle SerumResponse	PMEPA1	100	9.27772	9.76719	9.30721	8.43145	8.4276	8.22096	9.79744	8.97383	9.11223	8.89198	8.94494	8.6193	8.51158	9.12513	8.62455	8.63388	9.28703	8.83393	8.59073	9.44214	8.94092	9.1282	9.61346	9.289
1	M1 UpD0 UpD6 Quiescence Vesicle SerumResponse	PNKP	100	10.6607	11.3187	10.8175	10.313	10.4482	10.2943	11.0829	10.554	10.332	10.1583	10.5901	10.33	9.88269	10.6699	10.6907	9.62651	10.6281	10.2554	10.1234	11.0277	10.6205	10.5467	11.3653	10.7222
1	M1 UpD0 UpD6 Quiescence Vesicle SerumResponse	POU2F1	100	9.92319	9.44776	9.27896	8.57175	9.14273	8.68256	9.34814	9.16027	8.73068	8.70018	9.2434	9.07291	8.97081	9.5	9.05062	9.15789	9.63483	9.08112	9.29715	9.67919	9.11799	9.28595	9.85241	9.13639
1	M1 UpD0 UpD6 Quiescence Vesicle SerumResponse	PPP2R5B	100	9.16306	9.11877	8.98136	8.37596	8.44803	8.37065	9.04505	8.58682	8.35717	8.40368	8.53344	8.49049	8.34598	8.64829	8.424	8.31691	8.8212	8.46845	8.45965	8.94972	8.70541	8.83791	9.24259	8.73549
1	M1 UpD0 UpD6 Quiescence Vesicle SerumResponse	PRKD2	100	9.32287	9.03193	9.27329	8.45765	8.39504	8.47719	8.99466	8.49467	8.54198	8.29426	8.54777	8.51013	8.45307	9.03779	8.96914	8.57306	9.22111	9.08159	8.76405	9.25588	9.4493	8.74483	9.35601	9.39144
1	M1 UpD0 UpD6 Quiescence Vesicle SerumResponse	RAP1GAP2	100	9.63298	9.65283	9.43343	8.1547	8.09628	8.10608	8.30029	8.16691	8.16448	8.14195	8.15771	8.20013	8.24699	8.45088	8.10503	8.16067	8.8336	8.33796	8.14245	8.84302	8.56914	8.34795	8.98161	8.8549
1	M1 UpD0 UpD6 Quiescence Vesicle SerumResponse	RAPGEF6	100	10.4706	10.8553	10.3222	9.48436	10.0136	9.70273	10.3878	9.66175	9.89057	9.61488	9.6711	9.66257	9.59066	9.79464	9.82313	9.63162	10.0235	10.1015	9.77747	10.1156	10.3864	9.9033	10.3372	10.126
1	M1 UpD0 UpD6 Quiescence Vesicle SerumResponse	RNPEPL1	100	9.26587	9.392	9.07988	8.44819	8.47629	8.3736	8.83923	8.82713	8.59577	8.27067	8.87962	8.74478	8.51821	8.7965	8.65496	8.4313	8.80647	8.80347	8.55337	8.89405	8.80602	8.85519	9.21643	8.81751
1	M1 UpD0 UpD6 Quiescence Vesicle SerumResponse	RXRA	100	9.40968	9.15252	8.83036	7.95735	7.98727	7.89583	7.96175	7.9788	8.04227	8.01764	7.90656	7.95169	7.90081	7.93994	7.92019	7.93519	7.92558	8.08492	7.96733	8.00609	8.03783	8.09522	8.14952	8.09683
1	M1 UpD0 UpD6 Quiescence Vesicle SerumResponse	SEC16A	100	11.0282	11.2462	11.3481	10.2777	10.8491	10.8009	11.1793	10.9418	10.7204	10.1678	10.822	10.9099	10.3483	11.1351	11.1133	10.7822	11.2031	11.1015	10.8879	11.4786	11.4119	10.9728	11.5464	11.2575
1	M1 UpD0 UpD6 Quiescence Vesicle SerumResponse	SELL	100	12.3355	12.8161	11.9839	10.4497	11.3817	10.7599	11.6934	11.3337	10.4989	10.1446	11.4052	10.7802	10.8534	12.6431	11.0585	10.9272	12.7845	11.2374	11.0901	12.3169	11.2306	11.1595	12.3997	11.5643
1	M1 UpD0 UpD6 Quiescence Vesicle SerumResponse	SEMA4B	100	11.7086	11.4638	11.7773	8.78975	8.79044	8.78856	9.22682	9.28901	8.97019	8.7718	9.09837	9.20615	8.74863	9.53652	9.22097	8.77435	9.84075	9.60152	9.1143	10.1281	9.84799	9.44826	10.1364	9.91944
1	M1 UpD0 UpD6 Quiescence Vesicle SerumResponse	SHC1	100	11.4922	11.4396	11.0861	10.172	10.319	10.0721	10.9714	10.8725	10.7138	10.3488	10.7233	10.7124	9.97571	11.0306	10.6838	10.2137	11.0443	10.4668	10.4558	11.4364	10.7807	10.9893	11.577	11.1384
1	M1 UpD0 UpD6 Quiescence Vesicle SerumResponse	SHISA5	100	12.4892	12.9538	12.4272	9.59126	10.1542	10.0069	11.0624	10.669	10.0359	9.5612	10.9546	10.4173	10.1099	11.2965	10.7649	10.3496	11.6338	10.861	11.0192	11.8133	11.3314	11.2089	11.7535	11.4105
1	M1 UpD0 UpD6 Quiescence Vesicle SerumResponse	SNX17	100	12.0335	12.3763	11.9035	10.9134	10.9188	10.7343	12.5035	10.9717	10.7453	10.5919	11.4243	11.0857	10.85	11.3831	11.3278	10.862	11.5408	11.1525	11.0087	11.6346	11.3407	11.0495	11.7359	11.5078
1	M1 UpD0 UpD6 Quiescence Vesicle SerumResponse	SNX22	100	11.3413	11.5205	11.2802	9.38558	9.39475	9.27896	10.6964	9.26553	9.21556	9.20961	9.39837	9.15451	9.12162	9.27658	9.38066	9.08681	9.45439	9.50634	9.15207	9.82728	9.1899	9.77064	10.1711	9.82604
1	M1 UpD0 UpD6 Quiescence Vesicle SerumResponse	SPSB3	100	12.2474	11.9936	12.3422	10.3696	10.6614	10.5279	11.1284	10.9478	10.5389	10.6926	11.0125	10.6604	10.7169	11.0513	10.757	10.618	11.0406	10.6444	10.7029	11.0909	10.6472	11.4272	11.3441	10.9815
1	M1 UpD0 UpD6 Quiescence Vesicle SerumResponse	TAB1	100	9.53131	9.8816	9.28021	8.70805	9.06122	8.71183	10.8392	9.6483	9.00567	8.68416	9.49163	9.18847	8.89476	9.33162	9.28034	8.83439	9.40527	8.96112	9.18925	9.57489	9.38169	9.2399	9.84799	9.51945
1	M1 UpD0 UpD6 Quiescence Vesicle SerumResponse	TADA2B	100	10.1184	9.73556	9.90106	8.27198	8.66742	8.87133	9.41256	9.17219	9.21345	8.91806	9.1799	9.15868	9.01779	9.49339	9.46683	9.10812	9.55133	9.40068	9.25084	9.62368	9.6789	9.51551	9.78208	9.64366
1	M1 UpD0 UpD6 Quiescence Vesicle SerumResponse	TBC1D14	100	10.6798	10.7141	10.5523	9.6696	10.3115	9.90136	10.2866	10.2027	9.97404	9.69321	10.2188	10.1142	9.82653	10.2367	10.353	9.86733	10.4755	10.3208	10.1012	10.8695	10.7209	10.3562	11.3845	10.8831
1	M1 UpD0 UpD6 Quiescence Vesicle SerumResponse	TCF25	100	12.7487	12.4962	12.5685	11.4604	11.7813	11.6091	12.5751	11.9018	11.6664	11.9051	12.0897	11.9132	11.9667	12.0169	11.8337	11.892	12.069	11.9271	12.0897	12.2865	11.7131	12.2995	12.4882	12.2514
1	M1 UpD0 UpD6 Quiescence Vesicle SerumResponse	TEX264	100	10.0623	10.4461	10.0754	9.40028	9.37933	9.36598	10.4911	9.73328	9.29555	9.38307	9.72104	9.61353	9.38903	9.758	9.5226	9.37231	9.9127	9.44973	9.59549	9.93619	9.80923	9.43965	9.97502	9.79084
1	M1 UpD0 UpD6 Quiescence Vesicle SerumResponse	TGOLN2	100	11.9555	12.0897	12.0335	10.7257	10.5744	10.8295	11.5174	11.0054	10.8594	11.0383	11.022	10.6585	10.8473	11.1714	10.5901	10.8585	11.1177	11.059	10.8338	11.0524	10.8247	10.9927	11.2401	10.9789
1	M1 UpD0 UpD6 Quiescence Vesicle SerumResponse	TINF2	100	12.419	13.0143	12.3591	10.9278	11.0909	11.0545	12.1397	11.4052	11.1389	10.8998	11.5295	11.6167	11.0271	11.6812	11.4624	11.0635	11.8355	11.4387	11.2842	12.1854	11.5581	11.6821	12.258	11.8297
1	M1 UpD0 UpD6 Quiescence Vesicle SerumResponse	TRAPPC5	100	10.9709	11.6314	11.2562	10.2147	10.7366	10.2761	11.2323	10.7315	10.2848	10.1967	10.8886	10.3816	10.0418	10.8755	10.1817	10.104	11.2001	10.5383	10.5639	11.5553	10.9083	11.0227	11.5995	11.2343
1	M1 UpD0 UpD6 Quiescence Vesicle SerumResponse	TREML2	100	9.24306	9.90041	8.88768	8.47565	8.73016	8.39728	9.7076	8.90655	8.41793	8.45466	9.05117	8.68283	8.63371	9.37933	8.61512	8.58474	9.22255	8.74617	8.80011	9.24405	9.08431	8.69933	9.27783	9.1823
1	M1 UpD0 UpD6 Quiescence Vesicle SerumResponse	TRIM26	100	11.0414	11.0749	10.2966	9.7728	10.0614	9.46075	11.5285	10.4501	10.0168	9.86733	10.6233	10.039	10.1153	10.5333	10.0855	9.93742	10.8003	10.1204	10.2162	10.9144	10.3312	10.0298	10.9641	10.3627
1	M1 UpD0 UpD6 Quiescence Vesicle SerumResponse	UBE2O	100	9.60392	9.60134	9.47643	8.95354	9.27732	8.70734	9.75887	9.31701	9.11025	8.99447	9.21847	9.03363	9.05194	9.09541	8.97723	9.11715	9.3349	9.04114	9.44733	9.39274	9.02043	9.31774	9.39814	9.03734
1	M1 UpD0 UpD6 Quiescence Vesicle SerumResponse	UNC93B1	100	11.0486	11.0609	10.9076	9.51788	9.91847	9.39624	10.5848	9.71978	9.36382	8.93734	9.89164	9.40636	9.29325	10.5442	9.99849	9.38774	10.684	9.86562	9.61519	10.7706	10.0166	9.64122	10.9347	10.1304
1	M1 UpD0 UpD6 Quiescence Vesicle SerumResponse	UNC93B3	100	8.66413	8.79698	8.61606	8.27161	8.28999	8.19064	8.98521	8.28111	8.15287	8.14514	8.43432	8.09469	8.21464	8.67408	8.33293	8.22814	8.69598	8.39253	8.22873	8.91936	8.31404	8.26881	8.76051	8.44548
1	M1 UpD0 UpD6 Quiescence Vesicle SerumResponse	USP34	100	10.4606	10.1399	10.3488	9.37681	9.55209	9.49373	9.9033	9.50604	9.4924	9.47542	9.53763	9.57215	9.50816	9.48833	9.43066	9.59335	9.5793	9.58349	9.4594	9.74791	9.67166	9.63241	9.786	9.75557
1	M1 UpD0 UpD6 Quiescence Vesicle SerumResponse	VAT1	100	10.256	10.4555	9.6038	8.7051	9.26086	8.9146	9.5809	9.45795	9.07186	8.92716	9.34413	9.14206	8.80436	9.26245	8.96242	8.91674	9.17378	8.76632	9.08824	9.53309	9.06226	9.15741	9.49561	9.17933
1	M1 UpD0 UpD6 Quiescence Vesicle SerumResponse	VPS37B	100	10.5595	10.9472	10.5749	9.92629	10.4109	10.2451	10.6451	10.3297	10.0114	9.65153	10.4436	10.2058	9.51526	10.4135	10.3449	9.65814	10.4223	10.2657	9.84923	10.9666	10.6378	10.0012	11.0614	10.6227
1	M1 UpD0 UpD6 Quiescence Vesicle SerumResponse	VPS51	100	13.138	13.3698	12.8646	11.4416	11.7827	11.5182	12.7445	12.1613	11.6474	11.8603	12.3693	12.0279	11.5863	12.3293	11.865	11.6197	12.2496	11.5976	11.8978	12.382	11.8809	12.3741	12.5024	12.1356
1	M1 UpD0 UpD6 Quiescence Vesicle SerumResponse	VPS52	100	9.69958	9.64244	9.47775	8.98246	9.13409	8.75697	9.74907	9.5582	8.74704	8.96813	9.49948	9.2095	9.12757	9.45955	9.20326	8.98892	9.36876	9.09128	9.03917	9.52063	9.16831	9.30579	9.7781	9.31504
1	M1 UpD0 UpD6 Quiescence Vesicle SerumResponse	YPEL3	100	10.8935	11.038	11.1555	9.16574	9.14803	9.22015	10.5389	9.35648	9.08755	9.11609	9.48078	9.41875	9.18692	9.79296	9.53933	9.18012	9.74489	9.79214	9.10728	10.1355	9.81571	10.164	10.3149	10.0199
1	M1 UpD0 UpD6 Quiescence Vesicle SerumResponse	ZDHHC4	100	10.2157	10.1521	9.75087	9.3397	9.65843	9.40303	9.82786	10.032	9.58293	9.54785	10.2069	9.76263	9.55091	9.96375	9.56206	9.56895	9.7793	9.36554	10.1426	10.1729	9.58543	10.1669	10.447	9.95371
1	M1 UpD0 UpD6 Quiescence Vesicle SerumResponse	ZNF419	100	10.5514	10.3451	10.1442	9.70874	9.70904	9.19099	10.109	9.98878	9.55422	9.65251	9.80146	9.45873	9.4621	9.71552	9.22888	9.4898	9.65595	9.34179	9.66115	9.82771	9.52522	10.1364	10.35	9.73602
1	M1 UpD0 UpD6 Quiescence Vesicle SerumResponse	ZNF845	100	10.3142	9.68865	9.509	8.53556	8.94857	8.82249	9.45245	9.11627	8.72558	9.08738	8.9835	8.98086	8.94962	9.21655	8.93603	8.90287	9.22389	9.09709	8.90648	9.23052	9.04881	9.1467	9.28201	9.14683
1	M1 UpD0 UpD6 Quiescence Vesicle SerumResponse	ABHD16A	98.9899	9.58576	9.82079	9.51526	9.08971	9.10592	8.98382	10.2933	9.62587	9.09944	9.1347	9.55872	9.2805	9.13875	9.58797	9.34135	9.09389	9.61751	9.31931	9.1678	9.91732	9.47332	9.13002	9.82313	9.42052
1	M1 UpD0 UpD6 Quiescence Vesicle SerumResponse	ACAA1	98.9899	9.8816	10.329	10.338	9.73902	10.026	9.83498	10.4044	10.1721	9.8	9.60455	10.1127	9.78421	9.64292	10.1036	9.74162	9.83209	10.2712	10.2169	9.95274	10.4356	9.79761	9.75352	10.1636	9.97237
1	M1 UpD0 UpD6 Quiescence Vesicle SerumResponse	ADPGK	98.9899	11.1555	10.9686	10.8569	9.95534	10.1711	9.85605	10.2745	10.1057	10.1602	9.98353	9.95687	10.0062	10.2351	10.0151	10.1402	10.0396	10.0849	10.1678	10.3212	10.2905	10.2136	10.2285	10.4111	10.3165
1	M1 UpD0 UpD6 Quiescence Vesicle SerumResponse	ANKZF1	98.9899	10.1385	9.69059	9.82555	9.32237	9.52522	8.93372	9.8564	9.10315	8.681	8.68762	9.0829	8.80677	8.81039	9.11894	8.93292	8.93886	9.47168	8.79854	9.3062	9.55833	9.16452	9.76466	9.49536	9.31953
1	M1 UpD0 UpD6 Quiescence Vesicle SerumResponse	ARHGAP4	98.9899	12.4567	12.228	12.4661	9.87579	10.1476	10.1532	10.7023	10.2807	10.0731	9.90001	10.3005	10.0732	10.2465	10.73	10.6111	9.96558	10.8891	10.7176	10.0469	10.9512	10.2831	10.1967	10.877	10.3464
1	M1 UpD0 UpD6 Quiescence Vesicle SerumResponse	ARPC3P5	98.9899	12.0267	12.0754	11.7835	11.3395	11.4152	11.0927	12.9001	11.2089	11.2434	11.022	11.2019	11.2388	11.1045	11.5278	11.5262	11.1762	11.8458	11.6617	11.5036	11.73	11.5212	11.493	11.5832	11.432
1	M1 UpD0 UpD6 Quiescence Vesicle SerumResponse	ATG9A	98.9899	9.55951	9.5384	9.41678	8.9732	9.35448	8.93505	10.1085	9.6511	9.00071	9.03854	9.53878	9.28707	8.88702	9.56177	9.32105	9.04302	9.5273	9.174	9.00193	9.63101	9.32131	9.18379	9.6108	9.27932
1	M1 UpD0 UpD6 Quiescence Vesicle SerumResponse	ATXN10	98.9899	9.01206	9.00221	8.7949	8.38502	8.53025	8.39389	9.22888	8.5499	8.40608	8.42533	8.4356	8.42126	8.4042	8.52684	8.36822	8.48531	8.64036	8.2886	8.54844	8.69933	8.53199	8.5538	8.8115	8.71349
1	M1 UpD0 UpD6 Quiescence Vesicle SerumResponse	BTN3A1	98.9899	10.5672	9.9788	10.4037	8.61735	8.66577	8.77775	8.95509	8.48811	8.5194	8.69301	8.52336	8.52028	8.54035	8.70176	8.6221	8.75963	9.01334	8.63045	9.21389	9.57557	9.31376	9.79179	9.98454	9.82043
1	M1 UpD0 UpD6 Quiescence Vesicle SerumResponse	C16orf58	98.9899	12.1437	12.3225	12.2267	11.1302	11.2401	11.1816	12.5904	11.3494	11.2037	10.9605	11.3454	11.2478	11.2965	11.4847	11.3985	11.4833	11.7013	11.5255	11.8538	12.2184	11.8503	12.1728	12.5863	12.0945
1	M1 UpD0 UpD6 Quiescence Vesicle SerumResponse	CASP4	98.9899	12.1809	12.4781	12.0533	11.206	11.3883	11.2784	11.2746	10.9795	10.962	10.9257	11.3284	11.0765	11.0125	11.2421	11.2267	10.9658	11.3544	10.8108	11.351	11.6258	11.1819	11.9658	11.7202	11.5801
1	M1 UpD0 UpD6 Quiescence Vesicle SerumResponse	CBX4	98.9899	10.4223	10.6407	10.5164	9.43811	9.50033	9.65529	10.068	8.95844	9.03757	8.97219	8.92372	8.92187	8.94717	9.25425	8.98341	9.1396	9.44128	9.32818	9.5892	10.1474	9.82493	10.0655	10.4819	10.1495
1	M1 UpD0 UpD6 Quiescence Vesicle SerumResponse	CCDC32	98.9899	11.1296	11.3806	11.108	10.4435	10.5473	10.5047	10.6554	10.2907	10.1368	10.2258	10.471	10.3736	10.3416	10.4391	10.3208	10.3677	10.7164	10.6166	10.4933	10.9683	10.7047	10.7455	11.1541	11.2451
1	M1 UpD0 UpD6 Quiescence Vesicle SerumResponse	CD79A	98.9899	12.0573	12.2432	12.1958	10.0063	9.76309	9.8305	11.9243	9.8982	9.85144	9.89525	10.2041	9.89461	10.267	10.9777	10.3278	10.3674	11.1755	10.8211	10.7194	11.0174	10.6967	11.4553	11.0159	10.7468
1	M1 UpD0 UpD6 Quiescence Vesicle SerumResponse	CD79B	98.9899	13.7923	14.2101	14.1115	10.2579	10.2974	10.6539	12.0672	10.9247	10.9118	10.0465	11.4444	11.4489	10.9079	12.0672	12.0542	11.4178	12.3583	12.1537	11.4588	12.3901	11.8222	11.7909	12.3237	11.8496
1	M1 UpD0 UpD6 Quiescence Vesicle SerumResponse	CLK2	98.9899	10.0539	10.1099	10.2734	9.73962	9.98708	9.39556	10.0307	10.0506	9.52067	9.61629	9.83752	9.70026	9.45637	9.89882	9.68833	9.5694	9.8978	9.75424	9.67264	10.0926	9.73951	9.79622	10.0567	9.98968
1	M1 UpD0 UpD6 Quiescence Vesicle SerumResponse	CLK3	98.9899	10.0508	9.99931	9.98572	9.7278	9.64427	9.51937	10.1506	9.79182	8.98342	9.4561	9.70646	9.44987	9.54747	9.62322	9.30123	9.59821	9.78299	9.35467	9.9169	9.70597	9.57102	9.97867	9.78557	9.74383
1	M1 UpD0 UpD6 Quiescence Vesicle SerumResponse	CNOT2	98.9899	11.5433	11.6338	11.0408	10.8027	11.06	10.8994	11.1384	10.8681	10.7194	11.0288	10.8918	10.8247	10.7983	10.8042	10.7334	11.0311	10.9958	10.9149	10.7869	10.8155	10.8923	10.8886	10.9941	11.2447
1	M1 UpD0 UpD6 Quiescence Vesicle SerumResponse	CNPY3	98.9899	10.5036	10.5698	10.2617	8.90673	8.79601	8.82467	12.3459	9.17866	9.03001	8.91389	9.23619	9.21446	9.1759	9.5753	9.42645	9.33259	9.40247	9.30948	9.36911	9.56755	9.30817	9.15591	9.47123	9.32644
1	M1 UpD0 UpD6 Quiescence Vesicle SerumResponse	COG1	98.9899	8.78115	8.83182	8.62071	8.4856	8.45911	8.33097	9.76121	8.48903	8.27956	8.15473	8.51868	8.39626	8.08423	8.31045	8.1441	8.20852	8.35847	8.1876	8.42513	8.63408	8.35788	8.5134	8.82963	8.53519
1	M1 UpD0 UpD6 Quiescence Vesicle SerumResponse	CRIPAK	98.9899	8.98056	9.12946	9.05593	8.28497	8.42305	8.20933	9.35902	8.31741	8.21179	8.18066	8.4126	8.27434	8.22125	8.34003	8.36162	8.16519	8.44321	8.21374	8.31588	8.36233	8.39622	8.39	8.81351	8.37857
1	M1 UpD0 UpD6 Quiescence Vesicle SerumResponse	CTBP1	98.9899	11.3664	11.974	11.5853	10.5991	10.8165	10.7447	12.1335	11.0513	11.1691	10.6491	11.1185	11.0852	10.6353	11.519	11.26	10.8671	11.5167	11.2587	10.7729	11.453	11.481	10.9328	11.5501	11.4671
1	M1 UpD0 UpD6 Quiescence Vesicle SerumResponse	CTDNEP1	98.9899	9.8626	10.2294	9.75475	9.23839	9.91459	9.18619	10.8175	9.76103	9.3512	9.39031	9.74921	9.29999	9.16424	9.84075	9.38522	9.44602	10.0115	9.4367	9.54691	10.108	9.7781	9.26392	9.94301	9.67027
1	M1 UpD0 UpD6 Quiescence Vesicle SerumResponse	DAXX	98.9899	9.30673	9.67905	9.37799	8.91528	9.26843	8.92264	10.1422	9.32125	9.02267	9.03473	9.28789	9.13176	9.00031	9.49407	9.18489	8.92707	9.51612	9.2448	9.08772	9.52536	9.35412	8.94761	9.52244	9.55351
1	M1 UpD0 UpD6 Quiescence Vesicle SerumResponse	DAZAP2	98.9899	13.8023	13.9562	13.8447	12.6344	12.9966	12.9966	13.3385	13.112	12.8555	13.0431	13.2833	13.0924	12.9649	13.5135	12.9287	13.219	13.4093	13.2739	13.1183	13.3903	13.3385	13.2019	13.4681	13.138
1	M1 UpD0 UpD6 Quiescence Vesicle SerumResponse	DCXR	98.9899	10.1129	10.4194	10.2831	9.81798	10.0501	9.83743	11.5934	10.4071	9.94063	9.81376	10.4854	10.0232	10.0472	10.6295	10.1457	9.96456	10.6677	10.2033	10.2126	10.6522	10.302	9.89667	10.6002	10.1992
1	M1 UpD0 UpD6 Quiescence Vesicle SerumResponse	DENND3	98.9899	9.60167	9.88402	9.41483	8.94477	9.66408	9.02682	10.9938	9.07005	8.7166	8.70894	9.34768	8.77546	8.92969	9.48721	9.31376	8.77775	9.70008	9.36371	8.81173	9.66026	8.91651	9.10564	9.51377	8.77775
1	M1 UpD0 UpD6 Quiescence Vesicle SerumResponse	DTNBP1	98.9899	8.98256	9.31638	8.79826	8.11712	8.3208	8.36466	8.57032	8.61396	8.23616	8.07423	8.55268	8.36101	8.24149	8.56371	8.5132	8.18241	8.7293	8.53634	8.22308	8.65202	8.39394	8.36664	8.89891	8.404
1	M1 UpD0 UpD6 Quiescence Vesicle SerumResponse	EDF1	98.9899	11.4776	11.5356	11.471	11.2223	11.0624	11.1158	11.9695	11.1799	11.0868	11.4024	11.318	11.3764	11.2105	11.3977	11.2394	11.2821	11.3717	11.0242	11.4662	11.6735	11.3608	11.5553	11.5381	11.606
1	M1 UpD0 UpD6 Quiescence Vesicle SerumResponse	EEF1D	98.9899	12.5113	12.494	12.3004	11.4229	11.5276	11.2821	12.8962	11.4595	11.2186	11.3807	11.4295	10.9636	11.2959	11.5854	11.0381	11.3483	11.7804	11.2296	11.5796	11.9598	11.6074	11.6784	11.7536	11.7299
1	M1 UpD0 UpD6 Quiescence Vesicle SerumResponse	EPG5	98.9899	9.00724	9.11016	8.59401	8.18722	8.41923	8.23897	8.85044	8.3244	8.23511	8.16531	8.17798	8.21234	8.12659	8.30397	8.20721	8.23683	8.34212	8.14435	8.15497	8.2093	8.21074	8.28311	8.3396	8.28725
1	M1 UpD0 UpD6 Quiescence Vesicle SerumResponse	GALNS	98.9899	8.60403	9.1194	8.94877	8.32241	8.17046	8.41717	8.63616	8.5155	8.35925	8.34278	8.4675	8.4877	8.28651	8.64883	8.44875	8.31534	8.53969	8.5857	8.35537	8.5194	8.56672	8.46977	8.5933	8.54549
1	M1 UpD0 UpD6 Quiescence Vesicle SerumResponse	GBA2	98.9899	9.43485	9.66408	9.4458	8.43489	8.52127	8.39677	9.4816	8.97958	8.69422	8.64947	9.01013	8.98882	8.90999	9.01655	8.93758	8.90072	9.26327	8.99829	9.15766	9.40784	9.26716	9.25895	9.44034	9.30564
1	M1 UpD0 UpD6 Quiescence Vesicle SerumResponse	GDPD5	98.9899	10.0498	8.8386	9.04447	8.31579	8.22947	8.09282	9.29835	8.36122	8.12907	8.28308	8.17415	8.17922	8.02717	8.20315	8.1175	8.05575	8.63025	8.31165	8.3657	8.71702	8.25401	8.32027	8.85576	8.3202
1	M1 UpD0 UpD6 Quiescence Vesicle SerumResponse	H1FX	98.9899	9.74423	10.0564	9.67859	8.59312	8.82953	8.63345	9.94347	8.60993	8.54217	8.70412	8.58138	8.2789	8.28651	8.315	8.13055	8.24915	8.77934	8.30591	8.79147	9.49888	8.65047	9.11776	10.0496	8.92884
1	M1 UpD0 UpD6 Quiescence Vesicle SerumResponse	HCLS1	98.9899	13.1711	13.6846	13.2833	12.8866	13.3427	13.0524	13.4208	13.2851	13.0654	12.7923	13.5503	13.2795	12.8363	13.4566	13.146	12.9387	13.6755	13.4138	12.8555	13.5069	13.3755	13.1052	13.5888	13.3017
1	M1 UpD0 UpD6 Quiescence Vesicle SerumResponse	HDAC6	98.9899	9.81611	10.1229	9.82437	9.08707	9.44871	9.23547	9.94525	9.39914	9.21468	9.00819	9.39475	9.16235	9.08021	9.74854	9.35926	9.02218	9.61143	9.41757	8.92199	9.7668	9.39914	9.39814	10.0964	9.49772
1	M1 UpD0 UpD6 Quiescence Vesicle SerumResponse	HIC2	98.9899	9.5889	9.23391	9.52355	8.91339	9.03409	8.83667	9.26659	9.18415	9.08124	9.22955	9.32294	9.04746	9.15172	9.23076	9.01874	9.24237	9.33452	9.20096	9.37546	9.2207	9.20173	9.21569	9.27017	9.28284
1	M1 UpD0 UpD6 Quiescence Vesicle SerumResponse	HLA-A	98.9899	12.7861	12.3983	12.5051	11.3426	11.1372	11.6251	12.8091	11.2821	11.9051	11.7691	11.0093	11.4384	11.7013	11.4466	11.7086	11.6461	12.1447	12.111	11.8583	11.8974	12.3307	12.5315	11.928	12.8363
1	M1 UpD0 UpD6 Quiescence Vesicle SerumResponse	HLA-E	98.9899	13.8558	13.8635	14.1653	13.1525	12.6966	13.0866	14.1091	12.8981	13.2168	13.103	13.1096	13.0691	12.768	13.1052	12.8299	12.922	13.4074	13.3881	13.1525	13.8048	13.5201	13.7058	13.9396	13.7896
1	M1 UpD0 UpD6 Quiescence Vesicle SerumResponse	HPCAL1	98.9899	12.3329	12.3155	12.1791	11.4732	11.6941	11.4891	11.9059	10.8263	10.6184	10.6561	11.0894	10.8019	11.2557	11.7064	11.0505	11.2619	11.6452	10.9193	11.519	12.111	11.4297	12.4154	12.3133	11.787
1	M1 UpD0 UpD6 Quiescence Vesicle SerumResponse	HS.126108	98.9899	8.6595	8.77539	8.78966	8.51771	8.55827	8.47894	9.15753	8.69067	8.40431	8.50103	8.55451	8.38038	8.51557	8.60856	8.44189	8.40373	8.63415	8.37889	8.71274	9.05795	8.45148	9.20606	9.21295	9.4772
1	M1 UpD0 UpD6 Quiescence Vesicle SerumResponse	HS.442504	98.9899	9.21203	8.77173	8.47027	8.39158	8.30866	8.17152	9.88115	8.25096	8.26864	8.3206	8.37954	8.40807	8.23203	8.2565	8.24904	8.24052	8.42481	8.3226	8.34305	8.56761	8.36806	8.3997	8.57355	8.38378
1	M1 UpD0 UpD6 Quiescence Vesicle SerumResponse	HSPA7	98.9899	9.85947	8.63393	8.94114	8.40941	8.40952	8.22705	8.71773	8.46952	8.35226	8.30819	8.26204	8.3985	8.53456	8.31574	8.32245	8.36107	8.507	8.48305	8.77425	8.62182	8.41834	8.94094	8.86781	8.52322
1	M1 UpD0 UpD6 Quiescence Vesicle SerumResponse	IGF1R	98.9899	8.9776	8.69891	9.02352	8.28694	8.67585	8.42816	9.66285	8.50411	8.45331	8.44306	8.36429	8.34149	8.3681	8.51841	8.31036	8.49552	8.42887	8.41485	8.46551	8.89918	8.44552	8.81164	9.19319	8.84332
1	M1 UpD0 UpD6 Quiescence Vesicle SerumResponse	INTS1	98.9899	10.4077	10.2925	10.0309	9.53655	9.83072	9.37075	11.0433	10.1239	9.67047	9.56128	10.1227	9.71325	9.68132	10.2856	9.88285	9.74802	10.2852	9.77454	9.75777	10.4054	9.79621	9.63922	10.3834	9.73631
1	M1 UpD0 UpD6 Quiescence Vesicle SerumResponse	IRF3	98.9899	10.2249	10.2726	10.0498	9.72734	9.85222	9.41009	10.3526	9.88358	9.29974	9.33349	9.97844	9.42865	9.46625	10.1436	9.47775	9.42052	10.2253	9.70661	9.58321	10.4043	9.91685	9.63566	10.3477	9.78404
1	M1 UpD0 UpD6 Quiescence Vesicle SerumResponse	ISCU	98.9899	12.3648	12.1047	11.8462	10.6259	10.4757	10.3586	11.3007	10.6179	10.2356	10.5756	10.8726	10.5315	10.8433	10.8887	10.5074	10.8418	11.1337	10.5635	11.1334	11.3455	11.0647	11.2062	11.5768	11.3636
1	M1 UpD0 UpD6 Quiescence Vesicle SerumResponse	LAPTM4A	98.9899	9.30893	9.55148	9.52009	9.14295	8.73205	9.14186	10.396	8.81124	9.15088	9.18901	8.98695	9.12441	9.10635	9.21738	9.11197	9.07535	9.10506	9.1194	9.50198	9.27432	9.42717	9.65568	9.93909	9.57026
1	M1 UpD0 UpD6 Quiescence Vesicle SerumResponse	LOC100129907	98.9899	10.7171	10.874	10.6979	8.68539	8.79078	8.90912	8.90166	8.5332	8.61474	8.58834	8.71606	8.5289	8.58482	9.01184	8.94477	8.71434	9.15278	9.11822	8.77768	9.08585	8.78884	8.97284	9.07121	9.07579
1	M1 UpD0 UpD6 Quiescence Vesicle SerumResponse	LOC100130623	98.9899	8.89571	9.04808	8.96259	8.61648	8.69685	8.73394	9.50967	8.43903	8.46711	8.45824	8.44359	8.52966	8.56894	8.44658	8.55047	8.52578	8.61404	8.48107	8.62535	8.93471	8.50789	9.14824	9.27721	8.93434
1	M1 UpD0 UpD6 Quiescence Vesicle SerumResponse	LOC100133008	98.9899	10.3775	10.5261	10.2299	9.2349	9.3409	8.8847	9.67966	9.12559	9.04114	8.93415	9.2356	8.97968	9.07974	9.01863	8.93471	8.9878	9.08442	8.97587	9.21768	9.23533	9.24452	9.36515	9.22474	9.1511
1	M1 UpD0 UpD6 Quiescence Vesicle SerumResponse	LOC146517	98.9899	10.2784	10.3878	10.4382	9.40261	9.59529	9.66914	10.4276	9.72879	9.77582	9.77136	9.65871	9.52063	9.63178	9.6477	9.67919	10.0097	9.84704	9.73199	10.1123	10.1138	10.1753	10.1911	10.5226	10.535
1	M1 UpD0 UpD6 Quiescence Vesicle SerumResponse	LOC400890	98.9899	10.3927	10.2332	10.0505	9.84059	9.75336	9.64652	10.3072	9.91523	9.94897	9.89967	9.90923	9.79796	9.6344	9.86925	9.54335	9.9454	10.0957	9.77778	10.0154	9.97599	9.96594	10.147	10.1063	10.0661
1	M1 UpD0 UpD6 Quiescence Vesicle SerumResponse	LOC440341	98.9899	9.96664	9.87023	10.2769	9.15172	9.68332	9.36346	9.96797	9.82786	9.24035	9.02828	9.63178	9.42066	8.94156	9.44685	9.22521	8.74557	9.54514	9.30149	9.07363	9.63382	9.43698	9.27355	10.1004	10.1417
1	M1 UpD0 UpD6 Quiescence Vesicle SerumResponse	LOC441268	98.9899	10.123	9.03815	8.95979	8.25935	8.20207	8.11342	8.53875	8.15666	8.45576	8.30614	8.13962	8.17675	8.35959	8.29027	8.15513	8.32105	8.2738	8.19813	8.29697	8.28233	8.36963	8.88127	8.52528	8.38458
1	M1 UpD0 UpD6 Quiescence Vesicle SerumResponse	LOC442609	98.9899	9.37253	9.77104	9.29273	8.90741	8.84484	8.96301	9.34514	8.87513	8.85237	8.81682	8.85699	8.89856	8.91084	9.02871	9.228	8.96184	9.31353	9.07707	9.25318	9.02871	9.00892	9.08673	9.14749	9.04941
1	M1 UpD0 UpD6 Quiescence Vesicle SerumResponse	LOC653438	98.9899	9.68609	9.60686	9.60269	9.2588	9.22846	9.19058	9.69352	9.34377	9.31942	9.00567	9.39321	9.15034	9.00536	9.60023	9.30795	9.07016	9.62546	9.42203	9.15573	9.69368	9.56221	9.1126	9.3273	9.39661
1	M1 UpD0 UpD6 Quiescence Vesicle SerumResponse	LOC729660	98.9899	9.46763	9.28244	9.61839	9.32148	9.30856	9.08925	11.926	9.31436	8.9364	8.94962	9.44776	8.88694	8.84774	9.02699	8.94877	8.78753	9.08239	9.033	9.21331	9.3101	8.95909	9.52826	9.49948	9.14096
1	M1 UpD0 UpD6 Quiescence Vesicle SerumResponse	LOC730994	98.9899	9.76737	9.80566	9.79118	8.44239	8.80502	8.52554	8.89476	8.63118	8.4269	8.35142	8.57058	8.48216	8.13678	8.69089	8.45351	8.33033	8.79129	8.54614	8.46901	8.81809	8.60429	8.57844	9.15957	8.66334
1	M1 UpD0 UpD6 Quiescence Vesicle SerumResponse	LSM10	98.9899	11.1209	11.6934	11.0857	10.1524	10.1602	10.0713	10.7503	10.2266	9.86465	10.0538	10.3507	10.1198	9.95274	10.2449	10.0698	10.1864	10.4025	10.0839	10.2612	10.4043	10.3165	10.2645	10.4131	10.1217
1	M1 UpD0 UpD6 Quiescence Vesicle SerumResponse	LSM14A	98.9899	12.5656	12.6894	12.6879	11.3526	11.6255	11.6973	11.944	11.5593	11.3165	11.3145	11.7738	11.3921	11.5108	11.7712	11.5553	11.4233	11.7351	11.4294	11.5182	11.7023	11.5373	11.5853	11.9166	11.5135
1	M1 UpD0 UpD6 Quiescence Vesicle SerumResponse	MAP4K1	98.9899	12.2601	11.9934	12.1289	10.9887	11.2283	10.8451	12.3968	11.2291	10.9533	10.6336	11.3126	11.0219	10.9134	11.6646	11.56	11.0211	11.9648	11.8148	11.179	11.8204	11.7276	10.9221	11.5109	11.4676
1	M1 UpD0 UpD6 Quiescence Vesicle SerumResponse	MIR7-3HG	98.9899	8.91674	9.35487	9.05244	8.44958	8.47957	8.33267	9.25112	8.45698	8.33094	8.36323	8.37601	8.37065	8.27191	8.52911	8.36238	8.34932	8.62595	8.22935	8.43965	8.59619	8.39361	8.54363	8.53875	8.46223
1	M1 UpD0 UpD6 Quiescence Vesicle SerumResponse	NBAS	98.9899	9.37814	9.38915	9.00431	8.75046	8.94156	8.83728	10.4832	8.60214	8.66577	8.72909	8.76766	8.60285	8.58263	8.83659	8.5737	8.69916	8.96735	8.65714	8.90408	9.16068	8.90354	8.98521	9.21738	9.00253
1	M1 UpD0 UpD6 Quiescence Vesicle SerumResponse	NCF4	98.9899	10.4205	10.0729	10.373	8.82278	9.04165	9.04671	10.0011	9.69825	9.03099	9.02318	9.76058	9.38492	9.24619	10.1106	9.74614	9.32546	10.2888	10.1053	9.67472	10.3194	9.82375	9.93984	10.0561	9.73691
1	M1 UpD0 UpD6 Quiescence Vesicle SerumResponse	NPIPB11	98.9899	12.9781	12.3553	12.7662	11.8009	12.1437	11.5971	13.6636	12.3027	11.6491	11.4585	11.9695	11.4876	11.4724	11.8689	11.7964	11.3845	12.1386	11.7843	11.6338	12.2774	11.7552	11.841	12.5794	12.3529
1	M1 UpD0 UpD6 Quiescence Vesicle SerumResponse	NPIPB12	98.9899	13.0905	12.4226	12.72	11.9008	12.2599	11.8034	12.963	12.2074	11.8798	11.4847	12.2925	11.679	11.5957	12.2443	12.0029	11.4591	12.2195	12.0489	11.8064	12.4167	12.0222	12.0135	12.5904	12.3293
1	M1 UpD0 UpD6 Quiescence Vesicle SerumResponse	NPIPB13	98.9899	12.413	11.826	11.8984	11.3777	11.6947	11.193	12.3496	11.6564	11.3094	10.8887	11.7611	11.0402	11.2462	11.6738	11.5187	11.1879	11.6179	11.5744	11.3637	11.7598	11.3197	11.4562	11.9405	11.489
1	M1 UpD0 UpD6 Quiescence Vesicle SerumResponse	NPIPB2	98.9899	14.0455	13.5433	13.574	13.1502	13.5245	13.0244	13.4002	13.4253	13.1694	12.5024	13.6247	12.8392	13.0709	13.481	13.2851	13.1871	13.5778	13.4591	13.1325	13.5644	13.1608	13.2408	13.6475	13.103
1	M1 UpD0 UpD6 Quiescence Vesicle SerumResponse	NPIPB3	98.9899	13.8779	13.4317	13.4768	12.9983	13.2679	12.7099	13.6987	13.2209	12.9016	12.3798	13.3845	12.6216	12.9378	13.235	13.1711	12.8043	13.4047	13.2288	12.8105	13.1957	12.8134	13.0184	13.3324	12.9834
1	M1 UpD0 UpD6 Quiescence Vesicle SerumResponse	NPIPB5	98.9899	11.7892	10.8745	11.1668	10.5031	10.855	10.2603	12.0489	10.69	10.459	10.0162	10.879	10.1441	10.1978	10.8358	10.4871	10.2122	10.9866	10.5979	10.5379	11.0678	10.5451	10.5826	11.3544	10.8505
1	M1 UpD0 UpD6 Quiescence Vesicle SerumResponse	OAS1	98.9899	9.26045	9.1931	9.49986	8.87666	8.67098	8.76772	8.98863	8.68807	8.41876	8.70341	8.56802	8.4991	8.70633	9.09815	8.50311	8.7035	9.82408	9.29946	9.05234	9.92363	9.39861	8.97642	9.63194	9.64877
1	M1 UpD0 UpD6 Quiescence Vesicle SerumResponse	ORMDL3	98.9899	9.65153	9.28172	9.43269	8.77858	8.50193	8.75102	9.27596	8.76808	8.81891	8.94575	8.84855	8.77501	9.13562	9.05176	8.85772	8.92346	9.02071	9.02187	9.10782	9.31916	9.08021	9.21791	9.42913	9.01684
1	M1 UpD0 UpD6 Quiescence Vesicle SerumResponse	PEPD	98.9899	11.0443	11.3771	10.8496	10.2974	10.68	10.377	11.7712	10.8641	10.5317	10.3666	10.9367	10.7888	10.2797	11.0491	10.7034	10.3123	11.1015	10.6037	10.5261	11.1743	10.8348	10.331	11.4378	10.9498
1	M1 UpD0 UpD6 Quiescence Vesicle SerumResponse	PIGS	98.9899	9.59972	9.90643	9.38573	9.00453	9.1674	9.02343	10.1361	9.2783	9.07742	8.90195	9.23294	9.25803	9.25679	9.49456	9.34332	9.27474	9.34583	9.31728	9.31559	9.38321	9.49284	8.87878	9.28007	9.21295
1	M1 UpD0 UpD6 Quiescence Vesicle SerumResponse	PLEKHM1	98.9899	9.40144	9.46777	9.30564	8.38936	8.45987	8.40294	9.99417	8.82414	8.76268	8.63719	8.72784	8.87676	8.5188	9.0301	9.03966	8.52694	9.0495	8.9024	8.73068	9.17777	8.92634	8.69784	9.14768	9.08124
1	M1 UpD0 UpD6 Quiescence Vesicle SerumResponse	PNOC	98.9899	10.8757	11.0991	10.9114	9.35753	9.21543	9.29974	10.2621	9.0749	9.05348	9.4245	9.22497	9.08002	9.41563	9.35648	9.21458	9.41233	9.82708	9.37188	9.68171	10.6259	9.89191	10.4745	11.184	10.6632
1	M1 UpD0 UpD6 Quiescence Vesicle SerumResponse	POU6F1	98.9899	8.81547	8.53377	8.77173	8.34181	8.24332	8.25576	8.91007	8.24037	8.1752	8.20721	8.28014	8.19577	8.20387	8.19324	8.27217	8.27187	8.20249	8.18085	8.16884	8.39401	8.25461	8.36008	8.44419	8.27417
1	M1 UpD0 UpD6 Quiescence Vesicle SerumResponse	PPBP	98.9899	9.89022	9.50848	10.5595	8.22067	8.38743	8.32596	9.45191	8.36911	8.5018	8.7396	8.37007	8.53232	8.50009	8.51049	8.23849	8.42567	8.70608	8.34852	8.58823	8.84973	8.51515	8.80502	9.42587	8.91122
1	M1 UpD0 UpD6 Quiescence Vesicle SerumResponse	PRKCSH	98.9899	11.4724	11.4855	11.3642	10.1566	10.3103	10.2592	11.664	10.6073	10.4361	10.3142	10.5894	10.4307	10.0877	10.6677	10.4052	10.1572	10.5662	10.3464	10.5974	11.1245	10.7362	10.905	11.3945	11.2323
1	M1 UpD0 UpD6 Quiescence Vesicle SerumResponse	PTK2B	98.9899	10.6465	10.9946	10.5603	9.22136	9.21738	9.15642	10.255	9.01597	9.01122	8.90536	9.0229	8.9989	9.15753	9.4738	9.28789	9.05795	9.61633	9.64485	9.17796	9.81299	9.73187	9.49587	10.0794	9.91009
1	M1 UpD0 UpD6 Quiescence Vesicle SerumResponse	PTPRCAP	98.9899	12.2558	12.3997	12.3562	10.4617	10.7551	10.8427	13.4361	11.6019	10.9666	10.5329	11.7691	11.493	10.7181	11.9613	11.6776	10.8822	11.9889	11.8424	11.0371	12.0906	11.7933	11.373	11.7909	11.8405
1	M1 UpD0 UpD6 Quiescence Vesicle SerumResponse	RAB24	98.9899	10.471	10.4948	10.4576	9.72015	9.84269	9.54773	10.0166	9.59727	9.35158	9.34222	9.71855	9.40193	9.4115	9.9183	9.59853	9.52355	10.1302	10.004	10.0159	10.615	10.3239	10.2206	10.8814	10.4337
1	M1 UpD0 UpD6 Quiescence Vesicle SerumResponse	RAD17	98.9899	8.83604	8.70828	8.75564	8.36442	8.44881	8.48637	10.1941	8.54011	8.42711	8.43903	8.53005	8.51909	8.38981	8.3932	8.4165	8.61526	8.56015	8.35124	8.66893	8.64477	8.59017	8.84877	9.00011	9.01927
1	M1 UpD0 UpD6 Quiescence Vesicle SerumResponse	RAD9A	98.9899	9.23052	9.42865	9.2912	8.61359	9.07186	8.58153	9.24269	9.29111	8.84926	8.62686	9.37437	8.93029	8.8902	9.67859	9.10557	8.97579	9.61164	8.9721	9.16027	9.80447	9.15326	9.01272	9.65662	9.07409
1	M1 UpD0 UpD6 Quiescence Vesicle SerumResponse	RBM6	98.9899	11.3697	10.6031	10.9859	10.1735	10.1914	9.97978	10.2933	10.109	9.98741	9.99981	10.0159	9.94814	9.97516	10.1859	10.1106	9.93742	10.183	10.2736	10.2076	10.5341	10.0812	10.4689	10.7809	10.3394
1	M1 UpD0 UpD6 Quiescence Vesicle SerumResponse	RHOBTB2	98.9899	10.1123	9.98608	9.8491	8.36494	8.26035	8.20139	10.1163	8.33228	8.2781	8.25034	8.2188	8.3145	8.28558	8.45808	8.4092	8.26505	8.37829	8.46106	8.34662	8.45506	8.32392	8.22366	8.48811	8.33745
1	M1 UpD0 UpD6 Quiescence Vesicle SerumResponse	RHOQ	98.9899	12.5163	11.9546	12.15	11.5516	11.7232	11.5884	12.539	10.8326	11.5605	11.2848	11.1583	10.8986	11.4868	11.4503	11.6625	11.6143	11.8958	12.2195	11.9712	12.66	12.4997	12.4335	12.8442	12.4892
1	M1 UpD0 UpD6 Quiescence Vesicle SerumResponse	RPL13AP20	98.9899	11.8798	11.6251	11.8195	11.2784	11.1384	11.0962	11.5568	11.0423	10.9784	11.035	11.0421	10.8667	10.9154	11.1799	10.9144	10.8988	11.6019	11.0109	11.3407	11.8697	11.3159	12.11	12.0836	11.8503
1	M1 UpD0 UpD6 Quiescence Vesicle SerumResponse	SAT2	98.9899	10.1893	10.4978	10.4944	9.39901	9.10231	9.5612	10.0527	9.58349	9.79623	9.23076	9.39738	9.75071	9.3397	9.45678	9.55579	9.34013	9.50109	9.39671	9.84355	9.65168	9.64756	10.1268	9.79833	9.93619
1	M1 UpD0 UpD6 Quiescence Vesicle SerumResponse	SEC31B	98.9899	8.63061	8.72086	8.39958	8.21178	8.3693	8.04609	8.30902	8.17778	8.03517	8.06091	8.00866	8.02734	8.12825	8.16767	8.16207	8.12714	8.22009	7.97458	8.16825	8.44847	8.02822	8.23968	8.4198	8.20081
1	M1 UpD0 UpD6 Quiescence Vesicle SerumResponse	SEPT1	98.9899	8.87347	8.78745	8.85291	8.60681	8.6103	8.59039	8.67496	8.67222	8.51998	8.43891	8.62314	8.53598	8.56705	8.78188	8.72106	8.59393	9.11177	9.06997	8.77733	9.1693	8.86006	8.88907	9.14888	8.84729
1	M1 UpD0 UpD6 Quiescence Vesicle SerumResponse	SERPINI1	98.9899	8.77888	9.16402	9.03295	8.47801	8.24772	8.46988	8.58327	8.36962	8.38744	8.34947	8.30283	8.51853	8.36058	8.28173	8.30934	8.46552	8.27096	8.33213	8.87244	8.48606	8.75782	9.07819	8.91851	9.12261
1	M1 UpD0 UpD6 Quiescence Vesicle SerumResponse	SETBP1	98.9899	11.1736	11.2241	11.0619	9.65687	10.1914	10.0146	10.1429	9.73244	9.8531	9.29063	10.389	9.96728	9.62697	10.3824	10.6873	9.74719	10.6819	10.7395	9.87485	10.5835	10.6029	10.2347	10.768	10.8272
1	M1 UpD0 UpD6 Quiescence Vesicle SerumResponse	SGSM3	98.9899	9.59647	9.83002	9.43533	8.57337	8.86489	8.71888	10.5483	9.03704	8.5884	8.56321	8.92091	8.70107	8.66548	8.77572	8.75765	8.46315	8.94177	8.72595	8.62036	9.2075	8.87409	8.83209	9.34479	8.86682
1	M1 UpD0 UpD6 Quiescence Vesicle SerumResponse	SH3GLB2	98.9899	12.1367	12.2173	11.9641	10.8462	11.1499	10.8755	12.6937	11.4031	10.9114	10.9179	11.3927	10.9493	10.8447	11.4294	11.206	10.9503	11.5934	11.1127	11.2415	11.8707	11.4789	11.4497	12.0327	11.5674
1	M1 UpD0 UpD6 Quiescence Vesicle SerumResponse	SIT1	98.9899	9.0748	9.26137	9.01184	8.44102	8.26075	8.49935	10.0086	8.28042	8.27135	8.36126	8.49475	8.49366	8.18122	8.50215	8.57023	8.35437	8.78348	8.68106	8.6699	8.73422	8.94717	8.83439	8.75564	8.8555
1	M1 UpD0 UpD6 Quiescence Vesicle SerumResponse	SKIV2L	98.9899	11.2278	10.9952	10.9698	10.4526	10.7537	10.3763	11.6633	10.7779	10.5417	10.3444	10.7362	10.3297	10.4101	11.0551	10.7281	10.5379	10.9965	10.6069	10.8735	11.1928	10.6225	10.6775	11.258	10.7029
1	M1 UpD0 UpD6 Quiescence Vesicle SerumResponse	SLC25A45	98.9899	8.81793	8.7578	8.63957	8.62333	8.61482	8.40259	8.79325	8.42988	8.36952	8.48606	8.21084	8.29431	8.23164	8.29869	8.41476	8.46717	8.49271	8.55864	8.54416	8.8588	8.5953	9.03133	8.87598	8.55245
1	M1 UpD0 UpD6 Quiescence Vesicle SerumResponse	SLC37A1	98.9899	9.66425	9.68209	9.57517	9.02938	9.05784	9.22208	10.7565	8.48903	9.04902	8.79792	8.48448	8.63421	8.64105	8.56603	8.95393	8.7578	8.76563	8.89665	9.10592	9.44245	9.02187	9.21892	9.62651	8.98075
1	M1 UpD0 UpD6 Quiescence Vesicle SerumResponse	SNRNP70	98.9899	11.7434	10.9836	11.3558	10.7754	11.1845	10.6014	12.0965	11.2749	10.8023	10.5686	11.0081	10.6201	11.0081	11.4384	11.0944	10.7831	11.3914	11.1113	10.836	11.516	11.0093	10.35	11.4544	10.8952
1	M1 UpD0 UpD6 Quiescence Vesicle SerumResponse	SNRPN	98.9899	11.6656	11.7917	11.3985	10.6205	10.9501	10.733	12.2631	10.8632	10.5126	10.6141	10.7138	10.366	10.2607	10.7151	10.06	10.4478	10.7945	10.3338	11.1212	11.4536	10.6304	11.5787	11.5689	10.8896
1	M1 UpD0 UpD6 Quiescence Vesicle SerumResponse	TAZ	98.9899	9.08052	9.04037	8.85603	8.54963	8.79427	8.30754	9.46805	8.57616	8.46388	8.32375	8.59521	8.41688	8.32358	8.78	8.56642	8.47101	8.90466	8.38157	8.36727	8.81324	8.60012	8.46175	8.99533	8.47133
1	M1 UpD0 UpD6 Quiescence Vesicle SerumResponse	TBCC	98.9899	9.02567	9.43698	9.33834	8.80686	8.9213	8.85639	9.73313	8.93806	8.72836	8.85317	9.02463	8.94323	8.91379	8.99869	8.77332	8.99494	9.02071	8.85831	9.23437	9.09364	8.97342	9.44634	8.86441	9.01976
1	M1 UpD0 UpD6 Quiescence Vesicle SerumResponse	TBL1X	98.9899	10.7807	10.6095	10.4452	9.54107	9.41743	9.25868	10.9467	9.48449	9.44849	9.32577	9.12745	8.99458	8.70772	8.91883	8.64816	8.79334	9.2922	8.71733	9.54625	10.0176	9.09719	10.1174	10.381	9.47107
1	M1 UpD0 UpD6 Quiescence Vesicle SerumResponse	TM7SF3	98.9899	9.99559	9.75308	9.89125	9.29072	9.67687	9.19698	9.90972	9.56221	9.36598	9.2912	9.48018	9.34401	9.64638	9.63764	9.61189	9.44923	9.62115	9.64652	9.66175	10.0795	9.58786	9.80951	10.3385	9.87485
1	M1 UpD0 UpD6 Quiescence Vesicle SerumResponse	TPT1	98.9899	13.7235	13.3285	13.2595	12.9558	13.0398	12.8043	13.2956	12.7648	12.5427	12.7732	12.7797	12.4949	12.5442	12.6186	12.4949	12.4384	13.1748	12.5112	12.963	13.3556	12.9158	13.3984	13.2304	13.0307
1	M1 UpD0 UpD6 Quiescence Vesicle SerumResponse	TRADD	98.9899	10.0124	10.2824	9.942	9.33652	9.30137	9.09279	10.5359	9.17633	9.02361	8.87539	9.20348	9.03824	8.94639	9.50472	9.12404	8.9665	9.3278	9.17045	9.04284	9.60944	9.37231	9.37828	9.83069	9.50429
1	M1 UpD0 UpD6 Quiescence Vesicle SerumResponse	TTC17	98.9899	10.0665	9.75441	9.817	9.10037	9.44814	8.91497	9.24104	9.08486	8.89999	8.78266	9.02118	8.83383	8.9694	9.17402	8.96684	9.00453	9.11404	9.20909	9.06709	9.47528	9.15899	9.54005	9.65687	9.43834
1	M1 UpD0 UpD6 Quiescence Vesicle SerumResponse	TTLL3	98.9899	9.37304	9.19597	9.473	8.7831	8.8075	8.66852	9.33568	8.67045	8.65757	8.49403	8.60985	8.4025	8.53304	8.95794	8.77318	8.5589	8.88075	9.02451	8.83894	9.11154	8.83218	9.30948	9.76309	9.18544
1	M1 UpD0 UpD6 Quiescence Vesicle SerumResponse	TUBG2	98.9899	8.94094	8.7651	8.73793	8.40518	8.41867	8.35178	8.5238	8.37201	8.36802	8.38831	8.3122	8.41463	8.37598	8.43101	8.30597	8.35458	8.47516	8.44271	8.70828	8.78991	8.43655	9.2232	9.09731	8.56421
1	M1 UpD0 UpD6 Quiescence Vesicle SerumResponse	TYK2	98.9899	12.4483	12.2443	12.2162	11.4579	11.6949	11.3016	12.7845	11.8613	11.2557	11.1302	11.8415	11.416	11.5509	12.068	11.8405	11.4084	12.108	11.7712	11.5674	12.264	11.6422	11.5957	12.3471	11.6937
1	M1 UpD0 UpD6 Quiescence Vesicle SerumResponse	UBQLN1	98.9899	11.5853	11.4901	11.5365	11.054	11.1428	11.1282	11.2343	11.1321	10.92	10.8447	11.0875	10.9498	10.7458	11.1384	11.0081	11.0655	11.1028	11.0181	11.0428	11.1748	11.2223	11.1494	11.301	11.2957
1	M1 UpD0 UpD6 Quiescence Vesicle SerumResponse	VAV1	98.9899	10.6022	10.1406	10.3941	9.66655	9.54514	9.67659	9.97467	9.57882	9.70581	9.23463	9.56235	9.78329	9.35953	9.94632	10.1383	9.31995	10.0648	10.1605	9.84269	10.1036	10.2211	9.34066	10.1184	10.1185
1	M1 UpD0 UpD6 Quiescence Vesicle SerumResponse	VPS28	98.9899	10.7886	10.9043	10.6137	9.8324	9.70495	9.6231	11.4129	9.83991	9.54244	9.76843	9.84746	9.64059	9.74117	10.0222	9.60172	9.70662	9.97635	9.67669	9.85704	10.2734	9.74079	10.2281	10.3403	9.94204
1	M1 UpD0 UpD6 Quiescence Vesicle SerumResponse	XKR6	98.9899	9.34502	9.07604	9.08402	8.54126	8.62177	8.64464	9.46473	8.80618	8.75392	8.48005	8.60985	8.58855	8.48548	8.67105	8.96392	8.55402	8.76427	8.71072	8.78485	8.82385	8.73773	9.39786	9.01587	9.01715
1	M1 UpD0 UpD6 Quiescence Vesicle SerumResponse	ZNF106	98.9899	11.2905	11.0132	10.9085	10.4794	10.738	10.5257	10.7722	10.6708	10.3103	10.4264	10.49	10.5011	10.32	10.6032	10.4592	10.4047	10.8025	10.508	10.368	10.7057	10.5774	10.4287	10.8236	10.5707
1	M1 UpD0 UpD6 Quiescence Vesicle SerumResponse	ZNF133	98.9899	9.19922	9.09935	9.06287	8.75579	8.92838	8.60936	9.09794	8.96452	8.65992	8.54768	9.0021	8.69264	8.58803	8.5261	8.63973	8.51304	8.64233	8.59055	8.73358	8.64129	8.60174	8.97968	9.13093	8.8555
1	M1 UpD0 UpD6 Quiescence Vesicle SerumResponse	ZNF331	98.9899	9.38292	9.42436	9.30509	9.22835	9.33661	9.29946	9.56134	9.07363	9.30272	9.2004	9.12966	9.08718	8.98428	9.08278	8.94458	9.06994	9.14907	8.92969	9.26352	9.60152	9.25716	9.87284	10.5001	9.78899
1	M1 UpD0 UpD6 Quiescence Vesicle SerumResponse	ZNF692	98.9899	9.1458	9.09078	8.984	8.7969	9.0633	8.46531	10.135	9.05688	8.44908	8.50849	8.77018	8.59525	8.57715	8.90816	8.56008	8.57752	8.8847	8.70284	8.63479	9.10528	8.65803	8.62272	9.17703	8.68618
1	M1 UpD0 UpD6 Quiescence Vesicle SerumResponse	C17orf100	97.9798	9.21162	9.74359	9.16943	8.47234	8.55105	8.31362	8.94308	8.46278	8.35495	8.63139	8.54194	8.40428	8.46229	8.47363	8.32042	8.40608	8.43325	8.39104	8.48751	8.47796	8.35447	8.70625	8.45423	8.51538
1	M1 UpD0 UpD6 Quiescence Vesicle SerumResponse	CASTOR1	97.9798	8.87216	8.7569	8.85392	8.3826	8.40841	8.29355	9.60874	8.53291	8.11524	8.35208	8.41451	8.4025	8.40321	8.66513	8.43565	8.38059	8.56178	8.38194	8.41842	8.64129	8.31989	8.38672	8.61818	8.34846
1	M1 UpD0 UpD6 Quiescence Vesicle SerumResponse	CHMP4B	97.9798	10.8321	10.777	10.8252	10.3342	10.3372	10.2512	11.2401	10.5611	10.326	10.7495	10.5371	10.2919	10.4364	10.4214	10.2807	10.1791	10.4964	10.3951	10.2217	10.514	10.4356	10.1277	10.6493	10.5682
1	M1 UpD0 UpD6 Quiescence Vesicle SerumResponse	CTRL	97.9798	8.84637	9.03209	9.08755	8.29979	8.28195	8.37004	8.98521	8.65561	8.46962	8.65784	8.5941	8.48606	8.41529	8.59118	8.66975	8.48342	8.94003	8.56907	8.81682	8.82293	8.56672	8.49391	8.87324	8.65382
1	M1 UpD0 UpD6 Quiescence Vesicle SerumResponse	DGAT1	97.9798	9.61385	9.89984	9.50939	8.5937	8.94802	8.64513	9.93987	9.08486	8.65299	8.69866	9.1707	8.94271	8.86167	9.18947	9.0454	8.88388	9.13747	8.7776	8.82206	9.43582	9.03533	8.86441	9.42676	9.07198
1	M1 UpD0 UpD6 Quiescence Vesicle SerumResponse	EHMT2	97.9798	9.04637	9.29739	8.82322	8.54028	8.35253	8.44171	10.1284	8.54935	8.61497	8.54752	8.84992	8.58214	8.56399	8.681	8.61566	8.50555	8.81864	8.3647	8.66153	8.72303	8.71305	8.43928	8.80579	8.73673
1	M1 UpD0 UpD6 Quiescence Vesicle SerumResponse	ICA1L	97.9798	10.3838	9.76388	10.0961	9.02032	9.15789	9.44702	9.88896	9.63285	9.55608	8.95576	9.40408	9.47359	9.355	9.5014	9.71568	8.99435	9.37976	9.65153	9.2207	9.69424	9.55351	9.53963	9.65731	9.45831
1	M1 UpD0 UpD6 Quiescence Vesicle SerumResponse	ILF3	97.9798	11.3074	11.1318	11.1269	10.0193	10.4157	10.0677	10.8247	10.7377	10.4303	10.2211	10.5172	10.332	10.3963	10.6346	10.6295	10.4164	10.6986	10.5155	10.5098	10.5804	10.7744	10.1008	10.7348	10.4549
1	M1 UpD0 UpD6 Quiescence Vesicle SerumResponse	KRT10	97.9798	10.7599	11.1045	10.7754	10.2915	10.2157	10.1463	10.9575	10.2359	10.1477	10.5266	10.375	10.1368	10.3389	10.2045	10.0971	10.3266	10.4218	10.015	10.7181	10.5467	10.2741	10.9056	10.6863	10.457
1	M1 UpD0 UpD6 Quiescence Vesicle SerumResponse	LOC728565	97.9798	10.2073	9.64609	9.61866	8.95827	9.08593	8.83913	9.26516	9.17339	9.14896	8.96735	9.01684	9.02431	9.14237	9.27317	9.25488	8.95416	9.23827	9.20973	9.15264	9.15135	9.05666	9.44206	9.11739	9.00922
1	M1 UpD0 UpD6 Quiescence Vesicle SerumResponse	MAU2	97.9798	9.88719	10.1705	9.73007	8.40079	9.235	8.63153	10.1586	9.26086	8.7882	8.82988	9.46051	8.88989	8.7575	9.30257	8.78026	8.81646	9.24571	8.80446	8.74241	9.36774	8.84467	8.89184	9.25933	9.00633
1	M1 UpD0 UpD6 Quiescence Vesicle SerumResponse	MOB3C	97.9798	10.7048	10.3742	10.2643	9.51551	9.39363	9.11142	9.6696	9.26452	9.25169	9.79882	9.41123	9.37315	9.49175	9.35591	9.12966	9.46281	9.26045	9.23584	9.70377	9.50071	9.33591	9.89057	9.50311	9.54196
1	M1 UpD0 UpD6 Quiescence Vesicle SerumResponse	NADK	97.9798	9.12393	9.01035	9.06267	8.45238	8.57784	8.40116	9.53723	8.8385	8.52634	8.61404	8.97662	8.78266	8.51395	8.84428	8.91103	8.58167	9.06696	8.73007	8.62439	8.99931	8.85639	8.47034	8.99076	8.81636
1	M1 UpD0 UpD6 Quiescence Vesicle SerumResponse	NME3	97.9798	10.2884	10.3051	10.57	9.84629	10.3431	9.86195	9.93357	9.8558	9.5321	9.23223	9.70887	9.39837	9.20403	9.94271	9.59079	9.46905	9.95241	9.37908	9.57811	10.1929	9.69255	9.91944	10.3759	9.77709
1	M1 UpD0 UpD6 Quiescence Vesicle SerumResponse	PPP2R3A	97.9798	9.73313	9.1219	9.56646	8.63667	8.84361	8.95988	9.68777	9.05457	8.87907	8.64066	8.87587	8.96745	8.81116	9.07963	9.05319	8.71944	8.93116	9.00625	8.84275	9.01704	8.93108	9.0455	9.00442	8.86369
1	M1 UpD0 UpD6 Quiescence Vesicle SerumResponse	PRKCD	97.9798	12.0073	11.8982	11.4503	11.3558	10.8103	10.6146	11.9787	10.8805	11.0109	11.7575	10.7225	10.9594	11.2273	10.9501	10.6327	10.9462	11.0262	10.815	10.9884	10.9261	10.7935	11.2261	11.1269	11.0968
1	M1 UpD0 UpD6 Quiescence Vesicle SerumResponse	SETD1A	97.9798	9.98608	9.92071	9.8972	9.31504	9.74692	9.1167	10.3309	10.0995	9.53567	9.61972	9.93004	9.61565	9.51612	9.85443	9.45069	9.30593	9.85029	9.55195	9.29587	9.96489	9.7811	9.16161	10.0407	9.69005
1	M1 UpD0 UpD6 Quiescence Vesicle SerumResponse	SLC4A5	97.9798	12.2995	11.1734	11.7187	10.4572	10.5818	10.8267	11.9018	11.0486	11.1506	10.4342	10.7209	10.9056	10.7508	10.8978	11.2651	10.4156	10.9444	11.2146	10.4666	10.9918	10.8604	11.2223	11.1882	10.8532
1	M1 UpD0 UpD6 Quiescence Vesicle SerumResponse	TMEM259	97.9798	10.335	10.1369	10.2475	9.3374	9.60875	9.16751	10.9355	9.92885	9.43216	9.51002	9.84928	9.52615	9.33872	9.66536	9.5383	9.45908	9.88203	9.62602	9.60974	9.86054	9.58186	9.48831	9.91896	9.64673
1	M1 UpD0 UpD6 Quiescence Vesicle SerumResponse	TNS3	97.9798	11.824	10.2707	10.7556	9.64058	8.89541	9.14462	9.61427	9.31968	9.60226	9.84304	9.10728	9.202	9.18555	8.95687	8.97549	9.1945	9.16844	9.12745	9.32088	9.41718	9.18692	10.1557	10.0396	9.50392
1	M1 UpD0 UpD6 Quiescence Vesicle SerumResponse	VPS11	97.9798	9.84454	9.79049	9.68406	8.89746	8.81164	8.89225	9.10328	8.94866	8.75249	8.72885	8.87353	8.84898	8.7108	8.91584	8.94727	8.75528	8.8763	8.8708	8.80569	8.92943	8.84727	8.95898	8.83942	8.97105
1	M1 UpD0 UpD6 Quiescence Vesicle SerumResponse	ZFAND2B	97.9798	10.7348	11.1869	10.9141	9.74178	9.66175	9.59091	11.4077	10.1275	9.6534	9.92629	10.2447	9.85127	9.88762	10.216	9.89871	9.86591	10.2086	9.94665	9.84441	10.3581	10.1535	9.83827	10.3636	10.2719
1	M1 UpD0 UpD6 Quiescence Vesicle SerumResponse	ZNF93	97.9798	10.3119	9.70636	10.0212	9.05286	9.21583	9.32522	9.88174	9.61924	9.43799	9.19854	9.43369	9.21151	9.26033	9.61164	9.62033	9.17897	9.50501	9.66578	9.27556	9.73258	9.42102	9.51102	9.58504	9.33544
1	M1 UpD0 UpD6 Quiescence Vesicle SerumResponse	ABHD14A	96.9697	9.34745	9.61228	9.4971	8.65903	8.65849	8.55504	9.29999	8.88305	8.52904	8.57535	8.73673	8.59855	8.61252	8.81854	8.5238	8.56755	8.88601	8.62837	8.9785	9.38954	9.11648	9.11317	9.49755	9.43783
1	M1 UpD0 UpD6 Quiescence Vesicle SerumResponse	ANKHD1	96.9697	10.0871	9.98016	10.0097	9.45116	9.38292	9.45245	9.83297	9.59569	9.49175	9.52154	9.44366	9.37884	9.19885	9.4527	9.45536	9.15591	9.52203	9.27004	9.12482	9.63501	9.55104	9.56504	10.0131	9.73091
1	M1 UpD0 UpD6 Quiescence Vesicle SerumResponse	DCP1A	96.9697	9.91459	10.1925	9.66425	9.35994	9.53886	9.17112	10.9369	9.54598	9.72124	9.31613	9.51087	9.50669	9.24624	9.42231	9.37896	9.32399	9.40563	9.3328	9.36382	9.56618	9.61534	9.43382	9.80462	9.72837
1	M1 UpD0 UpD6 Quiescence Vesicle SerumResponse	DDAH2	96.9697	9.84159	9.53683	9.46848	8.32394	8.41138	8.43574	9.94648	8.61618	8.52495	8.3404	8.65619	8.42084	8.49391	9.00946	8.51294	8.40069	9.20431	8.63371	8.41096	8.84361	8.52911	8.46388	8.75765	8.44752
1	M1 UpD0 UpD6 Quiescence Vesicle SerumResponse	DRAP1	96.9697	11.3558	12.382	11.9421	11.5141	11.4998	11.3216	12.295	11.5612	11.7417	11.4885	11.4098	11.7851	11.2867	11.4424	11.4833	11.2175	11.512	11.5153	11.1614	11.675	11.8053	11.4624	11.6528	11.8593
1	M1 UpD0 UpD6 Quiescence Vesicle SerumResponse	DXO	96.9697	9.04986	9.18868	9.14814	8.69308	8.74635	8.61351	9.84239	8.84587	8.50389	8.58253	8.83765	8.61749	8.61289	8.88011	8.59091	8.65611	8.88648	8.66107	8.8932	9.21932	8.88555	9.05933	9.40647	9.03409
1	M1 UpD0 UpD6 Quiescence Vesicle SerumResponse	FAM90A3P	96.9697	9.07428	9.38974	8.97587	8.5499	9.05062	8.68927	10.4016	9.00643	8.61396	8.71175	8.8158	8.80131	8.72922	9.01655	8.67557	8.68971	8.96242	8.75706	8.8281	9.32321	8.86206	9.17796	9.33796	9.25562
1	M1 UpD0 UpD6 Quiescence Vesicle SerumResponse	FOXN3	96.9697	12.1199	12.6789	12.3611	11.1869	11.6633	11.4272	12.0771	11.3876	11.5597	11.0311	11.2736	11.2045	11.1499	11.4959	11.4246	11.2515	11.4516	11.4704	11.012	11.4746	11.5381	11.36	11.8149	11.5971
1	M1 UpD0 UpD6 Quiescence Vesicle SerumResponse	GALNT9	96.9697	8.61191	8.48084	8.69828	7.99312	8.08561	8.12458	8.43772	8.25626	8.13111	8.10348	8.07752	8.05827	8.04827	8.12703	7.98511	7.99905	8.22324	8.07095	8.04954	8.14853	8.07842	8.11084	8.18277	8.22946
1	M1 UpD0 UpD6 Quiescence Vesicle SerumResponse	KIF21B	96.9697	10.1219	10.125	10.2554	9.73505	9.78296	9.89654	11.3159	9.69337	9.47428	9.25509	9.69238	9.36393	9.02248	10.1684	9.72525	9.65105	10.1583	9.9188	10.1786	10.2512	10.3087	10.7685	10.2689	10.1779
1	M1 UpD0 UpD6 Quiescence Vesicle SerumResponse	KRT18P55	96.9697	8.84151	8.77801	8.71064	7.96918	8.03691	8.13999	8.30614	8.11031	8.14634	8.0101	8.02494	8.21653	8.07515	8.16581	8.15075	7.97138	8.02046	8.0834	7.99056	8.12257	8.12698	8.16807	8.27508	8.10499
1	M1 UpD0 UpD6 Quiescence Vesicle SerumResponse	LMF2	96.9697	9.46763	9.3943	9.65745	8.91694	9.15932	8.90673	9.79049	9.54439	9.176	8.8762	9.43269	9.12893	8.94549	9.73712	9.54394	8.96673	9.77864	9.32498	9.23437	9.82688	9.61082	9.01245	9.85565	9.50756
1	M1 UpD0 UpD6 Quiescence Vesicle SerumResponse	LOC401261	96.9697	11.0252	10.8478	10.9898	8.86813	9.53196	9.31376	9.56349	9.92501	9.44494	9.11025	9.58983	9.26565	9.33677	9.65461	9.2975	9.23213	9.74438	9.35971	9.06973	9.96907	9.3613	9.3787	10.0212	9.46358
1	M1 UpD0 UpD6 Quiescence Vesicle SerumResponse	NRBP2	96.9697	9.17729	9.26753	9.17644	9.23691	9.37437	8.91777	9.05405	8.88728	8.70925	8.7646	8.91883	8.68021	8.88368	9.21379	9.02071	8.81864	9.17474	8.96433	8.90018	9.13002	8.70755	9.17402	9.26327	8.8088
1	M1 UpD0 UpD6 Quiescence Vesicle SerumResponse	PPP1R14A	96.9697	9.71087	10.2621	10.1151	9.0748	9.32294	9.17495	9.57215	9.1823	8.87937	8.85273	9.13104	8.76731	8.71145	9.37268	8.9437	8.78095	9.84502	9.27376	8.60194	9.5272	9.45215	8.59233	9.45116	9.89057
1	M1 UpD0 UpD6 Quiescence Vesicle SerumResponse	RPL28P5	96.9697	12.9891	13.2209	13.0727	11.926	12.0392	11.9391	13.4074	12.405	12.0456	11.915	12.258	12.4579	11.7064	12.0743	12.3094	11.6601	12.4297	12.0509	12.0878	12.3649	12.1854	12.4507	12.2334	12.3785
1	M1 UpD0 UpD6 Quiescence Vesicle SerumResponse	TAPBP	96.9697	12.6561	12.5618	12.1866	10.6378	10.9666	10.6561	11.14	11.2504	10.9261	10.9231	10.8779	11.0761	10.392	10.6831	10.8831	10.138	10.9678	10.6575	10.4025	11.7351	11.168	10.9826	11.8916	11.4617
1	M1 UpD0 UpD6 Quiescence Vesicle SerumResponse	TM9SF4	96.9697	10.1372	10.525	10.3882	9.81345	9.98594	9.92376	10.2784	10.1586	10.434	9.72015	9.84175	10.0476	9.62697	9.84782	9.86895	9.69407	9.88978	10.1906	9.75071	9.93892	10.2488	9.62242	10.206	10.3951
1	M1 UpD0 UpD6 Quiescence Vesicle SerumResponse	TMEM219	96.9697	10.3157	10.618	10.1678	9.44899	9.60807	9.48265	11.7917	9.82245	9.6889	9.51019	9.66408	9.66366	9.21847	9.72559	9.50683	9.27095	9.85811	9.44481	9.38335	10.1402	9.6866	10.0215	10.2579	9.88255
1	M1 UpD0 UpD6 Quiescence Vesicle SerumResponse	TSC2	96.9697	8.75144	8.74503	8.88116	8.2126	8.63421	8.24669	9.42295	8.73659	8.3665	8.08389	8.79767	8.49753	8.2289	8.78644	8.64979	8.21137	8.81457	8.64136	8.29697	9.04684	8.65641	8.39108	9.10398	8.76708
1	M1 UpD0 UpD6 Quiescence Vesicle SerumResponse	AGAP4	95.9596	10.4218	9.91619	9.88789	9.63032	10.2147	9.19787	9.86225	9.84738	9.5608	9.56895	9.80208	9.29502	9.61415	9.57432	9.35926	9.53282	9.72029	9.51526	9.81743	9.97753	9.50912	10.0713	10.3138	9.68516
1	M1 UpD0 UpD6 Quiescence Vesicle SerumResponse	ALDH2	95.9596	9.14304	8.95026	8.72493	8.45649	8.71416	8.65251	8.88704	8.81092	8.6436	8.47565	8.86951	8.72623	8.41864	8.54598	8.55564	8.38109	8.59941	8.47766	8.44026	8.91797	8.3887	9.57971	9.21608	8.5266
1	M1 UpD0 UpD6 Quiescence Vesicle SerumResponse	APBB3	95.9596	10.8444	10.7109	10.8102	9.67748	9.89543	9.48019	9.76163	10.2341	9.41552	9.49768	10.0242	9.57982	9.33011	9.6578	9.43168	9.17111	9.6392	9.35359	9.34187	10.1361	9.43161	9.91808	10.5006	9.86978
1	M1 UpD0 UpD6 Quiescence Vesicle SerumResponse	ATP6AP1	95.9596	12.8593	12.7127	12.4384	11.7712	11.8405	11.7909	12.4591	12.5103	11.9778	12.2804	12.4555	12.2487	12.3293	12.5151	12.1521	12.3529	12.4555	12.1511	12.7568	12.9577	12.3942	12.9538	13.2209	12.6851
1	M1 UpD0 UpD6 Quiescence Vesicle SerumResponse	BSDC1	95.9596	11.8018	11.7368	11.6478	9.85292	10.3613	10.2084	10.9859	10.9358	10.439	10.2176	10.6341	10.8194	9.97439	10.1156	10.4316	9.98911	10.3005	10.2361	10.0695	10.6609	10.4903	10.5046	10.9712	10.4706
1	M1 UpD0 UpD6 Quiescence Vesicle SerumResponse	CHMP7	95.9596	9.03278	9.02682	8.9422	8.30084	8.5899	8.33022	8.81466	8.75556	8.4122	8.43183	8.65132	8.5899	8.49784	8.86449	8.7375	8.57129	9.03542	8.72364	8.69712	8.89754	8.64448	8.52873	8.61661	8.50394
1	M1 UpD0 UpD6 Quiescence Vesicle SerumResponse	CRYL1	95.9596	8.85052	8.82626	8.84552	8.14475	8.34155	8.31432	8.68378	8.36566	8.27612	8.28184	8.29355	8.31377	8.20357	8.21081	8.28844	8.17954	8.36535	8.25062	8.20485	8.3753	8.19475	8.40368	8.50063	8.36382
1	M1 UpD0 UpD6 Quiescence Vesicle SerumResponse	ECI1	95.9596	10.4819	10.5077	10.449	10.0045	10.579	10.0627	11.2478	10.3753	9.75207	10.251	10.4549	9.87799	10.207	10.3858	9.71276	10.1893	10.3208	9.86136	10.1674	10.4969	9.68171	10.5341	10.4404	10.1413
1	M1 UpD0 UpD6 Quiescence Vesicle SerumResponse	FAM173A	95.9596	10.2253	10.5723	10.2484	9.86306	10.0037	9.64108	10.2729	10.2481	9.80317	9.8558	10.4021	9.89667	10.153	10.554	10.3079	10.1287	10.4867	10.2705	10.1941	10.5236	10.4214	9.98911	10.4832	10.1007
1	M1 UpD0 UpD6 Quiescence Vesicle SerumResponse	FAM3A	95.9596	11.2651	11.6742	11.3831	10.4854	10.7242	10.3278	11.5036	11.1513	10.6759	10.4244	11.2123	10.4857	10.2521	11.0486	10.4461	10.1673	10.8487	10.3573	10.1978	11.1595	10.5068	10.6561	11.323	10.7176
1	M1 UpD0 UpD6 Quiescence Vesicle SerumResponse	HDHD3	95.9596	9.81897	9.98741	9.84143	8.98759	9.15278	9.33452	9.93803	9.5863	9.24375	9.24529	9.45191	9.57332	9.15347	9.30198	9.45245	9.05204	9.2207	9.22777	9.0019	9.66797	9.4701	9.50444	9.70721	9.68224
1	M1 UpD0 UpD6 Quiescence Vesicle SerumResponse	HS.208623	95.9596	8.6036	9.21115	8.82157	8.24999	8.37258	8.40505	9.58491	8.52595	8.472	8.50257	8.41934	8.46694	8.49033	8.43066	8.32105	8.32668	8.39589	8.29114	8.40324	8.47573	8.50629	8.63338	9.43734	8.62036
1	M1 UpD0 UpD6 Quiescence Vesicle SerumResponse	LOC646626	95.9596	8.47561	8.90175	8.74767	8.0584	8.03194	8.0237	8.09544	8.0969	8.04657	8.14195	8.07675	8.06211	8.05505	7.97329	7.98481	7.95341	8.07302	8.08776	7.98814	8.09041	8.01221	8.05212	8.07128	8.08227
1	M1 UpD0 UpD6 Quiescence Vesicle SerumResponse	LOC651198	95.9596	11.4066	11.6258	11.4233	10.9594	10.8455	10.7759	12.9518	11.0749	10.9546	10.6522	11.1234	10.8709	10.4239	11.0944	10.7118	10.4295	11.0174	10.7835	10.6621	11.0812	10.936	10.8814	10.9884	11.1028
1	M1 UpD0 UpD6 Quiescence Vesicle SerumResponse	MAPK8IP3	95.9596	11.2394	10.8147	11.1091	9.22136	9.65662	9.12064	9.90543	10.0695	9.82728	9.18868	9.82931	9.68791	9.05964	9.44661	9.61328	8.97219	9.63566	9.7278	9.10208	9.95274	9.47542	9.86279	10.4749	9.81673
1	M1 UpD0 UpD6 Quiescence Vesicle SerumResponse	PINK1	95.9596	8.96998	9.29325	8.96207	8.26665	8.17114	8.3151	8.94736	8.61095	8.46581	8.47591	8.43476	8.55198	8.42223	8.54158	8.51991	8.46897	8.3615	8.45454	8.46499	8.49922	8.51594	8.92678	9.07752	9.27979
1	M1 UpD0 UpD6 Quiescence Vesicle SerumResponse	PLD3	95.9596	10.7465	11.2447	10.6863	9.97065	10.1834	10.1882	11.772	10.2705	10.3309	10.0546	10.3651	10.0704	10.2697	10.4795	10.1277	10.1607	10.2703	9.92709	10.7352	11.1561	10.5595	12.0001	11.6601	11.0817
1	M1 UpD0 UpD6 Quiescence Vesicle SerumResponse	POFUT2	95.9596	9.65242	9.81757	9.8028	8.70292	9.09074	8.81406	9.99862	9.31922	9.22881	8.86155	9.11057	8.9439	8.6697	8.93238	9.11526	8.7335	9.00961	8.83093	8.76057	9.16682	8.95917	9.09748	9.46048	9.11283
1	M1 UpD0 UpD6 Quiescence Vesicle SerumResponse	PRDM2	95.9596	8.98789	8.52648	8.81131	8.10574	8.12998	8.17464	8.60563	8.22629	8.31178	8.16781	8.30407	8.17185	8.0839	8.21531	8.14475	8.15325	8.27179	8.22911	8.18481	8.30301	8.21348	8.27634	8.1311	8.35851
1	M1 UpD0 UpD6 Quiescence Vesicle SerumResponse	RASAL3	95.9596	11.0607	11.1699	10.6927	9.97002	10.3829	10.1246	11.5723	10.7494	9.99785	9.88242	11.0596	10.2594	10.5775	11.6636	10.963	10.8393	11.6476	11.1206	10.8154	11.4037	10.8561	10.557	11.2703	10.7302
1	M1 UpD0 UpD6 Quiescence Vesicle SerumResponse	RFX1	95.9596	9.6358	9.60686	9.6711	8.73594	8.93585	8.80587	9.23036	9.47747	9.24519	8.92187	9.19291	9.15416	8.81039	9.2499	9.06024	8.68521	9.19572	9.11385	8.73693	9.32008	9.08707	8.99261	9.24541	9.16669
1	M1 UpD0 UpD6 Quiescence Vesicle SerumResponse	SECISBP2L	95.9596	10.3568	10.2607	10.1488	9.28889	9.56518	9.4854	9.99183	9.69285	9.39786	9.46791	9.76927	9.45565	9.52487	9.65814	9.34758	9.58376	9.84075	9.53496	9.87218	10.1108	9.84107	10.5986	10.4698	10.3423
1	M1 UpD0 UpD6 Quiescence Vesicle SerumResponse	SNTA1	95.9596	9.19733	9.37562	9.10337	8.5884	8.62617	8.62774	9.48422	8.63573	8.62404	8.57777	8.98428	8.71749	8.63211	9.54499	8.94791	8.89239	9.71486	9.05142	8.84323	9.1663	8.80124	8.82879	8.76358	8.64521
1	M1 UpD0 UpD6 Quiescence Vesicle SerumResponse	TAGLN	95.9596	11.787	11.4544	11.3216	8.7071	9.0455	8.5696	8.84637	9.24025	9.08877	8.71296	8.96619	8.73835	8.61108	8.98725	8.84504	8.52235	9.33605	8.79412	8.66535	9.39109	8.68424	8.90232	9.33846	8.94695
1	M1 UpD0 UpD6 Quiescence Vesicle SerumResponse	TMUB2	95.9596	10.106	10.0175	10.0792	9.30416	9.2956	9.33546	9.33328	9.63111	9.29954	9.31091	9.62308	9.28702	9.22915	9.53744	9.27333	9.23047	9.56492	9.25765	9.31045	9.75563	9.22307	9.49484	9.69841	9.31224
1	M1 UpD0 UpD6 Quiescence Vesicle SerumResponse	TRAPPC6A	95.9596	10.587	10.7561	10.713	9.44973	9.6871	9.62587	10.3738	9.92862	9.50683	9.43684	9.90106	9.62474	9.28145	9.72909	9.60686	9.3217	9.85413	9.47607	9.31104	10.0326	9.42464	9.91619	10.1457	9.68568
1	M1 UpD0 UpD6 Quiescence Vesicle SerumResponse	UBA7	95.9596	12.4695	11.9157	11.876	10.0399	10.4651	10.3558	11.9468	10.3947	10.4493	10.0925	10.2109	10.5022	10.0086	10.1042	10.3696	9.70038	10.4419	10.3585	10.0866	10.9225	10.1624	10.7149	10.8831	10.4361
1	M1 UpD0 UpD6 Quiescence Vesicle SerumResponse	UBXN6	95.9596	9.63878	10.1632	9.66146	8.97181	9.04413	9.10528	9.38808	9.44206	9.23414	8.94648	9.41339	9.31216	8.89694	9.28455	8.99626	8.80011	9.23906	9.07687	8.91421	9.44181	8.91806	9.29468	9.607	9.20049
1	M1 UpD0 UpD6 Quiescence Vesicle SerumResponse	VAMP3	95.9596	10.3502	10.5317	10.2426	9.2827	9.38533	9.30593	9.71568	9.56324	9.56822	9.37989	9.612	9.41542	9.25001	9.53425	9.53253	9.37578	9.55335	9.43615	9.46281	9.6353	9.40553	9.4927	9.60182	9.52075
1	M1 UpD0 UpD6 Quiescence Vesicle SerumResponse	VIPR1	95.9596	8.91014	8.64893	8.88173	8.26422	8.24717	8.22447	9.04371	8.27351	8.26533	8.03686	8.3745	8.40549	8.13521	8.25308	8.24849	8.17888	8.36454	8.21682	8.1354	8.28551	8.24886	8.31194	8.38129	8.28394
1	M1 UpD0 UpD6 Quiescence Vesicle SerumResponse	ZBTB48	95.9596	10.6543	10.3126	10.3492	9.18913	9.69728	9.43078	9.69748	9.98187	9.81525	9.50161	10.034	9.76323	9.49312	9.93987	9.68467	9.50059	10.1074	9.76358	9.65568	10.0805	9.63938	9.83929	9.89125	9.53736
1	M1 UpD0 UpD6 Quiescence Vesicle SerumResponse	ZNF706	95.9596	9.63554	9.03333	9.14356	8.59106	8.90751	8.60714	9.18806	9.06714	8.67708	8.95512	8.9459	8.8074	8.95528	9.25826	8.79566	8.98902	9.10913	8.89369	8.977	9.21914	9.01511	9.13671	9.25657	9.17322
1	M1 UpD0 UpD6 Quiescence Vesicle SerumResponse	AGAP6	94.9495	11.5108	11.1009	11.279	10.7893	10.9444	10.4639	10.665	10.6158	10.5313	10.6526	10.8019	10.3427	10.8257	10.6713	10.4825	10.9362	10.8728	10.4408	10.9969	10.876	10.5592	11.3551	11.1617	10.7277
1	M1 UpD0 UpD6 Quiescence Vesicle SerumResponse	AMFR	94.9495	11.2253	10.261	10.5209	9.80403	9.77565	9.08213	9.23036	9.50472	9.46965	9.79597	9.69728	9.4832	9.98938	9.72143	9.79496	9.91364	9.97571	9.68373	9.93523	10.2849	9.74969	10.2353	10.2752	9.37253
1	M1 UpD0 UpD6 Quiescence Vesicle SerumResponse	APBA3	94.9495	10.329	10.6482	10.0094	9.64817	9.89832	9.24646	11.1632	10.0461	9.25084	9.66815	9.90878	9.61751	9.66057	9.90923	9.39109	9.62048	9.81828	9.51389	9.66009	10.0636	9.64058	9.56994	10.2021	9.73873
1	M1 UpD0 UpD6 Quiescence Vesicle SerumResponse	ARRDC1-AS1	94.9495	9.39376	9.29428	9.13586	8.80488	8.97093	8.60769	9.27129	9.06248	8.44977	8.96068	9.34633	8.70018	8.9845	8.90575	8.73542	9.1168	9.05784	8.6663	9.24552	9.0748	8.85559	9.1633	9.24692	8.7981
1	M1 UpD0 UpD6 Quiescence Vesicle SerumResponse	C17orf62	94.9495	10.6415	10.5593	10.592	10.1142	10.294	10.1934	11.5478	10.473	9.71221	9.71709	10.4808	10.2109	9.91778	10.6667	10.4753	9.97467	10.8626	10.393	10.0607	11.0282	10.5587	10.5247	10.96	10.6575
1	M1 UpD0 UpD6 Quiescence Vesicle SerumResponse	CD1C	94.9495	10.7503	10.6782	11.1545	9.77993	9.6563	9.21389	11.0339	9.28923	9.10165	9.41402	9.24508	8.99969	9.14206	9.79901	9.39416	9.3821	10.2795	9.5485	9.54737	9.97571	9.22758	9.43996	9.47803	8.85421
1	M1 UpD0 UpD6 Quiescence Vesicle SerumResponse	CLEC2B	94.9495	9.77469	10.9614	9.61415	8.69883	9.34413	8.49443	8.94308	9.12139	8.32538	8.53419	9.22915	8.35489	8.8349	9.54991	8.49174	8.81973	9.7939	8.57472	8.76427	9.66562	8.27372	8.66945	9.82859	8.37424
1	M1 UpD0 UpD6 Quiescence Vesicle SerumResponse	CORO7	94.9495	9.50083	9.21282	9.3949	8.80003	9.11351	8.88416	10.094	9.24585	8.89247	8.88219	9.10434	8.90648	8.82937	9.54625	9.21882	8.95548	9.78296	9.24692	9.05666	9.90878	9.71519	9.17796	10.0042	10.0407
1	M1 UpD0 UpD6 Quiescence Vesicle SerumResponse	CPSF1	94.9495	10.814	10.8779	10.7888	10.1429	10.4008	10.1198	12.0995	10.6189	10.218	10.0573	10.5191	10.2643	10.2748	10.8911	10.5145	10.2089	10.8555	10.5804	10.6823	11.185	10.7093	10.7153	11.3291	10.8836
1	M1 UpD0 UpD6 Quiescence Vesicle SerumResponse	DUSP22	94.9495	11.9166	11.553	11.0573	10.9656	10.8332	10.3622	10.6856	10.8211	10.1736	10.7708	10.5475	10.2864	10.8589	10.7786	10.3293	10.7883	10.6969	10.2306	10.9991	11.3767	10.3449	11.5724	11.8666	10.3105
1	M1 UpD0 UpD6 Quiescence Vesicle SerumResponse	EIF2B5	94.9495	11.4327	11.2135	11.0835	10.5529	11.0104	10.419	11.5787	10.8657	10.1453	10.8027	11.0327	10.4788	10.814	11.0048	10.517	10.881	11.0297	10.3786	11.1068	11.1882	10.4284	10.7518	11.1161	10.4791
1	M1 UpD0 UpD6 Quiescence Vesicle SerumResponse	EMP3	94.9495	12.4226	11.9796	12.4007	12.1922	11.7902	11.587	12.4625	12.2689	11.8398	12.7495	12.3307	11.7232	12.1425	12.4661	11.5801	11.8903	12.5632	12.0653	11.8841	12.76	12.2536	12.193	13.0324	12.8459
1	M1 UpD0 UpD6 Quiescence Vesicle SerumResponse	GALT	94.9495	9.97786	9.88329	9.68863	9.41687	9.45579	9.31826	9.97799	9.13806	9.06141	9.23227	9.22472	9.0825	9.17322	9.37664	9.03477	9.16201	9.36388	9.18597	9.32786	9.48027	9.23069	9.27739	9.45743	9.16895
1	M1 UpD0 UpD6 Quiescence Vesicle SerumResponse	GSDMD	94.9495	12.153	12.0573	12.0222	11.2278	11.4677	10.8774	12.1737	11.1793	10.7802	11.0852	11.3952	10.701	11.5651	11.6697	10.9451	11.3263	11.5373	11.184	11.0857	11.3931	10.8083	11.4227	11.2861	10.8468
1	M1 UpD0 UpD6 Quiescence Vesicle SerumResponse	ITGB2	94.9495	13.7065	13.7587	13.4182	13.3171	13.3639	13.0134	13.2045	13.1268	12.9167	13.2911	13.0591	12.8689	13.1222	13.4252	12.9771	13.2735	13.619	13.0221	13.2837	13.7238	13.022	13.5305	13.5372	12.7061
1	M1 UpD0 UpD6 Quiescence Vesicle SerumResponse	KAT8	94.9495	9.88896	10.2312	9.91163	9.44206	9.72627	9.28116	11.8673	9.3035	8.86504	9.3022	9.26765	9.1799	9.19424	9.46669	8.77751	9.355	9.57395	8.9841	9.58983	9.45081	9.14399	9.40247	9.49339	9.18054
1	M1 UpD0 UpD6 Quiescence Vesicle SerumResponse	KMT2B	94.9495	9.81359	9.34877	9.59752	9.03794	9.33981	8.99039	10.3165	9.95344	9.56436	9.1398	9.69507	9.23894	9.07281	9.6866	9.43748	9.08124	9.87135	9.53496	9.14964	9.86279	9.37668	9.1284	10.1138	9.58401
1	M1 UpD0 UpD6 Quiescence Vesicle SerumResponse	KYAT1	94.9495	9.76373	9.34135	9.57332	9.19585	9.519	9.04245	9.11099	9.04284	8.94352	8.91437	9.08248	8.78716	9.06024	9.20384	8.88998	9.00684	9.19177	8.85766	9.04922	9.33291	8.81891	9.28923	9.20247	8.95439
1	M1 UpD0 UpD6 Quiescence Vesicle SerumResponse	MAN2B1	94.9495	9.40832	9.63747	9.23691	8.76817	9.14846	8.68665	10.3093	9.40371	8.87071	8.73508	9.04523	8.8481	8.88305	9.27095	8.90655	8.79706	9.66271	9.16879	9.12757	10.1332	9.21738	9.48503	10.2568	9.71885
1	M1 UpD0 UpD6 Quiescence Vesicle SerumResponse	MOB2	94.9495	9.48265	10.1391	9.67367	8.77383	8.66466	8.4826	10.3658	9.27095	8.79209	8.93314	8.9756	8.89088	8.63741	9.08222	8.62257	8.48205	9.07186	8.69398	8.56822	9.17081	8.78232	8.79481	9.13062	8.85799
1	M1 UpD0 UpD6 Quiescence Vesicle SerumResponse	PAOX	94.9495	10.1368	10.5205	9.86493	9.61319	9.33131	9.25537	9.7142	9.06064	9.08306	9.38777	9.17673	8.99417	9.62291	9.61676	9.21568	9.56389	9.68695	9.18476	9.63876	9.47328	9.15096	10.0374	9.50739	9.14956
1	M1 UpD0 UpD6 Quiescence Vesicle SerumResponse	PPOX	94.9495	9.79179	9.74178	9.64184	9.37108	9.36959	9.10889	9.82786	9.65385	9.18267	9.28445	9.72559	9.05176	9.49051	9.74665	9.34166	9.10861	9.56562	9.22726	9.34344	9.94696	9.54749	9.7401	10.1655	9.83177
1	M1 UpD0 UpD6 Quiescence Vesicle SerumResponse	RASA3	94.9495	9.44341	9.15056	9.01832	8.27551	8.63317	8.40834	9.88821	8.53875	8.49084	8.20625	8.8404	8.40723	8.24226	9.25562	8.70562	8.5499	9.42811	8.70853	8.47357	9.51566	9.17428	8.60936	9.58148	9.20922
1	M1 UpD0 UpD6 Quiescence Vesicle SerumResponse	RHBDF2	94.9495	12.3681	11.6213	11.9796	10.4348	10.4617	10.3477	11.1151	11.0692	10.6731	10.8429	10.7411	10.759	10.3318	10.9188	10.6459	10.2451	11.0491	10.6863	10.0172	11.1904	10.234	10.9154	11.2381	10.5046
1	M1 UpD0 UpD6 Quiescence Vesicle SerumResponse	RNF113A	94.9495	10.7667	10.5117	10.6254	10.1618	10.1088	9.98247	10.3358	9.95998	9.3675	9.70231	9.86025	9.67755	9.8555	10.0225	9.77825	10.1652	10.0709	9.73282	10.256	9.98622	9.65934	10.3096	10.1195	9.89705
1	M1 UpD0 UpD6 Quiescence Vesicle SerumResponse	RPP21	94.9495	12.1091	11.9451	12.1769	11.4024	11.5127	11.3323	12.4122	11.8958	11.3194	11.6889	12.119	11.4665	11.5679	11.6858	11.2374	11.4544	11.6997	11.0335	11.6575	11.9367	11.3786	11.6428	11.8574	11.5486
1	M1 UpD0 UpD6 Quiescence Vesicle SerumResponse	SCNN1D	94.9495	9.51957	8.85198	9.34039	8.63667	8.52792	8.27722	8.69529	8.58404	8.2267	8.42871	8.49947	8.25444	8.3951	8.56749	8.23596	8.33656	8.63659	8.36763	8.39085	8.64979	8.21919	8.82695	8.73835	8.36608
1	M1 UpD0 UpD6 Quiescence Vesicle SerumResponse	SPEN	94.9495	11.5011	11.0968	11.4855	10.7988	11.0534	10.777	12.1457	11.5135	11.5612	11.2123	11.29	11.1339	10.8716	11.1513	10.9257	10.7935	11.2349	11.1318	10.8009	11.4516	11.1915	10.7914	11.4977	11.3883
1	M1 UpD0 UpD6 Quiescence Vesicle SerumResponse	SULT1A4	94.9495	9.16648	8.63802	9.08812	8.4715	8.61419	8.43875	9.3464	8.77891	8.83369	8.53893	8.79608	8.50501	8.5459	8.91024	8.61212	8.63894	8.84837	8.74727	8.61295	8.83943	8.60792	8.55947	8.75639	8.65518
1	M1 UpD0 UpD6 Quiescence Vesicle SerumResponse	TCIRG1	94.9495	10.7572	10.3011	10.7998	9.80127	9.93394	9.68878	10.5662	10.2322	9.57797	9.34715	10.252	9.77392	9.78851	10.8496	10.5364	9.88572	11.2194	10.6064	10.1184	11.7064	10.7069	10.4354	11.8916	10.9701
1	M1 UpD0 UpD6 Quiescence Vesicle SerumResponse	THEM6	94.9495	10.9625	10.8671	10.9821	9.96576	10.4142	10.0267	10.1143	10.0832	9.42538	9.95856	10.1477	9.83139	10.0631	10.2005	9.78785	10.3009	10.2219	9.73967	10.4237	10.3228	9.82588	10.1213	10.3744	9.97909
1	M1 UpD0 UpD6 Quiescence Vesicle SerumResponse	UIMC1	94.9495	12.4513	12.2526	12.2865	11.51	11.7712	11.4223	11.8529	11.5057	11.0699	11.4451	11.7376	11.1845	11.623	11.9333	11.1657	11.7023	11.9271	11.2291	11.8255	11.833	11.258	11.8516	11.9908	11.481
1	M1 UpD0 UpD6 Quiescence Vesicle SerumResponse	USP4	94.9495	10.0132	10.0959	9.82245	9.63954	9.69384	9.3273	10.1138	9.68301	9.33745	9.58401	10.0232	9.5809	9.95446	10.1306	9.49854	9.8494	9.99637	9.50993	9.79511	9.95687	9.58746	9.68791	9.91489	9.60611
1	M1 UpD0 UpD6 Quiescence Vesicle SerumResponse	WDR97	94.9495	9.08145	8.71395	8.63616	8.35747	8.30927	8.28629	8.99039	8.26267	8.13263	8.274	8.40509	8.14723	8.29842	8.3344	8.19389	8.44803	8.33037	8.27905	8.37149	8.40597	8.16055	8.3742	8.43417	8.16032
1	M1 UpD0 UpD6 Quiescence Vesicle SerumResponse	ZNF317	94.9495	10.3149	10.6007	10.0386	9.69303	9.6341	9.41389	10.7407	10.0218	9.63368	9.69596	10.0322	9.77392	9.55833	9.8348	9.42343	9.56994	9.88477	9.52867	9.72855	9.92758	9.54976	9.72491	9.93973	9.80074
1	M1 UpD0 UpD6 Quiescence Vesicle SerumResponse	ZRSR2	94.9495	10.6474	10.3427	10.1558	9.5694	9.50745	9.27705	9.5549	9.53798	9.16583	9.47626	9.56128	9.13134	9.43213	9.53218	9.16684	9.37002	9.5279	9.26592	9.52673	9.72862	9.20286	9.62491	9.72079	9.21526
1	M1 UpD0 UpD6 Quiescence Vesicle SerumResponse	ARL6IP4	93.9394	9.98557	10.0702	9.77946	9.817	9.85029	9.46683	11.3236	9.87429	9.65027	9.24157	9.87799	9.60152	9.50912	10.0156	9.76518	9.27304	10.0589	9.74665	9.69898	9.94849	9.6194	9.4738	10.0925	9.53795
1	M1 UpD0 UpD6 Quiescence Vesicle SerumResponse	ATG16L2	93.9394	9.79214	9.3273	9.41757	8.52911	8.78535	8.50341	8.56802	8.68807	8.32366	8.30288	8.52966	8.47196	8.29009	8.69431	8.46806	8.34893	8.78206	8.47492	8.45965	8.92801	8.44662	8.62216	9.04818	8.43644
1	M1 UpD0 UpD6 Quiescence Vesicle SerumResponse	C5	93.9394	9.9033	9.42865	9.72491	8.53755	8.51218	8.49209	8.54322	8.49629	8.35758	8.4602	8.39168	8.37029	8.52121	8.53344	8.56432	8.52145	8.54752	8.54739	8.26273	8.56459	8.38549	8.60835	8.65403	8.42361
1	M1 UpD0 UpD6 Quiescence Vesicle SerumResponse	LOC100134364	93.9394	9.38349	9.5528	9.03156	8.90741	8.8405	8.70478	10.0855	9.913	8.76817	8.78856	9.39274	8.82404	8.72692	9.15358	8.9665	8.73765	9.28116	8.66364	8.88621	9.56174	8.8258	9.01535	9.75845	9.03354
1	M1 UpD0 UpD6 Quiescence Vesicle SerumResponse	LOC649143	93.9394	11.5255	12.4213	11.7216	10.5462	10.4751	10.3309	11.0081	10.2982	10.0476	9.93925	10.2954	9.97404	10.2002	10.731	10.509	10.3475	10.9484	11.0098	10.4388	10.8129	10.4497	10.3517	10.3794	10.2337
1	M1 UpD0 UpD6 Quiescence Vesicle SerumResponse	UBE2E2	93.9394	11.1327	11.6705	11.2749	10.3427	10.7859	10.5611	10.3797	10.1361	10.2826	10.3842	10.0864	10.0267	10.1306	10.4253	10.1855	10.1166	10.4426	10.1555	10.1826	10.6979	10.3286	10.3224	10.5854	10.3256
1	M1 UpD0 UpD6 Quiescence Vesicle SerumResponse	CD99	92.9293	10.2403	10.2309	10.2091	9.48347	9.47733	9.47257	10.933	9.79031	9.54528	9.76485	9.79496	9.46905	9.40219	10.5337	9.91399	9.68791	11.0169	10.4086	10.127	11.1258	10.8175	10.7723	11.2486	11.1327
1	M1 UpD0 UpD6 Quiescence Vesicle SerumResponse	HCK	92.9293	10.1449	9.74692	9.9866	9.49075	9.88402	9.85794	11.1351	9.39786	9.65595	8.84016	9.51957	9.70935	9.3247	10.7247	10.5639	9.5892	11.0962	10.9691	9.70377	10.9293	10.6595	10.1777	10.3856	10.0463
1	M1 UpD0 UpD6 Quiescence Vesicle SerumResponse	LRMP	92.9293	11.9	11.8248	11.8117	11.6188	11.876	12.0381	12.2173	11.5486	11.2368	10.8952	12.0353	11.3977	11.8168	12.0392	12.1769	11.9633	12.215	12.3553	11.7881	11.8574	11.99	12.108	12.0573	11.974
1	M1 UpD0 UpD6 Quiescence Vesicle SerumResponse	SKAP2	92.9293	11.4617	11.4645	11.114	10.5653	11.1826	10.9023	11.3715	10.6398	10.5343	10.4799	10.689	10.4287	10.8491	11.046	10.5909	10.8932	11.145	10.9985	10.3878	11.0376	10.6829	10.7942	10.9266	10.5649
1	M1 UpD0 UpD6 Quiescence Vesicle SerumResponse	SUSD3	92.9293	11.1811	10.8462	10.7635	10.3599	9.99867	10.3047	10.4503	9.77694	9.68865	9.64307	9.99849	10.3212	10.4248	10.5383	10.57	10.4088	10.4685	10.3433	10.3081	10.421	9.93772	10.5945	10.2384	9.987
1	M1 UpD0 UpD6 Quiescence Vesicle SerumResponse	HS.485155	91.9192	9.8526	9.82555	9.89418	9.10917	9.38974	8.97129	9.54146	9.06111	8.94066	8.82104	9.19854	8.86523	8.7972	9.228	8.87796	8.85766	9.25933	9.00065	8.75725	9.2101	9.04135	8.70241	9.30056	9.0945
1	M1 UpD0 UpD6 Quiescence Vesicle SerumResponse	ID2B	91.9192	8.36593	8.49583	8.37204	8.25136	8.32749	8.37829	8.51062	8.27413	8.38726	8.23732	8.34031	8.30918	8.24354	8.47565	8.48347	8.33926	8.63905	8.49641	8.35632	9.10377	8.57992	8.88783	9.21882	8.77325
1	M1 UpD0 UpD6 Quiescence Vesicle SerumResponse	PYROXD2	91.9192	8.66541	8.70878	8.67869	7.90999	8.00635	7.90544	7.9693	8.04402	7.9788	7.89469	7.91988	7.9567	7.94548	8.02191	7.92545	7.89496	7.93889	7.98022	7.94846	7.99074	7.91606	7.99685	8.11329	7.98265
1	M1 UpD0 UpD6 Quiescence Vesicle SerumResponse	RHOH	91.9192	9.71324	10.039	9.49587	9.30893	9.14714	9.54557	9.41509	9.27217	8.97342	8.8725	9.30524	9.16844	9.29502	9.51353	9.60341	9.38091	9.15868	9.46332	9.32894	9.3273	9.3009	9.21257	9.18159	9.02109
1	M1 UpD0 UpD6 Quiescence Vesicle SerumResponse	AES	90.9091	11.462	11.8712	11.5535	10.169	10.4778	10.2751	10.7484	10.7249	10.531	10.1959	10.8147	10.6037	10.5179	11.6529	11.0692	10.7328	11.9008	11.3489	10.527	11.346	11.279	10.592	11.0987	10.9312
1	M1 UpD0 UpD6 Quiescence Vesicle SerumResponse	ALDH16A1	90.9091	9.17231	9.56865	9.58307	8.5381	8.88611	8.52267	10.1617	9.05319	8.75917	8.57075	9.18947	8.71096	8.69112	9.47428	9.20326	8.79758	9.55741	9.14814	8.48659	9.4565	9.18267	8.55174	9.31547	9.01237
1	M1 UpD0 UpD6 Quiescence Vesicle SerumResponse	CD53	90.9091	12.5096	12.6754	12.38	11.0565	11.2454	11.2721	11.81	11.5653	11.3073	11.157	11.9228	11.6812	11.5019	12.1358	12.077	11.3893	12.0291	11.9384	11.1396	11.9031	11.7707	11.3616	11.7215	11.7636
1	M1 UpD0 UpD6 Quiescence Vesicle SerumResponse	CNN2	90.9091	12.8427	12.9387	12.5355	12.0445	11.9559	11.7249	13.9324	12.5279	11.9325	12.1568	12.5656	12.2195	12.748	13.3655	12.8379	12.6646	13.1854	12.888	12.2019	12.8695	12.5237	11.7417	12.4272	12.2932
1	M1 UpD0 UpD6 Quiescence Vesicle SerumResponse	ENGASE	90.9091	9.30711	9.18957	9.28706	8.29174	8.44838	8.18775	9.42217	8.76546	8.22935	8.15103	8.52878	8.37115	8.23837	8.58652	8.37533	8.22515	8.51314	8.25029	8.26541	8.68856	8.27349	8.3977	8.66852	8.23889
1	M1 UpD0 UpD6 Quiescence Vesicle SerumResponse	MARCH2	90.9091	9.17517	9.25562	9.08134	8.32162	8.53816	8.39493	9.07567	8.70698	8.45005	8.50918	8.87098	8.68126	8.71387	9.29935	9.08043	8.77843	9.4071	9.00272	8.57235	9.34491	8.79635	8.63153	9.24035	8.83829
1	M1 UpD0 UpD6 Quiescence Vesicle SerumResponse	OGFR	90.9091	9.96558	9.90072	9.73993	9.06404	9.35339	9.12441	10.409	9.62532	9.41743	8.99555	9.71486	9.23437	9.13323	9.92102	9.38454	9.17474	9.82277	9.49536	9.06215	9.77841	9.40219	8.96291	9.78464	9.37908
1	M1 UpD0 UpD6 Quiescence Vesicle SerumResponse	RGS19	90.9091	11.7808	12.0018	11.6592	10.2299	10.1057	10.0663	10.5717	10.5529	9.99345	9.75903	10.7675	10.5371	10.3607	11.6098	11.1302	10.4666	11.5709	11.4677	10.1882	11.3757	11.0042	10.1153	11.0306	10.7093
1	M1 UpD0 UpD6 Quiescence Vesicle SerumResponse	RPS6KA4	90.9091	9.5688	9.60509	9.59108	9.04027	9.0684	8.87197	9.38941	9.29777	9.0078	8.97252	9.54922	9.17921	9.31168	9.91583	9.60023	9.39576	9.98107	9.75956	9.04735	9.75441	9.60117	8.78792	9.33618	9.28493
1	M1 UpD0 UpD6 Quiescence Vesicle SerumResponse	SFSWAP	90.9091	10.2533	10.1168	10.0761	9.51019	9.6362	9.2848	10.2795	9.65091	9.69222	9.3949	9.60584	9.31872	9.42203	9.65779	9.44988	9.45969	9.6494	9.44446	9.38609	9.70921	9.62128	9.28989	9.89705	9.58
1	M1 UpD0 UpD6 Quiescence Vesicle SerumResponse	AIP	89.899	11.1603	11.2777	10.9869	10.4182	10.3654	10.0602	11.0704	10.8338	10.3009	10.3216	10.8911	10.5662	10.4762	10.9367	10.4799	10.2926	10.8526	10.307	10.2791	11.0609	10.5422	10.1759	10.8755	10.6364
1	M1 UpD0 UpD6 Quiescence Vesicle SerumResponse	AKAP8	89.899	10.3029	10.5321	10.3306	9.28968	9.53512	9.35183	9.6512	9.54019	9.41593	9.53282	9.72071	9.41977	9.30981	9.61519	9.4193	9.4828	9.72525	9.4431	9.35635	9.56265	9.38143	9.03624	10.0605	9.57866
1	M1 UpD0 UpD6 Quiescence Vesicle SerumResponse	APH1A	89.899	11.4214	11.6331	11.2381	10.5293	11.033	10.5941	12.2312	11.43	11.1086	10.8986	11.4307	11.2594	10.8457	11.5285	11.1608	10.9023	11.6003	11.0968	11.0011	11.512	11.1583	10.8896	11.244	10.9811
1	M1 UpD0 UpD6 Quiescence Vesicle SerumResponse	ARHGEF2	89.899	12.8613	12.8866	12.8169	11.9333	11.9078	11.679	12.3114	12.3169	11.806	11.7096	12.3622	12.1004	11.8255	12.4672	12.1425	11.4077	12.274	12.1949	11.5057	12.4507	12.1809	11.6808	12.4311	12.2892
1	M1 UpD0 UpD6 Quiescence Vesicle SerumResponse	ARMC7	89.899	9.56715	9.43748	9.27044	8.46694	8.71416	8.46586	9.92501	9.62895	9.26305	9.04659	9.5263	9.30842	9.089	9.61751	9.20487	9.12903	9.66779	9.24131	9.22859	9.66244	9.12368	9.09678	9.47081	9.27106
1	M1 UpD0 UpD6 Quiescence Vesicle SerumResponse	ATG16L1	89.899	9.99257	10.2807	10.1	9.0958	9.64086	9.29638	9.74847	9.75052	9.47976	9.37285	9.70316	9.55942	9.31436	9.61926	9.50124	9.43296	9.70758	9.5586	9.40599	9.63346	9.58868	9.44191	9.7619	9.64649
1	M1 UpD0 UpD6 Quiescence Vesicle SerumResponse	ATG2A	89.899	9.57475	9.98894	9.66257	8.88329	8.95587	8.90362	10.3376	9.42066	9.05804	8.86772	9.49514	9.21713	9.03603	9.32088	9.39519	8.81211	9.2733	9.17876	8.74928	9.45955	9.22572	8.99369	9.51729	9.34959
1	M1 UpD0 UpD6 Quiescence Vesicle SerumResponse	BAIAP2L2	89.899	8.51897	8.40854	8.47313	8.0462	8.01605	8.15752	8.07992	7.96712	8.01834	7.8985	7.96119	7.97426	8.02973	8.03904	8.07501	7.98151	8.10281	8.07955	7.98953	8.11759	7.98407	8.07761	8.08869	8.01801
1	M1 UpD0 UpD6 Quiescence Vesicle SerumResponse	C11orf68	89.899	9.1381	9.36598	9.06938	8.51043	8.39027	8.40029	9.02603	8.8298	8.39953	8.45413	8.7385	8.65522	8.27544	8.59213	8.58811	8.33926	8.51921	8.57337	8.28737	8.77292	8.62439	8.57032	9.01634	8.70861
1	M1 UpD0 UpD6 Quiescence Vesicle SerumResponse	C8orf82	89.899	8.56987	9.38774	9.04932	8.36331	8.5109	8.37328	9.80337	8.57118	8.57366	8.472	8.69738	8.52127	8.3729	8.57361	8.71156	8.46073	8.53214	8.57791	8.40007	8.54131	8.42031	8.31344	8.65354	8.54454
1	M1 UpD0 UpD6 Quiescence Vesicle SerumResponse	CABIN1	89.899	9.2137	9.6044	9.36442	8.53587	8.78241	8.66271	10.3842	8.92763	8.6902	8.5115	9.03345	8.72993	8.67506	9.09623	8.78602	8.47241	9.02071	8.77669	8.48709	9.06646	8.82988	8.59628	8.97858	8.80347
1	M1 UpD0 UpD6 Quiescence Vesicle SerumResponse	CDIPT	89.899	9.54121	10.0776	9.79149	8.9212	9.29874	9.13362	9.56728	9.5853	9.36346	9.15813	9.54835	9.43629	9.01254	9.52203	9.56161	9.22704	9.58	9.37884	9.1945	9.53454	9.18784	9.22116	9.75991	9.32159
1	M1 UpD0 UpD6 Quiescence Vesicle SerumResponse	CHPF2	89.899	8.99086	9.61385	9.29814	8.29452	8.8056	8.63542	10.9218	9.37326	9.0216	8.89736	9.36453	9.03905	8.50673	8.9386	8.85325	8.71434	9.05424	8.72097	9.09334	9.60538	9.24279	9.43629	10.0836	9.53528
1	M1 UpD0 UpD6 Quiescence Vesicle SerumResponse	COG4	89.899	9.19136	9.3804	9.29479	8.86469	9.00505	8.69738	9.44219	9.11562	8.76715	8.63378	9.11317	9.02806	8.89648	9.27805	9.28818	8.7183	9.17692	8.97858	8.90957	9.08337	8.98341	8.67086	9.40105	8.95527
1	M1 UpD0 UpD6 Quiescence Vesicle SerumResponse	DENND1C	89.899	9.52576	9.63285	9.37148	8.48416	8.62939	8.45589	9.63326	8.7413	8.45454	8.31784	8.74146	8.55603	8.49958	8.94695	8.81324	8.41895	8.79251	8.71838	8.54483	8.9162	8.68182	8.45483	8.69899	8.59541
1	M1 UpD0 UpD6 Quiescence Vesicle SerumResponse	DMWD	89.899	8.90731	9.21235	8.8399	8.34765	8.61224	8.34152	9.32399	8.67091	8.58721	8.5482	8.5076	8.51009	8.19777	8.51118	8.52726	8.27684	8.8692	8.6355	8.19662	8.60878	8.64635	8.33789	8.80322	8.62846
1	M1 UpD0 UpD6 Quiescence Vesicle SerumResponse	FLT3LG	89.899	9.09623	9.05795	9.03449	8.59474	8.48564	8.39463	9.29231	8.70878	8.39419	8.51671	8.62617	8.63385	8.34069	8.86102	8.62563	8.30261	8.87539	8.39	8.28805	8.8772	8.81226	8.30737	8.90673	8.60769
1	M1 UpD0 UpD6 Quiescence Vesicle SerumResponse	GHDC	89.899	10.2777	10.5399	10.1904	8.8895	9.38181	9.06501	9.63326	9.87886	9.31802	8.84526	9.82098	9.47179	8.86407	9.54571	9.33464	8.83557	9.59488	9.2467	9.16565	9.83795	9.29011	9.10682	9.84239	9.36311
1	M1 UpD0 UpD6 Quiescence Vesicle SerumResponse	GPS2	89.899	10.0344	10.2952	10.2247	9.23343	9.61353	9.24466	10.174	10.0661	9.39263	9.44899	10.2355	9.89832	9.7272	10.3736	9.87799	9.52125	10.1598	9.75381	9.65871	10.2756	9.83743	9.37424	10.1497	9.81038
1	M1 UpD0 UpD6 Quiescence Vesicle SerumResponse	KIAA0141	89.899	10.3882	10.3957	10.3298	9.27095	9.47906	9.28201	9.82329	9.55104	9.07952	9.23827	9.60404	9.54864	9.07752	9.31953	9.52677	8.9625	9.25144	9.36032	9.15207	9.44826	9.38618	9.45486	9.60213	9.40968
1	M1 UpD0 UpD6 Quiescence Vesicle SerumResponse	KIAA2013	89.899	10.8353	11.0903	10.6155	9.83177	10.2843	9.77961	12.0073	10.6327	10.5029	10.3927	10.7754	10.4791	10.0457	10.2909	10.2029	10.1655	10.4629	10.2058	10.7533	10.9388	10.731	11.2014	11.2247	10.98
1	M1 UpD0 UpD6 Quiescence Vesicle SerumResponse	LRPAP1	89.899	10.2261	10.3416	9.99213	8.80587	9.24646	9.00617	10.2812	9.77993	9.46819	9.41446	9.78834	9.51051	9.26057	9.67659	9.47959	9.31277	9.93822	9.48756	10.1015	10.5298	10.1123	10.1432	10.701	10.576
1	M1 UpD0 UpD6 Quiescence Vesicle SerumResponse	MED25	89.899	9.54237	9.74178	9.3544	8.88359	9.02723	8.93029	11.3077	9.53567	9.11739	8.8783	9.5275	9.2577	8.72718	9.35014	9.03363	8.68927	9.23754	8.9995	8.78511	9.40315	9.12818	8.87578	9.613	9.27634
1	M1 UpD0 UpD6 Quiescence Vesicle SerumResponse	MICAL1	89.899	10.9108	10.9587	10.8353	9.26659	9.78568	9.24718	11.8168	10.0849	9.49063	9.15665	9.79118	9.50083	9.2787	9.99917	10.004	8.96716	10.123	9.81673	9.12013	10.4404	9.65312	9.13176	10.4048	9.62277
1	M1 UpD0 UpD6 Quiescence Vesicle SerumResponse	MIR1185-1	89.899	8.85541	9.09492	8.76404	8.63527	8.51015	8.57505	10.4122	8.81023	8.68035	8.69698	8.67823	8.5289	8.6708	8.75656	8.63785	8.86143	8.73717	8.69916	8.61672	9.28525	8.81947	9.54394	9.68878	9.20403
1	M1 UpD0 UpD6 Quiescence Vesicle SerumResponse	MUL1	89.899	10.1608	10.4672	9.96905	9.55343	9.84919	9.65033	10.2519	10.3583	10.0781	10.0585	10.4055	10.1308	9.86011	10.0812	9.86926	9.93389	10.0938	9.8428	10.0017	10.2949	10.0485	10.0275	10.4383	10.1603
1	M1 UpD0 UpD6 Quiescence Vesicle SerumResponse	NAA60	89.899	9.67803	9.94732	9.68954	9.28664	9.29502	9.07281	11.5884	9.85029	9.42732	9.44366	9.76737	9.56504	9.40396	9.93326	9.53095	9.32045	9.77778	9.50458	9.37148	9.80984	9.46379	9.2407	9.82604	9.29764
1	M1 UpD0 UpD6 Quiescence Vesicle SerumResponse	PIP5K1C	89.899	9.29974	9.33259	9.07005	8.47533	8.6902	8.60505	9.99541	9.56278	9.16696	9.20315	9.17517	9.33175	8.80347	9.3263	9.06888	8.68624	9.28234	8.88783	8.75564	9.23957	9.18138	8.93878	9.55104	9.22208
1	M1 UpD0 UpD6 Quiescence Vesicle SerumResponse	PTDSS2	89.899	9.11659	9.68954	9.31339	8.64843	9.12954	8.90595	9.71568	9.55378	9.15135	8.92933	9.27304	9.13082	8.8396	9.29273	9.02838	9.08171	9.29024	9.03966	9.09935	9.36073	9.26953	8.9605	9.43226	9.04349
1	M1 UpD0 UpD6 Quiescence Vesicle SerumResponse	PTOV1	89.899	11.6437	11.7408	11.4091	10.6709	10.691	10.5051	10.9635	10.9442	10.6284	10.5749	10.7021	10.5822	10.3685	10.9625	10.7954	10.33	10.6545	10.5894	10.2624	11.2181	10.7127	10.5166	11.2691	10.8083
1	M1 UpD0 UpD6 Quiescence Vesicle SerumResponse	RGL2	89.899	9.71486	10.1636	9.87104	8.4355	8.41256	8.34667	9.04191	8.52595	8.4373	8.27519	8.41793	8.34968	8.32248	8.69372	8.58293	8.34386	8.74969	8.49731	8.22599	8.74978	8.59098	8.36008	8.83439	8.52396
1	M1 UpD0 UpD6 Quiescence Vesicle SerumResponse	RNF10	89.899	9.66366	10.1678	10.0409	9.00473	9.29182	9.22185	9.32938	9.75087	9.18192	9.08145	9.56589	9.08431	8.86728	9.47906	9.24814	8.91641	9.57026	9.16844	9.09603	9.6226	9.31887	8.94148	9.80193	9.24452
1	M1 UpD0 UpD6 Quiescence Vesicle SerumResponse	RNF31	89.899	10.323	10.5587	10.2443	9.60152	9.86577	9.48347	10.6184	10.2055	9.52536	9.51539	10.1389	10.0486	9.38586	9.99885	9.96148	9.42139	10.2587	9.71899	9.53834	10.2454	9.99036	9.46027	10.3794	9.77047
1	M1 UpD0 UpD6 Quiescence Vesicle SerumResponse	SH2B1	89.899	9.37948	9.6497	9.64984	8.43032	8.52709	8.40143	9.06622	8.66046	8.59453	8.40112	8.57805	8.42405	8.15679	8.38408	8.49829	8.24209	8.78	8.51654	8.47685	8.73969	8.45407	8.35126	8.76106	8.73422
1	M1 UpD0 UpD6 Quiescence Vesicle SerumResponse	SLC10A3	89.899	9.80498	10.2747	9.75673	8.96502	9.09744	9.00617	11.4038	10.4118	9.96907	9.62242	9.98205	9.7658	9.28393	10.0797	9.70176	9.42587	10.0314	9.58797	9.30361	10.1528	9.66655	9.04694	10.1553	9.55692
1	M1 UpD0 UpD6 Quiescence Vesicle SerumResponse	SMARCB1	89.899	10.8707	10.3043	10.795	9.89946	9.76377	9.7538	11.1891	10.2958	9.94872	9.90123	10.323	10.2898	9.87525	10.2847	10.1666	10.0189	10.2958	10.4092	10.4776	10.4267	10.6654	10.6129	10.4372	10.9334
1	M1 UpD0 UpD6 Quiescence Vesicle SerumResponse	SMARCC2	89.899	11.0823	11.6957	11.2071	9.6889	10.2037	9.85327	11.914	10.4857	10.121	9.66312	10.5393	10.3169	9.87485	10.3984	10.5261	9.8776	10.4651	10.4227	9.79561	10.4852	10.3888	9.70622	10.5083	10.0236
1	M1 UpD0 UpD6 Quiescence Vesicle SerumResponse	SP2	89.899	9.613	9.49188	9.34976	8.76715	9.12569	8.80082	9.66562	9.69583	9.49456	9.29825	9.46224	9.45795	9.05435	9.53131	9.29526	9.08061	9.53736	9.27634	9.06267	9.61415	9.30524	9.11894	9.62128	9.45081
1	M1 UpD0 UpD6 Quiescence Vesicle SerumResponse	SPTAN1	89.899	11.2504	11.1996	11.033	10.2242	10.2242	10.038	11.3027	10.4101	10.2715	10.3765	10.4279	10.6495	9.9084	10.3534	10.6166	9.86406	10.4375	10.3986	9.8751	10.5785	10.777	10.0033	10.579	10.64
1	M1 UpD0 UpD6 Quiescence Vesicle SerumResponse	SRRM2	89.899	12.626	12.1799	12.5177	11.4677	11.5926	11.4314	12.3225	12.0672	11.892	11.4983	11.8273	11.675	11.584	11.9871	11.9515	11.5365	12.0345	12.0018	11.2669	12.4732	12.1335	11.512	12.4448	12.0073
1	M1 UpD0 UpD6 Quiescence Vesicle SerumResponse	TAPBPL	89.899	9.1398	9.89239	9.75241	8.76909	8.79706	8.97191	9.95613	9.54679	9.24225	9.34179	9.47528	9.3544	9.04274	9.36827	9.15836	9.02371	9.38091	9.03461	9.39726	10.0162	9.60998	9.57557	10.3861	10.006
1	M1 UpD0 UpD6 Quiescence Vesicle SerumResponse	TBC1D10A	89.899	9.10011	9.43329	9.09755	8.76731	8.40807	8.43762	9.68878	8.83218	8.38532	8.48073	8.90018	8.64635	8.57046	8.88042	8.73247	8.42059	8.75013	8.56334	8.48016	8.80124	8.74289	8.72147	8.63439	8.59521
1	M1 UpD0 UpD6 Quiescence Vesicle SerumResponse	TEPSIN	89.899	9.28244	9.49726	9.5821	8.13849	8.34728	8.30005	10.0901	8.54011	8.39681	8.25376	8.54454	8.3679	8.30301	8.46457	8.49719	8.25988	8.40409	8.52441	8.27551	8.58823	8.51544	8.30312	8.76723	8.54403
1	M1 UpD0 UpD6 Quiescence Vesicle SerumResponse	TMEM238	89.899	10.1409	10.2277	10.0122	9.54625	9.42308	9.05724	10.1879	9.83031	9.32033	9.4344	9.76827	9.34685	9.41509	9.93462	9.43015	9.45913	10.0212	9.56728	9.68595	10.4122	9.99183	10.2373	10.6476	10.4366
1	M1 UpD0 UpD6 Quiescence Vesicle SerumResponse	TMEM80	89.899	9.55577	9.76162	9.84618	8.48784	8.79332	8.55818	9.22092	9.03117	8.63582	8.62666	8.95724	8.81742	8.57158	8.81863	8.75204	8.49258	8.72344	8.82124	8.56127	9.10189	8.77742	8.74486	9.02975	8.8389
1	M1 UpD0 UpD6 Quiescence Vesicle SerumResponse	TMUB1	89.899	10.7577	11.4364	10.9141	10.3081	10.3032	10.2428	12.6783	11.164	10.5616	10.4048	11.1545	10.6662	10.3431	11.1691	10.7835	10.389	10.9343	10.7003	10.4804	11.0202	10.8777	10.2719	11.2603	10.8667
1	M1 UpD0 UpD6 Quiescence Vesicle SerumResponse	TOP2B	89.899	12.492	12.5355	12.321	11.5702	12.114	12.116	12.0036	11.573	11.9235	11.8346	11.6428	11.9813	11.7023	11.7294	11.8248	11.5545	11.8841	11.6452	11.2711	11.8903	11.5501	11.8195	12.193	11.7583
1	M1 UpD0 UpD6 Quiescence Vesicle SerumResponse	TRIR	89.899	11.5694	11.7972	11.7036	11.1961	10.7942	10.9058	12.2692	11.1059	11.0261	10.9755	11.2917	11.0272	11.0075	11.2014	11.1505	10.8967	11.1186	11.0869	11.0722	11.2006	11.0971	10.8287	11.0214	11.127
1	M1 UpD0 UpD6 Quiescence Vesicle SerumResponse	TRMT44	89.899	8.3081	8.32107	8.48429	8.24315	8.23578	8.29208	8.62294	8.53377	8.35858	8.35172	8.31577	8.24889	8.21397	8.48102	8.29295	8.3657	8.28364	8.18916	8.47443	8.82232	8.45083	8.78381	9.19177	8.86682
1	M1 UpD0 UpD6 Quiescence Vesicle SerumResponse	UCKL1	89.899	11.5891	11.5891	11.5127	10.5279	10.4832	10.1617	10.7053	10.635	10.2443	10.2347	10.6699	10.1856	10.2144	10.6216	10.3444	10.1565	10.8943	10.5055	10.2933	10.8509	10.5749	10.121	11.0419	10.6011
1	M1 UpD0 UpD6 Quiescence Vesicle SerumResponse	VPS18	89.899	9.17402	9.40434	9.14703	8.47196	8.67793	8.62606	10.109	9.46805	9.17681	8.80223	9.41668	9.24585	8.68682	9.30257	9.12329	8.77872	9.40105	8.90673	8.81736	9.45191	9.10843	8.66555	9.41962	8.97858
1	M1 UpD0 UpD6 Quiescence Vesicle SerumResponse	VPS39	89.899	9.32125	9.39124	9.032	8.7831	8.89909	8.55234	9.89384	9.22659	8.76615	8.59604	9.20696	9.00768	8.5218	8.87728	8.79904	8.44239	9.06888	8.76691	8.58729	8.96151	8.65434	8.75206	9.17112	8.85999
1	M1 UpD0 UpD6 Quiescence Vesicle SerumResponse	WDR45	89.899	9.16857	9.42243	9.30231	8.66637	8.75418	8.64391	10.8648	8.98681	8.68934	8.70379	9.13701	8.95196	8.72535	9.09325	8.85952	8.80814	9.20512	8.84621	8.90205	9.67739	9.20824	9.60944	10.2447	9.64108
1	M1 UpD0 UpD6 Quiescence Vesicle SerumResponse	ZFYVE27	89.899	9.15217	9.00859	9.00131	8.30839	8.41334	8.25596	9.38763	8.69899	8.42934	8.28438	8.64979	8.42084	8.49033	8.54694	8.42155	8.32105	8.45644	8.37424	8.36406	8.48367	8.45443	8.2852	8.53064	8.33327
1	M1 UpD0 UpD6 Quiescence Vesicle SerumResponse	ANAPC13	87.8788	12.2651	12.419	12.2234	11.5832	11.7728	11.9157	12.1613	11.7575	12.0195	11.4611	11.914	11.7964	11.505	11.7604	11.692	11.6689	11.7892	11.8168	11.5689	11.8521	11.7681	11.6858	12.0995	11.9008
1	M1 UpD0 UpD6 Quiescence Vesicle SerumResponse	APOBEC3C	87.8788	9.74648	10.3324	9.51255	9.1019	9.23862	9.25179	11.1934	9.52839	9.50604	9.39576	9.33544	9.47069	9.12707	9.26742	9.30445	8.93267	9.02806	9.0487	9.11059	9.32879	9.44748	9.28516	9.47896	9.5696
1	M1 UpD0 UpD6 Quiescence Vesicle SerumResponse	AVPR2	87.8788	8.53762	8.70053	8.56761	8.48453	8.55848	8.47082	9.60455	8.42811	8.44496	8.53537	8.56048	8.53755	8.56082	8.70084	8.48288	8.55921	8.69628	8.53747	8.6192	9.00567	8.56327	9.20315	9.56035	9.11727
1	M1 UpD0 UpD6 Quiescence Vesicle SerumResponse	BTN2A2	87.8788	8.96476	8.92057	8.90271	8.60688	8.47827	8.39463	8.76375	8.2223	8.23408	8.33013	8.29355	8.30389	8.45982	8.37666	8.39467	8.52235	8.35001	8.40074	8.71029	8.49873	8.53445	8.9548	8.63393	8.72461
1	M1 UpD0 UpD6 Quiescence Vesicle SerumResponse	CD180	87.8788	9.05954	8.81466	8.66093	8.45185	8.24534	8.42295	9.88732	8.5544	8.38163	8.50975	8.70598	8.46785	8.57581	8.73367	8.5511	8.60114	8.67299	8.71952	8.61062	8.90009	8.66742	8.78232	8.931	8.7324
1	M1 UpD0 UpD6 Quiescence Vesicle SerumResponse	CLN3	87.8788	8.53882	8.96878	8.64935	8.59598	8.47924	8.38849	9.85098	8.7771	8.48294	8.57385	8.77029	8.53954	8.43563	8.77383	8.327	8.49991	8.92151	8.55086	8.63612	9.03788	8.93291	8.70051	9.09653	9.1532
1	M1 UpD0 UpD6 Quiescence Vesicle SerumResponse	DAP	87.8788	9.89368	9.96834	9.59108	9.48756	9.48265	9.10592	12.6613	9.36427	9.3436	9.44524	9.72241	9.50619	9.51051	10.026	9.50708	9.52215	9.94235	9.66057	9.75601	10.3266	9.82345	10.0762	10.4867	10.0357
1	M1 UpD0 UpD6 Quiescence Vesicle SerumResponse	DCAF11	87.8788	10.3464	10.2932	10.3617	9.16091	9.17073	9.32095	9.57073	9.04239	9.17114	8.99013	8.99549	9.08843	9.0471	9.18667	9.21921	8.97576	9.15292	9.16382	8.90915	9.2084	9.06734	9.26372	9.21893	9.07892
1	M1 UpD0 UpD6 Quiescence Vesicle SerumResponse	EBAG9	87.8788	11.4523	11.7794	11.5339	11.3487	11.4572	11.2465	12.1889	11.0464	11.1832	11.3413	11.2201	11.0406	11.387	11.1282	10.7254	11.5174	11.1893	10.9333	11.6437	11.3278	11.3622	11.865	11.6767	11.5425
1	M1 UpD0 UpD6 Quiescence Vesicle SerumResponse	FAM13A-AS1	87.8788	8.69406	8.65062	8.71612	8.15842	8.11614	8.09878	8.65062	8.07304	8.07625	8.07396	8.09173	8.08106	8.20021	8.14241	8.02813	8.08635	8.06717	8.18334	8.20934	8.10671	8.14416	8.13896	8.34804	8.09293
1	M1 UpD0 UpD6 Quiescence Vesicle SerumResponse	GRK6	87.8788	8.73609	9.03888	8.88119	8.54748	8.74234	8.35433	9.52022	8.58499	8.38327	8.33492	8.70991	8.40187	8.51139	9.1754	8.679	8.71265	9.33628	8.90314	8.9016	9.42095	9.28716	8.85711	9.66499	9.25854
1	M1 UpD0 UpD6 Quiescence Vesicle SerumResponse	H3F3AP6	87.8788	13.0345	13.4635	13.0454	11.9468	12.5904	12.2786	13.9091	12.4358	12.206	12.2351	12.5809	12.1425	12.5103	13.103	12.3084	12.7029	13.5503	13.0002	13.1772	13.7108	13.3405	13.6247	13.7546	13.641
1	M1 UpD0 UpD6 Quiescence Vesicle SerumResponse	MAGED2	87.8788	8.65395	8.82778	8.66474	8.53685	8.48913	8.62681	9.70874	8.60277	8.54251	8.40714	8.58412	8.60843	8.35641	8.51084	8.55504	8.4885	8.62939	8.58044	8.63905	8.84846	8.72286	9.05547	9.10024	9.13499
1	M1 UpD0 UpD6 Quiescence Vesicle SerumResponse	MBNL3	87.8788	8.64919	9.04322	8.52709	8.31832	8.44092	8.41233	8.91279	8.5059	8.27013	8.37317	8.41066	8.28721	8.39793	8.58545	8.42191	8.32254	8.72364	8.44936	8.66008	8.94695	8.71773	8.64017	8.9746	8.66975
1	M1 UpD0 UpD6 Quiescence Vesicle SerumResponse	MED23	87.8788	9.72015	9.52434	9.75192	9.09866	9.33568	9.3614	9.66895	9.51475	9.62926	9.30869	9.49362	9.68501	9.01312	9.02441	9.36046	9.20569	9.28923	9.29526	9.15836	9.24814	9.43547	9.42181	9.68332	9.58281
1	M1 UpD0 UpD6 Quiescence Vesicle SerumResponse	PIGN	87.8788	9.34193	8.94558	8.93839	9.01376	9.00366	8.89969	9.90726	8.84381	8.83046	8.79995	9.08213	8.77635	9.00735	9.28357	8.91777	9.04772	9.23874	9.06491	9.19058	9.56407	9.36089	9.0953	9.57903	9.42479
1	M1 UpD0 UpD6 Quiescence Vesicle SerumResponse	RNF166	87.8788	8.7069	8.67793	8.626	8.29979	8.18392	8.1243	9.2169	8.27197	8.06789	8.13739	8.3983	8.36	8.28487	8.66932	8.42988	8.3977	8.59956	8.43236	8.39539	8.67989	8.61383	8.54935	8.77934	8.71349
1	M1 UpD0 UpD6 Quiescence Vesicle SerumResponse	RPL23AP37	87.8788	9.47803	9.86013	9.66517	9.06044	8.89541	8.88075	10.0121	8.90166	8.85177	8.82871	8.85567	8.88163	8.94003	8.99969	8.69988	9.02682	8.75813	9.12441	9.07988	8.93406	8.97162	9.42576	8.85106	9.1169
1	M1 UpD0 UpD6 Quiescence Vesicle SerumResponse	S100PBP	87.8788	10.4753	10.3951	10.5804	10.0721	10.0359	9.92829	11.1022	10.1263	9.92501	9.73062	10.3483	10.1861	10.1941	10.4486	10.3098	10.2245	10.4694	10.4944	10.4337	10.7675	10.3394	11.0772	11.1171	10.885
1	M1 UpD0 UpD6 Quiescence Vesicle SerumResponse	UFC1	87.8788	11.655	12.0857	11.4769	11.401	11.3771	11.0561	12.6983	11.74	11.2674	11.4272	11.7096	11.4227	11.4343	11.7255	11.375	11.468	11.876	11.5416	11.5402	12.2114	11.6251	11.8603	12.0232	11.7279
1	M1 UpD0 UpD6 Quiescence Vesicle SerumResponse	WASH7P	87.8788	8.60808	8.71694	8.50394	8.46111	8.49564	8.38691	9.94082	8.45341	8.36327	8.39723	8.57466	8.38498	8.42934	8.71821	8.38968	8.49614	8.6018	8.41514	8.63479	8.96755	8.57547	8.90641	9.40595	8.75886
1	M1 UpD0 UpD6 Quiescence Vesicle SerumResponse	ZBTB7B	87.8788	8.55914	9.20696	8.70911	8.39827	8.41096	8.35205	9.49726	8.63779	8.2571	8.27762	8.44041	8.27231	8.30756	8.65419	8.30692	8.42136	8.79026	8.51333	8.71895	9.23414	8.7112	9.07604	9.35262	9.01821
1	M1 UpD0 UpD6 Quiescence Vesicle SerumResponse	ZNF473	87.8788	9.26789	9.66779	9.27117	9.09389	9.18105	8.87362	10.2428	9.15599	8.95819	9.15358	9.22594	8.95499	9.00131	9.23437	8.95246	9.15836	9.45692	9.0455	9.22485	9.84207	9.30257	9.8838	10.1729	9.6497
1	M1 UpD0 UpD6 Quiescence Vesicle SerumResponse	ACO2	86.8687	9.66531	10.0019	9.68238	9.55845	9.54454	9.61713	10.7697	9.69549	9.79597	9.53239	9.50379	9.73328	9.37352	9.75103	9.67569	9.65298	9.80529	9.65058	9.86677	10.0523	10.4386	9.90745	10.32	10.2888
1	M1 UpD0 UpD6 Quiescence Vesicle SerumResponse	ANAPC5	86.8687	12.149	12.5024	12.111	11.8574	12.3169	11.7583	12.3867	12.3237	11.8222	11.7984	12.4821	12.0467	11.9592	12.4709	12.0445	12.1769	12.5863	12.0662	12.3879	12.7521	12.4321	12.3611	12.9817	12.5685
1	M1 UpD0 UpD6 Quiescence Vesicle SerumResponse	ASB6	86.8687	9.01977	8.8953	8.8886	8.13577	8.29989	8.29019	8.83066	8.57686	8.60604	8.23365	8.51231	8.62508	8.20036	8.37714	8.38506	8.15347	8.37957	8.29172	8.23946	8.44591	8.46381	8.26049	8.49232	8.47064
1	M1 UpD0 UpD6 Quiescence Vesicle SerumResponse	AUP1	86.8687	10.2997	10.9358	10.8855	10.4156	10.0801	10.3873	13.0226	10.5894	10.7635	10.353	10.5775	10.6022	10.2542	10.5689	10.7537	10.3873	10.4932	10.7029	10.8865	10.9508	10.9902	10.5549	11.1539	11.0393
1	M1 UpD0 UpD6 Quiescence Vesicle SerumResponse	BSCL2	86.8687	10.9124	10.8755	10.6701	10.1715	10.4177	10.1488	12.4031	11.0997	10.3324	10.4408	11.244	10.6355	10.5804	10.9347	10.4287	10.5266	11.0371	10.6104	11.2808	11.8486	11.2472	11.8496	12.0878	11.7724
1	M1 UpD0 UpD6 Quiescence Vesicle SerumResponse	CTDSP1	86.8687	11.553	12.0009	11.595	10.0063	9.93448	9.94063	11.0579	10.5794	10.2407	10.1263	10.6759	10.5749	10.0611	10.6201	10.7447	10.1711	10.6125	10.498	10.2195	10.515	10.6273	10.2531	10.5319	10.7609
1	M1 UpD0 UpD6 Quiescence Vesicle SerumResponse	EDEM2	86.8687	9.89191	9.85205	9.99637	9.13895	9.44469	9.49188	10.4297	9.81643	9.57572	9.36382	9.68674	9.63455	9.30948	9.81512	9.41496	9.5491	10.1544	9.95241	10.3051	11.1177	10.672	11.1799	11.6851	11.3977
1	M1 UpD0 UpD6 Quiescence Vesicle SerumResponse	GNAS	86.8687	13.9183	14.0864	14.091	13.697	14.0221	14.1386	14.1579	14.0779	14.0455	13.8734	14.0291	14.1115	13.7083	14.1115	13.7841	13.7718	14.0455	13.7742	13.8964	14.2185	14.1501	14.1842	14.2989	14.4607
1	M1 UpD0 UpD6 Quiescence Vesicle SerumResponse	GUSB	86.8687	11.0145	11.3139	10.8419	10.5777	10.9789	10.6873	11.692	11.0765	10.7305	10.6281	11.2835	10.7138	10.7325	11.233	10.7733	10.7931	11.303	10.9438	11.2045	11.7558	11.5509	11.7566	12.2215	11.9536
1	M1 UpD0 UpD6 Quiescence Vesicle SerumResponse	INO80	86.8687	9.59049	9.96259	9.71502	9.05615	9.30426	8.99026	10.4127	9.39012	9.76051	9.21904	9.32424	9.27923	9.07113	9.2801	9.23511	9.14343	9.32405	9.25927	9.13742	9.28315	9.48131	8.90796	9.28166	9.37622
1	M1 UpD0 UpD6 Quiescence Vesicle SerumResponse	IP6K1	86.8687	10.3429	10.1082	10.162	9.46848	9.61956	9.33349	10.5682	10.2715	10.5362	10.052	10.5914	10.4897	9.77735	10.0655	10.313	9.59727	10.0557	9.91813	9.75352	10.1224	10.3316	9.71449	10.2474	10.4732
1	M1 UpD0 UpD6 Quiescence Vesicle SerumResponse	KDM2A	86.8687	11.4868	11.0784	11.0638	9.88255	10.2803	10.3058	11.1292	10.6924	10.3017	10.2809	10.6083	10.3912	10.2242	10.2958	10.1881	10.0671	10.3658	10.1317	9.97831	10.4449	10.419	10.0908	10.6359	10.3502
1	M1 UpD0 UpD6 Quiescence Vesicle SerumResponse	KIF13B	86.8687	9.53296	9.74872	9.36465	8.9921	9.22594	8.8705	9.49837	9.33058	8.94926	9.26597	9.25223	9.31079	9.16027	9.4071	9.25169	9.38876	9.56453	9.23414	9.50645	9.86422	9.67292	9.57838	10.2685	9.89368
1	M1 UpD0 UpD6 Quiescence Vesicle SerumResponse	KRTCAP2	86.8687	12.7445	12.271	12.3006	11.6875	12.0241	11.6174	14.1776	12.2786	11.587	12.0628	12.4203	11.969	12.2752	12.3853	11.8974	12.1979	12.4972	11.7165	12.8479	13.2872	12.4399	13.2937	13.4981	12.9402
1	M1 UpD0 UpD6 Quiescence Vesicle SerumResponse	LCNL1	86.8687	8.08221	8.23485	8.13233	8.02826	8.01514	7.96418	8.36714	8.21769	7.94728	8.03816	8.0524	8.20113	8.13837	8.16656	8.07863	8.13451	8.25517	8.0656	8.20803	8.61497	8.39116	8.68492	8.86896	9.00526
1	M1 UpD0 UpD6 Quiescence Vesicle SerumResponse	LOC100133034	86.8687	8.155	8.31254	8.1336	8.06176	8.09323	8.18478	8.49366	8.12136	8.18121	8.00896	8.16251	8.08499	8.05505	8.31916	8.07974	8.14088	8.6316	8.14668	8.85576	9.61211	8.64484	9.67513	10.4786	9.41657
1	M1 UpD0 UpD6 Quiescence Vesicle SerumResponse	MBD1	86.8687	9.12073	9.14896	8.93408	8.7021	8.88475	8.6094	10.1659	9.14083	8.73903	8.71693	9.14658	8.87168	8.85758	9.06904	8.75575	8.83097	9.29341	8.88427	9.15524	9.31479	9.19265	9.23809	9.56912	9.1855
1	M1 UpD0 UpD6 Quiescence Vesicle SerumResponse	MGAT1	86.8687	11.1731	11.1748	10.8447	10.1701	10.4857	10.0858	12.2774	11.1133	10.9766	10.4415	11.0227	10.8779	10.4493	11.0806	10.6773	10.4867	11.2065	10.515	11.1714	11.7213	11.3088	11.2674	11.9695	11.5108
1	M1 UpD0 UpD6 Quiescence Vesicle SerumResponse	NDUFB11	86.8687	12.1854	12.6073	12.5477	12.178	12.3355	12.3516	13.4544	12.5893	12.3853	12.1697	12.6186	12.382	12.242	12.6303	12.2267	12.3659	12.8495	12.446	12.6516	13.1566	12.7319	12.8629	13.2795	12.9235
1	M1 UpD0 UpD6 Quiescence Vesicle SerumResponse	OGFOD3	86.8687	8.69628	8.99676	8.95909	8.71868	8.94631	8.84389	10.4884	9.19798	9.002	8.75897	9.02043	8.72993	8.61041	8.95196	8.69046	8.54483	9.08772	8.84801	8.87462	9.24131	9.08134	8.77613	9.63075	9.26033
1	M1 UpD0 UpD6 Quiescence Vesicle SerumResponse	PLOD3	86.8687	10.1224	10.5744	9.9454	9.71618	10.003	9.66344	11.4348	10.3907	10.1886	9.9981	10.3456	10.0062	9.92893	10.4079	10.0172	10.079	10.335	10.0849	10.5979	11.1321	10.7078	10.6317	11.3068	10.9594
1	M1 UpD0 UpD6 Quiescence Vesicle SerumResponse	PRAF2	86.8687	8.92605	9.42538	8.94877	8.71846	9.0455	8.69907	10.3293	9.0265	8.63861	8.73255	9.07719	8.80647	8.82705	8.95361	8.75725	8.85799	9.05234	8.84686	8.95112	9.31968	8.9146	9.62018	9.95886	9.54483
1	M1 UpD0 UpD6 Quiescence Vesicle SerumResponse	RABAC1	86.8687	10.2958	11.303	10.4412	10.0232	10.3293	9.99417	11.3291	10.5176	10.2021	9.97467	10.6552	10.2122	10.0483	10.8937	10.4956	10.4568	11.1475	10.6851	11.2777	11.8786	11.493	11.9985	12.3622	12.0047
1	M1 UpD0 UpD6 Quiescence Vesicle SerumResponse	SPRYD3	86.8687	10.5835	9.93658	10.1451	9.82026	9.92563	9.73459	10.5525	10.4279	9.7401	10.3854	10.4635	10.092	10.2583	10.3194	10.0409	10.2773	10.4266	9.83209	10.3982	10.7109	10.1193	10.2777	10.523	10.2399
1	M1 UpD0 UpD6 Quiescence Vesicle SerumResponse	STK40	86.8687	11.9421	12.5378	12.1335	10.5689	10.7341	10.7114	11.9235	11.4004	11.4253	10.5888	11.1888	11.1133	10.5822	11.0237	11.0534	10.5065	11.0356	11.0114	10.6201	11.0188	11.1028	10.6037	11.0551	10.8483
1	M1 UpD0 UpD6 Quiescence Vesicle SerumResponse	SURF1	86.8687	10.0925	10.5467	10.1771	9.84799	10.1109	9.60874	10.4118	10.2884	9.7395	9.71449	10.3733	9.68332	9.65461	10.2884	9.88536	9.75295	10.584	9.6734	9.93851	10.8814	10.1409	10.2215	10.7749	10.4373
1	M1 UpD0 UpD6 Quiescence Vesicle SerumResponse	TMEM8A	86.8687	8.88768	9.20247	8.99783	8.45143	8.71239	8.68057	9.1955	9.05405	8.97439	8.40368	9.06166	8.80786	8.35092	9.35234	8.98987	8.63324	9.5491	8.91313	8.72408	9.82437	9.40924	9.09269	9.88536	9.5889
1	M1 UpD0 UpD6 Quiescence Vesicle SerumResponse	VPS16	86.8687	11.3571	10.8825	10.9462	10.5939	11.0683	10.6426	11.6828	11.258	10.4044	10.6905	11.0857	10.5453	10.9985	11.3145	10.6827	10.9874	11.2957	10.7556	11.3187	11.6542	10.7855	11.4409	11.8496	11.1463
1	M1 UpD0 UpD6 Quiescence Vesicle SerumResponse	ZNF263	86.8687	10.9027	11.0962	10.6628	9.9118	9.98187	9.71158	10.7339	10.1422	10.4555	10.0619	10.3357	10.1261	9.91131	10.1169	10.1491	10.13	10.2312	10.1528	9.95551	10.1213	10.2023	9.97925	10.1111	9.98641
1	M1 UpD0 UpD6 Quiescence Vesicle SerumResponse	ZNF500	86.8687	9.16424	9.33524	9.19854	8.41185	8.57999	8.52732	8.93215	8.81809	8.82769	8.53537	8.81947	8.77318	8.51118	8.68013	8.83046	8.46434	8.70091	8.76324	8.52035	8.74351	8.88601	8.63812	8.74108	8.7876
1	M1 UpD0 UpD6 Quiescence Vesicle SerumResponse	CYFIP2	85.8586	12.8559	12.9631	12.8757	11.486	11.9083	11.6939	12.1063	11.928	11.7904	11.3994	12.0557	12.008	11.2375	12.2219	12.0127	11.3264	12.2281	11.8944	11.3704	12.0918	11.8186	11.7691	12.1681	11.8088
1	M1 UpD0 UpD6 Quiescence Vesicle SerumResponse	FCGRT	85.8586	9.88929	10.4157	9.99688	8.35434	8.58123	8.50108	8.70241	8.61033	8.48498	8.2886	8.58612	8.36155	8.14734	8.64066	8.46845	8.18065	8.62655	8.37283	8.19043	8.72408	8.42064	8.33237	8.76213	8.42064
1	M1 UpD0 UpD6 Quiescence Vesicle SerumResponse	HS.128393	85.8586	8.35905	8.57839	8.33338	8.47234	8.42243	8.50394	8.73976	8.61497	8.52757	8.35117	8.61095	8.36714	8.45799	8.44565	8.40179	8.43004	8.51815	8.49077	8.71529	9.13598	8.65734	9.32938	9.58013	9.03324
1	M1 UpD0 UpD6 Quiescence Vesicle SerumResponse	MANBAL	85.8586	10.1608	10.1538	9.98205	9.74561	10.1785	9.75321	10.089	10.5487	10.0583	10.0088	10.3895	9.95095	9.82846	10.2807	9.97222	9.8653	10.2184	9.95627	9.71519	10.5277	10.134	10.0692	10.6218	10.2275
1	M1 UpD0 UpD6 Quiescence Vesicle SerumResponse	PIGT	85.8586	9.8626	10.4668	9.81485	9.45177	9.68467	9.56324	10.163	10.57	9.9981	9.7781	10.5085	10.0576	9.55266	10.536	10.1127	9.92429	10.6731	10.0873	10.3496	10.8952	10.5649	10.8975	11.1799	10.8462
1	M1 UpD0 UpD6 Quiescence Vesicle SerumResponse	SDF4	85.8586	9.76981	10.0837	9.78127	9.23253	9.52553	9.17705	9.88762	10.1161	9.66071	9.47801	9.97134	9.66988	9.39676	10.1525	9.62615	9.69689	10.2517	9.73481	10.005	10.6627	10.338	10.0339	10.8134	10.4761
1	M1 UpD0 UpD6 Quiescence Vesicle SerumResponse	TMEM214	85.8586	9.28441	9.53442	9.25661	8.91751	9.28995	8.96121	9.77653	9.80323	9.20556	9.08026	9.6079	9.3594	9.16747	9.85063	9.51013	9.37996	9.90835	9.40333	9.90982	10.4949	10.38	10.0029	10.8369	10.5291
1	M1 UpD0 UpD6 Quiescence Vesicle SerumResponse	UBXN4	85.8586	11.493	11.7973	11.5643	11.7583	11.4327	11.7917	11.5901	11.9157	11.5509	11.0903	11.8009	11.6712	11.3501	11.772	11.5853	11.3447	11.7535	11.5702	11.8126	12.0965	11.9889	12.1031	12.5751	12.1013
1	M1 UpD0 UpD6 Quiescence Vesicle SerumResponse	VARS	85.8586	11.92	12.2816	11.9243	11.8346	12.1248	11.4572	12.8962	12.0561	11.9985	11.7558	11.8673	11.5441	11.3401	11.6575	11.7439	11.6106	12.0083	11.675	12.0836	12.396	12.272	11.3587	12.2796	12.0743
1	M1 UpD0 UpD6 Quiescence Vesicle SerumResponse	ZNF638	85.8586	8.5987	8.75013	8.80579	8.51715	8.50052	8.58357	9.41123	8.57677	8.8478	8.53039	8.44087	8.82677	8.56697	8.71514	8.69438	8.68477	8.68263	8.6164	8.82157	8.9896	8.86541	9.13344	9.37668	9.00633
1	M1 UpD0 UpD6 Quiescence Vesicle SerumResponse	ANKMY1	82.8283	10.4271	10.0249	10.7257	9.23202	9.25398	9.39999	9.24859	9.01738	8.97579	8.90408	9.12084	9.16817	9.11197	9.29672	9.38091	9.05286	9.29628	9.36762	9.00101	9.34943	9.03975	9.13383	9.32978	9.00043
1	M1 UpD0 UpD6 Quiescence Vesicle SerumResponse	LOC100133390	82.8283	9.81175	9.94006	9.63878	9.62546	9.33477	9.38647	9.5552	9.38876	9.12493	9.45728	9.21458	9.06122	9.40909	9.3661	9.22635	9.45346	9.36827	9.42308	9.60596	9.44776	9.12036	9.55364	9.58401	9.53113
1	M1 UpD0 UpD6 Quiescence Vesicle SerumResponse	RPL18P9	82.8283	8.97948	8.92245	8.96355	8.59023	8.44627	8.52732	9.28455	8.58593	8.47064	8.44617	8.4673	8.40986	8.53304	8.48434	8.48312	8.55834	8.4531	8.44627	8.71686	8.52628	8.42181	8.48385	8.43329	8.53039
1	M1 UpD0 UpD6 Quiescence Vesicle SerumResponse	CTCF	81.8182	10.1149	10.0415	9.94632	9.37655	9.71647	9.31953	10.8747	10.2201	9.79101	9.73382	10.0557	9.85916	9.80372	10.3502	9.72855	9.88101	10.2985	9.79118	9.95551	10.2017	9.98975	9.83743	10.1542	10.1375
1	M1 UpD0 UpD6 Quiescence Vesicle SerumResponse	DAG1	81.8182	9.17348	9.26942	9.04307	8.58708	8.63204	8.49077	10.9671	8.99655	8.97968	8.8424	8.90976	8.92442	8.70502	8.77071	8.66239	8.83227	8.8416	8.70176	8.73185	8.98322	8.835	8.6683	9.02594	8.8077
1	M1 UpD0 UpD6 Quiescence Vesicle SerumResponse	DGCR6L	81.8182	9.94964	10.367	9.80296	9.397	9.31253	9.01343	10.9493	9.71943	9.44139	9.4675	9.88637	9.44481	9.51996	9.70008	9.53849	9.33149	9.58447	9.35557	9.51696	9.7948	9.42913	9.45613	9.66578	9.58177
1	M1 UpD0 UpD6 Quiescence Vesicle SerumResponse	E4F1	81.8182	11.4998	11.4553	11.6531	10.6327	10.9149	10.5936	11.8273	11.4233	11.0857	10.92	11.5884	11.0104	10.9412	11.2536	10.8952	10.8716	11.2979	10.7695	11.0433	11.3767	10.7528	10.875	11.4444	11.0453
1	M1 UpD0 UpD6 Quiescence Vesicle SerumResponse	FARP2	81.8182	8.96207	8.7705	8.86728	8.43917	8.33707	8.31592	8.69778	8.4885	8.42664	8.33602	8.47811	8.31209	8.54509	8.52776	8.54614	8.41633	8.46702	8.31677	8.39539	8.55451	8.27026	8.42481	8.50734	8.52634
1	M1 UpD0 UpD6 Quiescence Vesicle SerumResponse	LOC728969	81.8182	9.5344	9.99007	9.55726	8.49977	8.69454	8.44426	10.0407	9.48927	8.86094	8.89239	9.17933	8.85852	8.81116	9.02133	8.61818	8.81502	8.9013	8.5493	8.71646	8.93603	8.71709	8.56816	9.03261	8.58247
1	M1 UpD0 UpD6 Quiescence Vesicle SerumResponse	POLR3H	81.8182	10.3145	10.9252	10.4911	9.42254	9.60777	9.33136	10.6863	10.3109	9.74969	10.2527	10.4647	10.0146	10.2428	10.1838	9.89667	10.3923	10.4553	9.80906	10.3103	10.456	9.97173	9.47139	10.4466	10.1007
1	M1 UpD0 UpD6 Quiescence Vesicle SerumResponse	PYHIN1	81.8182	9.125	8.82821	9.08958	8.24055	8.17636	8.291	8.49073	8.02907	8.07828	8.11161	8.03582	8.07677	8.18053	8.09091	8.12448	8.17433	8.25245	8.08934	8.16692	8.23856	8.30604	8.17787	8.21867	8.38007
1	M1 UpD0 UpD6 Quiescence Vesicle SerumResponse	RCE1	81.8182	9.70581	10.0692	9.64292	9.27955	9.46224	9.20973	10.9045	10.1208	9.54835	9.81571	10.0403	9.55335	9.53696	9.83583	9.31463	9.55117	9.86208	9.53567	9.6144	9.93004	9.47803	9.22196	9.91443	9.63311
1	M1 UpD0 UpD6 Quiescence Vesicle SerumResponse	SEC14L1P1	81.8182	9.25828	9.1699	8.76178	8.2979	8.42643	8.38954	9.01966	8.77991	8.69784	8.66794	8.65074	8.57491	8.52948	8.51671	8.45976	8.41829	8.46826	8.51213	8.46785	8.64893	8.37862	8.6883	8.79167	8.58663
1	M1 UpD0 UpD6 Quiescence Vesicle SerumResponse	SGF29	81.8182	9.38963	9.82149	9.4357	8.42118	8.54287	8.41663	10.0203	8.97143	8.68553	8.79169	8.97411	8.72365	8.65897	8.92389	8.57272	8.65363	8.87103	8.55141	8.69593	8.95184	8.6734	8.59449	8.89782	8.74816
1	M1 UpD0 UpD6 Quiescence Vesicle SerumResponse	TAOK3	81.8182	9.42181	9.11843	9.40693	9.22414	9.03715	9.2101	9.35818	8.93173	8.83641	8.93585	8.88892	8.92725	9.04648	9.00169	8.9903	9.0078	9.16879	9.15554	9.01264	9.07109	9.15631	9.20873	9.13724	9.41299
1	M1 UpD0 UpD6 Quiescence Vesicle SerumResponse	TCTA	81.8182	9.34377	9.88789	9.44048	8.55286	8.75571	8.5124	10.2099	9.27501	8.85411	8.83557	9.13772	8.89028	8.83046	9.01079	8.8762	8.69183	8.87143	8.77879	8.68028	8.98027	8.63586	8.90123	9.12796	8.71598
1	M1 UpD0 UpD6 Quiescence Vesicle SerumResponse	TRIM27	81.8182	9.75352	9.86118	9.65992	8.90063	8.97242	8.82963	10.2501	9.31051	9.10773	9.14186	9.30124	9.0945	9.00829	9.30361	9.1348	9.16291	9.21422	9.01514	9.21331	9.47886	9.2004	9.0576	9.40993	9.15583
1	M1 UpD0 UpD6 Quiescence Vesicle SerumResponse	ZNF688	81.8182	9.28758	9.57825	9.20121	8.55053	8.59417	8.44557	9.50179	9.16424	8.63957	8.78698	8.98161	8.63172	8.66587	8.84637	8.81039	8.68576	8.82269	8.57505	8.60781	8.90873	8.66145	8.7912	8.99173	8.77098
1	M1 UpD0 UpD6 Quiescence Vesicle SerumResponse	EEF1A2	80.8081	9.15777	8.84544	8.27702	7.93423	7.96888	7.91526	7.9899	8.05178	7.90236	8.06878	7.96331	7.93361	7.99595	8.08031	7.99517	7.98587	8.05964	7.95346	7.98048	7.98969	7.84381	7.91988	8.08543	8.08111
1	M1 UpD0 UpD6 Quiescence Vesicle SerumResponse	IRF1	80.8081	11.8809	12.4358	12.3293	12.2342	11.443	12.0144	12.9873	10.8695	11.6728	12.271	11.3413	11.119	11.8276	11.5538	11.1583	11.7827	11.5635	11.443	11.8903	11.7973	11.5689	12.0957	12.0445	12.1335
1	M1 UpD0 UpD6 Quiescence Vesicle SerumResponse	HS.374257	79.798	9.44434	9.90972	9.42852	8.41314	8.67676	8.23598	8.47191	8.52917	8.34924	8.37567	9.02218	8.43489	8.42223	9.00554	8.55047	8.40231	8.94847	8.48153	8.38109	8.79894	8.52302	8.39194	8.68715	8.56183
1	M1 UpD0 UpD6 Quiescence Vesicle SerumResponse	TLE1	79.798	10.2632	10.5623	10.208	8.70018	8.89637	8.79912	8.96629	8.80531	8.70478	8.72231	8.79314	8.80761	8.75538	9.48253	9.04772	8.97482	9.5873	9.12707	9.13857	9.81071	9.38915	9.48577	9.70104	9.42406
1	M1 UpD0 UpD6 Quiescence Vesicle SerumResponse	ARHGAP30	78.7879	12.5946	12.2409	12.304	11.2001	11.416	11.2161	12.1051	11.9712	11.0749	11.5845	11.8583	11.5761	11.7249	12.159	11.7484	11.6519	12.1748	11.7656	11.595	12.1013	11.6705	11.6127	12.0317	11.6368
1	M1 UpD0 UpD6 Quiescence Vesicle SerumResponse	CELF6	78.7879	8.91482	8.63573	8.86336	8.13301	8.19151	8.14129	8.59355	8.21119	8.12991	8.25158	8.2272	8.06962	8.34739	8.31319	8.31738	8.19013	8.37	8.22774	8.25696	8.23133	8.16888	8.15005	8.26754	8.18319
1	M1 UpD0 UpD6 Quiescence Vesicle SerumResponse	HLA-DMA	78.7879	14.06	14.3752	14.252	13.2233	13.1731	12.8779	14.1615	13.2759	12.7585	13.219	13.4873	13.2833	13.6388	13.8635	13.5224	13.5695	13.8558	13.817	13.3594	13.7258	13.0727	13.3594	13.5958	12.9387
1	M1 UpD0 UpD6 Quiescence Vesicle SerumResponse	PLEK	78.7879	12.3342	11.6949	12.3533	11.4355	10.293	10.862	10.3812	9.53268	9.98975	10.3957	10.0631	9.89338	10.0567	10.2076	9.83978	10.1586	10.2839	10.2301	10.104	10.8039	10.4071	10.1418	10.8381	10.5662
1	M1 UpD0 UpD6 Quiescence Vesicle SerumResponse	RNF167	78.7879	11.2065	11.4977	11.046	10.764	10.7143	10.406	11.5689	10.7587	10.19	10.7871	10.9421	10.5723	11.08	11.1863	10.8257	11.0026	11.0772	10.9094	10.6959	10.9503	10.8343	10.7364	10.9831	10.7315
1	M1 UpD0 UpD6 Quiescence Vesicle SerumResponse	APBB1IP	77.7778	11.6113	11.0567	11.2763	10.4395	10.3982	10.1372	10.6359	10.1153	10.0906	10.2126	9.97207	10.4668	10.1332	10.4905	10.5695	9.87612	10.6595	10.6346	9.83963	10.4837	10.6595	10.1924	10.5205	10.4741
1	M1 UpD0 UpD6 Quiescence Vesicle SerumResponse	ANXA2R	75.7576	11.6866	12.0413	11.9813	9.17681	8.99142	9.11393	9.2965	8.65202	8.62736	8.59486	8.71853	8.55684	8.58593	8.75599	8.85325	8.43427	8.92303	8.77879	8.68477	9.13784	8.68597	8.70434	8.87421	8.46901
1	M1 UpD0 UpD6 Quiescence Vesicle SerumResponse	LOC151457	75.7576	8.77189	9.35711	8.80923	8.38464	8.5765	8.30142	8.59355	8.24754	8.43081	8.28057	8.27694	8.33808	8.17959	8.33735	8.3977	8.40863	8.36304	8.34152	8.24256	8.58869	8.3779	8.25626	8.48325	8.35915
1	M1 UpD0 UpD6 Quiescence Vesicle SerumResponse	ZFAND3	75.7576	9.13053	8.91113	8.83933	8.53018	8.69406	8.51643	9.13186	8.49795	8.49502	8.47866	8.51003	8.41494	8.44724	8.41508	8.48883	8.29496	8.64859	8.42631	8.35222	8.70341	8.41963	8.64723	8.74879	8.50742
1	M1 UpD0 UpD6 Quiescence Vesicle SerumResponse	C1orf162	74.7475	13.116	13.3183	13.1502	8.8931	9.57291	9.62895	9.36117	9.05105	9.30948	8.66322	8.91122	8.95898	8.33624	8.97968	8.96629	8.39316	9.36288	8.9437	8.45233	9.35145	8.72086	8.38936	9.24541	8.60953
1	M1 UpD0 UpD6 Quiescence Vesicle SerumResponse	FIG4	74.7475	10.8116	11.2821	10.7272	9.44838	9.987	9.67278	11.5863	9.52037	9.4939	9.31227	9.54047	9.29159	9.29946	9.62474	9.50125	9.07151	9.85064	9.45163	9.1663	9.69647	9.37013	9.2733	9.69179	9.37908
1	M1 UpD0 UpD6 Quiescence Vesicle SerumResponse	LTB	74.7475	13.8915	13.9433	13.7534	10.9924	10.9629	10.5623	10.8692	10.3441	10.324	10.4398	10.292	10.5353	9.65059	10.3342	10.8663	9.68115	11.1764	11.2679	9.58361	12.1859	11.2884	9.84384	11.5134	10.4942
1	M1 UpD0 UpD6 Quiescence Vesicle SerumResponse	PAF1	74.7475	11.7165	11.6461	11.5884	10.8055	10.9108	10.9488	12.0327	11.5186	11.0237	11.2381	11.5108	11.4444	11.0545	11.4638	11.2427	10.88	11.2743	11.0237	11.2361	11.4503	11.0932	10.962	11.5395	11.1516
1	M1 UpD0 UpD6 Quiescence Vesicle SerumResponse	RHBDD2	74.7475	10.5469	11.0214	10.4533	9.2694	9.37823	9.1866	10.5146	10.3348	9.7564	9.87274	10.4958	10.1421	9.44347	9.93253	9.81346	9.31418	9.84022	9.4221	9.47517	9.93369	9.60055	9.1841	9.806	9.59199
1	M1 UpD0 UpD6 Quiescence Vesicle SerumResponse	SUGP1	74.7475	10.852	10.7233	10.5359	10.1219	9.90893	9.8188	10.9549	10.7503	10.1748	10.313	10.6472	10.4501	10.2137	10.5518	10.1395	10.0611	10.4677	10.2542	10.1746	10.5031	10.4884	10.0659	10.406	10.3689
1	M1 UpD0 UpD6 Quiescence Vesicle SerumResponse	TMEM222	74.7475	9.51051	9.67265	9.38478	8.70764	8.93943	8.68887	11.7068	9.43118	8.94534	9.06287	9.52536	9.1945	8.99514	9.48875	9.01056	8.95381	9.18938	9.09915	8.97181	9.24519	8.96151	8.93576	9.19234	9.11111
1	M1 UpD0 UpD6 Quiescence Vesicle SerumResponse	ARFGAP1	73.7374	9.56808	9.27546	9.22704	8.74279	8.98428	8.67946	10.0643	9.71432	9.0459	8.95294	9.69407	9.18947	8.98017	9.54061	9.26477	9.03555	9.79014	9.17692	9.2922	10.003	9.45913	9.45116	10.2707	9.64783
1	M1 UpD0 UpD6 Quiescence Vesicle SerumResponse	LOC650029	73.7374	9.82708	10.1481	9.86591	9.53581	9.7196	9.77993	11.8202	10.2672	9.79014	10.0258	10.3119	10.0873	9.79901	9.97237	9.87361	9.758	9.94696	9.75033	9.88762	10.0289	9.80283	9.79985	10.0089	9.99036
1	M1 UpD0 UpD6 Quiescence Vesicle SerumResponse	TMEM57	73.7374	8.8316	8.76468	8.65543	8.69657	8.80356	8.60285	9.84817	9.02302	8.73307	8.57343	9.03449	8.67696	8.44792	8.81615	8.50033	8.43511	8.91758	8.42701	8.85142	9.19623	8.71709	8.93788	9.25246	8.91917
1	M1 UpD0 UpD6 Quiescence Vesicle SerumResponse	C7orf26	72.7273	10.9076	11.5492	11.1475	9.6244	10.1026	9.60656	10.4214	10.5818	10.4715	10.0639	10.5566	10.2443	9.80074	10.367	10.1655	9.8751	10.5196	10.2773	9.72704	10.459	10.2784	9.6397	10.4639	10.2809
1	M1 UpD0 UpD6 Quiescence Vesicle SerumResponse	ATXN2	71.7172	12.1889	11.9	11.7892	11.0894	11.5018	11.1888	11.3407	11.3152	11.0154	10.9512	11.2562	10.9979	11.1869	11.2478	11.054	11.1755	11.1432	10.9955	11.1519	11.2241	11.022	11.2666	11.4503	11.1614
1	M1 UpD0 UpD6 Quiescence Vesicle SerumResponse	ARHGEF19	69.697	9.19058	9.44524	9.35859	8.33287	8.9548	8.47391	9.44762	8.87197	8.34081	8.57023	8.89394	8.4605	8.59105	8.95623	8.44662	8.42003	8.89675	8.44083	8.54357	8.95428	8.28594	8.33646	8.98468	8.52101
1	M1 UpD0 UpD6 Quiescence Vesicle SerumResponse	LRRC14	69.697	10.5549	10.8257	10.6877	9.48909	9.69958	9.28832	10.4717	9.94044	9.22996	9.49602	9.94929	9.37655	9.5296	9.73619	9.56755	9.49726	9.79561	9.56337	9.32384	9.73744	9.19478	9.3787	10.1213	9.4193
1	M1 UpD0 UpD6 Quiescence Vesicle SerumResponse	CCDC24	67.6768	9.99601	9.29999	10.2103	9.10539	8.83557	8.83274	8.85289	8.66474	8.68283	8.72257	8.7776	8.60576	8.66168	8.7324	8.75926	8.50417	9.2783	9.07752	8.37201	9.47919	8.76909	8.33118	9.05614	8.3326
1	M1 UpD0 UpD6 Quiescence Vesicle SerumResponse	DYRK4	62.6263	10.535	10.5929	10.4685	10.4352	10.7874	10.4501	11.7492	10.4417	10.2546	10.1518	10.4214	10.1959	10.0144	10.2457	10.0938	10.1163	10.5864	10.1204	10.5252	10.8306	10.3597	10.8654	10.98	10.5892
1	M1 UpD0 UpD6 Quiescence Vesicle SerumResponse	GPM6A	61.6162	8.80829	8.60072	8.81721	8.07736	8.10726	8.01407	8.35264	8.05013	8.02649	8.09208	8.21947	8.048	8.03479	8.20764	8.13362	8.04008	8.11112	8.06072	8.02431	8.08113	8.05802	8.1205	8.11735	7.99513
1	M1 UpD0 UpD6 Quiescence Vesicle SerumResponse	TMEM134	61.6162	10.1554	10.2977	10.1285	9.66204	9.4305	9.38325	10.6447	9.4154	9.38926	9.58889	9.588	9.52287	9.45225	9.60324	9.5343	9.31184	9.50296	9.4413	9.26498	9.61555	9.29701	9.57097	9.75158	9.46831
1	M1 UpD0 UpD6 Quiescence Vesicle SerumResponse	DDR1	59.596	9.29502	9.05987	9.02981	8.57016	8.75934	8.55217	9.37828	8.61062	8.37965	8.59663	8.54727	8.3859	8.50673	8.52726	8.43633	8.39884	8.54278	8.50933	8.3029	8.66505	8.35485	8.60237	8.84116	8.32827
1	M1 UpD0 UpD6 Quiescence Vesicle SerumResponse	GCSAM	57.5758	8.53051	9.48515	8.93372	8.55349	8.76615	8.69138	9.34814	8.59536	8.33976	8.46096	8.6212	8.54614	8.36775	8.53508	8.48288	8.58562	8.7736	8.46038	8.74593	9.10099	8.71638	9.23343	9.7728	9.11228
1	M1 UpD0 UpD6 Quiescence Vesicle SerumResponse	TBC1D15	57.5758	10.2111	10.9869	10.7827	10.4608	10.9772	10.9605	10.7831	10.557	10.69	10.3126	10.5754	10.5234	10.3724	10.7257	10.4829	10.5329	10.7149	10.313	10.4702	10.6097	10.6914	11.0747	11.2575	10.8165
1	M1 UpD0 UpD6 Quiescence Vesicle SerumResponse	FBXL15	54.5455	9.38225	9.44048	9.53933	9.13511	9.32857	8.95763	9.9572	9.04212	8.68283	8.8548	9.08952	8.98007	8.72054	9.02871	8.86379	8.64405	8.99152	8.74685	8.78753	9.08718	8.92478	8.95215	9.38647	9.11142
1	M1 UpD0 UpD6 Quiescence Vesicle SerumResponse	AP1S2	53.5354	12.1368	12.0338	11.8211	11.4345	11.6163	11.068	10.8972	11.2329	10.9152	11.397	11.2136	10.8187	11.329	11.5537	10.8246	11.4788	11.4982	11.0637	11.3132	11.314	10.9014	11.4045	11.2673	10.9463
1	M1 UpD0 UpD6 Quiescence Vesicle SerumResponse	ARIH2	53.5354	11.4345	11.2691	11.292	10.3646	10.6225	10.4202	10.2005	10.2162	10.242	10.2281	10.5005	10.0235	10.4063	10.6823	10.2533	10.5737	10.4088	10.2157	10.5438	10.6369	10.0961	10.5375	10.6589	10.1275
1	M1 UpD0 UpD6 Quiescence Vesicle SerumResponse	CEP95	53.5354	11.1055	10.8218	11.0252	10.6187	10.6539	10.4647	8.40841	10.4486	10.1038	10.453	10.4989	10.2516	10.6959	10.4105	10.3638	10.7201	10.6815	10.4016	10.6327	10.4925	10.2312	10.7606	10.5769	10.42
1	M1 UpD0 UpD6 Quiescence Vesicle SerumResponse	SEC62	53.5354	10.5792	10.8563	10.1937	8.95354	9.22736	8.87859	8.0635	8.7758	8.42442	8.76864	8.86424	8.60012	9.30869	9.16705	8.91577	9.37655	9.04058	8.79984	9.34245	9.21458	8.87472	9.66669	9.50151	8.85735
1	M1 UpD0 UpD6 Quiescence Vesicle SerumResponse	ZNF22	53.5354	11.5952	11.7835	11.5301	11.2906	11.5935	11.3749	9.98436	11.2396	10.9978	11.1984	11.2432	11.1941	11.389	11.3979	11.1184	11.6401	11.4821	11.1415	11.4638	11.4495	11.1525	11.6333	11.5268	11.1339
1	M1 UpD0 UpD6 Quiescence Vesicle SerumResponse	CDK5RAP3	52.5253	12.0498	11.6997	11.7681	10.8984	11.5233	10.6745	11.6452	11.2685	10.5574	10.5385	11.2149	10.7584	10.7397	11.14	10.8563	10.5189	11.092	10.616	10.5739	11.2497	10.4673	11.0738	11.4891	10.7537
1	M1 UpD0 UpD6 Quiescence Vesicle SerumResponse	SIGIRR	52.5253	9.83713	9.72278	9.53156	8.67747	8.81918	8.51314	10.314	8.90138	8.6549	8.64569	8.84428	8.82557	8.70666	9.31277	8.7044	8.71156	9.17195	8.7121	8.64194	9.04735	8.57599	8.65263	9.00283	8.82112
1	M1 UpD0 UpD6 Quiescence Vesicle SerumResponse	XPC	52.5253	11.6003	10.9372	11.2777	10.3766	10.8755	10.478	10.5333	10.4564	10.1026	10.1727	10.2037	10.2143	10.1878	10.267	10.2516	10.1646	10.1553	10.0686	10.0631	10.3838	10.1229	10.3325	10.4861	10.0603
1	M1 UpD0 UpD6 Quiescence Vesicle SerumResponse	FAM160B2	49.4949	9.18709	9.05547	9.11814	8.48108	8.50875	8.41426	8.85288	8.51067	8.43099	8.32933	8.63952	8.50392	8.44503	8.51345	8.4894	8.36987	8.65064	8.44346	8.24665	8.54019	8.3758	8.46522	8.65884	8.42512
1	M1 UpD0 UpD6 Quiescence Vesicle SerumResponse	CD37	48.4848	12.8864	12.8459	12.6289	10.1984	10.171	9.98267	10.6705	10.195	9.96355	9.97251	10.0759	9.99761	9.80817	10.1854	9.99299	9.50349	10.5072	10.0895	9.42279	10.8214	10.0714	9.72208	10.4365	9.85096
1	M1 UpD0 UpD6 Quiescence Vesicle SerumResponse	ORAI1	48.4848	8.96824	9.94964	9.13396	8.55872	8.60978	8.31687	8.64751	8.75528	8.29671	8.39268	8.703	8.43957	8.36036	8.79456	8.42284	8.39604	8.9437	8.41171	8.23164	8.66505	8.62514	8.10138	8.80049	8.33451
1	M1 UpD0 UpD6 Quiescence Vesicle SerumResponse	PIK3C2B	48.4848	10.0567	9.82261	9.31774	9.52853	9.65058	9.49574	10.1521	9.41086	9.25679	9.13042	9.20804	9.12024	9.05073	9.48091	9.20083	8.91566	9.72415	9.38066	8.99606	9.74027	9.21804	8.87685	9.57557	9.16392
1	M1 UpD0 UpD6 Quiescence Vesicle SerumResponse	SH2D3C	46.4646	11.2893	11.1668	11.1432	9.60117	9.91427	9.65058	10.0245	10.0366	9.24599	8.82705	9.75659	9.68373	8.77887	9.95179	9.29628	8.70132	10.1184	9.62532	8.71959	10.0549	9.29874	9.11385	9.90693	9.31902
1	M1 UpD0 UpD6 Quiescence Vesicle SerumResponse	CPNE1	43.4343	10.4466	10.4562	10.2258	10.3385	10.1106	9.93175	11.0432	10.2554	9.98552	9.96715	10.1522	9.84023	9.68715	10.2882	9.84469	9.8047	10.2213	9.87689	9.88307	10.4504	9.91149	9.74135	10.4602	9.95466
1	M1 UpD0 UpD6 Quiescence Vesicle SerumResponse	DHPS	43.4343	10.4886	10.5909	10.329	10.2666	10.5866	10.4194	10.7784	10.4493	10.207	10.0336	10.3492	9.91717	9.90106	10.4857	9.92116	9.95642	10.557	9.9974	10.1057	10.4771	10.2037	10.118	10.582	10.2154
1	M1 UpD0 UpD6 Quiescence Vesicle SerumResponse	LOC285074	43.4343	10.8532	11.5545	11.2669	10.669	10.8735	10.8412	10.4608	10.4576	10.3074	10.3029	10.5964	9.9868	10.4991	10.653	10.2817	10.6398	10.8387	10.3873	10.9333	11.1045	10.5081	11.4343	11.4193	10.8548
1	M1 UpD0 UpD6 Quiescence Vesicle SerumResponse	PPM1F	41.4141	11.4077	11.3278	11.4307	9.17866	10.0908	9.61067	10.1879	9.94408	9.36543	9.39786	10.2926	9.34594	9.44114	9.96426	9.47528	9.33477	9.7753	9.07251	9.17729	9.67278	9.09117	9.49948	9.97844	9.1376
1	M1 UpD0 UpD6 Quiescence Vesicle SerumResponse	CAMK2G	39.3939	10.1996	10.5538	10.12	9.04671	9.06501	9.06568	9.45335	8.8316	8.73765	8.79658	9.09658	8.8563	8.71749	8.94823	8.62933	8.78899	8.69264	8.70284	8.87206	8.95344	8.67823	8.86226	9.01001	9.00221
1	M1 UpD0 UpD6 Quiescence Vesicle SerumResponse	ELP2	39.3939	10.431	10.1279	10.0077	10.1438	10.4723	10.121	10.302	9.91911	9.83781	9.92014	9.92216	9.80208	9.75033	9.54351	9.60303	9.73146	9.76015	9.72627	9.84799	9.80337	9.64154	9.63368	9.94166	9.95513
1	M1 UpD0 UpD6 Quiescence Vesicle SerumResponse	LOC399491	39.3939	8.65395	8.61396	8.79129	8.7912	8.67543	8.97042	9.5041	8.28653	8.55946	8.34396	8.56453	8.326	8.21107	8.33295	8.2062	8.31738	8.25755	8.30491	8.31386	8.39498	8.25949	8.3817	8.59091	8.59924
1	M1 UpD0 UpD6 Quiescence Vesicle SerumResponse	LOC643733	39.3939	8.65841	9.33043	8.96242	8.48758	8.74495	8.74092	8.98521	8.22009	8.51606	8.29884	8.38981	8.24052	8.28085	8.27485	8.26497	8.34769	8.38071	8.22597	8.47171	8.68315	8.16888	8.80373	8.63957	8.33512
1	M1 UpD0 UpD6 Quiescence Vesicle SerumResponse	LY9	39.3939	10.1217	10.3667	9.9964	8.86303	8.53409	8.90573	9.4551	8.29038	8.88057	8.37854	8.25805	8.27285	8.05223	8.0401	8.10461	8.03561	8.09955	8.09591	8.08451	8.66396	8.34005	8.61371	9.16714	8.94019
1	M1 UpD0 UpD6 Quiescence Vesicle SerumResponse	NPEPL1	39.3939	10.2697	9.77377	10.5412	9.45859	9.36582	9.40563	9.42645	8.9998	9.19809	8.99921	9.21726	8.99274	9.03441	8.74635	9.1524	8.74593	8.79904	9.04381	8.80049	9.06546	8.76817	9.26668	9.54864	9.24508
1	M1 UpD0 UpD6 Quiescence Vesicle SerumResponse	RBBP6	39.3939	10.2814	10.7114	10.3812	9.32077	9.32099	9.20257	9.48078	9.04637	9.26638	8.90232	8.98468	8.88487	8.95687	8.76554	8.81665	9.0633	8.95428	8.95709	9.01895	9.15801	9.14976	9.44885	9.30551	9.25112
1	M1 UpD0 UpD6 Quiescence Vesicle SerumResponse	RPL15P22	39.3939	9.34425	9.70745	9.49135	9.0487	9.03209	9.12504	9.16817	8.98056	9.05244	9.07508	9.07912	9.10231	8.90054	9.00972	8.88219	8.99645	8.9921	8.95909	9.03433	9.10728	8.97042	9.11609	9.10136	9.1458
1	M1 UpD0 UpD6 Quiescence Vesicle SerumResponse	SLC18B1	39.3939	10.8019	10.8348	10.7518	9.01112	9.29	9.12849	9.30538	8.48098	8.74393	8.55182	8.64709	8.60012	8.4106	8.37428	8.54614	8.44819	8.5816	8.44359	8.60299	8.75571	8.49884	9.06738	8.8406	8.70682
1	M1 UpD0 UpD6 Quiescence Vesicle SerumResponse	TESK2	39.3939	9.28224	9.13104	9.41436	8.60511	8.56774	8.53232	8.59623	8.20019	8.44528	8.36238	8.17702	8.33338	8.16039	8.24269	8.1131	8.16519	8.35461	8.23662	8.21253	8.5086	8.32834	8.3924	8.83791	8.5093
1	M1 UpD0 UpD6 Quiescence Vesicle SerumResponse	TTC32	39.3939	9.66845	9.76206	10.5298	10.0418	9.75887	10.1389	10.6518	9.42655	9.68501	9.64817	9.42786	9.74083	9.66929	9.10773	9.42576	9.55548	9.18362	9.29502	9.27408	9.94271	9.28877	9.89207	10.5371	9.70492
1	M1 UpD0 UpD6 Quiescence Vesicle SerumResponse	C15orf61	31.3131	9.03449	9.31872	8.89416	9.34733	9.32879	9.0708	9.57113	8.77768	8.68248	8.75054	8.87513	8.78381	8.72558	8.61296	8.62655	8.70788	9.10409	8.52515	8.95611	9.30067	8.76412	8.91845	9.34525	8.73835
1	M1 UpD0 UpD6 Quiescence Vesicle SerumResponse	GYPC	31.3131	10.4968	11.6218	10.6482	10.9342	11.1293	10.9857	11.6862	10.5523	10.8225	10.2698	10.5158	10.1325	9.97419	10.5679	9.89106	10.1913	10.7999	10.0235	10.7411	11.0885	10.3292	11.1187	11.274	10.5042
1	M1 UpD0 UpD6 Quiescence Vesicle SerumResponse	ADAM8	29.2929	9.81087	9.78296	9.90878	8.73335	8.83274	8.46531	11	8.9995	8.55804	8.79588	8.70755	8.73384	8.62349	8.76485	8.64816	8.55273	8.89195	8.731	8.28617	9.09224	8.73118	8.36101	8.92678	8.39487
1	M1 UpD0 UpD6 Quiescence Vesicle SerumResponse	BAG6	29.2929	10.406	10.5036	10.1308	9.53886	10.0967	9.65871	10.9111	10.3196	9.96426	9.46306	10.0695	9.85811	9.29923	10.1652	9.70686	9.18957	10.1502	9.74027	9.23851	10.2165	9.7196	9.3614	10.13	9.7098
1	M1 UpD0 UpD6 Quiescence Vesicle SerumResponse	CMTR1	29.2929	10.3138	10.4276	10.3001	9.65717	9.93925	9.55061	10.9304	9.84546	9.57461	9.75207	9.92267	9.72559	9.54864	9.83031	9.59335	9.46791	9.79328	9.6004	9.44298	9.88301	9.48956	9.50501	9.96201	9.76323
1	M1 UpD0 UpD6 Quiescence Vesicle SerumResponse	COQ10A	29.2929	10.0751	10.332	10.174	9.26392	9.24157	9.21872	9.94586	9.5421	9.19424	9.39956	9.64683	9.43356	9.04829	9.42084	9.21318	8.99239	9.33652	9.03905	8.96619	9.33704	9.07291	9.14372	9.73814	9.45622
1	M1 UpD0 UpD6 Quiescence Vesicle SerumResponse	DDX24	29.2929	11.8742	11.5823	11.4424	11.1542	11.4943	10.9784	13.3304	11.5884	11.4959	11.2587	11.2401	11.244	11.1143	11.3312	11.1888	11.0898	11.3786	11.1491	11.185	11.6043	11.2669	10.8532	11.6179	11.0786
1	M1 UpD0 UpD6 Quiescence Vesicle SerumResponse	FAM159A	29.2929	9.61579	9.5147	9.4256	8.69066	8.70739	8.73055	9.54111	8.98228	8.75608	8.68418	8.83028	8.88196	8.55865	8.8225	8.69097	8.54814	8.73286	8.66423	8.59772	8.87693	8.72831	8.71785	8.74153	8.70885
1	M1 UpD0 UpD6 Quiescence Vesicle SerumResponse	GGA3	29.2929	9.83297	9.78518	9.68581	9.07342	9.31547	9.08486	10.353	9.36018	9.0823	9.0266	9.28744	9.31774	8.93235	9.43498	9.24912	9.0685	9.29974	9.29845	8.89239	9.39239	9.2207	8.89351	9.52562	9.08402
1	M1 UpD0 UpD6 Quiescence Vesicle SerumResponse	GSTK1	29.2929	12.2904	12.2102	12.3553	11.8947	12.0593	11.8177	12.599	12.1687	11.8168	11.5574	12.0945	11.9243	11.5333	11.8441	11.6346	11.2893	12.0422	11.6625	11.2578	12.0857	11.5018	11.6685	12.1259	11.6592
1	M1 UpD0 UpD6 Quiescence Vesicle SerumResponse	LRRC8D	29.2929	9.44509	9.7221	9.21837	8.84621	9.0041	8.85691	9.49514	8.96694	8.67832	9.06166	8.83904	8.8763	8.82802	8.85715	8.68984	8.83808	8.83427	8.85683	8.93225	8.9957	8.88271	8.70549	8.99295	8.7718
1	M1 UpD0 UpD6 Quiescence Vesicle SerumResponse	LTBP4	29.2929	9.03594	8.98183	8.88022	8.83942	9.12493	8.63905	9.41367	9.1739	8.93072	8.60936	8.91777	8.70576	8.44924	8.93133	8.54174	8.49277	8.91497	8.60699	8.49706	8.93282	8.64732	8.51676	9.00692	8.70159
1	M1 UpD0 UpD6 Quiescence Vesicle SerumResponse	PLEKHB1	29.2929	9.07942	8.86257	8.65765	8.32652	8.40167	8.35679	9.2066	8.7476	8.33267	8.28456	8.6548	8.52326	8.28611	8.48434	8.2923	8.21901	8.56926	8.3326	8.18418	8.47272	8.29813	8.32556	8.36599	8.29918
1	M1 UpD0 UpD6 Quiescence Vesicle SerumResponse	POLM	29.2929	9.50379	9.64744	9.75192	8.67696	9.01832	8.88791	9.04705	8.9922	8.75757	8.63683	8.89571	8.9364	8.6181	8.91855	8.8363	8.64521	8.86541	8.8708	8.53309	8.92707	8.69613	8.81109	8.88011	8.70248
1	M1 UpD0 UpD6 Quiescence Vesicle SerumResponse	PUM1	29.2929	12.0921	12.1411	12.0873	11.376	11.5059	11.3121	11.553	11.5423	11.3971	11.2837	11.4574	11.3598	11.231	11.4093	11.2292	11.2867	11.4157	11.4024	11.0982	11.2467	11.384	11.387	11.4514	11.3835
1	M1 UpD0 UpD6 Quiescence Vesicle SerumResponse	RFNG	29.2929	10.2474	10.4615	10.5501	9.48409	9.57026	9.54005	10.2136	9.83636	9.45024	9.19301	9.83297	9.5685	9.21446	9.76172	9.46473	9.11877	9.51087	9.31983	9.11176	9.73357	9.30257	9.43485	10.0215	9.43187
1	M1 UpD0 UpD6 Quiescence Vesicle SerumResponse	UBR4	29.2929	10.5041	9.89473	10.3111	10.1127	10.4594	9.89352	10.5581	10.6225	10.0336	9.88269	10.3558	10.2454	9.66425	10.1559	10.0238	9.43799	10.3687	9.7514	9.42527	10.3666	9.89338	9.4394	10.4953	9.80724
1	M1 UpD0 UpD6 Quiescence Vesicle SerumResponse	CASC3	28.2828	10.1391	10.0648	9.58461	9.3263	9.78834	9.1425	10.5309	10.1978	9.38661	9.56035	10.0732	9.56265	9.62323	10.0591	9.56378	9.62775	10.1834	9.42151	9.58013	10.1291	9.55378	9.34633	10.2154	9.45756
1	M1 UpD0 UpD6 Quiescence Vesicle SerumResponse	HS.31532	28.2828	9.18607	9.4098	9.22126	8.91973	8.81342	8.68555	9.31675	8.94259	8.8351	8.44813	8.78249	8.58729	8.54168	8.60953	8.72639	8.50345	8.77835	8.71191	8.5506	8.85188	8.62369	8.56861	8.83081	8.65529
1	M1 UpD0 UpD6 Quiescence Vesicle SerumResponse	IDNK	28.2828	9.68731	9.86465	9.88612	9.08889	9.09892	9.21192	9.3813	9.05583	8.93164	9.03694	9.19037	9.05666	9.05514	9.05559	9.12458	8.83913	8.92372	9.09288	8.96102	9.00633	9.1094	9.6722	9.44034	9.30149
1	M1 UpD0 UpD6 Quiescence Vesicle SerumResponse	COG2	27.2727	10.6339	10.6722	10.4088	10.0998	10.4997	9.95687	10.5603	10.6672	10.1105	10.2775	10.3573	10.2989	10.2539	10.4382	9.92796	10.3115	10.3355	9.88145	10.267	10.3483	9.94166	10.1561	10.5983	10.1066
1	M1 UpD0 UpD6 Quiescence Vesicle SerumResponse	NME4	27.2727	10.9836	11.1845	10.822	9.89449	10.6699	10.1065	10.3788	10.8145	10.1195	9.57971	10.562	10.0314	9.56364	10.1399	9.8526	9.76234	10.125	9.71855	9.97329	10.2501	9.63655	9.85292	10.1725	9.41205
1	M1 UpD0 UpD6 Quiescence Vesicle SerumResponse	RPL15P17	27.2727	9.02062	9.44814	9.1425	8.61455	8.79784	8.69994	9.99775	8.77251	8.65822	8.62235	8.78397	8.63941	8.61365	8.73783	8.55533	8.67607	8.71112	8.52196	8.61749	8.73404	8.58612	8.64233	8.72416	8.49403
1	M1 UpD0 UpD6 Quiescence Vesicle SerumResponse	SDHAF1	27.2727	10.1655	10.8134	10.4476	9.93042	10.1733	9.8206	10.2829	9.97005	9.88775	9.76263	10.2297	9.82245	9.48743	9.80045	9.64843	9.78476	9.97631	9.75616	9.84175	10.0713	9.84974	9.87166	9.89418	9.78742
1	M1 UpD0 UpD6 Quiescence Vesicle SerumResponse	ZNF766	27.2727	9.69994	9.43041	9.51377	9.04705	9.07942	9.15358	9.58658	9.01448	9.04322	9.17402	8.97878	9.27432	8.9146	9.16041	9.05386	9.00294	8.94736	9.15789	8.97439	8.99076	9.19983	9.18426	9.34413	9.25112
1	M1 UpD0 UpD6 Quiescence Vesicle SerumResponse	LINS1	26.2626	9.6711	9.59515	9.68762	9.44871	9.40453	9.3325	9.47931	9.18692	9.41402	9.24279	9.00169	9.2767	9.0873	8.94508	9.13669	9.04284	9.11752	9.14164	9.0042	9.26452	9.22716	9.20814	9.15599	9.21872
1	M1 UpD0 UpD6 Quiescence Vesicle SerumResponse	SLU7	26.2626	9.91236	10.5099	10.2213	9.7997	9.72542	9.89917	9.71073	9.68453	9.93523	9.85292	9.55436	9.71187	9.52368	9.57189	9.6362	9.56235	9.61052	9.63241	9.43173	9.70421	9.89932	9.75736	9.84923	9.87922
1	M1 UpD0 UpD6 Quiescence Vesicle SerumResponse	ARAF	25.2525	11.1379	11.3921	11.2323	10.2839	10.2787	10.3367	10.8915	10.7759	10.4152	10.5739	10.8064	10.6749	10.4377	10.8563	10.7752	10.4287	10.8226	10.845	10.4782	10.8911	10.6491	10.551	10.8855	10.5485
1	M1 UpD0 UpD6 Quiescence Vesicle SerumResponse	AKAP13	24.2424	10.101	9.59023	9.82555	8.86216	9.12176	9.12094	10.5168	9.24541	9.16489	8.96301	9.07662	8.98064	8.80094	9.22414	9.07526	8.70657	9.16442	9.19572	8.62828	8.92433	8.96028	9.01799	9.15714	9.12687
1	M1 UpD0 UpD6 Quiescence Vesicle SerumResponse	STK10	24.2424	10.038	10.183	9.83978	9.23271	9.5421	9.20384	10.6681	9.97844	9.58321	9.33568	9.69559	9.56927	9.22414	9.77993	9.36073	9.10219	9.90001	9.49854	8.95527	9.61143	9.37035	9.06867	9.74872	9.52227
1	M1 UpD0 UpD6 Quiescence Vesicle SerumResponse	IL2RG	23.2323	8.69406	9.01388	8.51168	8.18344	8.23115	8.1749	11.0033	8.43151	8.32842	8.24425	8.31087	8.28277	8.15464	8.35088	8.28036	8.14313	8.33306	8.22013	8.07794	8.27431	8.25704	8.11268	8.39545	8.28321
1	M1 UpD0 UpD6 Quiescence Vesicle SerumResponse	MAPK7	23.2323	8.93008	8.96151	8.94518	8.2145	8.37619	8.3151	9.47679	8.85807	8.45233	8.43359	8.88368	8.51009	8.41567	8.77106	8.54257	8.39917	8.58926	8.53762	8.37085	8.41225	8.5953	8.2772	8.71575	8.52127
1	M1 UpD0 UpD6 Quiescence Vesicle SerumResponse	SERPINA10	23.2323	9.04245	8.92303	8.64225	8.25461	8.41641	8.2459	9.20212	8.53025	8.30951	8.46438	8.42366	8.61625	8.68949	8.63586	8.59835	8.51634	8.47919	8.43555	8.45098	8.46029	8.61474	8.49888	8.73884	8.59782
1	M1 UpD0 UpD6 Quiescence Vesicle SerumResponse	TMEM50A	23.2323	9.07786	9.19165	8.88263	8.33722	8.27011	8.41783	9.5889	8.84887	8.6278	8.57709	8.80968	8.65522	8.6708	8.86971	8.7564	8.56973	8.81457	8.81836	8.76257	8.72031	8.82048	8.48228	8.83619	8.84381
1	M1 UpD0 UpD6 Quiescence Vesicle SerumResponse	ZNF468	23.2323	9.04135	8.90703	8.72031	8.27849	8.46939	8.40409	8.83353	8.57752	8.56043	8.21761	8.49271	8.63639	8.39739	8.61783	8.57924	8.3401	8.60746	8.74168	8.25899	8.60174	8.59777	8.40711	8.59513	8.6355
1	M1 UpD0 UpD6 Quiescence Vesicle SerumResponse	AKNA	22.2222	12.2267	12.0144	11.8939	10.2868	10.8049	10.3977	12.296	11.721	11.0493	10.6726	11.4965	11.5167	10.7371	11.6866	11.8503	10.6299	11.7956	11.628	10.5862	11.6503	11.51	10.9008	11.6136	11.3426
1	M1 UpD0 UpD6 Quiescence Vesicle SerumResponse	ALPL	22.2222	9.71618	8.39793	9.13784	8.24748	8.08527	8.10386	8.13303	8.16246	8.07055	8.32968	7.98631	8.14409	8.00128	8.03904	8.07974	8.03326	7.99164	8.13683	8.01256	8.20312	8.45191	8.22814	8.05993	8.40242
1	M1 UpD0 UpD6 Quiescence Vesicle SerumResponse	ANKRD13D	22.2222	8.98709	8.72632	8.97948	8.33946	8.52127	8.23248	9.03634	8.66022	8.63125	8.50215	8.93041	8.58663	8.72535	8.82186	8.82196	8.68263	8.77237	9.05062	8.71917	8.73997	8.56828	8.67355	8.72454	8.48064
1	M1 UpD0 UpD6 Quiescence Vesicle SerumResponse	AP1G2	22.2222	10.7043	10.3729	10.5383	9.46148	9.4996	9.2827	10.2756	9.83781	9.55294	9.21269	9.90373	9.69255	9.45756	10.1241	10.227	9.38251	10.2095	10.2603	9.07517	10.0782	9.78705	9.16463	9.94615	9.68908
1	M1 UpD0 UpD6 Quiescence Vesicle SerumResponse	GDI1	22.2222	9.93042	10.0256	9.87648	9.36246	9.22107	9.28326	11.3565	9.8467	9.50033	9.31788	9.58389	9.6111	9.46473	9.71584	9.90726	9.39968	9.61565	9.62242	9.26327	9.48113	9.55254	9.08451	9.38418	9.38349
1	M1 UpD0 UpD6 Quiescence Vesicle SerumResponse	GMIP	22.2222	10.8509	11.0388	10.874	8.86896	9.42786	9.10782	10.9789	10.1116	9.41875	9.12239	10.2896	10.0896	9.16565	10.0792	10.2294	9.15877	10.1383	9.79084	9.12625	9.9911	9.44181	8.90175	9.6754	8.98391
1	M1 UpD0 UpD6 Quiescence Vesicle SerumResponse	LHFPL2	22.2222	9.81758	9.12569	9.41578	8.4365	8.311	8.38064	8.83418	8.62828	8.40658	8.38238	8.62758	8.65388	8.43857	8.87234	8.7419	8.54752	8.69791	8.71838	8.46627	8.5018	8.45916	8.57332	8.51383	8.49049
1	M1 UpD0 UpD6 Quiescence Vesicle SerumResponse	LOC100133129	22.2222	9.50326	8.98552	9.21318	8.36842	8.48362	8.50629	9.74282	8.94508	8.72987	8.39939	8.65574	8.68385	8.46698	8.84389	8.87452	8.37254	8.86764	8.71305	8.55872	8.79535	8.56167	8.36664	8.85451	8.48379
1	M1 UpD0 UpD6 Quiescence Vesicle SerumResponse	MBD6	22.2222	10.5481	10.3541	10.5279	9.33591	9.6512	9.30297	10.4576	10.2306	9.89164	9.37963	10.1777	9.9974	9.49804	9.98281	9.77881	9.49726	9.89255	10.1418	9.70874	9.94464	9.76172	9.66546	10.058	9.67446
1	M1 UpD0 UpD6 Quiescence Vesicle SerumResponse	MOB3A	22.2222	11.2267	10.9766	10.7465	9.8558	9.61143	9.90483	13.0727	11.0968	10.6543	10.5333	10.8891	10.6926	10.5758	10.8996	10.9099	10.5553	10.9436	10.852	10.571	10.9278	10.6059	10.8049	10.6703	10.5003
1	M1 UpD0 UpD6 Quiescence Vesicle SerumResponse	MYO9B	22.2222	11.0579	10.8509	10.6205	9.19234	9.41705	9.3083	10.6628	10.3409	9.83397	9.46965	10.1568	9.98281	9.32343	10.3708	10.1671	9.39553	10.2291	10.0162	9.46117	10.2205	9.70104	9.22926	9.96699	9.53652
1	M1 UpD0 UpD6 Quiescence Vesicle SerumResponse	NFATC3	22.2222	9.36706	9.31104	9.17754	8.44217	8.64423	8.63886	9.2707	8.99714	8.86433	8.67493	8.69798	8.92161	8.78302	8.96379	8.9247	8.68576	9.03917	8.70657	8.7044	9.094	8.7346	8.67086	9.07016	8.69834
1	M1 UpD0 UpD6 Quiescence Vesicle SerumResponse	NLRC3	22.2222	9.49432	9.12903	9.26789	8.30238	8.52435	8.57877	9.43158	8.92433	8.62286	8.49519	9.13701	8.87822	8.60093	9.17023	8.90855	8.63211	9.18879	8.93398	8.67348	8.83531	8.93372	8.79068	8.89476	8.79044
1	M1 UpD0 UpD6 Quiescence Vesicle SerumResponse	ORAI2	22.2222	8.89746	8.855	8.70939	8.11327	8.33735	8.21147	9.79363	8.91901	8.51841	8.42956	8.69613	8.73667	8.39394	8.80779	8.95623	8.59383	8.87278	8.61404	8.17611	8.73212	8.62662	8.44774	8.7308	8.39974
1	M1 UpD0 UpD6 Quiescence Vesicle SerumResponse	RANBP3	22.2222	9.23177	9.44718	9.19672	8.47993	8.8548	8.58789	10.8632	9.1149	8.87206	8.76632	9.23874	9.09206	8.79594	9.10506	9.03209	8.82539	8.99958	9.05795	8.77026	8.87651	8.86736	8.52684	8.96464	8.71443
1	M1 UpD0 UpD6 Quiescence Vesicle SerumResponse	RASSF1	22.2222	10.7523	10.6017	10.8439	9.47298	9.80707	9.53166	10.6247	10.0124	9.88454	9.59824	10.1391	9.87263	9.84643	10.4136	10.0696	9.82863	10.1504	10.069	9.75281	9.86858	9.743	9.78349	9.75454	9.72705
1	M1 UpD0 UpD6 Quiescence Vesicle SerumResponse	RIPK3	22.2222	9.74533	9.65326	9.72015	8.55423	8.59388	8.5753	9.758	9.13141	8.79068	8.65678	9.23743	9.12914	8.91084	9.33411	9.25981	8.83783	9.27095	9.19348	8.73358	9.21192	9.09248	8.72373	9.06267	8.90026
1	M1 UpD0 UpD6 Quiescence Vesicle SerumResponse	RNF24	22.2222	9.00453	9.60182	8.97262	8.37004	8.35817	8.29574	8.79325	8.62728	8.68521	8.34816	8.78079	8.42031	8.44414	8.6683	8.69372	8.34719	8.52012	8.43388	8.31716	8.42223	8.48705	8.39744	8.42044	8.2611
1	M1 UpD0 UpD6 Quiescence Vesicle SerumResponse	RPL32P3	22.2222	10.657	9.97173	10.3085	9.26918	9.84738	9.56235	9.97136	9.95826	9.70674	9.61288	10.1268	9.77348	9.65283	9.91197	9.76969	9.66456	10.0172	10.0634	9.55335	9.89164	9.79725	9.81945	9.73488	9.63593
1	M1 UpD0 UpD6 Quiescence Vesicle SerumResponse	SPI1	22.2222	10.5972	11.0253	10.5758	9.43714	9.3438	9.41847	10.3154	10.0787	9.71893	9.63975	9.97308	9.89273	9.30935	10.0504	9.94032	9.48522	10.1713	10.0576	9.30192	10.098	9.76616	9.56653	9.79596	9.79253
1	M1 UpD0 UpD6 Quiescence Vesicle SerumResponse	TLN1	22.2222	11.4091	11.7583	11.4294	10.5385	10.7005	10.7138	12.7648	11.0671	11.1445	10.5852	10.7749	11.0324	10.7888	11.3704	11.3743	10.789	11.3635	11.3444	10.6229	11.3709	11.0906	10.6398	11.2278	10.9691
1	M1 UpD0 UpD6 Quiescence Vesicle SerumResponse	TNK2	22.2222	11.9287	11.8798	12.0186	10.1187	10.0954	10.1565	12.4544	11.5416	10.8972	9.78208	11.2543	11.1657	10.1406	11.3348	11.2913	10.3024	11.1133	11.4105	10.502	10.9974	11.1022	10.8805	11.2743	11.2388
1	M1 UpD0 UpD6 Quiescence Vesicle SerumResponse	BLCAP	21.2121	11.3501	11.8034	11.0738	9.02382	9.31701	8.96476	10.1838	10.0393	9.1088	9.4565	9.99276	9.6159	9.25467	9.53392	9.50161	9.28595	9.63255	9.35197	9.08021	10.0059	9.49327	9.19202	9.6353	9.34976
1	M1 UpD0 UpD6 Quiescence Vesicle SerumResponse	IKBKE	21.2121	9.84897	9.93158	9.20431	8.71529	8.84417	8.49289	9.0591	9.08568	8.34296	8.5634	9.16424	8.94917	8.60813	9.08171	8.90855	8.63472	9.30723	8.76351	8.54794	9.25062	8.81164	8.66652	8.95235	8.58903
1	M1 UpD0 UpD6 Quiescence Vesicle SerumResponse	WDR6	21.2121	12.6186	12.6879	12.4832	11.189	11.5738	11.0609	11.8798	12.1376	11.3852	11.6664	12.1437	11.972	11.1637	11.9287	11.6821	11.0949	11.8316	11.4126	11.2472	11.8441	11.527	11.3298	12.1707	11.6828
1	M1 UpD0 UpD6 Quiescence Vesicle SerumResponse	CCDC97	20.202	10.9753	11.8658	11.1097	9.43078	9.67152	9.71696	10.749	10.8165	10.3803	10.0344	10.6102	10.5562	9.91489	10.471	10.5417	9.71997	10.3967	10.4131	9.7327	10.4852	10.444	9.51513	10.3752	10.3153
1	M1 UpD0 UpD6 Quiescence Vesicle SerumResponse	CRY2	20.202	10.6355	10.6472	10.471	8.81164	8.97948	8.9696	9.59319	9.59972	9.19854	9.09177	9.39212	9.33822	9.01399	9.24899	9.23678	9.01937	9.15486	9.19885	8.97909	9.06258	9.09146	9.19424	9.2975	9.33945
1	M1 UpD0 UpD6 Quiescence Vesicle SerumResponse	DEDD	20.202	10.4	10.9826	10.4138	9.85884	10.1202	9.95305	10.5862	10.2835	10.1202	9.95599	10.4879	10.1929	9.69928	10.255	10.2603	9.77778	10.2165	9.84782	9.75217	10.1808	10.0172	9.97154	10.3526	9.98741
1	M1 UpD0 UpD6 Quiescence Vesicle SerumResponse	INTS4	20.202	10.7928	10.7993	10.7628	10.183	10.5775	10.2769	11.9485	10.5639	10.5221	10.1767	10.6589	10.616	10.325	10.5857	10.5077	10.1904	10.5527	10.4956	10.2803	10.6011	10.551	10.3643	10.7099	10.478
1	M1 UpD0 UpD6 Quiescence Vesicle SerumResponse	MAP3K11	20.202	10.0129	10.2407	9.92758	9.24269	9.33745	9.25112	10.0391	9.98384	9.5901	9.43382	9.90373	9.76827	9.18718	9.614	9.45215	9.10001	9.63368	9.5901	9.01684	9.78145	9.30297	8.91518	9.59909	9.37121
1	M1 UpD0 UpD6 Quiescence Vesicle SerumResponse	MIB2	20.202	9.20293	9.60998	9.34697	8.72979	9.00505	8.7069	9.92893	9.33304	8.87491	8.6018	9.39999	9.07271	8.4312	9.23076	8.97934	8.39555	8.87216	8.82486	8.39644	8.9845	8.83129	8.67707	9.27253	8.74936
1	M1 UpD0 UpD6 Quiescence Vesicle SerumResponse	PRRC2B	20.202	9.33534	9.09031	9.12482	8.22361	8.52223	8.127	9.59431	8.5561	8.40818	8.40572	8.59376	8.46274	8.44924	8.61121	8.43744	8.34455	8.59976	8.51852	8.38008	8.40597	8.40428	8.19822	8.42162	8.40602
1	M1 UpD0 UpD6 Quiescence Vesicle SerumResponse	RAPGEF1	20.202	13.0949	12.8509	12.7745	11.9769	12.182	11.9917	13.6568	12.2938	12.1457	12.0509	12.1707	12.2133	11.8424	12.0986	12.1447	11.5808	12.0845	12.0533	11.6116	12.2536	12.0422	11.876	12.3693	12.0712
1	M1 UpD0 UpD6 Quiescence Vesicle SerumResponse	RBM5	20.202	12.6216	12.1603	12.4908	11.1488	11.4936	11.1525	11.6816	12.1969	11.6533	11.6913	11.9778	11.8306	11.3798	11.7798	11.5988	11.399	11.6413	11.8292	11.3908	11.7712	11.553	11.5225	12.0259	11.7649
1	M1 UpD0 UpD6 Quiescence Vesicle SerumResponse	STK11IP	20.202	9.44673	10.0164	9.47667	8.62758	8.98913	8.63304	10.0047	9.43709	8.91389	8.89932	9.44021	9.20431	8.7093	9.19809	8.92943	8.66093	9.26416	8.73976	8.83619	9.22438	8.8599	8.62349	9.29063	8.87197
1	M1 UpD0 UpD6 Quiescence Vesicle SerumResponse	ZCCHC3	20.202	9.33534	9.24611	9.15066	8.62172	8.77689	8.76864	9.64307	9.23595	8.92393	8.81082	9.12903	9.00272	8.64413	8.91787	8.80841	8.75878	9.01789	8.76988	8.59233	8.99734	8.78494	8.82012	8.93758	8.67724
1	M1 UpD0 UpD6 Quiescence Vesicle SerumResponse	ZFPM1	20.202	9.75017	9.89125	9.78438	8.63818	8.78318	8.63304	9.98775	9.55351	9.01863	8.71702	9.32832	8.94044	8.52528	9.21738	8.83999	8.46073	9.06568	8.82285	8.37659	9.25234	8.72435	8.6258	9.32818	8.70919
1	M1 UpD0 UpD6 Quiescence Vesicle SerumResponse	ZNF384	20.202	9.46655	9.76553	9.65444	8.96379	9.13537	8.96004	10.5572	9.51006	9.34039	8.91953	9.28466	9.2439	8.76909	9.32994	9.27188	8.86896	9.34222	9.21171	8.92091	9.28367	9.15395	8.97739	9.38202	8.88416
1	M1 UpD0 UpD6 Quiescence Vesicle SerumResponse	ZNF446	20.202	9.2079	9.41692	9.08213	8.61912	8.35702	8.43231	9.60182	8.81927	8.53344	8.81055	8.88255	8.57257	8.42558	8.59628	8.63067	8.43739	8.60699	8.49003	8.40382	8.60408	8.51294	8.29219	8.74546	8.5093
1	M1 UpD0 UpD6 Quiescence Vesicle SerumResponse	F8A1	19.1919	9.72855	10.232	9.49432	8.99039	9.46345	9.00819	10.6071	9.98975	9.02795	9.47057	9.92758	9.52645	9.12831	9.59715	9.31942	9.06111	9.54468	8.86424	9.02267	9.65886	9.03782	8.93878	9.70636	9.06546
1	M1 UpD0 UpD6 Quiescence Vesicle SerumResponse	NPLOC4	19.1919	9.75381	9.60056	9.49498	8.9218	9.19746	8.86206	11.3629	9.7717	9.18498	9.28393	9.90625	9.41782	9.07942	9.45805	9.23705	8.99818	9.57684	8.95369	9.06783	9.51146	8.9947	8.77751	9.56632	9.09766
1	M1 UpD0 UpD6 Quiescence Vesicle SerumResponse	NUDCD3	19.1919	10.1682	10.0088	9.55254	9.2192	9.631	9.17023	9.77547	9.9415	9.22758	9.53977	9.7514	9.52063	9.11111	9.5863	9.24941	9.22768	9.56364	8.95303	9.10303	9.5	9.24814	8.9696	9.47747	9.3009
1	M1 UpD0 UpD6 Quiescence Vesicle SerumResponse	PPP2R5A	19.1919	10.7631	10.7759	10.5036	9.67597	10.0171	9.69728	10.5379	10.3982	9.83241	9.84107	10.3613	10.104	9.72478	10.1859	9.81359	9.39363	10.2037	9.70257	9.46514	10.101	9.7221	9.61246	10.0505	9.67687
1	M1 UpD0 UpD6 Quiescence Vesicle SerumResponse	TMEM101	19.1919	10.4934	10.5662	10.2481	10.1212	10.3887	10.146	10.4297	10.6487	9.88896	10.1159	10.3733	10.3376	9.8813	10.2689	10.1449	9.92116	10.2871	10.0023	9.89608	10.2954	10.2607	10.1686	10.162	10.2237
1	M1 UpD0 UpD6 Quiescence Vesicle SerumResponse	MFN2	18.1818	9.83177	9.90373	9.64292	9.21115	9.71295	9.26289	9.72956	9.865	9.515	9.56603	9.79247	9.64926	9.57752	9.76751	9.47906	9.46196	9.65027	9.55491	9.33773	9.67485	9.41367	8.96158	9.67093	9.33605
1	M1 UpD0 UpD6 Quiescence Vesicle SerumResponse	RPP25L	18.1818	10.1598	10.5313	10.0399	10.3232	10.4917	10.1135	10.2463	10.4218	9.77961	9.83263	10.3943	10.1297	9.7781	9.90923	9.88071	9.88402	10.1012	9.79247	9.83881	10.368	9.97941	10.004	10.2958	9.91506
1	M1 UpD0 UpD6 Quiescence Vesicle SerumResponse	SIPA1	18.1818	11.1902	11.4884	11.2407	9.87751	10.1196	10.0039	10.7337	9.99323	9.94516	9.51068	9.97582	9.93698	9.73049	10.5688	10.1803	9.84586	10.5808	10.192	9.88089	10.5171	9.99917	9.80849	10.2667	9.73736
1	M1 UpD0 UpD6 Quiescence Vesicle SerumResponse	ZNF362	18.1818	9.93973	9.68926	9.89191	8.69462	8.66437	8.69671	9.77499	9.13017	8.85082	8.81918	9.28525	9.23088	8.77851	8.95091	9.09892	8.62676	8.9364	9.04027	8.5987	9.08451	8.92811	8.69105	8.9478	8.94639
1	M1 UpD0 UpD6 Quiescence Vesicle SerumResponse	ALOX5	17.1717	13.8805	13.574	13.7374	12.2865	12.9595	12.5722	13.5716	12.8555	12.1769	12.1613	12.8762	12.5585	12.5618	12.9124	12.6879	11.8512	13.2132	12.7797	11.7005	13.1772	11.9955	12.6317	12.4914	11.9695
1	M1 UpD0 UpD6 Quiescence Vesicle SerumResponse	BTBD2	17.1717	12.8189	12.9817	12.7797	11.0376	11.4652	11.6068	11.8867	11.7604	11.4998	11.0376	11.7263	11.4754	11.1321	11.7263	11.5909	10.8367	11.6156	11.4839	10.8272	11.6728	11.1573	11.5036	11.4839	11.022
1	M1 UpD0 UpD6 Quiescence Vesicle SerumResponse	CARMIL2	17.1717	9.15591	9.25001	9.08421	8.38862	8.76249	8.61843	11.0393	8.86167	8.48367	8.41188	8.89762	8.79303	8.41195	8.9721	8.57811	8.29012	8.81032	8.52641	8.26459	8.79678	8.37286	8.18157	8.75484	8.3013
1	M1 UpD0 UpD6 Quiescence Vesicle SerumResponse	CYB561A3	17.1717	12.9705	13.5911	13.211	10.5637	10.9534	10.2875	11.2642	11.0868	10.6609	10.5252	11.1417	10.9564	10.2527	11.0192	10.9831	10.086	11.1525	10.7983	10.0782	11.4201	10.657	9.63368	10.9173	10.2249
1	M1 UpD0 UpD6 Quiescence Vesicle SerumResponse	KIAA1683	17.1717	11.2453	10.2395	10.4861	8.15513	8.25707	8.19064	8.45756	8.40545	8.27302	8.23475	8.28252	8.19577	8.33455	8.50918	8.28907	8.27099	8.46566	8.27822	8.12276	8.424	8.10126	8.33001	8.03259	8.08111
1	M1 UpD0 UpD6 Quiescence Vesicle SerumResponse	NELFA	17.1717	9.10983	9.0999	8.76358	8.50994	8.91768	8.66548	9.58025	8.91229	8.61041	8.5407	8.87353	8.72346	8.75229	8.69215	8.64331	8.5176	8.87115	8.43834	8.47408	8.91719	8.6212	8.49325	8.93063	8.62985
1	M1 UpD0 UpD6 Quiescence Vesicle SerumResponse	NISCH	17.1717	11.5395	11.6844	11.5318	9.62712	10.0498	9.83463	10.2636	10.4526	9.94696	9.50604	10.2795	10.0393	9.5566	10.2403	10.1236	9.59823	10.2974	10.1718	9.57269	10.3585	9.65427	9.51915	10.0513	9.58673
1	M1 UpD0 UpD6 Quiescence Vesicle SerumResponse	PARP16	17.1717	9.01727	9.32057	9.17092	8.32137	8.82414	8.51897	9.74665	8.98056	8.49044	8.39335	8.78723	8.67208	8.4106	8.77435	8.57403	8.29057	8.51568	8.301	8.4355	8.6657	8.48199	8.45432	8.73722	8.4919
1	M1 UpD0 UpD6 Quiescence Vesicle SerumResponse	PILRB	17.1717	11.6689	11.4126	11.772	9.62546	9.84958	9.56291	10.2949	10.052	9.53095	9.10453	9.87042	9.32923	9.15172	9.98832	9.67252	9.1839	9.92663	9.74665	9.20722	9.77678	9.30935	9.07353	9.70377	8.98826
1	M1 UpD0 UpD6 Quiescence Vesicle SerumResponse	PIP4P1	17.1717	10.1161	10.1501	10.3451	9.64424	10.033	9.67847	10.466	10.1311	9.88929	9.52227	10.0077	9.73814	9.64546	10.1375	9.86375	9.40324	10.0631	9.6216	9.24104	9.95095	9.60656	9.38586	9.8501	9.53977
1	M1 UpD0 UpD6 Quiescence Vesicle SerumResponse	POLD4	17.1717	10.6262	11.2669	10.7058	9.72879	9.83241	9.73585	11.8716	9.86225	9.49694	9.41578	9.91459	9.73076	9.41123	10.0215	9.84991	9.22196	10.1489	9.83121	8.99773	9.84107	9.12054	9.40014	9.73993	9.22981
1	M1 UpD0 UpD6 Quiescence Vesicle SerumResponse	THADA	17.1717	9.75616	9.53594	9.61603	9.34959	9.9253	9.42798	9.65662	9.51062	9.06783	8.87701	9.55648	9.32879	9.07121	9.34491	9.18647	8.8895	9.43844	9.12	8.91303	9.29397	9.00043	8.73143	9.39849	8.89891
1	M1 UpD0 UpD6 Quiescence Vesicle SerumResponse	WASH2P	17.1717	11.0109	11.2504	11.168	9.46791	10.038	9.59838	11.4585	10.1535	9.44554	9.44421	10.2931	9.80677	9.44231	9.98911	9.88101	9.34479	9.97723	9.69337	9.53131	9.98557	9.5701	9.36959	9.87886	9.51851
1	M1 UpD0 UpD6 Quiescence Vesicle SerumResponse	WASH3P	17.1717	11.3447	11.2867	11.3337	9.51758	9.80432	9.47827	10.9415	10.4177	9.69596	9.39956	10.2974	9.75441	9.42666	9.99183	10.0693	9.45486	10.1698	9.82636	9.3837	9.90344	9.55955	9.38533	9.88762	9.3583
1	M1 UpD0 UpD6 Quiescence Vesicle SerumResponse	XRCC1	17.1717	9.90661	10.4717	9.63114	9.51644	9.60368	9.49312	10.6604	9.82832	9.27732	9.47906	9.95886	9.53095	9.3837	9.79863	9.55913	9.33259	9.57882	9.38609	9.36728	9.61651	9.40079	9.31651	9.73076	9.44421
1	M1 UpD0 UpD6 Quiescence Vesicle SerumResponse	CRK	15.1515	9.67262	9.41115	9.2471	8.79969	8.93765	8.73239	10.4475	9.31377	9.63656	9.15118	9.35691	9.34533	9.2659	9.39899	9.29529	9.20744	9.38155	9.36722	9.09101	9.3095	9.3743	9.19969	9.21955	9.46226
1	M1 UpD0 UpD6 Quiescence Vesicle SerumResponse	KLHL21	15.1515	8.8281	8.95294	8.61772	8.20243	8.37299	8.28247	10.5196	8.74005	8.90397	8.52641	8.87756	8.62104	8.44487	8.88462	8.59264	8.56421	8.82467	8.68035	8.6355	8.59189	8.54984	8.42862	8.6018	8.57949
1	M1 UpD0 UpD6 Quiescence Vesicle SerumResponse	ORAI3	14.1414	8.91982	9.03594	8.96735	8.18635	8.19696	8.25455	9.64666	8.34655	8.28896	8.186	8.44158	8.48342	8.07715	8.27447	8.4322	8.01468	8.31703	8.20787	7.99259	8.22703	8.19374	8.22297	8.31317	8.2078
1	M1 UpD0 UpD6 Quiescence Vesicle SerumResponse	FAM153B	13.1313	9.08977	8.94192	9.36237	8.42057	8.62709	8.75545	8.7956	8.69198	8.76832	8.42096	8.54805	8.63695	8.43165	8.57463	8.77963	8.48377	8.65238	8.55715	8.39033	8.63313	8.52772	8.66903	8.63005	8.58343
1	M1 UpD0 UpD6 Quiescence Vesicle SerumResponse	SLC6A16	13.1313	10.5811	10.6453	10.3464	8.23594	8.28288	8.39463	8.48686	8.31322	8.31265	8.07691	8.34832	8.36101	8.20728	8.21801	8.28069	8.17137	8.39753	8.29162	8.24843	8.21255	8.13418	8.60746	8.24322	8.2532
1	M1 UpD0 UpD6 Quiescence Vesicle SerumResponse	FBXO7	12.1212	10.9546	11.054	10.5562	10.3607	10.5407	10.4239	11.4069	10.8074	10.6051	10.4649	10.7546	10.7685	10.3376	10.829	10.6013	10.0805	10.5884	10.4867	10.086	10.6854	10.4903	10.0103	10.7584	10.3248
1	M1 UpD0 UpD6 Quiescence Vesicle SerumResponse	LOC648176	12.1212	9.14683	9.09304	8.97042	8.4675	8.55161	8.49371	9.01312	8.48903	8.54608	8.52585	8.54363	8.56015	8.39649	8.67969	8.78087	8.50486	8.52985	8.51233	8.47016	8.61891	8.61014	8.38936	8.58005	8.52253
1	M1 UpD0 UpD6 Quiescence Vesicle SerumResponse	OTUD5	12.1212	9.16172	9.02441	8.96207	8.49361	8.5499	8.48158	8.92678	8.79713	8.80003	8.67373	8.72826	8.84838	8.63854	8.75971	8.80502	8.47363	8.6497	8.46789	8.44866	8.70233	8.7199	8.51996	8.69026	8.74289
1	M1 UpD0 UpD6 Quiescence Vesicle SerumResponse	TESK1	12.1212	9.91981	10.2849	10.0183	9.07508	9.0533	9.07329	10.4133	9.79084	9.66057	9.13772	9.56206	9.44341	8.76731	9.2912	9.12806	8.6657	9.06568	8.9233	8.66637	9.38381	9.13042	8.7718	9.36827	9.25921
1	M1 UpD0 UpD6 Quiescence Vesicle SerumResponse	FAM234A	11.1111	9.28455	9.60341	9.2724	8.69097	8.79972	8.61594	9.19798	9.20909	8.93108	8.75249	8.90655	9.03363	8.52528	8.68738	8.84291	8.27621	8.54328	8.48239	8.15428	8.83353	8.62011	8.39	8.83728	8.66072
1	M1 UpD0 UpD6 Quiescence Vesicle SerumResponse	HS.576106	11.1111	11.9401	12.0489	11.8222	9.18437	9.33372	9.40408	10.3029	10.0754	9.99307	9.9188	9.55913	9.78421	9.03219	9.38729	9.51019	8.85861	9.473	9.49212	8.81379	9.59244	9.36235	9.31325	9.4738	9.37704
1	M1 UpD0 UpD6 Quiescence Vesicle SerumResponse	IL17RA	11.1111	9.09389	8.80488	8.79111	8.10161	8.44092	8.31955	9.31477	8.98122	8.78151	8.56446	8.67499	8.81242	8.18594	8.81998	8.62879	8.21985	8.97242	8.59685	8.23321	8.93144	8.80408	8.35447	8.56243	8.62391
1	M1 UpD0 UpD6 Quiescence Vesicle SerumResponse	NCF1C	11.1111	10.9701	11.3794	11.4193	10.6123	10.1513	10.3471	10.589	10.6453	10.7844	10.854	10.5359	10.7523	10.4382	10.2992	10.4223	10.0088	10.33	10.4113	10.1774	10.592	10.6283	10.5518	10.5719	10.7561
1	M1 UpD0 UpD6 Quiescence Vesicle SerumResponse	NUMA1	11.1111	10.6798	11.064	10.8489	9.27095	9.66146	9.55319	10.9126	10.313	10.0988	9.54835	10.1063	10.2137	9.39321	10.1449	10.0179	9.25562	10.0267	9.79657	9.23894	10.1163	9.83448	9.19291	9.8196	9.57766
1	M1 UpD0 UpD6 Quiescence Vesicle SerumResponse	SAMD4B	11.1111	8.84332	8.90063	9.0116	8.42573	8.61108	8.46666	11.162	8.94164	8.79972	8.59756	8.68707	8.79026	8.44097	8.67578	8.74775	8.35545	8.7818	8.50486	8.37029	8.75392	8.68746	8.3723	8.67793	8.58005
1	M1 UpD0 UpD6 Quiescence Vesicle SerumResponse	WASF2	11.1111	10.7104	10.5901	10.5662	9.30538	9.68847	9.53239	11.0476	10.1488	9.86562	9.57446	9.71416	9.73556	9.32832	9.941	9.90224	9.25994	10.0981	9.69222	9.08202	9.84974	9.81897	9.14725	9.64138	9.66425
1	M1 UpD0 UpD6 Quiescence Vesicle SerumResponse	WDR13	11.1111	10.3005	10.667	10.5739	9.97787	9.87648	10.0498	10.5013	10.1453	10.1033	9.89591	10.3115	10.121	9.67834	9.96778	10.0836	9.49188	9.8089	9.61603	9.41164	10.0709	9.65027	9.95021	10.2557	9.89902
1	M1 UpD0 UpD6 Quiescence Vesicle SerumResponse	LRRC47	10.101	10.7366	10.9193	10.9847	10.3338	10.5191	10.4333	10.933	10.8392	10.8064	10.6994	10.8088	10.9261	10.5487	10.4842	10.7291	10.4905	10.3733	10.5403	10.3309	10.4944	10.4971	10.3243	10.731	10.6155
1	M1 UpD0 UpD6 Quiescence Vesicle SerumResponse	RNF114	10.101	11.8237	11.8039	11.5801	10.7334	10.6626	10.6026	11.0412	10.8425	10.803	10.8403	10.7472	10.7934	10.6575	10.6176	10.6634	10.6439	10.5425	10.5907	10.6116	10.6634	10.6323	10.5222	10.7248	10.7298
1	M1 UpD0 UpD6 Quiescence Vesicle SerumResponse	NADSYN1	9.09091	10.6123	10.502	10.4911	9.7948	9.92014	9.84075	10.9888	10.0407	10.0797	9.68811	10.0162	9.96426	9.68926	10.0431	10.1086	9.4886	9.97485	9.7997	9.69396	10.107	9.90359	9.40156	9.81813	9.67526
1	M1 UpD0 UpD6 Quiescence Vesicle SerumResponse	ZNF276	9.09091	8.66852	8.67869	8.63925	8.28456	8.30393	8.24995	8.50998	8.36406	8.29489	8.16384	8.34489	8.2227	8.19445	8.18428	8.38532	8.13021	8.34018	8.12374	8.26334	8.37164	8.45824	8.2001	8.33675	8.13255
1	M1 UpD0 UpD6 Quiescence Vesicle SerumResponse	FCHO1	7.07071	9.54773	9.37738	9.76485	8.16761	8.18147	8.35478	8.5442	8.31811	8.33386	8.16563	8.22218	8.40368	8.08423	8.48595	8.35813	8.13641	8.47919	8.32437	8.07057	8.41041	8.35036	8.09641	8.31792	8.33673
1	M1 UpD0 UpD6 Quiescence Vesicle SerumResponse	FCMR	7.07071	14.0741	14.3267	14.4426	11.069	11.8751	11.497	11.9613	11.4754	11.6503	10.5412	11.4272	11.808	10.5735	12.069	11.9985	10.7793	12.1568	12.0732	10.7114	12.0975	11.5135	11.022	11.8903	11.2349
1	M1 UpD0 UpD6 Quiescence Vesicle SerumResponse	SPPL2B	3.0303	8.74537	8.90873	8.72791	8.0937	8.20908	8.17035	8.30902	8.53025	8.24154	8.26459	8.59023	8.35269	8.20448	8.56178	8.64017	8.29057	8.65038	8.43712	8.27129	8.66113	8.24669	8.38392	8.6258	8.48379
1	M1 UpD0 UpD6 Quiescence Vesicle SerumResponse	ABHD17AP1	2.0202	9.66531	9.84782	9.61472	9.2349	9.2913	9.39564	9.62073	9.46393	9.32644	9.04221	9.48756	9.35994	9.02371	9.71943	9.46319	9.10146	9.74835	9.88448	9.0495	9.70829	9.51353	9.02567	9.60886	9.35487
1	M1 UpD0 UpD6 Quiescence Vesicle SerumResponse	ABHD17AP4	2.0202	10.2962	10.2017	10.1229	9.49297	9.63938	9.7316	9.78168	9.85357	9.58517	9.33714	9.71685	9.61228	9.23766	10.0094	9.80739	9.4624	10.3032	10.1353	9.49432	10.1232	10.0037	9.60944	10.1676	9.97349
1	M1 UpD0 UpD6 Quiescence Vesicle SerumResponse	ABHD17AP6	2.0202	9.74753	9.40939	9.71722	9.20431	9.14313	9.18596	9.26033	9.25981	9.51851	9.05724	9.35197	9.26843	9.00972	9.59956	9.38544	9.01133	9.58491	9.63016	8.97273	9.43629	9.50046	8.9986	9.61246	9.3949
1	M1 UpD0 UpD6 Quiescence Vesicle SerumResponse	ACAP1	2.0202	11.5241	11.5174	11.3049	10.6343	10.7595	10.6189	10.5882	11.0482	10.6745	10.0932	11.059	10.7599	10.2141	11.4718	11.1513	10.3846	11.4233	11.0192	10.3752	11.3544	10.9579	10.6355	11.1731	10.8116
1	M1 UpD0 UpD6 Quiescence Vesicle SerumResponse	DENND4B	2.0202	11.4497	11.308	11.5347	9.91413	10.3912	9.78296	10.3045	10.588	10.1393	9.90907	10.4276	10.4088	9.86153	10.7744	10.5974	9.83382	10.9918	10.4518	9.6963	10.9924	10.3198	9.91115	10.7334	10.1442
1	M1 UpD0 UpD6 Quiescence Vesicle SerumResponse	GPSM3	2.0202	12.3997	12.768	12.4213	10.557	10.6033	10.6604	10.7387	10.743	10.8211	10.3316	11.0393	10.9138	10.5029	11.5801	11.318	10.5132	11.6712	11.5808	10.1191	11.2434	11.0604	10.4194	11.1921	10.8745
1	M1 UpD0 UpD6 Quiescence Vesicle SerumResponse	LOC644590	2.0202	9.41692	9.12441	9.40553	8.73367	8.73109	8.77669	8.88435	8.89882	8.81046	8.72068	8.78365	8.87143	8.52923	8.87397	8.92245	8.40823	8.99991	8.83746	8.48469	9.13093	8.93547	8.62272	9.05016	8.77217
1	M1 UpD0 UpD6 Quiescence Vesicle SerumResponse	LOC728014	2.0202	12.1357	12.3088	11.876	9.58776	9.77602	9.51521	9.89554	10.1838	9.80129	9.70197	10.0439	10.0729	9.46595	10.6724	10.5623	9.71783	10.9614	10.598	9.77873	11.045	10.2528	9.85759	10.7961	10.1
1	M1 UpD0 UpD6 Quiescence Vesicle SerumResponse	MMP11	2.0202	8.68385	9.01146	8.676	7.9842	7.94911	8.00378	8.04079	8.07485	8.01653	7.99418	8.028	7.97158	7.97603	8.18525	8.04879	7.97531	8.17324	8.03137	7.97125	8.24807	8.09679	7.94973	8.00895	7.99782
1	M1 UpD0 UpD6 Quiescence Vesicle SerumResponse	PI4KAP2	2.0202	10.2666	10.3597	10.6974	9.16102	9.492	9.34135	9.38507	9.71073	9.49351	9.12151	9.51019	9.63285	9.07652	9.87284	9.68777	9.0873	9.77313	9.72956	9.25909	9.9056	9.57781	9.32159	9.95458	9.53113
1	M1 UpD0 UpD6 Quiescence Vesicle SerumResponse	R3HDM4	2.0202	12.4111	12.4555	12.2031	10.8822	11.3896	11.3194	11.3364	11.5845	11.4077	10.8779	11.5425	11.5787	10.8042	11.9704	11.6205	10.6561	12.0204	11.699	10.7034	11.778	11.5754	10.9247	11.7622	11.5333
1	M1 UpD0 UpD6 Quiescence Vesicle SerumResponse	ST3GAL1	2.0202	10.9205	11.4314	10.9558	9.16659	9.52227	8.93869	9.44509	9.47204	9.27253	9.01863	9.70538	9.10337	8.99911	9.96664	9.56673	8.95996	9.93925	9.5889	9.01324	9.74376	9.65251	9.02257	9.75705	9.316
1	M1 UpD0 UpD6 Quiescence Vesicle SerumResponse	TPP1	2.0202	11.9685	12.1386	11.8398	10.1655	10.5138	10.5954	10.8785	10.7878	11.05	9.86182	10.5763	10.8134	10.2989	11.3454	11.2019	10.4356	11.2674	11.4797	10.1674	11.1506	11.0423	10.7754	11.1743	11.0635
2	M2 UpD0-D3.6h IRF4_Induced NFkB_Signalling	IL27RA	96.9697	10.1513	10.1795	10.0162	9.69492	9.53624	9.18449	9.62775	9.45293	9.13654	9.44634	9.09463	9.00101	8.99676	9.3409	8.82339	8.98064	9.4527	9.00243	8.7441	9.20247	9.07912	8.63579	9.28989	9.09315
2	M2 UpD0-D3.6h IRF4_Induced NFkB_Signalling	LOC646044	95.9596	9.67905	9.99444	9.83675	9.11393	9.08158	8.97081	10.1202	9.15316	8.99829	9.15789	8.94056	8.90607	8.76126	9.12441	8.88173	8.8936	8.99377	8.84448	8.8705	8.98789	9.05888	8.61028	8.88368	8.6544
2	M2 UpD0-D3.6h IRF4_Induced NFkB_Signalling	LOC650739	95.9596	8.54705	9.18257	9.06751	8.39995	8.43017	8.40582	9.39321	8.68583	8.42181	8.3161	8.46194	8.33999	8.17353	8.43541	8.37119	8.20267	8.38378	8.29901	8.29239	8.34543	8.38907	8.28366	8.10997	8.19438
2	M2 UpD0-D3.6h IRF4_Induced NFkB_Signalling	LOC650832	95.9596	10.7855	11.2161	10.9682	10.6959	10.8574	10.8074	12.9469	11.0649	10.7228	11.1221	10.7186	10.6717	10.2111	11.0829	10.5629	10.5217	10.85	10.4021	10.397	10.874	10.4513	10.6954	10.6873	10.2795
2	M2 UpD0-D3.6h IRF4_Induced NFkB_Signalling	MAP2K3	95.9596	11.3684	11.387	11.481	11.1357	11.3348	11.23	12.9538	11.3811	11.1362	11.5315	11.2529	11.0778	10.5723	11.3811	10.6526	10.6512	11.2718	10.5974	10.8064	11.426	10.6994	11.0169	11.1719	10.6201
2	M2 UpD0-D3.6h IRF4_Induced NFkB_Signalling	CNTRL	94.9495	10.5974	10.2769	10.5686	9.70407	10.2615	9.67952	9.87457	9.76309	9.43295	9.72909	9.80724	9.53309	9.7658	10.0873	9.75441	9.73034	10.0653	9.75207	9.30698	9.5472	9.72429	9.40315	9.68542	9.6024
2	M2 UpD0-D3.6h IRF4_Induced NFkB_Signalling	D2HGDH	94.9495	10.6254	10.1763	10.1853	9.67847	10.1019	9.55985	9.40895	9.44718	9.34697	9.43343	9.33452	8.78619	9.14349	9.4658	8.89925	9.16907	9.47231	9.08593	8.93769	9.55091	8.57326	8.89925	9.24259	8.61169
2	M2 UpD0-D3.6h IRF4_Induced NFkB_Signalling	DHX58	94.9495	9.62341	9.72559	9.58148	9.01976	9.11111	8.85852	9.6696	8.82548	8.6612	8.61983	8.97227	8.60174	8.49497	8.64924	8.6532	8.53654	8.80895	8.62003	8.42672	8.65552	8.35953	8.4402	8.59815	8.30511
2	M2 UpD0-D3.6h IRF4_Induced NFkB_Signalling	H3F3B	94.9495	12.9032	13.2851	13.2617	11.3236	11.5545	11.5086	10.5348	10.8098	10.8814	10.7222	10.8236	10.1834	10.2029	10.6914	10.4472	10.2632	10.6131	10.1804	9.86895	10.7572	9.81758	9.78404	10.5749	10.0608
2	M2 UpD0-D3.6h IRF4_Induced NFkB_Signalling	LAMTOR4	94.9495	11.5917	11.4891	11.5395	11.4624	11.4645	11.3298	12.7084	11.1475	11.0383	10.9205	11.3786	10.9159	10.9128	11.4066	11.0624	11.0464	11.4825	10.9412	11.2306	11.2743	10.7954	10.7445	10.9656	10.3511
2	M2 UpD0-D3.6h IRF4_Induced NFkB_Signalling	SH2D3A	94.9495	8.593	9.13433	8.82827	8.43505	8.444	8.30497	10.2432	8.44432	8.27013	8.19999	8.26428	8.18657	8.18379	8.34976	8.18946	8.0957	8.35495	8.13662	8.22395	8.24095	8.17373	8.13003	8.22109	8.11842
2	M2 UpD0-D3.6h IRF4_Induced NFkB_Signalling	SLC25A37	94.9495	9.26891	8.86143	9.08961	8.73272	9.26553	8.81423	9.0576	8.28848	8.58357	8.2429	8.37138	8.20835	8.31278	8.54549	8.33592	8.2495	8.52565	8.2275	8.17482	8.3557	8.30003	8.27082	8.23299	8.20272
2	M2 UpD0-D3.6h IRF4_Induced NFkB_Signalling	SNHG7	94.9495	9.84529	10.2799	9.65934	8.95803	8.91739	8.48744	10.2143	9.08952	8.85335	9.07229	9.17428	8.6708	9.05176	8.91528	8.82835	9.20431	8.99336	8.87028	9.13313	8.79535	8.75528	8.70061	8.54844	8.45871
2	M2 UpD0-D3.6h IRF4_Induced NFkB_Signalling	TCEA2	94.9495	9.7044	9.78817	9.73062	9.11609	9.54571	9.46655	9.18619	9.42655	9.25679	8.94771	9.17142	9.00904	8.6906	9.15316	8.78173	8.72392	9.05666	8.85933	8.71686	9.09432	8.72845	8.66437	8.77529	8.54505
2	M2 UpD0-D3.6h IRF4_Induced NFkB_Signalling	ZSCAN18	94.9495	11.6566	11.7417	11.5212	10.4231	10.701	10.174	10.314	10.4909	10.1911	10.0576	10.3087	9.90224	9.56364	10.1711	9.85443	9.51225	10.0903	9.70062	9.10481	10.0751	9.33397	9.38263	9.67597	8.80824
2	M2 UpD0-D3.6h IRF4_Induced NFkB_Signalling	ARV1	93.9394	10.281	10.468	10.207	10.2723	10.2605	10.0971	10.6131	10.1344	9.8193	10.1914	10.2099	10.1116	10.1229	9.99522	9.93326	10.2332	10.1057	10.068	10.2822	10.1549	10.2748	10.0823	10.1878	10.1708
2	M2 UpD0-D3.6h IRF4_Induced NFkB_Signalling	CCDC12	93.9394	11.6152	11.7096	11.6487	11.0271	11.147	10.8716	11.2472	11.0339	10.7495	11.1407	11.1145	10.8039	10.9995	11.0529	10.739	10.9614	11.1748	10.6198	10.8745	11.1022	10.5313	10.6969	10.9444	10.5132
2	M2 UpD0-D3.6h IRF4_Induced NFkB_Signalling	CDK10	93.9394	11.4907	10.183	10.7167	10.4921	10.6472	9.84515	10.784	10.4645	9.76294	10.6271	10.5321	9.81571	10.4917	10.4813	10.0782	10.5109	10.554	9.98557	10.5321	10.4673	9.55306	10.4016	10.0785	9.59515
2	M2 UpD0-D3.6h IRF4_Induced NFkB_Signalling	CHCHD10	93.9394	11.9459	11.7249	11.6656	11.986	11.9333	11.352	12.3948	11.6068	11.2427	11.6331	11.3068	11.0715	11.2769	11.2656	10.9946	11.424	11.5878	11.303	11.6858	11.8126	11.6346	11.2943	11.4772	11.4665
2	M2 UpD0-D3.6h IRF4_Induced NFkB_Signalling	CXorf65	93.9394	8.65536	8.82232	8.76442	8.36442	8.23424	8.10163	8.19665	7.97395	7.98559	8.18473	8.08528	8.02881	8.07175	8.05772	8.06072	8.13418	8.07473	8.0342	8.05637	8.09834	8.02552	8.05999	8.07128	7.98692
2	M2 UpD0-D3.6h IRF4_Induced NFkB_Signalling	DNAAF5	93.9394	10.5438	10.7096	10.3479	10.4541	10.8478	9.85443	10.4097	10.3043	9.9788	10.3001	10.2879	9.86359	10.1116	10.1422	9.9866	10.2309	10.3024	9.9705	10.1171	10.293	9.82801	9.53392	9.9188	9.6722
2	M2 UpD0-D3.6h IRF4_Induced NFkB_Signalling	ERMARD	93.9394	9.82345	9.44469	9.5438	9.23123	9.39588	8.93406	9.19698	9.49561	8.74835	9.12818	9.39031	9.15416	9.29111	9.21945	9.13928	9.09784	9.31687	9.13609	9.09505	9.2222	9.033	9.19424	9.03078	8.89405
2	M2 UpD0-D3.6h IRF4_Induced NFkB_Signalling	ESAM	93.9394	8.71408	9.94316	8.83118	8.68325	8.97868	8.50706	9.67045	8.6309	8.5238	8.40044	8.61427	8.25541	8.33854	8.42754	8.30029	8.40278	8.58412	8.34927	8.38928	8.69489	8.15677	8.28311	8.71485	8.23403
2	M2 UpD0-D3.6h IRF4_Induced NFkB_Signalling	EYA3	93.9394	8.69138	9.42243	9.06248	9.05855	9.23149	8.90185	9.19013	8.96366	8.64202	8.65369	9.00625	8.37555	8.2664	8.83913	8.40597	8.47979	9.00554	8.47811	8.59612	9.10812	8.57409	8.50742	9.19843	8.35542
2	M2 UpD0-D3.6h IRF4_Induced NFkB_Signalling	FAM192A	93.9394	9.56504	9.58376	9.41456	8.82573	9.1458	8.70256	8.95303	9.04114	8.6965	8.7652	9.29514	8.85255	8.94835	9.14295	9.13032	8.99274	8.95819	8.94003	8.66637	8.80076	8.58138	8.69074	8.6015	8.49332
2	M2 UpD0-D3.6h IRF4_Induced NFkB_Signalling	LOC402677	93.9394	9.1609	9.98312	9.61893	9.0487	8.99941	8.86669	9.22244	8.80339	8.76667	8.78434	9.08912	8.82322	8.73449	8.89148	8.74146	8.83557	8.81063	8.66262	8.7847	8.81039	8.67334	8.76856	8.76018	8.66015
2	M2 UpD0-D3.6h IRF4_Induced NFkB_Signalling	NRIP1	93.9394	10.0205	10.6373	10.551	9.36973	9.55985	9.57988	9.72819	9.4394	9.48018	9.57766	9.49694	9.3237	9.43282	9.4621	9.30711	9.56944	9.70257	9.3949	9.34943	9.52227	9.24225	9.50059	9.47853	9.09698
2	M2 UpD0-D3.6h IRF4_Induced NFkB_Signalling	NSUN5P1	93.9394	9.04581	9.20647	9.17164	8.97019	8.87651	8.68077	9.29514	8.91103	8.71619	8.88498	8.94835	8.66637	8.7093	8.76589	8.63683	8.83336	8.91936	8.71128	8.76988	8.83239	8.73643	8.63393	8.93187	8.76554
2	M2 UpD0-D3.6h IRF4_Induced NFkB_Signalling	PAXX	93.9394	10.4993	10.5603	10.6632	10.1986	10.1964	9.72974	10.2381	10.3634	9.83963	10.0418	10.4066	9.9396	9.98415	10.338	9.95435	9.92862	10.3149	9.90907	9.57903	9.94392	9.71158	8.9257	9.64138	9.18169
2	M2 UpD0-D3.6h IRF4_Induced NFkB_Signalling	PRKX	93.9394	10.219	9.62191	9.4352	9.54482	9.62321	9.20843	10.7773	9.28539	9.09881	9.38341	9.17496	8.8021	9.16109	9.41737	8.8579	9.25967	9.37538	8.99905	9.16096	9.44365	8.94	9.14583	9.23262	8.86673
2	M2 UpD0-D3.6h IRF4_Induced NFkB_Signalling	PRR7	93.9394	8.71583	9.08755	8.75144	8.67571	8.75484	8.40834	9.66204	8.40446	8.4122	8.36822	8.34137	8.1027	8.09724	8.33295	8.18763	8.10768	8.45607	8.19293	8.30625	8.48817	8.34811	8.30133	8.456	8.28973
2	M2 UpD0-D3.6h IRF4_Induced NFkB_Signalling	RNF126	93.9394	10.8069	10.5477	10.7377	10.2864	10.4157	10.0672	10.4445	9.89871	10.0469	10.3081	10.2546	9.67919	10.3081	10.1493	9.78686	10.3224	10.1284	9.78884	10.2285	10.1166	9.68039	9.77662	9.96297	9.63194
2	M2 UpD0-D3.6h IRF4_Induced NFkB_Signalling	RPS10P14	93.9394	13.9091	14.3824	14	13.8228	13.9753	13.5984	14.3356	13.8705	13.2679	13.6316	13.8779	13.4544	13.2872	13.6712	13.4849	13.5245	13.7764	13.1998	13.4919	13.6568	13.3427	13.3037	13.5048	13.2019
2	M2 UpD0-D3.6h IRF4_Induced NFkB_Signalling	RPS9	93.9394	14.0126	14.3238	14.3138	13.9618	14.0167	13.9427	14.398	13.9863	13.5321	13.8042	14.1763	13.7081	13.662	14.0092	13.5392	13.5539	14.0093	13.633	13.6518	13.8394	13.5382	13.5401	13.6565	13.1797
2	M2 UpD0-D3.6h IRF4_Induced NFkB_Signalling	SIN3A	93.9394	10.8709	10.7038	10.7397	10.4749	10.7599	10.3338	10.5646	10.7595	10.4585	10.4501	10.7201	10.3009	10.5379	10.7667	10.3617	10.4244	10.6205	10.3824	10.1184	10.4008	10.0767	10.2638	10.2163	10.0457
2	M2 UpD0-D3.6h IRF4_Induced NFkB_Signalling	SPG7	93.9394	11.9769	11.1384	11.4166	10.4103	10.9605	10.3674	10.5686	10.822	10.2729	10.5826	10.9859	10.5659	10.7775	10.8491	10.6059	10.5105	10.6482	10.5587	10.4297	10.5737	9.90041	10.0783	10.3947	9.95627
2	M2 UpD0-D3.6h IRF4_Induced NFkB_Signalling	SRSF5	93.9394	13.6061	13.5774	13.6232	12.796	12.9923	12.7505	13.0526	12.3943	12.5611	12.5543	13.0289	12.123	12.5575	12.3079	12.3309	12.508	12.5762	12.2406	12.5358	12.5156	11.9752	12.328	12.5096	11.9417
2	M2 UpD0-D3.6h IRF4_Induced NFkB_Signalling	TRABD2A	93.9394	8.67506	9.14592	8.78628	8.90891	8.66809	8.53039	9.5041	8.42433	8.30437	8.71667	8.45102	8.39525	8.65333	8.48278	8.39244	8.57483	8.58737	8.32299	8.47639	8.66474	8.47064	8.19865	8.45532	8.4144
2	M2 UpD0-D3.6h IRF4_Induced NFkB_Signalling	TRMT1	93.9394	11.0868	11.2037	11.1536	10.5101	10.5196	10.1711	11.527	10.4253	10.1777	10.3803	10.4884	10.2219	10.3951	10.2966	10.2206	10.2041	10.2643	9.96394	9.91427	10.2892	9.71101	9.20673	9.83031	9.316
2	M2 UpD0-D3.6h IRF4_Induced NFkB_Signalling	UNC119	93.9394	10.1416	10.4408	10.5077	10.0684	9.68373	9.57053	9.40357	9.36683	9.27082	9.67278	9.2448	9.34768	9.52391	9.51225	9.39786	9.62532	9.56994	9.28346	9.51102	9.53033	9.29479	9.35145	9.37206	9.27376
2	M2 UpD0-D3.6h IRF4_Induced NFkB_Signalling	UQCR10	93.9394	9.88269	10.1967	9.93462	9.91813	9.77136	9.55225	9.99326	9.51885	9.32226	9.95752	9.74423	9.26316	9.91523	9.82571	9.43709	9.96974	9.82129	9.6004	9.99431	9.70721	9.34594	9.47945	9.69477	9.30648
2	M2 UpD0-D3.6h IRF4_Induced NFkB_Signalling	USP36	93.9394	9.99946	10.0349	9.45705	9.52598	9.7376	9.28234	9.56324	9.21749	9.228	9.1245	9.40553	8.455	8.98256	9.14857	8.61849	9.10889	9.17012	8.71401	9.10728	9.3614	8.56197	8.95898	9.22944	8.60897
2	M2 UpD0-D3.6h IRF4_Induced NFkB_Signalling	WDFY2	93.9394	10.1488	9.90827	9.74969	9.14425	9.22107	9.09279	9.8653	9.17692	8.78105	8.92874	9.09592	8.85611	9.03983	9.29024	8.98183	8.942	9.22389	8.97081	8.80244	9.12261	8.83274	8.82166	8.93849	8.84448
2	M2 UpD0-D3.6h IRF4_Induced NFkB_Signalling	ZNF26	93.9394	9.28758	9.49837	9.3219	8.93081	9.03385	8.84917	9.37134	8.77173	8.75917	8.94094	9.08558	8.73835	8.674	8.83704	8.76385	8.92091	8.83894	8.75599	8.69955	8.89099	8.77308	8.88704	8.79447	8.72061
2	M2 UpD0-D3.6h IRF4_Induced NFkB_Signalling	LOC727820	92.9293	10.1922	11.2674	10.9118	8.75979	8.67273	8.60455	8.72031	8.65992	8.61648	8.51815	8.54521	8.61332	8.34739	8.44115	8.56172	8.19775	8.40079	8.35257	8.11395	8.37046	8.11946	8.25469	8.23911	8.19007
2	M2 UpD0-D3.6h IRF4_Induced NFkB_Signalling	RIPOR1	92.9293	12.2631	11.4922	11.9087	10.73	10.8286	10.629	11.0604	10.1686	9.87548	10.2539	10.4694	10.0252	10.3124	10.6373	10.1808	10.1324	10.2745	10.1432	10.0238	10.2622	9.39888	10.1698	9.85916	9.29063
2	M2 UpD0-D3.6h IRF4_Induced NFkB_Signalling	ATXN7L3B	91.9192	11.336	11.3593	10.9594	9.92501	10.372	9.9026	10.7285	10.5302	9.65964	10.1111	10.5531	9.99541	9.87954	10.1576	9.80923	9.80951	10.3335	9.80178	9.67446	10.1759	9.79833	9.81285	9.95117	9.76485
2	M2 UpD0-D3.6h IRF4_Induced NFkB_Signalling	CCDC92	91.9192	11.308	10.8452	10.9853	9.65829	9.38717	9.52867	10.7473	10.2454	9.80923	10.4147	10.3439	10.0303	10.3355	10.2497	9.76418	10.215	9.85175	9.74376	9.92319	9.69092	9.36018	10.0445	9.57241	9.23547
2	M2 UpD0-D3.6h IRF4_Induced NFkB_Signalling	CHST10	91.9192	8.54483	8.70517	8.41608	8.32075	8.59642	8.30142	9.16617	8.59888	8.39327	8.40313	8.45077	8.4275	8.34331	8.45367	8.41688	8.19579	8.2738	8.23019	8.18169	8.18345	8.18188	7.94889	8.12263	8.15874
2	M2 UpD0-D3.6h IRF4_Induced NFkB_Signalling	CTSZ	91.9192	11.806	11.3902	11.6973	11.4178	11.3845	11.0695	13.129	11.9823	11.7279	12.4649	11.5816	12.0047	11.9358	11.2267	11.7991	11.1626	10.7954	11.416	10.4877	10.6136	11.1151	10.4698	10.4105	10.7325
2	M2 UpD0-D3.6h IRF4_Induced NFkB_Signalling	CXCR5	91.9192	10.0505	10.4291	10.0171	9.23223	9.84657	9.67208	12.1149	10.2111	10.4008	9.941	9.92469	9.87886	9.29599	9.5612	9.50341	8.8763	9.3101	8.92754	8.68207	8.94623	8.5767	8.53882	8.683	8.24243
2	M2 UpD0-D3.6h IRF4_Induced NFkB_Signalling	DNAL4	91.9192	9.85327	10.425	9.92319	9.42308	9.73681	9.46965	10.0287	10.0546	9.53169	9.58935	9.72689	9.64058	9.14186	9.53795	9.42617	8.99295	9.34468	9.25534	8.86651	9.26403	8.89088	8.99104	9.28845	8.75579
2	M2 UpD0-D3.6h IRF4_Induced NFkB_Signalling	DYRK1B	91.9192	8.66046	8.53476	8.4132	8.07293	8.082	8.11553	8.33786	8.17336	8.19376	8.08138	8.2188	8.21878	8.01286	7.98326	8.08807	8.08733	8.08749	8.02411	8.00335	8.05849	8.05272	8.15209	7.97394	7.98053
2	M2 UpD0-D3.6h IRF4_Induced NFkB_Signalling	ECSIT	91.9192	8.41426	8.72669	8.57201	8.42424	8.49725	8.37829	10.0407	8.72444	8.59705	8.56788	8.53798	8.58286	8.3664	8.53264	8.48694	8.3186	8.36304	8.4454	8.24201	8.31423	8.35864	8.06404	8.18892	8.31819
2	M2 UpD0-D3.6h IRF4_Induced NFkB_Signalling	EPM2A	91.9192	8.95489	9.03983	8.64051	8.30658	8.62505	8.48527	8.76468	8.50734	8.46526	8.41904	8.51574	8.47022	8.34441	8.51405	8.31111	8.41122	8.424	8.44702	8.42882	8.28108	8.32195	8.27856	8.25103	8.35635
2	M2 UpD0-D3.6h IRF4_Induced NFkB_Signalling	ERI3	91.9192	9.80783	10.1998	9.96201	9.84515	9.86025	9.78222	11.51	10.0674	9.99775	9.89401	10.1163	9.8773	9.93175	9.89125	9.83209	9.86562	9.71674	9.64783	9.66655	9.86208	9.61633	9.39263	9.69255	9.43783
2	M2 UpD0-D3.6h IRF4_Induced NFkB_Signalling	FAAP20	91.9192	9.88576	10.0755	9.85287	9.73774	9.87367	9.57786	10.4919	10.0376	9.46796	9.62629	10.0336	9.52326	9.55933	10.1285	9.5916	9.61081	9.95341	9.49745	9.36312	9.92569	9.30208	9.39358	9.62544	9.08422
2	M2 UpD0-D3.6h IRF4_Induced NFkB_Signalling	FBXW4	91.9192	10.5162	10.3429	10.3779	9.62172	9.66976	9.41542	10.468	9.80178	9.392	9.74648	9.8558	9.54366	9.59823	9.68011	9.54625	9.44803	9.56051	9.37506	9.08642	9.51644	9.24692	9.4047	9.63425	9.22001
2	M2 UpD0-D3.6h IRF4_Induced NFkB_Signalling	IKBKB	91.9192	11.2796	10.9128	10.858	10.1787	10.1755	9.95274	10.4921	10.7325	10.2617	10.6106	10.6476	10.5826	10.3043	10.4239	10.2025	10.1705	10.2787	10.0501	9.90526	10.1338	9.85671	9.68908	10.1306	9.81242
2	M2 UpD0-D3.6h IRF4_Induced NFkB_Signalling	LCK	91.9192	8.55304	8.978	8.55289	8.41106	8.49624	8.3814	9.03285	8.71005	8.45334	8.48598	8.70208	8.68536	8.40748	8.47394	8.42658	8.26705	8.30105	8.27286	8.08935	8.25806	8.16691	8.25579	8.20961	8.10517
2	M2 UpD0-D3.6h IRF4_Induced NFkB_Signalling	LOC100130458	91.9192	10.0493	10.4771	10.1787	8.91815	9.37828	8.95005	9.54047	9.41668	9.07395	9.32461	9.45425	9.50365	9.17121	9.11951	9.07047	8.98311	9.04485	9.16767	8.67724	8.82677	8.6657	8.71628	8.5835	8.37765
2	M2 UpD0-D3.6h IRF4_Induced NFkB_Signalling	LOC652608	91.9192	8.74841	9.33618	9.2838	8.79601	8.81699	8.79138	8.88704	8.89053	8.87693	8.68191	8.78151	8.78266	8.62235	8.77391	8.63139	8.67483	8.70657	8.5447	8.58524	8.64642	8.51084	8.56993	8.73936	8.5307
2	M2 UpD0-D3.6h IRF4_Induced NFkB_Signalling	MARCKSL1	91.9192	10.5085	11.3023	10.5818	10.1856	10.4295	9.70594	10.8175	11.1588	10.3736	10.7352	11.2247	10.7392	10.5417	10.777	10.6505	10.1066	10.034	10.0062	9.29386	9.81714	9.32136	8.97471	9.24801	9.00724
2	M2 UpD0-D3.6h IRF4_Induced NFkB_Signalling	NOD1	91.9192	8.91777	9.05826	8.86196	8.38464	8.43922	8.40949	9.27304	8.51478	8.35008	8.53039	8.73394	8.53537	8.25979	8.46659	8.36544	8.2682	8.30043	8.41171	8.17482	8.28867	8.11382	8.14948	8.15868	8.09657
2	M2 UpD0-D3.6h IRF4_Induced NFkB_Signalling	NSFL1C	91.9192	10.436	10.8805	10.3325	9.46918	9.52065	9.20225	9.71896	9.75819	9.03451	9.66131	9.88494	9.14719	9.24453	9.48832	9.173	9.14405	9.29028	8.93216	8.96113	9.27091	8.75275	8.73307	9.402	8.77323
2	M2 UpD0-D3.6h IRF4_Induced NFkB_Signalling	P4HTM	91.9192	10.0234	9.5581	9.82731	9.21123	9.38392	9.39558	10.6545	9.82574	9.21751	9.33719	9.61393	9.45377	9.18015	9.20065	9.28069	9.01026	9.0558	8.8641	8.87519	8.89104	8.61205	8.90229	8.8654	8.69243
2	M2 UpD0-D3.6h IRF4_Induced NFkB_Signalling	PRAG1	91.9192	11.7467	11.2873	11.3464	11.0713	11.1567	11.0061	11.4006	11.1782	11.6029	10.9857	10.8271	11.1614	10.1731	10.418	10.8084	9.67136	10.0934	10.3688	8.83612	9.59285	9.26041	8.77572	9.09936	8.69889
2	M2 UpD0-D3.6h IRF4_Induced NFkB_Signalling	RPL18AP15	91.9192	8.42491	8.78	8.69529	8.20333	8.28978	8.19878	9.75519	8.28199	8.20029	8.40235	8.31435	8.26371	8.13265	8.16809	8.21431	8.16219	8.15314	8.10617	8.21377	8.11715	8.16323	8.17415	8.22463	8.15401
2	M2 UpD0-D3.6h IRF4_Induced NFkB_Signalling	RPSAP19	91.9192	13.9324	14.6247	14.3511	14.1926	14.1943	14.2641	14.2694	14.2101	14.3919	14.2553	14.2424	14.3904	13.9222	14.1776	14.0429	14.0043	14.0695	13.8835	14.0196	13.7923	13.8991	13.8072	13.5479	13.6029
2	M2 UpD0-D3.6h IRF4_Induced NFkB_Signalling	SCARNA21	91.9192	8.37497	9.04212	8.77905	8.06284	8.17481	8.11139	8.76106	8.11335	8.09965	8.04732	7.99747	8.09577	8.08452	8.09186	8.06926	8.0201	8.10806	8.1342	8.10322	8.0427	7.99086	8.0304	8.00553	8.13255
2	M2 UpD0-D3.6h IRF4_Induced NFkB_Signalling	SLC23A2	91.9192	9.22148	8.75725	8.9939	8.7309	8.93515	8.95623	10.163	9.08851	8.78151	8.75213	8.82224	8.95661	8.71861	8.48923	8.68126	8.60032	8.48811	8.51574	8.65139	8.45571	8.5049	8.5559	8.62177	8.51538
2	M2 UpD0-D3.6h IRF4_Induced NFkB_Signalling	SNX6	91.9192	10.4279	10.4	9.93192	9.45486	9.62651	9.25868	10.5192	9.87201	9.61751	9.84738	9.76388	9.69507	9.5552	9.63396	9.38763	9.37933	9.55006	9.35917	9.34245	9.22736	9.24306	9.1653	9.20595	9.30981
2	M2 UpD0-D3.6h IRF4_Induced NFkB_Signalling	SORBS3	91.9192	8.47633	8.77539	8.89941	8.76169	8.726	8.51357	9.76812	8.76257	8.81615	8.61183	8.81744	8.73733	8.23941	8.60174	8.57715	8.29663	8.41917	8.22055	7.92873	8.13131	8.00776	8.04868	8.10441	7.89132
2	M2 UpD0-D3.6h IRF4_Induced NFkB_Signalling	STK25	91.9192	10.5898	10.7508	10.3901	10.1815	10.3385	9.88008	11.0282	10.4307	9.90388	10.1826	10.4312	10.0083	10.2737	10.4677	10.0483	9.984	10.338	10.0314	9.83713	10.3282	9.68209	9.72974	10.2201	9.69285
2	M2 UpD0-D3.6h IRF4_Induced NFkB_Signalling	TIGD5	91.9192	10.2386	10.5371	10.6526	9.96426	10.0578	9.62634	10.4671	10.6383	10.008	10.2693	10.6854	10.154	10.2115	10.4509	10.0235	10.238	9.98849	10.0757	9.63492	9.87457	9.67597	9.35926	9.72225	9.56836
2	M2 UpD0-D3.6h IRF4_Induced NFkB_Signalling	TMEM185B	91.9192	9.7196	10.1319	9.83368	9.45996	9.64843	9.38194	9.95886	9.96523	9.91635	9.67398	9.80566	9.69805	9.43757	9.75071	9.33349	9.5988	9.67137	9.41244	9.3009	9.41875	9.38729	8.9721	9.27885	9.01525
2	M2 UpD0-D3.6h IRF4_Induced NFkB_Signalling	TOB2	91.9192	9.30402	8.89232	8.68911	8.90891	8.69161	8.67747	9.09279	9.00684	8.95763	8.67334	9.00366	8.78545	8.76009	8.6683	8.81432	8.67173	8.616	8.65748	8.38672	8.46356	8.52737	8.67014	8.25755	8.51766
2	M2 UpD0-D3.6h IRF4_Induced NFkB_Signalling	UBA52	91.9192	10.7017	10.8676	10.1576	9.50967	9.62228	9.22904	9.74665	10.1608	9.61189	10.0137	10.164	9.58293	9.93118	9.97687	9.63425	9.93638	9.61472	9.45831	9.46196	9.38522	9.12239	8.75528	9.28077	8.86736
2	M2 UpD0-D3.6h IRF4_Induced NFkB_Signalling	UBE2L3	91.9192	9.55564	10.1058	9.64358	9.04548	9.03313	9.04398	9.01445	9.38537	8.8952	9.27012	9.53058	8.97475	9.11359	9.31077	9.0317	9.0005	9.19311	8.71559	8.93214	9.13892	8.70863	8.73476	8.96465	8.61308
2	M2 UpD0-D3.6h IRF4_Induced NFkB_Signalling	VEGFB	91.9192	11.6098	11.7352	11.7003	11.2313	11.2419	11.1948	12.4396	11.3313	11.2884	11.0604	11.1766	11.2319	10.9131	11.1713	11.1282	10.8171	11.035	10.8365	10.7929	10.9669	10.4976	10.8391	10.9307	10.5667
2	M2 UpD0-D3.6h IRF4_Induced NFkB_Signalling	WDR73	91.9192	9.28968	8.85106	9.18042	8.65734	8.75298	8.50837	9.22244	8.91864	8.93461	8.76051	8.92763	8.6724	8.64868	8.7665	8.67557	8.58167	8.73602	8.53514	8.4157	8.43145	8.44083	8.31008	8.49591	8.26641
2	M2 UpD0-D3.6h IRF4_Induced NFkB_Signalling	ZNF32	91.9192	10.1285	10.7764	10.2873	9.09279	9.26274	9.00294	10.1823	9.18692	8.72987	9.13042	9.45245	9.10852	9.07617	9.23778	8.92645	8.76375	8.94498	8.67493	8.56385	9.03335	8.49304	8.57505	8.96112	8.65285
2	M2 UpD0-D3.6h IRF4_Induced NFkB_Signalling	ZXDC	91.9192	9.7357	9.71073	9.66456	8.88998	9.06546	8.8339	9.12272	9.57752	8.90966	9.17754	9.6889	8.98047	9.10951	9.2095	8.95323	8.89773	9.10045	8.77539	8.8127	8.97569	8.63237	8.82312	9.05185	8.74726
2	M2 UpD0-D3.6h IRF4_Induced NFkB_Signalling	ARSD	90.9091	9.6486	9.82026	9.12064	8.39911	8.60271	8.48491	8.80124	9.13713	8.56677	8.61183	9.27197	8.93205	8.64622	8.88601	8.87558	8.35165	8.60662	8.52944	8.05539	8.52726	8.23192	8.13742	8.1378	8.04589
2	M2 UpD0-D3.6h IRF4_Induced NFkB_Signalling	BCAS4	90.9091	11.9185	11.482	11.7274	10.9916	10.8834	11.0928	11.657	11.0618	10.8112	10.878	11.3304	11.1527	11.2231	11.2921	11.2558	10.8656	10.7588	10.8773	9.90508	10.1539	9.74836	9.45272	9.24351	9.07538
2	M2 UpD0-D3.6h IRF4_Induced NFkB_Signalling	CD82	90.9091	10.2602	9.80007	10.0601	9.54317	9.23193	9.09926	10.4973	9.71718	9.51835	9.99112	9.69695	9.67456	9.6154	9.56247	9.61399	9.34296	9.45079	9.41062	9.06332	9.20483	9.06447	8.98795	9.22724	9.00889
2	M2 UpD0-D3.6h IRF4_Induced NFkB_Signalling	CNPPD1	90.9091	10.3579	10.1876	9.97516	9.54679	9.85189	9.44061	9.91537	10.3047	9.79496	9.85491	10.3017	9.73034	9.46994	10.113	9.92829	9.35795	9.85931	9.50683	8.86532	9.39389	9.23064	8.52461	9.08112	8.70682
2	M2 UpD0-D3.6h IRF4_Induced NFkB_Signalling	HS.564874	90.9091	10.2512	9.54691	10.1254	8.97429	9.0673	8.72075	10.7317	9.49188	9.10635	9.62033	9.51526	9.58461	9.19709	9.26942	9.44231	8.77669	9.29284	9.08558	8.59383	8.80124	8.60081	8.40991	8.40582	8.5943
2	M2 UpD0-D3.6h IRF4_Induced NFkB_Signalling	KCTD13	90.9091	9.44101	9.40512	9.36288	8.96004	9.0999	8.81965	10.1005	9.392	9.06287	9.01547	9.31353	9.22275	8.89773	9.06099	8.88555	8.69752	9.01494	8.71868	8.55704	8.8275	8.73773	8.64464	9.05424	8.65411
2	M2 UpD0-D3.6h IRF4_Induced NFkB_Signalling	LOC651575	90.9091	9.13433	9.75721	9.50365	8.9127	8.89148	8.93282	9.68142	8.9861	8.94458	8.89951	8.95311	9.00376	8.84515	9.01481	9.10409	8.70198	8.82945	8.90103	8.53975	8.7752	8.85766	8.59699	8.51288	8.73673
2	M2 UpD0-D3.6h IRF4_Induced NFkB_Signalling	LPAR5	90.9091	11.8548	11.1284	11.5304	10.7731	10.4825	10.5901	11.2244	11.7746	11.244	11.3684	11.4178	11.75	10.8509	11.148	11.0015	10.4795	10.7143	11.0909	9.89022	10.527	10.4012	10.126	9.74736	9.91236
2	M2 UpD0-D3.6h IRF4_Induced NFkB_Signalling	MNT	90.9091	10.2272	10.2057	10.2888	9.45024	9.44381	9.56471	9.42686	9.19635	9.57053	8.98266	9.16224	8.82486	9.23391	9.48796	9.48265	9.10718	9.41052	9.31144	8.79736	9.47369	9.22462	9.1633	9.28557	9.00567
2	M2 UpD0-D3.6h IRF4_Induced NFkB_Signalling	MTMR14	90.9091	11.1803	11.2993	11.1306	10.9953	10.8774	10.6032	11.634	11.0284	10.9344	11.0981	11.1857	10.9914	10.8637	11.0569	10.972	10.5798	10.993	10.8263	10.3482	10.6913	10.3379	9.99408	10.3619	10.2022
2	M2 UpD0-D3.6h IRF4_Induced NFkB_Signalling	PCBP2	90.9091	11.0906	10.6028	10.9255	10.4532	10.562	10.5399	11.0713	10.7745	10.4603	10.5212	10.7646	10.6224	10.1897	10.6089	10.3616	10.1694	10.6319	10.2929	10.1846	10.4116	10.2812	10.1456	10.4452	10.3852
2	M2 UpD0-D3.6h IRF4_Induced NFkB_Signalling	PGS1	90.9091	10.6996	10.6717	10.5475	10.1751	10.0653	10.0421	10.7584	10.6341	10.0006	10.2884	10.7835	10.4585	10.5036	10.5048	10.3338	10.1174	10.118	10.118	9.80643	9.91944	9.7076	10.0115	9.97453	9.56436
2	M2 UpD0-D3.6h IRF4_Induced NFkB_Signalling	PRMT2	90.9091	9.47637	9.84215	9.40817	9.26802	9.16888	9.05023	9.5618	9.64	9.2394	9.2721	9.77764	9.43253	9.43981	9.61488	9.52394	9.19505	9.26392	9.2659	8.85612	9.10602	8.91391	8.79275	8.7481	8.74541
2	M2 UpD0-D3.6h IRF4_Induced NFkB_Signalling	TMCO4	90.9091	8.81494	8.62064	8.71358	8.23182	8.21891	8.18665	8.62866	8.18229	8.20893	8.22568	8.33651	8.49259	8.29156	8.32411	8.39346	8.13469	8.19119	8.19056	8.01823	8.20033	8.13144	8.23319	8.10441	8.23654
2	M2 UpD0-D3.6h IRF4_Induced NFkB_Signalling	TNIP1	90.9091	11.4416	11.9059	11.5327	10.8267	10.5892	10.6499	11.6491	11.0857	10.7767	10.792	11.3298	11.2985	10.6146	10.9912	11.0909	10.4953	10.6964	10.5093	10.1729	10.5093	10.4122	10.0377	10.5024	9.99503
2	M2 UpD0-D3.6h IRF4_Induced NFkB_Signalling	TPRN	90.9091	8.72006	8.93144	8.62793	8.5884	8.48032	8.57168	9.93584	9.00545	8.5347	8.55388	8.75862	8.60641	8.64262	8.59929	8.75492	8.54521	8.42585	8.46038	8.33125	8.54363	8.36279	8.46698	8.53844	8.3357
2	M2 UpD0-D3.6h IRF4_Induced NFkB_Signalling	U2AF1L4	90.9091	9.39835	9.34129	9.42854	9.05402	8.96786	8.92863	11.0519	9.06198	9.02401	9.27837	9.14299	9.20119	8.94336	8.99651	8.99861	8.82071	9.0075	8.94658	8.90483	8.93891	8.73948	8.76222	8.90477	8.78179
2	M2 UpD0-D3.6h IRF4_Induced NFkB_Signalling	UCP3	90.9091	8.60609	8.56172	8.43615	8.13471	8.0588	8.10077	8.63276	8.20996	8.35161	8.23652	8.20435	8.2477	8.16512	8.20767	8.21451	8.088	8.12479	8.097	8.13309	8.19025	8.12181	8.12594	8.1008	8.07312
2	M2 UpD0-D3.6h IRF4_Induced NFkB_Signalling	YAF2	90.9091	9.43656	9.27783	9.28912	8.37334	8.5692	8.58279	8.63426	8.40083	8.46677	8.47565	8.65285	8.4636	8.54799	8.66107	8.55481	8.5344	8.45747	8.57293	8.47832	8.45388	8.3924	8.46469	8.49304	8.37183
2	M2 UpD0-D3.6h IRF4_Induced NFkB_Signalling	YBEY	90.9091	9.28606	9.23261	9.61246	8.93	9.00839	8.96028	10.2484	9.19334	8.95959	8.90957	9.15813	8.97652	8.95428	9.06156	9.07867	8.81538	8.92463	8.83036	8.60563	8.83383	8.83192	8.55928	8.6169	8.66682
2	M2 UpD0-D3.6h IRF4_Induced NFkB_Signalling	ZC3H3	90.9091	10.6472	10.5954	10.5674	10.0245	10.4182	10.0129	11.1243	10.6882	10.2416	10.2288	10.5714	10.1257	10.1217	10.3808	10.2424	9.90136	10.1088	9.7939	9.76206	10.0839	9.68516	9.60326	9.93725	9.66115
2	M2 UpD0-D3.6h IRF4_Induced NFkB_Signalling	ZSCAN2	90.9091	9.85916	9.98557	9.84304	8.95774	8.9254	8.73673	9.49616	9.31388	9.25522	9.30102	9.22944	9.26502	9.13032	9.13259	9.16617	8.94239	8.97242	8.99162	8.74546	8.88086	8.69002	9.15099	8.66483	8.7949
2	M2 UpD0-D3.6h IRF4_Induced NFkB_Signalling	COLGALT1	89.899	11.0297	10.8009	10.9278	10.2477	10.6654	10.1466	10.3481	11.0436	10.4909	10.3887	10.8412	10.4071	10.218	10.7305	10.4501	10.0624	10.5875	10.2904	9.80968	10.2463	9.87457	9.1591	9.67699	9.66702
2	M2 UpD0-D3.6h IRF4_Induced NFkB_Signalling	COQ6	89.899	9.62546	9.60255	9.53379	9.22233	9.60326	9.22233	10.3409	9.78313	9.24058	9.56755	9.87166	9.51885	9.39726	9.55266	9.37411	9.21458	9.2435	9.24886	9.20304	9.26854	9.1823	9.03757	9.2079	8.97996
2	M2 UpD0-D3.6h IRF4_Induced NFkB_Signalling	FAM110A	89.899	9.6589	10.0142	9.46708	9.23702	9.12825	9.05056	10.2558	9.29485	8.90884	9.17862	9.26733	9.11797	9.15735	9.2074	8.9718	8.96574	9.14775	9.01742	8.98473	9.15223	8.96625	8.97773	9.21106	9.00323
2	M2 UpD0-D3.6h IRF4_Induced NFkB_Signalling	FAM167A	89.899	9.26894	9.44134	10.3535	8.66279	8.42289	8.81765	9.97583	9.2397	9.8441	9.5754	8.85342	9.82978	8.96877	8.32229	9.25118	8.54199	8.21875	8.81341	8.02095	8.03197	8.43358	8.10305	8.02295	8.23174
2	M2 UpD0-D3.6h IRF4_Induced NFkB_Signalling	GPN1	89.899	11.4885	11.6767	11.012	11.4409	11.8809	11.3558	12.025	11.892	11.2777	11.7488	12.0105	11.6174	11.4862	11.6119	11.4098	11.333	11.5683	11.1736	11.2427	11.3837	11.0744	10.9811	11.5659	11.147
2	M2 UpD0-D3.6h IRF4_Induced NFkB_Signalling	IFITM2	89.899	12.6015	12.9089	12.3832	12.382	12.8715	12.6044	13.9448	12.7276	12.4544	12.4636	12.6198	12.4297	11.9325	12.7308	12.1248	11.6405	12.8536	11.976	11.3382	12.7891	11.2512	11.9067	11.8858	10.6821
2	M2 UpD0-D3.6h IRF4_Induced NFkB_Signalling	IRF5	89.899	8.98562	10.1906	8.72916	8.94333	10.8455	8.92908	10.4456	11.9769	8.91497	9.30564	11.7575	8.98969	8.88958	11.179	9.0078	8.72201	10.5375	8.506	8.44097	10.1243	8.31647	8.46595	9.97738	8.16739
2	M2 UpD0-D3.6h IRF4_Induced NFkB_Signalling	LRPPRC	89.899	10.3967	10.3266	9.98384	10.1202	11.0629	10.208	11.2497	10.7118	10.0746	10.232	10.6002	10.2058	10.153	10.2982	10.143	10.033	10.3312	10.0812	9.82098	10.2715	9.873	9.28088	10.0344	9.67123
2	M2 UpD0-D3.6h IRF4_Induced NFkB_Signalling	NME6	89.899	9.64154	9.43599	9.43643	9.47706	9.7753	9.40079	11.1708	9.73795	9.36151	9.62452	9.65529	9.48091	9.50151	9.4547	9.25637	9.33693	9.50912	9.52368	9.2232	9.38774	9.30733	8.94094	9.32879	9.10481
2	M2 UpD0-D3.6h IRF4_Induced NFkB_Signalling	PELP1	89.899	10.6198	10.7188	10.514	10.4557	10.5453	10.0483	12.5454	10.743	10.349	10.135	10.5577	10.3934	10.0671	10.3594	10.3266	9.93357	10.4248	10.2501	9.88962	10.1119	9.99231	8.91609	9.84897	9.58996
2	M2 UpD0-D3.6h IRF4_Induced NFkB_Signalling	RPL14	89.899	11.7492	12.0135	12.3516	10.6155	11.6174	11.2385	12.9721	11.6728	11.1762	10.6604	11.5388	11.2625	10.2007	11.2606	10.9744	10.0951	11.1275	10.3492	10.4673	10.9539	10.4186	10.6503	10.7908	10.4173
2	M2 UpD0-D3.6h IRF4_Induced NFkB_Signalling	SYMPK	89.899	9.45116	9.33211	9.12428	9.11415	9.37787	9.01291	10.147	9.57542	9.13072	9.11415	9.36246	9.23511	8.95091	9.18021	9.03645	8.92593	9.22935	8.97921	8.89436	9.21791	8.92496	8.84068	9.08002	8.78232
2	M2 UpD0-D3.6h IRF4_Induced NFkB_Signalling	XPO6	89.899	11.8168	11.5746	11.556	10.8341	11.1119	10.6632	11.9871	11.3298	10.587	11.0174	10.9965	10.8831	10.9045	10.96	10.8745	10.5309	11.0495	10.8514	10.3977	10.8478	10.5073	10.0399	10.3775	10.0887
2	M2 UpD0-D3.6h IRF4_Induced NFkB_Signalling	ZFR	89.899	11.4166	11.4052	11.4105	10.9671	10.8659	11.05	11.9271	11.3571	11.2491	11.3824	11.0932	11.4544	11.2161	10.7458	11.1148	11.0624	10.6986	11.0104	10.8205	10.7138	10.7667	10.7625	10.792	10.8937
2	M2 UpD0-D3.6h IRF4_Induced NFkB_Signalling	ZFYVE19	89.899	9.63003	9.89832	9.78618	9.66101	9.59569	9.27226	9.93118	9.87938	9.48721	9.44871	9.76765	9.5608	9.28224	9.51758	9.45578	9.3455	9.3583	9.34525	9.23667	9.53002	9.21468	9.20187	9.4701	9.19922
2	M2 UpD0-D3.6h IRF4_Induced NFkB_Signalling	ACP5	88.8889	11.0217	10.5302	10.7988	9.32577	9.21282	9.60627	11.7579	11.3447	10.7179	10.7518	11.4217	11.3513	10.302	10.5682	10.9247	9.86465	10.4253	10.5964	9.26693	10.2157	9.69943	9.73258	9.70257	9.52562
2	M2 UpD0-D3.6h IRF4_Induced NFkB_Signalling	AHNAK	88.8889	10.7402	10.3754	10.702	9.86812	9.21369	9.62756	10.6808	10.2711	10.2998	10.5425	9.97558	10.2132	9.83175	9.90636	10.058	9.59936	9.75597	10.1185	9.39844	9.78927	10.2721	9.57162	9.87335	10.4033
2	M2 UpD0-D3.6h IRF4_Induced NFkB_Signalling	ARRDC2	88.8889	10.2839	10.8845	10.5471	8.53161	8.69223	8.61176	9.22747	8.85209	8.86469	8.51015	8.93164	8.7166	8.41491	8.90335	8.68934	8.43655	8.73629	8.75126	8.37029	8.53401	8.45148	8.34077	8.60897	8.3422
2	M2 UpD0-D3.6h IRF4_Induced NFkB_Signalling	BIN1	88.8889	12.5286	12.4193	12.4597	9.96805	10.2541	10.3521	10.4948	10.9177	10.7862	9.9902	10.9987	10.9407	9.41214	10.7425	10.825	9.09931	10.54	10.4255	8.8666	9.91173	9.55663	8.59748	9.36753	8.99493
2	M2 UpD0-D3.6h IRF4_Induced NFkB_Signalling	BLK	88.8889	13.0924	13.0414	12.7415	10.2144	10.1364	9.84562	10.5098	11.2306	10.3704	10.337	11.1068	11.0976	10.2779	10.8236	10.9869	9.82571	10.7222	10.6662	9.03188	10.2596	9.9654	9.39901	10.1024	9.83382
2	M2 UpD0-D3.6h IRF4_Induced NFkB_Signalling	BORCS6	88.8889	9.02838	9.10889	8.75926	8.55316	8.46164	8.4586	9.63425	8.74393	8.70674	8.63106	8.69875	8.83282	8.7071	8.90072	8.76249	8.46526	8.7575	8.63194	8.34467	8.52245	8.54308	8.44078	8.61899	8.65313
2	M2 UpD0-D3.6h IRF4_Induced NFkB_Signalling	BORCS7	88.8889	10.0081	10.1468	10.2159	9.25022	8.90274	9.22602	9.50738	9.3471	9.52495	9.87797	9.39721	9.75211	9.42693	9.23095	9.50873	9.29761	9.11475	9.42139	9.27247	9.17994	9.3362	9.29699	9.01134	9.47257
2	M2 UpD0-D3.6h IRF4_Induced NFkB_Signalling	C1orf35	88.8889	9.11404	9.25815	9.08877	9.313	9.45578	9.15741	9.83086	9.68332	8.98817	9.31205	9.60167	9.09031	9.15714	9.62989	9.15196	9.00829	9.33524	8.8913	8.93091	9.08764	8.90386	8.6865	9.04705	8.77926
2	M2 UpD0-D3.6h IRF4_Induced NFkB_Signalling	CARS2	88.8889	10.1902	9.79695	10.4598	9.17611	9.18012	9.3436	11.3817	9.56533	9.4367	9.39416	9.43615	9.61228	9.57421	9.3219	9.67367	9.55148	9.19764	9.48592	9.46819	8.98709	9.35003	9.02187	9.06305	9.32879
2	M2 UpD0-D3.6h IRF4_Induced NFkB_Signalling	CDK13	88.8889	10.5802	9.82113	10.3422	9.41258	9.3143	9.30225	10.1815	9.81505	10.035	9.7469	9.52592	9.93533	9.45679	9.60208	9.63288	9.51603	9.41348	9.62638	9.41655	9.35977	9.52988	9.40023	9.41405	9.49478
2	M2 UpD0-D3.6h IRF4_Induced NFkB_Signalling	CERS4	88.8889	8.71694	9.2075	8.8188	8.22707	8.47228	8.32093	8.31284	8.30049	8.25863	8.16964	8.36238	8.32039	8.1387	8.46892	8.30785	8.28011	8.34322	8.34779	8.22657	8.40296	8.2611	8.11987	8.15006	8.14005
2	M2 UpD0-D3.6h IRF4_Induced NFkB_Signalling	CRIP2	88.8889	10.3471	9.49498	10.1184	8.25225	7.98887	7.9973	9.50268	8.4556	8.38726	8.89518	8.59876	8.45824	8.17036	8.13244	8.05343	8.11256	7.94345	7.97812	7.91675	7.98524	7.84105	7.8721	7.97481	7.9611
2	M2 UpD0-D3.6h IRF4_Induced NFkB_Signalling	CRTC2	88.8889	9.87061	10.2693	10.2535	9.19896	9.35723	9.28546	10.0841	9.40444	9.7302	9.22691	9.40553	9.54585	8.90882	9.29182	9.49819	8.92091	9.28455	9.49482	8.83704	9.1562	9.18267	8.84151	9.03421	9.11987
2	M2 UpD0-D3.6h IRF4_Induced NFkB_Signalling	CYTH1	88.8889	12.2095	12.1814	12.0611	10.8386	11.1042	10.8088	11.927	11.7332	11.8169	11.6395	11.8028	11.7908	11.5474	11.476	11.6449	11.1937	11.3892	11.5605	10.749	11.2249	11.3313	10.9768	11.2821	11.2324
2	M2 UpD0-D3.6h IRF4_Induced NFkB_Signalling	DBNDD1	88.8889	10.1147	11.202	10.3895	8.35739	8.50417	8.4019	8.85137	8.76642	8.60743	8.54144	8.61878	8.6156	8.20704	8.34079	8.3618	8.15764	8.28584	8.42504	8.13682	8.26774	8.13734	8.23153	8.33503	8.22418
2	M2 UpD0-D3.6h IRF4_Induced NFkB_Signalling	DHX40	88.8889	8.9556	9.28989	8.90147	8.92523	9.07797	9.22497	8.9336	8.99773	9.10422	8.6444	8.77332	8.88377	8.6449	8.71821	8.79376	8.61849	8.72878	8.64262	8.75177	8.70674	8.73375	8.67166	8.66577	8.70549
2	M2 UpD0-D3.6h IRF4_Induced NFkB_Signalling	DOPEY2	88.8889	11.0907	10.653	11.1116	8.98741	9.33617	9.44989	9.41813	9.41159	9.45302	9.23528	9.3695	9.43105	9.16294	9.58607	9.66286	9.06825	9.62005	9.54413	8.77538	9.298	9.27286	8.94901	9.12645	9.05849
2	M2 UpD0-D3.6h IRF4_Induced NFkB_Signalling	DTX1	88.8889	9.42838	9.99066	9.21713	8.61825	9.21162	8.72355	9.48422	10.0769	9.23414	8.77926	9.86025	9.42975	8.70091	9.30981	9.43767	8.73569	9.18362	8.86993	8.63704	8.79182	8.50548	8.57709	8.8406	8.24857
2	M2 UpD0-D3.6h IRF4_Induced NFkB_Signalling	DUSP18	88.8889	10.0557	10.0431	9.90726	8.68391	8.54774	8.63258	9.3373	9.46131	9.06686	9.1088	9.398	9.39613	8.96175	9.16844	9.2356	8.81309	9.13784	9.20417	8.69346	9.09815	8.87848	8.59388	8.66308	8.5965
2	M2 UpD0-D3.6h IRF4_Induced NFkB_Signalling	EGLN2	88.8889	11.93	11.9691	11.6434	11.0373	11.2023	10.9803	12.3757	11.4616	11.1777	11.1111	11.5142	11.3124	11.0571	11.672	11.2588	10.9409	11.4721	11.2828	10.6167	11.334	10.7964	10.5315	10.9605	10.565
2	M2 UpD0-D3.6h IRF4_Induced NFkB_Signalling	EPHB6	88.8889	9.60167	9.82161	9.79848	8.09685	8.04575	8.04437	8.48811	8.8348	8.22956	8.48168	8.88714	8.76442	8.39879	8.78698	8.78535	8.28085	8.56624	8.47205	8.03521	8.30169	8.25029	7.94889	8.11379	8.04808
2	M2 UpD0-D3.6h IRF4_Induced NFkB_Signalling	FAM200A	88.8889	9.4738	8.95381	9.01704	8.46892	8.56269	8.6192	9.27896	8.95738	9.06591	8.70183	8.78485	8.95156	8.72583	8.76334	9.02594	8.6022	8.68977	9.10669	8.58789	8.54056	8.74366	8.53167	8.57811	8.62893
2	M2 UpD0-D3.6h IRF4_Induced NFkB_Signalling	FBRS	88.8889	10.7993	11.0778	10.7479	9.97844	10.0922	9.83397	11.679	10.7209	10.5092	10.0156	10.6675	10.319	9.73918	10.1799	10.2693	9.66115	10.0729	10.0554	9.43547	9.98594	9.81643	9.26777	9.83978	9.58559
2	M2 UpD0-D3.6h IRF4_Induced NFkB_Signalling	GRN	88.8889	10.2388	10.0095	10.1925	9.81907	10.0025	9.72121	11.1889	10.5411	10.0794	9.67883	10.3748	10.3452	9.99011	10.438	10.7998	10.0221	10.0457	10.6563	9.42928	9.80817	9.85845	9.39126	9.55455	9.63671
2	M2 UpD0-D3.6h IRF4_Induced NFkB_Signalling	GUCD1	88.8889	13.1731	13.5363	13.3655	11.8101	12.19	11.9871	12.5963	12.2697	11.9712	12.0029	12.419	12.0857	11.8751	12.5931	12.068	12.0259	12.5765	12.1221	11.5524	12.2892	11.6858	11.4091	11.9243	11.5581
2	M2 UpD0-D3.6h IRF4_Induced NFkB_Signalling	HS.192784	88.8889	8.55691	8.57897	8.45067	8.0584	8.08841	8.09086	8.08637	8.0359	8.06658	7.98984	8.20435	8.08263	8.155	8.12312	8.16032	8.07943	8.18588	8.05596	7.99106	7.9863	8.00066	8.11142	7.92481	8.01299
2	M2 UpD0-D3.6h IRF4_Induced NFkB_Signalling	HTT	88.8889	9.1834	8.77277	8.91142	8.41383	8.48498	8.37447	9.09925	9.0619	8.80124	8.685	9.0436	9.15921	8.83641	8.93994	9.19527	8.52196	8.63586	8.75765	8.33968	8.21829	8.35897	8.11413	8.28873	8.1253
2	M2 UpD0-D3.6h IRF4_Induced NFkB_Signalling	IL4R	88.8889	12.3225	13.666	13.1202	10.4266	11.1875	10.7635	12.76	11.255	11.0661	10.612	11.6143	11.1119	10.357	11.8405	11.7558	10.2281	11.8263	11.6091	9.60099	11.0396	10.1876	9.8571	10.1791	9.23064
2	M2 UpD0-D3.6h IRF4_Induced NFkB_Signalling	ITPK1	88.8889	9.20722	9.26587	9.35025	8.8404	8.7324	8.77043	8.96629	9.228	9.14134	9.1561	9.02413	9.42645	8.90434	9.24571	9.27805	8.80165	9.21269	8.95835	8.74307	9.03704	9.0809	8.45039	8.94316	8.81836
2	M2 UpD0-D3.6h IRF4_Induced NFkB_Signalling	JUP	88.8889	9.84502	11.2491	10.8838	8.65757	9.22547	9.15741	9.60874	9.34928	9.37546	8.64816	9.02151	9.23731	8.37886	8.99285	9.03133	8.34813	8.77629	8.96971	8.20111	8.5293	8.72184	8.13512	8.24951	8.3357
2	M2 UpD0-D3.6h IRF4_Induced NFkB_Signalling	LAPTM5	88.8889	13.534	13.8537	13.4429	12.4793	13.1183	12.7495	14.1598	13.1977	12.9434	12.8459	13.249	13.1937	12.7903	13.2997	13.27	12.7139	13.0414	13.116	11.7518	12.4088	12.3189	12.1221	11.9925	11.7232
2	M2 UpD0-D3.6h IRF4_Induced NFkB_Signalling	LOC100129828	88.8889	10.6014	10.2737	10.6731	9.99885	10.1463	10.0949	10.5674	10.171	10.0671	9.92576	10.1853	10.132	10.2277	10.3385	10.1974	10.038	10.1632	10.0346	9.67383	9.75673	9.49407	9.42464	9.53667	9.25293
2	M2 UpD0-D3.6h IRF4_Induced NFkB_Signalling	LOC642031	88.8889	10.1815	10.0222	10.2756	9.25626	9.50083	9.17164	11.4553	10.4131	10.0215	9.72071	9.92928	9.95599	9.60627	9.95305	9.91236	9.44206	9.84381	9.80283	9.21713	9.81512	9.51118	8.7365	9.42243	9.40371
2	M2 UpD0-D3.6h IRF4_Induced NFkB_Signalling	LOC642921	88.8889	9.14989	8.77879	8.97538	8.49765	8.57805	8.45458	9.35621	8.921	8.9947	8.68665	8.96452	8.87021	8.73032	8.86651	9.03044	8.62222	8.77407	8.86057	8.43489	8.67676	8.58587	8.14423	8.42338	8.23241
2	M2 UpD0-D3.6h IRF4_Induced NFkB_Signalling	LOC646916	88.8889	9.3975	9.41496	9.28455	8.51022	8.84866	8.74783	9.19437	9.11111	8.8679	8.6708	8.79182	8.80274	8.73264	8.85188	8.98227	8.40093	8.73629	8.79545	8.58576	8.72816	8.58038	8.75908	8.79261	8.51207
2	M2 UpD0-D3.6h IRF4_Induced NFkB_Signalling	LOC653853	88.8889	8.94866	9.31205	8.91739	8.32807	8.51015	8.72054	9.31758	8.91103	8.92149	8.65448	8.80417	8.82034	8.39263	8.69398	8.83923	8.43427	8.52261	8.62681	8.634	8.51985	8.49125	9.05142	8.64536	8.3647
2	M2 UpD0-D3.6h IRF4_Induced NFkB_Signalling	LPAR2	88.8889	9.31793	9.69256	9.70069	9.10829	8.96483	9.15974	9.50271	9.44673	9.25914	9.02078	9.31267	9.16379	8.94265	9.24248	9.11087	8.83861	9.17607	9.20002	8.77976	8.99529	8.89988	8.75205	8.87378	8.7543
2	M2 UpD0-D3.6h IRF4_Induced NFkB_Signalling	LY86	88.8889	12.539	12.3867	12.5822	9.07775	9.48449	10.0984	11.194	10.0346	10.094	9.27524	10.2508	10.5719	9.48796	10.2795	11.012	9.00253	10.1239	10.3664	8.33735	9.88536	9.34413	8.27522	8.8094	8.57581
2	M2 UpD0-D3.6h IRF4_Induced NFkB_Signalling	MADD	88.8889	9.07969	8.97858	8.99152	8.61728	8.77696	8.724	8.83483	8.92114	8.61787	8.69572	8.78339	8.79418	8.57653	8.77545	8.73423	8.65373	8.71427	8.61651	8.71416	8.70299	8.67274	8.47147	8.58292	8.68067
2	M2 UpD0-D3.6h IRF4_Induced NFkB_Signalling	MAP1S	88.8889	9.78145	9.54785	9.50993	9.13017	9.40499	9.16433	12.119	10.0136	9.76447	9.30387	9.80107	9.69384	9.09475	9.73146	9.44446	8.90072	9.4565	9.23414	8.71088	9.47243	9.18351	8.75445	9.2169	9.01458
2	M2 UpD0-D3.6h IRF4_Induced NFkB_Signalling	MAP3K14	88.8889	9.29428	9.5438	9.37188	8.96694	8.77872	8.78224	9.45955	8.71474	9.08593	9.32603	8.77966	8.96433	8.8298	8.94021	9.03485	8.51968	8.96571	8.67624	8.91031	8.96442	8.92033	8.73612	8.86389	8.77399
2	M2 UpD0-D3.6h IRF4_Induced NFkB_Signalling	MEPCE	88.8889	10.323	10.3912	10.146	9.39445	9.53819	9.31613	10.0445	10.4079	10.1065	9.88536	10.048	9.80767	9.34401	9.82129	9.77469	9.55462	9.58064	10.2447	9.36442	9.3218	9.3409	8.83182	9.4431	9.37776
2	M2 UpD0-D3.6h IRF4_Induced NFkB_Signalling	MTF1	88.8889	10.2126	10.234	10.0971	9.29502	9.73034	9.46103	9.76567	10.0193	10.0971	9.5625	9.7365	10.0142	9.41244	9.82832	9.89096	9.42939	9.87831	9.72356	9.2783	9.7316	9.79527	9.09137	9.54773	9.59838
2	M2 UpD0-D3.6h IRF4_Induced NFkB_Signalling	MTHFR	88.8889	10.0386	10.3179	10.0179	8.72477	9.01069	9.11305	9.26327	9.13747	9.32343	8.80488	9.13313	9.31942	8.53785	9.12504	9.24329	8.60781	9.04124	9.00473	8.56993	8.89232	8.8863	8.69074	8.94477	8.84207
2	M2 UpD0-D3.6h IRF4_Induced NFkB_Signalling	MTND5P10	88.8889	13.3077	13.5288	13.2721	12.9158	13.4792	13.2064	13.2508	13.666	13.3324	12.4203	13.1325	13.473	11.7141	12.7876	13.0164	11.5078	12.5416	12.6344	12.0916	12.5931	12.9053	12.6734	12.8866	12.5466
2	M2 UpD0-D3.6h IRF4_Induced NFkB_Signalling	NECAP2	88.8889	10.9815	11.2887	10.7759	10.1634	10.7167	10.2413	10.5983	10.5341	10.0948	10.1836	10.5075	10.2651	10.1005	10.5487	10.1872	10.0176	10.4493	10.2454	9.78347	10.2243	9.96922	9.54557	9.84644	9.71913
2	M2 UpD0-D3.6h IRF4_Induced NFkB_Signalling	NELFCD	88.8889	11.1246	11.5812	11.2198	10.6469	10.9413	10.6349	10.8092	10.9575	10.8002	10.4081	10.9819	10.7799	10.4781	10.8587	10.8632	10.5331	10.7535	10.7554	10.4992	10.5248	10.6364	9.80936	10.4412	10.4813
2	M2 UpD0-D3.6h IRF4_Induced NFkB_Signalling	NMT1	88.8889	10.5362	10.2734	9.91796	9.14372	9.42538	9.15523	10.1893	9.98435	9.45552	9.6696	9.84441	9.97787	9.85623	10.1174	9.8295	9.37738	9.69559	9.817	9.31179	9.6734	9.44776	9.15591	9.44602	9.37206
2	M2 UpD0-D3.6h IRF4_Induced NFkB_Signalling	NRM	88.8889	9.14304	9.76827	9.20615	8.98208	9.06287	8.8739	11.2223	9.19983	8.96092	8.58167	9.2011	8.97471	8.90695	9.45622	9.23437	8.74835	9.09197	8.83765	8.71156	8.86358	8.74593	8.48527	8.66603	8.51574
2	M2 UpD0-D3.6h IRF4_Induced NFkB_Signalling	NUDT14	88.8889	9.30771	9.23261	9.23036	9.07662	9.20133	9.12526	10.2859	9.3202	9.15921	8.88714	9.35514	9.13836	8.86837	9.49755	8.98468	8.82686	9.30242	8.99369	8.64962	8.91719	8.80895	8.81432	8.95235	8.75445
2	M2 UpD0-D3.6h IRF4_Induced NFkB_Signalling	NUDT16L1	88.8889	9.87886	10.1913	10.0491	9.15358	9.19414	8.87659	9.57643	9.8089	9.37989	9.58268	9.78296	9.59036	9.66702	9.9056	9.80643	9.56576	9.55195	9.62368	9.65493	9.53849	9.612	9.15316	9.46486	9.40434
2	M2 UpD0-D3.6h IRF4_Induced NFkB_Signalling	NXF1	88.8889	10.9002	10.9626	11.1383	10.2746	10.3277	10.3033	11.7347	10.9491	10.6894	10.2045	10.5666	10.5718	10.0916	10.5213	10.2817	9.96098	10.5269	10.2202	9.91613	10.5317	10.1042	9.64255	10.368	9.84343
2	M2 UpD0-D3.6h IRF4_Induced NFkB_Signalling	PACS1	88.8889	9.46555	9.48562	9.24093	8.54699	8.58869	8.53348	8.67686	8.78018	8.75484	8.63861	8.70682	8.65237	8.52076	8.78095	8.76009	8.43241	8.60878	8.6511	8.2272	8.57343	8.64785	8.20952	8.45093	8.39644
2	M2 UpD0-D3.6h IRF4_Induced NFkB_Signalling	PARN	88.8889	10.7983	10.8731	11.0529	10.6092	10.9128	10.803	11.2123	11.0098	10.5932	10.6936	11.1513	11.0791	10.9529	10.8871	10.9462	10.6784	10.7829	10.5317	10.5852	10.6512	10.3109	10.5609	10.7088	10.3947
2	M2 UpD0-D3.6h IRF4_Induced NFkB_Signalling	PGLS	88.8889	10.8286	10.8045	10.5024	10.1785	10.3286	10.1206	11.4772	10.7461	10.4138	10.1239	10.7458	10.4271	10.1044	10.9128	10.5309	9.97237	10.653	10.6954	9.42939	10.3991	10.0235	9.37492	9.91197	9.68762
2	M2 UpD0-D3.6h IRF4_Induced NFkB_Signalling	PHC1	88.8889	8.62852	9.12946	8.9478	8.41747	8.55767	8.5696	8.72909	8.46785	8.47709	8.36055	8.41314	8.61155	8.42934	8.62793	8.61935	8.23255	8.48595	8.50341	8.35465	8.32542	8.43071	8.27217	8.4478	8.34318
2	M2 UpD0-D3.6h IRF4_Induced NFkB_Signalling	PIK3CD	88.8889	10.8697	10.6497	10.5479	10.2065	10.9831	10.167	11.6205	10.5959	10.281	10.2428	10.7268	10.6115	10.1893	11.1177	10.8088	10.0232	10.9633	10.6769	9.41946	10.4541	10.1463	8.98382	9.73187	9.35859
2	M2 UpD0-D3.6h IRF4_Induced NFkB_Signalling	PRDM8	88.8889	10.8825	10.9257	10.7017	8.94835	8.5127	8.79199	9.40968	9.2095	9.52694	9.54366	9.18744	9.20247	8.95034	9.08337	9.17092	8.84207	9.03782	9.0685	8.68477	8.55487	8.82438	8.35619	8.64903	8.61467
2	M2 UpD0-D3.6h IRF4_Induced NFkB_Signalling	PSTPIP1	88.8889	9.35326	9.71045	9.55594	9.02586	8.89013	8.99645	9.50887	9.12139	8.85675	8.75177	9.4061	9.22351	8.84587	9.31687	9.36235	8.76148	9.13281	8.99714	8.6521	8.74961	8.55094	8.38502	8.59935	8.31186
2	M2 UpD0-D3.6h IRF4_Induced NFkB_Signalling	PWWP2B	88.8889	9.30488	9.64917	9.22312	8.16238	8.2814	8.18453	8.56773	8.32544	8.27636	8.10906	8.33844	8.30651	8.14777	8.26845	8.29507	8.11387	8.33308	8.28269	8.09363	8.22387	8.05035	8.10504	8.14061	8.02189
2	M2 UpD0-D3.6h IRF4_Induced NFkB_Signalling	RERE	88.8889	10.0621	9.48354	10.12	9.44135	9.67873	9.69791	10.1929	9.86422	9.75011	9.72782	9.72142	9.73437	9.28192	9.7455	9.74413	9.19462	9.5882	9.55284	8.92394	9.46946	9.28898	9.24693	9.44585	9.21845
2	M2 UpD0-D3.6h IRF4_Induced NFkB_Signalling	RETREG2	88.8889	9.3544	9.66686	9.31574	8.83904	9.05204	8.99494	9.35818	9.48102	9.14725	9.06888	9.32008	9.3455	8.92923	9.43996	9.0846	8.72863	8.9162	9.02032	8.73693	8.93954	8.93173	8.55094	8.93461	8.85335
2	M2 UpD0-D3.6h IRF4_Induced NFkB_Signalling	RHOF	88.8889	8.94361	9.45	8.95811	8.88564	9.11627	8.8094	11.4014	9.06949	8.88022	8.95042	8.96522	8.87004	8.65231	8.88601	8.75198	8.49157	8.69738	8.56736	8.55616	8.9133	8.42136	8.46469	8.39703	8.49271
2	M2 UpD0-D3.6h IRF4_Induced NFkB_Signalling	RIPK1	88.8889	9.3009	9.19111	9.01089	8.76395	8.78485	8.60408	10.4404	9.37738	9.1381	9.20709	9.36311	9.27207	9.08124	9.18159	9.0683	8.94717	8.91007	8.91262	8.83894	8.67225	8.6892	8.49861	8.79784	8.53654
2	M2 UpD0-D3.6h IRF4_Induced NFkB_Signalling	RNF216P1	88.8889	9.68332	9.22462	9.52853	9.20909	9.23633	9.50831	9.82174	9.93696	9.97065	9.50683	9.6358	9.78262	9.21045	9.29468	9.54514	9.0673	9.38862	9.35711	8.90018	9.43411	9.49616	8.96102	9.12054	9.46196
2	M2 UpD0-D3.6h IRF4_Induced NFkB_Signalling	RPL10AP3	88.8889	8.68492	9.4367	9.11197	8.78991	8.89351	8.82104	9.02248	8.80304	8.7071	8.49066	8.74359	8.66708	8.57299	8.64385	8.76667	8.47363	8.62003	8.44702	8.51671	8.69239	8.703	8.49141	8.6225	8.53214
2	M2 UpD0-D3.6h IRF4_Induced NFkB_Signalling	RPL31P10	88.8889	8.79412	9.86624	9.26878	8.61022	8.54278	8.69406	8.78779	8.66715	8.71183	8.41807	8.56749	8.6565	8.4348	8.48102	8.50541	8.37755	8.48272	8.32636	8.42513	8.48625	8.54768	8.32818	8.31596	8.2842
2	M2 UpD0-D3.6h IRF4_Induced NFkB_Signalling	RPS6KA1	88.8889	11.0784	11.432	10.9493	10.4993	10.831	10.2465	11.3077	11.0619	11.0093	11.105	10.9831	11.2374	10.7901	11.0159	10.8397	10.6229	10.8112	10.6543	10.4719	10.666	10.6534	9.99559	10.37	10.1864
2	M2 UpD0-D3.6h IRF4_Induced NFkB_Signalling	RUNX1	88.8889	9.51822	9.21543	9.40595	8.7629	8.7093	8.55157	9.84991	9.5263	9.65717	9.35133	9.40028	9.51513	9.30893	9.2079	9.43485	9.18437	8.73326	9.01715	8.89139	8.9851	8.89264	9.40371	9.25702	8.96403
2	M2 UpD0-D3.6h IRF4_Induced NFkB_Signalling	SCN4A	88.8889	8.34816	8.67408	8.59363	7.9542	8.08691	8.10307	8.06999	8.09609	7.99359	7.98646	7.99935	8.12256	7.95846	7.95496	7.94244	7.94874	7.95093	7.96983	7.99418	7.97976	8.03351	7.96607	7.91892	7.92327
2	M2 UpD0-D3.6h IRF4_Induced NFkB_Signalling	SLC2A1	88.8889	11.7286	12.2334	12.149	11.092	10.669	10.9272	11.424	11.7474	11.3109	11.6617	11.7765	11.5926	11.1545	11.5568	11.4536	11.1405	11.3985	11.4983	10.6949	11.0453	11.206	10.8478	10.6654	10.8003
2	M2 UpD0-D3.6h IRF4_Induced NFkB_Signalling	SLC9A8	88.8889	9.41509	9.59647	9.51696	8.54568	8.79912	8.77165	9.23213	8.7232	8.88966	8.64484	8.78292	8.75341	8.45201	8.73835	8.93144	8.7646	8.74635	9.02142	8.54699	8.69446	8.6669	8.34293	8.67246	8.5493
2	M2 UpD0-D3.6h IRF4_Induced NFkB_Signalling	SMARCAL1	88.8889	10.5412	10.921	10.5101	10.0011	10.0059	10.0905	10.1322	10.4184	9.85671	9.96426	10.3145	10.4829	10.0021	10.5029	10.3757	10.1248	10.2162	10.2787	9.87023	9.91489	10.0375	9.8551	9.78686	9.85981
2	M2 UpD0-D3.6h IRF4_Induced NFkB_Signalling	SMARCD1	88.8889	11.4345	11.5333	11.5464	11.0595	11.1816	11.2076	11.4674	11.6098	11.6251	11.3786	11.5934	11.6592	11.1662	11.553	11.3977	11.1421	11.3208	11.2651	10.9343	11.2201	11.1909	10.69	11.1475	11.0267
2	M2 UpD0-D3.6h IRF4_Induced NFkB_Signalling	SMARCE1	88.8889	11.2232	11.8574	11.7525	10.3662	10.6426	10.9815	11.0692	10.4905	10.6778	10.4753	10.7533	10.8927	10.6618	10.7272	11.0829	10.5629	10.5556	10.7447	10.1909	10.3967	10.4545	10.3128	10.3982	10.5653
2	M2 UpD0-D3.6h IRF4_Induced NFkB_Signalling	SPECC1L	88.8889	10.7889	10.6047	10.4832	9.9426	10.3462	10.0891	10.9898	10.6568	10.4964	10.3507	10.6968	10.5229	10.375	10.5666	10.4888	10.124	10.3258	10.2224	9.9882	10.2672	10.1031	9.90962	10.1229	9.96965
2	M2 UpD0-D3.6h IRF4_Induced NFkB_Signalling	ST14	88.8889	9.10728	8.65896	8.95178	8.16519	8.07128	8.18306	8.53875	8.82259	8.49344	8.46566	8.55088	8.57023	8.30448	8.45458	8.69175	8.24731	8.35632	8.46845	8.20485	8.073	8.44041	8.17513	8.04963	8.31275
2	M2 UpD0-D3.6h IRF4_Induced NFkB_Signalling	ST6GALNAC6	88.8889	9.38405	9.2626	9.2975	8.85707	8.96716	8.83975	9.74068	9.54483	9.17219	8.81782	9.31039	9.39564	8.88444	9.31788	9.19698	8.72893	9.23547	8.94639	8.63345	9.01937	8.66911	8.70332	8.75249	8.64173
2	M2 UpD0-D3.6h IRF4_Induced NFkB_Signalling	STAT5B	88.8889	9.28546	9.46461	9.34804	8.60186	8.79251	8.9691	9.54976	8.54011	8.72416	8.52374	8.65388	8.69551	8.66999	8.78257	8.97262	8.62954	8.6018	8.7758	8.52834	8.47068	8.62774	8.63153	8.61995	8.52357
2	M2 UpD0-D3.6h IRF4_Induced NFkB_Signalling	STAT6	88.8889	11.6487	11.6068	11.5255	10.3947	10.4846	10.3887	11.3504	10.681	10.4783	10.3471	10.4689	10.7104	10.0212	10.1853	10.4246	9.60226	10.1751	10.4312	9.13797	10.1586	9.88358	9.06806	9.74631	9.50365
2	M2 UpD0-D3.6h IRF4_Induced NFkB_Signalling	STK19	88.8889	9.7518	9.78161	9.7934	9.66561	9.75655	9.58673	10.1863	9.97342	9.78654	9.75028	9.97997	9.56639	9.49176	9.60075	9.44684	9.26265	9.51783	9.33614	9.27937	9.44037	9.12371	9.37748	9.37536	9.06954
2	M2 UpD0-D3.6h IRF4_Induced NFkB_Signalling	TBCK	88.8889	9.8564	9.83139	9.70594	9.47594	9.45728	9.56994	9.55628	9.28616	9.29231	9.15427	9.27044	9.5416	9.5272	9.61246	9.62452	9.31449	9.31942	9.41757	9.02633	9.24025	9.1926	9.10528	9.26611	9.25586
2	M2 UpD0-D3.6h IRF4_Induced NFkB_Signalling	TFEB	88.8889	8.81301	8.74205	8.58333	8.31691	8.31432	8.21593	10.3788	8.65849	8.39231	8.3018	8.51532	8.41533	8.22699	8.456	8.37204	8.20267	8.5022	8.44193	8.19607	8.29132	8.16888	8.06792	8.12771	8.14689
2	M2 UpD0-D3.6h IRF4_Induced NFkB_Signalling	TMBIM1	88.8889	10.8098	11.1108	10.6931	9.15264	8.95026	9.11415	9.49351	9.23754	9.31265	9.5134	9.28116	9.42379	9.01122	9.11016	9.34914	8.80793	9.13713	9.17495	9.00453	8.94498	9.13866	9.0019	9.01001	8.95081
2	M2 UpD0-D3.6h IRF4_Induced NFkB_Signalling	TMBIM6	88.8889	13.6291	13.7742	13.3225	12.7383	13.1343	13.1308	13.7374	13.3881	13.3984	13.2273	13.4253	13.4896	12.8803	13.129	13.1629	12.7156	13.0398	13.0226	12.6819	12.8981	12.9705	13.0143	13.129	12.9966
2	M2 UpD0-D3.6h IRF4_Induced NFkB_Signalling	TMC6	88.8889	11.5373	11.3625	11.5674	10.2563	10.4967	10.2835	13.1957	10.6273	10.4999	10.2445	10.5293	10.3496	9.88805	10.0549	10.5073	9.69238	10.2272	10.2859	9.68142	10.0871	9.91489	9.88929	9.94377	9.92429
2	M2 UpD0-D3.6h IRF4_Induced NFkB_Signalling	TMEM159	88.8889	8.95871	8.83282	8.82023	8.57573	8.6012	8.62196	9.15034	8.84669	8.98468	8.72113	8.7578	8.64605	8.55205	8.65915	8.63371	8.4159	8.76476	8.5737	8.41618	8.63949	8.45824	8.45549	8.38928	8.37075
2	M2 UpD0-D3.6h IRF4_Induced NFkB_Signalling	TNFRSF12A	88.8889	8.13907	8.02774	8.12067	8.00944	7.94502	8.04824	8.69642	8.41023	8.64051	8.40828	8.18514	8.27453	7.98675	8.04866	8.08867	7.95064	8.01071	8.07616	8.01938	7.9146	8.19933	8.00101	8.03344	8.07831
2	M2 UpD0-D3.6h IRF4_Induced NFkB_Signalling	TRIM56	88.8889	10.0692	9.8089	10.2025	8.93869	8.85914	9.08315	9.27129	9.27304	9.66914	9.28367	9.22044	9.65662	9.16518	9.18532	9.6008	9.21435	9.16593	9.43799	9.08134	8.95959	9.49682	9.17001	8.72373	9.14803
2	M2 UpD0-D3.6h IRF4_Induced NFkB_Signalling	WDFY4	88.8889	10.0666	10.143	9.90841	8.97461	9.2331	9.14862	9.92855	9.2475	9.14726	8.99912	9.22432	9.20116	8.98486	9.31953	9.62406	9.00447	9.13112	9.17082	8.66283	9.19962	8.7898	8.67056	8.85286	8.75597
2	M2 UpD0-D3.6h IRF4_Induced NFkB_Signalling	WNT10A	88.8889	8.47363	9.0041	8.42782	8.06898	8.00507	7.93594	8.1023	8.05216	8.07187	8.02772	7.97923	7.98441	7.9654	8.01604	7.98089	7.98447	8.03151	8.12536	7.94133	7.93213	7.90173	8.06488	8.01593	7.97234
2	M2 UpD0-D3.6h IRF4_Induced NFkB_Signalling	ZNF136	88.8889	9.63684	9.38194	9.62807	8.65522	8.99724	8.75102	8.93503	8.89529	8.96802	8.6511	8.97985	8.86961	8.74123	8.9412	8.99665	8.68971	8.69316	8.8115	8.55474	8.59663	8.59577	8.69577	8.66128	8.6327
2	M2 UpD0-D3.6h IRF4_Induced NFkB_Signalling	ZNF142	88.8889	11.2691	10.7893	11.08	10.218	10.8731	10.3643	11.0649	11.0579	10.8326	10.764	11.148	10.7883	10.7942	10.8725	10.8478	10.6863	10.7628	10.8387	10.4817	10.6782	10.5553	10.0705	10.5735	10.5051
2	M2 UpD0-D3.6h IRF4_Induced NFkB_Signalling	ZNF581	88.8889	12.3785	12.7432	12.3144	10.9358	11.367	10.9444	11.9342	11.4246	11.3948	10.8487	11.4503	11.1127	10.5739	10.8376	10.9431	10.5279	10.9969	10.7811	10.2031	10.9083	10.5941	10.4515	10.6798	10.4603
2	M2 UpD0-D3.6h IRF4_Induced NFkB_Signalling	ZNF746	88.8889	10.4412	10.2521	10.366	10.0413	10.1121	9.96797	10.2347	10.6604	10.4214	10.1821	10.7442	10.4466	10.0583	10.3492	10.1442	10.0393	10.3394	10.1023	9.77631	10.2115	9.85947	9.66355	10.0359	10.0523
2	M2 UpD0-D3.6h IRF4_Induced NFkB_Signalling	ZNF784	88.8889	8.98709	9.12869	8.88329	8.32285	8.38046	8.4593	8.62427	8.78856	8.56464	8.76232	8.75615	8.58317	8.48751	8.60087	8.56215	8.43334	8.44239	8.52396	8.47832	8.32134	8.52781	8.27029	8.40057	8.35084
2	M2 UpD0-D3.6h IRF4_Induced NFkB_Signalling	ZNFX1	88.8889	10.4568	10.1463	10.3794	9.61211	9.68157	9.70458	10.68	10.1063	10.5592	10.4071	10.2497	10.2089	9.81299	10.0282	10.0938	9.81512	10.0435	10.0969	8.98086	9.75736	9.70636	8.93187	9.57825	9.47218
2	M2 UpD0-D3.6h IRF4_Induced NFkB_Signalling	ARHGAP17	87.8788	11.35	11.0942	11.2913	9.9738	10.0243	9.94177	10.2629	10.0716	10.0898	10.0406	9.9578	10.3027	9.80053	9.77185	10.0602	9.47191	9.75661	9.92028	8.95383	9.61832	9.27463	8.81119	9.25657	8.78721
2	M2 UpD0-D3.6h IRF4_Induced NFkB_Signalling	C19orf25	87.8788	9.22389	9.73934	9.28957	8.54283	8.67073	8.35532	9.78834	8.91883	8.636	8.69138	9.05888	8.77026	8.74372	8.83783	8.60493	8.67969	8.86721	8.78698	8.60194	8.69899	8.72286	8.62962	8.67832	8.48534
2	M2 UpD0-D3.6h IRF4_Induced NFkB_Signalling	C1orf123	87.8788	10.3085	10.2454	10.1466	10.3205	10.1654	10.0887	11.5909	10.4399	9.93822	10.0964	10.669	10.1686	10.2436	10.359	10.3248	10.0887	10.2719	10.0513	9.80045	10.1248	9.87648	9.61839	10.0913	9.74265
2	M2 UpD0-D3.6h IRF4_Induced NFkB_Signalling	DLGAP4	87.8788	10.0115	9.57026	9.7365	8.61135	8.77912	8.55451	9.68501	9.27432	8.8931	9.06949	9.11512	9.05724	8.88768	9.01863	8.84855	8.68971	8.87188	8.70061	8.50063	9.03734	8.60277	8.47855	8.69168	8.68407
2	M2 UpD0-D3.6h IRF4_Induced NFkB_Signalling	POGK	87.8788	12.2764	12.0516	11.8126	11.2691	11.7249	11.1499	12.0105	12.193	11.6812	11.7881	12.153	11.7886	11.424	11.8159	11.4885	11.3902	11.7271	11.3343	10.8896	11.5568	11.3487	10.6664	11.3353	11.0985
2	M2 UpD0-D3.6h IRF4_Induced NFkB_Signalling	PPM1M	87.8788	11.3653	11.141	11.4718	11.4018	11.5225	11.3468	11.6222	11.7342	11.251	11.233	11.6012	11.2569	11.3074	11.6289	11.4372	10.92	11.3312	11.0453	10.4723	10.9712	10.5616	10.96	10.895	10.447
2	M2 UpD0-D3.6h IRF4_Induced NFkB_Signalling	SUMF1	87.8788	9.64955	9.83978	9.64212	8.68762	8.97093	8.81819	9.56728	9.39825	8.93576	9.10928	9.25656	9.29728	8.86336	8.99655	8.97385	8.8936	8.93292	8.97587	8.54158	8.95518	8.84215	8.62272	8.89608	8.75046
2	M2 UpD0-D3.6h IRF4_Induced NFkB_Signalling	TBC1D13	87.8788	9.50282	9.56235	9.40512	8.70885	8.84686	8.69053	9.50179	9.33058	8.86407	9.08981	9.16291	8.95196	8.8385	9.02133	8.91183	8.79363	9.04381	8.88657	8.72999	8.9378	8.81116	8.61618	8.84677	8.68927
2	M2 UpD0-D3.6h IRF4_Induced NFkB_Signalling	TMEM185A	87.8788	9.00341	9.29081	8.99724	8.66513	8.8783	8.56728	9.13383	9.45831	8.88775	8.97739	9.16068	9.05747	8.77134	8.97153	8.77298	8.61075	8.93503	8.61281	8.64376	8.78224	8.69489	8.66945	8.62383	8.65695
2	M2 UpD0-D3.6h IRF4_Induced NFkB_Signalling	ZMIZ2	87.8788	10.7403	10.8379	10.9108	9.46196	9.31701	9.20466	10.1457	9.86168	9.77421	9.40993	9.46723	9.95371	9.17959	9.16392	9.1972	9.12687	9.16205	9.39124	8.78595	9.12881	9.18508	8.8457	9.02594	9.13639
2	M2 UpD0-D3.6h IRF4_Induced NFkB_Signalling	ARFGAP2	86.8687	10.9056	10.8767	10.4901	9.82295	9.87886	9.83241	12.4167	10.0274	9.84657	10.2107	10.0105	10.1202	10.1236	9.97467	10.0713	9.92469	9.92267	9.94993	9.97005	9.97349	9.5612	9.59475	9.99793	9.82408
2	M2 UpD0-D3.6h IRF4_Induced NFkB_Signalling	AXIN1	86.8687	10.2579	10.8226	10.5341	9.5041	9.66546	9.27169	10.4543	9.77377	9.92829	9.65477	9.86925	9.48992	9.27934	9.56783	9.45093	9.24157	9.52645	9.33745	8.94945	9.38618	9.45845	8.88518	9.53795	9.38618
2	M2 UpD0-D3.6h IRF4_Induced NFkB_Signalling	GPR137	86.8687	11.206	11.8018	11.3544	10.768	10.8387	10.4325	11.0914	11.4776	10.8358	11.147	11.4166	11.0556	11.035	10.9811	10.8604	10.7811	10.7764	10.5345	10.5603	11.0026	10.384	10.3812	11.1012	10.5024
2	M2 UpD0-D3.6h IRF4_Induced NFkB_Signalling	HGS	86.8687	12.3936	12.1292	12.0212	10.9874	11.5794	11.0104	12.4949	12.4321	11.6969	12.1313	12.2816	11.7323	11.5295	11.6528	11.4327	11.2129	11.7448	11.1708	11.2118	11.7263	10.9924	11.1532	11.7056	11.0786
2	M2 UpD0-D3.6h IRF4_Induced NFkB_Signalling	LOC93622	86.8687	9.1899	9.42617	9.1823	8.78907	9.12104	8.56464	9.34619	9.19073	8.64506	8.88694	9.1094	8.76778	8.7992	8.9776	8.80889	8.94761	8.94908	8.73867	8.83064	8.88676	8.71221	8.58964	8.888	8.52771
2	M2 UpD0-D3.6h IRF4_Induced NFkB_Signalling	RNMT	86.8687	10.1711	10.4745	10.1931	9.92777	10.0346	9.85064	11.1234	9.94979	10.0618	9.58177	9.99981	9.80271	9.37578	9.89164	9.7234	9.313	9.67307	9.68011	9.32547	9.72356	9.73258	9.34039	9.91253	9.77213
2	M2 UpD0-D3.6h IRF4_Induced NFkB_Signalling	RRAGC	86.8687	10.571	10.7584	10.5968	10.1694	10.5257	10.1648	10.88	10.3683	10.5986	10.4116	10.5492	10.0684	10.1033	10.2879	10.0249	9.88929	10.1378	10.0152	9.76485	10.2879	9.72909	9.78932	10.3601	9.71486
2	M2 UpD0-D3.6h IRF4_Induced NFkB_Signalling	SQSTM1	86.8687	13.0263	12.9558	12.6804	12.2432	12.206	12.1707	13.5363	13.5984	12.9834	13.2997	13.3737	13.4253	12.6044	12.7319	12.4021	12.4682	12.6097	12.2385	12.3062	12.7367	12.1668	12.453	12.9287	12.5215
2	M2 UpD0-D3.6h IRF4_Induced NFkB_Signalling	TMEM115	86.8687	10.2546	10.3708	9.96664	9.52661	9.97439	9.73091	11.5365	10.4214	10.0718	10.359	10.3549	10.0207	9.94445	9.95841	9.57882	9.97299	9.88358	9.54133	9.9135	10.0193	9.60944	9.92796	10.1684	9.97645
2	M2 UpD0-D3.6h IRF4_Induced NFkB_Signalling	TNFSF12	86.8687	10.4837	10.9755	10.4767	8.72278	8.61022	8.58012	9.52215	8.56229	8.74046	8.60682	8.60403	8.73477	8.58263	8.75599	8.85177	8.50808	8.59062	9.15264	8.1178	8.70478	8.49842	8.23508	8.35185	8.21183
2	M2 UpD0-D3.6h IRF4_Induced NFkB_Signalling	AMOT	85.8586	9.16565	9.03397	8.99544	8.45083	8.28819	8.51395	8.47511	8.2248	8.26501	8.31419	8.31479	8.31904	8.17425	8.49952	8.34857	8.15024	8.48485	8.37889	8.25529	8.33147	8.24708	8.13104	8.27101	8.23368
2	M2 UpD0-D3.6h IRF4_Induced NFkB_Signalling	ARAP1	85.8586	9.41817	9.16951	9.24552	8.82897	8.77733	8.87225	9.54047	9.07834	8.79138	8.75615	8.88758	8.95439	8.68215	8.93797	8.99869	8.46621	9.03397	9.04932	8.57757	9.11239	8.91631	8.5746	8.8077	8.80488
2	M2 UpD0-D3.6h IRF4_Induced NFkB_Signalling	ARHGAP25	85.8586	12.4882	12.0083	12.2396	11.3948	11.5064	11.035	11.2674	10.9108	10.7005	10.7505	11.0772	11.2867	10.589	11.0356	11.6106	10.1676	11.1649	11.1696	9.95964	11.0232	10.664	10.5275	10.9575	10.5717
2	M2 UpD0-D3.6h IRF4_Induced NFkB_Signalling	ARHGEF3	85.8586	12.0169	11.6174	12.2464	10.2332	10.4316	10.6543	11.5926	11.4214	11.488	11.4943	11.3771	11.863	10.8972	11.1762	11.5863	10.4456	11.5086	11.6712	10.2053	11.251	11.1513	10.4598	11.1055	11.3593
2	M2 UpD0-D3.6h IRF4_Induced NFkB_Signalling	BEND4	85.8586	9.71127	9.4098	9.29923	8.84552	9.43295	8.95687	9.19136	9.05194	8.67585	8.56654	8.91739	8.75177	8.96327	9.22389	9.03624	9.03044	9.31289	9.28557	8.84504	9.16583	9.04221	8.78991	8.80182	8.70919
2	M2 UpD0-D3.6h IRF4_Induced NFkB_Signalling	CD22	85.8586	11.2143	11.499	10.814	8.87945	9.24941	8.96423	10.1916	9.09766	8.9896	8.51615	8.9861	8.87918	8.47152	9.12239	9.23177	8.4861	9.10861	9.06099	8.48114	9.15034	8.54768	8.44369	8.71667	8.40083
2	M2 UpD0-D3.6h IRF4_Induced NFkB_Signalling	CD72	85.8586	11.3121	11.7013	11.3343	9.32938	10.1561	9.80498	10.0767	9.7005	9.66285	8.91662	9.57291	9.46609	8.83089	9.82174	9.83031	8.76148	9.80222	9.73103	8.63479	9.82329	9.24839	8.45398	9.09668	8.61234
2	M2 UpD0-D3.6h IRF4_Induced NFkB_Signalling	CD74	85.8586	14.3539	14.259	14.3267	13.0128	13.235	12.9302	14.5171	13.5201	13.116	13.0762	13.3139	13.4749	12.7969	13.5224	13.3427	12.8715	13.5762	13.6008	12.4424	13.2679	13.2833	12.5505	12.9538	12.7585
2	M2 UpD0-D3.6h IRF4_Induced NFkB_Signalling	CDKN2D	85.8586	11.3618	10.9008	11.2848	10.4808	10.7305	10.6949	10.6944	9.88732	9.92629	10.0438	10.1159	10.2583	9.84005	10.8774	10.9159	9.72909	10.874	10.8242	9.24157	10.3783	9.88301	9.3062	9.86038	9.17742
2	M2 UpD0-D3.6h IRF4_Induced NFkB_Signalling	CLIP2	85.8586	8.96292	8.93859	8.87498	8.63748	8.60305	8.65756	8.93473	8.65927	8.67855	8.55717	8.54839	8.73131	8.46768	8.73893	8.73876	8.36073	8.81276	8.74228	8.49451	8.86979	8.64169	8.22345	8.51357	8.249
2	M2 UpD0-D3.6h IRF4_Induced NFkB_Signalling	CYLD	85.8586	10.0905	9.35795	9.54612	8.88064	9.14096	9.06132	9.27408	8.76708	8.69535	8.92002	9.12045	8.84652	9.15099	8.95568	9.01301	9.01646	8.8902	9.10557	8.7674	8.8835	8.90711	8.77827	8.93155	8.85715
2	M2 UpD0-D3.6h IRF4_Induced NFkB_Signalling	DDX58	85.8586	8.91192	8.87216	8.75476	8.30609	8.42524	8.28936	8.58396	8.35729	8.36145	8.32771	8.21265	8.38816	8.2273	8.48168	8.35967	8.17793	8.47919	8.35421	8.19398	8.52047	8.26695	8.20797	8.33185	8.23654
2	M2 UpD0-D3.6h IRF4_Induced NFkB_Signalling	DEPDC5	85.8586	9.36911	8.91963	9.42879	8.45684	8.62003	8.44617	8.97429	8.75158	8.53199	8.44813	8.54288	8.66975	8.4165	8.57805	8.69812	8.4025	8.60098	8.68754	8.45688	8.72654	8.39361	8.40859	8.4684	8.5765
2	M2 UpD0-D3.6h IRF4_Induced NFkB_Signalling	FYN	85.8586	10.0655	9.92429	9.5716	8.51073	8.42165	8.57129	9.31079	8.80993	8.76133	8.81164	8.64456	8.81665	8.31011	8.77843	8.97448	8.38554	8.94003	9.00494	8.19941	8.84935	8.60878	8.21624	8.55734	8.30727
2	M2 UpD0-D3.6h IRF4_Induced NFkB_Signalling	HLA-DOA	85.8586	12.6236	13.1308	12.5893	10.4635	10.777	10.3943	10.6125	10.2917	10.3327	9.98136	10.3411	10.2195	10.5117	10.946	11.2247	10.3103	11.1045	11.2146	9.64244	10.5653	10.4248	9.4898	9.99417	9.57189
2	M2 UpD0-D3.6h IRF4_Induced NFkB_Signalling	HS.369643	85.8586	9.16817	9.29514	8.85567	8.64385	8.67754	8.81157	9.489	8.78999	8.62648	8.49236	8.65956	8.5538	8.3856	8.56263	8.66145	8.51897	8.54949	8.71952	8.55474	8.74897	8.61014	8.56816	8.5407	8.44827
2	M2 UpD0-D3.6h IRF4_Induced NFkB_Signalling	KDM4B	85.8586	9.27907	9.66231	9.38392	8.40814	8.81538	8.48132	8.87896	8.62196	8.78072	8.39498	8.80255	8.57185	8.34496	8.64023	8.74359	8.50452	8.64161	8.50906	8.33919	8.57343	8.58652	8.37817	8.46434	8.31907
2	M2 UpD0-D3.6h IRF4_Induced NFkB_Signalling	LAT2	85.8586	11.6142	12.45	12.002	11.0942	11.342	11.2084	12.3422	11.1395	11.5602	10.8204	11.156	11.1705	10.6318	11.6045	11.454	10.8007	11.538	11.3281	10.6849	11.2755	10.897	10.4067	10.7204	10.5298
2	M2 UpD0-D3.6h IRF4_Induced NFkB_Signalling	LPGAT1	85.8586	9.41946	9.26381	9.38609	8.95215	8.83557	8.66951	8.7919	8.7965	8.6022	8.63012	8.725	8.54158	8.69916	8.8395	8.91834	8.72486	8.97878	8.90166	8.49225	8.83239	8.74468	8.49015	8.58964	8.6619
2	M2 UpD0-D3.6h IRF4_Induced NFkB_Signalling	NCKAP1L	85.8586	12.0647	12.0722	11.8323	11.5941	11.8867	11.7294	12.0916	11.5754	11.8552	11.5492	11.6084	11.5988	11.6012	11.9043	11.8449	11.5402	11.9769	11.8939	11.6251	11.7535	11.6205	11.5464	11.7434	11.51
2	M2 UpD0-D3.6h IRF4_Induced NFkB_Signalling	PCDH9	85.8586	8.82854	8.84669	8.67045	8.08777	8.19238	8.1217	8.42424	8.07304	8.13325	8.15831	8.13418	8.09986	8.16619	8.0066	8.07093	8.2245	8.16354	8.19841	8.23739	8.146	8.07969	8.10367	7.98955	8.04183
2	M2 UpD0-D3.6h IRF4_Induced NFkB_Signalling	PIP4K2A	85.8586	12.7173	12.4793	12.3366	11.4959	11.6575	11.512	11.8117	11.5018	11.4818	11.4403	11.6136	11.7984	11.6973	11.9059	11.9628	11.3481	11.8441	11.7315	10.9671	11.6487	11.6966	10.9287	11.3914	11.2453
2	M2 UpD0-D3.6h IRF4_Induced NFkB_Signalling	RAB4B	85.8586	9.61279	9.51043	9.43596	9.06354	8.90342	8.91555	10.1396	8.87488	8.75425	8.7112	9.02811	8.85339	8.81202	9.32251	9.10897	8.75576	9.32178	9.20219	8.53297	8.98463	8.8132	8.59058	8.70928	8.62028
2	M2 UpD0-D3.6h IRF4_Induced NFkB_Signalling	RBCK1	85.8586	10.2128	10.8194	10.4597	9.68989	9.77652	9.71582	10.9203	9.88488	9.76385	9.35665	9.7983	9.78033	9.32533	9.99437	9.82327	9.31446	9.93535	9.84536	9.28125	9.95192	9.55121	9.12133	9.60538	9.14866
2	M2 UpD0-D3.6h IRF4_Induced NFkB_Signalling	RBM38	85.8586	10.0745	10.4405	10.1922	9.18006	9.75633	9.58772	10.967	9.71473	10.4951	9.51448	9.54955	9.65444	9.44662	10.1006	9.82373	9.37869	10.1738	9.68105	9.47381	10.2026	9.61347	9.08949	9.87039	9.32173
2	M2 UpD0-D3.6h IRF4_Induced NFkB_Signalling	RNF44	85.8586	10.3736	10.0493	10.1729	9.2176	9.42645	9.16754	8.94044	8.86497	8.82626	8.82835	9.01438	8.77865	8.76554	9.08451	9.13639	8.94361	9.23414	9.0837	8.73693	9.06305	8.8127	8.76916	8.89394	8.82293
2	M2 UpD0-D3.6h IRF4_Induced NFkB_Signalling	RPL32	85.8586	9.21269	9.61534	9.37304	8.9864	8.86941	8.7507	9.37521	8.80658	8.82348	9.07186	8.92045	8.69891	8.89989	8.80626	8.86159	9.0058	8.84973	9.30869	9.3228	8.66881	8.94316	8.72278	8.56439	8.56947
2	M2 UpD0-D3.6h IRF4_Induced NFkB_Signalling	SLC25A6	85.8586	13.3863	13.3681	13.1052	12.4412	12.7127	12.4682	12.8379	12.8231	12.6486	12.4146	12.8935	12.6789	11.9209	12.2752	12.3785	12.0241	12.3649	12.2173	12.1521	12.4424	12.0743	12.6627	12.418	12.4346
2	M2 UpD0-D3.6h IRF4_Induced NFkB_Signalling	SLC29A3	85.8586	8.88127	8.81141	8.68569	8.87071	8.49371	8.56755	9.51659	9.24157	9.12954	9.90526	8.93994	9.42343	8.91279	8.5707	8.81109	8.4313	8.50286	8.53286	8.29754	8.57949	8.4733	8.48527	8.78707	8.60843
2	M2 UpD0-D3.6h IRF4_Induced NFkB_Signalling	DCTD	84.8485	11.1315	11.092	11.0852	10.7628	10.9231	10.6346	10.8313	11.1297	10.8201	10.9579	11.1108	10.9893	10.7053	10.5495	10.6632	10.4808	10.6672	10.544	10.2465	10.8582	10.5293	10.2477	10.7822	10.6512
2	M2 UpD0-D3.6h IRF4_Induced NFkB_Signalling	DSCR3	84.8485	10.6769	10.6747	10.4116	10.3327	10.3468	10.2349	11.6601	10.5566	10.6106	10.3468	10.3861	10.2309	10.0908	10.392	10.1686	10.1169	10.2715	10.1135	10.0896	10.3628	10.0322	10.2506	10.3597	10.2089
2	M2 UpD0-D3.6h IRF4_Induced NFkB_Signalling	ELMO2	84.8485	10.2661	10.2904	9.82786	9.97502	10.0023	9.81442	10.1986	10.3216	10.0567	10.1029	10.0483	10.2814	9.72867	9.95789	9.7717	9.47667	9.84427	9.77392	9.58746	10.0183	9.614	9.53795	10.1583	9.83843
2	M2 UpD0-D3.6h IRF4_Induced NFkB_Signalling	FAM160A2	84.8485	9.0156	9.15316	8.86569	8.5751	8.60174	8.42268	9.68972	8.77872	8.49141	8.72329	8.78856	8.55198	8.41017	8.6424	8.36082	8.33345	8.68807	8.38557	8.52409	8.78527	8.34739	8.41618	8.64576	8.40454
2	M2 UpD0-D3.6h IRF4_Induced NFkB_Signalling	FBXO31	84.8485	10.6505	10.9795	10.5121	9.74453	10.0688	9.8188	10.0721	10.3172	10.2067	9.99758	10.2416	9.9253	9.61246	9.7549	9.70104	9.57953	10.003	9.48018	9.68972	10.109	9.72867	9.61839	10.0621	9.7514
2	M2 UpD0-D3.6h IRF4_Induced NFkB_Signalling	GFOD1	84.8485	9.93576	9.59495	9.63843	9.32575	9.53244	9.22664	9.68417	9.66509	9.70921	9.82168	9.56382	9.59432	9.15949	9.25346	9.06362	9.00729	9.09956	8.95601	8.78498	9.36838	9.06457	8.94161	9.51467	9.1155
2	M2 UpD0-D3.6h IRF4_Induced NFkB_Signalling	KHNYN	84.8485	10.431	10.0207	10.0725	8.94164	9.25574	8.89264	10.1916	9.5226	9.47069	9.23343	9.28818	9.28417	8.88127	9.20096	8.96581	8.74905	9.3009	8.73491	8.72595	9.17978	8.83904	9.05386	9.20315	8.5168
2	M2 UpD0-D3.6h IRF4_Induced NFkB_Signalling	KMT5B	84.8485	9.60425	10.3838	10.0314	8.97493	9.06056	9.01228	9.08278	9.42939	9.2003	9.06709	9.50033	9.1562	8.95623	8.94458	8.90216	8.80618	9.04485	8.8631	8.78753	9.01937	8.95598	8.72863	9.12515	8.89736
2	M2 UpD0-D3.6h IRF4_Induced NFkB_Signalling	NSUN5	84.8485	9.92358	10.2305	9.92333	9.39253	9.62974	9.12706	11.7215	9.765	9.44954	9.34566	9.80251	9.33172	9.2978	9.54416	9.26918	9.12513	9.38855	9.18444	9.25324	9.45183	9.17095	8.93547	9.40661	9.21981
2	M2 UpD0-D3.6h IRF4_Induced NFkB_Signalling	PRKAB1	84.8485	10.6106	10.4298	10.004	9.67526	9.82911	9.45012	10.7859	9.91863	9.81055	9.81442	9.96034	9.84091	9.62087	9.86451	9.6426	9.46319	9.84765	9.54174	9.65595	9.84586	9.56471	9.4431	9.72308	9.33304
2	M2 UpD0-D3.6h IRF4_Induced NFkB_Signalling	RAI1	84.8485	9.25274	9.71335	9.38768	8.69674	8.76096	8.67885	8.87862	8.73806	8.91177	8.8238	8.71933	8.69006	8.61591	8.73015	8.70289	8.53456	8.79961	8.57804	8.5235	8.78467	8.57823	8.63141	8.93205	8.52038
2	M2 UpD0-D3.6h IRF4_Induced NFkB_Signalling	REX1BD	84.8485	10.8155	11.0551	11.0909	10.9061	10.8226	10.3947	11.1583	10.9377	10.4095	10.5354	10.9717	10.4152	10.4208	10.7204	10.5058	10.2505	10.7161	10.3856	10.1484	10.77	10.5126	10.1193	10.777	10.3638
2	M2 UpD0-D3.6h IRF4_Induced NFkB_Signalling	RNF220	84.8485	11.1719	11.5801	11.0464	10.1257	10.1654	9.85127	11.5667	10.3507	10.3724	10.3704	10.4497	10.2636	9.89886	10.2107	9.91551	9.84601	10.113	9.93175	10.0033	10.1628	9.89573	9.97516	10.3866	10.0421
2	M2 UpD0-D3.6h IRF4_Induced NFkB_Signalling	SLC12A9	84.8485	11.6338	11.1882	11.5553	10.7518	10.5117	10.5341	11.0356	10.7811	10.5483	10.8817	10.8402	10.9605	10.6489	11.0715	11.059	10.2529	11.0835	11.1573	10.3449	11.1395	10.7565	10.2454	10.8083	10.4307
2	M2 UpD0-D3.6h IRF4_Induced NFkB_Signalling	URGCP	84.8485	9.92149	9.87672	9.49175	8.84017	9.18472	8.9987	9.65742	9.86405	9.51633	9.26428	9.80479	9.36539	8.98341	9.42983	9.06979	8.96207	9.26341	8.92779	8.85886	9.13557	8.92759	8.67764	9.107	8.88352
2	M2 UpD0-D3.6h IRF4_Induced NFkB_Signalling	ZC3H12A	84.8485	9.32909	9.89303	9.59347	8.6694	8.86177	8.73118	9.7717	8.97141	9.02765	8.89816	8.94972	8.8907	8.65921	8.71773	8.75341	8.68215	8.78675	8.61095	8.44528	8.84714	8.62025	8.56371	8.80686	8.54211
2	M2 UpD0-D3.6h IRF4_Induced NFkB_Signalling	BBS1	83.8384	9.06481	9.12295	8.98439	8.42155	8.63645	8.44792	9.03078	8.99142	8.61371	8.72184	9.02463	8.83327	8.64218	8.63324	8.69191	8.45191	8.50087	8.53823	8.32219	8.58317	8.43369	8.59756	8.72416	8.44321
2	M2 UpD0-D3.6h IRF4_Induced NFkB_Signalling	CLUHP3	83.8384	9.45152	9.71204	9.66146	8.6169	8.79706	8.67927	9.63501	8.67676	8.64262	8.37193	8.67676	8.72408	8.24906	8.50398	8.64732	8.33577	8.79026	8.60271	8.44414	8.65969	8.71305	8.44189	8.5355	8.404
2	M2 UpD0-D3.6h IRF4_Induced NFkB_Signalling	CNFN	83.8384	10.104	10.0636	9.74376	8.226	8.37401	8.34637	9.398	8.30803	8.48581	8.44414	8.43381	8.35635	8.25733	8.37428	8.30922	8.43708	8.39249	8.31313	8.2829	8.56167	8.34956	8.24995	8.46586	8.20272
2	M2 UpD0-D3.6h IRF4_Induced NFkB_Signalling	FCER2	83.8384	11.9917	13.0106	12.229	8.3458	9.47139	8.78302	11.1532	9.22873	8.78938	8.3551	8.84476	8.86238	8.04467	8.18763	8.08491	7.96622	8.21544	8.09052	8.04001	9.0216	8.37007	8.01531	9.04892	8.79861
2	M2 UpD0-D3.6h IRF4_Induced NFkB_Signalling	QTRT2	83.8384	10.1546	9.85276	9.96728	9.74068	9.79197	9.64926	9.92629	9.92319	10.1974	10.019	9.93759	10.0771	9.93175	9.71295	9.90504	9.98503	9.7781	9.79432	9.6397	9.48821	9.84304	9.27501	9.38763	9.58148
2	M2 UpD0-D3.6h IRF4_Induced NFkB_Signalling	ZNF687	83.8384	8.76623	8.68378	8.40528	8.23412	8.18237	8.13949	8.23097	8.39809	8.21476	8.11642	8.25499	8.32527	8.12825	8.16438	8.23596	8.12007	8.29571	8.05415	8.14731	8.12332	8.22431	8.14948	8.15403	8.14251
2	M2 UpD0-D3.6h IRF4_Induced NFkB_Signalling	BAP1	82.8283	9.96612	10.1042	9.55476	9.75991	9.66578	9.43519	11.993	10.1033	9.32909	9.60944	10.0925	9.62128	9.50756	9.74265	9.43212	9.26765	9.67919	9.34135	9.57517	9.71187	9.48091	9.44034	9.70874	9.47218
2	M2 UpD0-D3.6h IRF4_Induced NFkB_Signalling	BTK	82.8283	13.0361	13.1791	13.3059	12.3225	12.2841	12.4832	12.5338	11.9676	12.3225	12.1626	12.1581	12.3355	12.4239	12.339	12.5976	12.0925	12.2474	12.3649	11.8306	12.1697	12.1051	11.8433	12.3912	12.2487
2	M2 UpD0-D3.6h IRF4_Induced NFkB_Signalling	EIF3L	82.8283	13.5579	13.6291	13.3881	12.9854	13.3614	12.9912	13.4919	13.4919	13.0504	13.2508	13.5778	13.1871	12.6516	13.3881	13.138	12.7939	13.1808	12.9854	12.8731	13.1482	12.7114	13.1248	13.1566	12.963
2	M2 UpD0-D3.6h IRF4_Induced NFkB_Signalling	LINC00623	82.8283	10.7181	10.7599	10.5126	9.6789	9.57517	9.31179	9.9854	9.53321	9.53638	9.55648	9.6327	9.14683	9.14504	9.28088	9.11532	8.82249	9.33796	8.95835	8.6155	9.29899	8.68597	9.11776	9.46894	8.78151
2	M2 UpD0-D3.6h IRF4_Induced NFkB_Signalling	MPEG1	82.8283	9.10328	9.00101	8.71612	8.20631	8.24652	8.1754	8.82879	8.18757	8.15326	8.21761	8.16633	8.1805	8.21627	8.19908	8.16051	8.1436	8.24359	8.26389	8.1891	8.15791	8.16598	8.0827	8.24118	8.10286
2	M2 UpD0-D3.6h IRF4_Induced NFkB_Signalling	PCF11	82.8283	10.8901	10.3765	10.6281	9.44366	9.60596	9.48113	10.1481	9.20909	9.34491	9.31179	9.31449	9.28946	9.67569	9.4854	9.6827	9.54571	9.50059	9.62926	9.49075	9.37614	9.40499	9.47679	9.54439	9.45425
2	M2 UpD0-D3.6h IRF4_Induced NFkB_Signalling	TARDBP	82.8283	9.61908	9.64458	9.76827	9.00633	9.49561	9.40512	9.35145	9.01863	9.03782	9.0721	9.10281	8.96839	9.32452	9.01334	9.12404	9.41378	9.11627	9.25246	9.24429	9.06156	9.15395	9.19361	9.22926	8.94291
2	M2 UpD0-D3.6h IRF4_Induced NFkB_Signalling	FAM193A	81.8182	9.91197	9.6144	9.65829	8.90806	9.04413	9.1627	9.3311	9.53156	9.52974	9.25259	9.27783	9.29703	9.04371	9.40499	9.05547	9.03433	9.26147	9.06056	8.92199	9.20696	9.11305	8.90026	9.19733	9.12515
2	M2 UpD0-D3.6h IRF4_Induced NFkB_Signalling	POLDIP3	81.8182	11.3647	11.9235	11.1816	10.1535	10.615	10.2956	11.3997	11.1875	11.0614	10.7194	11.0132	11.0154	10.4553	11.0181	10.7599	10.2982	10.8755	10.583	10.1945	10.8276	10.453	10.1416	10.7066	10.6795
2	M2 UpD0-D3.6h IRF4_Induced NFkB_Signalling	ACTR1B	80.8081	10.6271	11.038	10.6275	10.7213	10.8436	10.4568	11.9945	10.6863	10.5501	10.3895	10.5852	10.4386	10.2919	10.353	10.3406	9.91318	10.2857	10.0605	9.88434	10.5337	10.0152	10.2193	10.6522	10.1123
2	M2 UpD0-D3.6h IRF4_Induced NFkB_Signalling	ERCC1	80.8081	10.4267	10.6995	10.5014	10.4024	10.2607	10.2961	10.72	10.6757	10.5259	10.505	10.8099	10.6543	10.2991	10.432	10.5817	10.0527	10.2633	10.1937	10.0243	10.5269	10.2303	10.4356	10.7097	10.381
2	M2 UpD0-D3.6h IRF4_Induced NFkB_Signalling	LOC651738	80.8081	8.85603	8.81309	8.65765	8.22321	8.40677	8.36433	8.34985	8.38903	8.16474	8.24995	8.15483	8.31076	8.34671	8.31416	8.24469	8.20943	8.46025	8.41976	8.20556	8.31829	8.23934	8.26942	8.33118	8.16032
2	M2 UpD0-D3.6h IRF4_Induced NFkB_Signalling	MICU1	80.8081	9.34234	9.63655	9.15149	9.18705	9.35248	9.24184	9.62958	9.42254	9.15599	9.0714	9.29777	9.16102	9.02806	9.18461	9.08265	8.91806	8.96059	8.91729	8.93453	9.22614	9.01272	9.2232	9.29502	9.06034
2	M2 UpD0-D3.6h IRF4_Induced NFkB_Signalling	SLC29A2	80.8081	8.96931	9.04847	8.9957	8.93434	9.1707	8.85281	9.00684	8.8163	8.74393	8.72006	8.73272	8.86028	8.64105	8.93205	8.76615	8.64285	8.755	8.72278	8.56127	8.53531	8.38067	8.52087	8.39804	8.12565
2	M2 UpD0-D3.6h IRF4_Induced NFkB_Signalling	WIPI2	80.8081	9.60475	9.74753	9.2499	8.9468	8.59536	8.94477	9.70524	9.63342	9.77853	9.48393	9.5134	9.62048	8.94761	9.32522	9.1834	8.88064	9.05944	8.9254	8.57321	9.0265	9.00526	8.69857	9.14071	8.98863
2	M2 UpD0-D3.6h IRF4_Induced NFkB_Signalling	C6orf48	79.798	11.2151	11.2284	11.2556	10.5062	10.8758	10.6217	11.2922	10.6975	10.4383	10.5605	10.7417	10.5207	10.364	10.4676	10.3537	10.2744	10.4766	10.3585	10.1969	10.1789	10.0986	10.4171	10.038	9.89426
2	M2 UpD0-D3.6h IRF4_Induced NFkB_Signalling	DIEXF	79.798	9.21569	9.06156	9.22789	8.43718	8.59584	8.50522	8.47876	8.44321	8.58703	8.49236	8.59677	8.44106	8.49693	8.57208	8.41601	8.56178	8.32308	8.48278	8.44295	8.56544	8.38596	8.3065	8.46278	8.50975
2	M2 UpD0-D3.6h IRF4_Induced NFkB_Signalling	DNAJC19	79.798	8.94021	9.42576	9.31216	8.99173	8.9736	8.97579	9.24705	8.92314	8.60682	9.00633	8.86187	8.96327	8.93758	8.75317	9.01101	8.94558	8.76632	8.78151	8.83147	8.62272	8.67208	8.59479	8.61618	8.71096
2	M2 UpD0-D3.6h IRF4_Induced NFkB_Signalling	EIF2D	79.798	10.5531	11.119	10.4075	10.9661	11.4272	10.6931	12.9268	10.9205	10.7371	10.6248	10.862	10.4617	10.1648	10.2488	10.0011	9.93079	10.2599	9.84413	10.1023	10.4813	9.9454	10.2617	10.4897	10.0873
2	M2 UpD0-D3.6h IRF4_Induced NFkB_Signalling	FAM206A	79.798	9.09992	8.95693	8.88622	9.27183	9.13048	8.93371	10.1484	9.42716	9.05129	9.30521	9.22341	9.09028	8.87141	8.87544	8.72984	8.76758	8.85615	8.68737	8.93717	8.88263	8.88633	8.80158	9.01896	8.99231
2	M2 UpD0-D3.6h IRF4_Induced NFkB_Signalling	HEATR6	79.798	10.1156	9.85276	9.87184	9.61519	9.85605	9.31742	9.58491	9.78686	9.20673	9.80566	9.87886	9.54454	9.71709	9.54224	9.37521	9.3804	9.37492	9.06355	9.18857	9.09633	8.78664	8.94094	8.94094	8.61975
2	M2 UpD0-D3.6h IRF4_Induced NFkB_Signalling	HS.91389	79.798	12.0083	12.4471	12.1626	10.3149	10.3724	10.1744	10.3674	10.1862	9.94814	10.4613	10.4927	10.2723	10.4723	10.1636	10.3335	10.267	9.70949	9.95771	9.35753	9.17656	9.20647	9.04284	8.90575	8.78318
2	M2 UpD0-D3.6h IRF4_Induced NFkB_Signalling	JADE2	79.798	11.7728	11.9667	11.5588	9.51019	9.68777	9.24552	9.65493	9.69005	9.28077	9.35211	9.71324	9.48562	9.25179	9.53907	9.33704	8.93815	9.07151	9.04724	8.5744	8.79848	8.64059	8.36906	8.68126	8.37334
2	M2 UpD0-D3.6h IRF4_Induced NFkB_Signalling	LINC00997	79.798	8.85246	8.33557	8.50204	8.28247	8.31269	8.47182	9.49212	8.91926	8.79353	8.48266	9.0388	8.79944	8.49092	8.72176	8.85246	8.44317	8.35219	8.48637	8.39846	8.27943	8.31599	8.3924	8.12307	8.15811
2	M2 UpD0-D3.6h IRF4_Induced NFkB_Signalling	LOC648405	79.798	9.73007	10.7695	10.5011	9.29195	9.45845	9.07517	9.36924	9.24259	8.89627	9.35353	9.76927	9.05094	9.06296	9.08392	9.02431	8.82312	8.89166	8.96225	8.30727	8.63357	8.26995	8.31822	8.38627	8.06012
2	M2 UpD0-D3.6h IRF4_Induced NFkB_Signalling	MFSD5	79.798	10.3604	10.5574	10.2029	9.74489	9.70231	9.72429	11.3187	10.5164	10.3161	9.90224	10.4976	10.2705	9.47107	10.2777	10.1101	9.71885	10.2468	9.96232	9.58038	10.2428	9.79623	9.14634	9.97631	9.50708
2	M2 UpD0-D3.6h IRF4_Induced NFkB_Signalling	MGC16384	79.798	9.43533	8.48614	8.80003	8.68902	8.79199	8.91609	9.48639	9.34039	9.07867	9.06738	9.25792	9.05503	9.10983	9.07036	9.13362	8.70053	8.68352	8.84962	8.46438	8.35886	8.35736	8.37017	8.50257	8.10263
2	M2 UpD0-D3.6h IRF4_Induced NFkB_Signalling	NCOA1	79.798	10.5723	10.8636	10.4627	10.0916	9.48143	9.58038	10.4375	9.94665	9.42102	10.107	9.94286	9.95998	9.92845	9.42717	9.55037	9.58	9.40924	9.25909	9.37035	9.07329	9.10812	8.87796	8.96092	8.90175
2	M2 UpD0-D3.6h IRF4_Induced NFkB_Signalling	NMNAT3	79.798	8.55914	8.81109	8.72662	8.22361	8.64247	8.43115	8.34655	8.32343	8.2308	8.16716	8.3326	8.23518	8.30261	8.27599	8.12991	8.16553	8.07785	8.22707	8.04736	8.09369	8.07019	8.0294	8.12174	8.05796
2	M2 UpD0-D3.6h IRF4_Induced NFkB_Signalling	NR3C1	79.798	8.90354	8.89508	8.88809	8.46892	8.57087	8.50209	9.20133	8.69948	8.68416	8.77199	8.57573	8.55308	8.45201	8.43264	8.42486	8.50706	8.45407	8.27722	8.10701	8.23515	8.33854	8.37109	8.34637	8.26439
2	M2 UpD0-D3.6h IRF4_Induced NFkB_Signalling	PKIG	79.798	8.99352	9.49197	9.0971	9.05609	8.98633	9.03116	9.79634	9.00732	8.79096	8.8168	9.35438	8.84099	8.93395	9.02404	8.91847	8.78499	8.73888	8.97112	8.5798	8.5095	8.36515	8.2914	8.2297	8.24004
2	M2 UpD0-D3.6h IRF4_Induced NFkB_Signalling	PLCG1	79.798	9.84317	9.3935	9.5876	9.12202	9.0351	8.73717	9.01312	9.06535	8.91892	9.03239	8.99911	8.82713	9.01448	9.00526	8.98428	8.99114	8.85611	8.96539	8.6684	8.69664	8.80979	8.81055	8.76278	8.72878
2	M2 UpD0-D3.6h IRF4_Induced NFkB_Signalling	RAD23A	79.798	11.1643	11.3551	10.882	11.2874	11.3271	11	12.5404	11.3392	11.0388	11.0704	11.0765	10.9451	10.6229	10.8825	10.8422	10.5077	10.8392	10.8338	10.8904	11.0345	10.9744	10.7864	11.0632	10.9382
2	M2 UpD0-D3.6h IRF4_Induced NFkB_Signalling	RNF216	79.798	10.3901	10.2875	10.5345	9.59715	9.62561	9.44988	10.2481	9.62474	9.5566	9.61328	9.68332	9.30432	9.4486	9.48992	9.27536	9.19832	9.22126	9.03948	8.88462	9.0748	8.87587	9.07856	9.26992	8.91389
2	M2 UpD0-D3.6h IRF4_Induced NFkB_Signalling	RPL22L1	79.798	8.77009	9.40232	9.03289	9.08181	8.98552	8.78829	9.24508	9.00724	8.64569	9.05624	9.02062	8.92161	9.02969	9.08994	9.2356	9.05375	8.77173	8.85228	8.87659	8.72068	8.71175	8.42896	8.56002	8.69738
2	M2 UpD0-D3.6h IRF4_Induced NFkB_Signalling	RPS29	79.798	10.8865	11.2613	10.9651	11.0011	10.817	11.2001	11.4119	11.1379	10.7729	10.6763	11.2575	10.8636	10.0282	10.7521	9.96907	10.0129	10.3951	10.107	9.86972	10.9661	10.19	11.5754	10.7339	10.3873
2	M2 UpD0-D3.6h IRF4_Induced NFkB_Signalling	TMEM42	79.798	10.0721	10.2253	10.2347	9.51283	9.65702	9.47896	9.26843	9.39661	9.03917	9.34078	9.56895	9.24082	9.1678	9.19361	9.11176	9.00272	9.23655	8.96824	9.01388	9.03133	8.90796	9.0878	8.93994	8.93215
2	M2 UpD0-D3.6h IRF4_Induced NFkB_Signalling	TYSND1	79.798	10.3296	10.4164	10.2177	9.57299	9.85501	9.60265	9.72192	9.65592	9.38532	9.52205	9.73441	9.69746	9.47691	9.57343	9.48	9.35069	9.50131	9.38448	9.20464	9.33873	9.16813	9.2118	9.31774	9.14061
2	M2 UpD0-D3.6h IRF4_Induced NFkB_Signalling	WDR19	79.798	10.4719	10.2773	10.3058	9.57053	10.0235	9.64817	9.74791	9.91717	9.43411	9.4996	9.93973	9.60611	9.60475	9.64926	9.5809	9.46075	9.5728	9.48091	9.09441	9.42879	9.20696	9.74053	9.5438	9.42356
2	M2 UpD0-D3.6h IRF4_Induced NFkB_Signalling	ZNF34	79.798	9.23718	9.61341	9.25691	8.55718	8.55665	8.47208	8.75993	8.68746	8.60781	8.48534	8.71787	8.55152	8.32176	8.31251	8.28934	8.28841	8.41007	8.21316	8.16468	8.21596	8.18851	8.44217	8.51493	8.33537
2	M2 UpD0-D3.6h IRF4_Induced NFkB_Signalling	CCDC102A	78.7879	11.0519	10.7305	10.7609	10.0207	9.90764	9.7728	10.7925	11.5388	10.9503	11.3317	11.2769	11.1662	10.9723	10.8932	10.6069	10.5284	10.4879	10.3658	10.172	10.5088	10.0905	10.3943	10.4613	10.0218
2	M2 UpD0-D3.6h IRF4_Induced NFkB_Signalling	LRWD1	78.7879	10.5279	10.0875	10.4445	9.57825	9.82619	9.71401	11.4145	10.6308	10.0393	10.6071	10.6628	10.4504	10.6073	10.4474	10.4166	10.4719	10.2978	10.4753	10.4698	10.0598	10.132	9.55913	9.98483	9.87104
2	M2 UpD0-D3.6h IRF4_Induced NFkB_Signalling	PTTG1IP	78.7879	10.84	10.4557	10.565	10.3489	10.4244	10.4369	10.6522	10.815	10.9066	10.8151	10.792	10.846	10.7391	10.714	10.6899	10.7514	10.6699	10.6939	10.526	10.5924	10.5452	10.5979	10.5979	10.6075
2	M2 UpD0-D3.6h IRF4_Induced NFkB_Signalling	ZBTB3	78.7879	9.28504	8.74897	9.03567	8.59807	8.86328	8.75437	9.62634	9.51102	9.22097	9.27044	9.25656	9.27044	9.01468	9.19099	9.13619	8.96158	9.06888	8.98808	8.77793	8.9141	8.75094	8.95862	8.7232	8.87737
2	M2 UpD0-D3.6h IRF4_Induced NFkB_Signalling	ZBTB45	78.7879	9.64212	9.60584	9.50083	9.10377	8.9862	8.94526	9.7717	9.77662	9.48577	9.72104	9.69698	9.7514	9.75475	9.53862	9.43923	9.64154	9.32818	9.41205	9.5608	9.45818	9.36492	9.30432	9.28989	9.49407
2	M2 UpD0-D3.6h IRF4_Induced NFkB_Signalling	ABHD14B	77.7778	10.1317	10.0898	9.3455	8.76931	9.04746	8.61128	10.0094	9.17933	8.6036	8.68957	8.96619	8.68887	8.52781	8.80895	8.6333	8.35817	8.67216	8.64413	8.46962	8.8348	8.43308	8.49141	8.87159	8.4531
2	M2 UpD0-D3.6h IRF4_Induced NFkB_Signalling	B9D2	77.7778	9.61211	9.46937	9.60356	9.24452	9.20403	9.19809	9.95458	9.98107	9.54196	9.96699	9.97237	9.81393	9.73918	9.84562	9.60861	9.64392	9.78222	9.55266	9.29419	9.64546	9.23605	9.25156	9.45805	9.22981
2	M2 UpD0-D3.6h IRF4_Induced NFkB_Signalling	HS.213541	77.7778	11.2434	11.4839	11.0388	9.87399	10.4239	10.0353	10.7034	10.4273	9.61472	10.164	10.587	10.1772	9.77469	10.1319	9.75366	9.82437	10.2407	10.0677	9.67626	10.1309	9.92516	9.65251	10.167	9.55913
2	M2 UpD0-D3.6h IRF4_Induced NFkB_Signalling	IL9RP3	77.7778	8.88714	9.33385	9.20997	8.3868	8.39123	8.33054	8.62294	8.54104	8.14946	8.34932	8.56749	8.37355	8.21059	8.16198	8.362	8.26705	8.36417	8.42233	8.13163	8.51891	8.26658	8.12652	8.32444	8.2842
2	M2 UpD0-D3.6h IRF4_Induced NFkB_Signalling	RNF141	77.7778	9.89164	9.63162	9.70649	8.60069	8.68455	8.47152	8.78923	8.59735	8.46007	8.58078	8.53627	8.58891	8.46591	8.472	8.60271	8.47899	8.52648	8.53514	8.40597	8.61162	8.54794	8.45122	8.58146	8.54894
2	M2 UpD0-D3.6h IRF4_Induced NFkB_Signalling	TSPAN17	77.7778	9.82704	9.70086	9.77873	9.48342	9.41059	9.37735	9.82553	9.79707	9.62374	10.1214	10.0978	9.88103	9.86703	9.92635	9.7112	9.78817	9.85431	9.8058	9.60723	9.5968	9.42466	9.42953	9.51678	9.38484
2	M2 UpD0-D3.6h IRF4_Induced NFkB_Signalling	SARM1	76.7677	9.31353	9.40385	9.02913	8.57721	8.60053	8.46294	8.68378	8.87859	8.66918	8.95499	9.03645	8.75484	8.73621	8.58703	8.87918	8.55545	8.32999	8.35939	8.15	8.25719	8.24929	8.40065	8.39043	8.21183
2	M2 UpD0-D3.6h IRF4_Induced NFkB_Signalling	RIN3	75.7576	8.81699	8.78365	8.89762	8.41268	8.50694	8.3536	10.0959	8.30049	8.67334	8.31138	8.28054	8.32176	8.11062	8.39498	8.38621	8.21437	8.47516	8.45132	8.25105	8.31325	8.2474	7.9991	8.07363	8.06623
2	M2 UpD0-D3.6h IRF4_Induced NFkB_Signalling	EHD1	74.7475	13.2508	13.0743	12.9705	12.2385	12.8536	12.6909	12.937	12.7319	13.0106	13.0973	12.8347	12.8299	12.9204	12.9891	13.0384	12.6966	12.8059	12.747	12.7276	12.6613	12.5794	12.8962	12.298	12.3355
2	M2 UpD0-D3.6h IRF4_Induced NFkB_Signalling	FBLN2	73.7374	9.38333	10.2202	9.9029	8.04892	8.17604	8.07161	8.54707	8.07949	8.14753	8.10727	8.0904	8.08764	8.0976	8.05023	8.09705	8.10107	8.09286	8.17755	8.05155	8.19283	8.1591	8.06026	8.03805	8.0395
2	M2 UpD0-D3.6h IRF4_Induced NFkB_Signalling	FNDC11	73.7374	8.31716	8.63573	8.51754	8.11233	7.89157	7.93875	8.12106	7.87679	8.00371	7.96395	7.92924	8.09843	7.83957	7.93092	7.97442	7.9646	7.96731	7.972	7.91511	7.98888	7.94511	7.95265	7.89496	7.88714
2	M2 UpD0-D3.6h IRF4_Induced NFkB_Signalling	HLA-DPA1	73.7374	14.4053	14.5739	14.4586	13.7258	13.6798	13.7526	13.9375	13.5224	13.7285	13.7166	13.5069	13.8685	13.6755	13.7058	13.7949	13.7333	13.9753	14.0718	13.3881	13.7134	14.1137	13.27	13.438	13.3304
2	M2 UpD0-D3.6h IRF4_Induced NFkB_Signalling	RPL13A	73.7374	14.1533	14.2834	14.2681	14.0741	14.1673	14.2007	13.959	14.0741	13.9113	14.2029	14.1405	14.027	13.7285	13.947	13.7166	13.4047	13.6778	13.7134	13.3267	13.4591	13.146	13.6205	13.0883	13.2168
2	M2 UpD0-D3.6h IRF4_Induced NFkB_Signalling	GFOD2	72.7273	9.51297	9.30935	9.20293	9.06277	9.20008	8.86781	9.61427	9.44838	9.11715	9.44481	9.54785	9.01769	9.38632	9.3311	8.91482	9.34502	9.03659	8.95354	9.41875	8.94847	8.94248	8.98521	8.81063	8.89206
2	M2 UpD0-D3.6h IRF4_Induced NFkB_Signalling	LOC730316	72.7273	12.7139	12.0212	12.5325	12.0259	12.4709	12.0791	12.8442	12.9268	12.7173	12.6303	12.8695	12.3912	12.4122	12.7029	12.3495	12.5558	12.4031	12.4845	12.4972	12.5378	12.2865	12.1832	12.3832	12.2173
2	M2 UpD0-D3.6h IRF4_Induced NFkB_Signalling	OSGEP	72.7273	10.5501	10.3376	10.5813	10.4262	10.5518	10.2162	11.3642	10.7343	10.1958	10.5914	10.8381	10.1624	10.629	10.6795	10.1896	10.6711	10.4079	10.0461	10.3797	10.2726	9.77363	9.6746	10.0228	9.65298
2	M2 UpD0-D3.6h IRF4_Induced NFkB_Signalling	POM121C	72.7273	12.6718	11.9043	12.453	12.1769	12.3537	12.0232	12.7308	12.8098	12.4972	12.6122	12.6983	12.5291	12.4372	12.6532	12.3445	12.4239	12.4892	12.2865	12.5092	12.5355	12.2262	12.1854	12.4755	12.2505
2	M2 UpD0-D3.6h IRF4_Induced NFkB_Signalling	AP1M1	71.7172	11.8449	11.9342	11.7434	11.4126	11.2656	11.1863	12.6783	11.6957	11.2979	11.7141	11.779	11.4624	11.7383	12.274	11.8383	11.5574	11.699	11.6664	11.432	11.5135	11.2575	11.114	11.3271	11.1287
2	M2 UpD0-D3.6h IRF4_Induced NFkB_Signalling	CCNQ	71.7172	11.0898	11.8316	11.3582	10.0951	10.0763	9.87151	10.9493	10.4298	10.1804	10.4029	10.5686	10.2188	10.3539	10.6618	10.2702	10.473	10.6654	10.3982	10.1859	10.415	10.1986	9.79544	10.1642	10.0845
2	M2 UpD0-D3.6h IRF4_Induced NFkB_Signalling	DPH2	71.7172	11.0005	11.481	11.2123	11.1022	11.0423	10.9029	11.6356	11.505	11.2129	11.5086	11.5619	11.3054	11.4965	11.3736	11.1964	11.6796	11.2828	11.2529	11.4314	11.2815	11.2388	10.3055	11.3201	10.9995
2	M2 UpD0-D3.6h IRF4_Induced NFkB_Signalling	FAM32A	71.7172	10.9589	11.453	10.9025	10.7835	10.9717	10.7626	11.4206	11.279	10.9079	11.2674	11.4297	10.9347	11.1073	11.401	10.9442	11.141	11.2447	11.1171	11.0495	11.0715	11.0288	10.4651	10.9772	10.657
2	M2 UpD0-D3.6h IRF4_Induced NFkB_Signalling	MGME1	71.7172	11.0937	10.9183	11.3291	10.5562	10.6664	10.5659	11.3001	10.8112	10.4177	10.6844	11.0066	10.856	10.8059	11.059	10.9534	10.733	10.8831	10.8618	10.7228	10.5558	10.6007	10.6788	10.6926	10.6388
2	M2 UpD0-D3.6h IRF4_Induced NFkB_Signalling	PUF60	71.7172	12.7432	12.9008	12.5532	12.5822	12.7832	12.3317	13.7742	13.14	12.5477	13.0563	13.3362	12.6999	12.8962	13.2273	12.6109	12.7044	12.8866	12.3433	12.3659	12.4821	11.8982	11.0134	11.935	11.6043
2	M2 UpD0-D3.6h IRF4_Induced NFkB_Signalling	RCC1L	71.7172	8.73247	9.10064	8.63733	8.66513	8.83147	8.52641	10.0431	9.09279	8.62556	8.86102	9.05826	8.93788	8.84028	8.97909	8.83791	8.89498	9.00625	8.68399	8.59612	8.64962	8.74649	8.33398	8.62556	8.55787
2	M2 UpD0-D3.6h IRF4_Induced NFkB_Signalling	SUPT4H1	71.7172	10.0362	10.6823	10.1366	10.2474	10.2165	9.92501	10.4316	10.5968	10.2719	10.4715	10.4741	10.2488	10.367	10.3471	9.93192	10.3995	10.3093	10.2685	9.98523	10.0472	9.93892	9.60226	9.81359	9.76138
2	M2 UpD0-D3.6h IRF4_Induced NFkB_Signalling	TAX1BP3	71.7172	10.048	10.1436	9.81257	9.25667	9.24016	9.14149	10.1153	9.66503	9.22015	9.63255	9.81087	9.63878	9.99363	10.0997	9.73395	9.70458	10.0245	9.6038	9.65687	9.65214	9.44567	9.34968	9.53156	9.26942
2	M2 UpD0-D3.6h IRF4_Induced NFkB_Signalling	HS.145307	67.6768	9.69352	8.81891	8.63824	8.52396	8.6164	8.36874	8.87522	8.41876	8.27875	8.29655	8.49765	8.35548	8.48064	8.41803	8.46351	8.45604	8.36454	8.62793	8.39772	8.46288	8.2902	8.41366	8.5086	8.24277
2	M2 UpD0-D3.6h IRF4_Induced NFkB_Signalling	GABBR1	66.6667	9.32396	8.98583	9.37555	8.42108	8.34457	8.30122	8.38239	8.18109	8.13104	8.21152	8.13076	8.1278	8.13287	8.11743	8.21269	8.14992	8.16363	8.22572	8.07297	8.19007	8.06307	8.10174	8.09234	8.05023
2	M2 UpD0-D3.6h IRF4_Induced NFkB_Signalling	IRF8	66.6667	13.58	13.6205	13.5455	12.4745	11.9008	12.258	12.2865	10.8553	11.5738	11.5766	10.9118	11.1691	10.8723	11.1888	11.2562	10.6193	11.4132	11.5845	9.94253	11.2421	10.4291	10.0373	10.4993	9.75321
2	M2 UpD0-D3.6h IRF4_Induced NFkB_Signalling	LANCL2	66.6667	8.60856	8.78738	8.67571	8.33081	8.30285	8.33949	9.64026	9.031	8.87021	9.29777	8.99413	8.99114	8.82769	8.67869	8.61625	8.7709	8.71838	8.51333	8.64023	8.57505	8.58823	8.43693	8.53333	8.52495
2	M2 UpD0-D3.6h IRF4_Induced NFkB_Signalling	LGALS9	66.6667	8.84962	8.86704	8.69752	8.38194	8.42524	8.30268	9.03715	8.13181	8.28417	8.34893	8.20895	8.15805	8.35233	8.24804	8.2331	8.27526	8.40682	8.26059	8.07364	8.34455	8.13927	8.09522	8.28873	8.1253
2	M2 UpD0-D3.6h IRF4_Induced NFkB_Signalling	LOC100133583	66.6667	12.8231	12.9612	12.6676	12.3719	11.8858	11.9505	12.41	11.0991	11.3841	11.6836	11.1898	11.1094	11.7558	11.432	11.0227	11.8441	11.9375	11.9731	11.3475	11.5225	11.2613	11.4746	11.1185	10.363
2	M2 UpD0-D3.6h IRF4_Induced NFkB_Signalling	NUB1	66.6667	11.5071	11.3642	11.2339	10.3402	10.2527	10.2399	11.5262	10.004	9.91523	10.2403	9.9854	10.0445	10.0773	10.0428	10.0564	9.67398	10.2697	10.0894	9.47959	10.2253	9.65461	9.49669	9.987	9.58559
2	M2 UpD0-D3.6h IRF4_Induced NFkB_Signalling	ANKRD16	65.6566	9.02296	9.39099	9.28849	9.01465	8.98008	8.85098	9.52262	8.85791	8.88139	9.07077	8.97051	8.80953	8.77616	8.73633	8.68371	8.73453	8.76083	8.85036	8.71555	8.86495	8.77472	8.73992	8.84903	8.78049
2	M2 UpD0-D3.6h IRF4_Induced NFkB_Signalling	CLCF1	65.6566	9.66727	9.97615	9.59752	8.84917	8.47403	8.31979	9.80566	8.48811	8.83089	8.81854	8.34832	8.53755	8.46849	8.18317	8.26093	8.17335	8.22941	8.29162	8.11856	8.44897	8.27522	8.00433	8.37324	8.22178
2	M2 UpD0-D3.6h IRF4_Induced NFkB_Signalling	NR3C2	65.6566	9.35604	9.27714	9.26947	8.22551	8.21484	8.25157	8.77642	8.12612	8.17567	8.23062	8.09512	8.12748	8.19197	8.24923	8.1742	8.13829	8.16876	8.16869	8.13791	8.26421	8.11423	8.18329	8.1851	8.14379
2	M2 UpD0-D3.6h IRF4_Induced NFkB_Signalling	PLAC8	65.6566	13.0577	12.8678	12.9729	11.6417	10.8009	11.2543	11.4283	10.06	10.4138	10.9758	10.2263	10.1834	10.7347	10.9608	10.8049	10.3079	11.6525	11.4312	9.62255	11.5696	9.96046	9.81675	10.9144	9.33602
2	M2 UpD0-D3.6h IRF4_Induced NFkB_Signalling	USP9X	65.6566	8.83604	8.69489	8.6764	8.0423	8.23978	8.11243	8.38269	8.13858	8.0828	8.08389	8.26872	8.23518	8.37	8.24228	8.44662	8.32397	8.13437	8.2336	8.2169	8.12483	8.25117	8.2346	8.20297	8.19673
2	M2 UpD0-D3.6h IRF4_Induced NFkB_Signalling	LOC730415	62.6263	13.8606	14.148	14.1073	13.243	12.6236	12.6186	13.103	12.7696	12.4926	12.937	12.6894	12.4311	12.7291	13.0324	12.7114	12.8593	13.3614	13.1482	12.5139	12.828	12.5598	12.0791	12.3342	11.7038
2	M2 UpD0-D3.6h IRF4_Induced NFkB_Signalling	TIMM22	62.6263	11.4818	11.341	11.035	10.5481	10.2395	9.93619	12.1697	11.0288	10.3331	11.3494	10.9508	10.6745	11.1463	10.68	10.2655	11.1696	10.5497	10.2624	11.0464	10.8083	10.1019	10.6495	10.7124	10.3278
2	M2 UpD0-D3.6h IRF4_Induced NFkB_Signalling	C19orf66	60.6061	9.8995	10.1441	9.8972	9.47481	9.26716	9.11609	11.5356	9.38988	8.9664	9.52476	9.36695	9.24269	9.34066	9.26964	9.17886	9.28007	9.45245	9.24306	9.35687	9.45373	9.07174	9.28692	9.31424	9.02871
2	M2 UpD0-D3.6h IRF4_Induced NFkB_Signalling	TP73-AS1	60.6061	9.77435	9.63455	9.69838	9.19506	9.11415	8.90855	9.38808	9.21777	8.9423	9.15753	9.16831	9.0685	8.9282	9.17807	9.08792	8.96452	8.95747	8.86187	8.86813	9.21872	8.78738	9.05898	9.21837	8.91296
2	M2 UpD0-D3.6h IRF4_Induced NFkB_Signalling	HS.554324	59.596	11.6106	11.8621	11.4876	9.43226	9.69583	9.46148	12.6097	10.9101	10.0576	10.5556	11.0937	10.7017	11.1033	11.145	10.7171	10.9061	11.1532	10.8543	10.9094	11.0237	10.884	10.8369	10.4581	10.7899
2	M2 UpD0-D3.6h IRF4_Induced NFkB_Signalling	SNORD104	59.596	9.7997	10.2367	10.4799	9.66702	9.994	9.49755	10.0209	9.95789	9.49854	9.45324	9.75241	9.17328	9.71647	9.92609	9.57332	9.81643	9.98169	9.56673	9.91489	9.96974	9.62474	9.16898	9.69805	9.4087
2	M2 UpD0-D3.6h IRF4_Induced NFkB_Signalling	TRIM39	58.5859	10.8392	10.6604	10.5495	9.85064	9.95687	9.62242	10.3702	10.1015	10.0326	10.074	10.0794	10.0115	9.73244	9.82408	9.50198	9.80514	9.82493	9.63998	9.81038	10.0113	9.73585	10.1135	9.93297	9.95964
2	M2 UpD0-D3.6h IRF4_Induced NFkB_Signalling	HCG26	57.5758	9.07617	8.61062	8.71274	8.23546	8.12683	8.117	8.69988	8.13057	8.18914	8.23475	8.16891	8.13251	8.20187	8.06111	8.13401	8.23727	8.14815	8.2611	8.2169	8.34217	8.19963	8.17296	8.14602	8.16492
2	M2 UpD0-D3.6h IRF4_Induced NFkB_Signalling	MINOS1	56.5657	9.17517	9.1839	9.12359	8.68077	8.67348	8.57839	9.15384	8.72669	8.42366	8.87513	8.62484	8.52781	8.76009	8.53722	8.48504	8.5576	8.73205	8.69828	8.77071	8.5024	8.69812	8.68391	8.61049	8.60769
2	M2 UpD0-D3.6h IRF4_Induced NFkB_Signalling	CA11	55.5556	8.68856	9.07823	8.45282	8.38593	8.3993	8.20115	8.45849	8.36911	8.21884	8.3557	8.10717	8.16952	8.37407	8.13068	8.15891	8.1037	8.21196	8.17322	8.08257	8.14434	8.10491	8.15005	8.27003	8.26503
2	M2 UpD0-D3.6h IRF4_Induced NFkB_Signalling	CCND1	55.5556	9.31638	8.76419	8.87547	8.62003	8.42093	8.24669	8.08243	8.08824	8.0623	8.21843	7.96948	8.03127	7.93125	7.97696	7.97636	7.91391	7.99607	7.99031	7.96644	7.96225	7.97484	7.90761	7.89181	7.91856
2	M2 UpD0-D3.6h IRF4_Induced NFkB_Signalling	FHL1	55.5556	8.92792	9.21954	8.88199	8.45761	8.85725	8.58193	8.97314	8.4477	8.64202	8.39039	8.26343	8.51383	8.1974	8.43334	8.36544	8.17855	8.52648	8.3157	8.27039	8.14812	8.18631	8.15164	8.1934	8.11216
2	M2 UpD0-D3.6h IRF4_Induced NFkB_Signalling	HLA-DRB4	55.5556	13.3385	13.2019	12.7764	12.748	11.6152	11.3635	12.8574	11.468	11.1626	12.1581	11.6673	10.9111	12.418	12.0916	11.4671	12.3459	12.5642	12.272	12.2083	12.3681	11.389	12.0307	11.7649	11.0823
2	M2 UpD0-D3.6h IRF4_Induced NFkB_Signalling	HS.276860	55.5556	9.81359	9.81331	9.91583	9.89624	10.0705	10.1057	9.9866	9.72143	9.62214	9.75103	9.7541	9.53667	9.55491	9.94135	9.51389	9.4877	10.008	9.8	9.37253	9.66797	9.56715	9.25615	9.36165	9.29209
2	M2 UpD0-D3.6h IRF4_Induced NFkB_Signalling	HS.403972	55.5556	9.62474	9.10126	9.13362	8.83904	9.18138	9.01578	10.3423	8.61155	9.87332	8.86226	8.62542	8.6511	8.63112	8.50447	8.46412	8.40958	8.76939	8.56504	8.26789	8.80426	8.55854	8.31344	8.93526	8.3502
2	M2 UpD0-D3.6h IRF4_Induced NFkB_Signalling	HVCN1	55.5556	11.3886	11.627	11.2025	10.7451	10.7689	10.626	11.3781	9.57376	10.2736	9.73011	9.30121	9.44562	9.34458	9.37733	9.21467	9.10901	9.2765	9.44514	8.62819	9.05768	8.70588	8.37534	8.83579	8.4582
2	M2 UpD0-D3.6h IRF4_Induced NFkB_Signalling	IER5	55.5556	11.2223	10.8175	10.4404	10.3367	10.3017	10.1736	11.0579	9.97005	10.3212	10.0296	9.83655	9.97571	9.65745	9.942	9.71101	9.4911	9.97673	9.81159	9.36006	9.71073	9.6827	9.09215	9.47231	9.45081
2	M2 UpD0-D3.6h IRF4_Induced NFkB_Signalling	LOC645236	55.5556	8.70788	8.91322	9.42139	8.85999	8.40242	8.77285	9.58491	8.76412	9.17001	9.14029	8.57355	9.01448	8.71257	8.32899	8.75399	8.56282	8.17617	8.57155	8.64023	8.24727	8.57168	8.255	8.19949	8.40841
2	M2 UpD0-D3.6h IRF4_Induced NFkB_Signalling	MAP1LC3B	55.5556	11.1339	11.0868	11.105	10.7237	10.6421	10.9436	11.6896	11.0661	11.1608	10.9486	10.8181	10.9826	10.4944	10.562	10.5243	10.5497	10.5426	10.4925	10.6239	10.3398	10.4426	10.9457	10.434	10.4537
2	M2 UpD0-D3.6h IRF4_Induced NFkB_Signalling	MX2	55.5556	10.7167	10.7387	10.5833	9.08681	9.07151	9.08257	9.57587	8.79784	9.06938	8.93314	8.73342	9.07219	8.50009	8.56043	9.03363	8.34455	8.86284	8.97429	8.27389	9.21987	8.78318	8.25764	8.87452	8.42162
2	M2 UpD0-D3.6h IRF4_Induced NFkB_Signalling	NCR3	55.5556	9.67597	10.1232	9.9188	9.30893	9.41178	9.26811	10.0178	8.96059	9.27304	9.05244	9.12903	9.21556	8.62272	8.75002	8.89773	8.44369	8.96344	9.00652	8.12276	8.47555	8.49084	8.0005	8.19568	8.13664
2	M2 UpD0-D3.6h IRF4_Induced NFkB_Signalling	ORAOV1	55.5556	10.3607	10.1153	10.5527	9.10136	9.28525	8.93081	9.62854	9.48295	9.48143	9.79544	9.5696	9.36046	9.68989	9.50993	9.26305	9.79676	9.57656	9.2777	9.79296	9.47692	9.2707	9.44286	9.56035	9.50634
2	M2 UpD0-D3.6h IRF4_Induced NFkB_Signalling	PBX2	55.5556	10.1753	9.93415	10.1842	9.19585	9.41483	9.1927	9.94648	9.23304	9.06686	9.38028	9.36246	9.34768	9.3804	9.35844	9.17716	9.3558	9.36515	9.22944	9.51969	9.28584	9.21089	9.30137	9.31313	9.20008
2	M2 UpD0-D3.6h IRF4_Induced NFkB_Signalling	PHF20	55.5556	10.2461	10.0236	9.91131	9.1739	9.42748	9.29555	10.1378	9.18744	9.08943	9.08498	8.9736	9.00156	9.11328	9.10369	9.16696	8.89436	9.19832	9.05747	8.84828	9.00663	9.01916	8.77669	9.00922	8.85177
2	M2 UpD0-D3.6h IRF4_Induced NFkB_Signalling	PTPN6	55.5556	13.1267	13.0709	12.9053	12.5355	12.6288	12.2995	13.5455	11.5823	12.2	11.7307	11.1389	11.6575	10.694	11.5388	11.3127	10.6102	11.9459	11.6866	10.3766	12.1051	11.178	10.3534	11.9603	10.9577
2	M2 UpD0-D3.6h IRF4_Induced NFkB_Signalling	TMEM131L	55.5556	10.5758	10.4131	10.3986	10.3291	10.5403	10.3374	10.5765	10.2386	9.98415	10.0006	9.86465	9.97631	9.49642	9.88283	9.7939	9.34114	9.96311	9.89735	8.77613	9.80548	9.43952	8.66742	9.38507	8.89762
2	M2 UpD0-D3.6h IRF4_Induced NFkB_Signalling	ZBTB16	55.5556	8.80871	11.0573	8.70633	7.92722	7.90935	7.97366	8.02722	8.05701	7.94861	7.98258	8.0094	7.85244	8.00778	7.9171	7.92115	7.95064	8.02994	7.9331	8.00936	7.92812	7.94963	7.91988	8.01148	7.94508
2	M2 UpD0-D3.6h IRF4_Induced NFkB_Signalling	SSBP4	54.5455	9.88719	10.0901	10.1624	8.98599	9.19635	9.07363	10.167	8.99685	9.09128	8.99197	9.00625	8.81023	8.86728	9.01438	8.90195	8.77277	8.85188	8.88127	8.53214	8.7962	8.5707	8.3908	8.75673	8.67091
2	M2 UpD0-D3.6h IRF4_Induced NFkB_Signalling	BCKDHA	53.5354	10.9493	11.2793	10.6886	10.2727	10.509	10.5035	12.0267	10.6547	10.3733	10.5403	10.691	10.3704	10.4964	10.3568	10.081	10.162	9.99704	9.64843	10.289	10.2337	9.91217	10.795	10.3907	10.3412
2	M2 UpD0-D3.6h IRF4_Induced NFkB_Signalling	CCDC106	53.5354	11.7005	11.764	12.0259	11.2861	11.4553	11.3921	12.7782	11.1691	11.1699	11.1263	11.1748	11.0519	11.342	11.3407	11.2718	11.059	11.0252	10.7615	11.1724	11.0294	10.5354	11.4031	11.179	10.5882
2	M2 UpD0-D3.6h IRF4_Induced NFkB_Signalling	DSP	53.5354	9.12938	9.54935	9.46461	8.08275	8.23978	8.18046	8.57784	8.15144	8.18945	8.16781	8.27856	8.08671	8.13486	8.10066	8.0514	8.20136	8.1141	8.04918	8.14841	8.15976	8.0157	8.25975	8.07128	8.17581
2	M2 UpD0-D3.6h IRF4_Induced NFkB_Signalling	IRS2	53.5354	9.54737	9.98073	9.41256	8.2059	8.40924	8.44229	8.80124	8.33984	8.32919	8.24154	8.2574	8.17504	8.19305	8.29782	8.21184	8.21173	8.17506	8.18851	8.10378	8.13838	8.09901	8.21624	8.2805	8.11284
2	M2 UpD0-D3.6h IRF4_Induced NFkB_Signalling	LOC649447	53.5354	13.7647	13.947	13.6544	13.5157	13.6755	13.4002	13.4479	13.4074	13.3775	13.5888	13.5182	13.209	13.1998	13.3017	13.3139	13.1482	13.2916	12.9469	13.2471	13.2739	13.0065	13.4749	13.3122	13.0504
2	M2 UpD0-D3.6h IRF4_Induced NFkB_Signalling	LOC653103	53.5354	10.2899	10.1204	10.0438	9.84467	10.2169	10.0966	11.764	9.97941	10.0421	9.81055	10.0178	9.53736	9.76309	9.97571	9.84441	9.63483	9.72589	9.72029	9.63425	9.79815	9.53018	9.90693	9.84269	9.61682
2	M2 UpD0-D3.6h IRF4_Induced NFkB_Signalling	LOC730525	53.5354	8.92605	9.32294	8.80426	8.66637	8.82277	8.73349	8.89476	8.19344	8.40608	8.311	8.23373	8.17675	8.17124	8.20494	8.22399	8.10484	8.10245	8.22266	8.1094	8.16295	8.08167	8.31194	8.01472	8.12986
2	M2 UpD0-D3.6h IRF4_Induced NFkB_Signalling	NBDY	53.5354	12.4146	12.4297	12.3997	12.3052	12.4321	12.3659	12.5092	12.382	12.3073	12.3366	12.3529	12.304	12.3505	12.119	12.2464	11.974	12.0317	11.9685	11.8415	12.121	11.5449	12.3879	12.1832	11.8383
2	M2 UpD0-D3.6h IRF4_Induced NFkB_Signalling	OVGP1	53.5354	9.77864	9.24765	9.87831	8.69962	8.69183	8.62945	9.60656	8.61818	8.97304	8.65299	8.80476	8.55741	8.42223	8.43583	8.42268	8.49277	8.52786	8.48744	8.68334	8.48903	8.42949	8.85392	8.50994	8.54863
2	M2 UpD0-D3.6h IRF4_Induced NFkB_Signalling	PP7080	53.5354	9.48334	9.34943	9.48091	8.82445	8.86941	8.80786	8.87522	9.15544	8.66783	8.85432	9.07643	8.98853	8.82404	8.73484	8.63785	8.8125	8.69691	8.67946	8.87838	8.87324	8.6142	9.13784	9.00232	8.69948
2	M2 UpD0-D3.6h IRF4_Induced NFkB_Signalling	RRAGA	53.5354	11.7383	11.4762	11.4451	11.0148	10.713	10.7209	11.0932	11.2031	10.8013	11.0991	11.2587	11.2336	10.8103	10.7138	10.7005	10.6059	10.5799	10.5185	10.7587	10.6201	10.5875	11.046	11.0294	10.8033
2	M2 UpD0-D3.6h IRF4_Induced NFkB_Signalling	SFT2D3	53.5354	8.66413	8.3411	8.59536	8.05226	8.18237	8.24031	8.86633	8.2253	8.11274	8.16597	8.16196	8.19038	8.133	8.08269	8.06837	8.10447	8.10517	8.09908	7.96836	8.03701	8.10806	8.12798	8.22417	8.13771
2	M2 UpD0-D3.6h IRF4_Induced NFkB_Signalling	SLC41A3	53.5354	11.1049	11.503	11.0461	10.1301	10.4081	10.2936	10.6972	10.6624	10.1882	10.386	10.6379	10.3705	10.1938	10.2653	10.0671	10.0866	10.2841	9.86815	10.3971	10.353	9.97056	10.6262	10.3398	10.0797
2	M2 UpD0-D3.6h IRF4_Induced NFkB_Signalling	TSC22D3	53.5354	12.8762	13.0524	13.209	9.44776	9.42926	9.7404	10.0476	9.26057	10.4651	9.42331	8.94575	9.31277	8.69153	8.81729	8.81109	8.60312	8.65434	8.90607	8.83439	8.74241	8.60632	9.99981	8.63393	8.76045
2	M2 UpD0-D3.6h IRF4_Induced NFkB_Signalling	ZNF395	53.5354	12.0345	12.2312	11.9325	11.0855	11.5327	11.1799	11.5377	11.2651	11.4855	10.8242	11.1372	10.7312	10.3973	10.8731	10.8626	9.97941	10.6645	10.5659	10.1511	10.4871	9.92845	11.3883	10.3477	9.85811
2	M2 UpD0-D3.6h IRF4_Induced NFkB_Signalling	ZNF415	53.5354	8.88247	9.08239	8.99349	8.30119	8.53264	8.40888	8.61169	8.34926	8.29307	8.31784	8.35774	8.32794	8.25153	8.15215	8.35537	8.30081	8.16299	8.34598	8.19106	8.18609	8.13927	8.42068	8.11727	8.14861
2	M2 UpD0-D3.6h IRF4_Induced NFkB_Signalling	PPP1R3E	52.5253	9.40939	8.78863	8.83064	8.51897	8.52047	8.35629	9.26403	8.62095	8.36802	8.4664	8.65956	8.34773	8.62086	8.41268	8.38797	8.41366	8.29246	8.37238	8.38808	8.36969	8.22539	8.90984	8.65148	8.31703
2	M2 UpD0-D3.6h IRF4_Induced NFkB_Signalling	SCIMP	52.5253	10.7498	9.8315	9.9048	8.95298	8.64057	8.76756	9.54832	8.47009	8.56696	8.72188	8.52547	8.71043	8.48856	8.42468	8.59423	8.34096	8.43554	8.55789	8.26235	8.47627	8.24269	8.18178	8.31976	8.21068
2	M2 UpD0-D3.6h IRF4_Induced NFkB_Signalling	NAALADL1	51.5152	9.48003	9.85846	9.7101	8.89476	8.66161	9.16068	9.99036	8.88134	9.06878	8.70214	9.14011	9.09578	8.49922	8.56788	8.87169	8.34659	8.41293	8.52867	8.21126	8.34543	8.42909	8.48778	8.41029	8.15373
2	M2 UpD0-D3.6h IRF4_Induced NFkB_Signalling	SHISA8	51.5152	8.49403	8.35293	8.43684	8.06209	8.09501	8.04919	8.11626	7.97263	8.08953	7.92497	7.97655	8.04964	7.95743	8.02786	8.03121	8.06418	7.93347	8.01362	7.92726	8.0038	7.97888	7.92499	7.95863	7.93492
2	M2 UpD0-D3.6h IRF4_Induced NFkB_Signalling	ENO3	50.5051	9.92088	9.13524	9.392	9.92183	9.81215	9.35286	9.43158	9.59229	9.17517	9.22716	9.45913	9.04781	9.22509	9.34013	9.08213	9.157	9.12869	9.01916	8.98951	9.16306	8.76909	9.20936	9.48462	8.80609
2	M2 UpD0-D3.6h IRF4_Induced NFkB_Signalling	GAS7	50.5051	8.93704	8.15856	8.89053	8.45367	8.36138	8.46181	10.6166	9.14874	9.21701	9.23547	8.5004	8.54554	8.13113	7.99721	8.1196	8.0836	8.12775	8.29455	7.96324	8.21361	8.0434	7.91576	8.03099	7.96947
2	M2 UpD0-D3.6h IRF4_Induced NFkB_Signalling	LOC387825	50.5051	11.8009	11.4914	12.0029	10.7704	10.4231	10.9974	11.8287	10.5672	11.105	10.7959	10.5075	11.1614	10.223	10.0808	10.8671	9.96355	9.84834	10.3938	9.99946	9.56364	9.97103	10.4012	9.41844	9.90907
2	M2 UpD0-D3.6h IRF4_Induced NFkB_Signalling	LOC728031	50.5051	13.567	14.3785	14.0844	13.5624	13.4613	13.7333	14.1755	13.6029	13.9295	13.4138	13.6058	13.9183	13.2368	13.3941	13.7874	13.4681	13.2795	13.4792	13.2304	12.9834	13.5135	13.3304	12.615	13.1183
2	M2 UpD0-D3.6h IRF4_Induced NFkB_Signalling	MAP6D1	50.5051	8.86008	9.25398	8.95457	8.81864	8.84983	8.72583	9.31811	8.58338	8.80602	9.05877	8.84736	8.57955	8.85219	8.73835	8.60408	8.83439	8.61311	8.43388	8.56704	8.73783	8.46901	8.44606	8.6401	8.35481
2	M2 UpD0-D3.6h IRF4_Induced NFkB_Signalling	TCTN1	50.5051	10.616	10.9103	10.6467	9.81442	10.0624	9.47057	10.9678	9.85292	9.24839	9.31325	9.7717	9.07219	9.30648	9.09137	8.86682	9.08593	9.04808	8.90984	8.61672	9.05839	8.54844	9.02543	9.14592	8.50199
2	M2 UpD0-D3.6h IRF4_Induced NFkB_Signalling	AARSD1	49.4949	9.8501	9.63128	9.71238	9.84159	10.0564	9.8485	10.4837	9.97439	9.55117	9.58293	9.96922	9.57291	9.60001	9.46075	9.5344	9.5612	9.61023	9.38974	9.54289	9.37727	9.36346	9.03694	9.0388	9.04296
2	M2 UpD0-D3.6h IRF4_Induced NFkB_Signalling	BBS4	49.4949	9.06961	9.14489	8.92531	8.84669	9.0351	8.86857	8.87896	9.07775	8.61695	8.88648	9.26765	8.66767	8.73335	8.68941	8.59273	8.5337	8.65658	8.48153	8.54639	8.67838	8.5049	8.5344	8.55684	8.25029
2	M2 UpD0-D3.6h IRF4_Induced NFkB_Signalling	BPHL	49.4949	9.36165	9.26114	9.04413	9.22208	9.35412	9.14693	9.25759	9.06888	9.03278	9.18731	9.13511	8.89675	9.02474	8.99361	8.97587	8.86857	8.80204	8.72147	8.77918	8.68231	8.49461	8.75063	8.56981	8.50476
2	M2 UpD0-D3.6h IRF4_Induced NFkB_Signalling	CBR3	49.4949	9.44366	9.17185	9.0002	9.38821	9.09766	9.01481	9.75601	9.11025	8.73812	9.27408	9.17729	8.80834	8.99849	9.05244	8.8739	8.72201	8.84484	8.51333	8.44344	8.34073	8.16297	8.21379	8.24675	8.06877
2	M2 UpD0-D3.6h IRF4_Induced NFkB_Signalling	DDX50	49.4949	10.453	10.5862	10.5289	10.5153	10.7196	10.4773	10.3854	10.2956	10.1353	10.2005	10.2261	10.2037	10.2978	10.227	10.1	10.2572	10.1744	9.90693	10.0507	10.0906	9.61052	9.92363	9.77735	9.40057
2	M2 UpD0-D3.6h IRF4_Induced NFkB_Signalling	DPH5	49.4949	10.3623	10.5441	10.4301	10.4291	10.5026	10.2614	10.2622	10.1439	9.79293	10.0167	10.1671	9.78667	9.88078	9.86476	9.46646	9.81486	9.776	9.34909	9.70736	9.69327	9.40789	9.36081	9.36969	9.3785
2	M2 UpD0-D3.6h IRF4_Induced NFkB_Signalling	EEF1B2	49.4949	14.0931	14.4053	14.374	14.0455	14.2132	14.0931	14.222	14.031	13.7308	14.1776	14.2203	14.06	14.0354	14.031	13.6734	14.1115	14.0864	13.6568	14.091	14.0648	13.7667	14.0043	14.0695	13.9017
2	M2 UpD0-D3.6h IRF4_Induced NFkB_Signalling	EIF3D	49.4949	13.2639	13.5579	12.9873	12.7173	13.3244	12.6073	14.031	12.7383	12.4983	12.5366	12.8849	12.5325	12.3741	12.3601	12.2396	12.3016	12.5203	11.9641	12.19	12.4041	11.9633	11.9704	12.2365	11.6728
2	M2 UpD0-D3.6h IRF4_Induced NFkB_Signalling	EIF4A2	49.4949	14.0043	14.477	14.4524	13.2532	13.6475	13.5157	13.4849	13.6205	13.2471	13.0085	13.3304	13.3698	13.3556	13.215	13.2739	13.3594	13.1653	13.243	13.1582	13.2368	13.2532	13.2872	13.2739	13.349
2	M2 UpD0-D3.6h IRF4_Induced NFkB_Signalling	ETV6	49.4949	10.5682	10.4921	10.7572	10.4958	10.392	10.7124	10.8676	10.4804	10.6033	10.6284	10.5562	10.6313	10.4077	10.5399	10.8069	9.98938	10.3358	10.6327	9.80583	10.1066	10.2657	9.91944	10.0748	10.4287
2	M2 UpD0-D3.6h IRF4_Induced NFkB_Signalling	GRB2	49.4949	10.9946	11.1674	10.7295	11.1686	10.7556	10.8098	11.1372	10.7807	10.7798	10.8321	10.6769	10.2933	10.9358	10.7883	10.6426	10.7005	10.8192	10.689	10.4436	10.6518	10.3488	10.5414	10.2947	10.0298
2	M2 UpD0-D3.6h IRF4_Induced NFkB_Signalling	GRINA	49.4949	9.32701	9.66754	9.05602	9.64473	9.58433	9.15716	10.2804	9.61508	9.30294	9.30428	9.41664	9.21499	9.19499	9.29025	9.18289	9.18602	9.06753	9.02704	9.00433	9.15607	8.85401	8.96068	9.21438	8.85246
2	M2 UpD0-D3.6h IRF4_Induced NFkB_Signalling	HEBP1	49.4949	10.3099	10.7672	10.1195	10.4511	10.6261	10.2583	10.47	9.95657	9.71696	10.1361	9.90446	9.44481	10.368	10.2208	9.69396	10.1157	9.97819	9.60356	9.75721	9.81071	9.38444	9.76781	9.59488	9.09058
2	M2 UpD0-D3.6h IRF4_Induced NFkB_Signalling	KANSL2	49.4949	11.679	11.8355	11.6828	11.2083	11.3593	11.336	11.3942	11.3582	10.9863	11.3271	11.481	11.1573	11.266	11.1165	10.7738	11.2427	11.0985	10.7779	11.2001	11.0721	10.7695	10.934	10.9758	10.8553
2	M2 UpD0-D3.6h IRF4_Induced NFkB_Signalling	LOC441408	49.4949	9.47667	9.70887	9.25467	9.5892	9.52812	9.23969	10.9144	9.31277	8.8077	9.41098	9.29599	8.9171	9.16291	8.97549	8.82963	8.97042	8.76979	8.59248	8.79499	8.60318	8.4979	8.56327	8.51874	8.36207
2	M2 UpD0-D3.6h IRF4_Induced NFkB_Signalling	LOC728457	49.4949	11.1384	10.4282	11.1299	10.7083	10.8865	10.5905	11.1822	10.7903	10.5691	10.7744	10.7523	10.374	10.5611	10.6463	10.4651	10.4897	10.5001	10.4737	10.6193	10.6175	10.1856	10.9684	10.9293	10.3967
2	M2 UpD0-D3.6h IRF4_Induced NFkB_Signalling	LRSAM1	49.4949	10.9898	10.4572	10.6831	10.6211	10.6229	10.5293	10.7479	10.7568	10.4757	10.6926	10.7285	10.5033	10.6459	10.485	10.5391	10.372	10.2099	10.3498	10.169	10.3995	10.1618	10.4342	10.329	10.0114
2	M2 UpD0-D3.6h IRF4_Induced NFkB_Signalling	MATK	49.4949	9.53018	9.95752	9.12818	9.17777	9.36812	8.65695	9.3949	9.0156	8.49672	9.04124	8.79984	8.48187	8.66113	8.45751	8.20554	8.41077	8.25414	8.06204	8.2272	8.15791	8.0986	8.11567	8.03259	8.12423
2	M2 UpD0-D3.6h IRF4_Induced NFkB_Signalling	MRPS26	49.4949	10.335	10.7005	10.4635	10.6489	10.7512	10.3729	11.806	10.7945	10.1701	10.523	10.6786	10.2477	10.3047	10.4032	9.98911	10.1994	10.0962	9.87938	10.1819	10.4	10.1127	9.55579	10.0989	9.98641
2	M2 UpD0-D3.6h IRF4_Induced NFkB_Signalling	NR2C2AP	49.4949	10.2211	10.5809	10.2837	10.3729	10.3093	10.0729	10.6681	10.5875	10.0225	10.2554	10.4875	10.1033	10.2103	10.2954	10.132	10.0215	9.98435	9.9026	9.873	9.89608	9.68516	8.98903	9.48562	9.43144
2	M2 UpD0-D3.6h IRF4_Induced NFkB_Signalling	ODF2L	49.4949	8.67342	8.76257	8.6518	8.7629	8.92893	8.56464	8.643	8.41268	8.2066	8.32165	8.36283	8.13123	8.37352	8.33391	8.21873	8.45216	8.42553	8.20197	8.33467	8.30261	8.1285	8.33345	8.37992	8.25823
2	M2 UpD0-D3.6h IRF4_Induced NFkB_Signalling	PLA2G4C	49.4949	10.0837	10.0769	9.19885	9.3935	9.72765	8.87986	9.04847	8.90655	8.70284	8.92716	8.79199	8.53348	8.88341	8.45238	8.30029	8.61612	8.24778	8.30591	8.37601	8.38895	8.18059	8.19673	8.39874	8.1532
2	M2 UpD0-D3.6h IRF4_Induced NFkB_Signalling	RPL27	49.4949	14.3468	14.5147	14.4943	14.5056	14.5228	14.4607	14.436	14.3385	14.2918	14.407	14.2976	14.4318	14.3009	14.2573	13.9952	14.2101	14.2793	13.8991	14.1926	14.196	13.9654	14.0501	14.1251	13.8835
2	M2 UpD0-D3.6h IRF4_Induced NFkB_Signalling	RPS3AP43	49.4949	9.20267	10.0128	9.54612	9.03613	8.96931	9.00735	9.6512	8.89255	8.92773	8.91694	9.01334	8.87676	8.81751	8.9625	8.83675	9.05165	8.80729	8.85933	8.79736	8.81691	8.73007	8.70107	8.73255	8.72169
2	M2 UpD0-D3.6h IRF4_Induced NFkB_Signalling	STRADB	49.4949	10.1945	10.9478	10.3066	10.2122	10.42	10.1502	10.657	10.3943	9.85372	10.2801	10.5055	10.008	10.1878	10.1105	9.99036	10.1389	9.86136	9.73007	9.7876	9.92829	9.50268	9.65091	9.75426	9.57355
2	M2 UpD0-D3.6h IRF4_Induced NFkB_Signalling	STX4	49.4949	10.0476	10.2144	10.0875	9.92829	9.73062	10.1202	10.2023	9.76844	9.67712	9.63047	9.87682	9.78157	9.57953	9.70816	9.64955	9.6853	9.45036	9.54798	9.51159	9.48783	9.70393	9.89573	9.87151	9.2965
2	M2 UpD0-D3.6h IRF4_Induced NFkB_Signalling	THBS3	49.4949	9.08934	8.87651	9.183	8.63061	8.69346	8.65666	8.74905	8.79103	8.44762	8.64285	8.65074	8.53032	8.60208	8.5511	8.58343	8.61434	8.55499	8.5544	8.53091	8.5194	8.54194	8.69191	8.48811	8.44827
2	M2 UpD0-D3.6h IRF4_Induced NFkB_Signalling	TMEM254	49.4949	10.0908	10.0829	9.74631	9.17908	9.18744	9.11099	9.75845	9.18973	8.84677	9.15121	9.33361	9.08213	9.01494	8.84076	8.95568	9.11121	8.72654	8.78779	8.73143	8.81039	8.64709	8.91437	8.76701	8.73899
2	M2 UpD0-D3.6h IRF4_Induced NFkB_Signalling	WDR74	49.4949	10.9723	11.0882	10.8838	10.9183	10.9902	10.7704	11.8751	10.8276	10.4745	10.8709	10.9282	10.4795	10.701	10.5862	10.2266	10.7283	10.7233	10.1922	10.8994	10.5634	10.2023	10.0057	10.4478	9.95344
2	M2 UpD0-D3.6h IRF4_Induced NFkB_Signalling	BLOC1S4	48.4848	10.9859	10.98	11.3121	10.1123	10.2851	10.2363	10.1364	10.0618	9.77029	10.1166	10.3347	9.88056	10.0667	9.91427	9.76042	10.0775	9.88042	9.67772	10.3001	10.03	9.80583	10.1787	9.95408	9.78984
2	M2 UpD0-D3.6h IRF4_Induced NFkB_Signalling	BOD1	48.4848	10.8735	10.8648	10.7525	10.3212	10.6453	10.1026	10.1733	10.2257	10.1711	10.1163	10.3029	9.99382	10.1952	10.2128	9.70421	10.2786	10.1535	9.76737	10.3947	10.0573	9.75426	10.3212	9.9854	9.93523
2	M2 UpD0-D3.6h IRF4_Induced NFkB_Signalling	EIF3H	48.4848	13.1998	13.27	12.6909	12.6834	12.9419	12.7797	13.3881	12.6073	12.2752	12.6486	12.5917	12.5177	12.2995	12.4972	12.261	12.3736	12.4321	12.259	12.3307	12.4661	12.0353	12.6764	12.3798	12.153
2	M2 UpD0-D3.6h IRF4_Induced NFkB_Signalling	FAM24B	48.4848	9.13654	9.34768	9.52549	9.17001	9.43356	9.24789	9.72867	9.18032	8.87788	8.90009	9.18913	8.74716	8.90138	9.01228	8.74609	8.66153	8.89571	8.6965	8.90607	8.90408	8.69067	8.74767	8.67927	8.75934
2	M2 UpD0-D3.6h IRF4_Induced NFkB_Signalling	GRAMD1A	48.4848	10.886	11.0709	10.861	11.575	11.4914	11.3159	11.9813	10.7738	10.5111	11.0778	10.7584	10.5905	10.6369	10.6066	10.4689	10.5562	10.7377	10.3376	10.5289	10.7485	9.97551	10.869	10.7138	10.2607
2	M2 UpD0-D3.6h IRF4_Induced NFkB_Signalling	HS.551143	48.4848	8.85037	8.40937	8.77268	8.68539	8.31269	8.58404	8.77155	8.46014	8.67086	8.58031	8.44984	8.57081	8.42338	8.20704	8.54154	8.34893	8.43043	8.48969	8.20556	8.38701	8.26011	8.16583	8.20899	8.26405
2	M2 UpD0-D3.6h IRF4_Induced NFkB_Signalling	KLHL36	48.4848	10.4673	10.4545	10.4771	10.0892	10.2029	10.1093	10.5434	9.83102	9.64817	9.8813	10.0736	9.63227	9.69021	9.87471	9.55793	9.60944	9.98435	9.72143	9.61211	9.85175	9.68954	9.96262	9.88962	9.84269
2	M2 UpD0-D3.6h IRF4_Induced NFkB_Signalling	MS4A14	48.4848	8.78545	8.64059	8.46591	7.90762	7.98159	8.0204	8.13926	7.94016	8.00405	8.02866	8.0349	7.961	8.0054	7.98289	8.05061	7.94196	8.05752	8.02195	7.94184	7.96039	7.9919	7.87532	8.11507	7.98938
2	M2 UpD0-D3.6h IRF4_Induced NFkB_Signalling	RNF41	48.4848	9.89789	10.1446	9.70921	9.09484	9.25062	8.90703	9.13875	9.38169	8.90655	9.02101	9.43684	9.11597	8.8417	9.18796	8.77784	8.92478	9.17692	8.80313	9.05062	9.02343	8.79594	9.30686	8.88105	8.89062
2	M2 UpD0-D3.6h IRF4_Induced NFkB_Signalling	RPL13AP6	48.4848	13.5695	13.4112	13.3037	13.0866	12.8681	12.5585	14.2757	12.615	12.295	12.6851	12.7401	12.3553	12.5366	12.4926	12.1832	12.3505	12.4625	12.3997	12.3516	12.4495	12.3237	12.72	12.4471	12.3573
2	M2 UpD0-D3.6h IRF4_Induced NFkB_Signalling	RPL29P12	48.4848	13.6475	13.9183	13.9982	13.8537	13.7949	13.6987	14.0931	13.8146	13.3718	13.6453	13.8705	13.3204	13.4523	13.5605	13.2795	13.4939	13.6475	13.3577	13.5157	13.5958	13.4339	13.6798	13.5318	13.4939
2	M2 UpD0-D3.6h IRF4_Induced NFkB_Signalling	RPL36	48.4848	13.5318	14.007	13.762	13.9536	13.8474	13.7569	14.2349	13.7811	13.6755	13.7211	13.8835	13.2273	13.3718	13.6544	13.2759	13.3267	13.5695	13.3452	13.3614	13.6058	13.3225	13.4958	13.4317	13.3385
2	M2 UpD0-D3.6h IRF4_Induced NFkB_Signalling	RPL4	48.4848	14.1052	14.2116	13.9515	14.1734	14.1755	14.0291	14.1501	14.1035	13.7979	14.0354	14.1221	14.1405	13.8275	14.0043	13.5888	13.8581	13.9808	13.6362	13.817	13.8779	13.4591	13.8866	13.8705	13.7791
2	M2 UpD0-D3.6h IRF4_Induced NFkB_Signalling	RPSAP49	48.4848	13.8891	14.3553	14.2793	14.181	14.1465	14.3024	14.5056	14.1052	13.8197	14.2274	14.181	13.8072	13.8504	14.1673	13.8197	13.9375	14.1425	13.8365	14.007	13.9871	13.8606	13.8421	13.7058	13.4792
2	M2 UpD0-D3.6h IRF4_Induced NFkB_Signalling	ZNF585A	48.4848	9.06448	9.35859	9.34441	9.15534	9.15564	9.15184	9.08814	8.75364	8.79103	8.97549	9.08616	8.73264	8.85839	8.86379	8.67216	8.79447	9.06015	8.80968	8.80105	8.80658	8.61935	8.90516	8.86941	8.62722
2	M2 UpD0-D3.6h IRF4_Induced NFkB_Signalling	DLST	47.4747	10.2621	10.3089	9.78785	10.213	10.4333	9.91944	11.1875	10.4235	9.76518	10.207	10.0562	9.74027	10.1299	10.0845	9.77331	10.2227	10.03	9.5	10.0047	9.75586	9.51389	9.65646	9.79579	9.36658
2	M2 UpD0-D3.6h IRF4_Induced NFkB_Signalling	SNAPC4	47.4747	10.3093	10.4694	10.7118	10.2748	11.1367	10.421	10.1949	10.7864	10.3982	10.0455	10.701	10.1808	10.1008	10.5453	10.0595	10.094	10.7303	10.2047	10.0742	10.5905	10.0181	9.55408	10.4891	9.89871
2	M2 UpD0-D3.6h IRF4_Induced NFkB_Signalling	YBX3	47.4747	12.4972	13.7697	12.7335	12.9891	13.697	13.1871	12.6676	13.3655	13.0813	12.9158	13.2532	12.6471	12.4997	13.233	12.0771	12.8265	13.4958	12.3459	12.3329	13.1267	11.9787	12.1437	12.9595	11.8433
2	M2 UpD0-D3.6h IRF4_Induced NFkB_Signalling	YBX3P1	47.4747	9.79067	11.5075	10.0564	10.1163	10.9472	10.374	10.7206	10.4348	10.3387	9.89223	10.3677	9.79247	9.61164	10.4429	9.5688	9.60627	10.7754	9.80045	9.69303	10.448	9.46051	9.48847	10.1994	9.17045
2	M2 UpD0-D3.6h IRF4_Induced NFkB_Signalling	IGFLR1	46.4646	10.3376	10.962	10.4727	10.6254	11.059	10.5298	11.0348	11.2756	10.5634	10.7315	11.2089	10.6069	10.1959	11.0505	10.3803	9.99932	10.9128	9.95534	9.8551	10.9056	9.86849	9.92168	10.7458	9.87648
2	M2 UpD0-D3.6h IRF4_Induced NFkB_Signalling	KCNH8	46.4646	9.20476	9.4552	9.45191	8.04659	8.19918	8.29151	9.16817	8.15835	8.13955	8.25279	8.18848	8.09066	8.25433	8.04793	8.19897	8.17989	8.18501	8.13892	8.26459	8.22902	8.03931	8.20073	8.25043	8.12152
2	M2 UpD0-D3.6h IRF4_Induced NFkB_Signalling	MPV17	46.4646	10.4622	10.701	10.4436	10.7407	11.0419	10.5976	11.9541	11.1832	10.6229	10.4342	10.8514	10.5607	10.4055	10.8594	10.3854	10.4008	10.8402	10.4884	10.3672	10.8918	10.4813	10.5099	10.8509	10.3654
2	M2 UpD0-D3.6h IRF4_Induced NFkB_Signalling	RELB	46.4646	9.29728	9.66877	9.2493	9.07903	9.32321	8.95081	10.406	8.97652	9.08718	8.96864	8.45658	8.54278	8.53896	8.38705	8.39212	8.42397	8.39039	8.28999	8.24068	8.56256	8.33775	8.42726	8.37809	8.23612
2	M2 UpD0-D3.6h IRF4_Induced NFkB_Signalling	RENBP	46.4646	9.21306	9.62073	9.24318	9.68954	10.1295	9.48515	10.2082	9.8751	9.37013	9.26057	9.86025	9.19787	8.80495	9.46165	8.98924	8.60277	9.50912	8.81957	8.50784	9.70458	8.61281	8.55094	9.59488	8.48734
2	M2 UpD0-D3.6h IRF4_Induced NFkB_Signalling	HIVEP1	45.4545	9.05213	8.89351	9.00131	8.79601	9.07439	8.9995	9.11877	8.95774	9.63516	9.09031	8.61661	9.07317	8.70256	8.42848	8.85018	8.54076	8.40214	8.64785	8.35965	8.2942	8.60318	8.59388	8.37555	8.52873
2	M2 UpD0-D3.6h IRF4_Induced NFkB_Signalling	AGAP10P	44.4444	10.7325	10.5183	10.6115	10.2909	10.2222	10.1499	10.9965	10.2027	10.1442	10.2388	10.2217	10.146	10.1232	10.0212	10.0954	10.0995	10.0006	9.92429	10.2992	10.0346	9.86136	10.4198	10.034	10.1956
2	M2 UpD0-D3.6h IRF4_Induced NFkB_Signalling	CD40	44.4444	10.1808	10.9373	10.2376	10.1744	10.0584	9.75129	11.178	9.38044	9.41186	9.71733	9.27464	9.1906	9.34979	9.03155	9.19009	8.99243	9.12877	9.09254	8.46134	8.77785	8.57167	8.43622	8.53545	8.32549
2	M2 UpD0-D3.6h IRF4_Induced NFkB_Signalling	EIF1	44.4444	13.3881	13.4792	13.8048	13.4681	13.5579	13.3344	13.5262	12.5904	12.9089	12.8593	12.519	12.0498	12.8076	12.4286	12.3537	12.6344	12.4806	12.4544	12.3693	12.4615	12.2496	12.418	12.2804	12.127
2	M2 UpD0-D3.6h IRF4_Induced NFkB_Signalling	FAM69B	44.4444	9.6477	8.21815	9.6287	8.31795	8.17416	8.81657	8.45506	8.04022	8.44106	8.13558	8.05955	8.24159	8.10886	8.05112	8.17603	8.02522	7.94461	8.13273	7.96536	7.88893	8.0769	8.04497	8.05212	7.93527
2	M2 UpD0-D3.6h IRF4_Induced NFkB_Signalling	GCNT2	44.4444	9.25033	9.43748	9.15836	8.67499	8.54217	8.40214	8.56048	8.34067	8.36717	8.32862	8.29733	8.24364	8.20791	8.15328	8.3632	8.17425	8.18588	8.3157	8.14245	8.11941	8.12417	8.08623	8.05683	8.19711
2	M2 UpD0-D3.6h IRF4_Induced NFkB_Signalling	IFT43	44.4444	9.14215	9.11121	9.09334	9.26843	9.1396	9.06426	9.33237	8.93994	8.9257	8.97596	8.87928	8.96802	8.88611	8.69277	8.82548	8.66015	8.67437	8.52035	8.72999	8.61543	8.60849	8.8417	8.65225	8.49403
2	M2 UpD0-D3.6h IRF4_Induced NFkB_Signalling	INPP5E	44.4444	9.25759	9.59739	9.76927	9.1739	9.10761	9.01937	9.17668	9.00839	9.32099	8.95178	8.92372	9.01673	8.8325	8.61625	8.99048	8.67838	8.63659	8.88064	8.59424	8.50622	8.72257	8.56427	8.54759	8.7078
2	M2 UpD0-D3.6h IRF4_Induced NFkB_Signalling	LOC100133609	44.4444	9.37814	10.146	9.49312	9.52051	9.19058	9.28007	10.3696	8.84198	9.03345	8.98586	8.73136	8.7178	8.69489	8.7324	8.90731	8.63639	8.66499	8.52776	8.74809	8.44414	8.41084	8.58311	8.61729	8.37563
2	M2 UpD0-D3.6h IRF4_Induced NFkB_Signalling	LOC729742	44.4444	13.215	13.5866	12.9268	13.3755	13.1937	12.9983	14.0529	12.8762	12.4261	12.8299	13.0883	12.3798	12.6575	12.6162	12.1022	12.3879	12.4167	12.1668	12.6983	12.3178	12.0624	12.8392	12.0161	12.0925
2	M2 UpD0-D3.6h IRF4_Induced NFkB_Signalling	MAPK3	44.4444	10.4204	11.1927	10.5373	10.5008	10.2733	10.3671	11.1028	10.2758	10.4401	10.4574	10.2462	10.1621	10.1147	10.383	9.95564	10.0238	10.1943	9.74586	10.0937	10.0947	9.67412	10.0955	9.87745	9.64418
2	M2 UpD0-D3.6h IRF4_Induced NFkB_Signalling	OFD1	44.4444	10.2533	10.4093	10.6334	9.43382	8.97507	9.36073	9.70176	8.96791	9.67265	9.39671	8.97731	9.65992	9.10635	8.89036	9.5994	8.83596	8.89637	9.43066	8.91873	8.85142	8.91547	8.9423	8.71619	8.88758
2	M2 UpD0-D3.6h IRF4_Induced NFkB_Signalling	RNF130	44.4444	9.61822	9.45716	9.23874	8.76537	8.75716	8.73877	9.78686	8.70584	8.93715	8.68591	8.58207	8.77375	8.62056	8.69183	8.7801	8.64285	8.34481	8.5434	8.77613	8.56722	8.54608	8.71112	8.40706	8.41714
2	M2 UpD0-D3.6h IRF4_Induced NFkB_Signalling	RPL12	44.4444	13.4919	13.7841	13.5027	13.866	13.817	13.6497	14.3298	13.5605	13.083	13.7593	13.5888	13.0848	13.4566	13.3577	12.8265	13.249	13.1582	12.8748	13.349	13.1671	12.9254	13.7697	13.0345	12.9106
2	M2 UpD0-D3.6h IRF4_Induced NFkB_Signalling	RPS10P3	44.4444	9.06794	9.392	9.02543	8.95405	8.82677	8.75177	9.69507	8.85037	8.62141	8.82677	9.10656	8.61497	8.56562	8.77934	8.65889	8.64589	8.62535	8.59098	8.88368	8.63237	8.60345	8.91113	8.53333	8.61505
2	M2 UpD0-D3.6h IRF4_Induced NFkB_Signalling	RPS2P48	44.4444	13.7035	14.1776	14.0931	13.9348	13.8912	14.0116	14.3646	13.9808	13.7013	13.6608	14.0718	13.9295	13.5048	13.7896	13.762	13.5624	13.6519	13.5529	13.8275	13.4939	13.7499	13.8779	13.3101	13.5048
2	M2 UpD0-D3.6h IRF4_Induced NFkB_Signalling	RPS2P51	44.4444	13.6895	14.0331	13.7083	13.7841	13.9375	13.5288	14.2258	14.007	13.4047	13.7396	13.9448	13.6316	13.3614	13.697	13.4768	13.3101	13.4429	13.2833	13.8338	13.3077	13.3941	13.7923	13.1363	13.5822
2	M2 UpD0-D3.6h IRF4_Induced NFkB_Signalling	WDR48	44.4444	9.49514	9.71885	9.92501	9.5883	9.79955	9.66944	9.42084	9.34862	9.32868	9.34125	9.29144	9.38632	9.35953	9.21141	9.32452	9.08124	9.08558	9.26367	8.84504	9.13747	9.31144	9.02021	9.23304	9.39956
2	M2 UpD0-D3.6h IRF4_Induced NFkB_Signalling	ZBTB17	44.4444	9.60832	9.56265	9.48422	9.70721	9.57255	9.64058	10.0815	9.73443	9.60326	9.44923	9.6327	9.49175	9.1524	9.49602	9.30673	8.99563	9.54798	9.27855	9.0763	9.51006	9.25574	9.00869	9.29159	9.23884
2	M2 UpD0-D3.6h IRF4_Induced NFkB_Signalling	ACCS	43.4343	10.3176	9.44669	9.60262	8.91642	8.61065	8.51778	8.79427	8.35247	8.3188	8.62704	8.38151	8.35129	8.69933	8.2714	8.46047	8.57571	8.32531	8.32901	8.55636	8.34679	8.11863	8.97186	8.20843	8.16571
2	M2 UpD0-D3.6h IRF4_Induced NFkB_Signalling	CAPG	43.4343	9.08303	8.88694	8.9468	9.10852	8.50317	9.09744	11.1003	8.64129	9.23969	8.88127	8.7569	9.08824	8.84846	8.78957	9.2578	8.66294	8.82089	9.0708	8.34937	8.70084	8.84953	8.24995	8.37061	8.61135
2	M2 UpD0-D3.6h IRF4_Induced NFkB_Signalling	LOC286367	43.4343	10.0705	9.17121	9.72867	9.26158	9.14749	9.06044	8.96791	8.91631	8.5684	8.80076	8.92829	8.85923	8.94945	8.6169	8.69621	8.72271	8.6383	8.57599	8.72799	8.45466	8.38491	8.78716	8.61121	8.34649
2	M2 UpD0-D3.6h IRF4_Induced NFkB_Signalling	RPL14P1	43.4343	13.6066	13.5605	13.7104	13.4993	13.4806	13.6616	14.0752	13.3897	13.2643	13.4294	13.4436	13.4804	13.269	13.2017	13.0691	13.1226	13.2037	13.0727	13.4259	13.0836	13.026	13.401	12.9553	13.0563
2	M2 UpD0-D3.6h IRF4_Induced NFkB_Signalling	RPS28P6	43.4343	13.9636	14.2726	14.2694	13.99	13.99	13.9536	13.6185	13.5135	13.473	13.7667	13.4919	13.27	13.8228	13.2759	13.1248	13.4981	13.3471	13.0973	13.5262	13.2252	13.0615	13.5716	12.9434	12.8695
2	M2 UpD0-D3.6h IRF4_Induced NFkB_Signalling	RPS4XP13	43.4343	9.66366	10.0486	10.0478	9.58335	9.29428	9.21306	9.30184	9.33642	9.22173	9.32657	9.33773	9.30698	9.29159	9.13409	9.33745	9.35994	9.11811	9.11479	9.21446	9.09224	9.10347	9.6734	9.14338	9.08664
2	M2 UpD0-D3.6h IRF4_Induced NFkB_Signalling	LOC645515	42.4242	10.6394	10.5514	10.456	10.4066	10.2791	10.3895	12.5103	10.0495	10.1876	10.1751	9.89608	10.0137	10.0713	10.0073	9.83895	10.207	9.68063	9.81863	9.93572	9.5425	9.57189	9.63819	9.35299	9.34525
2	M2 UpD0-D3.6h IRF4_Induced NFkB_Signalling	MNDA	42.4242	8.97631	8.54774	9.02732	9.37437	8.5083	9.21987	9.24646	8.16873	8.71001	8.99104	8.20365	8.41245	8.85281	8.13656	8.48187	8.51352	8.19212	8.63371	8.03457	8.12899	8.25161	7.95145	8.05754	8.16867
2	M2 UpD0-D3.6h IRF4_Induced NFkB_Signalling	NFATC1	42.4242	8.82117	8.79607	9.18915	8.99101	8.69577	9.09242	9.93167	8.54325	9.22329	8.6572	8.53207	8.69833	8.39375	8.43951	8.66729	8.35899	8.30655	8.39615	8.34323	8.37886	8.25569	8.31118	8.32915	8.27169
2	M2 UpD0-D3.6h IRF4_Induced NFkB_Signalling	PABPC4	42.4242	12.2409	11.9803	11.9018	11.9314	12.6448	12.1125	13.5984	12.5836	12.4213	12.0009	12.2074	12.1922	11.6648	11.6398	11.7604	11.6258	11.8177	11.75	11.5965	11.7594	11.8538	11.5667	11.6776	11.839
2	M2 UpD0-D3.6h IRF4_Induced NFkB_Signalling	SH3KBP1	42.4242	11.9885	11.6822	11.6887	11.9853	11.6284	11.8376	12.1243	11.4018	11.7998	11.6686	11.277	11.66	11.2979	10.9248	11.3497	11.0018	10.8806	11.3253	10.5309	10.7875	10.9656	10.7537	10.8102	10.7411
2	M2 UpD0-D3.6h IRF4_Induced NFkB_Signalling	SLC15A3	42.4242	12.3249	12.2123	12.1302	11.6127	11.4691	11.2619	11.7147	10.9406	11.141	11.4762	10.8263	10.9712	11.0882	10.7503	10.9252	10.7744	10.6308	10.6011	10.6378	10.4375	9.96974	10.7453	10.0062	9.71204
2	M2 UpD0-D3.6h IRF4_Induced NFkB_Signalling	SMAP2	42.4242	12.4093	12.5888	12.316	12.1215	12.1517	12.1669	12.1912	11.811	12.0841	11.9684	11.4949	11.705	11.7688	11.6015	11.6526	11.6782	11.7268	11.6129	11.5297	11.5539	11.4724	11.8629	11.4759	11.4681
2	M2 UpD0-D3.6h IRF4_Induced NFkB_Signalling	ELMSAN1	41.4141	10.3115	10.0586	10.0336	10.1327	9.8717	9.89996	10.054	9.49361	9.91143	9.80228	9.39585	9.66536	9.77714	9.54287	9.69998	9.61821	9.43058	9.54459	9.16688	9.35921	9.24316	8.95827	9.23309	9.15535
2	M2 UpD0-D3.6h IRF4_Induced NFkB_Signalling	LOC100129034	41.4141	10.4499	9.26033	9.67152	8.8588	8.5439	8.61631	9.46805	8.26806	8.54759	8.79016	8.44545	8.61906	8.69032	8.2918	8.74546	8.45684	8.17873	8.50813	8.24725	8.18925	8.22704	8.40621	8.15095	8.17255
2	M2 UpD0-D3.6h IRF4_Induced NFkB_Signalling	MCCC1	41.4141	10.6073	10.7718	10.4643	10.6854	10.5551	10.3202	10.4239	9.9572	10.1594	10.3982	10.0644	10.1095	10.406	9.88042	10.2157	10.1389	10.0383	10.1481	9.8972	9.96232	9.913	10.0866	9.95493	9.71824
2	M2 UpD0-D3.6h IRF4_Induced NFkB_Signalling	RXRB	41.4141	11.5568	11.4266	11.3736	10.4799	10.6505	10.3409	10.7317	11.2784	10.5016	10.78	10.7899	10.691	10.6467	10.7114	10.3794	10.4436	10.7859	10.4486	10.5172	10.8602	10.3755	10.8326	10.7864	10.4673
2	M2 UpD0-D3.6h IRF4_Induced NFkB_Signalling	ADARB1	40.404	10.7356	11.385	11.024	9.19981	9.55367	9.49839	9.16278	8.74926	9.29168	8.82813	8.57901	8.81241	8.75558	8.80872	8.75544	8.63149	8.69247	8.67929	8.35927	8.61002	8.45123	8.36022	8.48751	8.32729
2	M2 UpD0-D3.6h IRF4_Induced NFkB_Signalling	ADGRE5	40.404	10.8956	10.2876	10.5314	11.1059	10.8119	10.8014	12.429	10.9173	10.874	10.9283	10.5896	10.6606	10.3	10.5292	10.5122	10.1061	10.5067	10.5367	9.99513	10.5037	10.3735	10.1555	10.3726	10.4504
2	M2 UpD0-D3.6h IRF4_Induced NFkB_Signalling	CCR9	40.404	8.61681	8.47827	8.57984	8.10376	8.15285	8.1161	8.17401	8.06012	8.1657	8.25466	8.25466	8.16703	8.07079	8.10264	8.1055	8.20685	8.13854	8.10592	8.16396	8.20113	8.14495	8.04585	8.22289	8.19058
2	M2 UpD0-D3.6h IRF4_Induced NFkB_Signalling	HS.489254	40.404	9.45282	9.29874	9.21446	9.98849	9.17131	9.69407	10.4786	9.48969	9.50365	9.60686	9.21435	9.73619	9.16214	9.23718	9.32792	9.16978	9.23099	9.43547	9.09206	9.19832	9.41844	9.06568	8.87796	9.24953
2	M2 UpD0-D3.6h IRF4_Induced NFkB_Signalling	RPS4XP11	40.404	9.42551	9.88319	9.64984	9.27044	8.96813	8.96512	9.20456	9.09187	8.91892	9.10219	9.12329	8.9127	9.11904	9.12582	9.02567	9.03603	8.94316	8.73349	9.09068	8.99533	8.73177	9.14449	9.06176	8.92773
2	M2 UpD0-D3.6h IRF4_Induced NFkB_Signalling	FBL	39.3939	13.0544	13.3845	13.0615	13.2549	13.5224	13.0813	13.7647	13.4479	12.76	13.3285	13.4749	12.8762	13.083	13.1854	12.6274	13.1096	13.0041	12.4555	13.0601	13.0973	12.6417	12.7084	12.7718	12.6344
2	M2 UpD0-D3.6h IRF4_Induced NFkB_Signalling	LYSMD2	39.3939	12.4793	12.3583	12.2774	11.8068	10.2752	10.9884	11.094	10.615	11.4045	12.0179	10.2715	11.3852	11.2019	9.57892	10.9472	10.6304	9.40807	10.5523	9.27004	9.24921	9.63241	8.54271	8.70446	8.76317
2	M2 UpD0-D3.6h IRF4_Induced NFkB_Signalling	PARP14	39.3939	11.2575	11.0955	10.6956	10.2451	9.79725	9.96326	10.0189	9.73131	10.3634	10.6208	9.81159	10.2405	10.1319	9.92609	10.0425	10.0377	9.54146	10.1546	9.59431	9.46431	9.72241	9.41164	9.21034	9.47218
2	M2 UpD0-D3.6h IRF4_Induced NFkB_Signalling	POLR1D	39.3939	11.2622	11.4265	11.2276	11.7653	11.8448	11.4428	11.7083	11.3334	11.0076	11.5157	11.4486	11.1194	11.3803	11.2526	10.9028	11.3992	11.2808	10.8885	11.2022	11.2203	10.9	11.1278	11.017	10.7726
2	M2 UpD0-D3.6h IRF4_Induced NFkB_Signalling	RPL12P32	39.3939	13.184	13.5331	13.2169	13.3887	13.1411	13.1726	14.025	12.8735	12.7369	13.0677	12.8782	12.7038	12.7053	12.4859	12.4359	12.5543	12.3285	12.3917	12.9191	12.3003	12.4183	13.2133	12.2113	12.4516
2	M2 UpD0-D3.6h IRF4_Induced NFkB_Signalling	UBAC2	39.3939	10.8496	10.94	10.6027	9.83743	9.74806	9.8551	9.53253	9.54061	9.44871	9.8485	9.41901	9.5296	9.58077	9.46921	9.31983	9.37776	9.35453	9.21501	9.18204	9.37024	9.02913	9.38751	9.26953	8.97429
2	M2 UpD0-D3.6h IRF4_Induced NFkB_Signalling	LOC648771	38.3838	13.7546	14.1865	13.6734	13.9375	13.7593	13.7166	14.1251	13.6058	13.7211	13.7449	13.6388	13.6362	13.3881	13.4093	13.3017	13.2209	13.2408	12.9873	13.4317	13.138	13.243	13.6778	12.8748	13.211
2	M2 UpD0-D3.6h IRF4_Induced NFkB_Signalling	NDUFA6	38.3838	10.5467	10.7162	10.366	10.7034	10.0047	10.0797	11.2691	10.2795	10.213	10.877	10.5595	10.3601	10.7726	10.3895	10.3452	10.6664	10.1156	10.3335	10.7275	10.0626	10.0518	10.4501	10.0265	9.91619
2	M2 UpD0-D3.6h IRF4_Induced NFkB_Signalling	RPL29P6	38.3838	10.5261	10.432	10.2506	10.8457	9.74665	9.79296	13.2617	10.0911	9.65267	10.7275	10.0399	9.74907	10.1986	9.70674	9.45536	10.1518	9.42748	9.36706	10.3258	9.56994	9.43356	10.3205	9.37024	9.69459
2	M2 UpD0-D3.6h IRF4_Induced NFkB_Signalling	ZNF770	38.3838	10.3852	10.0318	10.0954	9.86153	9.81055	9.70038	9.78773	9.85884	9.67597	9.93079	9.66456	9.70566	9.79743	9.66042	9.40881	9.79496	9.625	9.49616	9.66546	9.64756	9.53169	9.84586	9.62415	9.7234
2	M2 UpD0-D3.6h IRF4_Induced NFkB_Signalling	COA1	37.3737	10.9823	11.7197	10.9247	11.75	12.0083	11.5863	12.4261	11.6265	11.1532	11.6681	11.6575	11.184	11.3392	11.1869	10.9169	11.2065	11.1327	10.8599	11.4178	11.0914	10.8877	11.4754	10.9935	10.8988
2	M2 UpD0-D3.6h IRF4_Induced NFkB_Signalling	PEX11B	37.3737	11.6776	11.4403	11.2194	11.0132	11.1863	10.7798	11.2089	11.4617	10.6005	11.0932	11.3357	11.1015	10.8906	11.0738	10.8155	10.6271	10.9259	10.7159	10.4799	11.1269	10.7138	11.1099	11.113	11.0847
2	M2 UpD0-D3.6h IRF4_Induced NFkB_Signalling	ZNF767P	37.3737	9.97439	9.50472	9.68731	8.75979	9.00473	8.43081	10.0314	9.02555	8.67465	8.84417	9.21295	8.75607	8.83427	8.83737	8.71787	8.7396	8.88748	8.57589	8.68207	9.06994	8.61869	8.85942	8.99173	8.65611
2	M2 UpD0-D3.6h IRF4_Induced NFkB_Signalling	C1orf228	36.3636	9.1088	9.53033	9.80529	9.20384	9.02682	9.43382	9.14206	8.95888	9.12893	8.91322	8.66644	8.855	8.38129	8.38831	8.62333	8.11182	8.45093	8.61455	7.975	8.44595	8.27318	8.03755	8.29014	8.11447
2	M2 UpD0-D3.6h IRF4_Induced NFkB_Signalling	CHCHD7	36.3636	11.0339	10.9733	10.8785	10.0869	10.1391	9.91523	10.2592	9.83881	9.70244	10.0663	10.0995	9.43498	10.0222	9.81159	9.72658	10.1632	9.94586	9.92054	10.2724	9.99307	9.74806	10.2152	9.95672	9.84107
2	M2 UpD0-D3.6h IRF4_Induced NFkB_Signalling	DENND2D	36.3636	10.6595	10.7442	10.4967	10.0396	10.1116	10.2994	9.78834	9.5	9.84529	9.44259	9.42331	9.86733	9.07036	9.51644	9.80045	8.90932	9.29409	9.37326	8.26113	9.13875	8.82528	8.54712	8.85068	8.73867
2	M2 UpD0-D3.6h IRF4_Induced NFkB_Signalling	KLF4	36.3636	8.09531	9.6889	9.12786	8.28594	8.14478	8.69138	8.13901	7.9977	8.50345	8.18945	8.06209	8.12002	7.87568	7.86156	7.88527	7.90924	7.8755	7.87056	7.82376	7.9475	8.00571	7.88153	7.85879	7.89527
2	M2 UpD0-D3.6h IRF4_Induced NFkB_Signalling	LOC653066	36.3636	9.23177	9.64012	9.19099	8.44291	8.48883	8.39838	8.53627	9.23547	8.43629	9.02431	8.91339	8.69988	8.45799	8.59929	8.40982	8.49873	8.30989	8.31354	8.58219	8.54245	8.35001	8.36575	8.54454	8.47492
2	M2 UpD0-D3.6h IRF4_Induced NFkB_Signalling	MC1R	36.3636	9.19058	8.70446	8.97985	8.56145	8.56421	8.53627	8.83172	9.32343	8.90545	9.15278	9.35738	8.9251	8.69978	8.92581	8.78173	8.77724	8.99361	8.81226	8.66433	8.78957	8.51891	8.86328	8.9247	8.61666
2	M2 UpD0-D3.6h IRF4_Induced NFkB_Signalling	MYL5	36.3636	9.29533	9.89526	10.2936	9.44724	9.41611	9.66555	9.34194	9.2179	9.50497	9.02092	9.24792	9.36369	8.91547	8.9332	9.22242	8.73635	8.78148	9.18479	8.42526	8.78373	8.87684	8.48128	8.70162	8.74899
2	M2 UpD0-D3.6h IRF4_Induced NFkB_Signalling	PKNOX1	36.3636	9.87612	9.55726	9.57643	8.77155	9.10506	8.85375	9.39671	9.78618	9.3272	9.60341	9.66877	9.44591	9.36006	9.44273	9.16518	9.228	9.42203	9.12073	9.07151	9.43187	9.18159	9.28445	9.42114	9.20804
2	M2 UpD0-D3.6h IRF4_Induced NFkB_Signalling	RAB40C	36.3636	11.2113	11.1567	11.1494	10.0495	10.5252	10.3013	10.8651	11.3817	10.8901	10.9444	11.2926	10.8795	10.7658	11.2465	10.6566	10.5964	11.0614	10.7369	10.6133	10.9462	10.4329	10.6886	10.9847	10.5111
2	M2 UpD0-D3.6h IRF4_Induced NFkB_Signalling	RPL7AP39	36.3636	8.6612	9.09935	9.14186	8.8345	8.7748	8.98122	9.0098	8.76162	8.95369	8.81782	8.92744	8.68821	8.72373	8.53896	8.73136	8.65903	8.72054	8.61371	8.61594	8.68276	8.67946	8.60835	8.70053	8.62445
2	M2 UpD0-D3.6h IRF4_Induced NFkB_Signalling	SH2B3	36.3636	11.3921	10.8088	11.2065	10.6685	10.9083	10.7967	10.6341	10.3278	10.7972	10.5525	10.1357	10.5581	10.2632	10.4461	10.674	10.1557	10.1643	10.5243	9.47607	9.65385	9.75858	9.80403	9.52022	9.22547
2	M2 UpD0-D3.6h IRF4_Induced NFkB_Signalling	TRIM22	36.3636	11.6503	11.5285	11.7307	10.0094	9.994	10.2826	9.96558	9.57461	10.1012	9.62291	9.60023	10.005	9.40156	9.26854	9.70816	9.0161	9.52307	9.81459	8.47357	9.24859	8.86624	8.24367	8.76546	8.47861
2	M2 UpD0-D3.6h IRF4_Induced NFkB_Signalling	XAF1	36.3636	10.9222	10.7895	11.2413	9.03511	8.9147	9.1543	8.77586	8.84596	9.10063	9.01214	8.74637	8.80801	8.69884	8.72157	8.93945	8.6824	8.71586	8.76816	8.67505	8.79648	8.64471	8.50456	8.63091	8.48917
2	M2 UpD0-D3.6h IRF4_Induced NFkB_Signalling	ZNF653	36.3636	9.88719	9.74936	9.6706	9.39031	9.21975	9.10075	9.3251	9.97803	9.51644	9.82619	9.83263	9.6746	9.49021	9.7383	9.31313	9.37908	9.515	9.27004	9.55436	9.6397	9.15099	9.52932	9.45116	9.22057
2	M2 UpD0-D3.6h IRF4_Induced NFkB_Signalling	PAIP1	35.3535	8.79545	8.89148	8.91448	8.48606	8.45191	8.66742	9.51172	8.28685	8.50849	8.47288	8.40294	8.52655	8.47299	8.34857	8.52655	8.38059	8.35219	8.53108	8.37085	8.23639	8.36916	8.33295	8.41881	8.3458
2	M2 UpD0-D3.6h IRF4_Induced NFkB_Signalling	PSMG4	35.3535	9.31931	9.95179	9.60213	10.6131	10.4509	10.0318	10.1596	9.69698	9.46486	9.93326	9.65214	9.09269	9.67875	9.40759	9.02671	9.88189	9.44803	9.202	9.66257	9.43295	9.15982	9.34758	9.18773	8.99274
2	M2 UpD0-D3.6h IRF4_Induced NFkB_Signalling	SKP2	35.3535	9.30959	9.41123	9.37437	9.83675	10.1488	9.77213	10.0055	9.22736	9.21435	9.35994	9.39738	8.81203	9.09963	8.91339	8.71556	9.25062	9.09117	8.68984	9.52391	9.16978	8.94866	9.21162	9.16183	8.73711
2	M2 UpD0-D3.6h IRF4_Induced NFkB_Signalling	SNHG1	35.3535	11.7956	12.0279	12.2827	12.2879	12.5518	12.0036	12.7745	12.0445	11.7851	12.1324	11.9936	11.6511	12.0298	11.7232	11.606	12.4076	11.8819	11.595	12.539	11.9624	11.8117	11.8565	11.7455	11.7426
2	M2 UpD0-D3.6h IRF4_Induced NFkB_Signalling	ACYP1	34.3434	10.5298	10.1021	10.2457	10.7807	10.7283	10.4613	10.4488	10.4262	10.1677	10.3585	10.4377	9.99171	10.5157	10.1614	9.98795	10.2539	10.0695	9.89832	10.0869	10.0403	9.87922	10.1565	9.92845	9.65105
2	M2 UpD0-D3.6h IRF4_Induced NFkB_Signalling	ALDOC	34.3434	10.9841	11.4862	11.0164	12.3094	12.5505	12.6676	12.5215	12.2246	12.3459	12.2651	12.2	12.2455	11.0054	11.1649	11.0198	10.256	10.6786	10.485	11.3092	11.0894	10.0335	12.3495	10.4053	9.75736
2	M2 UpD0-D3.6h IRF4_Induced NFkB_Signalling	CLPX	34.3434	10.0274	10.5875	10.2157	10.5698	10.5587	10.6131	10.1826	10.1346	10.3228	10.432	10.2084	10.2851	10.1481	9.73666	10.0245	10.0932	9.89557	9.9084	10.2111	9.88255	10.0866	10.4419	10.1546	10.1157
2	M2 UpD0-D3.6h IRF4_Induced NFkB_Signalling	DDIT3	34.3434	8.77034	9.20615	9.16214	9.62989	9.46882	9.70904	10.2454	9.19937	9.33175	9.46683	9.17023	8.99685	9.34282	8.98278	8.91429	8.99645	9.00684	8.78257	9.2448	8.85759	8.94421	9.54335	8.78899	9.01264
2	M2 UpD0-D3.6h IRF4_Induced NFkB_Signalling	DMAP1	34.3434	11.3721	11.2827	11.2035	10.2756	10.4583	10.2167	10.5535	10.9615	10.2734	10.6273	11.0352	10.7778	10.5348	10.7534	10.3713	10.4582	10.7038	10.4329	10.5006	10.8312	10.3809	10.5259	10.7541	10.5241
2	M2 UpD0-D3.6h IRF4_Induced NFkB_Signalling	HABP4	34.3434	9.01206	8.80294	8.72132	9.17195	9.04233	9.07732	9.98594	8.7937	8.97093	8.92346	8.67823	8.66722	9.0041	8.93133	8.73289	8.94291	8.49092	8.66528	9.04146	8.45039	8.5035	9.04941	8.38735	8.31968
2	M2 UpD0-D3.6h IRF4_Induced NFkB_Signalling	HNRNPDL	34.3434	10.7849	10.7029	11.1068	11.4936	11.1389	10.8306	11.587	10.622	10.4817	11.0227	10.2592	10.3056	10.8975	9.98312	9.84191	10.8165	10.1213	10.0442	10.922	9.96355	9.96394	10.975	10.2424	10.1197
2	M2 UpD0-D3.6h IRF4_Induced NFkB_Signalling	OLMALINC	34.3434	8.2291	8.38192	8.25948	8.62007	8.75884	8.70593	8.50705	8.2867	8.48718	8.19751	8.16695	8.21346	8.02248	8.07766	8.11447	8.0802	8.08433	8.02662	8.38686	8.06621	8.11329	8.81445	8.11059	8.00418
2	M2 UpD0-D3.6h IRF4_Induced NFkB_Signalling	RGS1	34.3434	8.71201	11.1904	9.71158	12.3573	11.5754	12.3774	12.1974	10.6871	10.6823	10.7945	10.4564	10.0457	10.2343	9.56093	9.54947	9.7234	9.52037	8.9863	9.48721	9.03893	8.73118	10.7161	9.59675	8.72799
2	M2 UpD0-D3.6h IRF4_Induced NFkB_Signalling	RSL24D1	34.3434	13.1075	13.1871	12.9854	13.4758	13.7396	13.6778	13.8098	13.3267	13.235	13.4501	13.3698	13.0709	13.1808	12.72	12.6704	13.2508	12.9834	12.6983	13.3344	12.8153	12.7832	13.6081	12.7367	12.6894
2	M2 UpD0-D3.6h IRF4_Induced NFkB_Signalling	SLC25A26	34.3434	8.93187	9.07198	8.95644	9.18159	9.27921	9.18402	9.72542	9.3373	9.23678	9.26542	9.31833	9.13128	8.96442	8.88928	8.88884	9.02422	8.9336	8.8325	9.18067	8.94308	8.84887	8.99133	8.7	8.69679
2	M2 UpD0-D3.6h IRF4_Induced NFkB_Signalling	TBC1D16	34.3434	8.33922	8.42013	8.43325	8.85345	9.39002	9.00101	9.06481	8.93734	8.77879	8.7709	8.81124	8.51352	8.43061	8.43017	8.30858	8.54877	8.39589	8.2529	8.48938	8.46356	8.31585	8.93256	8.34137	8.15468
2	M2 UpD0-D3.6h IRF4_Induced NFkB_Signalling	TCEAL4	34.3434	10.4609	10.1024	10.0769	10.6573	10.4265	10.4472	10.3783	9.78593	9.85073	10.3114	9.88673	9.69064	10.1448	9.617	9.57594	9.96988	9.35936	9.42711	9.96714	9.35802	9.21624	9.96939	9.34546	9.1916
2	M2 UpD0-D3.6h IRF4_Induced NFkB_Signalling	TIMM9	34.3434	10.3239	10.9831	10.5531	11.3068	11.1055	11.0042	11.0667	10.3923	10.8532	10.7283	10.3788	10.3363	10.4685	10.1538	10.2073	10.6133	10.4303	10.2005	10.7362	10.392	10.4677	10.6846	10.4352	10.5172
2	M2 UpD0-D3.6h IRF4_Induced NFkB_Signalling	TNFSF13B	34.3434	8.89945	9.0456	8.8269	9.61741	9.3739	9.61165	9.4051	8.87095	9.06966	9.4893	8.94644	9.16346	9.24132	8.77024	8.76369	8.72802	8.63708	8.60182	8.79556	8.69438	8.5665	9.14545	9.00551	8.73416
2	M2 UpD0-D3.6h IRF4_Induced NFkB_Signalling	TNFSF9	34.3434	8.30611	8.29321	8.45747	9.06111	8.6449	8.89703	9.27207	8.36527	8.53576	8.44078	8.32437	8.27551	8.36695	8.3681	8.37225	8.20895	8.33823	8.12849	8.29147	8.20033	8.19856	8.29866	8.4044	8.1699
2	M2 UpD0-D3.6h IRF4_Induced NFkB_Signalling	ZNF621	34.3434	9.61822	9.57113	9.61023	9.82538	9.72658	9.57269	10.8888	9.74359	9.6244	10.0905	9.93462	9.74265	9.65427	9.5272	9.37381	9.64321	9.33945	9.23633	9.74489	9.17853	9.25033	9.76069	9.41436	9.38454
2	M2 UpD0-D3.6h IRF4_Induced NFkB_Signalling	FBXO2	33.3333	8.76667	8.71001	8.79376	8.32337	8.21134	8.34455	8.55545	8.09011	8.3414	8.30442	8.28764	8.33408	8.17926	8.11754	8.25668	8.1399	8.23864	8.26823	8.10093	8.1763	8.20733	8.15783	8.56158	8.26439
2	M2 UpD0-D3.6h IRF4_Induced NFkB_Signalling	IL6	32.3232	9.02393	9.56646	9.31663	9.77377	8.86714	8.94164	8.88096	8.18229	8.31684	8.59729	8.14782	8.26345	8.38891	8.0499	8.22995	8.1584	8.05964	8.01756	8.09091	8.17597	8.29418	8.07875	8.39804	8.66932
2	M2 UpD0-D3.6h IRF4_Induced NFkB_Signalling	CD24	31.3131	11.4996	11.3798	11.3259	9.31101	8.84329	8.99867	8.69224	8.26343	8.6806	8.86725	8.26478	8.63009	8.84493	8.80005	9.15171	8.85484	9.17512	9.5641	8.60168	9.49	9.0662	8.41589	8.9661	8.62403
2	M2 UpD0-D3.6h IRF4_Induced NFkB_Signalling	DYNLL2	31.3131	9.5597	10.0861	9.8188	9.90121	9.97005	9.96016	10.5234	10.006	10.0139	9.83694	10.3165	9.57241	9.5853	10.0311	9.47625	9.81331	10.0483	9.66753	9.75872	9.85725	9.56576	9.31983	9.78385	9.37668
2	M2 UpD0-D3.6h IRF4_Induced NFkB_Signalling	HS.580229	31.3131	8.49284	8.6436	9.00473	7.96416	8.00665	7.98655	7.93899	7.93172	7.97359	7.96424	7.9385	7.93519	7.94084	7.92236	8.09163	7.95415	7.98133	8.06776	7.90175	8.00193	7.99086	7.95962	7.95702	7.87479
2	M2 UpD0-D3.6h IRF4_Induced NFkB_Signalling	MGC10997	31.3131	11.5457	10.9488	11.5333	11.141	10.9755	10.9707	11.2504	10.9682	11.1863	11.4018	11.0489	11.168	11.0491	10.719	10.9388	11.0192	10.5845	10.6055	11.0154	10.669	10.7473	11.2062	10.7181	10.9412
2	M2 UpD0-D3.6h IRF4_Induced NFkB_Signalling	PLPP1	31.3131	8.68997	8.76097	8.75206	8.87765	8.62362	8.6718	9.03815	8.5059	8.82486	9.01821	8.61095	8.81379	8.7093	8.35427	8.34345	8.29585	8.14857	8.20838	8.51821	8.35799	8.2611	8.71794	8.32778	8.3337
2	M2 UpD0-D3.6h IRF4_Induced NFkB_Signalling	TAP2	31.3131	10.9902	11.0585	11.4746	10.0839	10.367	10.2023	9.80862	9.55022	9.90764	9.93892	9.51996	9.88856	9.81863	9.7802	10.0829	10.0914	10.2064	10.5359	9.71647	10.2601	10.2763	9.78686	10.2857	10.138
2	M2 UpD0-D3.6h IRF4_Induced NFkB_Signalling	C14orf181	27.2727	8.53576	9.14683	8.90711	8.24271	8.18359	8.198	8.39672	8.15559	8.1282	8.21137	8.33735	8.20704	8.24116	8.107	8.18256	8.15244	8.26964	8.13058	8.26541	8.28653	8.08769	8.27588	8.13957	8.16417
2	M2 UpD0-D3.6h IRF4_Induced NFkB_Signalling	GAB2	27.2727	9.92116	9.02343	9.25212	9.64609	9.15993	9.3949	9.92663	9.15013	9.35723	9.39321	9.18773	9.12734	9.14931	8.75509	8.88341	9.03893	8.87971	8.88388	9.13875	9.04911	9.24508	9.50739	9.32938	9.41136
2	M2 UpD0-D3.6h IRF4_Induced NFkB_Signalling	GALM	27.2727	8.88857	9.157	8.84643	9.34583	8.88966	9.09719	9.52368	8.42345	9.10001	9.20476	8.24652	8.72061	8.40469	7.93092	8.26206	8.43241	8.05328	8.23662	9.19646	8.3749	8.64385	9.6963	8.45474	8.86497
2	M2 UpD0-D3.6h IRF4_Induced NFkB_Signalling	MTR	27.2727	10.294	10.3286	10.4218	10.5257	10.1998	10.4958	10.8384	9.98775	10.4218	10.1673	10.0418	10.208	10.0053	9.88319	10.1677	10.0975	9.64997	9.87831	10.2291	9.86577	10.0159	10.2009	10.0644	10.1579
2	M2 UpD0-D3.6h IRF4_Induced NFkB_Signalling	PIGV	27.2727	9.14758	9.1678	9.16246	9.09658	8.89284	8.95448	9.61038	8.93225	8.75623	9.12482	8.42486	9.12261	8.73793	8.7857	8.78691	8.72938	8.47979	8.81293	8.86265	8.68191	8.73375	8.93063	8.6449	8.75673
2	M2 UpD0-D3.6h IRF4_Induced NFkB_Signalling	RAB9A	27.2727	10.9709	10.7523	10.5954	11.4272	11.1145	11.1108	11.0257	10.644	10.4627	11.2515	10.6284	10.6979	10.6636	10.3161	10.3986	10.7159	10.5117	10.4276	10.7171	10.4408	10.543	11.4444	10.762	10.8348
2	M2 UpD0-D3.6h IRF4_Induced NFkB_Signalling	RPL12P14	27.2727	10.3128	10.3991	10.2186	10.4771	9.78199	10.1419	11.0454	9.4512	9.78518	9.98245	9.5246	9.70508	9.76763	9.30071	9.5562	9.61577	9.19733	9.64199	10.1411	9.16578	9.54485	10.3094	9.15964	9.74149
2	M2 UpD0-D3.6h IRF4_Induced NFkB_Signalling	RPL12P6	27.2727	11.1996	11.8903	11.9695	11.73	11.0561	11.5619	11.8588	11.0042	11.5457	11.3016	10.8948	10.9508	10.9678	10.8676	10.875	10.9406	10.7625	10.9558	11.1086	10.6914	10.9205	11.4769	10.4295	10.8795
2	M2 UpD0-D3.6h IRF4_Induced NFkB_Signalling	RPL32P18	27.2727	13.6107	13.5644	13.5644	13.2252	12.8202	13.0263	14.0116	12.6999	12.8495	13.1629	12.8016	12.8681	12.8202	12.4507	12.7188	12.746	12.4226	12.4636	12.8981	12.3891	12.4962	12.9796	12.242	12.4672
2	M2 UpD0-D3.6h IRF4_Induced NFkB_Signalling	RPL36AP44	27.2727	9.27154	9.68238	9.67936	9.29457	9.02795	9.51475	9.96279	9.04581	9.18692	9.08568	9.10258	8.95005	9.24519	8.93914	8.83046	9.04146	9.00652	9.02699	9.41219	9.22584	9.39212	9.50341	9.04284	8.97219
2	M2 UpD0-D3.6h IRF4_Induced NFkB_Signalling	RPL36P14	27.2727	10.8272	11.516	11.3441	10.8011	10.2875	10.546	12.271	10.2527	10.5448	10.4041	10.1135	10.4399	10.0002	9.94025	10.4995	9.94964	9.86437	10.0486	10.3074	10.0121	10.2559	10.2486	9.79882	10.1557
2	M2 UpD0-D3.6h IRF4_Induced NFkB_Signalling	RPS2P40	27.2727	10.8589	11.2793	11.092	10.4493	9.75705	10.3722	12.7139	10.2403	10.4021	10.2639	10.3001	10.213	9.92283	9.89491	10.1328	9.92911	9.80968	10.0465	10.5058	9.84799	10.2693	10.3617	9.68157	10.0957
2	M2 UpD0-D3.6h IRF4_Induced NFkB_Signalling	RPS2P9	27.2727	10.4259	10.3034	10.6314	10.6466	10.1923	10.5245	11.8466	10.0747	10.1945	10.5816	10.0807	10.2618	10.3878	9.73523	10.0641	10.2019	9.76952	10.3064	10.5165	9.77899	10.1903	10.5079	9.44099	10.0019
2	M2 UpD0-D3.6h IRF4_Induced NFkB_Signalling	SMYD3	27.2727	9.64997	9.78404	9.88912	9.81141	9.46486	9.68301	9.9753	9.37492	9.66845	9.22572	9.17001	9.33544	9.3824	9.08664	9.48018	9.37035	9.04998	9.25488	9.44341	9.05572	9.2345	9.70361	9.12393	9.57255
2	M2 UpD0-D3.6h IRF4_Induced NFkB_Signalling	TANK	27.2727	10.7599	11.0944	10.7954	10.9859	10.5659	10.5417	10.9569	10.3785	10.4999	10.858	10.4248	10.4889	10.7577	10.2978	10.3712	10.6205	10.1949	10.6786	10.4788	9.99999	10.3938	10.6125	9.96871	10.3738
2	M2 UpD0-D3.6h IRF4_Induced NFkB_Signalling	TJAP1	27.2727	11.1245	11.1086	11.1357	10.4795	10.4817	10.2907	10.7038	10.9519	10.6694	10.7784	10.8011	10.5313	10.393	10.7291	10.346	10.5473	10.749	10.2395	10.7149	10.9991	10.4312	10.7043	11.1774	10.6805
2	M2 UpD0-D3.6h IRF4_Induced NFkB_Signalling	WDR60	27.2727	9.52154	9.01291	9.54737	9.3218	9.0708	9.29502	9.22097	8.82041	8.86642	8.92773	8.6018	8.93788	8.89139	8.51734	8.80274	8.82606	8.49577	8.65522	8.85246	8.41727	8.63696	8.95005	8.51383	8.67649
2	M2 UpD0-D3.6h IRF4_Induced NFkB_Signalling	ZNF23	27.2727	9.51072	9.28616	9.63355	8.96476	9.21023	8.94379	9.2108	8.81092	9.05154	8.95794	8.72615	8.90035	8.89725	8.84143	8.78348	8.94908	8.9437	8.82058	9.1284	8.60619	8.71096	9.04435	8.51709	8.64081
2	M2 UpD0-D3.6h IRF4_Induced NFkB_Signalling	FLNB	26.2626	11.1237	10.5407	10.3824	9.40131	9.76844	9.5528	9.20595	9.41256	9.30372	9.11951	9.12786	9.15789	9.04892	9.41962	9.04403	8.55239	8.81293	8.64613	8.15192	8.26808	8.45987	7.97751	8.10635	8.24915
2	M2 UpD0-D3.6h IRF4_Induced NFkB_Signalling	RPL7AP70	26.2626	13.0474	13.5088	13.1096	13.0002	12.9558	12.9106	13.9515	12.4832	12.4591	12.9053	12.9124	12.4709	12.6966	12.5794	12.4424	12.828	12.7401	12.7029	12.9834	12.7218	12.8153	13.0474	12.922	12.746
2	M2 UpD0-D3.6h IRF4_Induced NFkB_Signalling	CCDC94	24.2424	10.9164	10.8286	10.6667	10.5426	10.731	10.7855	11.2311	10.9612	10.8083	11.1151	10.9094	10.764	10.6141	10.7167	10.6964	10.7034	10.6534	10.514	10.6667	10.5209	10.2702	10.3824	10.6267	10.2919
2	M2 UpD0-D3.6h IRF4_Induced NFkB_Signalling	SLC45A3	24.2424	9.8501	10.7883	9.75616	8.39775	8.41378	8.30217	8.13244	8.25046	8.16983	8.12612	8.15706	8.13907	8.22168	8.18058	8.12317	8.23381	8.05481	8.09344	7.87365	8.0825	8.05234	7.99556	8.00473	7.99979
2	M2 UpD0-D3.6h IRF4_Induced NFkB_Signalling	IRF2BP2	23.2323	10.2369	9.74053	9.89641	9.87061	10.1079	10.0353	11.1127	9.97894	9.54351	9.97299	9.96262	10.1742	9.99135	9.78536	9.86195	9.56174	9.4313	9.7101	9.2399	9.41806	9.21128	9.84958	9.22996	9.39849
2	M2 UpD0-D3.6h IRF4_Induced NFkB_Signalling	NDST2	23.2323	9.80074	9.95886	9.74777	9.18489	9.26086	9.06374	9.21023	9.66578	9.27188	9.3813	9.85292	9.31547	9.34928	9.71771	9.14049	9.43996	9.65731	9.17969	9.32461	9.87399	9.14824	9.50254	9.7184	9.37626
2	M2 UpD0-D3.6h IRF4_Induced NFkB_Signalling	RAB3IP	23.2323	10.434	10.8353	10.5667	10.9328	10.8468	10.6926	10.4901	10.0948	10.379	10.3577	9.97314	10.2332	10.3177	10.2291	10.3982	10.4406	10.0616	10.2222	10.2157	9.92319	10.3419	9.95583	10.169	10.2157
2	M2 UpD0-D3.6h IRF4_Induced NFkB_Signalling	LAIR1	22.2222	8.39341	8.62699	8.60676	8.13341	8.12059	8.14873	8.75213	8.02958	8.0986	8.14869	8.18807	8.14409	8.13391	8.03701	8.12744	8.12987	8.11145	8.17026	8.13852	8.1778	8.21495	8.09522	8.33024	8.17161
2	M2 UpD0-D3.6h IRF4_Induced NFkB_Signalling	MEGF6	22.2222	9.20417	9.44021	9.24279	8.07831	7.97962	7.88502	8.00411	7.92855	7.97146	7.99758	7.99901	7.89094	7.96247	7.92355	7.94825	7.94077	8.01725	8.03159	7.95111	8.00233	7.98629	8.03841	7.99273	7.90639
2	M2 UpD0-D3.6h IRF4_Induced NFkB_Signalling	ST3GAL5	22.2222	10.3362	9.78761	10.0428	9.36534	8.97056	8.95648	9.04819	8.69178	8.82421	9.20742	8.69779	9.00295	8.92555	8.63864	8.806	8.70818	8.74686	8.87071	8.58689	9.01609	8.96449	8.62798	9.03517	9.01441
2	M2 UpD0-D3.6h IRF4_Induced NFkB_Signalling	BRK1	21.2121	11.5233	11.8398	11.5219	10.1309	10.213	10.1119	10.9252	10.5927	10.2057	10.2859	10.7104	10.2954	10.5794	10.7991	10.485	10.6467	11.046	10.6877	10.5653	10.6341	10.6566	10.6482	10.635	10.5221
2	M2 UpD0-D3.6h IRF4_Induced NFkB_Signalling	HS.576735	21.2121	9.54237	10.2137	9.58491	8.21563	8.29492	8.20715	8.83923	8.41206	8.26389	8.18283	8.45976	8.26952	8.4567	8.50047	8.37503	8.36463	8.42744	8.34927	8.30082	8.32722	8.46464	8.44658	8.42507	8.27193
2	M2 UpD0-D3.6h IRF4_Induced NFkB_Signalling	BEND5	20.202	9.99771	10.8967	10.3221	10.9918	10.8516	10.6512	10.3898	9.50083	9.89596	10.005	9.44849	9.73799	9.57132	9.19459	9.69147	9.15895	8.68855	9.43735	8.68711	8.54444	8.63019	8.80528	8.32762	8.35777
2	M2 UpD0-D3.6h IRF4_Induced NFkB_Signalling	BRI3	20.202	9.55753	10.2111	9.94271	10.0858	10.0538	9.94135	10.8485	10.0641	10.1813	10.1815	10.0168	9.86359	9.57146	9.65717	9.44494	9.47057	9.613	9.28679	9.27004	9.29479	9.02393	9.38104	9.2192	9.18289
2	M2 UpD0-D3.6h IRF4_Induced NFkB_Signalling	BRI3P1	20.202	9.10917	9.15056	9.35313	9.44634	8.88329	9.52498	9.64026	9.12283	9.47069	9.4675	8.96767	9.33043	9.23223	8.82146	9.10328	9.00684	8.61028	8.79706	9.05405	8.97471	8.7108	9.18565	8.66722	8.93758
2	M2 UpD0-D3.6h IRF4_Induced NFkB_Signalling	CCDC6	20.202	12.0722	12.3084	12.2764	12.4682	12.7308	12.4579	12.2351	12.0906	12.1843	12.3062	12.0169	12.2904	11.8912	11.4139	12.1687	11.4327	11.4604	11.8486	10.6685	11.2932	11.5816	10.7482	11.1863	11.2083
2	M2 UpD0-D3.6h IRF4_Induced NFkB_Signalling	CCNB1IP1	20.202	10.8706	11.4415	11.1193	11.2497	11.6573	11.4224	11.3799	11.1254	11.1855	10.8704	11.0233	10.8431	10.2535	10.4247	10.3363	10.3664	10.3982	10.2023	10.1458	10.39	10.0469	10.534	10.0707	9.87488
2	M2 UpD0-D3.6h IRF4_Induced NFkB_Signalling	CD83	20.202	10.6432	11.8456	11.4429	12.3898	12.4822	12.3881	12.311	10.8285	12.0054	12.097	10.473	11.0464	10.9884	9.48155	10.1084	9.69606	9.33373	9.38584	8.68849	8.91904	8.57894	8.41808	8.53409	8.23205
2	M2 UpD0-D3.6h IRF4_Induced NFkB_Signalling	CENPV	20.202	8.93926	9.32257	9.1636	9.52358	10.2838	9.53333	9.92612	9.92903	9.46322	9.25395	9.71506	9.12094	8.87536	9.25581	8.90213	9.00569	9.35535	8.88395	9.06163	9.10291	8.91521	8.38988	8.71975	8.57949
2	M2 UpD0-D3.6h IRF4_Induced NFkB_Signalling	CLNS1A	20.202	12.178	12.4133	11.9925	12.6162	12.9705	12.6561	12.5505	12.3073	12.4286	12.296	12.296	12.1914	12.2536	11.8068	11.8733	12.1425	11.9945	11.6398	11.8273	11.8798	11.6106	11.6973	11.5808	11.4396
2	M2 UpD0-D3.6h IRF4_Induced NFkB_Signalling	CSNK2A2	20.202	10.3208	10.5366	10.2563	10.3005	10.6413	10.4482	10.5599	10.8059	10.5422	10.4461	10.6982	10.5036	10.3385	10.4901	10.2215	10.37	10.3622	10.2351	10.1299	10.0885	9.93079	10.0366	9.88301	9.72894
2	M2 UpD0-D3.6h IRF4_Induced NFkB_Signalling	DENND5A	20.202	10.2391	10.278	10.3389	10.4747	10.3958	10.2918	10.3269	9.92589	10.0662	10.4161	9.59266	9.835	9.67232	8.8105	9.3053	9.02018	8.61327	9.08971	8.26332	8.47388	8.60481	8.17078	8.26517	8.24651
2	M2 UpD0-D3.6h IRF4_Induced NFkB_Signalling	DNPH1	20.202	9.86834	10.5381	10.0486	10.7377	10.9558	10.5527	11.628	10.8155	10.4934	10.5516	10.8211	10.3967	10.0333	10.1206	10.0278	9.75475	9.83209	9.73062	9.42436	9.4889	9.18002	9.25562	9.12139	8.86951
2	M2 UpD0-D3.6h IRF4_Induced NFkB_Signalling	EPB41L2	20.202	9.10126	9.73034	9.37762	9.80739	9.80862	9.4313	10.3607	9.1348	9.21892	9.74298	9.0724	9.17754	9.55793	9.03893	9.1707	9.41844	8.94137	9.04818	9.43295	8.67408	8.91845	8.94936	8.97064	8.78527
2	M2 UpD0-D3.6h IRF4_Induced NFkB_Signalling	GBP4	20.202	10.2849	10.7568	10.2587	11.5247	10.9682	11.1045	12.0335	10.1328	11.1045	11.5304	9.81611	10.7662	10.595	9.65871	9.84644	10.1108	9.73199	9.73344	9.5375	9.09688	8.81555	9.53392	8.67557	8.62606
2	M2 UpD0-D3.6h IRF4_Induced NFkB_Signalling	GNG11	20.202	9.52342	8.62362	9.83209	10.2809	9.06258	9.88762	9.59501	8.94593	9.62651	10.5172	9.16205	9.66655	10.2765	8.74038	9.62926	9.40434	8.52884	9.4367	8.92901	8.38701	8.82863	8.92969	8.27914	8.42994
2	M2 UpD0-D3.6h IRF4_Induced NFkB_Signalling	HS.522924	20.202	9.09248	9.06938	9.26729	9.52904	9.17777	9.50486	9.68501	8.86694	9.29739	9.40057	9.00684	9.19572	9.2787	8.60533	9.12644	9.06111	8.7115	8.89665	8.99114	8.50398	8.82166	8.85392	8.70725	8.74593
2	M2 UpD0-D3.6h IRF4_Induced NFkB_Signalling	IGFBP4	20.202	8.10259	8.78	8.15852	8.72105	8.75571	8.41195	9.2434	8.46014	8.43257	8.69634	8.30012	8.27819	8.10021	8.27563	8.14532	8.1767	8.15235	8.0519	7.98487	8.04347	8.03013	7.93332	7.9546	8.12565
2	M2 UpD0-D3.6h IRF4_Induced NFkB_Signalling	KLHL29	20.202	8.90639	8.61568	8.86269	9.13661	8.6751	8.77333	8.73551	8.57921	8.66702	9.34122	8.53846	8.58747	8.80045	8.4586	8.41883	8.74134	8.35457	8.46878	8.46141	8.2427	8.4159	8.42343	8.23642	8.42157
2	M2 UpD0-D3.6h IRF4_Induced NFkB_Signalling	KYNU	20.202	10.9617	11.0791	10.9921	11.7205	11.1661	11.6272	11.3253	10.5145	11.1915	11.5314	10.4622	11.1212	11.4295	10.3635	11.0305	10.9295	10.2641	10.9976	9.9374	9.56281	10.1215	9.70517	9.12635	9.67157
2	M2 UpD0-D3.6h IRF4_Induced NFkB_Signalling	LOC649821	20.202	13.0794	12.8695	13.1791	12.8509	12.9204	13.3755	13.0615	13.1075	13.0671	13.0504	12.6834	12.9001	12.9854	13.0244	12.8779	12.7923	12.7056	12.6516	13.0691	12.8866	12.7814	12.8509	12.3459	13.0128
2	M2 UpD0-D3.6h IRF4_Induced NFkB_Signalling	LOC653171	20.202	9.52694	9.96631	9.64926	10.0333	9.56562	9.71752	11.3659	9.72278	10.2064	9.77899	9.67847	9.57421	9.50634	9.72057	9.47667	9.72855	9.58658	9.53379	9.53897	9.77747	9.68989	9.54961	9.70775	9.80529
2	M2 UpD0-D3.6h IRF4_Induced NFkB_Signalling	LOC728098	20.202	9.56066	10.2002	9.94166	10.3641	10.1263	10.1707	10.7293	10.2165	10.629	10.3775	10.0757	9.78851	9.86375	10.032	9.74423	9.93638	9.96594	9.82469	10.0144	10.1678	10.0988	9.85127	10.0476	10.1628
2	M2 UpD0-D3.6h IRF4_Induced NFkB_Signalling	LST1	20.202	8.47709	8.72751	8.4826	9.32214	8.93041	8.8329	10.8025	8.81762	8.59176	8.9212	8.66715	8.55838	8.53627	8.24675	8.39593	8.13525	8.188	8.10864	8.12155	8.04191	8.05611	8.08437	8.01438	8.02684
2	M2 UpD0-D3.6h IRF4_Induced NFkB_Signalling	MAX	20.202	8.70324	9.05898	8.64868	8.71733	8.73335	8.72734	8.9613	9.0409	8.69875	8.94613	9.21892	8.76351	8.5835	8.76395	8.41118	8.58883	8.7343	8.50161	8.49597	8.5447	8.4636	8.51754	8.53064	8.54211
2	M2 UpD0-D3.6h IRF4_Induced NFkB_Signalling	MRPS30	20.202	11.3551	11.6851	11.5262	11.892	11.943	11.8716	11.584	11.4206	11.5205	11.8159	11.4343	11.4691	11.5965	11.1952	11.1506	11.5816	11.2118	11.2037	11.3582	11.1826	11.2606	11.0715	11.0254	11.1811
2	M2 UpD0-D3.6h IRF4_Induced NFkB_Signalling	MTHFS	20.202	10.0193	10.5033	10.165	10.6419	10.6336	10.5616	10.8442	10.2985	10.4572	10.456	10.4643	10.4284	10.3779	10.1624	10.3627	9.95871	9.67847	9.85095	9.17153	9.33073	9.24921	9.07291	8.97262	9.21501
2	M2 UpD0-D3.6h IRF4_Induced NFkB_Signalling	NEXN	20.202	8.75206	8.54694	8.48319	9.49772	8.84275	8.8932	9.26843	8.26603	8.50114	8.99152	8.13215	8.34675	8.4459	8.23276	8.21602	8.30029	8.12071	8.16602	8.20182	8.073	8.12022	8.1668	8.12667	8.16667
2	M2 UpD0-D3.6h IRF4_Induced NFkB_Signalling	NFKB2	20.202	9.08948	9.15969	8.98538	9.64903	9.79644	9.18547	10.3104	9.22762	9.1544	9.04033	8.78672	8.77968	8.66832	8.55081	8.39654	8.4558	8.45231	8.35614	8.18486	8.32597	8.29551	8.18704	8.33893	8.26758
2	M2 UpD0-D3.6h IRF4_Induced NFkB_Signalling	NGDN	20.202	11.0319	11.3883	11.5064	11.5492	11.2606	11.4671	11.1996	11.1127	11.5365	11.3461	11.1102	11.3145	11.1086	10.8585	10.94	11.416	10.921	10.8526	11.1445	10.7923	11.0164	10.8321	10.681	11.0464
2	M2 UpD0-D3.6h IRF4_Induced NFkB_Signalling	NIPSNAP1	20.202	10.2316	11.0132	10.2213	11.0438	10.8321	10.8226	11.5891	10.5105	10.8731	10.3509	10.2029	10.2285	9.96034	9.98169	9.95077	9.84368	9.90625	9.92709	9.68316	9.8328	9.64198	10.1299	9.74423	9.53875
2	M2 UpD0-D3.6h IRF4_Induced NFkB_Signalling	OPA1	20.202	9.32577	9.46063	9.49075	9.56174	9.7365	9.77469	9.71416	9.23667	9.4071	9.55934	9.38079	9.43187	9.47869	9.3821	9.5728	9.55793	9.26201	9.35648	9.27608	8.98098	9.33534	9.04612	9.34066	9.16844
2	M2 UpD0-D3.6h IRF4_Induced NFkB_Signalling	PARVB	20.202	9.72627	10.3658	9.77631	10.2107	10.2756	10.2683	10.7729	10.2084	10.1617	10.0692	10.1427	10.0583	9.82968	9.64546	9.9084	9.65717	9.65992	9.74178	9.76844	9.83862	9.69559	9.69569	9.63425	9.35299
2	M2 UpD0-D3.6h IRF4_Induced NFkB_Signalling	PEX7	20.202	9.10398	9.26452	9.22825	9.31157	9.47026	9.57432	9.35953	8.95166	9.18773	9.21804	8.95311	9.12368	9.20315	8.85519	8.92754	9.14866	8.90362	8.77827	8.94021	8.93116	8.85559	8.74936	8.77318	8.75832
2	M2 UpD0-D3.6h IRF4_Induced NFkB_Signalling	PHB2	20.202	11.3757	11.7773	11.5285	12.0662	12.0489	11.8101	13.4613	12.1548	11.883	11.8433	11.9658	11.7072	11.2808	11.73	11.4272	11.5057	11.6068	11.3942	11.3997	11.6601	11.6289	11.2218	11.4409	11.4406
2	M2 UpD0-D3.6h IRF4_Induced NFkB_Signalling	PIM3	20.202	8.9218	9.34308	9.33175	9.47931	9.75887	9.44181	10.814	9.44128	9.34758	9.27855	9.1692	8.90147	9.05964	9.25803	9.06144	9.16068	9.30297	9.10328	9.07395	9.28326	9.18784	8.98341	9.16382	8.99839
2	M2 UpD0-D3.6h IRF4_Induced NFkB_Signalling	PLAGL1	20.202	8.36263	8.59201	8.35122	8.58891	8.70316	8.65496	8.29078	8.31194	8.55116	8.47073	8.21968	8.43468	8.23837	8.22758	8.32301	8.23287	8.15168	8.18815	8.01881	8.14812	8.15993	8.0735	8.04408	8.18093
2	M2 UpD0-D3.6h IRF4_Induced NFkB_Signalling	RIPK2	20.202	10.3407	10.4027	10.2607	11.5078	11.3704	11.4409	10.9958	10.5234	10.8636	10.861	10.2859	10.372	10.1713	9.87082	9.98991	9.8551	10.0688	9.91041	9.73199	9.71045	9.70607	9.81758	9.57797	9.56324
2	M2 UpD0-D3.6h IRF4_Induced NFkB_Signalling	RNFT1	20.202	8.95835	8.8725	9.01206	9.35158	8.90864	9.26565	9.00922	8.88831	8.90035	9.21535	8.8457	8.83055	9.23969	9.06634	8.82104	9.18607	8.95034	8.96028	8.86159	8.73255	8.69002	8.78716	8.58811	8.55951
2	M2 UpD0-D3.6h IRF4_Induced NFkB_Signalling	SMIM19	20.202	11.3236	11.5643	11.2656	11.6566	11.7773	11.7455	11.833	11.4178	11.3661	11.6152	11.5926	11.318	11.3997	11.0726	11.301	11.2415	10.8585	11.0164	10.9159	10.7604	10.6097	11.2504	10.6487	10.6685
2	M2 UpD0-D3.6h IRF4_Induced NFkB_Signalling	SPATA20	20.202	10.0546	9.31477	9.77313	10.0557	9.6789	9.77104	11.8323	9.51581	9.65368	9.70008	9.66914	9.70566	9.8193	9.3363	9.60747	9.47581	8.97521	9.44524	9.3558	9.18508	9.13895	9.57368	9.26553	9.27188
2	M2 UpD0-D3.6h IRF4_Induced NFkB_Signalling	STAG3	20.202	9.1406	9.8712	8.99494	9.97658	10.3954	10.1229	10.4253	10.466	9.98594	9.72956	10.4135	9.88402	9.32136	10.0901	9.47139	9.00431	9.56364	8.94259	8.59132	8.72147	8.41084	8.32027	8.67747	8.46351
2	M2 UpD0-D3.6h IRF4_Induced NFkB_Signalling	STAT5A	20.202	10.5145	10.7849	10.5155	10.7764	11.1674	10.6905	10.3145	10.4891	10.7556	10.6618	10.2855	10.5983	10.2734	10.4348	10.5185	9.6746	10.2617	10.0252	9.26057	9.82481	9.61578	9.12013	9.22604	9.05593
2	M2 UpD0-D3.6h IRF4_Induced NFkB_Signalling	TARBP1	20.202	9.9753	9.39624	9.97687	10.0695	10.5389	10.1767	9.91981	9.59909	9.37626	9.6073	9.50967	9.52498	9.63178	9.49888	9.75631	9.31728	9.057	9.22389	8.77473	8.90216	8.93827	8.77809	8.71387	8.87004
2	M2 UpD0-D3.6h IRF4_Induced NFkB_Signalling	TBC1D4	20.202	8.23348	8.21131	8.21878	8.84116	8.80849	8.5015	8.42112	8.17666	8.31624	8.51903	8.05797	8.31419	8.35794	8.21081	8.22935	8.2265	8.16032	8.08776	8.13412	8.07341	8.13954	7.93636	8.08169	7.96466
2	M2 UpD0-D3.6h IRF4_Induced NFkB_Signalling	TNFAIP3	20.202	9.56349	9.5696	9.44381	11.2247	11.0267	10.459	10.5341	9.30432	9.54409	10.2864	9.00515	9.30337	9.99917	8.65604	8.89648	9.38522	8.79174	8.71305	8.85383	8.69729	8.71598	9.02335	8.74325	8.97958
2	M2 UpD0-D3.6h IRF4_Induced NFkB_Signalling	TNFAIP8	20.202	11.0709	11.1549	10.9388	12.272	11.5141	11.7681	11.8458	10.9442	11.2522	12.1521	11.3023	10.7043	12.0083	10.8083	10.4366	11.7474	10.8055	11.1555	10.8353	10.4909	10.5601	10.7445	10.0695	10.5213
2	M2 UpD0-D3.6h IRF4_Induced NFkB_Signalling	TNFRSF10B	20.202	10.2107	10.4901	10.5438	10.9388	11.1573	11.2965	11.0812	9.95446	10.8918	10.0486	10.0238	10.0648	9.94947	9.99183	10.1636	9.89207	9.82188	9.99885	9.62712	9.56911	9.64122	9.59701	9.26114	9.23691
2	M2 UpD0-D3.6h IRF4_Induced NFkB_Signalling	TNFSF10	20.202	10.2592	10.3549	10.303	10.7277	10.4404	10.6769	10.2053	10.1882	10.2737	10.5603	10.0445	10.366	10.006	10.162	10.1791	9.70816	9.97103	9.97404	9.69152	9.79296	9.86546	9.90057	9.6871	9.75226
2	M2 UpD0-D3.6h IRF4_Induced NFkB_Signalling	TRAPPC2B	20.202	8.97579	9.25234	9.09475	9.43844	9.02752	9.39284	9.78438	9.01343	9.04847	9.35475	9.1707	9.00294	9.13421	8.91437	8.76979	8.94945	8.89784	8.84926	8.78427	8.80779	8.58432	8.82166	8.55293	8.47908
2	M2 UpD0-D3.6h IRF4_Induced NFkB_Signalling	UBE2L6	20.202	10.944	11.2768	10.9856	11.8217	11.4277	11.4856	11.9745	11.0019	11.2754	11.5615	10.9752	10.9884	11.2821	10.7672	10.5357	10.9892	10.7986	10.4403	10.8561	10.9015	10.4999	10.8036	10.7843	10.4627
2	M2 UpD0-D3.6h IRF4_Induced NFkB_Signalling	ZNF165	20.202	9.0953	9.36151	9.06535	8.91674	9.04233	9.12114	9.56927	9.2186	9.44923	9.56927	8.8512	9.08718	8.97731	9.00243	8.90655	8.96502	8.91806	8.81957	8.89518	8.7304	8.6249	8.7382	8.62383	8.68339
2	M2 UpD0-D3.6h IRF4_Induced NFkB_Signalling	C8orf33	19.1919	10.2337	10.4152	10.4976	10.4075	10.6856	10.3601	10.6104	10.6539	10.4452	10.7473	10.7893	10.4159	10.259	10.2197	10.2144	10.329	10.4239	10.1105	10.1261	10.2355	10.0453	9.67367	10.2886	9.99981
2	M2 UpD0-D3.6h IRF4_Induced NFkB_Signalling	NR4A2	19.1919	8.51486	8.78682	8.86193	10.1054	8.83319	10.1107	8.53211	8.16963	8.94434	8.6014	8.15733	8.46265	8.20725	8.04144	8.27827	8.15373	8.08372	8.20194	8.02954	8.0897	8.11341	8.17721	8.06943	8.09651
2	M2 UpD0-D3.6h IRF4_Induced NFkB_Signalling	TBC1D22B	19.1919	8.62286	8.42328	8.61543	8.57286	8.88416	8.62625	8.66474	8.71088	8.63125	8.64903	8.69569	8.62104	8.43893	8.61497	8.59798	8.37997	8.57941	8.39119	8.26789	8.3749	8.24102	8.18335	8.30946	8.11447
2	M2 UpD0-D3.6h IRF4_Induced NFkB_Signalling	NSMCE1	18.1818	10.4287	11.0048	10.5422	10.8975	11.372	10.9261	13.1871	11.007	10.6914	10.7254	11.0054	10.4944	10.5682	11.0215	10.5924	10.439	10.8343	10.4135	9.95856	10.518	9.73034	9.9572	10.218	9.62128
2	M2 UpD0-D3.6h IRF4_Induced NFkB_Signalling	LBH	17.1717	8.95871	8.58396	9.1511	9.24635	8.60012	9.22726	8.8224	8.4477	9.3228	9.30272	8.26529	8.96512	8.57924	8.31651	8.73892	8.30465	8.35107	8.97948	8.1772	8.20682	8.49084	8.31749	8.21635	8.31564
2	M2 UpD0-D3.6h IRF4_Induced NFkB_Signalling	CAST	14.1414	10.2328	9.96956	11.1595	9.95095	9.79863	10.2055	10.0554	9.55872	10.4395	10.0608	9.60068	10.1937	9.65992	9.44958	10.0296	9.55579	9.64546	9.99637	9.39274	9.29479	9.82911	9.58321	9.15523	9.65992
3	M3 UpD0-D3.0h MYD88_INF ZincFinger	ABCB4	100	9.83547	10.4753	10.0086	9.0011	9.34296	9.28145	8.7102	8.87004	9.24279	8.84076	8.75151	8.83227	8.40785	8.86433	8.8339	8.46526	8.88134	9.11059	8.23263	8.66279	8.54984	8.32818	8.32168	8.12118
3	M3 UpD0-D3.0h MYD88_INF ZincFinger	ABLIM1	100	11.3022	11.4022	11.399	10.0773	10.2465	10.4243	9.52739	10.3689	10.4567	10.2096	10.3485	10.5362	10.2706	10.2784	10.3754	9.85587	9.95845	10.2659	8.90472	9.15976	9.56343	9.64932	8.98827	9.38838
3	M3 UpD0-D3.0h MYD88_INF ZincFinger	AFAP1L2	100	9.10773	8.66168	8.73272	8.81927	8.7148	8.90113	8.26522	8.37172	8.22377	8.53943	8.38859	8.51909	8.51369	8.53039	8.43329	8.43546	8.48362	8.63045	8.23263	8.40789	8.28668	8.29285	8.14228	8.23403
3	M3 UpD0-D3.0h MYD88_INF ZincFinger	AFF3	100	11.7973	11.6542	12.1061	9.71256	10.0227	10.2337	8.13535	9.38751	9.77724	9.4911	9.74122	10.6703	10.2288	10.1528	11.2447	9.53897	9.90764	10.5749	8.91641	9.45784	9.50634	8.96802	8.83227	8.83588
3	M3 UpD0-D3.0h MYD88_INF ZincFinger	AKAP7	100	10.1959	10.5857	10.4253	9.55294	9.90417	9.57241	8.61252	9.33097	9.0673	9.47679	9.49888	9.32148	9.2905	9.03065	9.07752	9.05604	8.91538	8.71467	8.66722	8.58364	8.4619	9.02902	8.58811	8.28692
3	M3 UpD0-D3.0h MYD88_INF ZincFinger	ALDH5A1	100	9.34244	9.23028	9.67418	8.71745	8.61251	8.71669	8.1119	8.34977	8.71892	8.77098	8.48306	8.81191	8.73637	8.40789	8.76891	8.63196	8.3095	8.59625	8.23209	8.21003	8.34173	8.20123	8.19528	8.18353
3	M3 UpD0-D3.0h MYD88_INF ZincFinger	ALOX5AP	100	13.0777	13.266	13.1525	11.6051	11.0031	10.9134	10.7988	10.9382	10.7723	11.5878	11.108	10.5848	10.8526	10.1914	10.4029	9.98832	9.81203	10.8226	9.7923	9.96778	10.674	10.6248	9.32644	10.3712
3	M3 UpD0-D3.0h MYD88_INF ZincFinger	AMPD3	100	8.70524	8.57715	8.4991	8.26363	8.17839	8.09626	8.05877	8.15885	8.15883	8.36593	8.11458	8.30147	8.23594	8.01089	8.10484	8.24671	7.97946	8.10141	7.99468	8.03421	7.97377	8.03524	7.92942	7.8992
3	M3 UpD0-D3.0h MYD88_INF ZincFinger	ARHGAP24	100	10.6876	10.5472	10.2632	9.31591	9.38303	9.17839	8.50868	8.81203	8.9252	8.98769	9.00823	8.83513	8.75011	8.50083	8.77138	8.48696	8.47365	8.65372	8.29677	8.24955	8.45949	8.43014	8.12475	8.27786
3	M3 UpD0-D3.0h MYD88_INF ZincFinger	ARL6IP5	100	13.616	13.4768	13.4026	13.0727	13.0414	13.1363	11.5695	13.1482	13.3535	13.5262	13.438	13.6608	13.5135	13.0794	13.209	13.0709	12.9595	13.1052	12.9089	12.5618	12.6851	12.8134	12.4412	12.4636
3	M3 UpD0-D3.0h MYD88_INF ZincFinger	ASAP1	100	10.1362	10.3098	10.332	9.72179	9.94897	9.81758	8.59747	9.83263	9.95139	9.73873	9.71059	9.6798	9.33503	9.6362	9.87831	9.29703	9.63061	9.7098	9.23136	9.65427	9.75832	9.58658	9.67995	9.6696
3	M3 UpD0-D3.0h MYD88_INF ZincFinger	BEX2	100	10.713	11.1003	10.9134	10.5613	11.1743	10.9061	9.70949	10.7615	10.5646	10.4749	10.8155	10.3617	9.51353	9.73298	9.54093	9.09678	9.42565	9.355	9.04735	9.04648	8.75038	8.97393	8.99039	8.4531
3	M3 UpD0-D3.0h MYD88_INF ZincFinger	BPNT1	100	9.37762	8.93758	9.61603	9.11467	9.6734	9.86083	8.01249	9.6159	9.64609	8.83129	9.28877	9.76927	9.51353	9.65675	9.5793	9.19597	9.40206	9.55091	9.09633	9.33902	9.4552	8.88127	9.10481	9.13866
3	M3 UpD0-D3.0h MYD88_INF ZincFinger	BRD3	100	10.2976	10.052	10.167	9.5597	9.83332	9.2137	9.10075	9.61839	9.29457	9.28957	9.48078	9.4784	9.10493	9.79796	9.67859	8.9655	9.29081	9.13679	8.62362	9.2573	8.97019	8.72425	9.09603	8.92855
3	M3 UpD0-D3.0h MYD88_INF ZincFinger	C12orf29	100	9.91523	9.83193	9.85413	9.27556	9.46738	9.1799	8.23319	9.25354	9.35313	9.32804	9.37602	9.34377	9.36876	9.23076	9.29159	9.5	9.11532	9.13154	9.36503	9.05747	9.27376	9.17356	9.14568	9.34413
3	M3 UpD0-D3.0h MYD88_INF ZincFinger	C12orf76	100	9.56511	9.53439	9.42586	8.71353	8.9592	8.90326	8.51986	9.02285	8.62819	8.89605	8.93585	8.78079	8.92474	8.67905	8.51791	8.78079	8.69852	8.64747	8.63085	8.78437	8.66138	8.89667	8.62409	8.57264
3	M3 UpD0-D3.0h MYD88_INF ZincFinger	C21orf33	100	12.0413	12.2325	12.117	11.8231	11.9936	12.0135	10.8725	12.0582	11.9515	11.8149	12.0195	12.0986	11.7754	12.0094	11.9087	11.7216	11.9451	11.9581	11.2848	11.7213	11.7359	11.519	11.556	11.6519
3	M3 UpD0-D3.0h MYD88_INF ZincFinger	CABYR	100	8.45216	9.64744	8.76257	8.5635	9.11377	8.87434	8.13652	8.57308	8.6544	8.2317	8.55211	8.41688	8.24283	8.30625	8.37338	8.1142	8.05863	8.41604	8.02636	8.22304	7.9702	8.0472	7.92232	7.96466
3	M3 UpD0-D3.0h MYD88_INF ZincFinger	CAMLG	100	12.9761	13.2937	12.8897	13.1828	13.3304	13.1096	12.2102	12.9796	12.8105	12.8169	12.746	12.5404	12.3329	12.3433	12.2246	12.2938	12.4311	12.0771	12.4567	12.4321	12.0036	12.7876	12.271	11.9667
3	M3 UpD0-D3.0h MYD88_INF ZincFinger	CBLN3	100	10.9004	10.6766	11.36	9.30171	9.08772	9.19177	8.17972	8.92614	9.2578	9.2626	9.03065	9.44591	9.20584	8.65313	9.02925	8.94736	8.66577	9.01172	8.60032	8.59536	8.64059	8.62736	8.39934	8.49449
3	M3 UpD0-D3.0h MYD88_INF ZincFinger	CCL28	100	8.97456	9.17879	9.10186	8.28767	8.43026	8.44029	8.04612	8.4356	8.26346	8.18921	8.39073	8.1743	8.18147	8.22333	8.20258	8.17031	8.24703	8.25384	8.05559	8.18858	8.12294	8.21026	8.2413	7.98529
3	M3 UpD0-D3.0h MYD88_INF ZincFinger	CCNY	100	10.2566	10.1364	10.3105	9.66023	10.0093	9.90896	9.15505	10.0253	9.98902	9.93574	9.99685	9.97061	9.92861	9.71446	9.89966	9.70275	9.83052	9.82656	9.39274	9.66044	9.60278	9.3983	9.53221	9.43091
3	M3 UpD0-D3.0h MYD88_INF ZincFinger	CCSER2	100	9.64394	9.56437	9.652	9.31238	9.27749	9.68641	9.08832	9.10522	9.51967	9.46628	9.27435	9.37471	9.27006	9.17836	9.45821	8.99966	9.12574	9.34362	8.82811	8.9811	9.07634	9.17741	8.86986	8.90542
3	M3 UpD0-D3.0h MYD88_INF ZincFinger	CD1A	100	8.60966	10.1779	8.93235	8.53237	9.24849	8.36386	8.12748	8.64655	8.26752	8.38458	8.36911	8.10005	8.23837	8.03565	8.18848	7.98414	8.13285	8.1199	8.03029	8.20227	8.17918	8.00101	8.11426	8.03453
3	M3 UpD0-D3.0h MYD88_INF ZincFinger	CD200	100	8.86971	10.2568	9.31168	8.1726	8.42305	8.46917	8.09355	8.26029	8.15379	8.09751	8.21112	8.35747	8.21687	8.20023	8.11695	8.08733	8.12716	8.11456	8.01769	8.26998	8.11072	7.97709	8.09084	8.10366
3	M3 UpD0-D3.0h MYD88_INF ZincFinger	CD55	100	9.8813	10.1093	9.97467	9.3746	9.14096	9.63607	8.18956	9.39389	9.58673	9.11305	8.86578	9.42686	8.86459	8.90624	9.06721	8.81646	8.60936	8.97493	8.79261	9.02021	9.39031	8.89595	8.70584	8.83192
3	M3 UpD0-D3.0h MYD88_INF ZincFinger	CD69	100	10.6259	12.6226	12.0575	11.2058	10.7087	11.3163	8.48329	9.31127	9.4919	9.44581	9.35342	9.41599	9.30336	9.46488	9.47158	9.34651	9.58244	9.49682	9.4366	9.44845	9.15698	9.85897	9.30959	9.43067
3	M3 UpD0-D3.0h MYD88_INF ZincFinger	CDC40	100	11.6331	11.3684	11.6368	10.7609	10.8871	10.7149	9.02248	10.8215	10.692	10.7048	10.7933	10.823	10.6218	10.7198	10.6317	10.5238	10.6136	10.6403	10.3808	10.4956	10.4976	10.4493	10.4271	10.3121
3	M3 UpD0-D3.0h MYD88_INF ZincFinger	CEACAM1	100	9.57177	8.90867	9.31854	8.4513	8.35369	8.33556	8.01082	8.02702	8.08702	8.38257	8.05955	8.12191	8.11442	7.98661	8.04229	8.05258	7.98987	8.01413	7.95643	8.06734	7.98185	7.91971	7.91979	7.93652
3	M3 UpD0-D3.0h MYD88_INF ZincFinger	CFAP97	100	8.95034	9.01419	9.12946	8.59849	8.68352	8.64785	8.04804	8.37961	8.4322	8.42433	8.56109	8.60775	8.5835	8.36196	8.68839	8.49676	8.43484	8.49527	8.42573	8.25176	8.41759	8.09154	8.28288	8.31331
3	M3 UpD0-D3.0h MYD88_INF ZincFinger	CHMP1B	100	10.7124	11.2861	11.1488	10.4432	10.4608	10.412	9.7541	10.0925	9.97502	10.2902	10.2707	10.0808	10.2477	9.90277	9.66344	10.0538	10.0094	9.83241	9.83102	9.87042	9.66392	9.84738	9.87922	9.64392
3	M3 UpD0-D3.0h MYD88_INF ZincFinger	CLN8	100	8.78589	8.39733	8.87105	8.27076	8.3767	8.35283	8.1366	8.50448	8.6441	8.34153	8.26452	8.41976	8.26784	8.30243	8.53459	8.23745	8.26869	8.50396	8.16198	8.24271	8.29626	8.17694	8.16242	8.12368
3	M3 UpD0-D3.0h MYD88_INF ZincFinger	CNN3	100	8.74487	9.24859	8.54101	8.7709	10.0413	8.96059	7.98494	8.67149	8.52786	8.63683	8.64456	8.4402	8.30494	8.58938	8.25495	8.30376	8.5953	8.16691	8.1982	8.18767	8.01	8.21578	8.19263	7.94372
3	M3 UpD0-D3.0h MYD88_INF ZincFinger	COIL	100	10.7556	10.9073	10.5653	10.4103	10.622	10.3634	9.19698	10.5846	10.2726	10.6589	10.5771	10.4673	10.3468	10.3239	10.3177	10.3333	10.2512	10.1243	10.1466	10.2243	10.1667	10.0688	10.2326	10.135
3	M3 UpD0-D3.0h MYD88_INF ZincFinger	CTNNBIP1	100	8.63785	8.98161	8.64097	7.98456	8.22716	8.14411	8.00178	8.24618	8.21739	8.1642	8.28932	8.19873	8.05697	8.20023	8.1734	8.15024	8.02219	8.04107	8.07591	8.09412	8.12114	8.07719	7.99273	8.11977
3	M3 UpD0-D3.0h MYD88_INF ZincFinger	CTPS2	100	10.2488	10.0407	9.97787	9.70231	10.0583	9.82026	8.97683	9.62018	9.37668	9.39416	9.76466	9.47988	9.80923	9.53977	9.59404	9.54542	9.17807	9.05855	9.18204	9.10011	8.99734	9.20223	9.34234	8.82731
3	M3 UpD0-D3.0h MYD88_INF ZincFinger	DCUN1D4	100	10.6547	10.595	10.4884	9.75241	9.87922	9.49456	9.1955	9.58307	9.67137	9.43582	9.94732	9.70176	9.58996	9.51389	9.70921	9.68373	9.43996	9.38706	9.74692	9.42852	9.50953	9.69255	9.40434	9.52112
3	M3 UpD0-D3.0h MYD88_INF ZincFinger	DDX60	100	9.27376	9.46345	9.39055	8.77613	8.89331	9.01779	8.31832	8.47939	8.70076	8.53695	8.45403	8.67105	8.49357	8.39194	8.56215	8.34386	8.35001	8.42891	8.13309	8.17983	8.217	8.03893	8.03866	8.14522
3	M3 UpD0-D3.0h MYD88_INF ZincFinger	DDX60L	100	9.16138	9.03684	8.89762	8.16629	8.31159	8.14973	8.04172	8.1205	8.11336	8.18097	8.12957	8.15439	8.14007	8.02191	8.13019	8.19483	8.1351	8.21052	7.94954	8.12659	8.02113	7.99161	8.03306	8.01063
3	M3 UpD0-D3.0h MYD88_INF ZincFinger	DENND4C	100	9.6172	9.40745	9.55485	8.75424	8.66171	8.91313	8.22987	8.79872	8.99676	8.76615	8.75502	9.25047	8.62165	8.64934	9.02525	8.43828	8.56182	8.7241	8.12798	8.43516	8.49273	8.20026	8.4269	8.56902
3	M3 UpD0-D3.0h MYD88_INF ZincFinger	DIAPH2	100	10.3846	10.5852	10.3498	9.63087	9.82493	9.78851	9.38251	9.45887	9.76015	9.33349	9.56291	9.47555	9.37013	9.26477	9.60001	9.22584	9.39825	9.42039	9.19764	9.22438	9.16322	9.46937	9.19809	9.11393
3	M3 UpD0-D3.0h MYD88_INF ZincFinger	DIS3L	100	11.3133	11.1292	11.3977	10.6463	10.9066	10.8569	8.29925	10.5644	10.3172	10.5585	10.6905	10.5284	10.7124	10.6007	10.7991	10.5155	10.478	10.3903	10.4278	10.6873	10.367	10.5105	10.5109	10.5733
3	M3 UpD0-D3.0h MYD88_INF ZincFinger	DLGAP1-AS1	100	8.68746	8.72257	8.68971	8.25418	8.4942	8.50522	8.05911	8.38175	8.42405	8.4275	8.49271	8.59221	8.34496	8.42538	8.4221	8.10231	8.30625	8.32027	8.07418	8.17555	8.23074	8.11084	7.96914	8.05061
3	M3 UpD0-D3.0h MYD88_INF ZincFinger	DMAC1	100	9.21945	9.50341	9.60068	8.14475	8.42599	8.37085	8.03564	8.40465	8.39734	8.39227	8.45196	8.42696	8.30043	8.20704	8.31605	8.24159	8.24719	8.2775	8.11347	8.21255	8.27943	8.07277	8.28452	8.1104
3	M3 UpD0-D3.0h MYD88_INF ZincFinger	DNAJC30	100	9.20822	9.13095	9.29373	8.35311	8.45277	8.3553	8.06457	8.57396	8.53973	8.58628	8.58631	8.50369	8.42422	8.37888	8.47248	8.35329	8.32806	8.34037	8.26165	8.24423	8.26275	8.18325	8.15241	8.15869
3	M3 UpD0-D3.0h MYD88_INF ZincFinger	DNASE1L3	100	8.69916	10.1945	8.82023	8.05669	8.42902	8.17934	7.86233	8.6144	8.1752	8.0907	8.58862	8.25742	8.15966	8.01814	8.13701	8.03218	8.08235	7.93889	7.96175	8.01366	7.95998	7.96222	7.89732	7.89968
3	M3 UpD0-D3.0h MYD88_INF ZincFinger	DOCK7	100	9.24131	8.89583	9.10528	9.35048	9.17195	9.0683	8.85177	8.92893	8.92634	8.81782	8.97284	8.95102	9.15045	8.89062	9.04006	9.14758	8.71733	8.82216	8.87206	8.56114	8.62985	8.71296	8.84476	8.7507
3	M3 UpD0-D3.0h MYD88_INF ZincFinger	DRAM2	100	11.3487	11.1857	11.29	9.79149	10.2277	10.0291	8.88096	9.47454	9.53763	9.31638	9.33745	9.49339	9.55594	9.5821	9.67472	9.60747	9.62277	9.68039	9.40232	9.6534	9.2912	9.57291	9.47359	9.24552
3	M3 UpD0-D3.0h MYD88_INF ZincFinger	EBF1	100	11.5285	11.9358	11.7518	10.898	11.3016	11.3088	8.643	10.5442	10.7692	10.5313	10.4164	10.8686	10.2457	10.6398	11.2113	10.2685	10.8998	10.8348	9.62926	10.3986	10.1116	10.174	10.0007	9.81159
3	M3 UpD0-D3.0h MYD88_INF ZincFinger	ECHDC2	100	12.4346	11.4818	11.9515	11.0947	11.1362	10.9144	10.3562	11.3647	10.7382	11.1275	11.5036	11.1405	11.1022	11.0242	10.8657	10.8121	10.9118	10.5637	10.4456	10.7512	9.84143	11.035	10.5936	9.91847
3	M3 UpD0-D3.0h MYD88_INF ZincFinger	EEF1A1	100	11.3389	11.7165	11.022	10.2009	10.6109	10.0957	9.2434	10.3934	9.85981	10.1864	10.652	9.92388	9.92449	10.0267	9.88189	9.7401	9.77694	9.53425	9.38729	9.64756	8.97996	9.0953	9.41075	8.95272
3	M3 UpD0-D3.0h MYD88_INF ZincFinger	EEF1A1P11	100	12.3649	12.8299	12.6819	11.6236	12.1071	12.0456	11.0548	11.9166	12.2083	11.8316	11.9412	12.2396	11.5093	11.8458	12.1356	11.5674	11.7105	11.6127	11.1555	11.5901	11.3194	11.6236	11.5093	11.5247
3	M3 UpD0-D3.0h MYD88_INF ZincFinger	EEF1A1P17	100	10.1119	10.6214	10.1491	9.6188	10.0871	9.8381	9.11547	9.74665	9.75176	9.73539	9.73522	9.58162	9.55462	9.71885	9.51644	9.53977	9.58401	9.22813	9.45324	9.42421	9.11765	9.39307	9.28935	8.88032
3	M3 UpD0-D3.0h MYD88_INF ZincFinger	ELF2	100	10.1002	9.85413	10.2672	9.8972	10.1518	10.1721	8.18361	9.86697	9.80693	9.97862	9.86834	9.61956	10.0187	9.82174	9.77213	9.84107	9.81571	9.81485	9.42368	9.62989	9.65978	9.70995	9.72749	9.77313
3	M3 UpD0-D3.0h MYD88_INF ZincFinger	ESPNL	100	10.2849	9.08079	10.0721	8.22789	8.26592	8.3251	7.99993	8.17087	8.17819	8.08418	8.05096	8.11091	8.04402	8.07844	8.09884	8.04152	8.08831	8.13397	8.02636	8.14434	8.17871	8.14465	8.01018	7.95731
3	M3 UpD0-D3.0h MYD88_INF ZincFinger	EXOSC6	100	11.512	11.9132	11.8658	11.06	11.3647	11.3103	10.3982	11.4585	11.7294	11.4384	11.6584	11.499	10.9261	11.0042	11.0655	11.054	11.0209	10.9723	10.822	11.0036	10.5811	10.3674	10.8526	10.5284
3	M3 UpD0-D3.0h MYD88_INF ZincFinger	FAM117B	100	11.8054	11.53	11.7919	9.72053	9.68471	9.86773	8.09013	9.23644	9.41724	9.46763	9.31773	9.74529	9.50569	9.16403	9.59705	9.41322	9.30683	9.56495	9.19844	9.14722	9.07229	9.30296	8.94492	8.98188
3	M3 UpD0-D3.0h MYD88_INF ZincFinger	FAM172A	100	10.0089	10.2592	9.92623	8.93311	9.39937	9.32354	8.12063	9.18363	8.99962	8.96395	9.17032	9.20029	9.19198	9.08412	9.2056	9.00464	9.1088	9.15573	8.75718	9.06866	8.91921	8.95383	8.93152	8.82703
3	M3 UpD0-D3.0h MYD88_INF ZincFinger	FAM210B	100	9.1562	8.93726	9.27682	8.08893	8.10152	8.14065	8.0311	8.13577	8.22634	8.2014	8.03049	8.16617	8.2138	8.08383	8.39454	8.16302	8.00625	8.13972	8.06322	7.9483	8.00196	8.09294	8.09398	8.06283
3	M3 UpD0-D3.0h MYD88_INF ZincFinger	FAM86HP	100	9.01863	9.25453	8.99617	9.15836	9.47454	9.17819	8.85639	8.91926	8.9896	8.97549	8.95026	8.92855	9.20722	8.83129	9.04027	8.95928	8.70478	8.83818	8.77613	8.75649	8.88229	8.56941	8.54575	8.60538
3	M3 UpD0-D3.0h MYD88_INF ZincFinger	FBXO15	100	8.7847	8.60985	8.39394	8.52792	8.55349	8.36245	8.04731	8.74241	8.29879	8.58253	8.84819	8.26467	8.49597	8.5238	8.26708	8.22421	8.20725	8.09367	8.03888	8.12139	8.02053	8.10795	8.09181	8.0005
3	M3 UpD0-D3.0h MYD88_INF ZincFinger	FMNL3	100	9.10146	9.52244	9.24375	8.90957	8.70813	8.67416	8.46244	8.80244	8.77435	8.88086	9.04102	8.75908	8.85725	8.80189	8.64589	8.63573	8.70412	8.4893	8.39292	8.3324	8.28161	8.46865	8.20297	8.13193
3	M3 UpD0-D3.0h MYD88_INF ZincFinger	FOXK1	100	10.1624	9.66779	10.0967	9.65568	10.0812	9.82098	8.94736	9.5853	9.97941	9.78554	9.61822	9.6216	9.77631	9.86083	9.81123	9.67181	9.74282	9.77914	9.47107	9.65168	9.75557	9.58774	9.38599	9.61839
3	M3 UpD0-D3.0h MYD88_INF ZincFinger	FOXP1	100	9.08851	9.17506	9.30757	8.58774	8.43446	8.48527	8.19501	8.32934	8.45122	8.45849	8.41206	8.39572	8.42839	8.27905	8.51952	8.26546	8.31863	8.53394	8.32481	8.28473	8.3138	8.29378	8.21635	8.36113
3	M3 UpD0-D3.0h MYD88_INF ZincFinger	GAS6-AS1	100	10.2734	9.62807	9.18067	8.65834	8.96476	8.44666	8.22673	8.78494	8.47357	8.56822	8.8384	8.29804	8.81466	8.70985	8.43384	8.55402	8.8115	8.45896	8.36681	8.66783	8.09901	8.33926	8.40023	8.09589
3	M3 UpD0-D3.0h MYD88_INF ZincFinger	GATAD1	100	9.06858	8.83036	9.09578	8.88694	8.7873	8.72176	8.68378	8.86813	8.81588	9.04838	8.82844	8.83081	8.68927	8.49558	8.64136	8.69074	8.63973	8.60932	8.54512	8.35489	8.5582	8.58636	8.33537	8.65095
3	M3 UpD0-D3.0h MYD88_INF ZincFinger	GCNT1	100	9.61189	10.6699	10.2801	8.79912	8.66022	8.80609	8.44988	9.30842	9.36235	9.5421	9.14295	9.22704	9.05007	8.60596	8.94602	8.70396	8.28105	8.51766	8.18546	8.18212	8.16977	8.01875	8.10806	8.05171
3	M3 UpD0-D3.0h MYD88_INF ZincFinger	GGNBP2	100	11.0817	11.1068	11.0048	10.8558	11.0585	10.7272	10.3988	10.9353	10.6685	10.8553	10.9686	10.7366	10.762	10.587	10.6216	10.6677	10.6996	10.6341	10.3427	10.602	10.4997	10.6313	10.5523	10.42
3	M3 UpD0-D3.0h MYD88_INF ZincFinger	GLIPR2	100	11.0778	11.5311	11.0894	11.2932	11.1603	11.124	10.162	10.5354	10.9564	11.0604	10.5485	10.5448	11.0137	11.1315	10.7069	10.5434	11.1333	10.6681	9.92152	10.6838	10.074	9.88838	10.2727	9.85473
3	M3 UpD0-D3.0h MYD88_INF ZincFinger	GNB5	100	9.5276	9.5233	9.81137	8.71981	8.91017	8.91652	8.63516	8.57557	8.94884	8.69566	8.66962	8.82907	8.81245	8.92566	9.13815	8.73164	8.70724	8.93364	8.51872	8.61169	8.65727	8.64774	8.39826	8.49384
3	M3 UpD0-D3.0h MYD88_INF ZincFinger	GPSM1	100	8.53377	9.02913	9.07592	8.53987	9.28116	9.10358	8.1552	8.66801	8.68746	8.33984	8.67038	8.5321	8.30836	8.64883	8.66867	8.22964	8.38721	8.25894	8.04681	8.4198	8.15993	7.9687	8.2278	8.10466
3	M3 UpD0-D3.0h MYD88_INF ZincFinger	HKR1	100	9.27513	9.0713	9.18947	8.5381	8.53401	8.68035	8.24667	8.67149	8.51703	8.676	8.56981	8.62736	8.48674	8.59499	8.58044	8.46122	8.62404	8.50389	8.31922	8.41405	8.44378	8.50969	8.2715	8.41029
3	M3 UpD0-D3.0h MYD88_INF ZincFinger	HS.154948	100	8.58038	8.64151	8.51228	8.09037	8.13258	8.08982	7.98807	8.01925	8.14071	8.05865	8.12311	8.07092	8.11476	8.06962	8.2164	8.13719	8.22754	8.08713	8.0319	8.08571	8.03013	7.94222	8.03423	8.09833
3	M3 UpD0-D3.0h MYD88_INF ZincFinger	HS.294603	100	10.815	10.6418	10.4493	9.81393	10.393	10.0197	9.31265	10.1971	9.59051	9.75475	10.1389	9.62807	9.86987	9.89401	9.90677	9.66877	9.57215	9.53949	9.61369	9.79921	9.30325	9.47257	9.97599	9.34571
3	M3 UpD0-D3.0h MYD88_INF ZincFinger	HS.445036	100	9.7376	9.51118	9.65183	9.40748	9.32452	9.21478	8.70502	9.2965	9.42587	9.56836	9.3813	9.11328	9.32498	9.24899	9.09492	9.27253	9.25958	9.05547	9.09775	9.11609	9.06927	9.06111	9.04233	9.20358
3	M3 UpD0-D3.0h MYD88_INF ZincFinger	HS.445581	100	8.80313	9.12368	8.52591	8.28997	8.38834	8.18065	7.9693	8.10059	8.16324	8.44681	8.158	8.11117	8.27841	8.04231	8.09965	8.03351	8.14696	7.99031	8.07972	8.0427	8.05234	8.04191	8.08096	7.96764
3	M3 UpD0-D3.0h MYD88_INF ZincFinger	HS.567759	100	9.50696	9.68609	9.38263	8.7316	9.2848	9.2232	8.5589	8.74075	8.71401	8.64385	8.84935	8.62172	8.55864	8.67141	8.74343	8.73542	8.60292	8.61519	8.63292	8.58553	8.74123	8.6192	8.7232	8.63995
3	M3 UpD0-D3.0h MYD88_INF ZincFinger	HS.568329	100	8.96735	9.18575	9.09953	8.725	8.62874	8.70107	8.11256	8.37883	8.36221	8.18645	8.35475	8.20402	8.35323	8.23523	8.19359	8.11599	8.28364	8.22845	8.1767	8.13279	8.1721	8.49725	8.23113	8.10902
3	M3 UpD0-D3.0h MYD88_INF ZincFinger	HS.5724	100	9.7948	9.37058	9.62214	9.13383	9.23223	9.25293	8.16691	9.05996	9.07508	8.95888	9.18718	8.90932	9.17644	9.03409	9.17633	8.84189	8.9717	9.02248	8.40268	8.58055	8.50155	8.67086	8.5407	8.72097
3	M3 UpD0-D3.0h MYD88_INF ZincFinger	HS3ST1	100	8.88163	9.04255	8.55323	8.14365	8.01158	8.00055	7.97904	8.09011	7.95661	8.10377	8.20029	8.01484	8.05028	7.99397	7.88273	8.18022	8.02092	7.9688	7.98487	7.97976	7.98159	7.94973	7.89362	8.10153
3	M3 UpD0-D3.0h MYD88_INF ZincFinger	IARS2	100	11.8034	11.5588	11.6503	11.7818	11.839	11.6836	10.9245	11.6289	11.6043	11.5464	11.4604	11.7886	11.499	11.3513	11.5433	11.3635	11.0778	11.3571	11.2478	11.2504	11.4193	11.1309	11.3337	11.4438
3	M3 UpD0-D3.0h MYD88_INF ZincFinger	IFI44	100	9.49135	9.91551	9.76403	9.74068	9.8066	9.84704	8.28399	9.12559	9.26597	9.15957	9.11025	9.00243	8.93471	8.65915	8.5965	8.58451	8.48485	8.21841	8.33048	8.18423	8.23035	8.15612	8.1359	8.15502
3	M3 UpD0-D3.0h MYD88_INF ZincFinger	IFIT1	100	9.29273	8.79962	9.24681	8.49163	8.56036	8.5238	7.98748	8.26158	8.39498	8.28555	8.23637	8.39782	8.19705	8.0672	8.25806	8.1174	7.9941	8.07955	8.11054	7.97134	8.08245	7.94494	8.05355	8.19975
3	M3 UpD0-D3.0h MYD88_INF ZincFinger	IFIT2	100	10.2215	9.62277	9.77565	9.17356	9.44151	9.65414	8.23001	8.74289	9.19746	9.37448	8.41706	8.91538	8.43311	8.35338	8.65463	8.36377	8.563	8.51288	8.16139	8.49676	8.49254	8.01295	8.25359	8.22237
3	M3 UpD0-D3.0h MYD88_INF ZincFinger	IFT57	100	10.9641	11.325	11.2569	8.68325	8.89382	8.78397	8.09908	8.7965	8.44106	8.72113	8.96998	8.49425	8.57662	8.72355	8.62479	8.58932	8.55366	8.43693	8.25605	8.43207	8.42291	8.41411	8.46378	8.3782
3	M3 UpD0-D3.0h MYD88_INF ZincFinger	ITGAM	100	9.96034	9.52009	9.90001	8.72147	8.71239	8.58973	8.2532	8.29537	8.57321	8.58562	8.5168	8.60012	8.39223	8.37075	8.5094	8.31784	8.33968	8.24189	8.13357	8.26562	8.26915	8.04369	8.29505	8.31784
3	M3 UpD0-D3.0h MYD88_INF ZincFinger	ITPR1	100	11.2979	11.6265	11.1108	9.97173	10.2835	10.2521	9.19013	9.92409	9.87712	9.62651	9.75241	9.85029	9.56436	9.63998	9.77747	9.44341	9.71101	9.73522	9.27945	9.57026	9.37933	9.71855	9.47515	9.16183
3	M3 UpD0-D3.0h MYD88_INF ZincFinger	JAZF1	100	10.898	10.7109	10.9733	9.77735	9.02081	9.84107	8.29773	8.5707	9.42018	9.43877	8.67141	8.98172	8.81502	8.57805	9.14049	8.60352	8.45449	9.04255	8.25529	8.29502	8.5917	8.35877	8.15053	8.35877
3	M3 UpD0-D3.0h MYD88_INF ZincFinger	JUND	100	13.9136	14.0429	14.3009	13.7923	13.7742	13.7449	12.7415	13.5455	14.1251	13.8447	13.5135	13.4939	13.4896	13.5363	13.4274	13.4849	13.7258	13.4523	13.1482	13.5408	13.3204	13.2304	13.473	13.0848
3	M3 UpD0-D3.0h MYD88_INF ZincFinger	KCNG1	100	10.418	11.6584	10.5033	8.70248	8.98478	8.56624	8.11256	8.49725	8.39292	8.43257	8.37377	8.30451	8.29054	8.35454	8.30318	8.22166	8.23144	8.38064	8	8.03741	8.04775	8.27965	8.12771	8.17931
3	M3 UpD0-D3.0h MYD88_INF ZincFinger	KIAA1147	100	10.7942	10.7547	10.8463	9.74677	9.94669	10.1028	8.73564	9.49424	9.79131	9.45222	9.34854	9.52406	9.37697	9.25087	9.46494	9.16223	9.08157	9.28662	8.63287	8.95362	8.89874	8.84428	8.88174	8.74127
3	M3 UpD0-D3.0h MYD88_INF ZincFinger	KIAA1328	100	8.54048	8.72558	8.60936	8.15097	8.34282	8.20308	7.97188	8.32108	8.24044	8.30841	8.11844	8.31209	8.23906	8.20732	8.26457	8.16951	8.27129	8.13596	8.0507	8.06904	8.16667	8.07875	8.07128	8.09905
3	M3 UpD0-D3.0h MYD88_INF ZincFinger	KLF11	100	9.76349	9.63517	9.95602	8.48612	8.83386	8.95275	8.02996	8.30516	8.4484	8.34032	8.41345	8.32882	8.37426	8.59387	8.66497	8.34432	8.41616	8.46922	8.20386	8.31962	8.38735	8.12729	8.22587	8.20083
3	M3 UpD0-D3.0h MYD88_INF ZincFinger	L3MBTL3	100	9.79796	9.4924	10.2017	8.64124	8.50892	8.8349	8.05963	8.30929	8.32245	8.40898	8.32327	8.40409	8.38129	8.60087	8.59486	8.31534	8.36255	8.42027	8.09091	8.25176	8.14749	8.15005	8.19225	8.0974
3	M3 UpD0-D3.0h MYD88_INF ZincFinger	LOC388692	100	8.79972	8.98552	8.5022	8.35915	8.36012	8.1978	8.01696	8.11287	8.0828	8.1048	8.20192	8.04348	8.10825	8.06914	7.97064	8.01946	8.11006	7.94029	8.00674	8.01834	7.96125	8.05922	8.0607	7.97234
3	M3 UpD0-D3.0h MYD88_INF ZincFinger	LOC400464	100	9.18878	9.0064	9.28195	8.6333	8.91395	8.64365	8.09383	8.68369	8.72935	8.70528	8.68493	8.58846	8.53621	8.53981	8.48887	8.55886	8.39015	8.43677	8.40091	8.30924	8.35998	8.46203	8.28757	8.32873
3	M3 UpD0-D3.0h MYD88_INF ZincFinger	LOC401677	100	8.90216	9.43241	9.11987	8.86358	8.83604	8.7108	8.39235	8.90567	8.61169	8.80436	8.81342	8.62933	8.6449	8.82953	8.73289	8.5941	8.563	8.48409	8.57321	8.63765	8.4148	8.43541	8.52811	8.30825
3	M3 UpD0-D3.0h MYD88_INF ZincFinger	LOC403323	100	10.3852	9.79657	9.69076	9.35211	9.70326	9.44923	9.06927	9.67687	9.68791	9.57738	9.6563	9.63342	9.39068	9.26597	9.5608	9.2137	9.20763	9.28201	8.88555	9.19776	8.9845	8.68325	8.85309	8.81736
3	M3 UpD0-D3.0h MYD88_INF ZincFinger	LOC641750	100	8.86523	10.1066	9.49536	8.94593	8.97579	9.13895	8.2966	9.07867	9.28516	8.80587	9.12849	9.00473	8.63683	8.66271	8.79427	8.84389	8.79412	8.87531	8.71868	8.63453	8.80165	8.64405	8.65722	8.63178
3	M3 UpD0-D3.0h MYD88_INF ZincFinger	LOC644033	100	11.6575	11.5832	11.9945	10.9503	10.4541	10.6636	9.54394	10.7352	10.8343	11.1119	10.7998	10.6463	10.6413	9.9454	10.4235	10.5618	9.91489	10.2641	10.4503	9.92963	10.0126	10.2403	9.79464	10.0086
3	M3 UpD0-D3.0h MYD88_INF ZincFinger	LOC645737	100	8.59829	9.41757	9.17777	8.75239	8.73449	8.91229	8.10691	8.73413	8.84125	8.72623	8.77367	8.64686	8.50381	8.75046	8.53537	8.67113	8.64262	8.55672	8.69039	8.54894	8.76106	8.48709	8.54626	8.62265
3	M3 UpD0-D3.0h MYD88_INF ZincFinger	LOC648659	100	9.52088	10.6726	10.3077	9.27217	9.37326	9.51134	8.34655	9.24058	9.49561	9.07016	9.42126	9.38053	9.00829	9.28357	9.42913	9.25667	9.15868	9.0487	9.39576	9.07556	9.1609	9.19319	9.02169	9.16978
3	M3 UpD0-D3.0h MYD88_INF ZincFinger	LOC650826	100	8.85246	8.9779	8.73335	8.45083	8.55129	8.47116	8.17141	8.55753	8.55337	8.62056	8.41036	8.50886	8.33228	8.23035	8.38819	8.30678	8.30439	8.30196	8.3541	8.25832	8.21741	8.21916	8.29204	8.20418
3	M3 UpD0-D3.0h MYD88_INF ZincFinger	LOC728802	100	8.34846	9.04168	8.62633	8.21223	8.21313	8.26799	8.10966	8.47876	8.34675	8.186	8.45976	8.3161	8.18921	8.11069	8.45693	8.1968	8.30501	8.31904	8.20485	8.12171	8.09968	8.17189	8.10249	8.13697
3	M3 UpD0-D3.0h MYD88_INF ZincFinger	LOC728831	100	8.25176	8.85299	8.55834	8.20333	8.1426	8.23133	8.09133	8.07351	8.10268	8.11968	8.18768	8.23241	8.02089	8.09817	8.17016	8.08964	8.17708	8.05243	8.03404	8.12446	8.12386	8.08623	8.06855	8.07676
3	M3 UpD0-D3.0h MYD88_INF ZincFinger	LOC730256	100	9.82378	9.97035	9.99484	9.16054	8.54543	8.58973	8.14652	8.26158	8.30397	8.32999	8.38349	8.34028	8.35323	8.28447	8.25702	8.21941	8.18999	8.19389	8.04568	8.25236	8.00808	8.02671	8.04615	8.04112
3	M3 UpD0-D3.0h MYD88_INF ZincFinger	LOC92497	100	8.82722	8.6511	8.96314	8.33189	8.44364	8.3657	8.04685	8.51162	8.30528	8.32449	8.5004	8.3679	8.33476	8.40486	8.31636	8.31892	8.1993	8.32849	8.26541	8.43806	8.20817	8.21379	8.20639	8.15811
3	M3 UpD0-D3.0h MYD88_INF ZincFinger	LPP	100	12.0957	11.7241	12.0633	10.8641	11.1062	10.9569	10.1557	10.8033	10.7945	10.6543	11.0169	10.8817	10.8822	10.7397	11.1119	10.2328	10.5403	10.875	9.54798	10.2365	10.1952	10.1488	9.92449	10.0037
3	M3 UpD0-D3.0h MYD88_INF ZincFinger	LYN	100	13.3535	13.2532	13.3845	13.138	13.5911	13.3698	12.193	13.129	13.4501	13.0544	13.1202	13.3655	12.9834	13.2814	13.4253	12.8016	13.3101	13.3698	12.4286	13.0762	12.9353	12.5618	12.7127	12.2827
3	M3 UpD0-D3.0h MYD88_INF ZincFinger	LYRM7	100	10.3963	10.3537	10.3979	9.5767	9.88269	9.76737	8.14828	9.68011	9.53512	9.44298	9.59475	9.59529	9.7717	9.45128	9.72161	9.7728	9.31289	9.55335	9.58846	9.19517	9.32099	9.41123	9.28889	9.10386
3	M3 UpD0-D3.0h MYD88_INF ZincFinger	MAP2K5	100	9.36973	9.397	9.12458	8.86497	8.92961	8.71794	8.33616	8.97693	8.69398	8.7328	8.7801	8.75418	8.58827	8.54759	8.61081	8.41564	8.45934	8.4065	8.22941	8.71653	8.44083	8.51515	8.76546	8.43865
3	M3 UpD0-D3.0h MYD88_INF ZincFinger	MAP4K4	100	9.70848	9.56377	9.56983	9.03619	8.84883	9.12499	8.66951	8.54216	8.83637	8.9361	8.70018	8.87574	9.06276	8.72611	8.95935	8.93963	8.57786	8.81128	8.62887	8.35582	8.65141	8.44673	8.29721	8.38347
3	M3 UpD0-D3.0h MYD88_INF ZincFinger	MARCH3	100	10.2235	10.8574	10.2745	10.1781	9.99522	10.0855	9.00684	9.34514	9.76797	9.69222	9.26992	9.5901	9.43508	9.27446	9.34245	9.16172	9.1899	9.13292	9.32894	9.0098	8.88989	9.16593	8.85001	8.64843
3	M3 UpD0-D3.0h MYD88_INF ZincFinger	MGEA5	100	13.4681	13.0002	13.233	12.0633	12.4518	12.3573	10.5758	12.2173	12.0672	12.1447	12.1425	12.4063	12.2409	12.0975	12.2827	12.0298	12.121	12.2764	11.9227	11.9641	11.7694	12.3249	12.1568	11.8947
3	M3 UpD0-D3.0h MYD88_INF ZincFinger	MOB3B	100	9.72308	10.1344	10.1237	8.44492	8.50411	8.69301	8.10837	8.55678	8.52308	8.66072	8.56316	8.65361	8.35794	8.2685	8.60676	8.13827	8.28388	8.38972	8.00335	8.23515	8.16888	7.98154	8.1875	8.0283
3	M3 UpD0-D3.0h MYD88_INF ZincFinger	MTCP1	100	10.2605	11.0156	10.7967	10.7967	10.885	10.622	9.41692	10.6836	10.5527	10.4478	10.684	10.459	10.4813	10.5341	10.5739	10.3325	10.5203	10.3934	10.2176	10.1453	10.3649	10.4131	10.2037	10.295
3	M3 UpD0-D3.0h MYD88_INF ZincFinger	MTSS1	100	11.8247	11.9488	11.6538	10.9152	11.2606	11.2286	10.361	11.3741	11.2879	11.2859	11.2589	11.3448	10.846	10.9815	10.8091	10.5044	10.8988	10.4629	9.75662	10.3568	9.74817	10.0898	10.2213	9.4052
3	M3 UpD0-D3.0h MYD88_INF ZincFinger	MX1	100	13.4231	13.3304	13.3077	11.6973	11.6957	11.9555	10.7411	11.5695	12.1748	11.8458	11.4516	11.8751	11.1438	11.1062	11.1702	11.323	12.182	11.5327	11.439	12.2083	11.0898	11.4474	11.6258	10.7577
3	M3 UpD0-D3.0h MYD88_INF ZincFinger	MYOM1	100	9.46345	8.96755	9.06591	8.27771	8.36138	8.31048	8.0432	8.40054	8.22849	8.10804	8.1466	8.28703	8.36842	8.27257	8.31605	8.08134	8.17141	8.33796	8.02146	8.28551	8.1745	8.23832	8.12174	8.1771
3	M3 UpD0-D3.0h MYD88_INF ZincFinger	NAT6	100	9.13928	9.40832	9.1402	8.86772	8.8075	8.61489	8.18687	8.64376	8.31574	8.52585	8.83933	8.56743	8.48283	8.4014	8.51928	8.26705	8.51188	8.31904	8.21253	8.6863	8.38375	8.42311	8.74546	8.52771
3	M3 UpD0-D3.0h MYD88_INF ZincFinger	NCK2	100	11.876	12.5946	12.6198	11.8458	11.6091	11.8141	10.7334	11.3036	12.0153	11.692	11.1787	11.6028	11.292	10.9154	11.4998	10.8943	10.7652	10.8998	10.4656	10.434	10.4788	10.9761	10.1505	10.5868
3	M3 UpD0-D3.0h MYD88_INF ZincFinger	NEIL2	100	9.24886	9.52795	9.41233	8.97333	9.33349	9.03278	8.63153	8.9149	8.99755	8.8158	9.04755	8.91729	8.94044	8.96039	9.13895	8.84232	8.97587	8.76141	8.65543	8.86301	8.71773	8.45747	8.63689	8.42263
3	M3 UpD0-D3.0h MYD88_INF ZincFinger	NEPRO	100	9.32439	9.37562	9.20393	8.42381	8.47986	8.57757	7.97274	8.20245	8.29715	8.26675	8.42529	8.28277	8.27147	8.19521	8.49066	8.26652	8.24218	8.20356	8.34404	8.23241	8.35632	8.23739	8.24862	8.10111
3	M3 UpD0-D3.0h MYD88_INF ZincFinger	NOTCH2	100	9.74806	10.1402	10.0166	9.01715	9.26942	9.40512	8.62157	9.43282	9.25981	9.42151	9.56349	9.40784	9.13823	9.16669	9.01684	9.11197	9.02699	9.01966	8.59201	9.07834	8.95303	8.49784	8.94477	8.78397
3	M3 UpD0-D3.0h MYD88_INF ZincFinger	NUDT7	100	9.69059	10.0282	9.81993	9.65461	9.84355	9.75396	8.1327	9.17339	9.05204	9.11339	9.24839	9.15665	9.25509	9.19202	9.18957	8.9214	9.20885	9.08061	8.66271	9.07251	8.52363	8.77473	8.67348	8.50517
3	M3 UpD0-D3.0h MYD88_INF ZincFinger	NUP88	100	12.2301	13.1325	12.7099	12.41	12.1131	12.3879	11.4579	11.4126	11.8912	11.9769	11.6844	11.6905	11.8723	11.7455	12.0115	11.7334	11.6689	11.6289	11.453	11.4868	11.6398	11.2284	11.4638	11.3921
3	M3 UpD0-D3.0h MYD88_INF ZincFinger	OAS3	100	8.56172	8.80147	8.5266	8.84283	9.10645	8.83209	8.11284	8.74205	8.68492	8.58404	8.68151	8.52757	8.50068	8.42049	8.57662	8.31281	8.58737	8.2963	8.14067	8.43404	8.12386	8.35025	8.32778	8.1068
3	M3 UpD0-D3.0h MYD88_INF ZincFinger	PADI4	100	8.6869	8.5098	8.81293	8.35638	8.90138	9.19963	8.07701	8.79199	8.91729	8.3367	8.70028	8.84544	8.40242	8.69372	8.86961	8.39385	8.60533	8.67522	8.0517	8.52515	8.4024	8.20132	8.27044	8.22559
3	M3 UpD0-D3.0h MYD88_INF ZincFinger	PAQR7	100	8.74289	8.42126	8.56204	8.63178	8.6278	8.49475	8.00509	8.31278	8.14175	8.3647	8.32608	8.37304	8.41963	8.13805	8.34943	8.27135	8.43999	8.24876	8.13357	8.3557	8.11504	8.18335	8.05584	8.02763
3	M3 UpD0-D3.0h MYD88_INF ZincFinger	PAQR8	100	9.58038	9.54335	9.08604	9.02229	9.40333	8.68315	8.05225	9.49888	8.43364	9.05213	9.19291	8.69784	8.83728	8.99065	8.82778	8.69308	8.84224	8.45357	8.25105	8.52322	8.20687	8.249	8.36429	8.09189
3	M3 UpD0-D3.0h MYD88_INF ZincFinger	PARP12	100	11.4474	11.4286	11.3401	9.7668	10.0264	9.69477	9.53196	9.67008	9.83297	9.73847	9.64997	9.85656	9.08402	9.67772	9.67787	8.91322	9.82801	9.40939	8.71029	9.35902	8.80895	8.29285	9.19776	8.4877
3	M3 UpD0-D3.0h MYD88_INF ZincFinger	PATJ	100	10.297	10.2474	9.70686	8.46038	8.36711	8.5059	8.04477	8.39219	8.33858	8.33073	8.41829	8.37428	8.27504	8.47465	8.46199	8.28841	8.12035	8.23767	8.21126	8.03321	8.21792	8.33237	8.35088	8.13225
3	M3 UpD0-D3.0h MYD88_INF ZincFinger	PAXIP1-AS2	100	8.9756	8.50564	8.83227	8.14876	8.46849	8.287	7.98807	8.31531	8.44384	8.20306	8.12513	8.48631	8.18962	8.27807	8.5059	8.04705	8.15627	8.40505	7.99729	8.14812	8.16977	8.04868	8.03382	8.10902
3	M3 UpD0-D3.0h MYD88_INF ZincFinger	PDE4B	100	11.0819	11.5333	11.1199	10.3803	9.7442	10.5667	9.18509	9.70697	9.90098	9.9162	9.79085	9.8498	9.74977	9.83116	9.86169	9.662	10.0544	9.57493	9.51034	9.89198	9.57373	9.6619	10.0316	9.66085
3	M3 UpD0-D3.0h MYD88_INF ZincFinger	PELI2	100	9.47069	9.54483	9.41962	8.49629	9.15406	8.80182	8.03307	8.6892	8.60505	8.42833	8.88639	8.52326	8.3489	8.77501	8.5076	8.20547	8.52215	8.49443	7.9469	8.27483	8.10054	8.24713	8.1282	8.10111
3	M3 UpD0-D3.0h MYD88_INF ZincFinger	PEX5	100	11.0371	10.8988	11.1039	10.8805	11.3223	11.1073	10.1065	11.1028	10.814	10.7662	11.1287	10.9753	10.7416	10.6956	10.6131	10.7403	10.7281	10.7533	10.4691	10.9421	10.612	10.2866	10.6155	10.557
3	M3 UpD0-D3.0h MYD88_INF ZincFinger	PIGC	100	10.3489	10.4394	10.1521	9.43156	9.43511	9.33666	9.04567	9.59417	8.89437	9.54773	9.6401	9.34148	9.45391	9.32536	9.10422	9.30823	9.33966	9.13061	9.16215	9.307	9.07938	9.15531	9.25675	9.04538
3	M3 UpD0-D3.0h MYD88_INF ZincFinger	PIK3R1	100	10.292	9.987	10.4101	9.80923	9.69179	9.5014	8.85392	9.5597	9.39225	9.60415	9.60777	9.39095	9.55872	9.61713	9.36798	9.52904	9.55195	9.3764	9.40261	9.12938	9.1915	9.52879	9.11852	9.21379
3	M3 UpD0-D3.0h MYD88_INF ZincFinger	PLEKHA1	100	10.3685	10.4237	10.6434	8.23372	8.14263	8.30438	8.0346	8.24526	8.41935	8.25045	8.19245	8.65259	8.32312	8.30821	8.56586	8.29164	8.13056	8.41376	8.18699	8.11792	8.12198	8.1937	7.9968	8.06308
3	M3 UpD0-D3.0h MYD88_INF ZincFinger	POMT2	100	8.94075	8.82293	8.85037	8.32873	8.63758	8.39638	8.09857	8.61467	8.57999	8.41904	8.52966	8.44287	8.38851	8.43384	8.49591	8.2888	8.35691	8.36845	8.19274	8.23063	8.12386	8.13638	8.16887	8.11591
3	M3 UpD0-D3.0h MYD88_INF ZincFinger	PTK2	100	11.0903	11.2374	11.1845	10.9261	11.308	11.0817	9.33186	10.5261	10.6969	10.3903	10.1507	10.368	10.1015	10.3597	10.3324	9.91427	10.3449	10.5758	8.90846	9.83332	9.61839	8.94056	9.20384	8.95623
3	M3 UpD0-D3.0h MYD88_INF ZincFinger	RAB11A	100	11.1708	10.7784	11.1145	10.9991	11.0164	10.7945	8.91183	10.7473	10.616	10.9777	10.9519	10.6877	10.8918	10.831	10.4452	10.7063	10.8211	10.7561	10.3029	10.6295	10.4989	10.2937	10.5587	10.4491
3	M3 UpD0-D3.0h MYD88_INF ZincFinger	RAB11FIP4	100	9.08877	9.34441	9.05954	8.14087	8.06422	8.36714	8.03739	8.31444	8.28456	8.37439	8.28455	8.6595	8.16739	8.16239	8.53672	8.15907	8.11754	8.2886	7.99783	8.08106	8.08055	8.09747	8.03469	8.01063
3	M3 UpD0-D3.0h MYD88_INF ZincFinger	RAB7A	100	12.803	12.8646	12.4845	12.4063	12.4962	12.3366	11.993	12.3016	12.15	12.111	12.2796	12.0641	12.2631	12.3189	12.1042	12.0887	12.0232	12.0477	11.8441	11.9087	11.7165	11.8133	11.914	11.6474
3	M3 UpD0-D3.0h MYD88_INF ZincFinger	RABGEF1	100	8.88435	9.87843	9.21643	8.66246	8.78869	8.86433	8.36192	8.70584	8.90156	8.58219	8.83118	8.84494	8.60985	8.62279	8.81864	8.69541	8.63351	8.617	8.52279	8.54322	8.67946	8.63038	8.61183	8.60208
3	M3 UpD0-D3.0h MYD88_INF ZincFinger	RARA	100	11.3481	10.8805	11.0718	10.2316	10.1281	9.82688	9.94464	10.2297	10.3986	9.97268	10.0998	9.94235	9.91399	9.87747	9.75207	9.77377	9.93638	9.83563	9.42493	9.97959	9.86546	9.58293	9.83397	9.72194
3	M3 UpD0-D3.0h MYD88_INF ZincFinger	RBM17	100	11.5405	11.4227	11.6784	11.0036	11.422	11.1028	10.6231	11.0917	10.7051	10.9594	11.3664	10.9935	11.0551	11.0476	11.0579	10.9027	10.8704	10.8657	10.4408	10.6699	10.5164	10.6413	10.7134	10.1879
3	M3 UpD0-D3.0h MYD88_INF ZincFinger	RBMS1	100	9.36507	9.46408	9.30456	8.78935	8.65293	8.51899	8.24521	8.51219	8.43692	8.75366	8.49172	8.38615	8.30775	8.22775	8.20874	8.08439	8.43605	8.3232	8.10324	8.38994	8.26465	8.06906	8.2056	8.13896
3	M3 UpD0-D3.0h MYD88_INF ZincFinger	RBPMS2	100	9.50696	8.052	8.25311	8.24823	8.10986	8.14838	7.96574	8.14229	8.40231	8.51111	8.11458	8.28656	8.08614	7.9689	7.97703	8.00968	7.92246	7.98137	8.0319	7.93177	7.88042	7.91941	7.86851	7.91788
3	M3 UpD0-D3.0h MYD88_INF ZincFinger	RETREG1	100	9.19675	9.24178	9.14607	8.63178	8.59439	8.71166	8.00528	8.31767	8.49424	8.37848	8.25791	8.41163	8.5372	8.53236	8.50191	8.47338	8.28667	8.37019	8.16105	8.22245	8.21714	8.14942	8.03547	8.06512
3	M3 UpD0-D3.0h MYD88_INF ZincFinger	RINL	100	10.4956	10.7325	10.8671	10.417	10.644	10.6322	10.232	10.4969	10.4889	10.1708	10.3689	10.4706	9.96168	10.0613	10.3766	9.80643	10.0425	10.3278	9.55648	9.90814	9.83297	9.88207	9.86677	9.73282
3	M3 UpD0-D3.0h MYD88_INF ZincFinger	RNF144B	100	8.85603	8.86982	8.80322	8.5022	8.75118	8.63824	7.99856	8.46356	8.29525	8.38831	8.43278	8.50918	8.2845	8.41895	8.48983	8.1737	8.53679	8.3129	8.00625	8.39991	8.18725	8.05264	8.19196	8.03005
3	M3 UpD0-D3.0h MYD88_INF ZincFinger	RPL12P18	100	8.71694	9.45163	8.83182	8.8406	8.82557	8.59999	8.14191	8.73212	8.67045	8.58044	8.72718	8.52387	8.56282	8.77145	8.46621	8.4159	8.69791	8.36386	8.54744	8.53476	8.36963	8.42429	8.58745	8.43712
3	M3 UpD0-D3.0h MYD88_INF ZincFinger	RPL22	100	12.6937	12.7445	12.5734	11.7147	12.0186	11.6983	10.4008	11.6331	11.4617	11.7664	11.6767	11.5205	11.5761	11.3786	11.4178	11.3804	11.2808	11.3461	11.0835	10.8315	11.1177	11.4101	10.8134	10.9893
3	M3 UpD0-D3.0h MYD88_INF ZincFinger	RPL23AP45	100	9.30606	9.05165	9.00643	8.59233	8.51143	8.48694	8.18782	8.90397	8.63567	8.64324	8.63773	8.50548	8.41372	8.19396	8.36981	8.32203	8.08673	8.25732	8.35632	8.16799	8.20945	8.1676	8.05909	8.26598
3	M3 UpD0-D3.0h MYD88_INF ZincFinger	RPL37	100	8.91641	8.99991	9.05666	8.71773	8.82312	8.5015	8.32703	8.55273	8.55361	8.66029	8.65243	8.5181	8.65672	8.46702	8.52867	8.43739	8.4531	8.59017	8.42726	8.45039	8.43047	8.51754	8.38163	8.30998
3	M3 UpD0-D3.0h MYD88_INF ZincFinger	RPL5P6	100	9.21422	10.2803	9.72241	9.28626	9.3583	9.36018	8.47876	9.43656	9.25305	9.08498	9.37315	9.14657	8.9254	9.00768	8.88728	8.84935	9.14313	8.72392	9.03725	8.99239	8.85799	8.93603	8.80804	8.96242
3	M3 UpD0-D3.0h MYD88_INF ZincFinger	RPL7P16	100	8.62924	9.08348	8.73533	8.47397	8.56327	8.446	8.14434	8.56021	8.41618	8.43541	8.6065	8.49015	8.38728	8.3958	8.34025	8.34455	8.49759	8.24208	8.31972	8.34478	8.34128	8.25707	8.39703	8.25192
3	M3 UpD0-D3.0h MYD88_INF ZincFinger	RPL7P8	100	8.96476	10.0262	9.57395	9.12954	9.30971	9.34888	8.18687	8.984	9.08838	9.0002	9.18021	8.97385	8.82186	8.94823	8.95785	8.78206	8.86057	8.87133	8.93869	8.85106	8.82879	8.81793	8.77858	8.73024
3	M3 UpD0-D3.0h MYD88_INF ZincFinger	RPS12P11	100	8.99869	9.88912	9.46393	8.93631	9.00366	9.0325	8.13159	8.84612	8.98853	8.80551	8.79658	8.86961	8.6965	8.87397	8.87143	8.70517	8.90305	8.63949	8.67808	8.73578	8.78389	8.65828	8.76156	8.63415
3	M3 UpD0-D3.0h MYD88_INF ZincFinger	RPS2P20	100	10.502	10.9413	10.665	10.0075	10.2172	10.195	9.66609	10.4012	10.2557	10.1176	10.3846	10.3389	9.89735	10.0896	10.2899	9.94814	9.96834	9.88637	10.192	10.0359	9.93772	10.1502	9.78686	9.66578
3	M3 UpD0-D3.0h MYD88_INF ZincFinger	RPS3AP5	100	8.70061	9.59853	9.31902	8.8847	8.91845	8.90641	8.0758	8.71231	8.76133	8.58631	8.69506	8.59256	8.48283	8.52554	8.61108	8.65202	8.54949	8.56275	8.71686	8.48903	8.60114	8.49784	8.49952	8.69438
3	M3 UpD0-D3.0h MYD88_INF ZincFinger	SCML1	100	8.74576	8.96392	8.99755	9.26553	9.32399	9.34166	8.24567	8.59124	8.99645	8.61818	8.51056	8.64686	8.37598	8.57361	8.60306	8.50199	8.61843	8.58938	8.61536	8.39112	8.44958	8.86226	8.39981	8.35951
3	M3 UpD0-D3.0h MYD88_INF ZincFinger	SELENON	100	9.0957	8.84762	8.94551	8.44318	8.46434	8.56933	8.19345	8.64114	8.71965	8.66172	8.578	8.64185	8.36493	8.2765	8.45954	8.14535	8.06507	8.16289	7.96914	8.03509	7.96895	7.95262	7.95842	7.92425
3	M3 UpD0-D3.0h MYD88_INF ZincFinger	SERBP1	100	11.6043	11.3507	11.1457	11.2102	11.5832	11.1185	9.81863	11.1816	11.0104	11.4286	11.2273	11.0215	11.1165	10.9431	11.119	11.0339	10.6491	10.7597	10.6751	10.5986	10.588	10.4399	10.6413	10.3546
3	M3 UpD0-D3.0h MYD88_INF ZincFinger	SERTAD2	100	12.5917	11.8974	12.1679	11.4983	11.5285	11.3373	11.2421	11.9546	11.6174	11.9676	11.75	11.7492	11.5553	11.4762	11.5304	11.3201	11.2932	11.1731	11.0741	11.0159	10.8055	11.4294	10.7888	10.4373
3	M3 UpD0-D3.0h MYD88_INF ZincFinger	SIRT5	100	9.34631	9.50665	9.30482	9.25771	9.44552	9.37166	8.75175	9.06714	9.10106	8.97937	9.1195	9.02434	9.06511	9.01148	8.90079	8.85363	8.81805	8.81747	8.701	8.99241	8.82338	8.95095	8.88542	8.70765
3	M3 UpD0-D3.0h MYD88_INF ZincFinger	SKP1	100	10.631	10.8523	10.7537	10.1566	10.1327	10.1824	9.71273	10.3733	10.1657	10.5483	10.2909	10.083	10.156	9.75836	9.95739	10.0312	9.70156	9.70145	9.7104	9.68508	9.69497	9.5482	9.70234	9.50386
3	M3 UpD0-D3.0h MYD88_INF ZincFinger	SLAIN2	100	8.84381	8.93063	8.77689	8.36898	8.57118	8.39917	8.04889	8.25817	8.23125	8.21948	8.36527	8.3102	8.51557	8.32744	8.3632	8.45506	8.23437	8.28925	8.35222	8.28653	8.2883	8.35447	8.19481	8.28394
3	M3 UpD0-D3.0h MYD88_INF ZincFinger	SLC16A5	100	9.05185	8.61854	8.88989	8.35596	8.38528	8.28123	8.05225	8.23149	8.16661	8.08598	8.32303	8.28928	8.41963	8.41895	8.3315	8.15597	8.3969	8.22923	8.08026	8.39677	8.22849	8.26141	8.15686	8.01374
3	M3 UpD0-D3.0h MYD88_INF ZincFinger	SLC25A38	100	9.90277	9.6711	9.46965	8.99544	9.49135	9.02956	8.60365	9.47827	9.21023	9.08213	9.26668	9.07707	8.95334	9.15416	9.16357	8.86301	8.98572	8.82136	8.81555	9.01769	8.86441	8.60166	8.6927	8.48064
3	M3 UpD0-D3.0h MYD88_INF ZincFinger	SMARCC1	100	12.0624	11.9769	11.8306	11.595	12.0467	11.7808	10.3746	12.1302	11.9676	11.8186	11.7241	12.0604	11.7294	11.7917	11.9994	11.6113	11.7583	11.6314	11.1432	11.5078	11.661	10.8213	11.3074	11.4364
3	M3 UpD0-D3.0h MYD88_INF ZincFinger	SNORD84	100	8.73032	9.25144	8.93282	8.65543	8.48244	8.34723	8.05225	8.76213	8.48479	8.52937	8.58696	8.38217	8.39438	8.36647	8.40883	8.29273	8.21786	8.22416	8.31317	8.24894	8.22202	8.20999	8.20103	8.23541
3	M3 UpD0-D3.0h MYD88_INF ZincFinger	SNRNP200	100	9.96176	9.98168	9.83315	8.51031	8.64282	8.55528	8.1169	8.72063	8.4473	8.47484	8.68139	8.55839	8.45809	8.65238	8.48215	8.39142	8.48144	8.31845	8.21953	8.35013	8.28945	8.15251	8.30443	8.28673
3	M3 UpD0-D3.0h MYD88_INF ZincFinger	SNRNP48	100	8.51201	8.6476	8.82495	8.46795	8.90362	8.97019	8.03564	8.9419	8.86469	8.39622	8.8726	8.91873	8.28798	8.58311	8.52322	8.29496	8.60271	8.50027	8.3029	8.4912	8.44462	8.19107	8.50605	8.43388
3	M3 UpD0-D3.0h MYD88_INF ZincFinger	SNX11	100	10.9941	11.2381	10.7366	10.9579	10.9564	10.6079	10.4198	10.9066	10.9103	11.162	10.8599	10.7565	10.7893	10.6229	10.5733	10.5892	10.6398	10.632	10.3759	10.862	10.5811	10.3295	10.582	10.6444
3	M3 UpD0-D3.0h MYD88_INF ZincFinger	SNX2	100	13.103	13.2388	13.2045	12.1679	11.9026	11.8751	11.43	11.6413	11.2691	11.6784	11.8287	11.7552	12.0916	11.6019	11.8548	11.5278	11.4396	11.4544	11.3165	11.2547	11.0109	11.4001	11.2828	11.1875
3	M3 UpD0-D3.0h MYD88_INF ZincFinger	SNX27	100	11.1275	10.8569	10.9575	11.0084	10.9728	10.6654	10.4312	11.105	10.3949	10.7334	10.9362	10.6014	10.6136	10.6141	10.1628	10.4587	10.5739	10.2943	10.468	10.6364	10.2309	10.3423	10.5434	10.3842
3	M3 UpD0-D3.0h MYD88_INF ZincFinger	SORL1	100	9.55084	10.4703	9.72273	8.33352	8.8914	8.49285	8.15613	8.89835	8.60226	8.35023	8.85718	8.69783	8.27168	8.50303	8.54944	8.17743	8.32876	8.32935	7.96824	8.19384	8.1743	8.12131	8.04996	8.06431
3	M3 UpD0-D3.0h MYD88_INF ZincFinger	SP140	100	12.3537	11.9908	12.0018	11.7881	12.0144	11.6519	11.4697	11.6197	11.0985	11.2434	11.5917	11.8117	11.7096	11.7223	11.9358	11.1209	11.722	11.6236	10.7998	11.806	11.4839	11.1826	11.6503	11.4659
3	M3 UpD0-D3.0h MYD88_INF ZincFinger	SPAG1	100	8.30913	8.79499	8.41574	8.5094	8.61482	8.39661	8.10204	8.1683	8.16242	8.1048	8.19401	8.12176	8.14963	8.06769	8.16663	8.03814	8.04077	8.11787	8.06874	8.12555	8.09069	8.12418	8.07701	7.96366
3	M3 UpD0-D3.0h MYD88_INF ZincFinger	SPRY1	100	9.20023	9.78248	9.00419	9.34998	9.92066	9.38313	8.21753	8.63508	8.44742	8.35689	8.5135	8.40344	8.2294	8.35598	8.21213	8.18562	8.30883	8.23762	8.1691	8.26109	8.07906	8.27529	8.17729	8.12508
3	M3 UpD0-D3.0h MYD88_INF ZincFinger	SRSF6	100	13.5245	13.5762	13.5503	12.9721	13.266	13.1671	11.7694	13.2304	12.812	13.0883	13.243	12.6718	12.7069	12.7845	13.0208	12.5779	12.9016	12.6274	12.3971	12.9538	12.4649	12.1051	13.2574	12.5416
3	M3 UpD0-D3.0h MYD88_INF ZincFinger	ST6GALNAC3	100	8.63453	8.71048	8.51022	8.31165	8.40416	8.54082	8.06582	8.21739	8.52816	8.08485	8.05204	8.34467	8.12484	8.1604	8.24395	8.04792	8.18631	8.10592	8.04301	8.02006	8.17132	8.26175	8.00859	7.98552
3	M3 UpD0-D3.0h MYD88_INF ZincFinger	SWAP70	100	12.8646	12.9934	12.9302	12.2547	12.1042	12.148	10.6062	11.9239	12.1979	12.0445	11.9917	12.0935	11.9613	11.6036	11.9496	11.7738	11.527	12.0456	11.1282	11.0635	11.5917	11.0406	10.9006	11.422
3	M3 UpD0-D3.0h MYD88_INF ZincFinger	SYPL1	100	12.6576	12.6702	12.6411	10.8532	10.9109	11.0321	10.1386	10.7308	10.8413	10.7984	10.9218	10.8959	10.2873	10.9318	10.9274	9.99225	10.7764	10.8551	9.43238	10.2893	10.0036	9.23953	9.6712	9.52129
3	M3 UpD0-D3.0h MYD88_INF ZincFinger	SYT17	100	8.57142	8.92091	8.63408	8.24349	8.33324	8.16597	7.93423	8.11498	8.12732	8.05897	8.13695	8.14097	8.0641	8.03413	8.05465	8.06382	8.12144	8.12142	8.0319	8.03421	8.08426	7.95265	7.94658	7.9841
3	M3 UpD0-D3.0h MYD88_INF ZincFinger	TCF20	100	10.3649	10.1815	10.1694	9.49871	10.0742	9.53033	8.84819	9.74765	9.49616	9.54761	9.79882	9.39376	9.53224	9.74765	9.28186	9.48091	9.68568	9.45398	9.34344	9.42748	9.19517	9.2975	9.39055	9.05492
3	M3 UpD0-D3.0h MYD88_INF ZincFinger	TGIF2	100	9.96778	9.91911	10.1217	9.91489	10.1319	9.88896	8.9238	9.93042	10.5111	10.215	10.057	9.7964	9.88269	9.67952	9.7187	9.83139	9.66944	9.45486	9.5421	9.47502	9.647	9.41757	9.459	9.5485
3	M3 UpD0-D3.0h MYD88_INF ZincFinger	TMEM18	100	8.95019	9.19764	8.97441	8.30674	8.47971	8.43291	8.06743	8.38348	8.41994	8.34185	8.34033	8.31249	8.33068	8.32469	8.37994	8.26786	8.16913	8.2071	8.20745	8.23561	8.21968	8.21409	8.16153	8.24446
3	M3 UpD0-D3.0h MYD88_INF ZincFinger	TMEM2	100	9.90483	9.92862	9.67472	8.63228	9.86083	9.26477	8.56926	9.24681	9.72909	8.99369	9.36018	8.98487	8.70821	9.1348	8.87659	8.53722	8.85559	8.74961	8.28226	8.53362	8.47265	8.23257	8.26793	8.32709
3	M3 UpD0-D3.0h MYD88_INF ZincFinger	TMEM251	100	10.0547	10.2704	10.03	9.41445	9.47985	9.35801	9.01229	9.59064	9.43575	9.67679	9.70418	9.53903	9.46018	9.37512	9.3267	9.42831	9.37365	9.30079	9.48714	9.29867	9.48042	9.16868	9.29092	9.40687
3	M3 UpD0-D3.0h MYD88_INF ZincFinger	TMEM43	100	11.1015	10.5639	10.7849	10.1385	10.2985	10.3103	9.58935	11.0388	10.7692	10.9766	10.5607	10.4553	10.2689	10.2814	10.1317	10.2126	10.127	10.2176	9.87786	10.0894	9.95208	9.817	9.85846	9.81539
3	M3 UpD0-D3.0h MYD88_INF ZincFinger	TMEM91	100	8.97538	8.73068	9.09856	8.60285	8.65411	8.63118	8.07671	8.6476	8.50906	8.61404	8.78189	8.50711	8.4366	8.62114	8.64732	8.52396	8.52515	8.49024	8.21307	8.43012	8.30376	8.59912	8.47754	8.3349
3	M3 UpD0-D3.0h MYD88_INF ZincFinger	TRAF5	100	10.8016	10.4917	11.21	9.1425	9.03682	9.25547	8.14785	8.87445	9.07311	8.96246	9.07029	9.4186	9.16839	8.94578	9.63907	8.93897	8.93249	9.27132	8.45692	8.56179	8.62987	8.47857	8.35782	8.35286
3	M3 UpD0-D3.0h MYD88_INF ZincFinger	TRAFD1	100	9.4577	9.64511	9.5438	9.27732	9.5421	9.4398	9.2176	9.53949	9.40396	9.24429	9.42029	9.60954	9.30372	9.31039	9.47568	9.00376	9.33259	9.15292	8.84774	9.2028	8.96301	8.5576	8.99133	8.72916
3	M3 UpD0-D3.0h MYD88_INF ZincFinger	TRMT12	100	10.1066	10.7377	10.3604	9.67847	10.0449	9.91583	8.63616	9.68063	9.71661	9.75207	9.9253	9.74438	9.65613	9.60944	9.61052	9.75545	9.83086	9.70104	9.52391	9.47815	9.39588	9.14149	9.50392	9.07903
3	M3 UpD0-D3.0h MYD88_INF ZincFinger	TRMT13	100	10.2293	10.0729	10.3694	9.40156	9.57811	9.35025	8.45212	9.38418	9.51283	9.35648	9.41622	9.55579	9.60404	9.26381	9.36479	9.76294	9.18822	9.42268	9.6216	9.18067	9.31179	9.21791	9.31846	9.39416
3	M3 UpD0-D3.0h MYD88_INF ZincFinger	TSC22D1	100	9.38691	9.33652	9.15024	8.90526	8.75571	8.66413	8.19588	8.51841	8.40007	8.68591	8.51777	8.48709	8.58703	8.49801	8.38862	8.44449	8.54328	8.37149	8.36065	8.55157	8.42949	8.48385	8.35612	8.36738
3	M3 UpD0-D3.0h MYD88_INF ZincFinger	TSPYL5	100	8.86265	9.29703	9.21389	8.61825	8.66113	8.89498	7.91021	8.45256	8.48965	8.40093	8.51777	8.64979	8.42263	8.53344	8.74659	8.46999	8.26861	8.7658	8.17331	8.19805	8.43226	8.08123	8.16364	8.1915
3	M3 UpD0-D3.0h MYD88_INF ZincFinger	UBXN1	100	13.1308	13.5408	13.1671	12.2904	12.4471	12.2432	11.9676	12.4755	12.5151	12.321	12.4709	12.3983	12.0018	12.2301	12.0957	11.9536	12.2093	12.1031	11.7342	12.1687	11.9749	11.7892	11.9252	11.9485
3	M3 UpD0-D3.0h MYD88_INF ZincFinger	UCP2	100	12.5279	12.6471	12.3021	12.1119	11.7271	11.7484	11.0765	11.4279	11.8458	11.6648	11.7038	11.8	11.6905	11.7197	11.6742	11.0414	11.7096	11.6722	10.6415	12.0307	11.422	11.244	11.7169	11.2095
3	M3 UpD0-D3.0h MYD88_INF ZincFinger	UST	100	8.94917	8.93878	8.9835	9.10444	9.36582	9.06898	8.15609	8.36981	8.68977	8.52911	8.69569	8.47904	8.6164	8.31805	8.60032	8.29894	8.19333	8.43806	8.03627	8.00802	8.14851	8.02322	8.04031	7.94951
3	M3 UpD0-D3.0h MYD88_INF ZincFinger	UVRAG	100	10.8061	10.9114	11.0242	9.91131	10.1605	10.1763	9.3349	9.50696	10.0187	9.58224	9.57851	9.74178	9.48562	9.73993	9.75586	9.24093	9.85605	9.58376	8.76546	9.59925	9.44101	8.87434	9.56895	9.19572
3	M3 UpD0-D3.0h MYD88_INF ZincFinger	VNN2	100	11.387	11.033	11.2472	9.99775	10.1285	10.0002	9.42217	9.81159	9.81897	9.41915	9.8381	10.0228	9.73488	9.89667	10.3724	9.50993	10.1108	10.4041	9.3396	9.84704	9.83102	10.0026	9.49871	9.33704
3	M3 UpD0-D3.0h MYD88_INF ZincFinger	VPS33B	100	9.86768	9.88978	9.93925	9.88115	10.2134	9.97299	9.71928	10.0725	9.817	9.69884	10.199	10.0469	9.56701	9.79496	9.88283	9.46148	9.76388	9.67076	9.47886	9.58401	9.57601	9.39849	9.72225	9.44748
3	M3 UpD0-D3.0h MYD88_INF ZincFinger	WDR11	100	10.8723	10.4202	10.6753	9.25586	9.55335	9.47789	8.9214	9.15741	9.34166	9.26659	9.11228	9.33397	9.12084	8.90526	9.3182	9.05396	9.09236	9.10617	9.06783	8.93869	9.07409	8.94299	9.0788	8.9864
3	M3 UpD0-D3.0h MYD88_INF ZincFinger	WFDC21P	100	10.5905	9.27317	10.2147	8.25043	8.12856	8.11893	8.1037	8.24263	8.24631	8.29704	8.17335	8.31325	8.31795	8.09537	8.31506	8.14814	8.17141	8.18703	8.0121	8.05242	8.03534	7.97448	7.99228	7.95501
3	M3 UpD0-D3.0h MYD88_INF ZincFinger	XPO1	100	12.258	11.9536	12.1437	12.0516	12.2865	12.1958	11.0267	11.995	12.1004	11.8707	11.7798	12.3378	12.0456	12.0064	12.3144	11.9391	11.8966	11.8723	11.6701	11.7271	12.0754	11.3392	11.6043	11.7408
3	M3 UpD0-D3.0h MYD88_INF ZincFinger	XYLT2	100	10.7764	10.9231	10.8064	10.5153	10.9766	10.6459	9.27488	10.5974	9.60998	10.5616	10.3604	10.2781	10.432	10.2461	10.0318	10.2835	10.2426	10.0282	10.0607	10.3051	10.1328	10.0573	10.3378	10.0705
3	M3 UpD0-D3.0h MYD88_INF ZincFinger	ZCCHC18	100	9.43338	9.73691	9.61897	8.34592	8.37992	8.34775	8.22566	8.16993	8.25597	8.2807	8.29616	8.22953	8.19861	8.13733	8.27278	8.10134	8.2834	8.19632	8.07647	8.09769	8.1418	8.12606	8.05834	8.13132
3	M3 UpD0-D3.0h MYD88_INF ZincFinger	ZCCHC7	100	12.0094	12.5112	12.3378	11.2123	11.7113	11.2447	9.02169	10.6618	10.2676	10.5395	10.5744	10.6815	10.5705	10.4884	10.6543	10.5041	10.588	10.8019	10.0176	10.4231	10.1911	10.2337	10.5166	10.1127
3	M3 UpD0-D3.0h MYD88_INF ZincFinger	ZFHX3	100	9.17474	9.26173	9.0388	8.75239	8.43785	8.45803	8.13392	8.82259	8.65395	8.65347	8.64893	8.63818	8.57491	8.37377	8.46952	8.30081	8.24889	8.39672	8.00995	8.19361	8.33503	8.16583	8.26901	8.21801
3	M3 UpD0-D3.0h MYD88_INF ZincFinger	ZFP37	100	8.78054	8.98478	8.64316	8.37004	8.46586	8.54117	8.25101	8.37395	8.3536	8.38458	8.47919	8.26371	8.30147	8.28274	8.19048	8.2766	8.30501	8.29114	8.21487	8.2717	8.20108	8.46469	8.267	8.16147
3	M3 UpD0-D3.0h MYD88_INF ZincFinger	ZFP90	100	11.2045	11.2415	10.5735	10.5001	10.7181	10.239	9.00599	10.6717	9.85189	10.5205	10.8118	10.1949	10.3967	10.5247	9.83314	10.1468	10.3925	9.71519	9.8305	10.074	9.15631	10.0576	9.62463	8.99734
3	M3 UpD0-D3.0h MYD88_INF ZincFinger	ZNF232	100	9.5741	9.70566	9.68484	9.45215	9.20673	9.05933	9.31313	9.3373	9.33693	9.34594	9.25223	9.36442	9.51945	9.25062	9.34401	9.43698	9.19058	9.18532	9.34344	9.14001	9.10645	9.02257	8.88666	9.12126
3	M3 UpD0-D3.0h MYD88_INF ZincFinger	ZNF302	100	11.3565	11.3312	11.3942	10.2219	10.4004	9.91551	9.25548	10.4603	10.2088	10.4084	10.1981	10.3869	10.1934	10.0641	10.2162	10.0047	10.0377	9.82832	10.1694	10.0564	9.80968	10.5788	9.9854	10.0729
3	M3 UpD0-D3.0h MYD88_INF ZincFinger	ZNF329	100	10.1243	10.004	10.0396	9.19405	9.12404	8.90999	8.14367	9.23667	9.11562	9.26147	9.06122	8.96141	8.85402	8.98322	8.84631	8.91031	8.99482	8.92033	8.82456	8.90826	8.80347	8.84877	8.88892	8.7328
3	M3 UpD0-D3.0h MYD88_INF ZincFinger	ZNF431	100	9.3271	8.99533	9.31065	8.67978	8.7766	8.87159	8.05797	8.65687	8.82647	8.72999	8.62915	8.68093	8.77399	8.63558	8.73335	8.86424	8.84768	8.68283	8.70549	8.75971	8.59227	8.62391	8.63178	8.58951
3	M3 UpD0-D3.0h MYD88_INF ZincFinger	ZNF439	100	10.5775	10.6703	10.8427	9.34479	9.41327	9.5491	8.24129	9.15056	9.17176	8.94994	9.34066	9.51696	9.18868	9.51673	9.87104	9.21701	9.46655	9.81022	9.13373	9.1663	9.3009	9.4738	9.05051	8.86857
3	M3 UpD0-D3.0h MYD88_INF ZincFinger	ZNF485	100	8.87295	8.99369	8.71967	8.45113	8.67658	8.4942	8.11652	8.29269	8.44508	8.45229	8.29243	8.52279	8.36308	8.32506	8.37439	8.3263	8.29489	8.25663	8.24725	8.14853	8.1898	7.99641	8.17914	8.19331
3	M3 UpD0-D3.0h MYD88_INF ZincFinger	ZNF502	100	8.58642	8.70332	8.48485	8.23772	8.19151	8.01838	8.09908	8.13181	8.09591	8.20173	8.24904	8.03197	8.06969	8.00049	8.10719	8.05634	8.05565	8.12294	8.03404	8.00609	8.06637	8.08782	7.98367	7.97667
3	M3 UpD0-D3.0h MYD88_INF ZincFinger	ZNF514	100	9.54976	8.64809	8.96735	8.6724	8.68283	8.46294	7.96397	8.7476	8.5751	8.55921	8.7064	8.7222	8.75607	8.61536	8.66666	8.66815	8.5651	8.44432	8.4821	8.39728	8.34085	8.67299	8.267	8.27153
3	M3 UpD0-D3.0h MYD88_INF ZincFinger	ZNF525	100	8.9691	8.85299	9.03409	8.59876	8.64883	8.75308	8.08305	8.5155	8.64589	8.5083	8.48659	8.66932	8.48162	8.6696	8.74067	8.53896	8.57791	8.68699	8.45423	8.46652	8.46278	8.59699	8.42562	8.31159
3	M3 UpD0-D3.0h MYD88_INF ZincFinger	ZNF558	100	8.78397	8.98736	8.99958	8.85766	9.02488	8.77539	7.99901	8.77208	8.69955	8.68144	8.68603	8.73109	8.58593	8.49055	8.57094	8.6194	8.50423	8.5504	8.41717	8.37829	8.33001	8.64642	8.38199	8.2203
3	M3 UpD0-D3.0h MYD88_INF ZincFinger	ZNF559	100	11.0991	11.1799	11.4624	9.23149	9.22825	9.30272	8.23159	9.20487	9.09553	9.41496	9.19058	9.40784	9.28729	9.14857	9.36862	9.1347	9.04808	9.31227	9.03229	8.95344	9.04986	9.14313	9.13669	9.00431
3	M3 UpD0-D3.0h MYD88_INF ZincFinger	ZNF689	100	10.7733	10.5866	10.6786	10.2057	10.3534	10.4466	10.2666	10.7403	10.909	10.7731	10.6499	10.7078	10.7392	10.4658	10.5682	10.5996	10.3963	10.6097	10.1332	10.0832	10.449	9.65461	9.87332	9.88358
3	M3 UpD0-D3.0h MYD88_INF ZincFinger	ZNF800	100	11.0154	11.3223	11.2175	10.2019	10.5739	10.3628	10.2309	10.5005	10.674	10.5426	10.8215	10.5066	10.6097	10.1849	10.2411	10.5769	10.3744	10.1501	10.2913	10.2306	10.2848	10.1326	10.5964	10.4019
3	M3 UpD0-D3.0h MYD88_INF ZincFinger	ZNF839	100	9.75951	9.63423	9.86216	9.31534	9.39944	9.19316	8.75417	9.48052	9.04718	9.1524	9.37545	9.16852	9.04627	9.09445	9.08763	9.07339	9.25029	9.02089	8.98409	9.1271	8.95355	9.00111	9.22129	9.08181
3	M3 UpD0-D3.0h MYD88_INF ZincFinger	ZNHIT6	100	10.4585	10.2613	10.4251	10.1109	10.351	10.2789	9.93329	10.2611	10.477	10.4742	10.2281	10.4469	10.2435	9.98579	10.0027	10.1522	10.081	9.96426	9.92954	9.87932	9.96269	9.71052	9.81788	9.68039
3	M3 UpD0-D3.0h MYD88_INF ZincFinger	AK3	98.9899	10.9216	10.4689	10.5183	10.7542	11.3323	11.1309	10.1887	10.694	10.8699	10.4564	10.8671	10.6654	10.4526	10.5068	10.4706	10.3951	10.6628	10.3423	10.3488	10.2691	10.1184	11.2529	10.7305	10.3551
3	M3 UpD0-D3.0h MYD88_INF ZincFinger	ANKRD11	98.9899	11.3172	10.9698	11.0545	10.9723	11.352	11.1714	10.8462	10.9893	11.3587	10.7437	11.2821	10.5341	10.9906	10.9426	10.817	10.8108	10.8709	10.6166	10.7458	10.8145	10.4622	11.1519	10.886	10.4541
3	M3 UpD0-D3.0h MYD88_INF ZincFinger	APOBEC3F	98.9899	11.8934	11.5241	11.5832	10.3444	9.80074	9.75295	9.10493	9.69507	9.73215	10.1033	9.58038	9.58658	9.69384	9.51729	9.3124	9.30992	9.47491	9.55934	9.27658	9.42576	9.19517	9.72704	9.76028	9.48796
3	M3 UpD0-D3.0h MYD88_INF ZincFinger	ASB13	98.9899	8.34783	8.29418	8.31064	8.33639	8.7748	8.51424	8.10419	8.37503	8.31131	8.19072	8.59023	8.32144	8.175	8.0964	8.28113	8.15416	8.10975	8.01396	7.99315	7.94385	7.97779	7.9753	8.0607	7.89407
3	M3 UpD0-D3.0h MYD88_INF ZincFinger	BIRC3	98.9899	12.9538	12.7985	13.0184	13.4002	13.9136	13.2916	12.0083	12.4997	12.7401	12.6532	12.2827	12.5765	12.5203	11.7113	12.3505	12.1179	11.6222	11.9252	11.1108	10.9362	11.0551	11.3236	10.5339	10.5717
3	M3 UpD0-D3.0h MYD88_INF ZincFinger	CBR4	98.9899	10.1138	9.66686	10.0627	9.55436	9.96558	9.46819	8.11483	9.43907	9.18957	9.31157	9.39095	9.31325	9.43282	9.15149	9.34835	9.19111	9.17766	9.28367	9.21102	9.08558	9.09279	9.48347	9.20444	9.30015
3	M3 UpD0-D3.0h MYD88_INF ZincFinger	CCDC115	98.9899	10.238	10.6398	10.346	9.53131	9.62305	9.60964	8.88939	9.55254	9.52448	9.4898	9.75858	9.52391	9.46281	9.41806	9.48515	9.35971	9.46994	9.54947	9.46461	9.32547	9.31227	9.64292	9.15888	9.43615
3	M3 UpD0-D3.0h MYD88_INF ZincFinger	CHCHD6	98.9899	8.47259	8.75445	8.60619	8.72916	8.78829	8.53917	8.47073	8.7842	8.55034	8.61055	8.75538	8.49737	8.32248	8.21531	8.22289	8.20307	8.22941	8.16275	8.21981	8.18813	8.18151	8.01246	8.16685	8.05014
3	M3 UpD0-D3.0h MYD88_INF ZincFinger	CIB1	98.9899	13.5716	13.3718	13.8964	13.4026	13.5288	13.4958	13.083	13.4523	13.211	13.4454	13.3634	13.4047	13.1871	13.2132	13.2233	13.0883	13.2997	13.1629	13.1442	13.0263	13.1202	12.833	12.6966	12.9268
3	M3 UpD0-D3.0h MYD88_INF ZincFinger	COX20	98.9899	10.5986	11.1421	11.0202	9.91413	9.5425	9.66425	9.15384	9.60555	9.40784	10.195	9.8712	9.64732	9.94063	9.5688	9.66845	9.7482	9.38676	9.53638	9.54798	9.12504	9.24025	9.21619	8.84552	9.05624
3	M3 UpD0-D3.0h MYD88_INF ZincFinger	EMC3-AS1	98.9899	9.06296	9.15859	8.86829	8.4907	8.72701	8.54383	8.29078	8.81998	8.63421	8.58524	8.95898	8.49461	8.46122	8.68814	8.78983	8.47159	8.66548	8.54108	8.47749	8.44637	8.47894	8.18291	8.3504	8.25626
3	M3 UpD0-D3.0h MYD88_INF ZincFinger	FBXL5	98.9899	9.28045	9.67965	9.44994	8.95055	8.91416	9.0045	8.28929	8.67014	8.66422	8.59251	8.65483	8.68015	8.61903	8.58616	8.54939	8.50161	8.49841	8.44704	8.46423	8.47077	8.35743	8.67229	8.55816	8.54495
3	M3 UpD0-D3.0h MYD88_INF ZincFinger	GSAP	98.9899	9.79203	9.61544	10.0816	8.45821	8.32258	8.50061	8.09634	8.19325	8.26928	8.27526	8.27017	8.40549	8.41472	8.11046	8.48376	8.19174	8.13021	8.4048	8.09105	8.13113	8.29096	8.24965	8.09504	8.19347
3	M3 UpD0-D3.0h MYD88_INF ZincFinger	HDHD2	98.9899	11.258	10.9552	10.9918	9.98058	10.4244	10.3808	8.60972	10.1221	10.0952	9.95905	10.1763	10.1889	10.5101	10.3216	10.4147	10.1872	10.0993	10.2763	9.98975	10.2411	9.97738	10.4875	10.3562	10.1234
3	M3 UpD0-D3.0h MYD88_INF ZincFinger	HS.296031	98.9899	11.7843	11.3497	11.4683	11.022	11.1269	10.8932	9.94714	10.7362	10.663	10.8626	10.5809	10.7233	10.8958	10.5412	10.814	10.5974	10.3821	10.4857	10.4344	10.4253	10.3854	10.9566	10.5083	10.2084
[truncated: 7,775 more rows]
