# Supplementary material for: A dichotomy of gene regulatory associations during the activated B-cell to plasmablast transition
Source: Life Sci Alliance. 2020 Aug 25;3(10):e202000654. doi: 10.26508/lsa.202000654 (PMC7471511; doi:10.26508/lsa.202000654)
Supplement: Supplementary file 5 [file LSA-2020-00654_TableS5.xlsx]

## Sheet: TotalCombined
PeakCaller Combined GEM/MACS2 Peaks										Subset overlap with CTCF
Dataset	OverlapSetNum	#	Notes
H929	1	17347
U266	1	12825
OCILY3_1	1	4433								BLIMP1_Only CTCF
OCILY3_2	1	3539								File	OverlapSetNum	#	%BLIMP1_CTCF	11.9615
OCILY10_1	1	9842								BLIMP1	1	2289
OCILY10_2	1	10990								CTCF	1	47018
BLIMP1	1	4323								CTCF_BLIMP1	2	311
CTCF	1	47475			BLIMP1 D6.IRF4
D3.IRF4	1	3961
D3.IRF4	1	7339			File	Num	#	Colour
D3.IRF4	2	18271	Used for Overlap analysis		BLIMP1	1	2600			D6.IRF4_Only CTCF
D6.IRF4	1	9512			IRF4	1	7792			File	OverlapSetNum	#	%BLIMP1_CTCF	40.1951
H3K4me3	1	50422			BLIMP1_IRF4	2	1717			CTCF	1	44211
H3K27Aac	1	28141								IRF4	1	4660
XBP1	1	605								CTCF_IRF4	2	3132
D3.IRF4 D6.IRF4
File	Num	#								BLIMP1_D6.IRF4 CTCF
D3.IRF4	1	15731								File	OverlapSetNum	#	%BLIMP1_CTCF	0.314502
D6.IRF4	1	7027								BLIMP1_IRF4	1	1177
D3.IRF4_D6.IRF4	2	2483								CTCF	1	46793
										CTCF_BLIMP1-IRF4	2	540
BLIMP1 D6.IRF4 XBP1
										Subset overlap with CTCF
File	Num	#
BLIMP1	1	2588
IRF4	1	7609
XBP1	1	381								BLIMP1_Only CTCF
BLIMP1_IRF4	2	1689								File	OverlapSetNum	#	%BLIMP1_CTCF	21.8971
BLIMP1_XBP1	2	13								BLIMP1	1	2322
IRF4_XBP1	2	184								CTCF	1	46681
BLIMP1_IRF4_XBP1	3	27								CTCF_BLIMP1	2	651
					BLIMP1 D3.IRF4
BLIMP1 D3.IRF4 XBP1
					File	Num	#	Colour
File	Num	#			BLIMP1	1	2973			D3.IRF4_Only CTCF
BLIMP1	1	2939			IRF4	1	16869			File	OverlapSetNum	#	%BLIMP1_CTCF	5.60199
IRF4	1	16824			BLIMP1_IRF4	2	1344			CTCF	1	46387
XBP1	1	515								IRF4	1	15924
BLIMP1_IRF4	2	1337								CTCF_IRF4	2	945
BLIMP1_XBP1	2	37
IRF4_XBP1	2	47
BLIMP1_IRF4_XBP1	3	5
										BLIMP1_D3.IRF4 CTCF
BLIMP1 D3.IRF4 D6.IRF4 XBP1										File	OverlapSetNum	#	%BLIMP1_CTCF	0.141369
										BLIMP1_IRF4	1	1154
File	Num	#								CTCF.Union_BLIMP1.IRF4	1	47140
BLIMP1	1	2002								CTCF_BLIMP1-IRF4	2	190
D3.IRF4	1	15144
D6.IRF4	1	5928
XBP1	1	364
BLIMP1_D6.IRF4	2	947
BLIMP1_XBP1	2	10
D3.IRF4_BLIMP1	2	597
D3.IRF4_D6.IRF4	2	1694
D3.IRF4_XBP1	2	19
D6.IRF4_XBP1	2	157
BLIMP1_D6.IRF4_XBP1	3	24
D3.IRF4_BLIMP1_D6.IRF4	3	732
D3.IRF4_BLIMP1_XBP1	3	3
D3.IRF4_D6.IRF4_XBP1	3	25
D3.IRF4_BLIMP1_D6.IRF4_XBP1	4	3
BLIMP1.Std BLIMP1.UNC0638
File	Num	#
BLIMP1.0638	1	676
BLIMP1.Std	1	977
BLIMP1.Std_BLIMP1.0638	2	3660
MM Combined (H929 & U266)
File	Num	#	Notes
IRF4	1	21190
IRF4_IRF4	2	5880	Used for de novo motif analysis
OCILY Combined (OCILY3_1, OCILY3_2, OCILY10_1, OCILY10_2)
File	Num	PeakCount	Notes
IRF4	1	6063
IRF4_IRF4	2	4562	≥2, n=10,303 Used for de novo motif analysis
IRF4_IRF4_IRF4	3	3176
IRF4_IRF4_IRF4_IRF4	4	2565

## Sheet: H929
Set	Peak_Group_ID	Chromosome	Avg_Peak_Centre	SD_Peak_Centre	Peaks_Centre_T_dist	PromoterStatus	Max_LogVal	ForUCSC	Chromosome	Start	End	PeakScores->	absDist	Strand	TSS	Gene	EnsemblCode	absDist	Strand	TSS	Gene	EnsemblCode	absDist	Strand	TSS	Gene	EnsemblCode	absDist	Strand	TSS	Gene	EnsemblCode	absDist	Strand	TSS	Gene	EnsemblCode	absDist	Strand	TSS	Gene	EnsemblCode	absDist	Strand	TSS	Gene	EnsemblCode	absDist	Strand
H929	32851	chrX	71618517	5.48	11	PROMOTER	24.8469	chrX:71618392-71618642	chrX	71618392	71618642	[24.84691, 10.27]	0	-	71618517	CXCR3	ENST00000373693.3	7	-	71618510	CXCR3	ENST00000373691.4
H929	24619	chr12	42326171	0	1	PROMOTER	19.9074	chr12:42326046-42326296	chr12	42326046	42326296	[19.90742, 6.43]	0	+	42326171	PPHLN1	ENST00000552761.5	3	+	42326168	PPHLN1	ENST00000449194.6	3	+	42326174	PPHLN1	ENST00000317560.13	4	+	42326167	PPHLN1	ENST00000256678.12	5	+	42326166	PPHLN1	ENST00000395568.6	7	+	42326178	PPHLN1	ENST00000432191.6	14	+	42326157	PPHLN1	ENST00000358314.11	22	+
H929	1848	chr1	161166470	7	14	PROMOTER	13.6363	chr1:161166345-161166595	chr1	161166345	161166595	[13.63627, 9.06]	0	+	161166470	PPOX	ENST00000544598.5	28	+	161166498	PPOX	ENST00000535223.5	55	+	161166415	PPOX	ENST00000367999.8	60	+	161166410	PPOX	ENST00000352210.9	370	+	161166840	PPOX	ENST00000462866.5
H929	17135	chr7	130051389	0	1	PROMOTER	9.86053	chr7:130051264-130051514	chr7	130051264	130051514	[9.86053, 4.84]	0	-	130051389	ZC3HC1	ENST00000481503.5	15	-	130051374	ZC3HC1	ENST00000360708.9	62	-	130051451	ZC3HC1	ENST00000358303.8:ENST00000311873.9
H929	31101	chr19	55006193	0	0	PROMOTER	7.97	chr19:55006068-55006318	chr19	55006068	55006318	[7.97]	0	+	55006193	CTC-550B14.7	ENST00000593060.5	12	+	55006205	CTC-550B14.7	ENST00000586845.1
H929	16772	chr7	94004375	0	0	PROMOTER	7.33568	chr7:94004250-94004500	chr7	94004250	94004500	[7.33568]	0	-	94004375	BET1	ENST00000222547.7	7	-	94004382	BET1	ENST00000425626.1	14	-	94004361	BET1	ENST00000433727.5
H929	32100	chr21	39867317	0	0	PROMOTER	7.33568	chr21:39867192-39867442	chr21	39867192	39867442	[7.33568]	0	+	39867317	PCP4	ENST00000328619.9
H929	25175	chr12	100200816	1.41	3	PROMOTER	7.2732	chr12:100200691-100200941	chr12	100200691	100200941	[7.2732, 3.62]	0	+	100200816	ACTR6	ENST00000546902.5	14	+	100200830	ACTR6	ENST00000552376.5	35	+	100200851	ACTR6	ENST00000551617.1	729	+	100200087	ACTR6	ENST00000188312.6
H929	29551	chr18	11851396	12	24	PROMOTER	6.75547	chr18:11851271-11851521	chr18	11851271	11851521	[2.65, 6.75547]	0	+	11851396	CHMP1B	ENST00000526991.2	1355	-	11852751	RP11-78A19.3	ENST00000586474.1
H929	9660	chr4	112637456	0	0	PROMOTER	5.48862	chr4:112637331-112637581	chr4	112637331	112637581	[5.48862]	0	+	112637456	LARP7	ENST00000324052.10	330	+	112637126	LARP7	ENST00000509061.5	492	+	112636964	LARP7	ENST00000344442.9	546	-	112636910	ZGRF1	ENST00000505019.5:ENST00000309071.9
H929	13135	chr5	146182623	0	0	PROMOTER	5.10526	chr5:146182498-146182748	chr5	146182498	146182748	[5.10526]	0	-	146182623	LARS	ENST00000510191.5	2	-	146182625	LARS	ENST00000618084.1	37	-	146182660	LARS	ENST00000394434.6	99	-	146182524	LARS	ENST00000274562.13
H929	11807	chr5	78360392	0	1	PROMOTER	66.9818	chr5:78360267-78360517	chr5	78360267	78360517	[66.98179, 33.38]	1	-	78360393	CTD-2037K23.2	ENST00000513755.1	115	-	78360507	CTD-2037K23.2	ENST00000421004.3	191	+	78360583	SCAMP1	ENST00000621999.4	219	+	78360611	SCAMP1	ENST00000618166.4
H929	32955	chrX	119565409	1	2	PROMOTER	28.1914	chrX:119565284-119565534	chrX	119565284	119565534	[28.19136, 5.71]	1	-	119565408	CXorf56	ENST00000536133.2	8	-	119565401	CXorf56	ENST00000644802.1	36	-	119565373	CXorf56	ENST00000320339.8
H929	27034	chr15	50355197	1.41	3	PROMOTER	20.6674	chr15:50355072-50355322	chr15	50355072	50355322	[14.41, 20.66744]	1	-	50355198	GABPB1	ENST00000396464.7	5	-	50355202	GABPB1	ENST00000560825.5	44	-	50355153	GABPB1	ENST00000220429.12:ENST00000429662.6	73	-	50355124	GABPB1	ENST00000543881.5	211	-	50355408	GABPB1	ENST00000380877.7:ENST00000359031.8	270	+	50355467	GABPB1-AS1	ENST00000499624.3	336	-	50354861	CTD-3110H11.3	ENST00000615671.2
H929	25682	chr13	31162387	3	6	PROMOTER	16.7595	chr13:31162262-31162512	chr13	31162262	31162512	[16.75947, 2.83]	1	-	31162388	HSPH1	ENST00000445273.6:ENST00000630972.2	460	-	31161927	HSPH1	ENST00000320027.9:ENST00000380405.7
H929	31105	chr19	55599629	2.45	5	PROMOTER	16.5875	chr19:55599504-55599754	chr19	55599504	55599754	[5.2, 16.58752]	1	-	55599630	FIZ1	ENST00000592585.1	102	-	55599527	FIZ1	ENST00000221665.4	740	+	55600369	ZNF524	ENST00000301073.3
H929	28897	chr17	42773435	13.49	27	PROMOTER	16.494	chr17:42773310-42773560	chr17	42773310	42773560	[16.49398, 7.58]	1	+	42773436	VPS25	ENST00000253794.6
H929	28913	chr17	44014976	0	0	PROMOTER	15.9447	chr17:44014851-44015101	chr17	44014851	44015101	[15.94474]	1	-	44014977	TMEM101	ENST00000206380.7	24	-	44014952	TMEM101	ENST00000587529.1
H929	1187	chr1	143729571	0	0	PROMOTER	15.1887	chr1:143729446-143729696	chr1	143729446	143729696	[15.18866]	1	-	143729570	RNVU1-18	ENST00000384010.1
H929	29151	chr17	64020624	5.48	11	PROMOTER	14.5533	chr17:64020499-64020749	chr17	64020499	64020749	[9.1, 14.55328]	1	-	64020625	ICAM2	ENST00000578379.5:ENST00000578892.5	10	-	64020634	ICAM2	ENST00000412356.5:ENST00000418105.5	17	-	64020607	ICAM2	ENST00000579687.5	22	-	64020602	ICAM2	ENST00000579788.5
H929	10148	chr4	163494668	67.19	144	PROMOTER	12.0276	chr4:163494543-163494793	chr4	163494543	163494793	[5.06, 12.02761, 6.61]	1	+	163494667	TMA16	ENST00000513272.5	20	+	163494688	TMA16	ENST00000513134.5	40	+	163494708	TMA16	ENST00000508268.1	207	+	163494461	TMA16	ENST00000358572.9
H929	15454	chr6	127343397	0	0	PROMOTER	10.6937	chr6:127343272-127343522	chr6	127343272	127343522	[10.69371]	1	-	127343398	ECHDC1	ENST00000430841.6	38	-	127343359	ECHDC1	ENST00000368289.6	51	-	127343346	ECHDC1	ENST00000474289.6	152	-	127343549	ECHDC1	ENST00000528402.5	165	-	127343562	ECHDC1	ENST00000454591.6	202	-	127343599	ECHDC1	ENST00000368291.6	212	-	127343609	ECHDC1	ENST00000454859.7	522	-
H929	641	chr1	53014929	1.41	3	PROMOTER	10.5109	chr1:53014804-53015054	chr1	53014804	53015054	[10.51092, 2.59]	1	+	53014928	SCP2	ENST00000430330.6	9	+	53014938	SCP2	ENST00000408941.7	39	+	53014968	SCP2	ENST00000435345.6	45	+	53014974	SCP2	ENST00000488965.1
H929	21533	chr10	73168070	1.41	3	PROMOTER	10.4512	chr10:73167945-73168195	chr10	73167945	73168195	[3.85, 10.45118]	1	-	73168071	ECD	ENST00000454759.6	6	-	73168064	ECD	ENST00000430082.6	11	-	73168059	ECD	ENST00000372979.8	96	+	73168166	FAM149B1	ENST00000242505.10
H929	32856	chrX	72573102	0	0	PROMOTER	7.97	chrX:72572977-72573227	chrX	72572977	72573227	[7.97]	1	-	72573103	HDAC8	ENST00000373573.7:ENST00000373589.8	54	-	72573048	HDAC8	ENST00000439122.6	249	-	72572853	HDAC8	ENST00000373554.5	259	-	72572843	HDAC8	ENST00000373571.5	265	-	72572837	HDAC8	ENST00000373583.5	278	-	72572824	HDAC8	ENST00000373560.6	289	-	72572813	HDAC8	ENST00000373556.7	290	-
H929	24717	chr12	51048345	0	0	PROMOTER	7.7626	chr12:51048220-51048470	chr12	51048220	51048470	[7.7626]	1	+	51048346	LETMD1	ENST00000552739.5	4	+	51048341	LETMD1	ENST00000547008.5	7	+	51048338	LETMD1	ENST00000418425.6	27	+	51048318	LETMD1	ENST00000550929.5:ENST00000262055.8
H929	1376	chr1	150629580	0	0	PROMOTER	6.95026	chr1:150629455-150629705	chr1	150629455	150629705	[6.95026]	1	-	150629581	ENSA	ENST00000503345.1	3	-	150629577	ENSA	ENST00000271690.12:ENST00000356527.9:ENST00000362052.7	4	-	150629576	ENSA	ENST00000339643.9	14	-	150629566	ENSA	ENST00000369016.8	16	-	150629596	ENSA	ENST00000369014.9	21	-	150629559	ENSA	ENST00000503241.1	110	-	150629470	ENSA	ENST00000638926.1	440	-
H929	18214	chr8	55773377	6.48	13	PROMOTER	6.9194	chr8:55773252-55773502	chr8	55773252	55773502	[6.9194, 4.45]	1	-	55773378	TMEM68	ENST00000522576.5	10	-	55773367	TMEM68	ENST00000521229.5	23	-	55773354	TMEM68	ENST00000434581.6	25	-	55773352	TMEM68	ENST00000519784.5	30	-	55773407	TMEM68	ENST00000334667.6	43	-	55773334	TMEM68	ENST00000523073.5	235	+	55773142	TGS1	ENST00000260129.5
H929	5854	chr2	201183131	0	0	PROMOTER	5.81844	chr2:201183006-201183256	chr2	201183006	201183256	[5.81844]	1	+	201183132	CASP10	ENST00000272879.9	29	+	201183160	CASP10	ENST00000374650.7	38	+	201183169	CASP10	ENST00000346817.9	61	+	201183192	CASP10	ENST00000313728.11	64	+	201183195	CASP10	ENST00000448480.1	233	+	201182898	CASP10	ENST00000360132.7	250	+	201182881	CASP10	ENST00000286186.10
H929	7616	chr3	114291101	0	0	PROMOTER	5.79067	chr3:114290976-114291226	chr3	114290976	114291226	[5.79067]	1	+	114291102	TIGIT	ENST00000486257.5	42	+	114291059	TIGIT	ENST00000481065.5
H929	16079	chr7	22822853	0	0	PROMOTER	5.27474	chr7:22822728-22822978	chr7	22822728	22822978	[5.27474]	1	-	22822852	TOMM7	ENST00000621567.1	2	-	22822851	TOMM7	ENST00000358435.8	62	-	22822791	TOMM7	ENST00000372879.8	509	-	22822344	TOMM7	ENST00000405021.7
H929	24778	chr12	55817920	4.47	9	PROMOTER	5.15355	chr12:55817795-55818045	chr12	55817795	55818045	[5.15355, 4.77]	1	+	55817919	ORMDL2	ENST00000243045.9	121	+	55818041	ORMDL2	ENST00000552672.5	124	+	55818044	ORMDL2	ENST00000550836.1	164	-	55817756	SARNP	ENST00000336133.7	211	-	55817709	SARNP	ENST00000552080.1	410	+	55818330	ORMDL2	ENST00000548974.1
H929	16152	chr7	27662993	0	0	PROMOTER	290.4	chr7:27662868-27663118	chr7	27662868	27663118	[129.36075, 290.4]	2	-	27662995	HIBADH	ENST00000265395.6
H929	22994	chr11	77821160	0	0	PROMOTER	29.0283	chr11:77821035-77821285	chr11	77821035	77821285	[18.67, 29.0283]	2	+	77821162	AAMDC	ENST00000630098.2	5	+	77821155	AAMDC	ENST00000304716.12	6	+	77821154	AAMDC	ENST00000527134.5	16	+	77821144	AAMDC	ENST00000393427.6	27	+	77821187	AAMDC	ENST00000525409.5	31	+	77821129	AAMDC	ENST00000526415.5	51	+	77821109	AAMDC	ENST00000532481.5	143	-
H929	16083	chr7	23014127	3	6	PROMOTER	28.2629	chr7:23014002-23014252	chr7	23014002	23014252	[28.26285, 10.4]	2	-	23014129	FAM126A	ENST00000432176.6	43	-	23014084	FAM126A	ENST00000409923.5	53	-	23014074	FAM126A	ENST00000409763.1
H929	1353	chr1	150269001	2.45	5	PROMOTER	24.1313	chr1:150268876-150269126	chr1	150268876	150269126	[24.13131, 21.17]	2	-	150268999	APH1A	ENST00000369109.7	208	-	150269209	APH1A	ENST00000414276.6	302	-	150269303	APH1A	ENST00000360244.8	801	+	150268200	C1orf54	ENST00000369102.5
H929	24776	chr12	55716040	3.46	7	PROMOTER	14.5019	chr12:55715915-55716165	chr12	55715915	55716165	[4.56, 14.50188]	2	+	55716038	BLOC1S1	ENST00000549147.1	3	+	55716037	BLOC1S1	ENST00000548925.5	4	+	55716036	RP11-644F5.10	ENST00000550412.5	252	+	55716292	BLOC1S1	ENST00000547076.5	473	+	55716513	BLOC1S1	ENST00000551926.1	491	+	55716531	BLOC1S1	ENST00000548556.1	550	+	55716590	RP11-644F5.10	ENST00000549424.1
H929	1388	chr1	150926422	0	0	PROMOTER	14.1184	chr1:150926297-150926547	chr1	150926297	150926547	[14.11841]	2	+	150926424	SETDB1	ENST00000368963.5	10	+	150926412	SETDB1	ENST00000368969.8	73	+	150926349	SETDB1	ENST00000368962.6	83	+	150926339	SETDB1	ENST00000271640.9
H929	11660	chr5	72320237	0	0	PROMOTER	12.6389	chr5:72320112-72320362	chr5	72320112	72320362	[12.63889]	2	-	72320239	MRPS27	ENST00000515404.5	6	-	72320231	MRPS27	ENST00000513900.5	9	-	72320228	MRPS27	ENST00000522095.1	18	-	72320255	MRPS27	ENST00000457646.8	24	-	72320261	MRPS27	ENST00000261413.9	130	+	72320367	PTCD2	ENST00000536805.5:ENST00000543322.5:ENST00000380639.9	139	+	72320376	PTCD2	ENST00000503868.5
H929	30912	chr19	41860253	4.47	9	PROMOTER	12.3049	chr19:41860128-41860378	chr19	41860128	41860378	[12.30493, 4.29]	2	+	41860255	RPS19	ENST00000600467.6	4	+	41860257	RPS19	ENST00000221975.6	193	+	41860446	RPS19	ENST00000593863.5	335	+	41859918	RPS19	ENST00000598742.5
H929	11547	chr5	64768683	6	12	PROMOTER	10.44	chr5:64768558-64768808	chr5	64768558	64768808	[10.44, 9.31056]	2	-	64768685	SREK1IP1	ENST00000513458.8	247	+	64768930	CWC27	ENST00000381070.7	263	+	64768946	CWC27	ENST00000508024.1
H929	9245	chr4	75990958	0	0	PROMOTER	8.10232	chr4:75990833-75991083	chr4	75990833	75991083	[8.10232]	2	-	75990960	SDAD1	ENST00000356260.9	21	-	75990937	SDAD1	ENST00000395711.8
H929	20101	chr9	37120596	0	0	PROMOTER	7.72065	chr9:37120471-37120721	chr9	37120471	37120721	[7.72065]	2	+	37120598	ZCCHC7	ENST00000534928.5	9	+	37120605	ZCCHC7	ENST00000322831.6	57	+	37120539	ZCCHC7	ENST00000336755.9
H929	4914	chr2	110204990	0	0	PROMOTER	7.6212	chr2:110204865-110205115	chr2	110204865	110205115	[7.6212]	2	-	110204992	NPHP1	ENST00000445609.6	5	-	110204995	NPHP1	ENST00000417665.5	9	-	110204999	NPHP1	ENST00000418527.1	18	-	110204972	NPHP1	ENST00000355301.8	52	-	110205042	NPHP1	ENST00000316534.8	76	-	110205066	NPHP1	ENST00000393272.7
H929	32861	chrX	75156288	0	0	PROMOTER	7.28938	chrX:75156163-75156413	chrX	75156163	75156413	[7.28938]	2	-	75156286	ABCB7	ENST00000644766.1	6	-	75156282	ABCB7	ENST00000253577.8	8	-	75156280	ABCB7	ENST00000373394.7	9	-	75156279	ABCB7	ENST00000339447.8	16	-	75156272	ABCB7	ENST00000620875.5	52	-	75156340	ABCB7	ENST00000645829.1
H929	8382	chr3	181700613	1.41	3	PROMOTER	7.14927	chr3:181700488-181700738	chr3	181700488	181700738	[2.21, 7.14927]	2	-	181700611	RP11-4B14.3	ENST00000636224.1	776	+	181699837	SOX2-OT	ENST00000628810.2	994	+	181699619	SOX2-OT	ENST00000626619.2	1005	+	181699608	RF01953	ENST00000410534.2	1007	+	181699606	SOX2-OT	ENST00000642652.1	1014	+	181699599	SOX2-OT	ENST00000630553.1	1390	+	181699223	SOX2-OT	ENST00000466034.6	1803	+
H929	27844	chr16	18801521	0	0	PROMOTER	6.8041	chr16:18801396-18801646	chr16	18801396	18801646	[6.8041]	2	-	18801519	RP11-1035H13.3	ENST00000567078.2	26	-	18801547	ARL6IP1	ENST00000562819.5	97	-	18801424	ARL6IP1	ENST00000546206.6	157	-	18801678	ARL6IP1	ENST00000304414.11	1562	+	18803083	RP11-1035H13.2	ENST00000569096.1
H929	26702	chr14	101810319	0	0	PROMOTER	6.47447	chr14:101810194-101810444	chr14	101810194	101810444	[6.47447]	2	-	101810321	CTD-2017C7.2	ENST00000554859.1	414	+	101809905	PPP2R5C	ENST00000557095.5	424	+	101809895	PPP2R5C	ENST00000445439.7:ENST00000334743.9	450	+	101809869	PPP2R5C	ENST00000557714.1	484	+	101809835	PPP2R5C	ENST00000556946.1	516	+	101809803	PPP2R5C	ENST00000350249.7
H929	20114	chr9	37753805	0	0	PROMOTER	5.67647	chr9:37753680-37753930	chr9	37753680	37753930	[5.67647]	2	+	37753803	TRMT10B	ENST00000377753.6:ENST00000537911.5	12	+	37753817	TRMT10B	ENST00000377754.6:ENST00000297994.3
H929	22704	chr11	47579017	0	0	PROMOTER	5.56966	chr11:47578892-47579142	chr11	47578892	47579142	[5.56966]	2	-	47579015	KBTBD4	ENST00000430070.6	7	+	47579010	NDUFS3	ENST00000263774.8	12	+	47579029	NDUFS3	ENST00000529276.1	23	+	47579040	NDUFS3	ENST00000528192.5	48	-	47578969	KBTBD4	ENST00000395288.6	55	+	47579072	NDUFS3	ENST00000534208.5	57	+	47579074	NDUFS3	ENST00000534716.2	61	-
H929	4117	chr2	32165839	3.46	7	PROMOTER	5.28	chr2:32165714-32165964	chr2	32165714	32165964	[5.28, 5.06753]	2	+	32165841	SLC30A6	ENST00000357055.7:ENST00000435660.5	25	+	32165864	SLC30A6	ENST00000379343.6:ENST00000282587.9	30	+	32165869	SLC30A6	ENST00000406369.2	82	-	32165757	RP11-563N4.1	ENST00000608489.1
H929	14548	chr6	37433223	4	8	PROMOTER	21.2434	chr6:37433098-37433348	chr6	37433098	37433348	[21.24336, 8.63]	3	+	37433220	CMTR1	ENST00000373451.8
H929	5845	chr2	200889272	4.47	9	PROMOTER	18.8531	chr2:200889147-200889397	chr2	200889147	200889397	[18.85307, 7.7]	3	-	200889269	PPIL3	ENST00000286175.12	31	-	200889303	PPIL3	ENST00000409449.5	113	+	200889385	NIF3L1	ENST00000409020.5	116	+	200889388	NIF3L1	ENST00000359683.8	118	-	200889154	PPIL3	ENST00000392283.8	136	-	200889136	PPIL3	ENST00000409361.5	143	+	200889415	NIF3L1	ENST00000409357.5
H929	14987	chr6	87590124	0	0	PROMOTER	18.0082	chr6:87589999-87590249	chr6	87589999	87590249	[18.00823]	3	+	87590121	ORC3	ENST00000392844.7	11	+	87590135	ORC3	ENST00000257789.4	57	+	87590067	ORC3	ENST00000546266.5	121	-	87590003	RARS2	ENST00000369536.9
H929	7672	chr3	121660908	4	8	PROMOTER	16.494	chr3:121660783-121661033	chr3	121660783	121661033	[6.78, 16.49398]	3	-	121660911	HCLS1	ENST00000314583.7	10	-	121660898	HCLS1	ENST00000428394.6
H929	24385	chr12	4649110	4.47	9	PROMOTER	14.8781	chr12:4648985-4649235	chr12	4648985	4649235	[14.87812, 11.98]	3	+	4649107	NDUFA9	ENST00000266544.9	63	-	4649047	AKAP3	ENST00000545990.6:ENST00000228850.5
H929	12874	chr5	132410923	8	16	PROMOTER	14.3214	chr5:132410798-132411048	chr5	132410798	132411048	[6.46, 14.32137]	3	+	132410920	AC116366.4	ENST00000612967.2	12	+	132410911	AC116366.7	ENST00000638568.2	58	+	132410981	AC116366.4	ENST00000337752.6	66	+	132410989	AC116366.4	ENST00000407797.6	91	+	132410832	AC116366.7	ENST00000638452.2
H929	7334	chr3	88149882	8.49	17	PROMOTER	13.698	chr3:88149757-88150007	chr3	88149757	88150007	[13.698, 7.2]	3	-	88149885	CGGBP1	ENST00000462901.5	105	+	88149987	C3orf38	ENST00000486971.1	139	+	88149743	C3orf38	ENST00000318887.7
H929	4058	chr2	27628875	0	0	PROMOTER	13.5002	chr2:27628750-27629000	chr2	27628750	27629000	[13.50019]	3	-	27628878	CCDC121	ENST00000394775.3	121	+	27628996	GPN1	ENST00000616939.4:ENST00000264718.7	137	-	27629012	CCDC121	ENST00000324364.3	177	+	27629052	GPN1	ENST00000610189.1	217	+	27628658	GPN1	ENST00000407583.7	227	+	27628648	GPN1	ENST00000503738.5:ENST00000424214.5:ENST00000458167.6	628	+	27628247	GPN1	ENST00000515877.5
H929	30662	chr19	12881471	0	0	PROMOTER	12.8116	chr19:12881346-12881596	chr19	12881346	12881596	[12.81158]	3	-	12881468	DNASE2	ENST00000222219.7	502	+	12880969	CTD-2265O21.7	ENST00000592400.1
H929	27982	chr16	31074419	0	0	PROMOTER	11.1578	chr16:31074294-31074544	chr16	31074294	31074544	[11.15776]	3	+	31074422	ZNF646	ENST00000300850.5	99	-	31074320	ZNF668	ENST00000300849.4	917	-	31073502	ZNF668	ENST00000538906.5:ENST00000394983.6	1483	+	31075902	ZNF646	ENST00000394979.2
H929	886	chr1	85062318	0	0	PROMOTER	10.994	chr1:85062193-85062443	chr1	85062193	85062443	[10.99404]	3	+	85062321	WDR63	ENST00000294664.10	6	+	85062312	WDR63	ENST00000326813.12
H929	29007	chr17	50707921	0	0	PROMOTER	10.3215	chr17:50707796-50708046	chr17	50707796	50708046	[10.32149]	3	-	50707924	ANKRD40	ENST00000285243.6
H929	7686	chr3	122416048	0	0	PROMOTER	9.42806	chr3:122415923-122416173	chr3	122415923	122416173	[9.42806]	3	-	122416051	WDR5B	ENST00000330689.5	159	+	122416207	RP11-299J3.8	ENST00000608756.5:ENST00000609469.5	171	+	122416219	RP11-299J3.8	ENST00000608346.1	177	+	122416225	RP11-299J3.8	ENST00000608015.1
H929	6923	chr3	45995812	0	0	PROMOTER	9.30081	chr3:45995687-45995937	chr3	45995687	45995937	[9.30081]	3	-	45995815	FYCO1	ENST00000296137.6	12	-	45995824	FYCO1	ENST00000535325.5
H929	1073	chr1	114780682	0	0	PROMOTER	9.24894	chr1:114780557-114780807	chr1	114780557	114780807	[9.24894]	3	-	114780685	SIKE1	ENST00000369528.9	5	-	114780677	SIKE1	ENST00000060969.5
H929	8563	chr3	197950187	2	4	PROMOTER	9.10003	chr3:197950062-197950312	chr3	197950062	197950312	[9.10003, 3.36]	3	+	197950190	RPL35A	ENST00000448864.6:ENST00000647248.1	207	+	197949980	RPL35A	ENST00000464167.6	262	-	197949925	IQCG	ENST00000455191.5	302	-	197949885	IQCG	ENST00000453254.5
H929	10386	chr4	185204234	0	0	PROMOTER	7.98565	chr4:185204109-185204359	chr4	185204109	185204359	[7.98565]	3	+	185204237	SNX25	ENST00000618785.4:ENST00000504273.5	206	-	185204028	CFAP97	ENST00000514798.1	233	-	185204001	CFAP97	ENST00000458385.6	269	-	185203965	CFAP97	ENST00000296775.7
H929	11297	chr5	50428730	0	0	PROMOTER	7.97	chr5:50428605-50428855	chr5	50428605	50428855	[7.97]	3	-	50428727	EMB	ENST00000514111.1
H929	4500	chr2	65436708	4.47	9	PROMOTER	6.75547	chr2:65436583-65436833	chr2	65436583	65436833	[3.93, 6.75547]	3	+	65436711	AC074391.1	ENST00000606978.5	22	+	65436730	AC074391.1	ENST00000377977.3
H929	25443	chr12	120201288	0	0	PROMOTER	6.25562	chr12:120201163-120201413	chr12	120201163	120201413	[6.25562]	3	+	120201291	RP1-278C19.3	ENST00000542265.5	39	+	120201327	RP1-278C19.3	ENST00000542314.5	68	+	120201356	RP1-278C19.3	ENST00000538804.5	77	-	120201211	RPLP0	ENST00000392514.8:ENST00000228306.8	83	+	120201371	RP1-278C19.3	ENST00000535200.1	178	-	120201110	RPLP0	ENST00000546989.5	181	-	120201107	RPLP0	ENST00000313104.9	189	-
H929	4955	chr2	112542462	0	0	PROMOTER	5.51551	chr2:112542337-112542587	chr2	112542337	112542587	[5.51551]	3	+	112542465	POLR1B	ENST00000417433.6	236	+	112542226	POLR1B	ENST00000409894.7	426	+	112542036	POLR1B	ENST00000541869.5	547	+	112541915	POLR1B	ENST00000263331.9:ENST00000537335.5
H929	25122	chr12	95073700	0	0	PROMOTER	5.34262	chr12:95073575-95073825	chr12	95073575	95073825	[5.34262]	3	-	95073703	NR2C1	ENST00000333003.9	72	-	95073628	NR2C1	ENST00000622476.4	120	-	95073580	NR2C1	ENST00000393101.7	163	-	95073537	NR2C1	ENST00000330677.7
H929	15450	chr6	126340177	47.12	107	PROMOTER	5.34262	chr6:126340052-126340302	chr6	126340052	126340302	[2.45, 5.34262, 2.47]	3	+	126340174	CENPW	ENST00000368325.5:ENST00000368326.5:ENST00000368328.4
H929	20877	chr9	132944630	4	8	PROMOTER	5.06753	chr9:132944505-132944755	chr9	132944505	132944755	[4.44, 5.06753]	3	-	132944627	TSC1	ENST00000642646.1	3	-	132944633	TSC1	ENST00000298552.8:ENST00000646625.1:ENST00000645150.1:ENST00000403810.6	7	-	132944623	TSC1	ENST00000642617.1	11	-	132944619	TSC1	ENST00000642627.1	13	-	132944617	TSC1	ENST00000643875.1	14	-	132944616	TSC1	ENST00000643072.1:ENST00000642745.1:ENST00000647462.1	15	-	132944615	TSC1	ENST00000643583.1	139	-
H929	1028	chr1	112396185	3.46	7	PROMOTER	62.0216	chr1:112396060-112396310	chr1	112396060	112396310	[24.5, 62.02156]	4	+	112396181	CTTNBP2NL	ENST00000271277.10
H929	4926	chr2	111120918	3	6	PROMOTER	40.48	chr2:111120793-111121043	chr2	111120793	111121043	[40.47997, 18.53]	4	+	111120914	BCL2L11	ENST00000308659.12:ENST00000610735.4:ENST00000615946.4:ENST00000619294.4:ENST00000620862.4:ENST00000621302.4:ENST00000622509.4:ENST00000622612.4:ENST00000337565.9:ENST00000357757.6	11	+	111120929	BCL2L11	ENST00000393256.7
H929	7976	chr3	146544624	0	1	PROMOTER	35.481	chr3:146544499-146544749	chr3	146544499	146544749	[35.48102, 13.88]	4	-	146544620	PLSCR1	ENST00000448787.6	113	-	146544737	PLSCR1	ENST00000487389.5	240	-	146544864	PLSCR1	ENST00000342435.8
H929	24314	chr12	389344	0	0	PROMOTER	26.3668	chr12:389219-389469	chr12	389219	389469	[10.14, 26.3668]	4	+	389348	CCDC77	ENST00000540180.5	6	+	389350	CCDC77	ENST00000422000.5	110	-	389454	KDM5A	ENST00000399788.6
H929	26959	chr15	43133528	2	4	PROMOTER	21.9322	chr15:43133403-43133653	chr15	43133403	43133653	[7.58, 21.93225]	4	+	43133524	TMEM62	ENST00000260403.6
H929	14153	chr6	20534461	2	4	PROMOTER	18.8658	chr6:20534336-20534586	chr6	20534336	20534586	[5.99, 18.86577]	4	+	20534457	CDKAL1	ENST00000274695.8	20	+	20534481	CDKAL1	ENST00000613575.4
H929	17507	chr8	9260291	1	2	PROMOTER	18.8658	chr8:9260166-9260416	chr8	9260166	9260416	[11.92, 18.86577]	4	-	9260295	RP11-10A14.7	ENST00000518589.1
H929	9518	chr4	99564036	7	14	PROMOTER	18.0591	chr4:99563911-99564161	chr4	99563911	99564161	[6.66, 18.05911]	4	-	99564032	TRMT10A	ENST00000394876.6	19	-	99564017	TRMT10A	ENST00000394877.7	47	+	99564083	MTTP	ENST00000511045.5:ENST00000457717.5	368	-	99563668	TRMT10A	ENST00000273962.7
H929	16064	chr7	22563341	10.49	21	PROMOTER	16.5875	chr7:22563216-22563466	chr7	22563216	22563466	[16.58752, 11.52]	4	+	22563337	AC002480.3	ENST00000435127.1
H929	14800	chr6	57317620	1.41	3	PROMOTER	16.494	chr6:57317495-57317745	chr6	57317495	57317745	[16.49398, 8.19]	4	+	57317624	PRIM2	ENST00000615550.4:ENST00000274891.10
H929	178	chr1	16514289	0	0	PROMOTER	13.4705	chr1:16514164-16514414	chr1	16514164	16514414	[13.47053]	4	-	16514285	RNU1-1	ENST00000383925.1	356	+	16514645	RP4-798A10.7	ENST00000562878.1
H929	27980	chr16	30949062	8	16	PROMOTER	12.1661	chr16:30948937-30949187	chr16	30948937	30949187	[3.05, 12.16605]	4	+	30949066	ORAI3	ENST00000318663.4	61	+	30949123	ORAI3	ENST00000566237.1	90	+	30949152	ORAI3	ENST00000562699.1	676	+	30948386	AC135048.13	ENST00000566056.1
H929	27974	chr16	30472662	6.48	13	PROMOTER	11.5851	chr16:30472537-30472787	chr16	30472537	30472787	[6.13, 11.58514]	4	+	30472658	ITGAL	ENST00000356798.10	67	+	30472729	ITGAL	ENST00000358164.9	89	+	30472751	ITGAL	ENST00000433423.2	1075	+	30471587	RF00019	ENST00000410769.1
H929	6491	chr3	8963466	0	0	PROMOTER	10.8683	chr3:8963341-8963591	chr3	8963341	8963591	[10.86832]	4	-	8963470	RAD18	ENST00000418463.5:ENST00000421052.5	36	-	8963502	RAD18	ENST00000264926.6
H929	8172	chr3	160755146	1	2	PROMOTER	10.8683	chr3:160755021-160755271	chr3	160755021	160755271	[10.86832, 2.61]	4	-	160755142	RP11-16N11.2	ENST00000566372.1	456	+	160755602	PPM1L	ENST00000497343.5	1062	+	160756208	PPM1L	ENST00000498165.5
H929	25452	chr12	120529178	3	6	PROMOTER	10.7161	chr12:120529053-120529303	chr12	120529053	120529303	[3.63, 10.71606]	4	-	120529182	COQ5	ENST00000288532.10	17	-	120529161	COQ5	ENST00000445328.6
H929	31273	chr20	33401565	0	0	PROMOTER	10.645	chr20:33401440-33401690	chr20	33401440	33401690	[10.64496]	4	-	33401561	CDK5RAP1	ENST00000339269.5:ENST00000346416.6:ENST00000357886.8	48	-	33401517	CDK5RAP1	ENST00000473997.5
H929	22362	chr11	9460991	5.48	11	PROMOTER	10.509	chr11:9460866-9461116	chr11	9460866	9461116	[5.61, 10.50895]	4	+	9460987	ZNF143	ENST00000396597.7	15	+	9460976	ZNF143	ENST00000530463.5	26	+	9460965	ZNF143	ENST00000396602.6	32	+	9461023	ZNF143	ENST00000299606.6	289	-	9460702	CTD-2371O3.3	ENST00000596206.2	469	+	9460522	ZNF143	ENST00000396604.5
H929	27654	chr16	3235163	0	0	PROMOTER	10.3657	chr16:3235038-3235288	chr16	3235038	3235288	[10.36567]	4	-	3235167	ZNF200	ENST00000431561.7	23	-	3235186	ZNF200	ENST00000396870.8	93	-	3235070	ZNF200	ENST00000575948.1	197	-	3235360	ZNF200	ENST00000396868.7	293	-	3235456	ZNF200	ENST00000414144.6	294	-	3235457	ZNF200	ENST00000396871.8
H929	1590	chr1	156338792	5.48	11	PROMOTER	9.91	chr1:156338667-156338917	chr1	156338667	156338917	[9.91, 9.17554]	4	+	156338788	TSACC	ENST00000466306.5	98	+	156338694	TSACC	ENST00000368252.5	110	+	156338902	TSACC	ENST00000368251.1	164	+	156338628	TSACC	ENST00000481479.5	269	+	156338523	TSACC	ENST00000368254.5	285	+	156338507	TSACC	ENST00000470342.5	289	+	156338503	TSACC	ENST00000368253.6	327	-
H929	6247	chr2	230416152	13.49	27	PROMOTER	9.82817	chr2:230416027-230416277	chr2	230416027	230416277	[4.07, 9.82817]	4	+	230416156	SP100	ENST00000427101.6	88	+	230416240	SP100	ENST00000409824.5	95	+	230416247	SP100	ENST00000409341.5	114	+	230416266	SP100	ENST00000409112.5:ENST00000340126.8	210	+	230415942	SP100	ENST00000264052.9	604	+	230416756	SP100	ENST00000409897.5
H929	2438	chr1	173867811	0	1	PROMOTER	8.39	chr1:173867686-173867936	chr1	173867686	173867936	[8.39, 5.32732]	4	-	173867815	GAS5	ENST00000454068.5	82	-	173867729	GAS5	ENST00000451607.5	122	-	173867689	GAS5	ENST00000432536.5	172	-	173867983	GAS5	ENST00000452197.5	176	-	173867987	GAS5	ENST00000450589.5	178	-	173867989	GAS5	ENST00000449289.5	271	+	173868082	ZBTB37	ENST00000367704.5	544	+
H929	14470	chr6	32838784	0	0	PROMOTER	8.28656	chr6:32838659-32838909	chr6	32838659	32838909	[8.28656]	4	-	32838780	TAP2	ENST00000374897.2	14	-	32838770	TAP2	ENST00000620123.4	38	-	32838822	XXbac-BPG246D15.9	ENST00000452392.2	57	-	32838727	TAP2	ENST00000374899.8
H929	30813	chr19	34734152	0	0	PROMOTER	7.49674	chr19:34734027-34734277	chr19	34734027	34734277	[7.49674]	4	+	34734156	ZNF181	ENST00000392232.7	315	-	34733837	CTD-2553L13.10	ENST00000612269.1	423	+	34734575	ZNF181	ENST00000459757.6	797	+	34734949	ZNF181	ENST00000492450.2
H929	26976	chr15	44711481	85.55	186	PROMOTER	6.31426	chr15:44711356-44711606	chr15	44711356	44711606	[6.31426, 2.88, 5.17678, 3.35]	4	+	44711477	B2M	ENST00000558401.5	6	+	44711487	B2M	ENST00000544417.5	32	+	44711513	B2M	ENST00000559916.1
H929	1411	chr1	151763560	0	0	PROMOTER	5.92676	chr1:151763435-151763685	chr1	151763435	151763685	[5.92676]	4	-	151763564	MRPL9	ENST00000368830.7	18	+	151763578	OAZ3	ENST00000479764.6	76	-	151763484	MRPL9	ENST00000368829.3	80	+	151763480	OAZ3	ENST00000453029.2	591	+	151762969	OAZ3	ENST00000627780.2:ENST00000321531.10	661	+	151762899	OAZ3	ENST00000635322.1
H929	8935	chr4	38509771	0	0	PROMOTER	5.71035	chr4:38509646-38509896	chr4	38509646	38509896	[5.71035]	4	+	38509767	RP11-213G21.1	ENST00000507056.1
H929	22154	chr10	120851213	0	0	PROMOTER	5.09222	chr10:120851088-120851338	chr10	120851088	120851338	[5.09222]	4	-	120851209	RP11-323P17.1	ENST00000598981.5	38	+	120851175	WDR11	ENST00000263461.10	132	-	120851345	RP11-323P17.1	ENST00000630905.2
H929	5763	chr2	195657123	79.44	189	PROMOTER	999	chr2:195656998-195657248	chr2	195656998	195657248	[43.77, 33.47, 101.61655, 999.0]	5	+	195657128	SLC39A10	ENST00000359634.9	376	+	195656747	SLC39A10	ENST00000409086.7
H929	1393	chr1	151166047	58.22	124	PROMOTER	44.6298	chr1:151165922-151166172	chr1	151165922	151166172	[4.39, 29.91, 44.6298]	5	+	151166042	SCNM1	ENST00000368905.8	32	+	151166079	SCNM1	ENST00000368902.1	99	-	151165948	LYSMD1	ENST00000440902.2	128	-	151165919	LYSMD1	ENST00000368908.9
H929	30773	chr19	22422508	4	8	PROMOTER	29.4191	chr19:22422383-22422633	chr19	22422383	22422633	[7.25, 29.41907]	5	+	22422513	AC011516.1	ENST00000599129.1	154	-	22422354	ZNF98	ENST00000601553.1	162	-	22422346	ZNF98	ENST00000357774.9
H929	32533	chrM	1666	0	0	PROMOTER	25.6582	chrM:1541-1791	chrM	1541	1791	[25.65825]	5	+	1671	MT-RNR2	ENST00000387347.2	64	+	1602	MT-TV	ENST00000387342.1	1018	+	648	MT-RNR1	ENST00000389680.2	1089	+	577	MT-TF	ENST00000387314.1	1564	+	3230	MT-TL1	ENST00000386347.1	1641	+	3307	MT-ND1	ENST00000361390.2
H929	3706	chr1_KI270713v1_random	22029	0	0	PROMOTER	19.3525	chr1_KI270713v1_random:21904-22154	chr1_KI270713v1_random	21904	22154	[19.35251]	5	-	22024	RF00003	ENST00000619109.1
H929	1295	chr1	148038921	2.45	5	PROMOTER	17.88	chr1:148038796-148039046	chr1	148038796	148039046	[17.88, 12.76663]	5	-	148038916	RNVU1-7	ENST00000383858.1
H929	20069	chr9	35103152	0	0	PROMOTER	17.6334	chr9:35103027-35103277	chr9	35103027	35103277	[17.63341]	5	-	35103157	STOML2	ENST00000356493.9	43	-	35103195	STOML2	ENST00000452248.6:ENST00000619795.4
H929	29507	chr18	9506237	5	10	PROMOTER	16.0893	chr18:9506112-9506362	chr18	9506112	9506362	[16.08932, 7.81]	5	+	9506242	RP11-61L19.1	ENST00000580891.1
H929	27630	chr16	690439	6	12	PROMOTER	13.2967	chr16:690314-690564	chr16	690314	690564	[13.29674, 4.94]	5	-	690444	WDR24	ENST00000248142.7	39	-	690400	WDR24	ENST00000293883.8	945	+	689494	LA16c-313D11.12	ENST00000566927.1
H929	3989	chr2	20823135	0	0	PROMOTER	12.5005	chr2:20823010-20823260	chr2	20823010	20823260	[12.50054]	5	-	20823130	LDAH	ENST00000435420.6:ENST00000440866.6:ENST00000541941.5:ENST00000619656.4	21	-	20823114	LDAH	ENST00000381090.7:ENST00000237822.7	25	-	20823110	LDAH	ENST00000419825.2	31	-	20823104	LDAH	ENST00000403006.6	34	-	20823101	LDAH	ENST00000626491.2
H929	22669	chr11	43880731	0	0	PROMOTER	12.2397	chr11:43880606-43880856	chr11	43880606	43880856	[4.03, 12.23972]	5	-	43880726	RP11-613D13.5	ENST00000530450.1	108	+	43880839	ALKBH3	ENST00000302708.8
H929	17725	chr8	28490232	0	0	PROMOTER	11.7169	chr8:28490107-28490357	chr8	28490107	28490357	[11.71689]	5	-	28490237	FBXO16	ENST00000518734.5	46	-	28490278	FBXO16	ENST00000346498.6	86	-	28490318	FBXO16	ENST00000380254.6
H929	5865	chr2	201260505	7	14	PROMOTER	9.22244	chr2:201260380-201260630	chr2	201260380	201260630	[9.22244, 3.86]	5	+	201260500	CASP8	ENST00000323492.11
H929	22940	chr11	72080682	0	0	PROMOTER	7.88593	chr11:72080557-72080807	chr11	72080557	72080807	[7.88593]	5	-	72080687	NUMA1	ENST00000393695.7	11	-	72080693	NUMA1	ENST00000613205.4	16	+	72080666	LRTOMT	ENST00000642510.1	77	+	72080605	LRTOMT	ENST00000539271.6	87	+	72080595	LRTOMT	ENST00000647530.1	130	+	72080812	LRTOMT	ENST00000423494.6	144	+	72080826	LRTOMT	ENST00000539587.6	154	+
H929	8434	chr3	186806496	0	0	PROMOTER	7.41192	chr3:186806371-186806621	chr3	186806371	186806621	[7.41192]	5	-	186806501	RFC4	ENST00000296273.6	199	-	186806695	RFC4	ENST00000392481.6	1196	+	186807692	RP11-573D15.3	ENST00000434957.1	1772	-	186804724	RFC4	ENST00000433496.5
H929	13016	chr5	141078029	7.48	15	PROMOTER	7.37341	chr5:141077904-141078154	chr5	141077904	141078154	[7.37341, 2.09]	5	-	141078024	CTC-270D5.1	ENST00000624778.1	47	+	141078076	CH17-140K24.1	ENST00000624102.1
H929	11068	chr5	34008023	0	0	PROMOTER	6.24045	chr5:34007898-34008148	chr5	34007898	34008148	[6.24045]	5	-	34008028	AMACR	ENST00000382085.7:ENST00000512079.5:ENST00000382068.3	8	-	34008031	AMACR	ENST00000382072.6	61	-	34008084	AMACR	ENST00000426255.6	81	-	34008104	AMACR	ENST00000502637.5	85	-	34008108	AMACR	ENST00000335606.10
H929	29316	chr17	75456459	0	0	PROMOTER	5.66264	chr17:75456334-75456584	chr17	75456334	75456584	[5.66264]	5	+	75456464	TMEM94	ENST00000314256.11	191	+	75456650	TMEM94	ENST00000579208.5
H929	15286	chr6	112087594	0	0	PROMOTER	5.06753	chr6:112087469-112087719	chr6	112087469	112087719	[5.06753]	5	+	112087599	FAM229B	ENST00000368656.6	44	+	112087638	FAM229B	ENST00000604268.1	81	-	112087513	TUBE1	ENST00000368662.9
H929	20190	chr9	71911551	2.45	5	PROMOTER	36.0133	chr9:71911426-71911676	chr9	71911426	71911676	[36.0133, 24.17]	6	+	71911545	C9orf85	ENST00000334731.6:ENST00000377031.7	110	+	71911661	C9orf85	ENST00000486911.2	620	-	71910931	ABHD17B	ENST00000377041.6	809	-	71910742	ABHD17B	ENST00000333421.6
H929	11214	chr5	40835341	3.46	7	PROMOTER	31.8	chr5:40835216-40835466	chr5	40835216	40835466	[28.54818, 31.8]	6	-	40835335	RPL37	ENST00000274242.9	129	-	40835212	RPL37	ENST00000509877.5:ENST00000508493.1
H929	8753	chr4	18021882	4.47	9	PROMOTER	23.8807	chr4:18021757-18022007	chr4	18021757	18022007	[23.88072, 5.75]	6	-	18021876	LCORL	ENST00000326877.8:ENST00000635767.1	22	-	18021860	LCORL	ENST00000382226.5	1148	-	18020734	LCORL	ENST00000382224.5
H929	27327	chr15	75368636	9	18	PROMOTER	19.9146	chr15:75368511-75368761	chr15	75368511	75368761	[19.91461, 9.78]	6	-	75368630	MAN2C1	ENST00000267978.9	32	-	75368604	MAN2C1	ENST00000563622.5	41	-	75368595	MAN2C1	ENST00000565683.5	44	-	75368592	MAN2C1	ENST00000569482.5	481	+	75368155	RP11-817O13.8	ENST00000563278.1
H929	32151	chr21	46184465	5.48	11	PROMOTER	18.4016	chr21:46184340-46184590	chr21	46184340	46184590	[18.40157, 6.3]	6	-	46184459	SPATC1L	ENST00000291672.5	11	-	46184476	SPATC1L	ENST00000330205.10	614	+	46185079	AP001468.58	ENST00000415026.1
H929	29849	chr18	49492438	0	1	PROMOTER	14.9975	chr18:49492313-49492563	chr18	49492313	49492563	[4.97, 14.99747]	6	-	49492444	RPL17	ENST00000579248.5	41	-	49492479	RPL17	ENST00000581373.5	41	-	49492479	RPL17-C18orf32	ENST00000332968.11	44	-	49492482	RPL17	ENST00000618619.4	85	-	49492523	RPL17	ENST00000580261.5	598	-	49491840	RPL17	ENST00000579408.5	624	-	49491814	RPL17	ENST00000580210.5	709	-
H929	13226	chr5	150449750	0	0	PROMOTER	13.8912	chr5:150449625-150449875	chr5	150449625	150449875	[13.89116]	6	-	150449756	RPS14	ENST00000407193.6	54	-	150449696	RPS14	ENST00000401695.8	59	-	150449691	RPS14	ENST00000312037.6	837	-	150448913	RPS14	ENST00000521466.5
H929	4417	chr2	55519598	1.41	3	PROMOTER	12.3843	chr2:55519473-55519723	chr2	55519473	55519723	[7.0, 12.38435]	6	+	55519604	CFAP36	ENST00000339012.7	48	+	55519646	CFAP36	ENST00000406691.7	56	+	55519654	CFAP36	ENST00000349456.8	92	+	55519690	CFAP36	ENST00000407816.7	133	+	55519731	CFAP36	ENST00000403007.4
H929	30661	chr19	12723990	0	0	PROMOTER	9.96564	chr19:12723865-12724115	chr19	12723865	12724115	[6.56, 9.96564]	6	-	12723996	TNPO2	ENST00000425528.5	21	-	12724011	TNPO2	ENST00000588216.5	1418	-	12722572	TNPO2	ENST00000592287.5	1635	-	12722355	TNPO2	ENST00000356861.9	1896	-	12725886	CTD-2659N19.4	ENST00000591596.1
H929	1881	chr1	161766288	2	4	PROMOTER	9.80954	chr1:161766163-161766413	chr1	161766163	161766413	[8.62, 9.80954]	6	+	161766294	ATF6	ENST00000367942.3	61	-	161766227	RP11-474I16.8	ENST00000431097.2
H929	4057	chr2	27356498	4	8	PROMOTER	8.57326	chr2:27356373-27356623	chr2	27356373	27356623	[7.37, 8.57326]	6	-	27356492	GTF3C2	ENST00000359541.6	252	+	27356246	AC074117.10	ENST00000447070.1	536	-	27357034	GTF3C2	ENST00000264720.7	690	+	27357188	AC074117.10	ENST00000412749.1
H929	3509	chr1	234373707	1	2	PROMOTER	8.07835	chr1:234373582-234373832	chr1	234373582	234373832	[7.37, 8.07835]	6	+	234373701	COA6	ENST00000366612.1	24	+	234373683	COA6	ENST00000366613.1	114	-	234373593	RP5-827C21.4	ENST00000451795.1	239	+	234373468	COA6	ENST00000619305.1	251	+	234373456	COA6	ENST00000366615.8	1521	+	234372186	RP5-827C21.6	ENST00000610233.1
H929	24939	chr12	71663852	0	0	PROMOTER	5.06863	chr12:71663727-71663977	chr12	71663727	71663977	[5.06863]	6	-	71663858	ZFC3H1	ENST00000552037.1	28	-	71663824	ZFC3H1	ENST00000548100.1	117	-	71663969	ZFC3H1	ENST00000378743.7	629	+	71664481	THAP2	ENST00000547843.1	843	+	71663009	THAP2	ENST00000308086.2
H929	8217	chr3	167734924	0	0	PROMOTER	5.02246	chr3:167734799-167735049	chr3	167734799	167735049	[5.02246]	6	-	167734930	PDCD10	ENST00000497056.6	15	-	167734939	PDCD10	ENST00000473645.6	32	-	167734892	PDCD10	ENST00000470131.5	73	-	167734851	PDCD10	ENST00000471885.5	98	-	167734826	PDCD10	ENST00000392750.6	380	-	167734544	PDCD10	ENST00000461494.5	442	-	167734482	PDCD10	ENST00000487947.6	506	+
H929	19946	chr9	21160343	4	8	PROMOTER	19.577	chr9:21160218-21160468	chr9	21160218	21160468	[19.57695, 5.52]	7	-	21160336	RF00019	ENST00000362765.1
H929	20582	chr9	108934123	0	0	PROMOTER	15.1077	chr9:108933998-108934248	chr9	108933998	108934248	[15.10766]	7	-	108934116	ELP1	ENST00000374647.9	58	+	108934181	FAM206A	ENST00000322940.10	170	-	108933953	ELP1	ENST00000537196.1	364	+	108934487	FAM206A	ENST00000374624.7
H929	25966	chr14	24188957	0	0	PROMOTER	9.32881	chr14:24188832-24189082	chr14	24188832	24189082	[9.32881]	7	-	24188964	IPO4	ENST00000354464.10	170	-	24188787	IPO4	ENST00000625289.1	1459	-	24190416	RP11-468E2.2	ENST00000561419.1
H929	1370	chr1	150579597	9.49	19	PROMOTER	8.92	chr1:150579472-150579722	chr1	150579472	150579722	[8.92, 6.44533]	7	-	150579590	MCL1	ENST00000369026.2	67	-	150579530	MCL1	ENST00000307940.3	141	-	150579738	MCL1	ENST00000620947.4
H929	24540	chr12	27524175	0	1	PROMOTER	7.49674	chr12:27524050-27524300	chr12	27524050	27524300	[7.49674, 4.41]	7	+	27524182	PPFIBP1	ENST00000537927.5	17	+	27524158	PPFIBP1	ENST00000545334.5	31	+	27524206	PPFIBP1	ENST00000318304.12	45	+	27524220	PPFIBP1	ENST00000535047.5	49	+	27524224	PPFIBP1	ENST00000542629.5	81	+	27524256	PPFIBP1	ENST00000228425.10
H929	14510	chr6	34888078	0	0	PROMOTER	7.2732	chr6:34887953-34888203	chr6	34887953	34888203	[7.2732]	7	-	34888071	TAF11	ENST00000420584.3	11	-	34888089	TAF11	ENST00000361288.8	1187	+	34889265	ANKS1A	ENST00000360359.4
H929	7187	chr3	69084937	0	0	PROMOTER	7.2732	chr3:69084812-69085062	chr3	69084812	69085062	[7.2732]	7	+	69084944	ARL6IP5	ENST00000273258.3	84	+	69085021	ARL6IP5	ENST00000478935.1
H929	30589	chr19	9140404	0	0	PROMOTER	6.50139	chr19:9140279-9140529	chr19	9140279	9140529	[6.50139]	7	+	9140397	ZNF317	ENST00000360385.7	24	+	9140380	ZNF317	ENST00000247956.10
H929	30759	chr19	19516220	0	0	PROMOTER	6.25562	chr19:19516095-19516345	chr19	19516095	19516345	[6.25562]	7	+	19516227	CTC-260F20.3	ENST00000555938.1	8	+	19516228	NDUFA13	ENST00000503283.5	10	+	19516230	NDUFA13	ENST00000428459.6	465	+	19515755	NDUFA13	ENST00000507754.8	535	-	19515685	TSSK6	ENST00000585580.3
H929	14349	chr6	28225282	25.48	58	PROMOTER	5.77469	chr6:28225157-28225407	chr6	28225157	28225407	[3.65, 5.77469, 3.89]	7	+	28225275	ZSCAN9	ENST00000425468.6	10	+	28225292	ZSCAN9	ENST00000252207.9:ENST00000531979.5	18	+	28225264	ZSCAN9	ENST00000531981.5	57	+	28225339	ZSCAN9	ENST00000527436.5
H929	14471	chr6	32844055	4	8	PROMOTER	32.4221	chr6:32843930-32844180	chr6	32843930	32844180	[32.42207, 13.95]	8	-	32844047	PSMB8	ENST00000374882.7	35	-	32844020	PSMB8	ENST00000395339.7	53	+	32844108	XXbac-BPG246D15.8	ENST00000458296.1	78	+	32844133	XXbac-BPG246D15.8	ENST00000429600.1	81	+	32844136	PSMB9	ENST00000395330.5	648	-	32844703	PSMB8	ENST00000374881.2
H929	16858	chr7	103344865	3.46	7	PROMOTER	25.938	chr7:103344740-103344990	chr7	103344740	103344990	[10.78, 25.93798]	8	-	103344873	DNAJC2	ENST00000379263.7	35	-	103344830	DNAJC2	ENST00000412522.1	49	+	103344914	PSMC2	ENST00000435765.5	199	-	103344666	DNAJC2	ENST00000249270.11
H929	30664	chr19	12891168	0	0	PROMOTER	16.1447	chr19:12891043-12891293	chr19	12891043	12891293	[16.14474]	8	+	12891160	GCDH	ENST00000591470.5	142	+	12891026	GCDH	ENST00000222214.9
H929	1731	chr1	159009910	6.48	13	PROMOTER	15.8999	chr1:159009785-159010035	chr1	159009785	159010035	[2.38, 15.89994]	8	+	159009918	IFI16	ENST00000368132.7	17	+	159009927	IFI16	ENST00000295809.11	18	+	159009892	IFI16	ENST00000340979.10:ENST00000368131.8	100	+	159010010	IFI16	ENST00000359709.7
H929	24021	chr11	124115442	18.49	37	PROMOTER	13.733	chr11:124115317-124115567	chr11	124115317	124115567	[13.73295, 4.44]	8	+	124115450	VWA5A	ENST00000392744.4	38	+	124115404	VWA5A	ENST00000392748.5:ENST00000361352.9:ENST00000449321.5	80	+	124115362	VWA5A	ENST00000456829.6
H929	10414	chr4	186191528	2	4	PROMOTER	12.04	chr4:186191403-186191653	chr4	186191403	186191653	[9.17, 12.04]	8	+	186191520	CYP4V2	ENST00000378802.4	38	-	186191490	RP11-173M11.6	ENST00000623820.1
H929	28757	chr17	32342197	4.47	9	PROMOTER	11.5701	chr17:32342072-32342322	chr17	32342072	32342322	[11.57006, 5.88]	8	-	32342189	C17orf75	ENST00000577809.5	12	-	32342209	C17orf75	ENST00000225805.8
H929	366	chr1	28329047	0	1	PROMOTER	9.86053	chr1:28328922-28329172	chr1	28328922	28329172	[6.77, 9.86053]	8	+	28329055	MED18	ENST00000398997.2	9	+	28329038	MED18	ENST00000373842.8
H929	10013	chr4	151099616	0	0	PROMOTER	9.00732	chr4:151099491-151099741	chr4	151099491	151099741	[9.00732]	8	+	151099624	RPS3A	ENST00000509736.5	13	+	151099629	RPS3A	ENST00000514682.5	23	+	151099639	RPS3A	ENST00000512690.5	43	+	151099573	RPS3A	ENST00000274065.8	58	+	151099674	RPS3A	ENST00000506126.5
H929	3591	chr1	240612157	104.5	209	PROMOTER	8.15509	chr1:240612032-240612282	chr1	240612032	240612282	[1.50598, 8.15509]	8	-	240612149	GREM2	ENST00000318160.4
H929	1344	chr1	150067301	0	0	PROMOTER	6.75547	chr1:150067176-150067426	chr1	150067176	150067426	[6.75547]	8	+	150067293	VPS45	ENST00000535106.5	11	+	150067312	VPS45	ENST00000369130.7	22	+	150067279	VPS45	ENST00000643970.1	81	+	150067382	VPS45	ENST00000369128.9	136	-	150067165	CH17-55D9.1	ENST00000642888.1	367	+	150067668	VPS45	ENST00000611412.4	486	+	150067787	VPS45	ENST00000644510.1	498	+
H929	6508	chr3	10321170	0	0	PROMOTER	6.24722	chr3:10321045-10321295	chr3	10321045	10321295	[6.24722]	8	-	10321178	SEC13	ENST00000350697.7	86	-	10321084	SEC13	ENST00000383801.6	88	-	10321082	SEC13	ENST00000337354.8	109	-	10321061	SEC13	ENST00000397117.5	129	-	10321041	SEC13	ENST00000397109.7
H929	30735	chr19	17267435	0	0	PROMOTER	5.59278	chr19:17267310-17267560	chr19	17267310	17267560	[5.59278]	8	+	17267443	BABAM1	ENST00000601043.5	17	+	17267418	CTD-2278I10.6	ENST00000596542.1	49	+	17267386	BABAM1	ENST00000359435.8	59	+	17267376	BABAM1	ENST00000447614.6	67	+	17267502	BABAM1	ENST00000595632.5	85	+	17267350	BABAM1	ENST00000598188.5
H929	25298	chr12	108635802	0	0	PROMOTER	5.06748	chr12:108635677-108635927	chr12	108635677	108635927	[5.06748]	8	+	108635810	MIR4496	ENST00000635896.1	47	+	108635849	RP11-689B22.2	ENST00000547282.1	1843	-	108633959	SELPLG	ENST00000550948.1
H929	23442	chr11	105035166	6	12	PROMOTER	45.5442	chr11:105035041-105035291	chr11	105035041	105035291	[45.54425, 12.97]	9	-	105035157	CASP1	ENST00000353247.9:ENST00000446369.5	17	-	105035149	CASP1	ENST00000533400.5:ENST00000525825.5	19	-	105035147	CASP1	ENST00000528974.1	37	-	105035129	CASP1	ENST00000527979.5	53	-	105035113	CASP1	ENST00000526568.5:ENST00000531166.5:ENST00000534497.5	84	-	105035250	CASP1	ENST00000436863.7	691	-	105034475	CASP1	ENST00000640184.1
H929	12735	chr5	124893369	5	10	PROMOTER	42.7167	chr5:124893244-124893494	chr5	124893244	124893494	[42.71672, 19.52]	9	+	124893360	RP11-756H20.1	ENST00000642446.1:ENST00000647105.1
H929	31834	chr20	57620464	4.47	9	PROMOTER	17.7893	chr20:57620339-57620589	chr20	57620339	57620589	[7.62, 17.78927]	9	-	57620473	ZBP1	ENST00000371173.7	70	-	57620394	ZBP1	ENST00000541799.1	112	-	57620576	ZBP1	ENST00000395822.7
H929	13727	chr5	174045613	0	0	PROMOTER	14.2131	chr5:174045488-174045738	chr5	174045488	174045738	[14.21313]	9	+	174045604	NSG2	ENST00000303177.7	131	+	174045744	NSG2	ENST00000521585.5
H929	14624	chr6	44247096	9	18	PROMOTER	9.73542	chr6:44246971-44247221	chr6	44246971	44247221	[9.73542, 7.81]	9	+	44247087	HSP90AB1	ENST00000353801.7:ENST00000371646.9	770	+	44247866	HSP90AB1	ENST00000371554.2	930	+	44246166	HSP90AB1	ENST00000620073.4
H929	4721	chr2	88628180	0	0	PROMOTER	8.10232	chr2:88628055-88628305	chr2	88628055	88628305	[8.10232]	9	+	88628171	AC062029.1	ENST00000606164.1	604	-	88627576	EIF2AK3	ENST00000303236.7	641	+	88627539	AC062029.1	ENST00000453008.2
H929	1496	chr1	154104601	0	0	PROMOTER	7.12512	chr1:154104476-154104726	chr1	154104476	154104726	[7.12512]	9	-	154104592	MIR5698	ENST00000577643.1
H929	25321	chr12	110049276	0	0	PROMOTER	5.67647	chr12:110049151-110049401	chr12	110049151	110049401	[5.67647]	9	-	110049285	C12orf76	ENST00000549724.1	711	-	110048565	C12orf76	ENST00000551185.2	721	-	110048555	C12orf76	ENST00000546651.3	724	-	110048552	C12orf76	ENST00000547573.1	754	-	110048522	C12orf76	ENST00000546627.1
H929	22859	chr11	65888548	0	0	PROMOTER	5.07554	chr11:65888423-65888673	chr11	65888423	65888673	[5.07554]	9	-	65888539	FIBP	ENST00000357519.8	17	-	65888531	FIBP	ENST00000338369.6	34	-	65888514	FIBP	ENST00000533045.5	1564	+	65890112	CCDC85B	ENST00000312579.3
H929	4448	chr2	61017235	4	8	PROMOTER	33.6601	chr2:61017110-61017360	chr2	61017110	61017360	[19.06, 33.66008]	10	+	61017225	PEX13	ENST00000444100.2	42	-	61017193	PUS10	ENST00000407787.5:ENST00000398658.2	327	+	61017562	PEX13	ENST00000401576.1	487	+	61017722	PEX13	ENST00000295030.5	495	+	61017730	PEX13	ENST00000414712.2	1019	-	61018254	PUS10	ENST00000316752.10
H929	19732	chr8	143986470	1	2	PROMOTER	25.938	chr8:143986345-143986595	chr8	143986345	143986595	[6.67, 25.93798]	10	-	143986460	PARP10	ENST00000525773.5	16	-	143986454	PARP10	ENST00000313028.11	24	-	143986446	PARP10	ENST00000524918.5
H929	12957	chr5	138337501	9.49	19	PROMOTER	15.6623	chr5:138337376-138337626	chr5	138337376	138337626	[15.66233, 9.77]	10	+	138337511	FAM53C	ENST00000434981.6	531	+	138338032	FAM53C	ENST00000239906.9	765	+	138338266	FAM53C	ENST00000513056.5	854	-	138338355	CDC25C	ENST00000513970.5
H929	2427	chr1	173714994	0	0	PROMOTER	12.1774	chr1:173714869-173715119	chr1	173714869	173715119	[12.17742]	10	+	173714984	KLHL20	ENST00000209884.4
H929	28723	chr17	28926265	9	18	PROMOTER	9.39193	chr17:28926140-28926390	chr17	28926140	28926390	[2.8, 9.39193]	10	+	28926275	RP11-20B24.5	ENST00000580782.1	276	+	28926541	RP11-20B24.5	ENST00000582631.1
H929	24790	chr12	56158406	0	0	PROMOTER	7.32272	chr12:56158281-56158531	chr12	56158281	56158531	[7.32272]	10	+	56158396	MYL6	ENST00000548293.5	24	+	56158382	MYL6	ENST00000548400.5	37	+	56158369	MYL6	ENST00000551589.5	38	+	56158368	MYL6	ENST00000547408.5	44	+	56158362	MYL6	ENST00000536128.5:ENST00000547649.5	48	+	56158358	MYL6	ENST00000549566.5	49	+	56158357	MYL6	ENST00000549017.5	50	+
H929	13182	chr5	148238562	0	0	PROMOTER	6.75547	chr5:148238437-148238687	chr5	148238437	148238687	[6.75547]	10	+	148238572	CTC-295J13.3	ENST00000638089.1
H929	32371	chr22	37686350	0	0	PROMOTER	5.10526	chr22:37686225-37686475	chr22	37686225	37686475	[5.10526]	10	+	37686360	NOL12	ENST00000611699.1	27	+	37686323	NOL12	ENST00000359114.8	64	+	37686414	RP1-37E16.12	ENST00000455236.4
H929	1972	chr1	163321803	5	10	PROMOTER	223.82	chr1:163321678-163321928	chr1	163321678	163321928	[55.85631, 223.82]	11	-	163321792	RP11-267N12.3	ENST00000449680.5	12	-	163321791	RGS5	ENST00000618415.4	29	-	163321774	RP11-267N12.3	ENST00000526176.1	51	-	163321752	RP11-267N12.3	ENST00000528689.5:ENST00000439699.1	91	-	163321894	RP11-267N12.3	ENST00000429865.5	97	+	163321900	NUF2	ENST00000524800.5	99	-	163321704	RP11-267N12.3	ENST00000528019.5	132	+
H929	22384	chr11	10809121	6.48	13	PROMOTER	53.73	chr11:10808996-10809246	chr11	10808996	10809246	[50.16365, 53.73]	11	-	10809110	EIF4G2	ENST00000339995.9	176	+	10809297	RP11-685M7.3	ENST00000499765.1	413	-	10808708	EIF4G2	ENST00000396525.6	1148	-	10807973	EIF4G2	ENST00000526148.5	1659	-	10807462	EIF4G2	ENST00000525681.5	1826	-	10807295	EIF4G2	ENST00000640650.1
H929	28759	chr17	32523413	6.48	13	PROMOTER	36.8509	chr17:32523288-32523538	chr17	32523288	32523538	[36.85093, 20.9]	11	-	32523424	RP11-466A19.8	ENST00000578408.1
H929	27390	chr15	81296902	0	1	PROMOTER	27.5405	chr15:81296777-81297027	chr15	81296777	81297027	[27.54052, 22.13]	11	+	81296913	IL16	ENST00000394652.6
H929	22163	chr10	121975228	1	2	PROMOTER	16.2109	chr10:121975103-121975353	chr10	121975103	121975353	[16.21085, 4.21]	11	-	121975217	NSMCE4A	ENST00000369023.7	34	-	121975194	NSMCE4A	ENST00000369017.5
H929	19279	chr8	109540188	5.48	11	PROMOTER	14.41	chr8:109540063-109540313	chr8	109540063	109540313	[8.46618, 14.41]	11	+	109540177	EBAG9	ENST00000337573.9	113	+	109540075	EBAG9	ENST00000614147.1	438	+	109540626	EBAG9	ENST00000620557.4	477	+	109539711	EBAG9	ENST00000395785.6
H929	30351	chr18	74148500	0	0	PROMOTER	12.3569	chr18:74148375-74148625	chr18	74148375	74148625	[12.35688]	11	+	74148511	TIMM21	ENST00000169551.10	23	+	74148523	TIMM21	ENST00000580087.5	635	-	74147865	FBXO15	ENST00000419743.6
H929	17732	chr8	28890383	1.41	3	PROMOTER	11.2019	chr8:28890258-28890508	chr8	28890258	28890508	[11.20188, 5.04]	11	+	28890394	HMBOX1	ENST00000287701.14	12	+	28890395	HMBOX1	ENST00000558662.5	21	+	28890404	HMBOX1	ENST00000523613.5:ENST00000397358.7	141	-	28890242	INTS9	ENST00000416984.6	242	+	28890625	HMBOX1	ENST00000519047.5	419	-	28889964	INTS9	ENST00000521022.5	468	-	28889915	INTS9	ENST00000521777.5	933	+
H929	3344	chr1	222589902	3.46	7	PROMOTER	11.1429	chr1:222589777-222590027	chr1	222589777	222590027	[11.14292, 2.67]	11	-	222589913	TAF1A	ENST00000352967.8	29	+	222589931	RP11-378J18.3	ENST00000427540.1	31	-	222589933	TAF1A	ENST00000350027.8	60	+	222589962	RP11-378J18.3	ENST00000413074.1	117	-	222589785	TAF1A	ENST00000366890.5
H929	28637	chr17	16981342	12	24	PROMOTER	9.96	chr17:16981217-16981467	chr17	16981217	16981467	[9.30081, 9.96]	11	-	16981353	AC104024.1	ENST00000428142.1
H929	24689	chr12	48852152	4.47	9	PROMOTER	9.86085	chr12:48852027-48852277	chr12	48852027	48852277	[9.86085, 7.53]	11	-	48852163	DDX23	ENST00000308025.7
H929	33064	chrX	131830632	0	0	PROMOTER	9.7913	chrX:131830507-131830757	chrX	131830507	131830757	[9.7913]	11	-	131830643	FIRRE	ENST00000427391.2
H929	28898	chr17	42833153	1.41	3	PROMOTER	9.50145	chr17:42833028-42833278	chr17	42833028	42833278	[6.57, 9.50145]	11	+	42833142	PSME3	ENST00000541124.5:ENST00000622892.4	246	+	42833399	PSME3	ENST00000590720.5	265	+	42833418	PSME3	ENST00000441946.6	318	+	42833471	PSME3	ENST00000293362.7	343	+	42833496	PSME3	ENST00000592169.2
H929	32392	chr22	38982336	3.46	7	PROMOTER	9.14121	chr22:38982211-38982461	chr22	38982211	38982461	[9.14121, 4.39]	11	+	38982347	APOBEC3B	ENST00000407298.7	63	+	38982399	APOBEC3B	ENST00000402182.7	73	+	38982409	APOBEC3B	ENST00000333467.3
H929	20978	chr10	5813560	0	0	PROMOTER	9.10135	chr10:5813435-5813685	chr10	5813435	5813685	[9.10135]	11	-	5813549	GDI2	ENST00000380191.8	149	-	5813411	GDI2	ENST00000380181.7	425	+	5813985	RP11-318E3.9	ENST00000608273.1
H929	26635	chr14	94026389	0	0	PROMOTER	8.1241	chr14:94026264-94026514	chr14	94026264	94026514	[8.1241]	11	+	94026378	OTUB2	ENST00000553723.1	60	+	94026329	OTUB2	ENST00000203664.9
H929	31891	chr20	62804864	0	0	PROMOTER	7.62932	chr20:62804739-62804989	chr20	62804739	62804989	[7.62932]	11	+	62804853	OGFR	ENST00000621591.4	29	+	62804835	OGFR	ENST00000290291.10	723	-	62805587	RP5-885L7.11	ENST00000431361.1	1022	+	62805886	OGFR	ENST00000370461.5
H929	25949	chr14	22982909	0	0	PROMOTER	7.49674	chr14:22982784-22983034	chr14	22982784	22983034	[7.49674]	11	+	22982898	RP11-298I3.4	ENST00000555294.1	211	+	22982698	RP11-298I3.4	ENST00000557615.5	267	-	22982642	AJUBA	ENST00000262713.6	571	-	22982338	AJUBA	ENST00000361265.8	651	-	22982258	RP11-298I3.5	ENST00000555074.1
H929	5399	chr2	164991973	0	0	PROMOTER	7.14927	chr2:164991848-164992098	chr2	164991848	164992098	[7.14927]	11	+	164991984	AC013463.2	ENST00000431341.1
H929	25744	chr13	49628310	3	6	PROMOTER	7.14927	chr13:49628185-49628435	chr13	49628185	49628435	[7.14927, 2.4]	11	+	49628299	ARL11	ENST00000282026.1
H929	28166	chr16	67227157	0	0	PROMOTER	7.12313	chr16:67227032-67227282	chr16	67227032	67227282	[7.12313]	11	+	67227168	TMEM208	ENST00000565201.1	37	+	67227120	TMEM208	ENST00000563953.5	44	+	67227113	TMEM208	ENST00000304800.13	159	-	67226998	AC040160.13	ENST00000629962.2	339	-	67226818	AC040160.13	ENST00000393992.5
H929	26344	chr14	74713155	0	0	PROMOTER	6.44607	chr14:74713030-74713280	chr14	74713030	74713280	[6.44607]	11	+	74713144	FCF1	ENST00000341162.8	15	+	74713170	FCF1	ENST00000534938.6:ENST00000553615.5	40	-	74713115	AREL1	ENST00000356357.8	1219	+	74711936	RF00409	ENST00000410672.2
H929	32388	chr22	38794187	0	0	PROMOTER	6.08413	chr22:38794062-38794312	chr22	38794062	38794312	[6.08413]	11	-	38794198	DNAL4	ENST00000406199.3	14	-	38794173	DNAL4	ENST00000216068.8	44	-	38794143	SUN2	ENST00000406622.5
H929	16095	chr7	23680775	0	0	PROMOTER	5.26866	chr7:23680650-23680900	chr7	23680650	23680900	[5.26866]	11	-	23680786	AC006026.13	ENST00000454029.1	591	+	23680184	FAM221A	ENST00000409653.5:ENST00000409994.3	645	+	23680130	FAM221A	ENST00000409192.7:ENST00000344962.8
H929	5251	chr2	151261767	0	0	PROMOTER	5.07554	chr2:151261642-151261892	chr2	151261642	151261892	[5.07554]	11	-	151261778	RBM43	ENST00000409092.1	112	-	151261879	RBM43	ENST00000331426.5
H929	1829	chr1	160796124	1	2	PROMOTER	64.3078	chr1:160795999-160796249	chr1	160795999	160796249	[49.46, 64.30782]	12	+	160796112	LY9	ENST00000392203.8	34	+	160796158	LY9	ENST00000263285.10	50	+	160796074	LY9	ENST00000368037.9	63	+	160796187	LY9	ENST00000368039.2
H929	30641	chr19	11324429	0	1	PROMOTER	30.3382	chr19:11324304-11324554	chr19	11324304	11324554	[22.61, 30.33823]	12	-	11324441	CTC-510F12.4	ENST00000586356.5
H929	29147	chr17	63773558	6	12	PROMOTER	20.3687	chr17:63773433-63773683	chr17	63773433	63773683	[20.36871, 11.2]	12	-	63773570	CCDC47	ENST00000403162.7:ENST00000582252.1	217	-	63773775	CCDC47	ENST00000225726.9	305	+	63773863	DDX42	ENST00000578681.5	326	+	63773884	DDX42	ENST00000583590.5	631	+	63774189	DDX42	ENST00000389924.6	632	+	63774190	DDX42	ENST00000359353.9
H929	22787	chr11	62591625	4.47	9	PROMOTER	16.7793	chr11:62591500-62591750	chr11	62591500	62591750	[16.77925, 5.89]	12	-	62591637	TUT1	ENST00000308436.11	94	-	62591531	RP11-864I4.1	ENST00000496634.2	552	-	62592177	TUT1	ENST00000476907.5
H929	26654	chr14	95620926	17.83	43	PROMOTER	16.4984	chr14:95620801-95621051	chr14	95620801	95621051	[11.86, 16.49842, 8.78]	12	+	95620914	RP11-1070N10.5	ENST00000555032.1
H929	23035	chr11	82997401	13.49	27	PROMOTER	16.3737	chr11:82997276-82997526	chr11	82997276	82997526	[16.37365, 8.39]	12	-	82997413	RAB30	ENST00000525117.5:ENST00000532548.5
H929	27166	chr15	64095981	5	10	PROMOTER	11.21	chr15:64095856-64096106	chr15	64095856	64096106	[11.21002, 2.52]	12	+	64095993	SNX1	ENST00000261889.9	19	+	64096000	SNX1	ENST00000559844.5	33	+	64096014	SNX1	ENST00000625244.2:ENST00000561026.5	1858	+	64094123	SNX1	ENST00000560829.5	1963	-	64094018	CIAO2A	ENST00000300030.7
H929	1874	chr1	161706960	4.47	9	PROMOTER	9.49187	chr1:161706835-161707085	chr1	161706835	161707085	[1.69, 9.49187]	12	+	161706972	FCRLA	ENST00000236938.10:ENST00000350710.3:ENST00000367949.6:ENST00000367959.6:ENST00000540521.5:ENST00000546024.5	249	+	161707209	FCRLA	ENST00000367957.6	284	+	161707244	FCRLA	ENST00000349527.8	305	+	161707265	FCRLA	ENST00000294796.8:ENST00000309691.10:ENST00000367953.7	335	+	161707295	FCRLA	ENST00000367950.1
H929	26529	chr14	90397017	0	0	PROMOTER	8.88174	chr14:90396892-90397142	chr14	90396892	90397142	[8.88174]	12	+	90397029	CALM1	ENST00000447653.7	15	+	90397032	CALM1	ENST00000626705.2	34	+	90396983	CALM1	ENST00000356978.8	39	+	90397056	CALM1	ENST00000553542.5	1245	+	90398262	CALM1	ENST00000544280.6
H929	22702	chr11	47248831	0	0	PROMOTER	8.62999	chr11:47248706-47248956	chr11	47248706	47248956	[8.62999]	12	-	47248819	ACP2	ENST00000527256.5	26	-	47248805	ACP2	ENST00000530453.4	29	-	47248802	ACP2	ENST00000529444.5	75	-	47248906	ACP2	ENST00000256997.7	85	+	47248916	NR1H3	ENST00000395397.7:ENST00000405576.5	93	+	47248924	NR1H3	ENST00000481889.6	125	+	47248956	NR1H3	ENST00000407404.5	203	-
H929	4330	chr2	47176523	0	0	PROMOTER	8.57326	chr2:47176398-47176648	chr2	47176398	47176648	[8.57326]	12	-	47176511	CALM2	ENST00000409563.5	12	-	47176511	RP11-761B3.1	ENST00000422269.1	78	-	47176601	CALM2	ENST00000272298.11:ENST00000628793.2
H929	22813	chr11	63986401	0	0	PROMOTER	7.6212	chr11:63986276-63986526	chr11	63986276	63986526	[7.6212]	12	+	63986413	OTUB1	ENST00000538426.5	45	+	63986446	OTUB1	ENST00000543004.5	389	+	63986012	OTUB1	ENST00000428192.6	396	+	63986005	OTUB1	ENST00000535715.5	404	+	63985997	OTUB1	ENST00000541478.5	441	+	63986842	OTUB1	ENST00000543988.1	548	+	63985853	OTUB1	ENST00000422031.6
H929	656	chr1	54715810	1.41	3	PROMOTER	6.9194	chr1:54715685-54715935	chr1	54715685	54715935	[3.21, 6.9194]	12	+	54715822	TTC4	ENST00000371281.3
H929	22361	chr11	9460714	0	0	PROMOTER	6.75547	chr11:9460589-9460839	chr11	9460589	9460839	[6.75547]	12	-	9460702	CTD-2371O3.3	ENST00000596206.2	192	+	9460522	ZNF143	ENST00000396604.5	251	+	9460965	ZNF143	ENST00000396602.6	262	+	9460976	ZNF143	ENST00000530463.5	273	+	9460987	ZNF143	ENST00000396597.7	309	+	9461023	ZNF143	ENST00000299606.6
H929	4228	chr2	38751482	0	0	PROMOTER	6.73299	chr2:38751357-38751607	chr2	38751357	38751607	[6.73299]	12	-	38751494	SRSF7	ENST00000313117.10:ENST00000446327.6	52	+	38751534	GEMIN6	ENST00000409011.5	124	-	38751358	SRSF7	ENST00000409276.5
H929	25714	chr13	41263565	8.49	17	PROMOTER	6.44607	chr13:41263440-41263690	chr13	41263440	41263690	[6.44607, 2.27]	12	-	41263577	MTRF1	ENST00000379480.8:ENST00000430347.3	81	-	41263484	MTRF1	ENST00000379477.5
H929	4388	chr2	54115492	0	0	PROMOTER	5.89347	chr2:54115367-54115617	chr2	54115367	54115617	[5.89347]	12	+	54115504	ACYP2	ENST00000303536.8:ENST00000394666.7	89	+	54115403	ACYP2	ENST00000406041.5
H929	4963	chr2	113175325	3.46	7	PROMOTER	5.51136	chr2:113175200-113175450	chr2	113175200	113175450	[1.06, 5.51136]	12	-	113175337	AC016683.5	ENST00000446590.1	35	-	113175360	AC016683.5	ENST00000438409.1	1328	+	113173997	PSD4	ENST00000441564.7	1354	+	113173971	PSD4	ENST00000245796.10
H929	6066	chr2	216412401	52.35	113	PROMOTER	25.6145	chr2:216412276-216412526	chr2	216412276	216412526	[5.59, 11.37, 25.61445]	13	+	216412414	SMARCAL1	ENST00000357276.8	295	-	216412696	AC098820.2	ENST00000457694.1	342	+	216412743	SMARCAL1	ENST00000358207.9
H929	26284	chr14	70417032	5	10	PROMOTER	19.9151	chr14:70416907-70417157	chr14	70416907	70417157	[19.91505, 4.54]	13	-	70417045	SYNJ2BP	ENST00000256366.5	42	-	70417074	SYNJ2BP-COX16	ENST00000621525.4
H929	26944	chr15	40569313	7	14	PROMOTER	12.7338	chr15:40569188-40569438	chr15	40569188	40569438	[12.73375, 4.16]	13	+	40569300	RPUSD2	ENST00000315616.11	19	+	40569332	RPUSD2	ENST00000559271.1
H929	1588	chr1	156282966	0	0	PROMOTER	10.2826	chr1:156282841-156283091	chr1	156282841	156283091	[10.28261]	13	+	156282953	TMEM79	ENST00000357501.6	18	+	156282948	TMEM79	ENST00000295694.9	141	-	156282825	SMG5	ENST00000361813.5	1313	+	156284279	TMEM79	ENST00000405535.2
H929	21338	chr10	31319138	71.18	152	PROMOTER	9.05316	chr10:31319013-31319263	chr10	31319013	31319263	[3.34, 9.05316, 3.03]	13	+	31319125	ZEB1	ENST00000320985.14	34	+	31319172	ZEB1	ENST00000361642.9	74	+	31319212	ZEB1	ENST00000560721.6	76	-	31319062	ZEB1-AS1	ENST00000607455.1	84	+	31319222	ZEB1	ENST00000542815.7	103	-	31319035	ZEB1-AS1	ENST00000450834.2	108	-	31319030	ZEB1-AS1	ENST00000607166.1	111	-
H929	16921	chr7	106598921	1	2	PROMOTER	8.25481	chr7:106598796-106599046	chr7	106598796	106599046	[1.26, 8.25481]	13	-	106598908	CTB-30L5.1	ENST00000591803.1
H929	8144	chr3	157160200	0	0	PROMOTER	8.25306	chr3:157160075-157160325	chr3	157160075	157160325	[8.25306]	13	-	157160213	CCNL1	ENST00000295926.7	106	-	157160094	CCNL1	ENST00000295925.5	560	-	157160760	CCNL1	ENST00000461804.5
H929	13137	chr5	146203563	0	0	PROMOTER	8.13668	chr5:146203438-146203688	chr5	146203438	146203688	[8.13668]	13	+	146203550	RP11-449H3.3	ENST00000506502.2	37	+	146203600	RBM27	ENST00000265271.6
H929	27882	chr16	21953301	0	0	PROMOTER	7.97	chr16:21953176-21953426	chr16	21953176	21953426	[7.97]	13	+	21953288	UQCRC2	ENST00000630839.2	70	+	21953371	UQCRC2	ENST00000561553.5	641	+	21952660	UQCRC2	ENST00000268379.8	1593	-	21951708	CTD-2649C14.2	ENST00000616774.1
H929	14444	chr6	31620707	0	0	PROMOTER	7.77574	chr6:31620582-31620832	chr6	31620582	31620832	[7.77574]	13	+	31620720	PRRC2A	ENST00000376007.8	18	+	31620725	PRRC2A	ENST00000376033.2
H929	32901	chrX	101390903	0	0	PROMOTER	6.75547	chrX:101390778-101391028	chrX	101390778	101391028	[6.75547]	13	+	101390890	RPL36A	ENST00000614077.4	79	+	101390824	RPL36A	ENST00000427805.6	80	+	101390983	RPL36A	ENST00000553110.7	86	+	101390989	RPL36A	ENST00000392994.7	107	-	101390796	BTK	ENST00000621635.4	108	+	101391011	RPL36A-HNRNPH2	ENST00000409338.5	109	+	101391012	RPL36A-HNRNPH2	ENST00000409170.3	299	+
H929	4437	chr2	60555141	0	0	PROMOTER	6.58312	chr2:60555016-60555266	chr2	60555016	60555266	[6.58312]	13	-	60555154	BCL11A	ENST00000642384.1	674	-	60554467	BCL11A	ENST00000646249.1	1483	-	60553658	BCL11A	ENST00000335712.11	1507	-	60553634	BCL11A	ENST00000359629.10	1509	-	60553632	BCL11A	ENST00000643716.1	1570	-	60553571	BCL11A	ENST00000356842.9	1583	-	60553558	BCL11A	ENST00000642439.1	1641	-
H929	8845	chr4	25869563	0	0	PROMOTER	6.27171	chr4:25869438-25869688	chr4	25869438	25869688	[6.27171]	13	-	25869550	RP13-494C23.1	ENST00000503085.1
H929	24785	chr12	56041819	0	0	PROMOTER	5.68548	chr12:56041694-56041944	chr12	56041694	56041944	[5.68548]	13	-	56041806	RP11-603J24.4	ENST00000551846.1	74	+	56041893	RPS26	ENST00000552361.1	99	+	56041918	RPS26	ENST00000646449.1	468	+	56041351	RPS26	ENST00000356464.10
H929	14402	chr6	30067192	0	0	PROMOTER	5.07554	chr6:30067067-30067317	chr6	30067067	30067317	[5.07554]	13	+	30067205	PPP1R11	ENST00000376769.6	104	+	30067088	PPP1R11	ENST00000376772.7	351	+	30067543	PPP1R11	ENST00000376765.6	384	+	30067576	PPP1R11	ENST00000376763.5	483	+	30066709	PPP1R11	ENST00000376773.5	1014	+	30068206	PPP1R11	ENST00000376758.1
H929	22728	chr11	57741339	4	8	PROMOTER	16.9556	chr11:57741214-57741464	chr11	57741214	57741464	[16.95557, 7.84]	14	+	57741353	SELENOH	ENST00000534355.5	89	+	57741250	SELENOH	ENST00000622257.4	233	+	57741572	SELENOH	ENST00000388857.8	824	+	57742163	RP11-691N7.6	ENST00000531074.1
H929	9524	chr4	99816819	27.42	67	PROMOTER	16.0016	chr4:99816694-99816944	chr4	99816694	99816944	[2.27, 16.00155, 7.78]	14	+	99816833	DAPP1	ENST00000296414.11	27	+	99816846	DAPP1	ENST00000512369.1
H929	24062	chr11	125903207	7.48	15	PROMOTER	14.09	chr11:125903082-125903332	chr11	125903082	125903332	[14.09, 13.50019]	14	-	125903221	PUS3	ENST00000227474.7:ENST00000613398.4	169	+	125903376	DDX25	ENST00000525943.1	1156	+	125904363	DDX25	ENST00000263576.10
H929	5684	chr2	189784350	0	0	PROMOTER	13.0252	chr2:189784225-189784475	chr2	189784225	189784475	[13.02516]	14	-	189784364	ORMDL1	ENST00000392350.7	21	-	189784371	ORMDL1	ENST00000392349.8	31	+	189784381	PMS1	ENST00000441310.6	32	-	189784318	ORMDL1	ENST00000409519.5	100	+	189784450	PMS1	ENST00000409985.5	151	+	189784501	PMS1	ENST00000409823.7	158	+	189784508	PMS1	ENST00000374826.8	194	+
H929	6903	chr3	45388590	1	2	PROMOTER	10.4512	chr3:45388465-45388715	chr3	45388465	45388715	[10.45118, 4.22]	14	+	45388576	LARS2	ENST00000645846.1	26	+	45388564	LARS2	ENST00000414984.5	29	+	45388561	LARS2	ENST00000415258.5	84	+	45388506	LARS2	ENST00000265537.7	246	+	45388836	LARS2	ENST00000642274.1
H929	17629	chr8	22580457	0	0	PROMOTER	10.0672	chr8:22580332-22580582	chr8	22580332	22580582	[10.06719]	14	+	22580471	PDLIM2	ENST00000622702.1:ENST00000409141.5	33	+	22580490	PDLIM2	ENST00000265810.8	72	+	22580529	PDLIM2	ENST00000409417.5	1307	+	22579150	PDLIM2	ENST00000397761.6	1327	+	22579130	PDLIM2	ENST00000397760.8	1716	+	22578741	PDLIM2	ENST00000339162.11:ENST00000308354.11
H929	8916	chr4	37001802	2	4	PROMOTER	8.25481	chr4:37001677-37001927	chr4	37001677	37001927	[8.25481, 3.21]	14	+	37001816	RP11-103J17.2	ENST00000562049.1
H929	1554	chr1	155241289	3	6	PROMOTER	7.99819	chr1:155241164-155241414	chr1	155241164	155241414	[7.99819, 1.88]	14	-	155241275	GBA	ENST00000427500.7	55	-	155241234	GBA	ENST00000368373.7
H929	22764	chr11	60842057	6.48	13	PROMOTER	7.62964	chr11:60841932-60842182	chr11	60841932	60842182	[7.62964, 6.13]	14	+	60842071	CCDC86	ENST00000227520.9	908	-	60842965	RP11-804A23.2	ENST00000539897.1
H929	12485	chr5	112861236	4.47	9	PROMOTER	7.6212	chr5:112861111-112861361	chr5	112861111	112861361	[4.92, 7.6212]	14	+	112861222	SRP19	ENST00000505459.5	48	+	112861188	SRP19	ENST00000503445.5	69	+	112861305	SRP19	ENST00000282999.7:ENST00000391338.3	74	+	112861310	SRP19	ENST00000515463.1	89	+	112861325	SRP19	ENST00000621420.5	96	+	112861332	SRP19	ENST00000445150.3
H929	21832	chr10	96271502	26	52	PROMOTER	6.75547	chr10:96271377-96271627	chr10	96271377	96271627	[6.75547, 3.25]	14	-	96271516	BLNK	ENST00000413476.6:ENST00000427367.6	38	-	96271540	BLNK	ENST00000224337.9:ENST00000371176.6	104	-	96271398	BLNK	ENST00000495266.1
H929	5832	chr2	200306538	7.48	15	PROMOTER	6.469	chr2:200306413-200306663	chr2	200306413	200306663	[5.21, 6.469]	14	+	200306524	SPATS2L	ENST00000360760.9	162	+	200306376	SPATS2L	ENST00000451764.6	170	+	200306708	SPATS2L	ENST00000409140.7	379	+	200306159	SPATS2L	ENST00000409385.5	387	+	200306151	SPATS2L	ENST00000409988.7	552	+	200305986	SPATS2L	ENST00000358677.9	645	+	200305893	SPATS2L	ENST00000409718.5
H929	17630	chr8	22604646	0	0	PROMOTER	6.41688	chr8:22604521-22604771	chr8	22604521	22604771	[6.41688]	14	+	22604632	CCAR2	ENST00000308511.8	145	+	22604791	CCAR2	ENST00000521301.5	392	+	22605038	CCAR2	ENST00000389279.7
H929	13707	chr5	173616674	0	0	PROMOTER	6.25562	chr5:173616549-173616799	chr5	173616549	173616799	[6.25562]	14	-	173616660	BOD1	ENST00000311086.8	21	-	173616653	BOD1	ENST00000480951.1	86	-	173616588	BOD1	ENST00000285908.5
H929	13084	chr5	143605642	0	1	PROMOTER	6.08413	chr5:143605517-143605767	chr5	143605517	143605767	[2.82, 6.08413]	14	+	143605628	CTB-57H20.1	ENST00000503323.1
H929	33036	chrX	129906107	0	0	PROMOTER	5.79067	chrX:129905982-129906232	chrX	129905982	129906232	[5.79067]	14	+	129906121	UTP14A	ENST00000425117.6	76	+	129906183	UTP14A	ENST00000394422.7
H929	31028	chr19	48469193	2.45	5	PROMOTER	98.0368	chr19:48469068-48469318	chr19	48469068	48469318	[64.09, 98.03676]	15	+	48469208	CYTH2	ENST00000427476.4	161	+	48469032	CYTH2	ENST00000452733.6	240	+	48469433	CYTH2	ENST00000641098.1	314	-	48469507	CTC-273B12.5	ENST00000600650.1
H929	3783	chr2	6865804	3.46	7	PROMOTER	30.7807	chr2:6865679-6865929	chr2	6865679	6865929	[30.78066, 9.59]	15	-	6865819	CMPK2	ENST00000458098.5	92	-	6865712	CMPK2	ENST00000404168.1	108	-	6865696	CMPK2	ENST00000256722.9
H929	1402	chr1	151459480	0	0	PROMOTER	22.2748	chr1:151459355-151459605	chr1	151459355	151459605	[22.2748]	15	-	151459465	POGZ	ENST00000271715.6	265	-	151459215	POGZ	ENST00000531094.5	301	-	151459179	POGZ	ENST00000368863.6:ENST00000409503.5:ENST00000491586.5
H929	16341	chr7	40134667	3	6	PROMOTER	20.3879	chr7:40134542-40134792	chr7	40134542	40134792	[20.38792, 10.78]	15	-	40134652	MPLKIP	ENST00000306984.7:ENST00000645701.1	310	+	40134977	SUGCT	ENST00000401647.6:ENST00000628514.2:ENST00000335693.8
H929	20475	chr9	97938378	0	0	PROMOTER	17.451	chr9:97938253-97938503	chr9	97938253	97938503	[17.45105]	15	-	97938393	HEMGN	ENST00000616898.1
H929	28068	chr16	53703978	7	14	PROMOTER	16.4792	chr16:53703853-53704103	chr16	53703853	53704103	[9.32, 16.47918]	15	+	53703963	FTO	ENST00000636218.1:ENST00000471389.5	40	-	53703938	RPGRIP1L	ENST00000566096.5	89	-	53703889	RPGRIP1L	ENST00000262135.9:ENST00000647211.1:ENST00000564374.5	91	+	53704069	FTO	ENST00000637001.1	119	-	53703859	RPGRIP1L	ENST00000621565.4	131	-	53703847	RPGRIP1L	ENST00000563746.5:ENST00000568653.7	132	-	53703846	RPGRIP1L	ENST00000379925.7	179	+
H929	12771	chr5	126360147	2	4	PROMOTER	13.2967	chr5:126360022-126360272	chr5	126360022	126360272	[5.05, 13.29674]	15	+	126360132	GRAMD2B	ENST00000513040.5
H929	27639	chr16	1972052	0	0	PROMOTER	11.0569	chr16:1971927-1972177	chr16	1971927	1972177	[11.05686]	15	+	1972037	TBL3	ENST00000568546.5	57	+	1972109	TBL3	ENST00000615855.4	156	-	1971896	AC005363.11	ENST00000618631.1
H929	9953	chr4	145482790	0	1	PROMOTER	10.0701	chr4:145482665-145482915	chr4	145482665	145482915	[2.05, 10.07006]	15	+	145482805	SMAD1	ENST00000394092.6	21	+	145482811	SMAD1	ENST00000515385.1	998	+	145481792	SMAD1	ENST00000302085.8
H929	18008	chr8	42843340	0	0	PROMOTER	9.7839	chr8:42843215-42843465	chr8	42843215	42843465	[9.7839]	15	-	42843325	THAP1	ENST00000254250.7	35	-	42843305	THAP1	ENST00000345117.2
H929	22834	chr11	65422759	11	22	PROMOTER	9.32	chr11:65422634-65422884	chr11	65422634	65422884	[9.32, 5.03528]	15	+	65422774	NEAT1	ENST00000499732.3	39	+	65422798	NEAT1	ENST00000501122.2	41	+	65422800	NEAT1	ENST00000601801.3	45	+	65422804	NEAT1	ENST00000612303.2	337	+	65423096	NEAT1	ENST00000646243.1	366	+	65423125	NEAT1	ENST00000645023.1	514	+	65423273	RF01955	ENST00000620348.1	780	+
H929	22887	chr11	67288532	0	0	PROMOTER	7.2887	chr11:67288407-67288657	chr11	67288407	67288657	[7.2887]	15	+	67288547	ANKRD13D	ENST00000447274.6	759	+	67289291	ANKRD13D	ENST00000511455.6	816	+	67289348	ANKRD13D	ENST00000308440.10	870	+	67289402	ANKRD13D	ENST00000514166.5
H929	28517	chr17	4796129	0	0	PROMOTER	7.18052	chr17:4796004-4796254	chr17	4796004	4796254	[7.18052]	15	+	4796144	PSMB6	ENST00000614486.4:ENST00000270586.7
H929	31201	chr20	18507570	6.48	13	PROMOTER	6.44607	chr20:18507445-18507695	chr20	18507445	18507695	[3.58, 6.44607]	15	+	18507555	SEC23B	ENST00000262544.6	50	+	18507520	SEC23B	ENST00000336714.8	88	+	18507482	SEC23B	ENST00000377475.8	320	+	18507890	SEC23B	ENST00000643747.1	370	+	18507940	SEC23B	ENST00000377465.6
H929	24489	chr12	12725916	0	0	PROMOTER	6.08413	chr12:12725791-12726041	chr12	12725791	12726041	[6.08413]	15	+	12725931	APOLD1	ENST00000326765.10	1905	-	12724011	RP11-180M15.4	ENST00000542291.1
H929	9489	chr4	95091449	0	0	PROMOTER	5.59729	chr4:95091324-95091574	chr4	95091324	95091574	[5.59729]	15	+	95091434	BMPR1B	ENST00000502683.5	42	+	95091491	BMPR1B	ENST00000264568.8
H929	28255	chr16	75556407	0	0	PROMOTER	5.59697	chr16:75556282-75556532	chr16	75556282	75556532	[5.59697]	15	+	75556392	RP11-490B18.5	ENST00000621911.1	121	-	75556286	TMEM231	ENST00000258173.10	167	-	75556240	TMEM231	ENST00000565067.5	169	-	75556238	TMEM231	ENST00000568377.5
H929	28716	chr17	28720229	0	0	PROMOTER	5.42563	chr17:28720104-28720354	chr17	28720104	28720354	[5.42563]	15	+	28720244	RPL23A	ENST00000394938.8	150	+	28720079	RPL23A	ENST00000496182.5	321	+	28720550	SNORD42B	ENST00000458893.1	340	+	28720569	RPL23A	ENST00000472628.1	836	+	28719393	RPL23A	ENST00000422514.6	1814	-	28718415	RAB34	ENST00000301043.10	1961	-	28718268	RAB34	ENST00000453384.7
H929	6104	chr2	219229645	2.45	5	PROMOTER	207.65	chr2:219229520-219229770	chr2	219229520	219229770	[98.62015, 207.65]	16	-	219229629	ATG9A	ENST00000409422.5	25	-	219229670	ATG9A	ENST00000361242.8	72	-	219229717	ATG9A	ENST00000396761.6	112	+	219229757	ANKZF1	ENST00000323348.9	142	+	219229787	ANKZF1	ENST00000409849.5	243	+	219229888	ANKZF1	ENST00000410034.7	277	-	219229368	ATG9A	ENST00000409618.5
H929	3785	chr2	6877649	39.71	90	PROMOTER	16.6987	chr2:6877524-6877774	chr2	6877524	6877774	[4.38, 16.69874, 2.4]	16	+	6877665	RSAD2	ENST00000382040.3
H929	29013	chr17	51153552	3	6	PROMOTER	13.5337	chr17:51153427-51153677	chr17	51153427	51153677	[11.19, 13.53375]	16	+	51153536	NME1	ENST00000393196.7	24	+	51153576	NME1	ENST00000336097.7	26	+	51153578	NME1	ENST00000480143.5	29	+	51153581	NME1	ENST00000511355.5	38	+	51153590	NME1-NME2	ENST00000393193.6	52	+	51153604	NME1-NME2	ENST00000376392.10	84	+	51153636	NME1-NME2	ENST00000555572.1	113	+
H929	30878	chr19	40750508	2	4	PROMOTER	13.2967	chr19:40750383-40750633	chr19	40750383	40750633	[13.29674, 6.77]	16	-	40750492	C19orf54	ENST00000470681.5	206	-	40750302	C19orf54	ENST00000598485.6	351	+	40750859	SNRPA	ENST00000243563.7	585	-	40749923	C19orf54	ENST00000378313.6
H929	4467	chr2	63588942	5.48	11	PROMOTER	12.4788	chr2:63588817-63589067	chr2	63588817	63589067	[12.47883, 9.57]	16	+	63588958	MDH1	ENST00000409908.5	31	+	63588973	MDH1	ENST00000409476.5	143	-	63588799	WDPCP	ENST00000272321.11	209	+	63589151	MDH1	ENST00000539945.5:ENST00000544381.3	333	+	63588609	MDH1	ENST00000233114.12	424	-	63588518	WDPCP	ENST00000409562.7
H929	25458	chr12	120686853	0	0	PROMOTER	8.02646	chr12:120686728-120686978	chr12	120686728	120686978	[8.02646]	16	+	120686869	MLEC	ENST00000228506.7	392	+	120687245	MLEC	ENST00000412616.2
H929	28257	chr16	75623284	0	0	PROMOTER	7.99629	chr16:75623159-75623409	chr16	75623159	75623409	[7.99629]	16	-	75623300	ADAT1	ENST00000307921.7
H929	31967	chr21	25607533	0	0	PROMOTER	7.40815	chr21:25607408-25607658	chr21	25607408	25607658	[7.40815]	16	-	25607517	MRPL39	ENST00000307301.11:ENST00000352957.8
H929	13697	chr5	173144458	0	1	PROMOTER	6.80918	chr5:173144333-173144583	chr5	173144333	173144583	[5.96, 6.80918]	16	+	173144442	BNIP1	ENST00000231668.13	57	+	173144515	BNIP1	ENST00000351486.9	79	+	173144537	BNIP1	ENST00000352523.10	88	+	173144546	BNIP1	ENST00000393770.4	581	-	173145039	CTC-209H22.3	ENST00000521251.1
H929	26407	chr14	81398567	110.5	221	PROMOTER	6.72893	chr14:81398442-81398692	chr14	81398442	81398692	[5.34262, 6.72893]	16	-	81398583	STON2	ENST00000614646.4:ENST00000267540.2
H929	29310	chr17	75110003	0	0	PROMOTER	6.34921	chr17:75109878-75110128	chr17	75109878	75110128	[6.34921]	16	+	75109987	ARMC7	ENST00000245543.5	25	+	75109978	ARMC7	ENST00000582136.5	51	+	75109952	ARMC7	ENST00000581078.1	178	+	75110181	ARMC7	ENST00000584947.1
H929	8263	chr3	170870467	0	0	PROMOTER	6.34921	chr3:170870342-170870592	chr3	170870342	170870592	[6.34921]	16	-	170870483	RPL22L1	ENST00000295830.12	272	-	170870195	RPL22L1	ENST00000463836.1
H929	24415	chr12	6924479	0	0	PROMOTER	5.44426	chr12:6924354-6924604	chr12	6924354	6924604	[5.44426]	16	+	6924463	ATN1	ENST00000356654.8
H929	14516	chr6	35468392	0	0	PROMOTER	5.07554	chr6:35468267-35468517	chr6	35468267	35468517	[5.07554]	16	+	35468408	RPL10A	ENST00000322203.6
H929	9459	chr4	89901999	3.46	7	PROMOTER	5.06748	chr4:89901874-89902124	chr4	89901874	89902124	[5.06748, 1.62]	16	+	89901983	MMRN1	ENST00000508372.1
H929	21020	chr10	7471959	41.88	95	PROMOTER	23.9987	chr10:7471834-7472084	chr10	7471834	7472084	[3.63, 23.99867, 7.04]	17	-	7471942	RP5-1031D4.2	ENST00000420395.1
H929	22703	chr11	47426249	0	0	PROMOTER	7.18052	chr11:47426124-47426374	chr11	47426124	47426374	[7.18052]	17	-	47426266	PSMC3	ENST00000602866.5	188	-	47426437	PSMC3	ENST00000298852.7	193	-	47426442	PSMC3	ENST00000530912.5	224	-	47426473	PSMC3	ENST00000619920.4
H929	8068	chr3	152268930	0	0	PROMOTER	6.73299	chr3:152268805-152269055	chr3	152268805	152269055	[6.73299]	17	+	152268947	MBNL1	ENST00000493459.5	33	+	152268963	MBNL1	ENST00000324210.9	462	+	152268468	MBNL1	ENST00000355460.6	625	-	152269555	MBNL1-AS1	ENST00000608395.1	890	+	152268040	MBNL1	ENST00000282486.10:ENST00000282488.11
H929	582	chr1	45521973	0	0	PROMOTER	6.46795	chr1:45521848-45522098	chr1	45521848	45522098	[6.46795]	17	-	45521956	PRDX1	ENST00000319248.12	35	-	45521938	PRDX1	ENST00000262746.5	119	-	45521854	PRDX1	ENST00000372079.1
H929	1820	chr1	160739308	0	0	PROMOTER	5.59278	chr1:160739183-160739433	chr1	160739183	160739433	[5.59278]	17	+	160739291	SLAMF7	ENST00000359331.8	40	+	160739268	SLAMF7	ENST00000368042.7	43	+	160739265	SLAMF7	ENST00000368043.7	251	+	160739057	SLAMF7	ENST00000441662.6:ENST00000444090.6:ENST00000458104.6:ENST00000458602.6:ENST00000621377.4
H929	6158	chr2	223957422	1.41	3	PROMOTER	51.241	chr2:223957297-223957547	chr2	223957297	223957547	[51.24102, 22.97]	18	+	223957404	MRPL44	ENST00000258383.3
H929	26322	chr14	72926359	6	12	PROMOTER	19.2546	chr14:72926234-72926484	chr14	72926234	72926484	[19.25464, 9.66]	18	+	72926377	DCAF4	ENST00000353777.7	27	+	72926332	DCAF4	ENST00000358377.6	119	+	72926478	DCAF4	ENST00000394234.6	121	+	72926480	DCAF4	ENST00000509153.5	128	+	72926487	DCAF4	ENST00000555042.5
H929	13023	chr5	141326192	1	2	PROMOTER	17.9753	chr5:141326067-141326317	chr5	141326067	141326317	[17.97534, 4.38]	18	+	141326210	AC005618.6	ENST00000606901.1	48	+	141326240	AC005618.6	ENST00000606674.1
H929	25445	chr12	120291921	6	12	PROMOTER	13.2673	chr12:120291796-120292046	chr12	120291796	120292046	[7.37, 13.26732]	18	-	120291903	RNU4-2	ENST00000365668.1	1316	-	120293237	RNU4-1	ENST00000363925.1
H929	27215	chr15	67542622	9	18	PROMOTER	10.9609	chr15:67542497-67542747	chr15	67542497	67542747	[7.25, 10.96088]	18	-	67542604	RP11-502I4.3	ENST00000604760.1	87	+	67542709	MAP2K5	ENST00000178640.9	709	+	67543331	MAP2K5	ENST00000395476.6
H929	5635	chr2	183124373	0	0	PROMOTER	8.37312	chr2:183124248-183124498	chr2	183124248	183124498	[4.26, 8.37312]	18	+	183124355	NUP35	ENST00000295119.8
H929	25220	chr12	103957233	8	16	PROMOTER	8.23	chr12:103957108-103957358	chr12	103957108	103957358	[7.98565, 8.23]	18	-	103957215	C12orf73	ENST00000546819.1	20	-	103957213	C12orf73	ENST00000546540.1	31	-	103957264	C12orf73	ENST00000378090.8	40	-	103957273	C12orf73	ENST00000547945.5	43	-	103957190	C12orf73	ENST00000549478.1	52	-	103957181	C12orf73	ENST00000547975.5	86	-	103957147	C12orf73	ENST00000552940.1
H929	21433	chr10	43407837	0	0	PROMOTER	6.97102	chr10:43407712-43407962	chr10	43407712	43407962	[6.97102]	18	-	43407819	HNRNPF	ENST00000357065.8	1045	-	43408882	HNRNPF	ENST00000356053.7	1329	-	43409166	HNRNPF	ENST00000337970.7
H929	30883	chr19	41264349	0	0	PROMOTER	6.31426	chr19:41264224-41264474	chr19	41264224	41264474	[6.31426]	18	+	41264331	HNRNPUL1	ENST00000392006.7	23	+	41264372	HNRNPUL1	ENST00000378215.8	73	+	41264422	HNRNPUL1	ENST00000617774.1	102	+	41264451	HNRNPUL1	ENST00000602130.5	109	+	41264458	HNRNPUL1	ENST00000617305.4	730	+	41265079	HNRNPUL1	ENST00000593587.5	773	+	41265122	HNRNPUL1	ENST00000263367.7	1830	+
H929	30859	chr19	39412567	4.47	9	PROMOTER	5.92925	chr19:39412442-39412692	chr19	39412442	39412692	[5.92925, 1.37]	18	+	39412585	PLEKHG2	ENST00000425673.5	742	+	39413309	PLEKHG2	ENST00000458508.6	1098	+	39413665	PLEKHG2	ENST00000409797.6
H929	4059	chr2	27663871	2.45	5	PROMOTER	5.67647	chr2:27663746-27663996	chr2	27663746	27663996	[5.67647, 4.76]	18	+	27663889	SLC4A1AP	ENST00000618046.4	31	-	27663840	SUPT7L	ENST00000404798.6	62	-	27663809	SUPT7L	ENST00000337768.9	231	-	27663640	SUPT7L	ENST00000406540.5	232	-	27663639	SUPT7L	ENST00000405491.5:ENST00000464789.2	400	+	27663471	SLC4A1AP	ENST00000326019.10:ENST00000613058.4
H929	22056	chr10	113679958	0	0	PROMOTER	5.6153	chr10:113679833-113680083	chr10	113679833	113680083	[5.6153]	18	+	113679940	CASP7	ENST00000369315.5	81	+	113679877	CASP7	ENST00000369318.7	289	+	113679669	CASP7	ENST00000345633.8:ENST00000369321.6:ENST00000614447.4	754	+	113679204	CASP7	ENST00000369331.8	796	+	113679162	CASP7	ENST00000621345.4
H929	31059	chr19	49474210	0	0	PROMOTER	5.06753	chr19:49474085-49474335	chr19	49474085	49474335	[5.06753]	18	+	49474228	FLT3LG	ENST00000596435.5	24	+	49474234	FLT3LG	ENST00000597551.5	26	+	49474236	FLT3LG	ENST00000204637.6	42	+	49474252	FLT3LG	ENST00000600429.5	351	+	49474561	FLT3LG	ENST00000594009.5	376	+	49474586	CTD-3148I10.15	ENST00000595815.1	392	+	49474602	FLT3LG	ENST00000595510.1
H929	26839	chr15	29821529	2	4	PROMOTER	35.3878	chr15:29821404-29821654	chr15	29821404	29821654	[11.48, 35.38783]	19	-	29821548	TJP1	ENST00000400011.6	499	-	29822028	TJP1	ENST00000356107.10:ENST00000545208.6	973	-	29822502	TJP1	ENST00000495972.6	974	-	29822503	TJP1	ENST00000346128.10:ENST00000614355.4	1102	+	29822631	RP11-680F8.3	ENST00000557989.1
H929	1394	chr1	151190232	1	2	PROMOTER	35.1647	chr1:151190107-151190357	chr1	151190107	151190357	[26.66, 35.16465]	19	-	151190213	VPS72	ENST00000640458.1
H929	23697	chr11	113773830	0	1	PROMOTER	26.4336	chr11:113773705-113773955	chr11	113773705	113773955	[26.43356, 11.17]	19	-	113773811	ZW10	ENST00000200135.7
H929	29881	chr18	50375014	0	0	PROMOTER	19.4935	chr18:50374889-50375139	chr18	50374889	50375139	[19.49354]	19	+	50374995	SKA1	ENST00000285116.7	26	+	50375040	SKA1	ENST00000398452.6	29	+	50375043	SKA1	ENST00000417656.6	32	+	50375046	SKA1	ENST00000488454.5
H929	24596	chr12	34022449	1.41	3	PROMOTER	15.4783	chr12:34022324-34022574	chr12	34022324	34022574	[5.58, 15.47831]	19	+	34022468	ALG10	ENST00000538927.1	168	+	34022281	ALG10	ENST00000266483.6
H929	1842	chr1	161069926	0	0	PROMOTER	11.8749	chr1:161069801-161070051	chr1	161069801	161070051	[11.87491]	19	-	161069945	ARHGAP30	ENST00000368013.7	44	-	161069970	ARHGAP30	ENST00000368015.1	260	-	161069666	ARHGAP30	ENST00000368016.7
H929	17114	chr7	128940691	5	10	PROMOTER	11.5701	chr7:128940566-128940816	chr7	128940566	128940816	[9.65, 11.57006]	19	+	128940672	IRF5	ENST00000473745.5	147	+	128940838	IRF5	ENST00000619830.1
H929	23843	chr11	118566095	5.48	11	PROMOTER	10.2164	chr11:118565970-118566220	chr11	118565970	118566220	[5.63, 10.21642]	19	-	118566076	IFT46	ENST00000264021.7	60	-	118566035	IFT46	ENST00000264020.6	178	-	118565917	IFT46	ENST00000530872.5
H929	1656	chr1	157552501	0	0	PROMOTER	9.39193	chr1:157552376-157552626	chr1	157552376	157552626	[9.39193]	19	-	157552520	FCRL5	ENST00000361835.7	46	-	157552455	FCRL5	ENST00000368190.7:ENST00000368189.3
H929	28899	chr17	43006759	0	0	PROMOTER	8.10232	chr17:43006634-43006884	chr17	43006634	43006884	[8.10232]	19	+	43006740	IFI35	ENST00000438323.2	34	+	43006725	IFI35	ENST00000415816.6
H929	21485	chr10	66926025	4.47	9	PROMOTER	7.97	chr10:66925900-66926150	chr10	66925900	66926150	[7.97, 3.11]	19	+	66926006	LRRTM3	ENST00000361320.4
H929	5121	chr2	135985157	0	0	PROMOTER	7.88152	chr2:135985032-135985282	chr2	135985032	135985282	[7.88152]	19	+	135985176	AC093391.2	ENST00000419808.5	62	+	135985219	AC093391.2	ENST00000438432.5	177	+	135985334	AC093391.2	ENST00000444406.1	317	+	135985474	AC093391.2	ENST00000446492.1	527	-	135985684	DARS	ENST00000264161.8
H929	20230	chr9	76441685	3.46	7	PROMOTER	7.48215	chr9:76441560-76441810	chr9	76441560	76441810	[7.48215, 1.38]	19	+	76441666	GCNT1	ENST00000442371.5
H929	17847	chr8	33567106	2.45	5	PROMOTER	7.39369	chr8:33566981-33567231	chr8	33566981	33567231	[7.39369, 6.01]	19	-	33567125	RNF122	ENST00000256257.1
H929	20900	chr9	137086908	0	0	PROMOTER	7.34293	chr9:137086783-137087033	chr9	137086783	137087033	[7.34293]	19	+	137086927	MAN1B1	ENST00000371589.8	91	-	137086817	MAN1B1-AS1	ENST00000596585.3	172	+	137087080	MAN1B1	ENST00000535144.5
H929	25319	chr12	109999108	6.48	13	PROMOTER	6.86854	chr12:109998983-109999233	chr12	109998983	109999233	[3.85, 6.86854]	19	-	109999127	RP11-837J7.3	ENST00000624844.1	415	+	109999523	ANKRD13A	ENST00000261739.8
H929	22863	chr11	66002209	0	0	PROMOTER	6.84445	chr11:66002084-66002334	chr11	66002084	66002334	[6.84445]	19	+	66002228	BANF1	ENST00000445560.6	33	-	66002176	EIF1AD	ENST00000527249.5	43	-	66002166	EIF1AD	ENST00000529964.5	48	-	66002161	EIF1AD	ENST00000525767.5	52	-	66002157	EIF1AD	ENST00000312234.6	53	-	66002156	EIF1AD	ENST00000526451.5	55	-	66002154	EIF1AD	ENST00000533544.5	130	+
H929	8631	chr4	6709899	0	0	PROMOTER	6.50139	chr4:6709774-6710024	chr4	6709774	6710024	[6.50139]	19	-	6709880	MRFAP1L1	ENST00000320848.6
H929	16817	chr7	100102080	0	0	PROMOTER	6.06904	chr7:100101955-100102205	chr7	100101955	100102205	[6.06904]	19	+	100102061	AP4M1	ENST00000422582.5	140	-	100101940	MCM7	ENST00000621318.4:ENST00000343023.10:ENST00000303887.9	416	+	100101664	AP4M1	ENST00000421755.5	523	+	100101557	AP4M1	ENST00000429084.5:ENST00000359593.8	1300	-	100100780	MCM7	ENST00000354230.7
H929	17722	chr8	28093093	0	0	PROMOTER	5.78149	chr8:28092968-28093218	chr8	28092968	28093218	[5.78149]	19	+	28093112	ELP3	ENST00000524103.5	26	+	28093067	ELP3	ENST00000380353.8:ENST00000537665.2	255	+	28092838	ELP3	ENST00000256398.12
H929	28577	chr17	8383145	5	10	PROMOTER	5.45	chr17:8383020-8383270	chr17	8383020	8383270	[5.45, 5.17678]	19	-	8383164	RPL26	ENST00000584164.6	21	-	8383166	RPL26	ENST00000582556.5	42	-	8383187	RP11-849F2.7	ENST00000582471.1	48	-	8383193	RPL26	ENST00000578812.5	68	-	8383213	RPL26	ENST00000583011.6	105	-	8383250	RPL26	ENST00000293842.10
H929	12176	chr5	96807929	9	18	PROMOTER	28.6925	chr5:96807804-96808054	chr5	96807804	96808054	[28.69245, 13.91]	20	-	96807909	ERAP1	ENST00000443439.6	171	-	96808100	ERAP1	ENST00000296754.7
H929	994	chr1	110631494	1	2	PROMOTER	20.9745	chr1:110631369-110631619	chr1	110631369	110631619	[20.97452, 8.19]	20	-	110631474	KCNA2	ENST00000369770.7
H929	14459	chr6	32255358	58.38	133	PROMOTER	17.5074	chr6:32255233-32255483	chr6	32255233	32255483	[7.51, 17.50744, 8.12]	20	+	32255338	HCG23	ENST00000647036.1	717	+	32254641	HCG23	ENST00000645563.1
H929	28549	chr17	7584052	0	0	PROMOTER	7.44545	chr17:7583927-7584177	chr17	7583927	7584177	[7.44545]	20	-	7584072	AC113189.5	ENST00000415124.1	199	+	7583853	MPDU1	ENST00000423172.6	224	+	7583828	MPDU1	ENST00000396501.8	405	+	7583647	MPDU1	ENST00000250124.10	523	+	7583529	MPDU1	ENST00000582151.1	534	-	7583518	AC113189.5	ENST00000573187.1
H929	9342	chr4	83010751	0	0	PROMOTER	5.2146	chr4:83010626-83010876	chr4	83010626	83010876	[5.2146]	20	-	83010731	LIN54	ENST00000442461.6	42	-	83010709	LIN54	ENST00000506560.5	72	-	83010823	LIN54	ENST00000446851.6	78	-	83010829	LIN54	ENST00000340417.7
H929	335	chr1	27234495	113.18	244	PROMOTER	41.8496	chr1:27234370-27234620	chr1	27234370	27234620	[2.66672, 41.84963, 28.08]	21	+	27234516	WDTC1	ENST00000319394.7	143	-	27234352	RP11-40H20.4	ENST00000425205.1	173	+	27234668	WDTC1	ENST00000361771.7
H929	28638	chr17	16988308	58.48	126	PROMOTER	23.8501	chr17:16988183-16988433	chr17	16988183	16988433	[6.87, 23.85012, 3.77]	21	+	16988329	AC104024.2	ENST00000419151.2
H929	6960	chr3	47282556	5	10	PROMOTER	22.6403	chr3:47282431-47282681	chr3	47282431	47282681	[15.33, 22.64027]	21	-	47282577	KIF9	ENST00000452770.6	38	-	47282518	KIF9	ENST00000425853.5	210	-	47282766	KIF9	ENST00000432493.5	291	-	47282847	KIF9	ENST00000335044.6:ENST00000444589.6	358	-	47282198	KIF9	ENST00000425452.1	390	+	47282946	KLHL18	ENST00000232766.5	895	-	47283451	KIF9	ENST00000265529.7
H929	14216	chr6	25962823	2.45	5	PROMOTER	22.1516	chr6:25962698-25962948	chr6	25962698	25962948	[7.18, 22.1516]	21	+	25962802	TRIM38	ENST00000357085.4
H929	14915	chr6	79078257	6.48	13	PROMOTER	17.7607	chr6:79078132-79078382	chr6	79078132	79078382	[7.26, 17.76073]	21	-	79078236	PHIP	ENST00000275034.4
H929	14533	chr6	36594389	7	14	PROMOTER	17.0188	chr6:36594264-36594514	chr6	36594264	36594514	[8.71, 17.01876]	21	+	36594368	SRSF3	ENST00000373715.10	203	+	36594592	SRSF3	ENST00000620941.1
H929	22416	chr11	14520384	13.49	27	PROMOTER	15.4907	chr11:14520259-14520509	chr11	14520259	14520509	[10.4, 15.49068]	21	-	14520363	PSMA1	ENST00000530457.5	40	-	14520344	RP11-140L24.4	ENST00000555531.1	312	-	14520696	PSMA1	ENST00000396394.6
H929	596	chr1	47179229	12	24	PROMOTER	13.2967	chr1:47179104-47179354	chr1	47179104	47179354	[13.29674, 9.37]	21	+	47179250	RP1-18D14.4	ENST00000429328.2	42	-	47179271	RP1-18D14.3	ENST00000444042.2
H929	13718	chr5	173893030	0	0	PROMOTER	11.0013	chr5:173892905-173893155	chr5	173892905	173893155	[11.00125]	21	+	173893051	CPEB4	ENST00000522336.5	48	+	173893078	CPEB4	ENST00000517880.1
H929	14301	chr6	27146819	4	8	PROMOTER	9.70956	chr6:27146694-27146944	chr6	27146694	27146944	[6.75, 9.70956]	21	-	27146798	HIST1H2BK	ENST00000356950.1	310	+	27147129	HIST1H2AH	ENST00000377459.2	807	+	27147626	MIR3143	ENST00000584253.1
H929	31068	chr19	49929238	0	0	PROMOTER	8.58751	chr19:49929113-49929363	chr19	49929113	49929363	[8.58751]	21	+	49929217	ATF5	ENST00000600336.1	95	+	49929143	ATF5	ENST00000423777.6	205	-	49929443	NUP62	ENST00000597029.5	237	-	49929475	NUP62	ENST00000597723.5	266	-	49929504	NUP62	ENST00000596217.1	301	-	49929539	IL4I1	ENST00000341114.7:ENST00000595948.5	493	-	49929731	NUP62	ENST00000352066.7	506	-
H929	9014	chr4	41935099	10.49	21	PROMOTER	7.87189	chr4:41934974-41935224	chr4	41934974	41935224	[5.99, 7.87189]	21	+	41935120	TMEM33	ENST00000504986.5	30	+	41935129	TMEM33	ENST00000513702.5	53	+	41935152	TMEM33	ENST00000325094.9
H929	28817	chr17	36103611	0	0	PROMOTER	7.33568	chr17:36103486-36103736	chr17	36103486	36103736	[7.33568]	21	+	36103590	CCL4	ENST00000615863.1	216	+	36103827	CCL4	ENST00000621626.1
H929	18673	chr8	80171179	0	0	PROMOTER	5.01591	chr8:80171054-80171304	chr8	80171054	80171304	[5.01591]	21	-	80171200	TPD52	ENST00000519303.6	379	-	80171558	TPD52	ENST00000379096.9	480	-	80171659	TPD52	ENST00000518937.5
H929	19264	chr8	108248676	94.79	212	PROMOTER	39.2389	chr8:108248551-108248801	chr8	108248551	108248801	[6.02, 39.23892, 16.93]	22	-	108248698	EIF3E	ENST00000519030.5	89	-	108248765	EIF3E	ENST00000220849.9
H929	3858	chr2	11132792	0	1	PROMOTER	16.6427	chr2:11132667-11132917	chr2	11132667	11132917	[4.61, 16.64271]	22	-	11132770	AC062028.1	ENST00000447433.5	261	+	11133053	C2orf50	ENST00000381585.7	337	+	11133129	C2orf50	ENST00000405022.3	616	-	11132176	AC062028.1	ENST00000536743.5
H929	14868	chr6	73369682	7	14	PROMOTER	13.9046	chr6:73369557-73369807	chr6	73369557	73369807	[13.90462, 8.42]	22	+	73369704	RP11-398K22.14	ENST00000445350.2	110	-	73369792	OOEP	ENST00000370359.5
H929	27021	chr15	49155626	4.47	9	PROMOTER	13.16	chr15:49155501-49155751	chr15	49155501	49155751	[13.16004, 8.0]	22	-	49155604	COPS2	ENST00000542928.5	26	-	49155652	COPS2	ENST00000388901.9	35	-	49155661	COPS2	ENST00000299259.10	139	+	49155765	GALK2	ENST00000327171.7
H929	32408	chr22	39901060	5	10	PROMOTER	10.5701	chr22:39900935-39901185	chr22	39900935	39901185	[10.57006, 4.61]	22	+	39901082	GRAP2	ENST00000344138.8
H929	21532	chr10	73110437	4.47	9	PROMOTER	8.25481	chr10:73110312-73110562	chr10	73110312	73110562	[8.25481, 2.8]	22	+	73110459	NUDT13	ENST00000349051.9:ENST00000357321.8	62	+	73110375	NUDT13	ENST00000617744.4:ENST00000537969.5:ENST00000544879.5	93	+	73110530	NUDT13	ENST00000372997.3
H929	23858	chr11	119067799	0	1	PROMOTER	8.02646	chr11:119067674-119067924	chr11	119067674	119067924	[4.97, 8.02646]	22	+	119067821	VPS11	ENST00000614944.4	101	-	119067698	RP11-110I1.13	ENST00000607709.1	107	+	119067692	VPS11	ENST00000621676.4	1734	+	119069533	VPS11	ENST00000620429.4
H929	2917	chr1	203765154	5.48	11	PROMOTER	7.87189	chr1:203765029-203765279	chr1	203765029	203765279	[4.12, 7.87189]	22	+	203765176	LAX1	ENST00000442561.6	23	+	203765177	LAX1	ENST00000367217.5
H929	8411	chr3	184248993	0	0	PROMOTER	7.46411	chr3:184248868-184249118	chr3	184248868	184249118	[7.46411]	22	-	184248971	ALG3	ENST00000397676.7	527	-	184249520	ALG3	ENST00000455059.5	555	-	184249548	ALG3	ENST00000445626.6	657	+	184249650	EEF1AKMT4	ENST00000324557.8	702	+	184249695	EEF1AKMT4-ECE2	ENST00000402825.7
H929	5986	chr2	208025582	0	0	PROMOTER	7.14927	chr2:208025457-208025707	chr2	208025457	208025707	[7.14927]	22	-	208025560	PLEKHM3	ENST00000427836.7	84	-	208025498	PLEKHM3	ENST00000457206.1
H929	32010	chr21	32612564	0	0	PROMOTER	7.14927	chr21:32612439-32612689	chr21	32612439	32612689	[7.14927]	22	-	32612586	CFAP298	ENST00000382549.8	283	-	32612281	AP000275.65	ENST00000553001.1	302	-	32612866	CFAP298	ENST00000290155.7
H929	24686	chr12	48716741	0	0	PROMOTER	6.469	chr12:48716616-48716866	chr12	48716616	48716866	[6.469]	22	-	48716719	CCNT1	ENST00000640148.1	157	-	48716898	CCNT1	ENST00000261900.7	257	-	48716998	CCNT1	ENST00000618666.4
H929	27428	chr15	84980418	3	6	PROMOTER	5.6952	chr15:84980293-84980543	chr15	84980293	84980543	[5.6952, 4.71]	22	+	84980440	PDE8A	ENST00000310298.8	95	+	84980513	PDE8A	ENST00000557957.5	1556	+	84981974	PDE8A	ENST00000394553.5	1563	+	84981981	PDE8A	ENST00000339708.9
H929	14338	chr6	27893127	0	0	PROMOTER	5.638	chr6:27893002-27893252	chr6	27893002	27893252	[5.638]	22	-	27893149	HIST1H2AM	ENST00000359611.3	336	+	27893463	HIST1H2BO	ENST00000616182.1
H929	17265	chr7	141738280	6.48	13	PROMOTER	72.3948	chr7:141738155-141738405	chr7	141738155	141738405	[72.39475, 52.21]	23	-	141738257	RP5-894A10.5	ENST00000478332.5	41	+	141738321	SSBP1	ENST00000265304.10	50	-	141738230	RP5-894A10.5	ENST00000488785.5	54	+	141738334	SSBP1	ENST00000612337.4	78	+	141738358	SSBP1	ENST00000498107.5	120	+	141738400	SSBP1	ENST00000465582.5	320	+	141738600	SSBP1	ENST00000484178.5	327	+
H929	21718	chr10	89392523	7	14	PROMOTER	31.4309	chr10:89392398-89392648	chr10	89392398	89392648	[17.38, 31.43087]	23	+	89392546	IFIT1	ENST00000371804.3:ENST00000546318.2
H929	2671	chr1	184051628	2	4	PROMOTER	25.252	chr1:184051503-184051753	chr1	184051503	184051753	[25.25196, 4.38]	23	+	184051651	TSEN15	ENST00000423085.7:ENST00000645668.1	48	+	184051676	TSEN15	ENST00000361641.6	58	+	184051686	TSEN15	ENST00000643231.1	71	+	184051699	TSEN15	ENST00000533373.6	84	+	184051712	TSEN15	ENST00000647437.1	90	+	184051718	TSEN15	ENST00000647465.1
H929	30994	chr19	46788571	3.46	7	PROMOTER	18.5904	chr19:46788446-46788696	chr19	46788446	46788696	[6.61, 18.59035]	23	-	46788594	SLC1A5	ENST00000542575.6	756	+	46787815	CTB-147N14.6	ENST00000617006.1	1229	-	46787342	SLC1A5	ENST00000412532.6
H929	7293	chr3	79019482	2	4	PROMOTER	18.5466	chr3:79019357-79019607	chr3	79019357	79019607	[6.77, 18.54663]	23	-	79019459	ROBO1	ENST00000618833.4:ENST00000436010.6:ENST00000618846.4	467	-	79019015	ROBO1	ENST00000495273.5	938	-	79018544	ROBO1	ENST00000467549.5
H929	16029	chr7	19709064	0	0	PROMOTER	11.6488	chr7:19708939-19709189	chr7	19708939	19709189	[11.64881]	23	-	19709087	TWISTNB	ENST00000222567.5
H929	13918	chr6	5261503	0	0	PROMOTER	8.83508	chr6:5261378-5261628	chr6	5261378	5261628	[8.83508]	23	+	5261526	FARS2	ENST00000274680.8	459	+	5261044	FARS2	ENST00000324331.10	564	-	5260939	LYRM4	ENST00000330636.8	761	-	5260742	LYRM4	ENST00000468929.5:ENST00000480566.5	766	-	5260737	LYRM4	ENST00000500576.4	770	-	5260733	LYRM4	ENST00000464010.5
H929	30827	chr19	35742476	0	0	PROMOTER	8.64892	chr19:35742351-35742601	chr19	35742351	35742601	[8.64892]	23	-	35742453	IGFLR1	ENST00000588992.5	26	-	35742450	IGFLR1	ENST00000246532.5	29	-	35742447	IGFLR1	ENST00000592537.5	1141	-	35741335	IGFLR1	ENST00000592889.1
H929	31983	chr21	29024674	0	0	PROMOTER	8.58605	chr21:29024549-29024799	chr21	29024549	29024799	[8.58605]	23	+	29024651	USP16	ENST00000334352.8	45	+	29024629	USP16	ENST00000399975.7:ENST00000399976.6	216	-	29024890	RP1-100J12.1	ENST00000608809.1
H929	15983	chr6	170554310	0	1	PROMOTER	7.99629	chr6:170554185-170554435	chr6	170554185	170554435	[7.99629, 1.92]	23	+	170554333	TBP	ENST00000392092.6:ENST00000540980.5:ENST00000616883.4	69	+	170554379	TBP	ENST00000230354.10	969	-	170553341	PSMB1	ENST00000262193.6
H929	31002	chr19	47256546	4.47	9	PROMOTER	7.81	chr19:47256421-47256671	chr19	47256421	47256671	[7.81, 6.227]	23	+	47256523	CCDC9	ENST00000643617.1	87	+	47256459	CCDC9	ENST00000221922.10
H929	16199	chr7	29680851	3	6	PROMOTER	7.62232	chr7:29680726-29680976	chr7	29680726	29680976	[1.75, 7.62232]	23	-	29680828	MIR550A3	ENST00000390735.2
H929	5848	chr2	201071985	0	0	PROMOTER	7.49674	chr2:201071860-201072110	chr2	201071860	201072110	[7.49674]	23	+	201072008	NDUFB3	ENST00000433898.5	45	+	201072030	NDUFB3	ENST00000454214.1	246	+	201071739	NDUFB3	ENST00000237889.8	316	-	201071669	FAM126B	ENST00000418596.7
H929	14972	chr6	85678697	0	0	PROMOTER	7.02807	chr6:85678572-85678822	chr6	85678572	85678822	[7.02807]	23	-	85678720	SNHG5	ENST00000587692.5	36	-	85678733	SNHG5	ENST00000589187.5	39	-	85678736	SNHG5	ENST00000622963.3:ENST00000369605.8	261	-	85678436	SNHG5	ENST00000623910.3	284	-	85678413	SNHG5	ENST00000623001.3	292	-	85678405	SNHG5	ENST00000624295.3	462	-	85678235	SNHG5	ENST00000623901.3	1039	-
H929	13471	chr5	160421881	0	0	PROMOTER	5.10526	chr5:160421756-160422006	chr5	160421756	160422006	[5.10526]	23	+	160421904	PTTG1	ENST00000520452.5	29	+	160421910	PTTG1	ENST00000393964.1	59	+	160421822	PTTG1	ENST00000352433.9
H929	28480	chr17	2089705	5	10	PROMOTER	43.76	chr17:2089580-2089830	chr17	2089580	2089830	[25.09, 43.75997]	24	+	2089681	RP11-667K14.5	ENST00000571815.1
H929	2659	chr1	183590628	1.41	3	PROMOTER	37.7837	chr1:183590503-183590753	chr1	183590503	183590753	[37.78375, 12.52]	24	-	183590604	NCF2	ENST00000413720.5:ENST00000418089.5	47	-	183590581	NCF2	ENST00000367535.7	248	-	183590876	NCF2	ENST00000367536.5
H929	29401	chr17	82449702	3.46	7	PROMOTER	29.9564	chr17:82449577-82449827	chr17	82449577	82449827	[29.95643, 13.31]	24	-	82449726	CYBC1	ENST00000577732.5	97	-	82449605	CYBC1	ENST00000577436.5	1007	-	82450709	CYBC1	ENST00000437807.6	1015	-	82450717	CYBC1	ENST00000583617.5	1021	-	82450723	CYBC1	ENST00000578913.5	1026	-	82450728	CYBC1	ENST00000580560.5	1035	-	82450737	CYBC1	ENST00000584503.5	1068	-
H929	33195	chrX	147911927	1	2	PROMOTER	21.2143	chrX:147911802-147912052	chrX	147911802	147912052	[5.18, 21.21431]	24	+	147911951	FMR1	ENST00000621453.4:ENST00000218200.12:ENST00000370471.7:ENST00000440235.6	36	+	147911963	FMR1	ENST00000370477.5	37	+	147911964	FMR1	ENST00000621987.4	105	+	147911822	RF02118	ENST00000613724.1	110	-	147911817	FMR1-AS1	ENST00000594922.5:ENST00000596112.5	125	+	147912052	FMR1	ENST00000334557.10:ENST00000439526.6:ENST00000370475.8	191	+	147912118	FMR1	ENST00000616382.4	196	+
H929	15961	chr6	166999341	0	1	PROMOTER	19.4566	chr6:166999216-166999466	chr6	166999216	166999466	[19.45658, 5.65]	24	+	166999317	FGFR1OP	ENST00000622353.4	64	+	166999405	RP11-517H2.6	ENST00000609590.1	67	+	166999408	FGFR1OP	ENST00000349556.4	159	+	166999182	FGFR1OP	ENST00000366847.8	276	-	166999065	RP1-167A14.2	ENST00000444102.1	1429	-	166997912	MIR3939	ENST00000582614.1
H929	4797	chr2	99181162	1.41	3	PROMOTER	19.354	chr2:99181037-99181287	chr2	99181037	99181287	[8.02, 19.35397]	24	+	99181186	MRPL30	ENST00000409145.5	83	+	99181079	MRPL30	ENST00000338148.7	104	-	99181058	MITD1	ENST00000289359.6
H929	2463	chr1	175023449	0	0	PROMOTER	13.0544	chr1:175023324-175023574	chr1	175023324	175023574	[13.05445]	24	-	175023425	MRPS14	ENST00000476371.1	869	-	175022580	RF00019	ENST00000383932.1
H929	1491	chr1	153923361	1	2	PROMOTER	12.98	chr1:153923236-153923486	chr1	153923236	153923486	[10.49469, 12.98]	24	+	153923337	RP11-422P24.13	ENST00000641448.1	386	-	153922975	GATAD2B	ENST00000368655.4	619	-	153922742	GATAD2B	ENST00000634408.1	1331	-	153922030	GATAD2B	ENST00000634544.1
H929	13988	chr6	10412365	2	4	PROMOTER	11.2019	chr6:10412240-10412490	chr6	10412240	10412490	[6.2, 11.20188]	24	-	10412389	TFAP2A	ENST00000379608.8
H929	19775	chr9	2015162	6	12	PROMOTER	8.28656	chr9:2015037-2015287	chr9	2015037	2015287	[5.15, 8.28656]	24	+	2015186	SMARCA2	ENST00000357248.8	57	+	2015219	SMARCA2	ENST00000450198.6	119	+	2015281	SMARCA2	ENST00000637103.1	126	+	2015288	SMARCA2	ENST00000349721.7	185	+	2015347	SMARCA2	ENST00000636559.1	809	+	2015971	SMARCA2	ENST00000636903.1
H929	17341	chr7	150405418	0	0	PROMOTER	6.95283	chr7:150405293-150405543	chr7	150405293	150405543	[6.95283]	24	+	150405442	RP11-511P7.5	ENST00000641717.1	272	+	150405146	RP11-511P7.5	ENST00000498682.3	319	+	150405737	RP11-511P7.5	ENST00000642087.1
H929	27635	chr16	1782925	0	0	PROMOTER	6.9194	chr16:1782800-1783050	chr16	1782800	1783050	[6.9194]	24	+	1782901	NUBP2	ENST00000262302.13	65	+	1782990	NUBP2	ENST00000565987.5	82	+	1783007	NUBP2	ENST00000565134.5	105	-	1782820	SPSB3	ENST00000566339.5	1085	+	1784010	NUBP2	ENST00000568706.1	1409	-	1781516	SPSB3	ENST00000301717.8
H929	22860	chr11	65919359	0	0	PROMOTER	6.16874	chr11:65919234-65919484	chr11	65919234	65919484	[6.16874]	24	+	65919335	DRAP1	ENST00000376991.6	102	+	65919257	DRAP1	ENST00000312515.6	143	+	65919502	DRAP1	ENST00000527119.5	242	-	65919117	C11orf68	ENST00000438576.2	297	-	65919062	C11orf68	ENST00000449692.3	365	+	65919724	DRAP1	ENST00000532933.1	999	-	65918360	C11orf68	ENST00000530188.1
H929	22909	chr11	68903873	0	0	PROMOTER	5.51835	chr11:68903748-68903998	chr11	68903748	68903998	[5.51835]	24	+	68903897	IGHMBP2	ENST00000539224.1	31	+	68903842	IGHMBP2	ENST00000255078.7	53	-	68903820	MRPL21	ENST00000362034.6	87	-	68903786	MRPL21	ENST00000450904.6	95	-	68903778	MRPL21	ENST00000567045.5
H929	13223	chr5	150339283	0	0	PROMOTER	5.4381	chr5:150339158-150339408	chr5	150339158	150339408	[5.4381]	24	-	150339307	ARSI	ENST00000515301.2
H929	22351	chr11	8911115	0	0	PROMOTER	5.07554	chr11:8910990-8911240	chr11	8910990	8911240	[5.07554]	24	+	8911139	AKIP1	ENST00000299576.9	25	+	8911140	AKIP1	ENST00000309377.8	39	+	8911154	AKIP1	ENST00000309357.8	74	+	8911189	AKIP1	ENST00000529876.5	77	+	8911192	AKIP1	ENST00000525005.5	84	+	8911199	AKIP1	ENST00000534506.5	164	-	8910951	ST5	ENST00000534127.5	223	+
H929	24958	chr12	75511646	4.47	9	PROMOTER	16.5875	chr12:75511521-75511771	chr12	75511521	75511771	[11.62, 16.58752]	25	-	75511621	KRR1	ENST00000229214.8	49	-	75511597	KRR1	ENST00000438169.6
H929	16118	chr7	25180379	86.97	185	PROMOTER	11.1871	chr7:25180254-25180504	chr7	25180254	25180504	[11.18711, 3.88, 3.46695]	25	-	25180354	C7orf31	ENST00000409280.5	79	-	25180300	C7orf31	ENST00000283905.7
H929	1350	chr1	150236060	3	6	PROMOTER	9.39193	chr1:150235935-150236185	chr1	150235935	150236185	[9.39193, 8.31]	25	-	150236085	ANP32E	ENST00000369114.9	38	-	150236022	ANP32E	ENST00000436748.6	39	-	150236099	ANP32E	ENST00000369115.3	96	-	150236156	ANP32E	ENST00000583931.5:ENST00000629042.2	105	-	150235955	ANP32E	ENST00000533654.5	907	+	150236967	RNU2-17P	ENST00000410290.1	1382	-	150234678	ANP32E	ENST00000616917.4
H929	21569	chr10	76888188	2.45	5	PROMOTER	9.22241	chr10:76888063-76888313	chr10	76888063	76888313	[1.94, 9.22241]	25	+	76888213	RP11-443A13.5	ENST00000426234.5	126	+	76888062	RP11-443A13.5	ENST00000595702.1	144	+	76888044	RP11-443A13.5	ENST00000429850.2
H929	573	chr1	45011354	0	0	PROMOTER	8.25808	chr1:45011229-45011479	chr1	45011229	45011479	[8.25808]	25	-	45011329	HECTD3	ENST00000372172.4	793	+	45012147	UROD	ENST00000246337.8	853	+	45012207	UROD	ENST00000636293.1:ENST00000636836.1
H929	10262	chr4	174423820	0	0	PROMOTER	7.97	chr4:174423695-174423945	chr4	174423695	174423945	[7.97]	25	+	174423795	MIR4276	ENST00000584832.1
H929	1310	chr1	148679726	0	0	PROMOTER	7.49674	chr1:148679601-148679851	chr1	148679601	148679851	[7.49674]	25	-	148679751	NBPF14	ENST00000593495.2
H929	30593	chr19	9538652	0	0	PROMOTER	6.91979	chr19:9538527-9538777	chr19	9538527	9538777	[6.91979]	25	-	9538627	ZNF426	ENST00000253115.6	62	-	9538590	ZNF426	ENST00000593003.5	87	+	9538739	CTC-543D15.8	ENST00000619671.1	264	-	9538388	ZNF426	ENST00000589289.1
H929	27864	chr16	20764065	8	16	PROMOTER	6.75547	chr16:20763940-20764190	chr16	20763940	20764190	[3.11, 6.75547]	25	+	20764040	ACSM3	ENST00000440284.6	363	+	20763702	ACSM3	ENST00000289416.9
H929	31063	chr19	49580597	72.86	157	PROMOTER	6.469	chr19:49580472-49580722	chr19	49580472	49580722	[3.65, 5.98, 6.469]	25	-	49580572	NOSIP	ENST00000596358.5	39	-	49580558	NOSIP	ENST00000339093.7	729	+	49581326	PRRG2	ENST00000246794.9
H929	1575	chr1	156020984	0	0	PROMOTER	6.44108	chr1:156020859-156021109	chr1	156020859	156021109	[6.44108]	25	-	156020959	SSR2	ENST00000295702.8	51	-	156020933	SSR2	ENST00000496742.5	67	-	156020917	SSR2	ENST00000529008.5	95	-	156020889	SSR2	ENST00000480567.5
H929	26989	chr15	45201150	0	0	PROMOTER	5.67647	chr15:45201025-45201275	chr15	45201025	45201275	[5.67647]	25	-	45201175	SHF	ENST00000290894.12	518	-	45200632	CTD-2651B20.6	ENST00000563103.1
H929	14436	chr6	31399759	0	0	PROMOTER	5.07554	chr6:31399634-31399884	chr6	31399634	31399884	[5.07554]	25	+	31399784	MICA	ENST00000616296.4	943	+	31400702	HCP5	ENST00000414046.2
H929	14239	chr6	26189050	0	0	PROMOTER	13.5231	chr6:26188925-26189175	chr6	26188925	26189175	[13.52308]	26	-	26189076	HIST1H4D	ENST00000614247.1
H929	1509	chr1	154405167	0	0	PROMOTER	10.1862	chr1:154405042-154405292	chr1	154405042	154405292	[10.18623]	26	+	154405193	IL6R	ENST00000622330.4:ENST00000368485.7	56	+	154405223	IL6R	ENST00000344086.8	1397	-	154406564	RP11-350G8.5	ENST00000424435.1
H929	14351	chr6	28252250	2.45	5	PROMOTER	9.46222	chr6:28252125-28252375	chr6	28252125	28252375	[9.46222, 5.05]	26	-	28252224	ZKSCAN4	ENST00000377294.2
H929	697	chr1	59020392	8	16	PROMOTER	9.14245	chr1:59020267-59020517	chr1	59020267	59020517	[9.14245, 3.92]	26	+	59020366	RP4-794H19.4	ENST00000634569.1
H929	20802	chr9	125241637	2	4	PROMOTER	8.37543	chr9:125241512-125241762	chr9	125241512	125241762	[8.37543, 5.64]	26	+	125241663	RP11-65N13.8	ENST00000468244.1	307	-	125241330	HSPA5	ENST00000324460.6
H929	4	chr1	1013397	2.45	5	PROMOTER	7.39054	chr1:1013272-1013522	chr1	1013272	1013522	[7.39054, 5.83]	26	+	1013423	ISG15	ENST00000379389.4	204	-	1013193	RP11-54O7.11	ENST00000458555.1
H929	1466	chr1	153057563	0	0	PROMOTER	5.06748	chr1:153057438-153057688	chr1	153057438	153057688	[5.06748]	26	-	153057537	SPRR2A	ENST00000392653.2
H929	23632	chr11	111879153	0	0	PROMOTER	22.1345	chr11:111879028-111879278	chr11	111879028	111879278	[22.13446]	27	-	111879180	FDXACB1	ENST00000260257.8	71	+	111879224	C11orf1	ENST00000260276.7	218	+	111878935	C11orf1	ENST00000528125.5	272	-	111879425	RP11-108O10.8	ENST00000622211.4	389	+	111879542	C11orf1	ENST00000530214.5	1623	+	111880776	C11orf1	ENST00000529270.1
H929	29140	chr17	63600845	4	8	PROMOTER	20.3687	chr17:63600720-63600970	chr17	63600720	63600970	[17.18, 20.36871]	27	+	63600872	TACO1	ENST00000258975.6
H929	32349	chr22	36239616	0	1	PROMOTER	14.6015	chr22:36239491-36239741	chr22	36239491	36239741	[14.60152, 8.41]	27	-	36239643	APOL2	ENST00000358502.9	89	-	36239527	APOL2	ENST00000451256.6	338	-	36239954	APOL2	ENST00000249066.10
H929	26185	chr14	61751070	3.46	7	PROMOTER	12.2448	chr14:61750945-61751195	chr14	61750945	61751195	[12.24477, 4.07]	27	-	61751097	RP11-618G20.2	ENST00000554254.1
H929	9817	chr4	132124058	0	0	PROMOTER	11.8285	chr4:132123933-132124183	chr4	132123933	132124183	[7.71, 11.8285]	27	-	132124031	RP11-789C2.1	ENST00000420721.2
H929	17089	chr7	124929954	2	4	PROMOTER	10.6812	chr7:124929829-124930079	chr7	124929829	124930079	[4.06, 10.68116]	27	-	124929981	POT1	ENST00000357628.7	29	-	124929983	POT1	ENST00000393329.5	33	+	124929921	RP11-3B12.1	ENST00000453342.5	39	+	124929915	RP11-3B12.1	ENST00000449642.5	56	+	124929898	RP11-3B12.1	ENST00000435452.6
H929	23841	chr11	118359617	0	0	PROMOTER	9.99875	chr11:118359492-118359742	chr11	118359492	118359742	[9.99875]	27	+	118359644	UBE4A	ENST00000431736.6	32	+	118359585	UBE4A	ENST00000252108.7
H929	27663	chr16	4273048	0	0	PROMOTER	7.27016	chr16:4272923-4273173	chr16	4272923	4273173	[7.27016]	27	-	4273075	TFAP4	ENST00000204517.10
H929	923	chr1	93079208	3.46	7	PROMOTER	6.95283	chr1:93079083-93079333	chr1	93079083	93079333	[6.95283, 3.67]	27	+	93079235	MTF2	ENST00000540243.5:ENST00000545708.5	30	+	93079238	MTF2	ENST00000370298.8	103	+	93079311	MTF2	ENST00000370303.4
H929	29148	chr17	63842701	0	0	PROMOTER	6.85038	chr17:63842576-63842826	chr17	63842576	63842826	[6.85038]	27	-	63842674	SMARCD2	ENST00000613943.4	235	-	63842466	SMARCD2	ENST00000225742.13	239	-	63842940	SMARCD2	ENST00000448276.6
H929	1031	chr1	112707461	0	0	PROMOTER	6.75547	chr1:112707336-112707586	chr1	112707336	112707586	[6.75547]	27	-	112707434	RHOC	ENST00000369642.7	58	-	112707403	RHOC	ENST00000339083.11	326	-	112707135	RHOC	ENST00000369638.6	334	-	112707127	RHOC	ENST00000285735.6	336	-	112707125	RHOC	ENST00000369637.5	341	-	112707120	RHOC	ENST00000369636.6	382	-	112707079	RHOC	ENST00000369632.6	405	-
H929	25962	chr14	24094026	1.41	3	PROMOTER	5.79067	chr14:24093901-24094151	chr14	24093901	24094151	[3.91, 5.79067]	27	+	24094053	PCK2	ENST00000559250.5	112	+	24094138	PCK2	ENST00000216780.8	133	+	24094159	PCK2	ENST00000396973.8	275	+	24094301	PCK2	ENST00000545054.6	285	+	24094311	PCK2	ENST00000561286.5	351	+	24094377	PCK2	ENST00000558096.5	1104	-	24095130	NRL	ENST00000396997.1
H929	25713	chr13	41194593	0	0	PROMOTER	5.68548	chr13:41194468-41194718	chr13	41194468	41194718	[5.68548]	27	-	41194566	KBTBD7	ENST00000379483.3
H929	16745	chr7	92245887	0	0	PROMOTER	5.18669	chr7:92245762-92246012	chr7	92245762	92246012	[5.18669]	27	-	92245914	KRIT1	ENST00000394503.6	36	-	92245923	KRIT1	ENST00000394505.6	92	-	92245795	KRIT1	ENST00000412043.6	213	-	92246100	KRIT1	ENST00000394507.5:ENST00000340022.6	347	+	92246234	ANKIB1	ENST00000265742.7
H929	30976	chr19	45691889	4	8	PROMOTER	13.0191	chr19:45691764-45692014	chr19	45691764	45692014	[13.01905, 9.36]	28	-	45691917	SNRPD2	ENST00000585392.2:ENST00000590212.1	51	-	45691940	SNRPD2	ENST00000587367.5	52	-	45691941	SNRPD2	ENST00000391932.7	118	-	45691771	SNRPD2	ENST00000588599.5	427	-	45692316	SNRPD2	ENST00000588301.5	444	-	45692333	SNRPD2	ENST00000342669.7	594	+	45692483	QPCTL	ENST00000012049.9	808	+
H929	4014	chr2	24076415	0	1	PROMOTER	12.9385	chr2:24076290-24076540	chr2	24076290	24076540	[5.03, 12.9385]	28	-	24076443	SF3B6	ENST00000233468.4	467	+	24076882	FAM228B	ENST00000613899.4
H929	2083	chr1	165768957	24	48	PROMOTER	10.99	chr1:165768832-165769082	chr1	165768832	165769082	[10.99, 8.57326]	28	+	165768929	RP11-466F5.8	ENST00000423121.1	35	-	165768922	TMCO1	ENST00000612311.4:ENST00000628579.1	55	-	165768902	TMCO1	ENST00000392129.10	81	-	165768876	TMCO1	ENST00000464650.5	223	-	165769180	TMCO1	ENST00000367881.9
H929	32738	chrX	30577872	1	2	PROMOTER	9.39193	chrX:30577747-30577997	chrX	30577747	30577997	[4.05, 9.39193]	28	-	30577844	CXorf21	ENST00000378962.3
H929	3287	chr1	220089881	5.48	11	PROMOTER	6.44607	chr1:220089756-220090006	chr1	220089756	220090006	[6.44607, 1.39]	28	-	220089853	BPNT1	ENST00000322067.11:ENST00000414869.6:ENST00000544404.5	109	-	220089772	BPNT1	ENST00000354807.7	581	-	220090462	BPNT1	ENST00000469520.6
H929	17589	chr8	19013714	8	16	PROMOTER	6.44607	chr8:19013589-19013839	chr8	19013589	19013839	[1.12, 6.44607]	28	-	19013686	PSD3	ENST00000327040.12:ENST00000440756.4
H929	8377	chr3	180602165	6	12	PROMOTER	5.65	chr3:180602040-180602290	chr3	180602040	180602290	[4.89675, 5.65]	28	+	180602193	TTC14	ENST00000412756.6	35	+	180602130	TTC14	ENST00000296015.8	46	+	180602211	TTC14	ENST00000382584.8	230	-	180601935	RP11-496B10.3	ENST00000472596.1
H929	32858	chrX	73850596	0	0	PROMOTER	5.59729	chrX:73850471-73850721	chrX	73850471	73850721	[5.59729]	28	-	73850624	XIST	ENST00000635841.1	109	+	73850487	RF01880	ENST00000618930.1	495	-	73851091	XIST	ENST00000434839.2
H929	25465	chr12	121039128	0	0	PROMOTER	5.20867	chr12:121039003-121039253	chr12	121039003	121039253	[5.20867]	28	-	121039156	OASL	ENST00000339275.9	114	-	121039242	OASL	ENST00000257570.9:ENST00000620239.4
H929	21601	chr10	79285482	4	8	PROMOTER	33.3493	chr10:79285357-79285607	chr10	79285357	79285607	[33.34927, 23.97]	29	+	79285453	ZMIZ1	ENST00000446377.3
H929	22826	chr11	65096130	0	0	PROMOTER	24.1472	chr11:65096005-65096255	chr11	65096005	65096255	[24.14716]	29	+	65096159	VPS51	ENST00000279281.7	121	+	65096251	VPS51	ENST00000639871.1
H929	13778	chr5	176389004	7.48	15	PROMOTER	20.6382	chr5:176388879-176389129	chr5	176388879	176389129	[20.63825, 10.99]	29	-	176388975	NOP16	ENST00000614830.4	77	-	176388927	NOP16	ENST00000618911.4	242	-	176388762	NOP16	ENST00000619979.4:ENST00000621444.4	257	+	176388747	HIGD2A	ENST00000274787.2	429	-	176388575	NOP16	ENST00000616685.1	436	-	176388568	NOP16	ENST00000509257.1
H929	8430	chr3	186570289	3	6	PROMOTER	20.0302	chr3:186570164-186570414	chr3	186570164	186570414	[20.03025, 12.42]	29	-	186570318	TBCCD1	ENST00000446782.5	254	-	186570543	TBCCD1	ENST00000424280.5	389	+	186570678	DNAJB11	ENST00000265028.7
H929	32251	chr22	28741771	0	0	PROMOTER	14.1709	chr22:28741646-28741896	chr22	28741646	28741896	[14.17091]	29	-	28741800	CHEK2	ENST00000405598.5	63	-	28741834	CHEK2	ENST00000348295.7:ENST00000382565.5	67	-	28741838	CHEK2	ENST00000382580.6	73	-	28741844	CHEK2	ENST00000328354.10	260	+	28742031	HSCB	ENST00000216027.7	284	+	28742055	HSCB	ENST00000398941.6
H929	9075	chr4	52713668	0	0	PROMOTER	10.6327	chr4:52713543-52713793	chr4	52713543	52713793	[10.63268]	29	+	52713639	DANCR	ENST00000623036.1	419	+	52713249	SNORA26	ENST00000391286.1	844	+	52712824	DANCR	ENST00000444958.1	986	+	52712682	MIR4449	ENST00000578365.1	1264	+	52712404	DANCR	ENST00000411630.6
H929	20684	chr9	114611235	0	0	PROMOTER	10.1487	chr9:114611110-114611360	chr9	114611110	114611360	[10.14867]	29	+	114611206	TMEM268	ENST00000288502.8:ENST00000374049.4
H929	9796	chr4	128809652	0	0	PROMOTER	8.58605	chr4:128809527-128809777	chr4	128809527	128809777	[8.58605]	29	+	128809623	JADE1	ENST00000226319.10	51	+	128809703	JADE1	ENST00000511647.5	163	+	128809815	JADE1	ENST00000452328.6	267	+	128809919	JADE1	ENST00000512960.5	1618	+	128811270	JADE1	ENST00000610919.4	1674	+	128811326	JADE1	ENST00000413543.6
H929	32104	chr21	41167772	2.45	5	PROMOTER	7.55368	chr21:41167647-41167897	chr21	41167647	41167897	[2.67, 7.55368]	29	+	41167801	BACE2	ENST00000328735.10:ENST00000330333.10:ENST00000347667.5	215	+	41167557	MIR3197	ENST00000582241.1
H929	8953	chr4	39458978	8.49	17	PROMOTER	7.26	chr4:39458853-39459103	chr4	39458853	39459103	[2.27718, 7.26]	29	-	39458949	RPL9	ENST00000645496.1	30	-	39458948	RPL9	ENST00000295955.13	58	-	39458920	RPL9	ENST00000508595.6	67	+	39459045	LIAS	ENST00000509519.5	80	+	39459058	LIAS	ENST00000424936.6	84	-	39458894	RPL9	ENST00000503277.6	85	+	39459063	LIAS	ENST00000381846.2	88	+
H929	29099	chr17	59619903	0	0	PROMOTER	6.469	chr17:59619778-59620028	chr17	59619778	59620028	[6.469]	29	+	59619932	CLTC	ENST00000579456.5	45	+	59619858	CLTC	ENST00000393043.5:ENST00000269122.7	189	-	59619714	RP11-758H9.2	ENST00000611877.1	214	+	59619689	CLTC	ENST00000621829.4
H929	24046	chr11	125063037	1	2	PROMOTER	32.1	chr11:125062912-125063162	chr11	125062912	125063162	[31.54838, 32.1]	30	+	125063067	SLC37A2	ENST00000403796.6	299	+	125063336	SLC37A2	ENST00000308074.4
H929	23443	chr11	105045346	7	14	PROMOTER	31.4309	chr11:105045221-105045471	chr11	105045221	105045471	[31.43087, 8.55]	30	-	105045376	CARD16	ENST00000375704.7	31	-	105045315	CARD16	ENST00000375706.6
H929	27195	chr15	66504853	7.48	15	PROMOTER	26.166	chr15:66504728-66504978	chr15	66504728	66504978	[13.05, 26.166]	30	-	66504883	RPL4	ENST00000307961.10	106	+	66504959	ZWILCH	ENST00000535141.6:ENST00000307897.9	230	+	66505083	ZWILCH	ENST00000613446.4	264	+	66505117	ZWILCH	ENST00000446801.6	442	+	66505295	ZWILCH	ENST00000565627.5	1539	-	66503314	SNORD18A	ENST00000363753.1	1943	-	66502910	SNORD16	ENST00000362803.1
H929	23438	chr11	104956728	0	0	PROMOTER	10.5109	chr11:104956603-104956853	chr11	104956603	104956853	[10.51092]	30	-	104956698	CASP4	ENST00000393150.7
H929	31621	chr20	49278095	0	0	PROMOTER	10.131	chr20:49277970-49278220	chr20	49277970	49278220	[10.13101]	30	-	49278065	ZNFX1	ENST00000371752.5	83	+	49278178	ZFAS1	ENST00000450535.5	124	-	49278219	ZNFX1	ENST00000396105.5	331	-	49278426	ZNFX1	ENST00000371754.8	332	+	49278427	RF02215	ENST00000615787.1	845	+	49278940	SNORD12C	ENST00000386307.1	1021	+	49279116	RF02216	ENST00000610973.1	1079	+
H929	6710	chr3	28348599	5.48	11	PROMOTER	8.25481	chr3:28348474-28348724	chr3	28348474	28348724	[8.25481, 5.42]	30	-	28348629	AZI2	ENST00000334100.10	220	-	28348819	AZI2	ENST00000457172.5	451	-	28349050	AZI2	ENST00000420543.6	528	-	28349127	AZI2	ENST00000479665.5	550	+	28349149	ZCWPW2	ENST00000383768.6	579	+	28349178	RP11-9J18.1	ENST00000635992.1
H929	30041	chr18	56651158	0	0	PROMOTER	7.72894	chr18:56651033-56651283	chr18	56651033	56651283	[7.72894]	30	-	56651128	TXNL1	ENST00000590954.5	185	+	56651343	WDR7	ENST00000589935.1	203	+	56651361	WDR7	ENST00000357574.7	227	+	56651385	WDR7	ENST00000615645.4:ENST00000254442.7
H929	17752	chr8	29350698	0	0	PROMOTER	6.1476	chr8:29350573-29350823	chr8	29350573	29350823	[6.1476]	30	-	29350668	DUSP4	ENST00000240100.6	1893	-	29348805	DUSP4	ENST00000240101.2
H929	29369	chr17	78632087	0	0	PROMOTER	5.59278	chr17:78631962-78632212	chr17	78631962	78632212	[5.59278]	30	-	78632057	CTD-2357A8.3	ENST00000591384.5	36	-	78632051	CTD-2357A8.3	ENST00000586185.1
H929	8608	chr4	4542058	0	0	PROMOTER	5.38486	chr4:4541933-4542183	chr4	4541933	4542183	[5.38486]	30	-	4542028	STX18	ENST00000306200.6	48	-	4542010	STX18	ENST00000505286.5	146	+	4542204	RP11-323F5.2	ENST00000610009.5
H929	23674	chr11	112961306	7	14	PROMOTER	16.8147	chr11:112961181-112961431	chr11	112961181	112961431	[13.85, 16.81467]	31	+	112961275	NCAM1	ENST00000619839.4	59	+	112961247	NCAM1	ENST00000621518.4:ENST00000615112.4:ENST00000615285.4:ENST00000618266.4	62	+	112961368	NCAM1	ENST00000401611.6:ENST00000621128.4	96	+	112961402	NCAM1	ENST00000316851.11	130	+	112961436	NCAM1	ENST00000531044.5	131	+	112961437	NCAM1	ENST00000529356.5	174	+	112961480	NCAM1	ENST00000621850.4
H929	8416	chr3	185363089	109.5	219	PROMOTER	13.1942	chr3:185362964-185363214	chr3	185362964	185363214	[13.19422, 4.49686]	31	+	185363120	MAP3K13	ENST00000265026.7
H929	26269	chr14	69191480	2	4	PROMOTER	13.0544	chr14:69191355-69191605	chr14	69191355	69191605	[13.05445, 7.31]	31	+	69191511	EXD2	ENST00000409018.7	51	+	69191531	EXD2	ENST00000409014.5	75	+	69191555	EXD2	ENST00000409675.5	286	+	69191766	EXD2	ENST00000409949.5:ENST00000312994.9	326	+	69191806	EXD2	ENST00000409242.5	612	-	69192092	RP11-363J20.1	ENST00000557409.1
H929	25951	chr14	23035261	0	0	PROMOTER	11.8285	chr14:23035136-23035386	chr14	23035136	23035386	[11.8285]	31	-	23035230	PSMB5	ENST00000425762.2	116	-	23035145	PSMB5	ENST00000361611.10	367	-	23034894	PSMB5	ENST00000460922.2	371	-	23034890	PSMB5	ENST00000493471.2
H929	31932	chr21	17611713	4.47	9	PROMOTER	9.39193	chr21:17611588-17611838	chr21	17611588	17611838	[4.62, 9.39193]	31	+	17611744	BTG3-AS1	ENST00000626994.1	1131	-	17612844	BTG3	ENST00000339775.10	1234	-	17612947	BTG3	ENST00000348354.6
H929	29096	chr17	59210041	0	0	PROMOTER	8.04399	chr17:59209916-59210166	chr17	59209916	59210166	[8.04399]	31	+	59210010	SMG8	ENST00000300917.9	174	+	59209867	SMG8	ENST00000578922.1	641	+	59209400	SMG8	ENST00000543872.6
H929	31904	chr20	63864324	0	0	PROMOTER	7.62964	chr20:63864199-63864449	chr20	63864199	63864449	[7.62964]	31	-	63864293	RP4-591C20.9	ENST00000601296.2	904	+	63865228	TPD52L2	ENST00000611972.4:ENST00000615907.4	919	+	63865243	TPD52L2	ENST00000369927.8	966	+	63865290	TPD52L2	ENST00000346249.8:ENST00000348257.9:ENST00000352482.8	970	+	63865294	TPD52L2	ENST00000217121.9:ENST00000351424.8:ENST00000358548.4
H929	25541	chr12	124989090	0	0	PROMOTER	7.2732	chr12:124988965-124989215	chr12	124988965	124989215	[7.2732]	31	-	124989121	DHX37	ENST00000308736.6
H929	14355	chr6	28587304	0	0	PROMOTER	7.14927	chr6:28587179-28587429	chr6	28587179	28587429	[7.14927]	31	-	28587335	ZBED9	ENST00000452236.2	74	+	28587378	RP5-1186N24.3	ENST00000499525.1
H929	21125	chr10	15097211	0	0	PROMOTER	7.13879	chr10:15097086-15097336	chr10	15097086	15097336	[7.13879]	31	+	15097180	RPP38	ENST00000616640.1	108	-	15097319	C10orf111	ENST00000624760.1	120	+	15097331	RPP38	ENST00000378202.5	171	+	15097382	RPP38	ENST00000378197.4
H929	32912	chrX	103686699	0	1	PROMOTER	6.08413	chrX:103686574-103686824	chrX	103686574	103686824	[6.08413, 1.94]	31	-	103686668	MORF4L2	ENST00000441076.6	119	-	103686818	MORF4L2	ENST00000422154.6:ENST00000451301.5	585	+	103687284	RP5-1055C14.7	ENST00000435306.1	1365	-	103688064	MORF4L2	ENST00000360458.5	1459	-	103688158	MORF4L2	ENST00000433176.6
H929	6238	chr2	229922040	0	0	PROMOTER	5.34262	chr2:229921915-229922165	chr2	229921915	229922165	[5.34262]	31	-	229922009	TRIP12	ENST00000283943.9	41	-	229921999	TRIP12	ENST00000389044.8	88	-	229921952	TRIP12	ENST00000409677.5	137	-	229921903	TRIP12	ENST00000389045.7	262	+	229922302	FBXO36	ENST00000373652.7	456	+	229922496	FBXO36	ENST00000283946.7	466	+	229922506	FBXO36	ENST00000409992.1
H929	20895	chr9	135961411	0	0	PROMOTER	5.15355	chr9:135961286-135961536	chr9	135961286	135961536	[5.15355]	31	-	135961380	UBAC1	ENST00000371756.3
H929	14500	chr6	34392706	6.56	16	PROMOTER	149.69	chr6:34392581-34392831	chr6	34392581	34392831	[118.73, 114.96127, 149.69]	32	-	34392674	NUDT3	ENST00000607016.1
H929	10193	chr4	168318775	1.41	3	PROMOTER	64.5603	chr4:168318650-168318900	chr4	168318650	168318900	[64.56033, 24.47]	32	-	168318807	DDX60	ENST00000393743.7
H929	17840	chr8	33513569	8.49	17	PROMOTER	24.199	chr8:33513444-33513694	chr8	33513444	33513694	[19.07, 24.19902]	32	-	33513601	TTI2	ENST00000431156.6	94	+	33513475	SNORD13	ENST00000459299.1	384	-	33513185	TTI2	ENST00000613904.1	460	-	33513109	TTI2	ENST00000360742.9	857	-	33512712	TTI2	ENST00000520636.5
H929	25566	chr12	126772294	0	1	PROMOTER	15.7467	chr12:126772169-126772419	chr12	126772169	126772419	[15.7467, 7.58]	32	-	126772262	RP11-173C20.2	ENST00000536517.1	62	-	126772356	RP11-173C20.2	ENST00000542248.5	117	-	126772411	RP11-173C20.2	ENST00000540684.5
H929	8371	chr3	180036802	0	1	PROMOTER	11.5851	chr3:180036677-180036927	chr3	180036677	180036927	[11.58514, 3.88]	32	-	180036770	PEX5L	ENST00000263962.12	124	-	180036926	PEX5L	ENST00000465751.5	128	-	180036930	PEX5L	ENST00000467460.5	157	-	180036959	PEX5L	ENST00000472994.5	251	-	180037053	PEX5L	ENST00000485199.5
H929	1380	chr1	150765989	6	12	PROMOTER	7.01343	chr1:150765864-150766114	chr1	150765864	150766114	[3.26, 7.01343]	32	-	150765957	CTSS	ENST00000368985.7	197	-	150765792	CTSS	ENST00000448301.6
H929	25686	chr13	32538814	0	0	PROMOTER	6.75547	chr13:32538689-32538939	chr13	32538689	32538939	[6.75547]	32	-	32538782	N4BP2L2	ENST00000267068.5	71	-	32538885	N4BP2L2	ENST00000357505.10:ENST00000399396.7	128	-	32538686	N4BP2L2	ENST00000504114.5	1787	-	32537027	N4BP2L2	ENST00000446957.6
H929	17532	chr8	11284384	0	0	PROMOTER	6.31426	chr8:11284259-11284509	chr8	11284259	11284509	[6.31426]	32	+	11284416	MTMR9	ENST00000221086.7	684	-	11285068	AF131216.7	ENST00000638924.1	710	+	11285094	MTMR9	ENST00000526292.1
H929	21493	chr10	69088150	0	0	PROMOTER	5.06748	chr10:69088025-69088275	chr10	69088025	69088275	[5.06748]	32	+	69088118	SRGN	ENST00000242465.3
H929	30837	chr19	38315881	0	1	PROMOTER	38.9895	chr19:38315756-38316006	chr19	38315756	38316006	[19.72, 38.98946]	33	-	38315914	YIF1B	ENST00000592694.5	39	-	38315920	YIF1B	ENST00000591755.5	42	-	38315923	YIF1B	ENST00000337679.12	82	-	38315799	YIF1B	ENST00000591784.5	82	-	38315963	YIF1B	ENST00000339413.10	88	-	38315793	YIF1B	ENST00000329420.12
H929	7333	chr3	88059101	3	6	PROMOTER	19.2546	chr3:88058976-88059226	chr3	88058976	88059226	[19.25464, 6.99]	33	-	88059068	CGGBP1	ENST00000482016.5	53	-	88059048	CGGBP1	ENST00000309534.10	173	+	88059274	ZNF654	ENST00000636215.1	1792	-	88057309	CGGBP1	ENST00000398392.2
H929	7692	chr3	122564348	0	1	PROMOTER	19.1121	chr3:122564223-122564473	chr3	122564223	122564473	[19.11212, 8.02]	33	-	122564315	PARP9	ENST00000462315.5	79	+	122564427	DTX3L	ENST00000383661.3	95	-	122564253	PARP9	ENST00000492382.5	106	-	122564242	PARP9	ENST00000471785.5	110	+	122564238	DTX3L	ENST00000296161.8	229	-	122564577	PARP9	ENST00000477522.6:ENST00000360356.6
H929	2343	chr1	172444027	0	0	PROMOTER	18.1455	chr1:172443902-172444152	chr1	172443902	172444152	[18.14546]	33	-	172444060	PIGC	ENST00000344529.4	59	-	172444086	PIGC	ENST00000367728.1
H929	30655	chr19	12610770	4	8	PROMOTER	18.1455	chr19:12610645-12610895	chr19	12610645	12610895	[18.14546, 9.92]	33	-	12610803	ZNF490	ENST00000311437.10	148	+	12610918	ZNF791	ENST00000343325.8:ENST00000446165.2
H929	22997	chr11	78079898	0	0	PROMOTER	13.437	chr11:78079773-78080023	chr11	78079773	78080023	[13.43702]	33	-	78079865	NDUFC2-KCTD14	ENST00000530054.1	37	-	78079861	NDUFC2	ENST00000528164.1	54	-	78079844	NDUFC2-KCTD14	ENST00000528251.1	57	-	78079841	NDUFC2	ENST00000527806.1	79	-	78079819	NDUFC2	ENST00000534029.5:ENST00000525085.1	125	-	78079773	NDUFC2-KCTD14	ENST00000612612.5:ENST00000614236.2	321	-	78080219	NDUFC2	ENST00000281031.4
H929	12553	chr5	116085383	0	0	PROMOTER	9.18228	chr5:116085258-116085508	chr5	116085258	116085508	[9.18228]	33	-	116085416	CTD-2287O16.5	ENST00000606662.1	91	+	116085474	COMMD10	ENST00000515539.5	357	+	116085026	COMMD10	ENST00000632434.1	392	+	116084991	COMMD10	ENST00000274458.8
H929	13800	chr5	177600067	0	0	PROMOTER	8.62999	chr5:177599942-177600192	chr5	177599942	177600192	[8.62999]	33	+	177600100	B4GALT7	ENST00000029410.9
H929	27160	chr15	63504544	0	0	PROMOTER	6.73782	chr15:63504419-63504669	chr15	63504419	63504669	[6.73782]	33	+	63504511	USP3	ENST00000540797.5	67	+	63504611	USP3	ENST00000380324.7	1461	-	63503083	AC007950.2	ENST00000615045.1
H929	27317	chr15	75043309	76.64	170	PROMOTER	27.69	chr15:75043184-75043434	chr15	75043184	75043434	[26.96731, 27.69, 6.49]	34	+	75043275	PPCDC	ENST00000563393.1
H929	22670	chr11	43920860	1	2	PROMOTER	18.6591	chr11:43920735-43920985	chr11	43920735	43920985	[10.32, 18.65909]	34	-	43920894	RP11-613D13.7	ENST00000527960.1	66	-	43920926	RP11-613D13.7	ENST00000499194.5	216	+	43921076	RP11-613D13.4	ENST00000526408.1
H929	22300	chr11	4393662	1	2	PROMOTER	16.9319	chr11:4393537-4393787	chr11	4393537	4393787	[16.93194, 6.07]	34	-	4393696	TRIM21	ENST00000254436.7
H929	14345	chr6	28080941	0	0	PROMOTER	11.9365	chr6:28080816-28081066	chr6	28080816	28081066	[11.93649]	34	+	28080975	ZNF165	ENST00000377325.1	189	-	28081130	RP1-313I6.12	ENST00000605945.1
H929	11781	chr5	76850035	2	4	PROMOTER	10.3912	chr5:76849910-76850160	chr5	76849910	76850160	[2.57, 10.3912]	34	+	76850001	S100Z	ENST00000513010.5	64	+	76850099	S100Z	ENST00000317593.8
H929	5570	chr2	178804608	0	0	PROMOTER	9.70051	chr2:178804483-178804733	chr2	178804483	178804733	[9.70051]	34	-	178804642	TTN	ENST00000342175.11:ENST00000359218.10:ENST00000615779.5
H929	30666	chr19	13116715	0	0	PROMOTER	9.07665	chr19:13116590-13116840	chr19	13116590	13116840	[9.07665]	34	-	13116749	TRMT1	ENST00000357720.8	58	-	13116657	TRMT1	ENST00000221504.12	66	-	13116649	TRMT1	ENST00000437766.5	852	-	13117567	TRMT1	ENST00000592062.5	1622	+	13118337	NACC1	ENST00000292431.4
H929	26240	chr14	67359837	0	0	PROMOTER	7.42584	chr14:67359712-67359962	chr14	67359712	67359962	[7.42584]	34	-	67359803	ATP6V1D	ENST00000555474.5	50	-	67359787	ATP6V1D	ENST00000555431.5:ENST00000554236.5	160	+	67359997	EIF2S1	ENST00000256383.8	412	-	67360249	ATP6V1D	ENST00000216442.11
H929	28726	chr17	28951456	0	0	PROMOTER	6.75547	chr17:28951331-28951581	chr17	28951331	28951581	[6.75547]	34	-	28951490	PHF12	ENST00000268756.7	149	-	28951307	PHF12	ENST00000577226.5	315	-	28951771	PHF12	ENST00000332830.8
H929	90	chr1	9239810	10	20	PROMOTER	6.61	chr1:9239685-9239935	chr1	9239685	9239935	[6.61, 5.68548]	34	+	9239844	H6PD	ENST00000602477.1
H929	5990	chr2	208266312	0	0	PROMOTER	5.6952	chr2:208266187-208266437	chr2	208266187	208266437	[5.6952]	34	+	208266278	PIKFYVE	ENST00000308862.10:ENST00000407449.5	45	+	208266267	PIKFYVE	ENST00000392202.7:ENST00000264380.8
H929	19222	chr8	106060558	42.2	91	PROMOTER	5.64936	chr8:106060433-106060683	chr8	106060433	106060683	[5.64936, 4.44, 2.44]	34	-	106060524	RP11-152P17.2	ENST00000520433.5	81	-	106060477	RP11-152P17.2	ENST00000524045.6	115	-	106060443	RP11-152P17.2	ENST00000509144.2
H929	24783	chr12	55973878	2.45	5	PROMOTER	86.2118	chr12:55973753-55974003	chr12	55973753	55974003	[86.21182, 57.59]	35	+	55973913	RAB5B	ENST00000553116.5	133	+	55974011	RAB5B	ENST00000360299.9	223	+	55974101	RAB5B	ENST00000448789.2
H929	25309	chr12	109052551	0	1	PROMOTER	44.9231	chr12:109052426-109052676	chr12	109052426	109052676	[44.92313, 30.17]	35	+	109052586	USP30	ENST00000257548.9	1401	-	109053952	RP11-117B7.1	ENST00000478808.2
H929	5780	chr2	196176538	2.45	5	PROMOTER	17.8201	chr2:196176413-196176663	chr2	196176413	196176663	[17.82008, 1.11]	35	-	196176503	STK17B	ENST00000409228.5
H929	20878	chr9	133030969	0	0	PROMOTER	13.7251	chr9:133030844-133031094	chr9	133030844	133031094	[13.72507]	35	+	133031004	GTF3C5	ENST00000372108.9:ENST00000342018.12	280	+	133030689	GTF3C5	ENST00000372097.9	294	+	133030675	GTF3C5	ENST00000372099.10
H929	20031	chr9	32573124	25.53	62	PROMOTER	13.5002	chr9:32572999-32573249	chr9	32572999	32573249	[6.01, 13.50019, 5.57]	35	-	32573159	NDUFB6	ENST00000350021.2	38	-	32573162	NDUFB6	ENST00000379847.7	60	-	32573184	NDUFB6	ENST00000366466.5
H929	28888	chr17	42562112	6	12	PROMOTER	12.4788	chr17:42561987-42562237	chr17	42561987	42562237	[7.78, 12.47883]	35	+	42562147	COASY	ENST00000421097.6	39	+	42562151	COASY	ENST00000590958.5	55	+	42562167	COASY	ENST00000393818.2
H929	14347	chr6	28136884	7	14	PROMOTER	11.1429	chr6:28136759-28137009	chr6	28136759	28137009	[11.14292, 2.53]	35	+	28136849	RP1-265C24.8	ENST00000565046.1	409	-	28137293	RP1-265C24.9	ENST00000600652.1
H929	20884	chr9	134164529	0	0	PROMOTER	8.69983	chr9:134164404-134164654	chr9	134164404	134164654	[8.69983]	35	-	134164564	RNU6ATAC	ENST00000408749.1
H929	28805	chr17	35587239	0	0	PROMOTER	8.28656	chr17:35587114-35587364	chr17	35587114	35587364	[8.28656]	35	+	35587274	AP2B1	ENST00000621914.4	75	+	35587314	AP2B1	ENST00000616681.4	83	+	35587322	AP2B1	ENST00000610402.4	213	+	35587452	AP2B1	ENST00000612116.5	276	+	35587515	AP2B1	ENST00000618940.4
H929	7571	chr3	112294192	8.49	17	PROMOTER	7.14927	chr3:112294067-112294317	chr3	112294067	112294317	[7.14927, 6.17]	35	-	112294227	SLC9C1	ENST00000487372.5	66	-	112294258	SLC9C1	ENST00000305815.9
H929	27956	chr16	28950902	0	0	PROMOTER	6.31426	chr16:28950777-28951027	chr16	28950777	28951027	[6.31426]	35	+	28950937	NFATC2IP	ENST00000320805.8	95	+	28950807	NFATC2IP	ENST00000564978.5
H929	6288	chr2	232611843	2	4	PROMOTER	5.68548	chr2:232611718-232611968	chr2	232611718	232611968	[2.67, 5.68548]	35	-	232611878	AC073254.1	ENST00000597495.1	128	-	232611971	AC073254.1	ENST00000415506.6:ENST00000598700.5:ENST00000596622.1
H929	18110	chr8	51257723	1.41	3	PROMOTER	5.59729	chr8:51257598-51257848	chr8	51257598	51257848	[5.59729, 1.61]	35	+	51257688	RP11-401H2.1	ENST00000521294.1
H929	15802	chr6	151452223	0	0	PROMOTER	5.06753	chr6:151452098-151452348	chr6	151452098	151452348	[5.06753]	35	+	151452258	ARMT1	ENST00000545879.5	42	-	151452181	RMND1	ENST00000444024.2	64	+	151452287	ARMT1	ENST00000367294.3	65	-	151452158	RMND1	ENST00000622845.5	97	-	151452126	RMND1	ENST00000367303.9	205	-	151452018	RMND1	ENST00000491268.2
H929	16831	chr7	100586590	2.45	5	PROMOTER	32.2898	chr7:100586465-100586715	chr7	100586465	100586715	[15.64, 32.28978]	36	+	100586626	FBXO24	ENST00000465843.5	286	+	100586304	FBXO24	ENST00000241071.10	437	-	100586153	LRCH4	ENST00000310300.10	1470	-	100585120	LRCH4	ENST00000497245.2
H929	28564	chr17	8173551	1	2	PROMOTER	23.0895	chr17:8173426-8173676	chr17	8173426	8173676	[23.08949, 13.68]	36	-	8173587	SNORD118	ENST00000363593.1
H929	17692	chr8	26867309	0	0	PROMOTER	17.737	chr8:26867184-26867434	chr8	26867184	26867434	[17.73696]	36	-	26867273	ADRA1A	ENST00000380573.3	1904	-	26865405	ADRA1A	ENST00000380586.5:ENST00000380582.7:ENST00000276393.8:ENST00000380572.3
H929	9406	chr4	87391350	60.1	128	PROMOTER	11.6488	chr4:87391225-87391475	chr4	87391225	87391475	[1.94, 3.31, 11.64881]	36	-	87391386	HSD17B11	ENST00000358290.8	201	-	87391149	HSD17B11	ENST00000507286.1
H929	289	chr1	25232450	0	0	PROMOTER	10.2428	chr1:25232325-25232575	chr1	25232325	25232575	[10.24276]	36	-	25232486	SYF2	ENST00000354361.3	43	-	25232493	SYF2	ENST00000236273.8	136	+	25232586	RP3-465N24.7	ENST00000641729.1
H929	29364	chr17	78187197	0	0	PROMOTER	8.25808	chr17:78187072-78187322	chr17	78187072	78187322	[8.25808]	36	-	78187233	TK1	ENST00000301634.11:ENST00000588734.5	120	+	78187317	AFMID	ENST00000409257.9	159	-	78187038	TK1	ENST00000590430.5	161	-	78187036	TK1	ENST00000590862.5	165	+	78187362	AFMID	ENST00000589256.5:ENST00000588800.5:ENST00000591952.5:ENST00000327898.9	204	+	78187401	AFMID	ENST00000586731.1
H929	8262	chr3	170870231	48.33	104	PROMOTER	6.12	chr3:170870106-170870356	chr3	170870106	170870356	[2.4, 6.12, 2.4868]	36	-	170870195	RPL22L1	ENST00000463836.1	252	-	170870483	RPL22L1	ENST00000295830.12
H929	15779	chr6	149746608	0	0	PROMOTER	5.79067	chr6:149746483-149746733	chr6	149746483	149746733	[5.79067]	36	-	149746572	NUP43	ENST00000340413.6	80	-	149746528	NUP43	ENST00000367404.8
H929	30521	chr19	5690352	0	0	PROMOTER	5.74583	chr19:5690227-5690477	chr19	5690227	5690477	[5.74583]	36	+	5690316	RPL36	ENST00000394580.2	46	+	5690306	RPL36	ENST00000579446.1	156	+	5690196	RPL36	ENST00000347512.7
H929	26076	chr14	49620649	0	0	PROMOTER	5.11399	chr14:49620524-49620774	chr14	49620524	49620774	[5.11399]	36	-	49620685	RPL36AL	ENST00000298289.6	146	+	49620795	MGAT2	ENST00000305386.3
H929	430	chr1	33036955	5.48	11	PROMOTER	150.81	chr1:33036830-33037080	chr1	33036830	33037080	[57.6319, 150.81]	37	-	33036992	AK2	ENST00000354858.10	44	-	33036911	AK2	ENST00000629371.2	69	-	33036886	AK2	ENST00000467905.5	78	-	33036877	AK2	ENST00000480134.5	85	-	33036870	AK2	ENST00000373449.6	96	-	33036859	AK2	ENST00000626911.1	111	-	33036844	AK2	ENST00000487289.1	115	-
H929	1522	chr1	154628001	2.45	5	PROMOTER	50.6439	chr1:154627876-154628126	chr1	154627876	154628126	[30.39, 50.64394]	37	-	154627964	ADAR	ENST00000368471.7
H929	31065	chr19	49677115	5	10	PROMOTER	21.9489	chr19:49676990-49677240	chr19	49676990	49677240	[21.94895, 9.66]	37	+	49677152	PRMT1	ENST00000391851.8:ENST00000610806.4	157	+	49677272	PRMT1	ENST00000454376.6	1218	+	49675897	PRMT1	ENST00000532489.5
H929	16391	chr7	43729578	1	2	PROMOTER	21.3205	chr7:43729453-43729703	chr7	43729453	43729703	[10.07, 21.32052]	37	-	43729541	COA1	ENST00000223336.10	89	-	43729489	COA1	ENST00000310564.10
H929	5013	chr2	119366791	1	2	PROMOTER	20.3879	chr2:119366666-119366916	chr2	119366666	119366916	[20.38792, 5.51]	37	-	119366828	C2orf76	ENST00000334816.11	49	-	119366742	C2orf76	ENST00000409466.6	109	-	119366682	C2orf76	ENST00000409523.1:ENST00000409877.5	130	+	119366921	DBI	ENST00000355857.7	133	+	119366924	DBI	ENST00000535617.5:ENST00000535757.5	186	+	119366977	DBI	ENST00000627093.2	198	+	119366989	DBI	ENST00000409094.5	257	+
H929	32450	chr22	42278225	0	1	PROMOTER	15.902	chr22:42278100-42278350	chr22	42278100	42278350	[15.90201, 4.98]	37	+	42278188	CTA-989H11.1	ENST00000609564.1	1870	+	42276355	Z83851.4	ENST00000420096.2
H929	12189	chr5	97183185	6	12	PROMOTER	14.3071	chr5:97183060-97183310	chr5	97183060	97183310	[14.30713, 8.02]	37	-	97183222	RIOK2	ENST00000508447.1	75	-	97183260	RIOK2	ENST00000283109.7
H929	8128	chr3	156554162	0	0	PROMOTER	10.762	chr3:156554037-156554287	chr3	156554037	156554287	[10.76195]	37	-	156554125	SSR3	ENST00000496050.1	683	-	156554845	SSR3	ENST00000463503.5	963	-	156555125	SSR3	ENST00000476217.5	987	-	156555149	SSR3	ENST00000467789.5	1022	-	156555184	SSR3	ENST00000265044.6
H929	20800	chr9	125189976	0	0	PROMOTER	6.75547	chr9:125189851-125190101	chr9	125189851	125190101	[6.75547]	37	-	125189939	PPP6C	ENST00000415905.5:ENST00000451402.5	158	-	125189818	PPP6C	ENST00000373547.8
H929	16810	chr7	99472804	0	0	PROMOTER	5.68548	chr7:99472679-99472929	chr7	99472679	99472929	[5.68548]	37	+	99472841	ZNF789	ENST00000331410.9	86	+	99472890	ZNF789	ENST00000448667.5:ENST00000483089.5	89	+	99472893	ZNF789	ENST00000493485.5	108	+	99472912	ZNF789	ENST00000379724.3
H929	25706	chr13	40771210	0	0	PROMOTER	5.67647	chr13:40771085-40771335	chr13	40771085	40771335	[5.67647]	37	-	40771173	MRPS31	ENST00000323563.7
H929	28989	chr17	49678073	0	0	PROMOTER	5.06753	chr17:49677948-49678198	chr17	49677948	49678198	[5.06753]	37	-	49678110	SPOP	ENST00000393328.6	90	-	49678163	SPOP	ENST00000347630.6	161	-	49678234	SPOP	ENST00000504102.5
H929	1495	chr1	153990793	3.46	7	PROMOTER	12.2808	chr1:153990668-153990918	chr1	153990668	153990918	[8.6, 12.2808]	38	+	153990755	RPS27	ENST00000368567.5
H929	32344	chr22	35648357	4.47	9	PROMOTER	11.4442	chr22:35648232-35648482	chr22	35648232	35648482	[9.52, 11.44419]	38	+	35648395	APOL6	ENST00000409652.4
H929	30754	chr19	19192192	0	0	PROMOTER	10.1002	chr19:19192067-19192317	chr19	19192067	19192317	[10.10021]	38	+	19192230	RFXANK	ENST00000303088.8	51	+	19192243	RFXANK	ENST00000456252.7	53	-	19192139	BORCS8	ENST00000585679.1	54	-	19192138	BORCS8-MEF2B	ENST00000514819.7	61	-	19192131	BORCS8-MEF2B	ENST00000444486.7	397	-	19192589	BORCS8	ENST00000462790.7:ENST00000477565.3	571	+	19192763	RFXANK	ENST00000407360.7	719	+
H929	17108	chr7	128343832	0	0	PROMOTER	7.2732	chr7:128343707-128343957	chr7	128343707	128343957	[7.2732]	38	-	128343870	RBM28	ENST00000415472.6	76	-	128343908	RBM28	ENST00000223073.6	249	+	128344081	RNU7-27P	ENST00000459281.1
H929	7450	chr3	101686820	0	0	PROMOTER	6.6768	chr3:101686695-101686945	chr3	101686695	101686945	[6.6768]	38	-	101686782	RPL24	ENST00000394077.7	115	-	101686705	RPL24	ENST00000495401.5	125	-	101686695	RPL24	ENST00000469605.1
H929	4611	chr2	73737438	100.46	217	PROMOTER	6.469	chr2:73737313-73737563	chr2	73737313	73737563	[3.55404, 6.469, 4.56]	38	-	73737400	TPRKB	ENST00000318190.7:ENST00000409716.6	52	-	73737386	TPRKB	ENST00000272424.9
H929	17637	chr8	23069059	0	0	PROMOTER	6.46085	chr8:23068934-23069184	chr8	23068934	23069184	[6.46085]	38	-	23069021	TNFRSF10B	ENST00000347739.3	120	-	23069179	TNFRSF10B	ENST00000276431.8	830	+	23068229	RP11-875O11.2	ENST00000501897.1
H929	5960	chr2	206086220	0	0	PROMOTER	6.44607	chr2:206086095-206086345	chr2	206086095	206086345	[6.44607]	38	-	206086182	INO80D	ENST00000403263.5	698	+	206085522	AC007383.3	ENST00000435627.1	1615	+	206084605	AC007383.3	ENST00000420509.1
H929	22788	chr11	62622116	0	0	PROMOTER	6.03802	chr11:62621991-62622241	chr11	62621991	62622241	[6.03802]	38	-	62622154	B3GAT3	ENST00000531383.5	59	-	62622175	B3GAT3	ENST00000265471.9	132	-	62621984	B3GAT3	ENST00000534026.5
H929	8724	chr4	15778317	2	4	PROMOTER	22.1273	chr4:15778192-15778442	chr4	15778192	15778442	[22.12728, 11.17]	39	+	15778278	CD38	ENST00000226279.7
H929	2380	chr1	172906939	4	8	PROMOTER	18.254	chr1:172906814-172907064	chr1	172906814	172907064	[18.25404, 3.47]	39	+	172906900	RP3-471M13.2	ENST00000452366.1
H929	9570	chr4	104966832	3	6	PROMOTER	11.8285	chr4:104966707-104966957	chr4	104966707	104966957	[4.38, 11.8285]	39	-	104966793	RP11-556I14.2	ENST00000515127.1
H929	6296	chr2	233251532	0	1	PROMOTER	10.8683	chr2:233251407-233251657	chr2	233251407	233251657	[5.23, 10.86832]	39	+	233251571	ATG16L1	ENST00000347464.9:ENST00000392017.8	140	+	233251672	ATG16L1	ENST00000373525.9	174	+	233251706	ATG16L1	ENST00000392020.8	182	+	233251714	ATG16L1	ENST00000392018.1
H929	14335	chr6	27890753	0	1	PROMOTER	8.28656	chr6:27890628-27890878	chr6	27890628	27890878	[5.92, 8.28656]	39	-	27890792	HIST1H3J	ENST00000359303.3
H929	14482	chr6	33272114	3	6	PROMOTER	7.6212	chr6:33271989-33272239	chr6	33271989	33272239	[7.6212, 5.91]	39	+	33272075	RPS18	ENST00000474973.5	104	+	33272010	RPS18	ENST00000439602.6	220	-	33271894	VPS52	ENST00000445902.2	238	-	33271876	VPS52	ENST00000482399.5
H929	31247	chr20	31722937	0	0	PROMOTER	7.17904	chr20:31722812-31723062	chr20	31722812	31723062	[7.17904]	39	-	31722898	BCL2L1	ENST00000307677.4	77	-	31722860	BCL2L1	ENST00000376055.8	340	-	31722597	BCL2L1	ENST00000376062.6	1430	+	31721507	ABALON	ENST00000629058.1
H929	28393	chr16	84594354	2.45	5	PROMOTER	5.67647	chr16:84594229-84594479	chr16	84594229	84594479	[4.61, 5.67647]	39	+	84594393	RP11-61F12.1	ENST00000564809.1
H929	28626	chr17	16217170	0	0	PROMOTER	5.38677	chr17:16217045-16217295	chr17	16217045	16217295	[5.38677]	39	+	16217209	PIGL	ENST00000581006.5	40	+	16217210	PIGL	ENST00000225609.9:ENST00000395844.8	1610	-	16215560	NCOR1	ENST00000395857.7	1621	-	16215549	NCOR1	ENST00000268712.7
H929	1577	chr1	156054712	87.3	190	PROMOTER	12.1294	chr1:156054587-156054837	chr1	156054587	156054837	[4.42, 12.1294, 4.9]	40	+	156054752	LAMTOR2	ENST00000368305.8	80	+	156054792	LAMTOR2	ENST00000368304.9	138	+	156054850	LAMTOR2	ENST00000368302.3	918	-	156053794	UBQLN4	ENST00000368309.3
H929	6028	chr2	213284339	0	0	PROMOTER	11.718	chr2:213284214-213284464	chr2	213284214	213284464	[11.71805]	40	+	213284379	SPAG16	ENST00000272898.11	50	+	213284389	SPAG16	ENST00000331683.9	53	+	213284392	SPAG16	ENST00000432529.6	77	+	213284416	SPAG16	ENST00000413312.5	134	-	213284205	AC079610.2	ENST00000360083.3	142	+	213284481	SPAG16	ENST00000447990.1
H929	31360	chr20	37096035	0	0	PROMOTER	10.7975	chr20:37095910-37096160	chr20	37095910	37096160	[10.79755]	40	-	37095995	RBL1	ENST00000373664.7	46	-	37095989	RBL1	ENST00000344359.7	250	+	37095785	RP4-621N11.2	ENST00000598590.1
H929	426	chr1	32818193	2.45	5	PROMOTER	6.16083	chr1:32818068-32818318	chr1	32818068	32818318	[6.16083, 3.99]	40	-	32818153	YARS	ENST00000373477.8	638	+	32817555	S100PBP	ENST00000373475.9	751	+	32817442	S100PBP	ENST00000373476.5	949	-	32817244	YARS	ENST00000616261.1
H929	1132	chr1	120069666	1.41	3	PROMOTER	5.59278	chr1:120069541-120069791	chr1	120069541	120069791	[4.38, 5.59278]	40	-	120069626	NOTCH2	ENST00000256646.6
H929	110	chr1	10474927	0	0	PROMOTER	5.07554	chr1:10474802-10475052	chr1	10474802	10475052	[5.07554]	40	+	10474887	PEX14	ENST00000356607.8
H929	12442	chr5	111092273	5	10	PROMOTER	12.5005	chr5:111092148-111092398	chr5	111092148	111092398	[12.50054, 5.85]	41	+	111092314	WDR36	ENST00000513710.3	101	+	111092172	WDR36	ENST00000612402.4	158	-	111092115	CTC-551A13.2	ENST00000507269.3	557	+	111091716	WDR36	ENST00000506538.6
H929	26913	chr15	38454086	3	6	PROMOTER	11.5851	chr15:38453961-38454211	chr15	38453961	38454211	[11.58514, 4.84]	41	+	38454127	FAM98B	ENST00000397609.6	68	+	38454154	FAM98B	ENST00000491535.5
H929	25708	chr13	41019355	8.49	17	PROMOTER	8.25481	chr13:41019230-41019480	chr13	41019230	41019480	[8.25481, 2.6]	41	-	41019314	ELF1	ENST00000239882.6
H929	14820	chr6	63571971	0	0	PROMOTER	6.33463	chr6:63571846-63572096	chr6	63571846	63572096	[6.33463]	41	+	63572012	PTP4A1	ENST00000370651.5	437	-	63572408	RP5-1148A21.3	ENST00000584934.1	710	+	63572681	PTP4A1	ENST00000578299.1
H929	3351	chr1	223144008	4.47	9	PROMOTER	6.03541	chr1:223143883-223144133	chr1	223143883	223144133	[6.03541, 4.33]	41	+	223144049	RP11-239E10.2	ENST00000435108.1	726	-	223143282	TLR5	ENST00000642603.1	760	-	223143248	TLR5	ENST00000366881.6
H929	23145	chr11	93543467	0	0	PROMOTER	5.9552	chr11:93543342-93543592	chr11	93543342	93543592	[5.9552]	41	-	93543508	SMCO4	ENST00000298966.6
H929	16707	chr7	87219775	1	2	PROMOTER	33.0008	chr7:87219650-87219900	chr7	87219650	87219900	[33.00077, 11.92]	42	-	87219733	TMEM243	ENST00000257637.7	145	-	87219630	TMEM243	ENST00000423734.1	812	-	87220587	TMEM243	ENST00000433078.5	1063	-	87218712	RF00019	ENST00000363527.1
H929	14374	chr6	28839048	4.47	9	PROMOTER	26.166	chr6:28838923-28839173	chr6	28838923	28839173	[26.166, 6.34]	42	-	28839006	XXbac-BPG308K3.5	ENST00000457253.1
H929	3066	chr1	209768446	1	2	PROMOTER	15.6415	chr1:209768321-209768571	chr1	209768321	209768571	[7.17, 15.64149]	42	+	209768488	TRAF3IP3	ENST00000367023.5	169	+	209768615	TRAF3IP3	ENST00000477431.1
H929	32184	chr22	21982858	1	2	PROMOTER	13.2967	chr22:21982733-21982983	chr22	21982733	21982983	[2.74, 13.29674]	42	-	21982816	TOP3B	ENST00000357179.9	108	-	21982750	TOP3B	ENST00000398793.6
H929	28746	chr17	30906277	0	0	PROMOTER	10.9511	chr17:30906152-30906402	chr17	30906152	30906402	[10.95114]	42	-	30906235	TEFM	ENST00000580840.1	543	-	30906820	TEFM	ENST00000581216.5
H929	14241	chr6	26197208	14	28	PROMOTER	10	chr6:26197083-26197333	chr6	26197083	26197333	[9.77152, 10.0]	42	-	26197250	HIST1H3D	ENST00000356476.2
H929	16086	chr7	23105661	0	0	PROMOTER	5.20497	chr7:23105536-23105786	chr7	23105536	23105786	[5.20497]	42	-	23105703	AC006039.4	ENST00000419813.1	123	+	23105784	KLHL7	ENST00000339077.9	124	+	23105785	KLHL7	ENST00000322275.9	634	+	23106295	KLHL7	ENST00000409689.5	637	+	23106298	KLHL7	ENST00000410047.1
H929	26550	chr14	91114643	1.41	3	PROMOTER	41.8619	chr14:91114518-91114768	chr14	91114518	91114768	[41.86192, 25.73]	43	+	91114686	DGLUCY	ENST00000522322.5	57	+	91114700	DGLUCY	ENST00000523771.5	201	+	91114442	DGLUCY	ENST00000428926.6	253	+	91114390	DGLUCY	ENST00000523816.5	255	+	91114388	DGLUCY	ENST00000519019.5	273	+	91114370	DGLUCY	ENST00000518868.5	556	+	91114087	DGLUCY	ENST00000518665.6	558	+
H929	14452	chr6	31972027	3	6	PROMOTER	37.8672	chr6:31971902-31972152	chr6	31971902	31972152	[19.41, 37.86718]	43	-	31971984	DXO	ENST00000375356.7	83	+	31971944	STK19	ENST00000375333.2	196	+	31971831	STK19	ENST00000375331.6	263	-	31972290	DXO	ENST00000375349.7	265	-	31972292	DXO	ENST00000337523.9
H929	9580	chr4	105708724	7.48	15	PROMOTER	36.4656	chr4:105708599-105708849	chr4	105708599	105708849	[36.46556, 12.77]	43	-	105708681	INTS12	ENST00000340139.9	60	+	105708784	GSTCD	ENST00000394730.7	63	+	105708787	GSTCD	ENST00000507281.5	94	+	105708818	GSTCD	ENST00000515279.5	384	-	105709108	INTS12	ENST00000451321.6	643	-	105708081	INTS12	ENST00000394735.5
H929	5704	chr2	190882102	9	18	PROMOTER	16.6729	chr2:190881977-190882227	chr2	190881977	190882227	[8.17, 16.67287]	43	-	190882059	AC005540.3	ENST00000413911.1	1268	+	190880834	GLS	ENST00000338435.8	1275	+	190880827	GLS	ENST00000320717.7
H929	14592	chr6	41921050	1	2	PROMOTER	11.6488	chr6:41920925-41921175	chr6	41920925	41921175	[11.64881, 2.68]	43	-	41921093	MED20	ENST00000409060.1	49	-	41921099	MED20	ENST00000265350.8	69	-	41921119	MED20	ENST00000409312.5	138	+	41921188	BYSL	ENST00000230340.8
H929	19835	chr9	6015661	1.41	3	PROMOTER	11.0391	chr9:6015536-6015786	chr9	6015536	6015786	[11.03915, 6.23]	43	-	6015618	RANBP6	ENST00000259569.5	49	-	6015612	RANBP6	ENST00000485372.1
H929	12664	chr5	121961918	60.6	137	PROMOTER	7.3	chr5:121961793-121962043	chr5	121961793	121962043	[7.3, 5.27474, 6.02]	43	+	121961961	SRFBP1	ENST00000339397.4
H929	6982	chr3	50351134	0	0	PROMOTER	5.99391	chr3:50351009-50351259	chr3	50351009	50351259	[5.99391]	43	-	50351091	NPRL2	ENST00000232501.7	242	+	50350892	XXcos-LUCA11.5	ENST00000606589.1	276	+	50350858	CYB561D2	ENST00000418577.1	289	+	50350845	CYB561D2	ENST00000424512.5:ENST00000232508.9	439	+	50350695	CYB561D2	ENST00000425346.5
H929	23515	chr11	108223059	5.48	11	PROMOTER	32.41	chr11:108222934-108223184	chr11	108222934	108223184	[32.41, 28.6603]	44	+	108223103	ATM	ENST00000530958.5	57	+	108223116	ATM	ENST00000452508.6	113	+	108223172	ATM	ENST00000639953.1:ENST00000640388.1	115	+	108223174	ATM	ENST00000639240.1	227	+	108222832	ATM	ENST00000278616.8	417	-	108222642	NPAT	ENST00000278612.8	470	+	108223529	ATM	ENST00000526567.5
H929	3740	chr2	3575161	5.48	11	PROMOTER	30.4988	chr2:3575036-3575286	chr2	3575036	3575286	[30.49883, 15.81]	44	+	3575205	RPS7	ENST00000304921.9	99	+	3575260	RPS7	ENST00000645674.1	155	+	3575316	RPS7	ENST00000646909.1	164	+	3575325	RPS7	ENST00000403564.5:ENST00000462576.5	184	+	3575345	RPS7	ENST00000407445.8	197	+	3575358	RPS7	ENST00000406376.1
H929	28490	chr17	2266243	3	6	PROMOTER	24.3826	chr17:2266118-2266368	chr17	2266118	2266368	[24.38258, 9.12]	44	-	2266199	SMG6	ENST00000354901.8
H929	17655	chr8	24293996	5.48	11	PROMOTER	15.4907	chr8:24293871-24294121	chr8	24293871	24294121	[15.49068, 6.08]	44	+	24294040	ADAM28	ENST00000265769.8	115	+	24294111	ADAM28	ENST00000437154.6
H929	16653	chr7	77416444	0	0	PROMOTER	14.2359	chr7:77416319-77416569	chr7	77416319	77416569	[14.2359]	44	-	77416400	GSAP	ENST00000257626.11	229	+	77416673	RP5-899E9.1	ENST00000608884.1	577	-	77415867	GSAP	ENST00000430584.1
H929	15312	chr6	113873395	1	2	PROMOTER	11.8285	chr6:113873270-113873520	chr6	113873270	113873520	[3.69, 11.8285]	44	-	113873351	RP1-249H1.4	ENST00000434296.2
H929	31661	chr20	50958506	25.42	62	PROMOTER	11.5759	chr20:50958381-50958631	chr20	50958381	50958631	[3.34, 11.5759, 5.25]	44	-	50958550	DPM1	ENST00000371588.9	49	-	50958555	DPM1	ENST00000371582.8	320	+	50958826	MOCS3	ENST00000244051.2
H929	1213	chr1	145608092	0	0	PROMOTER	10.4314	chr1:145607967-145608217	chr1	145607967	145608217	[10.43143]	44	+	145608048	GPR89A	ENST00000534502.5	102	+	145607990	GPR89A	ENST00000313835.13	521	+	145608613	GPR89A	ENST00000462900.2
H929	21827	chr10	96090269	6.48	13	PROMOTER	9.70956	chr10:96090144-96090394	chr10	96090144	96090394	[9.70956, 7.02]	44	-	96090225	RP11-429G19.2	ENST00000458228.5	55	-	96090214	RP11-429G19.2	ENST00000416301.5	57	-	96090212	RP11-429G19.2	ENST00000454638.5	71	-	96090198	RP11-429G19.2	ENST00000452728.5
H929	1390	chr1	151006901	0	0	PROMOTER	9.08945	chr1:151006776-151007026	chr1	151006776	151007026	[9.08945]	44	-	151006857	MINDY1	ENST00000312210.9	416	-	151006485	MINDY1	ENST00000493834.2	497	-	151006404	MINDY1	ENST00000622754.4	1464	-	151008365	MINDY1	ENST00000361936.9	1474	-	151008375	MINDY1	ENST00000361738.10	1576	+	151008477	PRUNE1	ENST00000271620.7	1577	+	151008478	PRUNE1	ENST00000368937.5	1582	+
H929	27185	chr15	65611175	0	0	PROMOTER	8.57326	chr15:65611050-65611300	chr15	65611050	65611300	[3.82, 8.57326]	44	-	65611131	INTS14	ENST00000569491.5	54	-	65611121	INTS14	ENST00000567744.5	67	-	65611242	INTS14	ENST00000420799.6	70	-	65611245	INTS14	ENST00000313182.6	83	-	65611258	INTS14	ENST00000431261.6	114	-	65611289	INTS14	ENST00000442903.3	230	+	65611405	SLC24A1	ENST00000537259.5
H929	17229	chr7	139341316	0	0	PROMOTER	7.87189	chr7:139341191-139341441	chr7	139341191	139341441	[7.87189]	44	+	139341360	C7orf55-LUC7L2	ENST00000541515.3	184	+	139341132	FMC1	ENST00000297534.6	957	+	139340359	LUC7L2	ENST00000541170.7
H929	28097	chr16	56989542	0	0	PROMOTER	7.83344	chr16:56989417-56989667	chr16	56989417	56989667	[7.83344]	44	+	56989498	NLRC5	ENST00000262510.10
H929	5209	chr2	148020805	0	0	PROMOTER	6.80918	chr2:148020680-148020930	chr2	148020680	148020930	[6.80918]	44	-	148020761	ORC4	ENST00000536575.5	58	-	148020747	ORC4	ENST00000535373.5	68	-	148020737	ORC4	ENST00000540442.5	82	-	148020723	ORC4	ENST00000392857.9	206	+	148021011	MBD5	ENST00000407073.5	701	+	148021506	MBD5	ENST00000638043.2:ENST00000642680.1	799	-	148021604	ORC4	ENST00000264169.6
H929	29003	chr17	50373152	0	0	PROMOTER	5.87575	chr17:50373027-50373277	chr17	50373027	50373277	[5.87575]	44	-	50373196	MRPL27	ENST00000503633.5	55	-	50373207	MRPL27	ENST00000442592.3	62	-	50373214	MRPL27	ENST00000225969.8	68	+	50373220	EME1	ENST00000393271.6:ENST00000338165.8	192	-	50372960	MRPL27	ENST00000507088.5	1989	-	50371163	MRPL27	ENST00000511860.1
H929	25873	chr13	112588211	0	0	PROMOTER	5.638	chr13:112588086-112588336	chr13	112588086	112588336	[5.638]	44	-	112588167	TUBGCP3	ENST00000261965.7	76	-	112588135	TUBGCP3	ENST00000464139.5	86	-	112588125	TUBGCP3	ENST00000375669.7
H929	32295	chr22	31496183	0	0	PROMOTER	5.09558	chr22:31496058-31496308	chr22	31496058	31496308	[5.09558]	44	+	31496139	SFI1	ENST00000540643.5	92	+	31496275	SFI1	ENST00000432498.5	204	+	31496387	SFI1	ENST00000443011.5	355	+	31496538	SFI1	ENST00000400289.5	380	+	31496563	SFI1	ENST00000400288.6
H929	32358	chr22	36860944	0	1	PROMOTER	5.07554	chr22:36860819-36861069	chr22	36860819	36861069	[5.07554, 4.51]	44	+	36860988	NCF4	ENST00000248899.10:ENST00000397147.6
H929	1502	chr1	154272466	5	10	PROMOTER	39.7722	chr1:154272341-154272591	chr1	154272341	154272591	[39.77215, 18.89]	45	+	154272511	HAX1	ENST00000328703.11	123	+	154272589	HAX1	ENST00000457918.6	143	+	154272609	HAX1	ENST00000483970.6	202	+	154272668	HAX1	ENST00000532105.1
H929	9364	chr4	83456100	5.48	11	PROMOTER	12.7219	chr4:83455975-83456225	chr4	83455975	83456225	[9.7, 12.72193]	45	+	83456055	MRPS18C	ENST00000507349.5	117	+	83455983	MRPS18C	ENST00000507019.5	135	+	83455965	MRPS18C	ENST00000295491.8	244	-	83455856	HELQ	ENST00000295488.7	277	-	83455823	HELQ	ENST00000510985.1
H929	24600	chr12	38316717	6	12	PROMOTER	10.6812	chr12:38316592-38316842	chr12	38316592	38316842	[10.68116, 3.81]	45	+	38316762	ALG10B	ENST00000551464.1	139	+	38316578	ALG10B	ENST00000308742.8
H929	11082	chr5	34839233	0	0	PROMOTER	7.62932	chr5:34839108-34839358	chr5	34839108	34839358	[7.62932]	45	-	34839278	CTD-2517O10.6	ENST00000606401.1	69	+	34839164	TTC23L	ENST00000638320.1:ENST00000505624.5	1439	+	34840672	TTC23L	ENST00000610313.1
H929	4602	chr2	73071791	0	0	PROMOTER	6.84347	chr2:73071666-73071916	chr2	73071666	73071916	[6.84347]	45	-	73071836	SFXN5	ENST00000272433.6	67	-	73071724	SFXN5	ENST00000410065.5
H929	15514	chr6	131628274	0	0	PROMOTER	6.8041	chr6:131628149-131628399	chr6	131628149	131628399	[6.8041]	45	-	131628229	MED23	ENST00000368068.7:ENST00000368060.7	69	-	131628205	MED23	ENST00000354577.8	75	-	131628199	MED23	ENST00000368053.8	187	+	131628461	ENPP3	ENST00000414305.5	208	-	131628066	MED23	ENST00000368058.5	214	-	131628060	MED23	ENST00000539158.1
H929	31130	chr20	1325752	0	0	PROMOTER	5.99645	chr20:1325627-1325877	chr20	1325627	1325877	[5.99645]	45	-	1325707	SDCBP2	ENST00000381812.5	117	-	1325869	SDCBP2	ENST00000339987.7	331	+	1325421	RP11-314N13.4	ENST00000446423.1	333	+	1325419	RP11-314N13.4	ENST00000607947.1	342	+	1325410	RP11-314N13.4	ENST00000609470.5
H929	29046	chr17	56914083	48.41	109	PROMOTER	5.18	chr17:56913958-56914208	chr17	56913958	56914208	[4.07, 4.28337, 5.18]	45	-	56914038	TRIM25	ENST00000316881.8	51	-	56914032	TRIM25	ENST00000537230.2	103	+	56914186	RP11-670E13.6	ENST00000619432.1
H929	27537	chr15	92900381	4.47	9	PROMOTER	20.9533	chr15:92900256-92900506	chr15	92900256	92900506	[8.86, 20.95325]	46	+	92900335	CHD2	ENST00000420239.6	57	+	92900324	CHD2	ENST00000628375.2:ENST00000629346.2	60	+	92900321	CHD2	ENST00000627622.1	61	+	92900320	CHD2	ENST00000394196.8	192	+	92900189	CHD2	ENST00000626874.2
H929	16264	chr7	35800652	0	0	PROMOTER	13.518	chr7:35800527-35800777	chr7	35800527	35800777	[13.518]	46	-	35800606	AC007551.3	ENST00000437235.7	64	-	35800588	AC007551.3	ENST00000412856.5	280	+	35800932	2007-09-01	ENST00000399034.7	334	+	35800986	2007-09-01	ENST00000350320.10	387	+	35801039	2007-09-01	ENST00000435235.6
H929	383	chr1	28648646	3.46	7	PROMOTER	12.4788	chr1:28648521-28648771	chr1	28648521	28648771	[9.99, 12.47883]	46	+	28648600	RNU11	ENST00000602813.1:ENST00000387069.1
H929	25292	chr12	108561446	2	4	PROMOTER	10.1487	chr12:108561321-108561571	chr12	108561321	108561571	[10.14867, 3.45]	46	-	108561400	SART3	ENST00000546611.1	57	-	108561389	SART3	ENST00000228284.7	287	-	108561159	SART3	ENST00000431469.6	1155	+	108562601	ISCU	ENST00000535729.5:ENST00000431221.6:ENST00000547005.5:ENST00000311893.13	1160	+	108562606	ISCU	ENST00000392807.8	1164	+	108562610	ISCU	ENST00000539593.1
H929	23862	chr11	119102188	1.41	3	PROMOTER	9.18581	chr11:119102063-119102313	chr11	119102063	119102313	[9.18581, 7.69]	46	-	119102142	DPAGT1	ENST00000354202.8	351	-	119101837	DPAGT1	ENST00000639704.1
H929	29090	chr17	58692674	0	0	PROMOTER	7.49674	chr17:58692549-58692799	chr17	58692549	58692799	[7.49674]	46	+	58692628	RAD51C	ENST00000421782.3	101	+	58692573	RAD51C	ENST00000583539.5:ENST00000337432.8	619	-	58692055	TEX14	ENST00000389934.7	651	-	58692023	TEX14	ENST00000240361.12:ENST00000349033.9	656	-	58692018	CTD-2200P10.1	ENST00000583666.2
H929	1543	chr1	154975739	0	0	PROMOTER	6.31426	chr1:154975614-154975864	chr1	154975614	154975864	[6.31426]	46	+	154975693	MIR4258	ENST00000580920.1	1040	+	154974699	CKS1B	ENST00000308987.5	1056	+	154974683	CKS1B	ENST00000368436.1	1086	+	154974653	CKS1B	ENST00000368439.5	1363	-	154974376	SHC1	ENST00000368450.5:ENST00000368453.8
H929	31127	chr20	1118552	5.48	11	PROMOTER	5.07554	chr20:1118427-1118677	chr20	1118427	1118677	[5.07554, 2.19]	46	+	1118598	PSMF1	ENST00000246015.8:ENST00000335877.10	102	-	1118450	RP4-545L17.11	ENST00000620712.1
H929	31094	chr19	54532713	4.47	9	PROMOTER	39.055	chr19:54532588-54532838	chr19	54532588	54532838	[39.05496, 14.2]	47	+	54532760	KIR3DX1	ENST00000610811.4
H929	26172	chr14	60734715	5	10	PROMOTER	28.3888	chr14:60734590-60734840	chr14	60734590	60734840	[28.3888, 9.17]	47	+	60734762	MNAT1	ENST00000261245.8	61	+	60734776	MNAT1	ENST00000539616.6
H929	28921	chr17	45148549	40.15	94	PROMOTER	23.8518	chr17:45148424-45148674	chr17	45148424	45148674	[17.29, 23.85185, 3.88]	47	+	45148502	HEXIM1	ENST00000332499.3	79	-	45148470	AC142472.6	ENST00000612013.1
H929	3065	chr1	209756096	2.45	5	PROMOTER	13.3044	chr1:209755971-209756221	chr1	209755971	209756221	[13.30438, 4.39]	47	+	209756049	TRAF3IP3	ENST00000367025.7	64	+	209756032	TRAF3IP3	ENST00000400959.7	83	+	209756179	TRAF3IP3	ENST00000367026.7
H929	11027	chr5	32531771	0	0	PROMOTER	12.1191	chr5:32531646-32531896	chr5	32531646	32531896	[12.11908]	47	+	32531818	SUB1	ENST00000512913.5	138	+	32531633	SUB1	ENST00000506237.5
H929	1615	chr1	156816787	1.41	3	PROMOTER	11.5759	chr1:156816662-156816912	chr1	156816662	156816912	[11.5759, 10.16]	47	-	156816834	SH2D2A	ENST00000368198.7	61	-	156816848	SH2D2A	ENST00000392306.2	75	-	156816862	SH2D2A	ENST00000368199.7	1131	+	156815656	NTRK1	ENST00000392302.6
H929	14873	chr6	73521079	59.16	126	PROMOTER	11.3	chr6:73520954-73521204	chr6	73520954	73521204	[3.33, 10.86832, 11.3]	47	-	73521032	EEF1A1	ENST00000610520.4:ENST00000615060.4	61	-	73521018	EEF1A1	ENST00000316292.13	509	-	73521588	EEF1A1	ENST00000309268.10	642	-	73521721	EEF1A1	ENST00000331523.6
H929	593	chr1	46616418	0	0	PROMOTER	7.98188	chr1:46616293-46616543	chr1	46616293	46616543	[7.98188]	47	-	46616465	MOB3C	ENST00000371940.1	473	-	46616891	MOB3C	ENST00000319928.7	1285	-	46615133	MOB3C	ENST00000271139.12
H929	5024	chr2	121530929	2.45	5	PROMOTER	21.8463	chr2:121530804-121531054	chr2	121530804	121531054	[21.84632, 10.7]	48	+	121530881	RNU4ATAC	ENST00000580972.1	507	+	121530422	RP11-204L24.2	ENST00000577914.1
H929	24420	chr12	6970703	3	6	PROMOTER	16.8147	chr12:6970578-6970828	chr12	6970578	6970828	[16.81467, 7.88]	48	-	6970751	PHB2	ENST00000546111.5	50	-	6970753	PHB2	ENST00000440277.5	54	-	6970649	PHB2	ENST00000542912.5	80	-	6970623	PHB2	ENST00000399433.6	122	-	6970825	PHB2	ENST00000535923.5	190	+	6970893	EMG1	ENST00000599672.5	218	+	6970921	RP3-461F17.3	ENST00000607161.5
H929	14227	chr6	26056380	2	4	PROMOTER	14.9975	chr6:26056255-26056505	chr6	26056255	26056505	[13.03, 14.99747]	48	-	26056428	HIST1H1C	ENST00000343677.3
H929	7772	chr3	128153406	0	0	PROMOTER	12.0132	chr3:128153281-128153531	chr3	128153281	128153531	[12.01323]	48	+	128153454	EEFSEC	ENST00000254730.10	95	+	128153501	EEFSEC	ENST00000483457.1	508	-	128153914	RUVBL1	ENST00000464873.5
H929	23861	chr11	119101885	5.48	11	PROMOTER	11.6334	chr11:119101760-119102010	chr11	119101760	119102010	[4.01, 11.63342]	48	-	119101837	DPAGT1	ENST00000639704.1	257	-	119102142	DPAGT1	ENST00000354202.8
H929	21709	chr10	89302094	0	0	PROMOTER	5.59729	chr10:89301969-89302219	chr10	89301969	89302219	[5.59729]	48	+	89302046	IFIT2	ENST00000611722.1	139	+	89301955	IFIT2	ENST00000371826.3
H929	25503	chr12	122974655	0	0	PROMOTER	5.34262	chr12:122974530-122974780	chr12	122974530	122974780	[5.34262]	48	+	122974703	OGFOD2	ENST00000538755.5	72	+	122974727	OGFOD2	ENST00000536150.5	75	+	122974580	OGFOD2	ENST00000397389.6	97	+	122974752	OGFOD2	ENST00000538628.5:ENST00000545612.5	162	+	122974817	OGFOD2	ENST00000545317.5	316	+	122974971	OGFOD2	ENST00000454694.6	550	-	122975205	ABCB9	ENST00000392439.7:ENST00000442028.6	565	+
H929	14422	chr6	30742977	0	0	PROMOTER	5.06753	chr6:30742852-30743102	chr6	30742852	30743102	[5.06753]	48	+	30742929	XXbac-BPG252P9.10	ENST00000607333.1	244	-	30742733	FLOT1	ENST00000376389.7	1571	-	30744548	IER3	ENST00000376377.2	1577	-	30744554	IER3	ENST00000259874.5
H929	7146	chr3	63864608	0	0	PROMOTER	5.06748	chr3:63864483-63864733	chr3	63864483	63864733	[5.06748]	48	+	63864560	RP11-245J9.9	ENST00000295900.10	51	+	63864557	RP11-245J9.9	ENST00000474112.5	705	-	63863903	THOC7	ENST00000295899.9	740	-	63863868	THOC7	ENST00000469584.5	1449	+	63863159	RP11-245J9.8	ENST00000647117.1
H929	1391	chr1	151070555	0	1	PROMOTER	38.88	chr1:151070430-151070680	chr1	151070430	151070680	[19.4506, 38.88]	49	+	151070604	GABPB2	ENST00000368918.7	230	-	151070325	CDC42SE1	ENST00000439374.6
H929	30715	chr19	15419103	5	10	PROMOTER	33.7828	chr19:15418978-15419228	chr19	15418978	15419228	[33.78277, 10.31]	49	-	15419054	AKAP8L	ENST00000397410.9	77	-	15419026	AKAP8L	ENST00000595465.6
H929	26956	chr15	42274193	0	1	PROMOTER	23.8961	chr15:42274068-42274318	chr15	42274068	42274318	[6.25, 23.89615]	49	+	42274242	GANC	ENST00000318010.12:ENST00000440615.6	530	-	42273663	TMEM87A	ENST00000389834.8	535	+	42273658	GANC	ENST00000566442.5	609	-	42273584	TMEM87A	ENST00000448392.5	757	-	42273436	TMEM87A	ENST00000307216.10	1115	-	42273078	TMEM87A	ENST00000568432.1
H929	33260	chrX	155881244	0	0	PROMOTER	18.808	chrX:155881119-155881369	chrX	155881119	155881369	[18.80795]	49	+	155881293	VAMP7	ENST00000286448.11	131	+	155881375	VAMP7	ENST00000262640.11	134	+	155881378	VAMP7	ENST00000460621.6
H929	462	chr1	36464388	0	0	PROMOTER	15.8677	chr1:36464263-36464513	chr1	36464263	36464513	[15.86774]	49	-	36464437	MRPS15	ENST00000373116.5
H929	5794	chr2	196799750	1.41	3	PROMOTER	14.0968	chr2:196799625-196799875	chr2	196799625	196799875	[14.09683, 8.39]	49	-	196799701	GTF3C3	ENST00000263956.7	91	-	196799659	GTF3C3	ENST00000409364.3
H929	20221	chr9	75890595	0	0	PROMOTER	9.86053	chr9:75890470-75890720	chr9	75890470	75890720	[9.86053]	49	+	75890644	PCSK5	ENST00000545128.5	75	+	75890670	PCSK5	ENST00000376767.7	110	+	75890705	PCSK5	ENST00000376752.8
H929	968	chr1	109090809	98.5	197	PROMOTER	8.58605	chr1:109090684-109090934	chr1	109090684	109090934	[8.58605, 2.6]	49	-	109090858	RP5-1065J22.8	ENST00000608574.1	1006	+	109089803	TMEM167B	ENST00000338272.8
H929	14244	chr6	26204503	8	16	PROMOTER	7.80117	chr6:26204378-26204628	chr6	26204378	26204628	[2.37, 7.80117]	49	+	26204552	HIST1H4E	ENST00000615164.2
H929	1133	chr1	120176466	2	4	PROMOTER	7.33568	chr1:120176341-120176591	chr1	120176341	120176591	[7.33568, 3.0]	49	-	120176515	SEC22B	ENST00000578049.3
H929	31038	chr19	48810867	0	0	PROMOTER	6.84445	chr19:48810742-48810992	chr19	48810742	48810992	[6.84445]	49	-	48810916	BCAT2	ENST00000597011.5	145	-	48811012	BCAT2	ENST00000545387.6	153	-	48811020	BCAT2	ENST00000316273.10	160	-	48811027	BCAT2	ENST00000402551.5:ENST00000598162.5	162	-	48811029	BCAT2	ENST00000599246.5
H929	28526	chr17	5468965	0	0	PROMOTER	5.07554	chr17:5468840-5469090	chr17	5468840	5469090	[5.07554]	49	-	5468916	DHX33	ENST00000433302.7	95	-	5469060	DHX33	ENST00000225296.7	127	+	5469092	CTC-524C5.5	ENST00000571506.1
H929	25544	chr12	125150008	7	14	PROMOTER	16.5875	chr12:125149883-125150133	chr12	125149883	125150133	[16.58752, 8.88]	50	+	125150058	RP11-158L12.5	ENST00000543922.1
H929	8294	chr3	172750776	0	0	PROMOTER	10.3912	chr3:172750651-172750901	chr3	172750651	172750901	[10.3912]	50	+	172750726	ECT2	ENST00000417960.5	72	+	172750704	ECT2	ENST00000392692.7	91	+	172750685	ECT2	ENST00000540509.5	94	+	172750682	ECT2	ENST00000232458.9
H929	25477	chr12	121888681	95.5	191	PROMOTER	8.83589	chr12:121888556-121888806	chr12	121888556	121888806	[3.96662, 8.83589]	50	+	121888731	PSMD9	ENST00000541212.5	90	+	121888771	PSMD9	ENST00000261817.6	105	+	121888786	PSMD9	ENST00000542602.1	128	+	121888809	RP11-87C12.2	ENST00000546333.1
H929	15894	chr6	157830623	6.48	13	PROMOTER	8.25808	chr6:157830498-157830748	chr6	157830498	157830748	[8.25808, 4.51]	50	-	157830573	RP11-52J3.3	ENST00000411838.1
H929	14639	chr6	45422435	11.49	23	PROMOTER	6.11	chr6:45422310-45422560	chr6	45422310	45422560	[2.83995, 6.11]	50	+	45422485	RUNX2	ENST00000359524.7	142	+	45422577	RUNX2	ENST00000625924.1	430	-	45422005	RP1-244F24.1	ENST00000606796.1
H929	9551	chr4	101790679	2	4	PROMOTER	47.4936	chr4:101790554-101790804	chr4	101790554	101790804	[47.49363, 15.74]	51	+	101790730	BANK1	ENST00000508653.5	72	+	101790607	BANK1	ENST00000322953.8:ENST00000428908.5
H929	22753	chr11	59616093	1	2	PROMOTER	28.4392	chr11:59615968-59616218	chr11	59615968	59616218	[16.93, 28.43916]	51	-	59616144	OSBP	ENST00000263847.5	336	+	59616429	AP000442.1	ENST00000531108.1
H929	5408	chr2	165794733	1	2	PROMOTER	20.9745	chr2:165794608-165794858	chr2	165794608	165794858	[8.57, 20.97452]	51	-	165794682	GALNT3	ENST00000392701.7	118	+	165794851	AC009495.2	ENST00000425688.1
H929	16657	chr7	77798631	70.62	155	PROMOTER	17.3349	chr7:77798506-77798756	chr7	77798506	77798756	[8.35, 7.41, 17.33495]	51	-	77798580	TMEM60	ENST00000257663.3	161	+	77798792	PHTF2	ENST00000416283.6	174	+	77798805	PHTF2	ENST00000422959.6:ENST00000307305.12	182	+	77798813	PHTF2	ENST00000424760.5	257	+	77798888	PHTF2	ENST00000415251.6	270	+	77798901	PHTF2	ENST00000275575.11
H929	19779	chr9	2158524	0	0	PROMOTER	9.22241	chr9:2158399-2158649	chr9	2158399	2158649	[9.22241]	51	+	2158473	SMARCA2	ENST00000382186.6	63	+	2158461	SMARCA2	ENST00000417599.6	66	+	2158458	SMARCA2	ENST00000382183.6	68	+	2158456	SMARCA2	ENST00000302401.8	72	+	2158452	SMARCA2	ENST00000382185.6	221	+	2158303	SMARCA2	ENST00000634931.1	841	+	2157683	SMARCA2	ENST00000324954.10	1740	+
H929	18834	chr8	91070072	0	0	PROMOTER	6.24045	chr8:91069947-91070197	chr8	91069947	91070197	[6.24045]	51	-	91070123	OTUD6B-AS1	ENST00000522817.1	117	-	91070189	OTUD6B-AS1	ENST00000524003.1	124	+	91070196	OTUD6B	ENST00000615618.1:ENST00000617869.4:ENST00000285420.8	292	+	91070364	OTUD6B	ENST00000404789.7
H929	6274	chr2	231781736	0	0	PROMOTER	6.08413	chr2:231781611-231781861	chr2	231781611	231781861	[6.08413]	51	+	231781685	COPS7B	ENST00000409091.5	58	+	231781678	COPS7B	ENST00000409295.5	65	+	231781671	COPS7B	ENST00000410024.5:ENST00000611614.4	427	-	231781309	PDE6D	ENST00000287600.8	445	-	231781291	PDE6D	ENST00000409772.5
H929	24057	chr11	125626698	0	0	PROMOTER	5.98835	chr11:125626573-125626823	chr11	125626573	125626823	[5.98835]	51	+	125626749	CHEK1	ENST00000278916.7	140	+	125626558	CHEK1	ENST00000524737.5	357	+	125626341	CHEK1	ENST00000534070.5	721	+	125625977	CHEK1	ENST00000544373.5	724	+	125625974	CHEK1	ENST00000428830.6	972	+	125625726	CHEK1	ENST00000427383.6	1562	+	125625136	CHEK1	ENST00000438015.5:ENST00000532449.5
H929	31140	chr20	2470802	0	0	PROMOTER	5.15355	chr20:2470677-2470927	chr20	2470677	2470927	[5.15355]	51	-	2470853	SNRPB	ENST00000381342.6:ENST00000438552.6
H929	28542	chr17	7242822	0	0	PROMOTER	74.61	chr17:7242697-7242947	chr17	7242697	7242947	[74.61]	52	-	7242770	GABARAP	ENST00000302386.9	375	-	7242447	GABARAP	ENST00000573928.1	570	-	7242252	GABARAP	ENST00000571253.1	622	+	7242200	CTD-2545G14.6	ENST00000624722.1	666	-	7242156	GABARAP	ENST00000571129.5	1003	-	7241819	GABARAP	ENST00000577035.5	1813	-	7244635	CTD-2545G14.7	ENST00000570760.2
H929	22537	chr11	28110260	0	0	PROMOTER	35.484	chr11:28110135-28110385	chr11	28110135	28110385	[13.01, 35.48396]	52	+	28110312	METTL15	ENST00000303459.10	55	+	28110315	METTL15	ENST00000634762.1:ENST00000634721.1	1906	+	28108354	METTL15	ENST00000407364.7	1940	+	28108320	METTL15	ENST00000403099.5	1952	-	28108308	KIF18A	ENST00000263181.6
H929	17721	chr8	28083923	0	0	PROMOTER	21.8405	chr8:28083798-28084048	chr8	28083798	28084048	[5.78, 21.84046]	52	-	28083871	NUGGC	ENST00000413272.6
H929	1345	chr1	150067735	1	2	PROMOTER	13.9942	chr1:150067610-150067860	chr1	150067610	150067860	[13.99417, 13.2]	52	+	150067787	VPS45	ENST00000644510.1	64	+	150067799	VPS45	ENST00000643611.1	67	+	150067668	VPS45	ENST00000611412.4	113	+	150067848	VPS45	ENST00000644526.1	353	+	150067382	VPS45	ENST00000369128.9	423	+	150067312	VPS45	ENST00000369130.7	442	+	150067293	VPS45	ENST00000535106.5	456	+
H929	25677	chr13	30735560	2.45	5	PROMOTER	13.1942	chr13:30735435-30735685	chr13	30735435	30735685	[5.29, 13.19422]	52	+	30735508	ALOX5AP	ENST00000380490.4
H929	1334	chr1	149887027	0	0	PROMOTER	9.78386	chr1:149886902-149887152	chr1	149886902	149887152	[9.78386]	52	+	149886975	HIST2H2AC	ENST00000331380.3	375	-	149886652	HIST2H2BE	ENST00000369155.3	863	+	149887890	BOLA1	ENST00000369153.2	889	-	149887916	HIST2H2AB	ENST00000331128.4
H929	30925	chr19	42397122	0	0	PROMOTER	9.66391	chr19:42396997-42397247	chr19	42396997	42397247	[9.66391]	52	+	42397174	CTB-50E14.6	ENST00000594624.6
H929	24692	chr12	49265134	6	12	PROMOTER	8.96397	chr12:49265009-49265259	chr12	49265009	49265259	[8.96397, 4.61]	52	+	49265082	TUBA1C	ENST00000639419.1	53	+	49265081	TUBA1C	ENST00000549183.1	227	+	49264907	TUBA1C	ENST00000301072.10	378	-	49264756	RP11-977B10.2	ENST00000549023.2
H929	7458	chr3	101827941	0	0	PROMOTER	8.25808	chr3:101827816-101828066	chr3	101827816	101828066	[8.25808]	52	+	101827993	NFKBIZ	ENST00000394054.6
H929	31254	chr20	32277612	0	0	PROMOTER	7.47314	chr20:32277487-32277737	chr20	32277487	32277737	[7.47314]	52	+	32277664	KIF3B	ENST00000375712.3
H929	28473	chr17	1456310	0	0	PROMOTER	6.68158	chr17:1456185-1456435	chr17	1456185	1456435	[6.68158]	52	-	1456258	CRK	ENST00000300574.2	87	-	1456223	CRK	ENST00000398970.5	161	-	1456149	CRK	ENST00000574295.1
H929	22790	chr11	62665370	0	0	PROMOTER	6.42176	chr11:62665245-62665495	chr11	62665245	62665495	[6.42176]	52	+	62665422	SNORA57	ENST00000383870.1	61	+	62665309	CSKMT	ENST00000532971.1	153	-	62665217	C11orf98	ENST00000524958.5	179	-	62665191	C11orf98	ENST00000525675.1	192	-	62665178	RP11-831H9.11	ENST00000528405.1
H929	23854	chr11	119018380	0	0	PROMOTER	5.66413	chr11:119018255-119018505	chr11	119018255	119018505	[5.66413]	52	+	119018432	TRAPPC4	ENST00000533632.5	310	-	119018690	RPS25	ENST00000527673.1	386	+	119018766	TRAPPC4	ENST00000528230.5:ENST00000525303.5:ENST00000434101.6:ENST00000359005.8:ENST00000533058.5	564	+	119018944	MIR3656	ENST00000577421.1
H929	627	chr1	51878989	14	28	PROMOTER	5.38	chr1:51878864-51879114	chr1	51878864	51879114	[3.8408, 5.38]	52	-	51878937	NRDC	ENST00000544028.5	184	-	51878805	NRDC	ENST00000352171.11:ENST00000354831.11	949	-	51878040	NRDC	ENST00000539524.5
H929	25888	chr14	20343355	0	0	PROMOTER	5.22414	chr14:20343230-20343480	chr14	20343230	20343480	[5.22414]	52	-	20343407	RPPH1	ENST00000516869.1	227	+	20343582	PARP2	ENST00000429687.7	260	+	20343615	PARP2	ENST00000250416.9	282	+	20343637	PARP2	ENST00000527915.5	330	-	20343685	RPPH1	ENST00000554988.1
H929	13845	chr6	391792	1.41	3	PROMOTER	23.258	chr6:391667-391917	chr6	391667	391917	[23.25802, 11.68]	53	+	391739	IRF4	ENST00000380956.8
H929	19273	chr8	109063470	4.47	9	PROMOTER	11.0264	chr8:109063345-109063595	chr8	109063345	109063595	[11.02638, 2.28]	53	-	109063417	RP11-1084E5.1	ENST00000522244.1
H929	21829	chr10	96130003	4	8	PROMOTER	9.39193	chr10:96129878-96130128	chr10	96129878	96130128	[9.39193, 6.28]	53	+	96130056	ZNF518A	ENST00000624776.3	288	+	96129715	ZNF518A	ENST00000316045.9
H929	4412	chr2	55232211	0	0	PROMOTER	9.10003	chr2:55232086-55232336	chr2	55232086	55232336	[9.10003]	53	-	55232158	CLHC1	ENST00000407122.5	102	-	55232313	CLHC1	ENST00000401408.5	191	+	55232402	RPS27A	ENST00000272317.10	194	+	55232405	RPS27A	ENST00000639844.1	308	+	55231903	RPS27A	ENST00000402285.7	352	-	55232563	CLHC1	ENST00000406076.5	467	+	55232678	RPS27A	ENST00000404735.1
H929	25088	chr12	93569761	0	0	PROMOTER	5.53495	chr12:93569636-93569886	chr12	93569636	93569886	[5.53495]	53	+	93569814	SOCS2	ENST00000340600.6	638	+	93570399	SOCS2	ENST00000549206.5	1219	+	93570980	SOCS2	ENST00000536696.6	1600	+	93571361	SOCS2	ENST00000549122.5	1637	-	93571398	RP11-887P2.1	ENST00000551626.1	1920	+	93571681	SOCS2	ENST00000622746.4	1943	+	93571704	SOCS2	ENST00000548537.1
H929	31887	chr20	62652133	3.46	7	PROMOTER	5.27474	chr20:62652008-62652258	chr20	62652008	62652258	[5.27474, 5.11]	53	-	62652186	RP11-93B14.10	ENST00000620143.1	1366	-	62650767	RP11-93B14.9	ENST00000617703.1
H929	7886	chr3	139344511	9.49	19	PROMOTER	12.795	chr3:139344386-139344636	chr3	139344386	139344636	[5.23, 12.79503]	54	+	139344565	MRPS22	ENST00000478464.5	484	+	139344027	MRPS22	ENST00000465056.5	492	+	139344019	MRPS22	ENST00000310776.8
H929	26197	chr14	63642089	3	6	PROMOTER	12.1192	chr14:63641964-63642214	chr14	63641964	63642214	[6.18, 12.11925]	54	+	63642143	CTD-2302E22.6	ENST00000620835.1	228	-	63641861	WDR89	ENST00000394942.2	682	-	63641407	WDR89	ENST00000267522.7
H929	28576	chr17	8288443	0	0	PROMOTER	10.8683	chr17:8288318-8288568	chr17	8288318	8288568	[10.86832]	54	+	8288497	RANGRF	ENST00000226105.10	211	+	8288654	RANGRF	ENST00000407006.8	228	+	8288671	RANGRF	ENST00000580434.5	235	+	8288678	RANGRF	ENST00000439238.3
H929	22698	chr11	46700764	0	0	PROMOTER	7.39054	chr11:46700639-46700889	chr11	46700639	46700889	[7.39054]	54	+	46700818	ZNF408	ENST00000311764.2	165	-	46700599	ARHGAP1	ENST00000311956.8
H929	24681	chr12	48106362	0	1	PROMOTER	7.14927	chr12:48106237-48106487	chr12	48106237	48106487	[4.98, 7.14927]	54	-	48106308	SENP1	ENST00000549518.5	244	+	48106118	PFKM	ENST00000642730.1	451	+	48105911	PFKM	ENST00000549941.6	489	+	48105873	PFKM	ENST00000340802.11	554	-	48105808	SENP1	ENST00000448372.5	741	+	48105621	PFKM	ENST00000550924.6	1223	+	48105139	PFKM	ENST00000550345.6
H929	30780	chr19	23395615	3.46	7	PROMOTER	26.166	chr19:23395490-23395740	chr19	23395490	23395740	[9.49, 26.166]	55	-	23395560	ZNF91	ENST00000300619.11	158	-	23395457	ZNF91	ENST00000599743.5	169	-	23395446	ZNF91	ENST00000397082.2
H929	32530	chrM	522	0	0	PROMOTER	14.8413	chrM:397-647	chrM	397	647	[14.84131]	55	+	577	MT-TF	ENST00000387314.1	126	+	648	MT-RNR1	ENST00000389680.2	1080	+	1602	MT-TV	ENST00000387342.1	1149	+	1671	MT-RNR2	ENST00000387347.2
H929	29389	chr17	80544822	3.46	7	PROMOTER	13.5002	chr17:80544697-80544947	chr17	80544697	80544947	[13.50019, 3.11]	55	+	80544877	RPTOR	ENST00000570891.5	446	+	80545268	RPTOR	ENST00000306801.7	646	+	80545468	RPTOR	ENST00000544334.6
H929	1606	chr1	156677452	11.49	23	PROMOTER	12.0013	chr1:156677327-156677577	chr1	156677327	156677577	[9.74, 12.00132]	55	-	156677397	NES	ENST00000368223.3
H929	9248	chr4	76148452	0	0	PROMOTER	9.8466	chr4:76148327-76148577	chr4	76148327	76148577	[9.8466]	55	-	76148397	NUP54	ENST00000514987.5	63	-	76148515	NUP54	ENST00000264883.7
H929	15058	chr6	90296963	0	0	PROMOTER	9.27378	chr6:90296838-90297088	chr6	90296838	90297088	[9.27378]	55	-	90296908	BACH2	ENST00000537989.5	221	-	90296742	BACH2	ENST00000257749.8:ENST00000343122.7
H929	20296	chr9	83980853	0	0	PROMOTER	8.21714	chr9:83980728-83980978	chr9	83980728	83980978	[8.21714]	55	+	83980798	RMI1	ENST00000325875.7	249	-	83980604	HNRNPK	ENST00000376281.8	584	-	83980269	HNRNPK	ENST00000376263.7	603	-	83980250	HNRNPK	ENST00000360384.9
H929	14408	chr6	30516321	6	12	PROMOTER	7.37341	chr6:30516196-30516446	chr6	30516196	30516446	[2.65, 7.37341]	55	+	30516266	XXbac-BPG249D20.9	ENST00000415195.1
H929	8521	chr3	194672532	0	0	PROMOTER	7.14927	chr3:194672407-194672657	chr3	194672407	194672657	[7.14927]	55	-	194672477	LSG1	ENST00000265245.9
H929	20831	chr9	128067377	76.86	165	PROMOTER	58.5737	chr9:128067252-128067502	chr9	128067252	128067502	[58.57365, 49.66, 36.05]	56	-	128067321	NAIF1	ENST00000373078.4	824	+	128068201	SLC25A25	ENST00000373068.6	916	+	128068293	SLC25A25	ENST00000373069.9
H929	31338	chr20	36051016	0	0	PROMOTER	10.4314	chr20:36050891-36051141	chr20	36050891	36051141	[10.43143]	56	-	36050960	NORAD	ENST00000565493.1
H929	1337	chr1	149899541	0	0	PROMOTER	9.29033	chr1:149899416-149899666	chr1	149899416	149899666	[9.29033]	56	+	149899597	BOLA1	ENST00000369152.5	85	+	149899626	BOLA1	ENST00000369150.1
H929	28992	chr17	49708390	0	0	PROMOTER	7.14927	chr17:49708265-49708515	chr17	49708265	49708515	[7.14927]	56	+	49708334	RP11-613C6.2	ENST00000512720.1	191	-	49708199	SLC35B1	ENST00000240333.10
H929	13144	chr5	146447256	0	0	PROMOTER	6.82431	chr5:146447131-146447381	chr5	146447131	146447381	[6.82431]	56	+	146447312	TCERG1	ENST00000296702.9	76	+	146447332	TCERG1	ENST00000394421.6
H929	24050	chr11	125164763	3	6	PROMOTER	40.0464	chr11:125164638-125164888	chr11	125164638	125164888	[14.23, 40.04638]	57	+	125164706	PKNOX2	ENST00000298282.13	154	-	125164609	RP11-687M24.5	ENST00000532316.1
H929	1261	chr1	147172714	0	0	PROMOTER	10.4177	chr1:147172589-147172839	chr1	147172589	147172839	[10.41771]	57	+	147172771	RP11-337C18.8	ENST00000440377.2	170	-	147172544	PRKAB2	ENST00000254101.3	472	+	147173186	RP11-337C18.10	ENST00000606856.1	658	+	147173372	RP11-337C18.8	ENST00000607149.1	671	+	147173385	RP11-337C18.8	ENST00000606757.1
H929	31324	chr20	35454689	3.46	7	PROMOTER	10.4012	chr20:35454564-35454814	chr20	35454564	35454814	[3.16, 10.40125]	57	-	35454746	GDF5	ENST00000374372.1	592	-	35454097	MIR1289-1	ENST00000408836.1	640	+	35455329	CEP250	ENST00000397527.5	1035	+	35455724	CEP250	ENST00000397524.5
H929	11560	chr5	65563296	3.46	7	PROMOTER	6.03541	chr5:65563171-65563421	chr5	65563171	65563421	[2.93, 6.03541]	57	+	65563239	PPWD1	ENST00000535264.5:ENST00000538977.5:ENST00000261308.9	125	-	65563171	CENPK	ENST00000396679.5	128	-	65563168	CENPK	ENST00000514814.5	151	-	65563145	CENPK	ENST00000510693.5	171	-	65563125	CENPK	ENST00000508421.5	1732	-	65561564	CENPK	ENST00000510354.1
H929	11563	chr5	65624977	0	0	PROMOTER	6.00747	chr5:65624852-65625102	chr5	65624852	65625102	[6.00747]	57	+	65625034	TRAPPC13	ENST00000438419.6	63	+	65625040	TRAPPC13	ENST00000231526.8	68	+	65625045	TRAPPC13	ENST00000505553.5	212	+	65624765	SHLD3	ENST00000510585.2	261	+	65624716	TRAPPC13	ENST00000399438.7	331	-	65624646	TRIM23	ENST00000231524.13	678	-	65624299	TRIM23	ENST00000274327.11	681	-
H929	9728	chr4	121216684	1	2	PROMOTER	5.59729	chr4:121216559-121216809	chr4	121216559	121216809	[3.84, 5.59729]	57	-	121216627	TNIP3	ENST00000507879.5
H929	13240	chr5	150905040	0	1	PROMOTER	5.34262	chr5:150904915-150905165	chr5	150904915	150905165	[4.0, 5.34262]	57	-	150904983	ZNF300	ENST00000274599.9:ENST00000418587.6:ENST00000446148.6	62	-	150904978	ZNF300	ENST00000394226.2	251	-	150904789	ZNF300	ENST00000427179.5
H929	30857	chr19	39391254	6.48	13	PROMOTER	5.18	chr19:39391129-39391379	chr19	39391129	39391379	[5.01591, 5.18]	57	+	39391311	MED29	ENST00000315588.9	59	-	39391195	PAF1	ENST00000221265.7	69	+	39391323	MED29	ENST00000615911.4	100	-	39391154	PAF1	ENST00000595564.5	139	+	39391393	MED29	ENST00000594368.5	142	+	39391396	MED29	ENST00000599213.6
H929	31071	chr19	50415857	0	1	PROMOTER	34.4127	chr19:50415732-50415982	chr19	50415732	50415982	[15.7, 34.4127]	58	+	50415799	CTD-2545M3.6	ENST00000599632.1
H929	31846	chr20	58651195	7.48	15	PROMOTER	23.6453	chr20:58651070-58651320	chr20	58651070	58651320	[11.08, 23.64529]	58	+	58651253	STX16	ENST00000361830.7	77	+	58651272	STX16	ENST00000355957.9	88	+	58651283	STX16	ENST00000359617.8:ENST00000371141.8	239	+	58651434	STX16-NPEPL1	ENST00000530122.1	410	+	58651605	STX16	ENST00000371132.8	684	+	58651879	STX16	ENST00000358029.8
H929	20719	chr9	117704332	1	2	PROMOTER	14.9975	chr9:117704207-117704457	chr9	117704207	117704457	[14.99747, 9.66]	58	+	117704390	RP11-281A20.3	ENST00000646089.1	71	+	117704403	TLR4	ENST00000355622.7	110	+	117704222	TLR4	ENST00000645071.1	140	+	117704192	TLR4	ENST00000394487.5	157	+	117704175	TLR4	ENST00000472304.2
H929	10697	chr5	10250283	0	0	PROMOTER	12.4464	chr5:10250158-10250408	chr5	10250158	10250408	[12.44639]	58	+	10250341	CCT5	ENST00000625723.1	67	+	10250216	CCT5	ENST00000515390.5	254	+	10250537	CCT5	ENST00000515676.5	256	+	10250539	CCT5	ENST00000506600.1	354	+	10249929	CCT5	ENST00000503026.5	362	+	10249921	CCT5	ENST00000280326.8	386	-	10249897	FAM173B	ENST00000510047.5	387	-
H929	3105	chr1	211382745	1.41	3	PROMOTER	12.1519	chr1:211382620-211382870	chr1	211382620	211382870	[12.15189, 9.48]	58	+	211382803	LINC00467	ENST00000423222.5
H929	4414	chr2	55419953	0	0	PROMOTER	10.4314	chr2:55419828-55420078	chr2	55419828	55420078	[10.43143]	58	-	55419895	CCDC88A	ENST00000645072.1	65	-	55419888	CCDC88A	ENST00000263630.13:ENST00000436346.6	75	-	55419878	CCDC88A	ENST00000413716.7:ENST00000642200.1	103	-	55419850	CCDC88A	ENST00000471947.2	158	-	55419795	CCDC88A	ENST00000645477.1	340	-	55419613	CCDC88A	ENST00000336838.10:ENST00000621814.4	370	-	55419583	CCDC88A	ENST00000647401.1	677	-
H929	25046	chr12	89524864	0	0	PROMOTER	9.03356	chr12:89524739-89524989	chr12	89524739	89524989	[9.03356]	58	-	89524806	GALNT4	ENST00000529983.2	341	-	89525205	POC1B	ENST00000549504.1	699	-	89525563	POC1B	ENST00000549035.1	751	-	89525615	POC1B	ENST00000393179.8	790	+	89525654	RP11-734K2.4	ENST00000605233.2	1160	-	89526024	POC1B	ENST00000313546.7	1334	-	89526198	POC1B-GALNT4	ENST00000548729.5	1398	-
H929	28507	chr17	3846309	0	0	PROMOTER	7.7626	chr17:3846184-3846434	chr17	3846184	3846434	[7.7626]	58	-	3846251	NCBP3	ENST00000389005.5
H929	17118	chr7	129055035	115.5	231	PROMOTER	5.64936	chr7:129054910-129055160	chr7	129054910	129055160	[4.94537, 5.64936]	58	-	129055093	TNPO3	ENST00000482320.5	109	-	129055144	TNPO3	ENST00000471234.5	121	-	129054914	TNPO3	ENST00000265388.9	138	-	129055173	TNPO3	ENST00000627585.2	152	-	129054883	TNPO3	ENST00000471166.1
H929	31561	chr20	46406691	5.48	11	PROMOTER	76.7369	chr20:46406566-46406816	chr20	46406566	46406816	[76.73687, 48.47]	59	-	46406632	ELMO2	ENST00000396391.5	74	-	46406617	ELMO2	ENST00000290246.10	132	-	46406559	ELMO2	ENST00000372176.5
H929	9548	chr4	101347721	0	0	PROMOTER	23.9743	chr4:101347596-101347846	chr4	101347596	101347846	[23.97433]	59	+	101347780	AP001816.1	ENST00000527564.1	241	-	101347480	PPP3CA	ENST00000394854.7	244	-	101347477	PPP3CA	ENST00000512215.5	250	-	101347471	PPP3CA	ENST00000323055.10	394	-	101347327	PPP3CA	ENST00000394853.8	879	-	101346842	PPP3CA	ENST00000507176.5
H929	33066	chrX	132218183	6	12	PROMOTER	23.2338	chrX:132218058-132218308	chrX	132218058	132218308	[23.2338, 5.87]	59	-	132218124	RAP2C	ENST00000342983.6	324	+	132218507	RP5-842K24.2	ENST00000441399.2	1250	-	132219433	RAP2C	ENST00000370874.1	1297	-	132219480	RAP2C	ENST00000620646.4
H929	31013	chr19	48255734	5.48	11	PROMOTER	21.9345	chr19:48255609-48255859	chr19	48255609	48255859	[21.93453, 9.3]	59	+	48255675	CTC-241F20.3	ENST00000602172.1	152	-	48255886	CARD8	ENST00000520753.5	155	-	48255889	CARD8	ENST00000519940.5	159	-	48255893	CARD8	ENST00000519332.5	164	-	48255898	CARD8	ENST00000520007.5	212	-	48255946	CARD8	ENST00000521613.5
H929	27485	chr15	89894053	5.48	11	PROMOTER	21.3422	chr15:89893928-89894178	chr15	89893928	89894178	[9.86, 21.34217]	59	-	89893994	AP3S2	ENST00000558011.5	72	-	89893981	AP3S2	ENST00000560940.5	289	-	89894342	AP3S2	ENST00000336418.8	585	-	89894638	AP3S2	ENST00000617003.1
H929	2241	chr1	169894018	24.54	60	PROMOTER	12.4464	chr1:169893893-169894143	chr1	169893893	169894143	[7.28, 12.44639, 6.22]	59	-	169893959	SCYL3	ENST00000367772.8	66	-	169893952	SCYL3	ENST00000367771.10
H929	1047	chr1	113871818	12.49	25	PROMOTER	8.25481	chr1:113871693-113871943	chr1	113871693	113871943	[3.39, 8.25481]	59	-	113871759	PTPN22	ENST00000359785.9	65	-	113871753	PTPN22	ENST00000538253.5	106	-	113871712	PTPN22	ENST00000460620.5:ENST00000420377.6:ENST00000525799.1	120	-	113871698	PTPN22	ENST00000528414.5
H929	425	chr1	32817383	0	0	PROMOTER	5.32732	chr1:32817258-32817508	chr1	32817258	32817508	[5.32732]	59	+	32817442	S100PBP	ENST00000373476.5	139	-	32817244	YARS	ENST00000616261.1	172	+	32817555	S100PBP	ENST00000373475.9	770	-	32818153	YARS	ENST00000373477.8
H929	21788	chr10	93482376	0	0	PROMOTER	5.03291	chr10:93482251-93482501	chr10	93482251	93482501	[5.03291]	59	-	93482317	MYOF	ENST00000371489.5	182	-	93482194	MYOF	ENST00000358334.9:ENST00000359263.8:ENST00000371488.3
H929	23205	chr11	95789731	0	0	PROMOTER	14.2601	chr11:95789606-95789856	chr11	95789606	95789856	[14.26014]	60	-	95789791	FAM76B	ENST00000358780.9	170	-	95789561	FAM76B	ENST00000536839.1	234	+	95789965	CEP57	ENST00000537677.5	730	+	95790461	CEP57	ENST00000325486.9:ENST00000325542.9	928	+	95790659	CEP57	ENST00000538658.5
H929	25366	chr12	112906947	0	0	PROMOTER	13.6555	chr12:112906822-112907072	chr12	112906822	112907072	[13.65547]	60	+	112907007	OAS1	ENST00000551241.5	91	+	112907038	OAS1	ENST00000553185.1	97	+	112906850	OAS1	ENST00000452357.6	164	+	112906783	OAS1	ENST00000445409.6	170	+	112906777	OAS1	ENST00000202917.9
H929	9386	chr4	86360162	5	10	PROMOTER	13.2673	chr4:86360037-86360287	chr4	86360037	86360287	[13.26732, 6.53]	60	-	86360222	MAPK10	ENST00000638225.1:ENST00000641052.1	65	-	86360097	MAPK10	ENST00000641462.1	70	-	86360092	MAPK10	ENST00000395169.9	73	-	86360089	MAPK10	ENST00000641537.1	79	-	86360083	MAPK10	ENST00000641553.1	86	-	86360076	MAPK10	ENST00000639234.1	90	-	86360072	MAPK10	ENST00000641677.1	100	-
H929	15876	chr6	157323541	0	0	PROMOTER	7.40815	chr6:157323416-157323666	chr6	157323416	157323666	[7.40815]	60	-	157323601	TMEM242	ENST00000400788.8:ENST00000367144.4	423	+	157323964	RP5-933K21.3	ENST00000603032.1
H929	3347	chr1	222815124	0	0	PROMOTER	7.12534	chr1:222814999-222815249	chr1	222814999	222815249	[7.12534]	60	+	222815064	RP11-455P21.3	ENST00000495684.2	65	+	222815059	RP11-452F19.3	ENST00000435378.5
H929	1005	chr1	110873094	0	0	PROMOTER	5.59729	chr1:110872969-110873219	chr1	110872969	110873219	[5.59729]	60	+	110873154	CD53	ENST00000271324.5
H929	14483	chr6	33299384	0	0	PROMOTER	5.49705	chr6:33299259-33299509	chr6	33299259	33299509	[5.49705]	60	-	33299324	RGL2	ENST00000497454.5
H929	4619	chr2	74482936	0	0	PROMOTER	5.39889	chr2:74482811-74483061	chr2	74482811	74483061	[5.39889]	60	-	74482996	CCDC142	ENST00000290418.4	151	+	74483087	TTC31	ENST00000442235.6:ENST00000410003.5	153	+	74483089	TTC31	ENST00000233623.9	298	-	74483234	CCDC142	ENST00000393965.7
H929	26283	chr14	70359792	3.46	7	PROMOTER	28.0168	chr14:70359667-70359917	chr14	70359667	70359917	[12.0, 28.01676]	61	-	70359731	COX16	ENST00000389912.6	1100	+	70360892	RNU2-51P	ENST00000410708.1
H929	24908	chr12	68808941	47.87	109	PROMOTER	17	chr12:68808816-68809066	chr12	68808816	68809066	[3.47, 14.15409, 17.0]	61	+	68809002	MDM2	ENST00000539479.6	271	+	68809212	MDM2	ENST00000544561.5:ENST00000299252.8:ENST00000350057.9:ENST00000360430.6:ENST00000393410.5:ENST00000393413.7:ENST00000517852.5:ENST00000545204.1	286	+	68809227	MDM2	ENST00000348801.6:ENST00000478070.1	477	+	68808464	MDM2	ENST00000258148.11	750	+	68808191	MDM2	ENST00000428863.6:ENST00000393412.7	765	+	68808176	MDM2	ENST00000258149.9
H929	2954	chr1	205632023	3.46	7	PROMOTER	15.8677	chr1:205631898-205632148	chr1	205631898	205632148	[15.86774, 5.18]	61	-	205631962	ELK4	ENST00000357992.8:ENST00000289703.8
H929	29775	chr18	45212934	2.45	5	PROMOTER	14.3805	chr18:45212809-45213059	chr18	45212809	45213059	[3.62, 14.38055]	61	+	45212995	SLC14A2	ENST00000586448.5
H929	22432	chr11	15969560	2.45	5	PROMOTER	11.7875	chr11:15969435-15969685	chr11	15969435	15969685	[3.0, 11.7875]	61	-	15969621	MIR6073	ENST00000352083.7
H929	516	chr1	40258168	31	62	PROMOTER	11.6126	chr1:40258043-40258293	chr1	40258043	40258293	[10.57, 11.6126]	61	+	40258107	ZMPSTE24	ENST00000372759.3	201	-	40257967	RP1-39G22.7	ENST00000567508.1
H929	7406	chr3	98981119	0	0	PROMOTER	5.59729	chr3:98980994-98981244	chr3	98980994	98981244	[5.59729]	61	+	98981058	CTD-2021J15.2	ENST00000473756.1
H929	13257	chr5	151786682	0	1	PROMOTER	5.06748	chr5:151786557-151786807	chr5	151786557	151786807	[1.0, 5.06748]	61	+	151786621	G3BP1	ENST00000627077.1
H929	27474	chr15	89088329	5.48	11	PROMOTER	35.507	chr15:89088204-89088454	chr15	89088204	89088454	[10.88, 35.50697]	62	-	89088267	RP11-326A19.3	ENST00000570120.1	101	+	89088430	ABHD2	ENST00000565973.5	179	+	89088150	ABHD2	ENST00000352732.9	388	-	89087941	RP11-326A19.3	ENST00000565547.1
H929	28580	chr17	8630823	0	0	PROMOTER	19.354	chr17:8630698-8630948	chr17	8630698	8630948	[19.35397]	62	-	8630761	MYH10	ENST00000360416.7:ENST00000379980.8:ENST00000269243.8
H929	6985	chr3	50569431	0	0	PROMOTER	12.5755	chr3:50569306-50569556	chr3	50569306	50569556	[12.57552]	62	+	50569493	HEMK1	ENST00000455834.5	234	+	50569197	HEMK1	ENST00000232854.8	279	+	50569152	HEMK1	ENST00000434410.5	1560	-	50570991	C3orf18	ENST00000449241.5	1680	-	50567751	C3orf18	ENST00000357203.7	1755	-	50567676	C3orf18	ENST00000441239.5	1766	-	50567665	C3orf18	ENST00000426034.5
H929	30288	chr18	70205720	11	22	PROMOTER	12.5005	chr18:70205595-70205845	chr18	70205595	70205845	[12.50054, 7.03]	62	-	70205658	RTTN	ENST00000255674.11	225	-	70205945	RTTN	ENST00000640769.1
H929	20368	chr9	89498192	0	0	PROMOTER	5.37039	chr9:89498067-89498317	chr9	89498067	89498317	[5.37039]	62	-	89498130	SEMA4D	ENST00000455551.6	103	-	89498089	SEMA4D	ENST00000422704.6	154	-	89498038	SEMA4D	ENST00000339861.8
H929	23351	chr11	102317387	1.41	3	PROMOTER	17.3331	chr11:102317262-102317512	chr11	102317262	102317512	[17.33309, 14.17]	63	+	102317450	BIRC3	ENST00000615299.4	108	+	102317495	BIRC3	ENST00000263464.7	176	+	102317563	BIRC3	ENST00000532808.5
H929	15130	chr6	99425245	5	10	PROMOTER	14.3805	chr6:99425120-99425370	chr6	99425120	99425370	[6.78, 14.38055]	63	-	99425308	PNISR	ENST00000369239.9	86	-	99425331	PNISR	ENST00000438806.5	323	+	99424922	RP11-98I9.4	ENST00000418945.1
H929	30289	chr18	70206008	0	0	PROMOTER	10.4161	chr18:70205883-70206133	chr18	70205883	70206133	[4.66, 10.41612]	63	-	70205945	RTTN	ENST00000640769.1	350	-	70205658	RTTN	ENST00000255674.11
H929	15703	chr6	143449872	0	0	PROMOTER	7.91742	chr6:143449747-143449997	chr6	143449747	143449997	[7.91742]	63	+	143449809	RNA5SP221	ENST00000411271.1	801	-	143450673	ADAT2	ENST00000237283.8	1108	+	143450980	PEX3	ENST00000367591.4
H929	22891	chr11	67428438	0	0	PROMOTER	6.84445	chr11:67428313-67428563	chr11	67428313	67428563	[6.84445]	63	+	67428501	RPS6KB2	ENST00000312629.9
H929	24521	chr12	25250999	0	0	PROMOTER	6.17465	chr12:25250874-25251124	chr12	25250874	25251124	[6.17465]	63	-	25250936	KRAS	ENST00000557334.5	68	-	25250931	KRAS	ENST00000311936.7	70	-	25250929	KRAS	ENST00000556131.1	196	-	25250803	KRAS	ENST00000256078.8
H929	9828	chr4	134327536	0	0	PROMOTER	5.62749	chr4:134327411-134327661	chr4	134327411	134327661	[5.62749]	63	-	134327473	RP11-400D2.2	ENST00000506638.1	87	-	134327449	RP11-400D2.2	ENST00000515491.1
H929	16212	chr7	30390948	0	0	PROMOTER	5.59729	chr7:30390823-30391073	chr7	30390823	30391073	[5.59729]	63	+	30390885	LINC01176	ENST00000628121.1
H929	28957	chr17	47896086	47.39	106	PROMOTER	999	chr17:47895961-47896211	chr17	47895961	47896211	[999.0, 137.40401, 36.26]	64	+	47896150	SP2	ENST00000613139.1:ENST00000376741.4	274	-	47895812	RP11-6N17.4	ENST00000582787.1	317	-	47895769	RP11-6N17.4	ENST00000577279.1
H929	17615	chr8	21919607	11.58	28	PROMOTER	66.9022	chr8:21919482-21919732	chr8	21919482	21919732	[44.08, 66.90218, 29.08]	64	+	21919671	XPO7	ENST00000252512.13
H929	1580	chr1	156154435	79	158	PROMOTER	8.79051	chr1:156154310-156154560	chr1	156154310	156154560	[1.56, 8.79051]	64	+	156154371	SEMA4A	ENST00000368282.1	850	+	156153585	SEMA4A	ENST00000368286.6	857	+	156153578	SEMA4A	ENST00000368284.5	908	+	156153527	SEMA4A	ENST00000368285.7
H929	560	chr1	44213391	0	0	PROMOTER	7.98565	chr1:44213266-44213516	chr1	44213266	44213516	[7.98565]	64	+	44213455	DMAP1	ENST00000361745.10	97	+	44213488	DMAP1	ENST00000315913.9	100	+	44213491	DMAP1	ENST00000372289.6
H929	30997	chr19	47048695	3	6	PROMOTER	239.59	chr19:47048570-47048820	chr19	47048570	47048820	[85.55623, 239.59]	65	-	47048630	TMEM160	ENST00000253047.6
H929	28541	chr17	7242512	16.49	33	PROMOTER	104.74	chr17:7242387-7242637	chr17	7242387	7242637	[100.98479, 104.74]	65	-	7242447	GABARAP	ENST00000573928.1	258	-	7242770	GABARAP	ENST00000302386.9	260	-	7242252	GABARAP	ENST00000571253.1	312	+	7242200	CTD-2545G14.6	ENST00000624722.1	356	-	7242156	GABARAP	ENST00000571129.5	693	-	7241819	GABARAP	ENST00000577035.5
H929	32961	chrX	120036171	3	6	PROMOTER	64.9441	chrX:120036046-120036296	chrX	120036046	120036296	[64.94414, 17.26]	65	+	120036236	RHOXF1-AS1	ENST00000553843.5
H929	28767	chr17	32970441	1.41	3	PROMOTER	14.5814	chr17:32970316-32970566	chr17	32970316	32970566	[1.61, 14.5814]	65	+	32970376	SPACA3	ENST00000580599.5
H929	13207	chr5	149345365	1	2	PROMOTER	12.7338	chr5:149345240-149345490	chr5	149345240	149345490	[12.73375, 4.71]	65	+	149345430	GRPEL2	ENST00000513661.5:ENST00000329271.7	137	+	149345502	GRPEL2	ENST00000416916.2
H929	19093	chr8	101791042	72.08	159	PROMOTER	10.7161	chr8:101790917-101791167	chr8	101790917	101791167	[10.71606, 5.38, 6.02]	65	-	101790977	NCALD	ENST00000522951.5	81	-	101790961	NCALD	ENST00000220931.10
H929	21135	chr10	15720060	2	4	PROMOTER	9.82817	chr10:15719935-15720185	chr10	15719935	15720185	[9.82817, 1.79]	65	-	15720125	ITGA8	ENST00000378076.3
H929	258	chr1	23791122	0	0	PROMOTER	6.03541	chr1:23790997-23791247	chr1	23790997	23791247	[6.03541]	65	+	23791187	LYPLA2	ENST00000374505.6	81	+	23791203	LYPLA2	ENST00000374503.7	99	+	23791221	LYPLA2	ENST00000374502.7	152	+	23790970	LYPLA2	ENST00000374514.7
H929	12987	chr5	139389979	0	0	PROMOTER	5.62749	chr5:139389854-139390104	chr5	139389854	139390104	[5.62749]	65	-	139389914	MZB1	ENST00000302125.8
H929	30624	chr19	10718470	2	4	PROMOTER	39.7899	chr19:10718345-10718595	chr19	10718345	10718595	[39.78989, 9.29]	66	+	10718404	MIR638	ENST00000385237.1	262	+	10718208	DNM2	ENST00000408974.8	307	+	10718163	DNM2	ENST00000355667.10	339	+	10718131	DNM2	ENST00000389253.8	377	+	10718093	DNM2	ENST00000359692.10	391	+	10718079	DNM2	ENST00000585892.5
H929	1520	chr1	154608272	3.46	7	PROMOTER	32.4759	chr1:154608147-154608397	chr1	154608147	154608397	[32.47589, 21.68]	66	-	154608206	ADAR	ENST00000368474.8
H929	581	chr1	45500275	2.45	5	PROMOTER	27.3414	chr1:45500150-45500400	chr1	45500150	45500400	[18.46, 27.34144]	66	+	45500341	MMACHC	ENST00000616135.1	222	+	45500053	MMACHC	ENST00000401061.8	301	-	45499974	CCDC163	ENST00000626657.2:ENST00000629482.2
H929	15919	chr6	159045084	5	10	PROMOTER	12.2525	chr6:159044959-159045209	chr6	159044959	159045209	[12.25248, 2.8]	66	-	159045018	TAGAP	ENST00000338313.5	68	-	159045152	TAGAP	ENST00000326965.7:ENST00000367066.7
H929	7781	chr3	129161114	0	0	PROMOTER	9.76169	chr3:129160989-129161239	chr3	129160989	129161239	[9.76169]	66	-	129161048	ISY1	ENST00000273541.12	77	-	129161037	ISY1	ENST00000393292.7	78	-	129161036	ISY1-RAB43	ENST00000418265.1	179	-	129161293	ISY1	ENST00000393295.7
H929	15821	chr6	153231254	4.47	9	PROMOTER	9.22244	chr6:153231129-153231379	chr6	153231129	153231379	[1.94, 9.22244]	66	+	153231320	RP11-306O13.1	ENST00000392385.2
H929	23598	chr11	111040142	70.74	157	PROMOTER	8.25808	chr11:111040017-111040267	chr11	111040017	111040267	[2.41, 8.25808, 3.21]	66	-	111040208	RNA5SP350	ENST00000363298.1
H929	3241	chr1	217631390	1	2	PROMOTER	5.52756	chr1:217631265-217631515	chr1	217631265	217631515	[5.52756, 3.04]	66	+	217631324	SPATA17	ENST00000366933.4	308	-	217631082	GPATCH2	ENST00000366935.7:ENST00000366934.3
H929	6058	chr2	216109231	0	0	PROMOTER	5.16587	chr2:216109106-216109356	chr2	216109106	216109356	[5.16587]	66	+	216109297	XRCC5	ENST00000392132.6	1767	+	216107464	XRCC5	ENST00000392133.7
H929	6036	chr2	214411132	8.49	17	PROMOTER	20.0302	chr2:214411007-214411257	chr2	214411007	214411257	[4.98, 20.03025]	67	+	214411065	VWC2L	ENST00000312504.9:ENST00000427124.1
H929	25296	chr12	108633892	43.86	95	PROMOTER	18.7014	chr12:108633767-108634017	chr12	108633767	108634017	[12.35, 18.70138, 1.08]	67	-	108633959	SELPLG	ENST00000550948.1	1814	-	108632078	SELPLG	ENST00000228463.6	1918	+	108635810	MIR4496	ENST00000635896.1	1957	+	108635849	RP11-689B22.2	ENST00000547282.1
H929	16923	chr7	106661063	6	12	PROMOTER	7.0073	chr7:106660938-106661188	chr7	106660938	106661188	[7.0073, 4.23]	67	-	106660996	CCDC71L	ENST00000523505.1	137	-	106660926	CCDC71L	ENST00000315965.6
H929	5776	chr2	196171508	0	0	PROMOTER	6.49577	chr2:196171383-196171633	chr2	196171383	196171633	[6.49577]	67	-	196171575	STK17B	ENST00000263955.8
H929	765	chr1	65704030	4	8	PROMOTER	33.0769	chr1:65703905-65704155	chr1	65703905	65704155	[33.07692, 12.71]	68	+	65703962	RP11-433N2.1	ENST00000646875.1
H929	25721	chr13	42992317	10.49	21	PROMOTER	14.1483	chr13:42992192-42992442	chr13	42992192	42992442	[14.1483, 3.51]	68	-	42992249	EPSTI1	ENST00000313624.11	87	-	42992230	EPSTI1	ENST00000313640.11	152	-	42992165	EPSTI1	ENST00000398762.7
H929	28226	chr16	72008520	0	0	PROMOTER	8.80465	chr16:72008395-72008645	chr16	72008395	72008645	[8.80465]	68	+	72008588	DHODH	ENST00000572887.5	224	+	72008744	DHODH	ENST00000219240.8
H929	32960	chrX	119943840	0	0	PROMOTER	5.99645	chrX:119943715-119943965	chrX	119943715	119943965	[5.99645]	68	-	119943772	NKAP	ENST00000371410.4
H929	8041	chr3	150546569	87.5	175	PROMOTER	5.38677	chr3:150546444-150546694	chr3	150546444	150546694	[5.38677, 2.52207]	68	-	150546501	SERP1	ENST00000487153.1	70	-	150546499	SERP1	ENST00000491660.1	72	-	150546641	SERP1	ENST00000239944.6	116	+	150546685	EIF2A	ENST00000487799.5	125	+	150546694	EIF2A	ENST00000460851.5	218	+	150546787	EIF2A	ENST00000406576.7	225	+	150546794	EIF2A	ENST00000273435.9
H929	12632	chr5	119354245	3.46	7	PROMOTER	70.5344	chr5:119354120-119354370	chr5	119354120	119354370	[22.11, 70.53436]	69	+	119354314	TNFAIP8	ENST00000504771.2	528	+	119354773	TNFAIP8	ENST00000503646.1	1068	+	119355313	TNFAIP8	ENST00000504642.1	1790	+	119356035	TNFAIP8	ENST00000415806.2
H929	22282	chr11	1853039	0	1	PROMOTER	53.5568	chr11:1852914-1853164	chr11	1852914	1853164	[32.54, 53.55676]	69	+	1852970	LSP1	ENST00000311604.7
H929	16941	chr7	107169842	4	8	PROMOTER	15.2135	chr7:107169717-107169967	chr7	107169717	107169967	[15.21354, 4.09]	69	+	107169773	HBP1	ENST00000485846.5	827	+	107169015	HBP1	ENST00000222574.8	881	+	107168961	HBP1	ENST00000468410.5
H929	12997	chr5	140175148	0	0	PROMOTER	13.437	chr5:140175023-140175273	chr5	140175023	140175273	[13.43702]	69	+	140175217	CYSTM1	ENST00000644078.1	506	+	140174642	CYSTM1	ENST00000261811.5
H929	14727	chr6	52284950	7.48	15	PROMOTER	7.87189	chr6:52284825-52285075	chr6	52284825	52285075	[7.87189, 2.8]	69	-	52284881	MCM3	ENST00000616552.4:ENST00000419835.7	113	-	52284837	MCM3	ENST00000596288.5	199	-	52284751	MCM3	ENST00000229854.11
H929	223	chr1	21783675	0	0	PROMOTER	6.39951	chr1:21783550-21783800	chr1	21783550	21783800	[6.39951]	69	-	21783606	USP48	ENST00000308271.13:ENST00000421625.6	480	-	21783195	USP48	ENST00000400301.5	684	-	21782991	USP48	ENST00000529637.5
H929	30741	chr19	17523371	25	58	PROMOTER	45.9311	chr19:17523246-17523496	chr19	17523246	17523496	[13.48, 45.9311, 15.74]	70	+	17523301	FAM129C	ENST00000595684.5:ENST00000332386.9:ENST00000335393.8
H929	11386	chr5	55978178	11.49	23	PROMOTER	12.2147	chr5:55978053-55978303	chr5	55978053	55978303	[12.21474, 7.79]	70	+	55978248	CTD-2227I18.1	ENST00000645512.1	1864	-	55976314	IL6ST	ENST00000336909.9:ENST00000381287.8	1900	-	55976278	IL6ST	ENST00000381294.7:ENST00000381286.7:ENST00000381293.6:ENST00000396816.1
H929	7782	chr3	129161363	1.41	3	PROMOTER	10.7161	chr3:129161238-129161488	chr3	129161238	129161488	[10.71606, 5.48]	70	-	129161293	ISY1	ENST00000393295.7	315	-	129161048	ISY1	ENST00000273541.12	326	-	129161037	ISY1	ENST00000393292.7	327	-	129161036	ISY1-RAB43	ENST00000418265.1
H929	19922	chr9	19230505	2.45	5	PROMOTER	7.00838	chr9:19230380-19230630	chr9	19230380	19230630	[4.24, 7.00838]	70	+	19230435	DENND4C	ENST00000434457.6:ENST00000602925.5
H929	31328	chr20	35742383	76.52	173	PROMOTER	13.2467	chr20:35742258-35742508	chr20	35742258	35742508	[6.37, 13.24665, 7.75]	71	-	35742312	RBM39	ENST00000361162.10	145	-	35742238	RBM39	ENST00000528062.7	151	-	35742232	RBM39	ENST00000397370.3	432	-	35741951	RBM39	ENST00000253363.10
H929	273	chr1	24415723	3	6	PROMOTER	6.1064	chr1:24415598-24415848	chr1	24415598	24415848	[6.1064, 5.56]	71	+	24415794	NIPAL3	ENST00000374399.8	80	+	24415803	NIPAL3	ENST00000003912.7	90	+	24415813	NIPAL3	ENST00000358028.8	91	+	24415814	NIPAL3	ENST00000339255.2	626	-	24415097	STPG1	ENST00000374409.5	1951	-	24413772	STPG1	ENST00000337248.8	1998	-	24413725	STPG1	ENST00000003583.12
H929	31077	chr19	51571227	3.46	7	PROMOTER	5.59729	chr19:51571102-51571352	chr19	51571102	51571352	[5.59729, 2.4]	71	+	51571298	ZNF175	ENST00000545217.5:ENST00000262259.6	77	+	51571304	ZNF175	ENST00000596504.1
H929	19810	chr9	4679400	9	18	PROMOTER	5.42563	chr9:4679275-4679525	chr9	4679275	4679525	[5.42563, 4.53]	71	-	4679471	RP11-6J24.6	ENST00000609131.1	102	-	4679502	RP11-6J24.6	ENST00000607997.1	159	+	4679559	CDC37L1	ENST00000381858.5	166	+	4679566	CDC37L1	ENST00000381854.3
H929	25640	chr13	19863786	3	6	PROMOTER	26.6648	chr13:19863661-19863911	chr13	19863661	19863911	[8.36, 26.66483]	72	+	19863858	RP11-61K9.3	ENST00000620617.1	150	-	19863636	ZMYM5	ENST00000337963.8	262	-	19863524	ZMYM5	ENST00000382905.8	278	-	19863508	ZMYM5	ENST00000382907.8
H929	1965	chr1	163071972	4	8	PROMOTER	15.4907	chr1:163071847-163072097	chr1	163071847	163072097	[5.23, 15.49068]	72	+	163072044	RGS4	ENST00000367906.7
H929	16763	chr7	92833989	0	0	PROMOTER	10.1596	chr7:92833864-92834114	chr7	92833864	92834114	[10.15959]	72	-	92833917	CDK6	ENST00000265734.8
H929	30483	chr19	2740224	0	0	PROMOTER	8.51487	chr19:2740099-2740349	chr19	2740099	2740349	[8.51487]	72	-	2740152	SLC39A3	ENST00000269740.8	176	-	2740048	AC006538.4	ENST00000586572.1	196	-	2740028	SLC39A3	ENST00000455372.2	207	-	2740017	SLC39A3	ENST00000545664.5
H929	4512	chr2	66435061	4.47	9	PROMOTER	8.10232	chr2:66434936-66435186	chr2	66434936	66435186	[8.10232, 4.51]	72	+	66435133	MEIS1	ENST00000560281.6	339	+	66435400	MEIS1	ENST00000272369.13	497	+	66435558	MEIS1	ENST00000488550.5	1591	-	66433470	MEIS1-AS3	ENST00000454167.1
H929	26223	chr14	65318862	7	14	PROMOTER	7.33696	chr14:65318737-65318987	chr14	65318737	65318987	[3.11, 7.33696]	72	-	65318790	CTD-2509G16.5	ENST00000553754.1
H929	14637	chr6	45328441	10.49	21	PROMOTER	5.59729	chr6:45328316-45328566	chr6	45328316	45328566	[2.61, 5.59729]	72	+	45328369	RUNX2	ENST00000371438.5	111	+	45328330	RUNX2	ENST00000647337.1	118	+	45328323	RUNX2	ENST00000465038.6	124	+	45328317	RUNX2	ENST00000371432.7	286	+	45328727	RUNX2	ENST00000371436.10:ENST00000576263.5
H929	1375	chr1	150629213	5.48	11	PROMOTER	144.07	chr1:150629088-150629338	chr1	150629088	150629338	[45.0886, 144.07]	73	-	150629140	ENSA	ENST00000361532.9	85	-	150629128	ENSA	ENST00000361631.9	97	-	150629116	ENSA	ENST00000513281.5	257	-	150629470	ENSA	ENST00000638926.1	346	-	150629559	ENSA	ENST00000503241.1	353	-	150629566	ENSA	ENST00000369016.8	363	-	150629576	ENSA	ENST00000339643.9	364	-
H929	32429	chr22	40636764	1	2	PROMOTER	114.2	chr22:40636639-40636889	chr22	40636639	40636889	[114.19976, 76.14]	73	-	40636691	MKL1	ENST00000402042.5	79	-	40636685	MKL1	ENST00000355630.7:ENST00000396617.7
H929	615	chr1	50970017	0	0	PROMOTER	9.73318	chr1:50969892-50970142	chr1	50969892	50970142	[9.73318]	73	+	50969944	CDKN2C	ENST00000371761.3	1322	+	50968695	CDKN2C	ENST00000396148.1
H929	33022	chrX	129540202	0	0	PROMOTER	6.31426	chrX:129540077-129540327	chrX	129540077	129540327	[6.31426]	73	+	129540275	OCRL	ENST00000357121.5:ENST00000371113.8
H929	1202	chr1	145281190	4	8	PROMOTER	75.811	chr1:145281065-145281315	chr1	145281065	145281315	[65.98, 75.81104]	74	+	145281116	CH17-373J23.1	ENST00000618589.1	74	+	145281116	RNVU1-14	ENST00000384770.1
H929	543	chr1	42846499	2.45	5	PROMOTER	49.1464	chr1:42846374-42846624	chr1	42846374	42846624	[17.57, 49.14637]	74	+	42846573	ZNF691	ENST00000372502.5	77	-	42846422	RP11-342M1.3	ENST00000414798.1	110	+	42846609	ZNF691	ENST00000372508.7	112	-	42846387	RP11-342M1.3	ENST00000444563.5	127	+	42846626	ZNF691	ENST00000372507.5	129	+	42846628	ZNF691	ENST00000372506.5	137	-	42846362	RP11-342M1.3	ENST00000416809.2	138	+
H929	2982	chr1	206612533	0	0	PROMOTER	9.22241	chr1:206612408-206612658	chr1	206612408	206612658	[9.22241]	74	-	206612459	EIF2D	ENST00000271764.6:ENST00000367114.7
H929	17838	chr8	33473193	0	0	PROMOTER	6.84445	chr8:33473068-33473318	chr8	33473068	33473318	[6.84445]	74	-	33473119	FUT10	ENST00000524021.1	229	-	33473422	FUT10	ENST00000327671.9
H929	21822	chr10	95656781	0	0	PROMOTER	94.59	chr10:95656656-95656906	chr10	95656656	95656906	[91.58637, 94.59]	75	-	95656706	ALDH18A1	ENST00000371224.6:ENST00000371221.3
H929	24056	chr11	125592720	1	2	PROMOTER	23.8818	chr11:125592595-125592845	chr11	125592595	125592845	[11.75, 23.88183]	75	+	125592795	STT3A	ENST00000392708.8	116	+	125592836	STT3A	ENST00000529196.5	147	+	125592867	STT3A	ENST00000531491.5	152	-	125592568	RP11-791J7.2	ENST00000530526.1
H929	23152	chr11	93719528	1.41	3	PROMOTER	18.8658	chr11:93719403-93719653	chr11	93719403	93719653	[4.08, 18.86577]	75	+	93719603	RF00019	ENST00000363005.1	1985	+	93721513	SCARNA9	ENST00000530422.1
H929	31123	chr20	462628	3.46	7	PROMOTER	12.5755	chr20:462503-462753	chr20	462503	462753	[12.57552, 4.26]	75	-	462553	TBC1D20	ENST00000354200.4
H929	24559	chr12	30755149	0	0	PROMOTER	10.9216	chr12:30755024-30755274	chr12	30755024	30755274	[10.92158]	75	+	30755074	RP11-77I22.2	ENST00000500076.2	635	-	30754514	CAPRIN2	ENST00000298892.9	838	-	30754311	CAPRIN2	ENST00000395805.6:ENST00000417045.5
H929	10991	chr5	31532191	0	0	PROMOTER	5.67647	chr5:31532066-31532316	chr5	31532066	31532316	[5.67647]	75	+	31532266	C5orf22	ENST00000325366.13	82	-	31532109	DROSHA	ENST00000513349.5	130	-	31532061	DROSHA	ENST00000511367.6
H929	32944	chrX	115969014	0	0	PROMOTER	5.34262	chrX:115968889-115969139	chrX	115968889	115969139	[5.34262]	75	-	115969089	RP11-761E20.1	ENST00000430756.2
H929	5519	chr2	174597689	3	6	PROMOTER	9.22241	chr2:174597564-174597814	chr2	174597564	174597814	[9.22241, 2.86]	76	-	174597765	WIPF1	ENST00000409891.5	80	-	174597769	WIPF1	ENST00000410117.5	517	-	174598206	WIPF1	ENST00000392546.6
H929	2924	chr1	203861539	0	0	PROMOTER	8.57326	chr1:203861414-203861664	chr1	203861414	203861664	[8.57326]	76	+	203861615	SNRPE	ENST00000414487.6
H929	32387	chr22	38705647	4.47	9	PROMOTER	7.14927	chr22:38705522-38705772	chr22	38705522	38705772	[5.23, 7.14927]	76	+	38705723	GTPBP1	ENST00000216044.9
H929	13239	chr5	150904713	3.46	7	PROMOTER	5.79067	chr5:150904588-150904838	chr5	150904588	150904838	[5.79067, 3.81]	76	-	150904789	ZNF300	ENST00000427179.5	265	-	150904978	ZNF300	ENST00000394226.2	270	-	150904983	ZNF300	ENST00000274599.9:ENST00000418587.6:ENST00000446148.6
H929	32731	chrX	27399073	1	2	PROMOTER	5.06748	chrX:27398948-27399198	chrX	27398948	27399198	[3.11, 5.06748]	76	-	27398997	RP11-268G12.1	ENST00000422048.5	84	-	27398989	RP11-268G12.1	ENST00000608735.1
H929	5910	chr2	203706625	14.7	36	PROMOTER	59.3222	chr2:203706500-203706750	chr2	203706500	203706750	[58.0, 59.32218, 26.58]	77	+	203706548	CD28	ENST00000324106.8	101	+	203706524	CD28	ENST00000458610.6	150	+	203706475	CD28	ENST00000374481.7
H929	30693	chr19	14006499	8	16	PROMOTER	51.5406	chr19:14006374-14006624	chr19	14006374	14006624	[51.54063, 27.17]	77	+	14006422	CTB-55O6.13	ENST00000622575.1	214	-	14006285	RFX1	ENST00000254325.8
H929	23859	chr11	119084806	0	0	PROMOTER	8.69602	chr11:119084681-119084931	chr11	119084681	119084931	[8.69602]	77	+	119084883	HMBS	ENST00000278715.7	79	+	119084885	HMBS	ENST00000537841.5:ENST00000542729.5	99	+	119084905	HMBS	ENST00000442944.6	108	+	119084914	HMBS	ENST00000544387.5	124	+	119084930	HMBS	ENST00000543090.5
H929	28820	chr17	36486552	0	1	PROMOTER	7.6212	chr17:36486427-36486677	chr17	36486427	36486677	[7.6212, 3.09]	77	+	36486629	ZNHIT3	ENST00000619730.4	83	+	36486635	ZNHIT3	ENST00000617429.4	143	+	36486695	ZNHIT3	ENST00000620324.4
H929	26326	chr14	73136524	0	0	PROMOTER	5.77469	chr14:73136399-73136649	chr14	73136399	73136649	[5.77469]	77	+	73136447	PSEN1	ENST00000394157.7:ENST00000357710.8:ENST00000324501.9	293	+	73136817	PSEN1	ENST00000394164.5
H929	16940	chr7	107168883	8	16	PROMOTER	29.3586	chr7:107168758-107169008	chr7	107168758	107169008	[29.35855, 17.28]	78	+	107168961	HBP1	ENST00000468410.5	132	+	107169015	HBP1	ENST00000222574.8	890	+	107169773	HBP1	ENST00000485846.5
H929	2119	chr1	166876249	0	0	PROMOTER	9.8251	chr1:166876124-166876374	chr1	166876124	166876374	[9.8251]	78	-	166876327	TADA1	ENST00000367874.4
H929	16859	chr7	103347634	0	0	PROMOTER	6.97102	chr7:103347509-103347759	chr7	103347509	103347759	[6.97102]	78	+	103347712	PSMC2	ENST00000292644.4
H929	969	chr1	109112833	4.47	9	PROMOTER	6.03541	chr1:109112708-109112958	chr1	109112708	109112958	[6.03541, 2.25]	78	-	109112755	C1orf194	ENST00000369948.7	86	-	109112747	C1orf194	ENST00000369945.7	1024	-	109113857	C1orf194	ENST00000369949.8	1168	+	109114001	KIAA1324	ENST00000369939.7	1322	+	109114155	KIAA1324	ENST00000529753.5
H929	2607	chr1	181034082	0	0	PROMOTER	8.61781	chr1:181033957-181034207	chr1	181033957	181034207	[8.61781]	79	+	181034003	MR1	ENST00000367579.7:ENST00000282990.10:ENST00000367580.5	657	+	181033425	MR1	ENST00000434571.6:ENST00000614012.4:ENST00000617803.4
H929	28731	chr17	29639706	0	0	PROMOTER	6.39514	chr17:29639581-29639831	chr17	29639581	29639831	[6.39514]	79	+	29639627	RP11-68I3.5	ENST00000581240.1	1996	-	29641702	RNU6-920P	ENST00000410926.1
H929	22700	chr11	46936668	0	0	PROMOTER	5.64936	chr11:46936543-46936793	chr11	46936543	46936793	[5.64936]	79	+	46936747	C11orf49	ENST00000278460.11	86	+	46936754	C11orf49	ENST00000378618.6	100	+	46936768	C11orf49	ENST00000395460.6	110	+	46936778	C11orf49	ENST00000378615.7
H929	15448	chr6	125919145	0	0	PROMOTER	5.59729	chr6:125919020-125919270	chr6	125919020	125919270	[5.59729]	79	+	125919224	NCOA7	ENST00000438495.6	160	+	125919305	NCOA7	ENST00000444128.2
H929	25955	chr14	23321369	0	0	PROMOTER	40.7723	chr14:23321244-23321494	chr14	23321244	23321494	[15.77, 40.77227]	80	+	23321289	PABPN1	ENST00000216727.8	88	+	23321457	PABPN1	ENST00000397276.6	174	+	23321543	PABPN1	ENST00000556821.5	653	+	23322022	PABPN1	ENST00000557702.5
H929	2545	chr1	177970293	7	14	PROMOTER	11.7714	chr1:177970168-177970418	chr1	177970168	177970418	[11.77144, 7.23]	80	-	177970213	SEC16B	ENST00000464631.6	378	-	177969915	SEC16B	ENST00000308284.10
H929	13466	chr5	160009033	4.47	9	PROMOTER	11.6289	chr5:160008908-160009158	chr5	160008908	160009158	[11.62892, 5.16]	80	+	160009113	TTC1	ENST00000522793.5:ENST00000231238.9	588	+	160008445	RF00019	ENST00000362528.1
H929	27226	chr15	68277723	0	0	PROMOTER	11.038	chr15:68277598-68277848	chr15	68277598	68277848	[11.03803]	80	+	68277803	FEM1B	ENST00000306917.4	271	-	68277994	RP11-315D16.4	ENST00000563057.1
H929	26701	chr14	101809985	0	0	PROMOTER	10.5701	chr14:101809860-101810110	chr14	101809860	101810110	[10.57006]	80	+	101809905	PPP2R5C	ENST00000557095.5	90	+	101809895	PPP2R5C	ENST00000445439.7:ENST00000334743.9	116	+	101809869	PPP2R5C	ENST00000557714.1	150	+	101809835	PPP2R5C	ENST00000556946.1	182	+	101809803	PPP2R5C	ENST00000350249.7	336	-	101810321	CTD-2017C7.2	ENST00000554859.1
H929	29865	chr18	50287731	0	0	PROMOTER	9.18581	chr18:50287606-50287856	chr18	50287606	50287856	[9.18581]	80	-	50287651	CXXC1	ENST00000589940.5	95	-	50287636	CXXC1	ENST00000412036.6	573	-	50288304	CXXC1	ENST00000285106.10
H929	2084	chr1	165769260	0	0	PROMOTER	8.59258	chr1:165769135-165769385	chr1	165769135	165769385	[8.59258]	80	-	165769180	TMCO1	ENST00000367881.9	331	+	165768929	RP11-466F5.8	ENST00000423121.1	338	-	165768922	TMCO1	ENST00000612311.4:ENST00000628579.1	358	-	165768902	TMCO1	ENST00000392129.10	384	-	165768876	TMCO1	ENST00000464650.5
H929	22789	chr11	62653382	7.48	15	PROMOTER	5.67647	chr11:62653257-62653507	chr11	62653257	62653507	[3.96, 5.67647]	80	-	62653302	INTS5	ENST00000330574.2
H929	28628	chr17	16381011	0	0	PROMOTER	5.64367	chr17:16380886-16381136	chr17	16380886	16381136	[5.64367]	80	+	16381091	UBB	ENST00000535788.1	212	+	16380799	UBB	ENST00000302182.7	279	+	16381290	UBB	ENST00000395839.5	330	+	16381341	UBB	ENST00000395837.1	454	+	16381465	UBB	ENST00000614404.1	1658	-	16382669	RP11-138I1.4	ENST00000583934.1
H929	15010	chr6	89081756	0	0	PROMOTER	5.61695	chr6:89081631-89081881	chr6	89081631	89081881	[5.61695]	80	+	89081836	PNRC1	ENST00000354922.3	978	+	89080778	PNRC1	ENST00000336032.3	1005	+	89080751	PNRC1	ENST00000369472.1	1089	-	89080667	RP11-63L7.5	ENST00000606729.1
H929	5614	chr2	181305732	5	10	PROMOTER	5.43	chr2:181305607-181305857	chr2	181305607	181305857	[4.96003, 5.43]	80	-	181305652	MIR4437	ENST00000581331.1
H929	14411	chr6	30556966	0	0	PROMOTER	5.38	chr6:30556841-30557091	chr6	30556841	30557091	[5.38]	80	+	30556886	PRR3	ENST00000376560.7	208	-	30557174	GNL1	ENST00000376621.7	314	+	30557280	PRR3	ENST00000376557.3
H929	1839	chr1	161045022	1.41	3	PROMOTER	59.6774	chr1:161044897-161045147	chr1	161044897	161045147	[59.67743, 42.2]	81	-	161044941	USF1	ENST00000368020.5	955	-	161045977	USF1	ENST00000368021.7	1663	-	161043359	USF1	ENST00000368019.5
H929	852	chr1	78649750	5.48	11	PROMOTER	17.451	chr1:78649625-78649875	chr1	78649625	78649875	[17.45105, 7.15]	81	+	78649831	IFI44	ENST00000370747.8
H929	26190	chr14	62081235	2	4	PROMOTER	10.7161	chr14:62081110-62081360	chr14	62081110	62081360	[4.9, 10.71606]	81	-	62081154	RP11-355I22.5	ENST00000553990.1	1888	+	62079347	SYT16	ENST00000430451.3
H929	2733	chr1	186375757	0	0	PROMOTER	8.44993	chr1:186375632-186375882	chr1	186375632	186375882	[8.44993]	81	+	186375838	ODR4	ENST00000419367.8:ENST00000367470.8	112	+	186375869	ODR4	ENST00000287859.10	432	-	186375325	TPR	ENST00000367478.8:ENST00000613151.1
H929	21119	chr10	14954351	6	12	PROMOTER	7.87	chr10:14954226-14954476	chr10	14954226	14954476	[6.24401, 7.87]	81	-	14954432	DCLRE1C	ENST00000378289.8	256	-	14954095	DCLRE1C	ENST00000378246.6	279	-	14954072	DCLRE1C	ENST00000378258.5	293	-	14954058	DCLRE1C	ENST00000357717.6	303	-	14954048	DCLRE1C	ENST00000378249.5:ENST00000378254.5:ENST00000378255.5:ENST00000378278.6:ENST00000396817.6
H929	1483	chr1	153727986	0	0	PROMOTER	5.4059	chr1:153727861-153728111	chr1	153727861	153728111	[5.4059]	81	+	153728067	INTS3	ENST00000318967.6	105	+	153728091	INTS3	ENST00000435409.6	1633	-	153726353	RF00019	ENST00000362695.1
H929	20981	chr10	5890121	2	4	PROMOTER	124.35	chr10:5889996-5890246	chr10	5889996	5890246	[101.76858, 124.35]	82	+	5890203	FBH1	ENST00000397269.7	110	+	5890231	FBH1	ENST00000362091.8	215	-	5889906	ANKRD16	ENST00000191063.8	223	-	5889898	ANKRD16	ENST00000380094.9	250	-	5889871	ANKRD16	ENST00000380092.8
H929	27274	chr15	70892544	4	8	PROMOTER	18.5466	chr15:70892419-70892669	chr15	70892419	70892669	[4.57, 18.54663]	82	+	70892626	LRRC49	ENST00000560369.5	91	+	70892635	LRRC49	ENST00000260382.9	101	+	70892443	LRRC49	ENST00000443425.6	241	-	70892785	THAP10	ENST00000249861.8
H929	21451	chr10	51699673	0	0	PROMOTER	13.1942	chr10:51699548-51699798	chr10	51699548	51699798	[13.19422]	82	-	51699591	CSTF2T	ENST00000331173.5
H929	27863	chr16	20741878	0	0	PROMOTER	11.8853	chr16:20741753-20742003	chr16	20741753	20742003	[11.88529]	82	-	20741796	THUMPD1	ENST00000396083.6	206	-	20742084	THUMPD1	ENST00000381337.6
H929	25448	chr12	120302239	0	0	PROMOTER	9.96549	chr12:120302114-120302364	chr12	120302114	120302364	[9.96549]	82	+	120302321	SIRT4	ENST00000202967.4
H929	18655	chr8	80029994	0	0	PROMOTER	6.58756	chr8:80029869-80030119	chr8	80029869	80030119	[6.58756]	82	-	80029912	MRPS28	ENST00000521434.5	277	-	80030271	MRPS28	ENST00000276585.8	295	-	80030289	MRPS28	ENST00000521605.1
H929	24315	chr12	401494	0	0	PROMOTER	5.638	chr12:401369-401619	chr12	401369	401619	[5.638]	82	+	401576	CCDC77	ENST00000239830.8	143	+	401637	CCDC77	ENST00000412006.6
H929	386	chr1	28736858	120.5	241	PROMOTER	5.34262	chr1:28736733-28736983	chr1	28736733	28736983	[5.34262, 3.04135]	82	+	28736940	YTHDF2	ENST00000541996.5	99	+	28736759	YTHDF2	ENST00000373812.7	237	+	28736621	YTHDF2	ENST00000542507.5
H929	25033	chr12	89019762	1	2	PROMOTER	23.6164	chr12:89019637-89019887	chr12	89019637	89019887	[9.66, 23.61635]	83	-	89019679	RP11-13A1.1	ENST00000500381.2
H929	15552	chr6	133953112	7	14	PROMOTER	16.9481	chr6:133952987-133953237	chr6	133952987	133953237	[16.94814, 6.88]	83	+	133953195	TBPL1	ENST00000367871.5:ENST00000237264.8	942	+	133952170	TBPL1	ENST00000613034.4
H929	16059	chr7	22500260	0	0	PROMOTER	8.25808	chr7:22500135-22500385	chr7	22500135	22500385	[8.25808]	83	-	22500177	STEAP1B	ENST00000406890.6	238	-	22500498	STEAP1B	ENST00000404369.8
H929	19823	chr9	5510487	0	0	PROMOTER	6.75547	chr9:5510362-5510612	chr9	5510362	5510612	[6.75547]	83	+	5510570	PDCD1LG2	ENST00000397747.4
H929	1544	chr1	154983268	8	16	PROMOTER	264.56	chr1:154983143-154983393	chr1	154983143	154983393	[264.56, 172.7789]	84	+	154983352	FLAD1	ENST00000368433.5	91	+	154983359	FLAD1	ENST00000315144.14	97	+	154983365	FLAD1	ENST00000368432.5	99	+	154983367	FLAD1	ENST00000368431.7	105	+	154983373	FLAD1	ENST00000292180.7
H929	13799	chr5	177554740	0	0	PROMOTER	13.3553	chr5:177554615-177554865	chr5	177554615	177554865	[13.35529]	84	+	177554824	RP11-1277A3.3	ENST00000606358.1	233	-	177554507	FAM193B	ENST00000514747.5
H929	8392	chr3	182793310	1.41	3	PROMOTER	6.75547	chr3:182793185-182793435	chr3	182793185	182793435	[6.75547, 3.27]	84	-	182793394	RP11-225N10.1	ENST00000488882.1	190	+	182793500	ATP11B	ENST00000323116.9	193	+	182793503	ATP11B	ENST00000493826.1
H929	12138	chr5	95822921	0	0	PROMOTER	5.894	chr5:95822796-95823046	chr5	95822796	95823046	[5.894]	84	-	95823005	GLRX	ENST00000237858.10	195	-	95822726	GLRX	ENST00000508780.5	199	-	95822722	GLRX	ENST00000505427.1	207	-	95822714	GLRX	ENST00000379979.8	210	-	95822711	GLRX	ENST00000512469.2
H929	15250	chr6	109009640	4.47	9	PROMOTER	145.28	chr6:109009515-109009765	chr6	109009515	109009765	[145.28, 100.1316]	85	-	109009555	SESN1	ENST00000356644.7	652	-	109008988	SESN1	ENST00000302071.6
H929	30578	chr19	8390304	4	8	PROMOTER	17.6668	chr19:8390179-8390429	chr19	8390179	8390429	[17.66682, 7.1]	85	+	8390389	RAB11B	ENST00000601897.1	89	+	8390393	RAB11B	ENST00000594216.1	105	+	8390199	RAB11B	ENST00000328024.10	381	-	8390685	RP11-886P16.3	ENST00000593581.5	924	-	8389380	MIR4999	ENST00000585029.1
H929	24309	chr12	111935	2	4	PROMOTER	13.2967	chr12:111810-112060	chr12	111810	112060	[13.29674, 5.58]	85	-	111850	RP11-598F7.3	ENST00000540226.1
H929	3142	chr1	212608755	0	0	PROMOTER	12.7677	chr1:212608630-212608880	chr1	212608630	212608880	[12.76767]	85	+	212608670	ATF3	ENST00000341491.8	127	+	212608628	ATF3	ENST00000613954.4
H929	28819	chr17	36210839	3	6	PROMOTER	9.77276	chr17:36210714-36210964	chr17	36210714	36210964	[9.77276, 3.62]	85	+	36210924	CCL4L2	ENST00000615418.4	224	+	36211063	CCL4L2	ENST00000610565.4:ENST00000613173.4:ENST00000617405.4:ENST00000617416.4:ENST00000620055.4:ENST00000620098.4:ENST00000620250.1:ENST00000620576.4:ENST00000620732.4
H929	32107	chr21	41361858	8.49	17	PROMOTER	9.06517	chr21:41361733-41361983	chr21	41361733	41361983	[9.06517, 4.56]	85	+	41361943	MX2	ENST00000330714.7
H929	29293	chr17	74213429	0	0	PROMOTER	7.5636	chr17:74213304-74213554	chr17	74213304	74213554	[7.5636]	85	+	74213514	TTYH2	ENST00000269346.8	108	-	74213321	CTD-2514K5.2	ENST00000499670.2
H929	14887	chr6	75243924	0	0	PROMOTER	6.72893	chr6:75243799-75244049	chr6	75243799	75244049	[6.72893]	85	-	75244009	COX7A2	ENST00000370089.6	129	-	75243795	COX7A2	ENST00000509698.5	136	-	75243788	COX7A2	ENST00000460985.1	139	-	75243785	COX7A2	ENST00000472311.6
H929	229	chr1	22451952	0	0	PROMOTER	6.58756	chr1:22451827-22452077	chr1	22451827	22452077	[6.58756]	85	+	22451867	ZBTB40	ENST00000375647.4	101	+	22451851	ZBTB40	ENST00000374651.8:ENST00000404138.5
H929	32907	chrX	102599435	0	0	PROMOTER	5.06748	chrX:102599310-102599560	chrX	102599310	102599560	[5.06748]	85	+	102599520	ARMCX5	ENST00000604957.1	102	+	102599537	RP4-769N13.6	ENST00000476910.6	267	+	102599168	ARMCX5	ENST00000246174.6	1702	+	102601137	ARMCX5	ENST00000372742.1
H929	26645	chr14	95157508	0	1	PROMOTER	65.83	chr14:95157383-95157633	chr14	95157383	95157633	[65.83, 62.1352]	86	-	95157422	DICER1	ENST00000343455.7	137	+	95157645	AL356017.3	ENST00000554631.2	170	+	95157678	AL356017.3	ENST00000439819.5	252	+	95157760	AL356017.3	ENST00000435343.1	502	-	95158010	DICER1	ENST00000526495.5
H929	826	chr1	75786317	4	8	PROMOTER	21.3414	chr1:75786192-75786442	chr1	75786192	75786442	[6.58, 21.34142]	86	+	75786231	RABGGTB	ENST00000370826.3	116	+	75786201	RABGGTB	ENST00000319942.7	755	+	75787072	SNORD45C	ENST00000383893.1	1572	+	75787889	SNORD45A	ENST00000384512.1
H929	32545	chrM	9905	0	0	PROMOTER	14.9052	chrM:9780-10030	chrM	9780	10030	[14.90515]	86	+	9991	MT-TG	ENST00000387429.1	154	+	10059	MT-ND3	ENST00000361227.2	500	+	10405	MT-TR	ENST00000387439.1	565	+	10470	MT-ND4L	ENST00000361335.1	698	+	9207	MT-CO3	ENST00000362079.2	855	+	10760	MT-ND4	ENST00000361381.2	1378	+	8527	MT-ATP6	ENST00000361899.2	1539	+
H929	22312	chr11	5684956	3	6	PROMOTER	9.76272	chr11:5684831-5685081	chr11	5684831	5685081	[2.47, 9.76272]	86	-	5685042	TRIM5	ENST00000396847.7	107	-	5685063	TRIM5	ENST00000380034.7
H929	26633	chr14	93976705	0	0	PROMOTER	5.28	chr14:93976580-93976830	chr14	93976580	93976830	[5.28]	86	-	93976791	ASB2	ENST00000555019.5
H929	32109	chr21	41420601	0	0	PROMOTER	5.20867	chr21:41420476-41420726	chr21	41420476	41420726	[5.20867]	86	+	41420515	MX1	ENST00000398600.6
H929	13644	chr5	170331344	6	12	PROMOTER	40.9486	chr5:170331219-170331469	chr5	170331219	170331469	[22.61, 40.94859]	87	+	170331431	CTB-114C7.3	ENST00000436248.3
H929	4050	chr2	26785910	0	1	PROMOTER	25.8112	chr2:26785785-26786035	chr2	26785785	26786035	[25.81115, 7.73]	87	+	26785997	CENPA	ENST00000335756.8	158	+	26786068	CENPA	ENST00000233505.12
H929	8860	chr4	26320650	0	0	PROMOTER	10.5503	chr4:26320525-26320775	chr4	26320525	26320775	[10.55033]	87	+	26320563	RBPJ	ENST00000361572.10	150	+	26320800	RBPJ	ENST00000348160.8	157	+	26320807	RBPJ	ENST00000355476.7	940	+	26319710	RBPJ	ENST00000345843.7:ENST00000342295.5	952	+	26321602	RBPJ	ENST00000507561.5
H929	14485	chr6	33322923	0	0	PROMOTER	8.19444	chr6:33322798-33323048	chr6	33322798	33323048	[8.19444]	87	-	33323010	DAXX	ENST00000266000.10	91	-	33323014	DAXX	ENST00000374542.9	93	-	33323016	DAXX	ENST00000414083.6:ENST00000620164.4
H929	23428	chr11	104609389	3.46	7	PROMOTER	7.33568	chr11:104609264-104609514	chr11	104609264	104609514	[7.33568, 3.08]	87	-	104609302	RP11-886D15.1	ENST00000545630.1	93	-	104609296	RP11-886D15.1	ENST00000536529.5
H929	27955	chr16	28802656	0	0	PROMOTER	6.68286	chr16:28802531-28802781	chr16	28802531	28802781	[6.68286]	87	+	28802743	RP11-1348G14.4	ENST00000507031.2
H929	22803	chr11	63563470	0	0	PROMOTER	5.36326	chr11:63563345-63563595	chr11	63563345	63563595	[5.36326]	87	-	63563383	HRASLS2	ENST00000255695.1
H929	29321	chr17	75855507	0	0	PROMOTER	5.07054	chr17:75855382-75855632	chr17	75855382	75855632	[5.07054]	87	-	75855420	WBP2	ENST00000254806.7:ENST00000626827.2	172	-	75855335	WBP2	ENST00000433525.6	185	-	75855322	WBP2	ENST00000585462.5	201	-	75855306	WBP2	ENST00000590221.5	1000	-	75856507	WBP2	ENST00000591399.5
H929	1305	chr1	148522689	39.36	84	PROMOTER	34.4518	chr1:148522564-148522814	chr1	148522564	148522814	[34.4518, 17.77, 15.39]	88	+	148522601	RF00003	ENST00000622285.1
H929	19743	chr9	272914	2	4	PROMOTER	28.907	chr9:272789-273039	chr9	272789	273039	[9.6, 28.90703]	88	-	273002	RP11-59O6.3	ENST00000429661.1	134	+	273048	DOCK8	ENST00000453981.5	156	+	273070	DOCK8	ENST00000469391.5
H929	32546	chrM	10672	0	0	PROMOTER	18.3974	chrM:10547-10797	chrM	10547	10797	[18.39738]	88	+	10760	MT-ND4	ENST00000361381.2	202	+	10470	MT-ND4L	ENST00000361335.1	267	+	10405	MT-TR	ENST00000387439.1	613	+	10059	MT-ND3	ENST00000361227.2	681	+	9991	MT-TG	ENST00000387429.1	1465	+	9207	MT-CO3	ENST00000362079.2	1466	+	12138	MT-TH	ENST00000387441.1	1535	+
H929	25067	chr12	92363920	93.5	187	PROMOTER	14.1483	chr12:92363795-92364045	chr12	92363795	92364045	[1.44222, 14.1483]	88	-	92363832	RP11-756G20.1	ENST00000615716.1
H929	15109	chr6	97440757	0	0	PROMOTER	8.25481	chr6:97440632-97440882	chr6	97440632	97440882	[8.25481]	88	+	97440845	RP11-436D23.1	ENST00000634677.1	93	+	97440850	RP11-436D23.1	ENST00000635561.1
H929	31551	chr20	45857495	2.45	5	PROMOTER	111.7	chr20:45857370-45857620	chr20	45857370	45857620	[108.5486, 111.7]	89	-	45857406	ACOT8	ENST00000217455.8	122	+	45857617	ZSWIM3	ENST00000255152.2
H929	16033	chr7	20217497	49.97	106	PROMOTER	66.8129	chr7:20217372-20217622	chr7	20217372	20217622	[2.8, 18.18, 66.81292]	89	+	20217586	AC005083.1	ENST00000430859.1	93	-	20217404	MACC1	ENST00000332878.8	107	-	20217390	MACC1	ENST00000400331.9
H929	1357	chr1	150487274	2	4	PROMOTER	66.68	chr1:150487149-150487399	chr1	150487149	150487399	[66.68, 53.721]	90	+	150487364	TARS2	ENST00000438568.6	140	+	150487414	TARS2	ENST00000369054.6	143	+	150487417	TARS2	ENST00000369064.7	146	+	150487420	TARS2	ENST00000606933.5
H929	21883	chr10	100535769	4.47	9	PROMOTER	12.2484	chr10:100535644-100535894	chr10	100535644	100535894	[12.24842, 4.02]	90	+	100535859	HIF1AN	ENST00000299163.6
H929	4757	chr2	96638399	0	0	PROMOTER	7.39054	chr2:96638274-96638524	chr2	96638274	96638524	[7.39054]	90	-	96638309	KANSL3	ENST00000431828.5
H929	6015	chr2	212124817	0	0	PROMOTER	6.75547	chr2:212124692-212124942	chr2	212124692	212124942	[6.75547]	90	-	212124907	ERBB4	ENST00000402597.6
H929	3426	chr1	229227652	7	14	PROMOTER	6.08413	chr1:229227527-229227777	chr1	229227527	229227777	[6.08413, 1.32]	90	-	229227562	RP5-1061H20.5	ENST00000430677.1
H929	22780	chr11	61680342	1	2	PROMOTER	202.78	chr11:61680217-61680467	chr11	61680217	61680467	[202.78, 92.43127]	91	+	61680433	DAGLA	ENST00000257215.9
H929	25641	chr13	19958579	8	16	PROMOTER	37.2533	chr13:19958454-19958704	chr13	19958454	19958704	[37.25327, 15.39]	91	+	19958670	ZMYM2	ENST00000610343.4	129	+	19958708	ZMYM2	ENST00000382874.6	204	+	19958783	ZMYM2	ENST00000382871.3
H929	9666	chr4	113355808	101.36	216	PROMOTER	15.4258	chr4:113355683-113355933	chr4	113355683	113355933	[5.06748, 6.01, 15.42577]	91	+	113355717	ANK2	ENST00000612754.1
H929	1614	chr1	156767409	117.5	235	PROMOTER	12.0518	chr1:156767284-156767534	chr1	156767284	156767534	[10.02, 12.05177]	91	+	156767500	PRCC	ENST00000271526.8
H929	25965	chr14	24161182	0	0	PROMOTER	9.15398	chr14:24161057-24161307	chr14	24161057	24161307	[9.15398]	91	+	24161273	IRF9	ENST00000557894.5	129	+	24161053	IRF9	ENST00000396864.7
H929	33158	chrX	139933161	10.49	21	PROMOTER	8.83508	chrX:139933036-139933286	chrX	139933036	139933286	[8.83508, 5.76]	91	-	139933070	ATP11C	ENST00000370557.5
H929	28667	chr17	19188108	1.41	3	PROMOTER	38.688	chr17:19187983-19188233	chr17	19187983	19188233	[38.68801, 23.33]	92	+	19188016	SNORD3A	ENST00000584923.1
H929	21793	chr10	93702664	0	1	PROMOTER	20.9785	chr10:93702539-93702789	chr10	93702539	93702789	[11.17, 20.97851]	92	-	93702572	FRA10AC1	ENST00000359204.4
H929	24416	chr12	6944214	5	10	PROMOTER	17.62	chr12:6944089-6944339	chr12	6944089	6944339	[9.93841, 17.62]	92	+	6944122	C12orf57	ENST00000540506.2	191	+	6944023	C12orf57	ENST00000229281.5	380	+	6943834	C12orf57	ENST00000537087.5	390	-	6944604	U47924.31	ENST00000607421.1	397	+	6943817	C12orf57	ENST00000544681.1	398	+	6943816	RNU7-1	ENST00000458811.1
H929	10086	chr4	155354124	1.41	3	PROMOTER	14.7803	chr4:155353999-155354249	chr4	155353999	155354249	[14.78032, 3.39]	92	+	155354216	AC097467.2	ENST00000417474.1
H929	20648	chr9	112037822	33.91	83	PROMOTER	13.5231	chr9:112037697-112037947	chr9	112037697	112037947	[4.89, 13.52308, 6.08]	92	-	112037730	RP11-4O1.2	ENST00000563434.1
H929	11274	chr5	43515053	0	0	PROMOTER	12.518	chr5:43514928-43515178	chr5	43514928	43515178	[12.51798]	92	-	43515145	C5orf34	ENST00000306862.6	221	+	43515274	RP11-159F24.5	ENST00000504277.1
H929	22635	chr11	36594401	4	8	PROMOTER	10.9588	chr11:36594276-36594526	chr11	36594276	36594526	[3.63, 10.95885]	92	+	36594493	C11orf74	ENST00000446510.6	100	+	36594501	C11orf74	ENST00000334307.9	112	+	36594513	C11orf74	ENST00000347206.8	115	+	36594516	C11orf74	ENST00000534635.5	371	+	36594772	C11orf74	ENST00000617650.4
H929	1850	chr1	161177876	0	0	PROMOTER	8.92763	chr1:161177751-161178001	chr1	161177751	161178001	[4.26, 8.92763]	92	-	161177968	B4GALT3	ENST00000622395.4	379	-	161177497	B4GALT3	ENST00000367998.5	391	-	161177485	B4GALT3	ENST00000319769.9
H929	27641	chr16	2155266	0	0	PROMOTER	7.87189	chr16:2155141-2155391	chr16	2155141	2155391	[7.87189]	92	-	2155358	RP11-304L19.5	ENST00000563192.1	161	-	2155105	SNORD60	ENST00000383903.1	162	-	2155104	RF00345	ENST00000628177.1	432	+	2155698	TRAF7	ENST00000565383.5	499	+	2155765	TRAF7	ENST00000326181.10	538	+	2155804	TRAF7	ENST00000567653.5
H929	8965	chr4	40196999	0	0	PROMOTER	6.72251	chr4:40196874-40197124	chr4	40196874	40197124	[6.72251]	92	+	40196907	RHOH	ENST00000610353.4:ENST00000614836.1:ENST00000615083.4:ENST00000619474.4:ENST00000622175.4:ENST00000381799.9
H929	32014	chr21	32772008	5.48	11	PROMOTER	6.16321	chr21:32771883-32772133	chr21	32771883	32772133	[6.16321, 3.07]	92	+	32772100	C21orf62-AS1	ENST00000382375.8	150	-	32771858	PAXBP1	ENST00000331923.8	340	-	32771668	PAXBP1	ENST00000290178.4
H929	15083	chr6	93419640	0	1	PROMOTER	142.935	chr6:93419515-93419765	chr6	93419515	93419765	[142.93532, 57.05]	93	-	93419547	EPHA7	ENST00000369297.1	114	-	93419526	EPHA7	ENST00000369303.8
H929	2862	chr1	200483697	2.45	5	PROMOTER	8.25481	chr1:200483572-200483822	chr1	200483572	200483822	[1.61, 8.25481]	93	-	200483604	RP11-121P12.1	ENST00000635660.1
H929	22811	chr11	63888454	3	6	PROMOTER	7.98565	chr11:63888329-63888579	chr11	63888329	63888579	[4.46, 7.98565]	93	+	63888547	MARK2	ENST00000509502.6
H929	28327	chr16	80540641	9	18	PROMOTER	5.92863	chr16:80540516-80540766	chr16	80540516	80540766	[3.72, 5.92863]	93	+	80540734	DYNLRB2	ENST00000562982.5	229	-	80540870	RP11-525K10.3	ENST00000568819.5	306	-	80540947	RP11-525K10.3	ENST00000565050.5	316	+	80540957	DYNLRB2	ENST00000305904.10	352	+	80540993	DYNLRB2	ENST00000568035.5
H929	1697	chr1	158179853	5.48	11	PROMOTER	56.2387	chr1:158179728-158179978	chr1	158179728	158179978	[56.23872, 33.76]	94	+	158179947	CD1D	ENST00000368171.3
H929	18576	chr8	74052246	42.43	90	PROMOTER	21.8222	chr8:74052121-74052371	chr8	74052121	74052371	[12.37, 21.8222, 8.81]	94	+	74052340	RP11-6I2.3	ENST00000519323.1
H929	32800	chrX	49123895	1.41	3	PROMOTER	15.4907	chrX:49123770-49124020	chrX	49123770	49124020	[15.49068, 7.98]	94	-	49123801	GPKOW	ENST00000156109.6
H929	11421	chr5	56815479	2.45	5	PROMOTER	127.58	chr5:56815354-56815604	chr5	56815354	56815604	[99.72427, 127.58]	95	+	56815574	MAP3K1	ENST00000399503.3
H929	18913	chr8	95087829	11.49	23	PROMOTER	24.7453	chr8:95087704-95087954	chr8	95087704	95087954	[24.74533, 16.92]	95	-	95087924	RP11-320N21.2	ENST00000518598.1
H929	28952	chr17	47649933	5.48	11	PROMOTER	16.062	chr17:47649808-47650058	chr17	47649808	47650058	[5.12, 16.06205]	95	+	47649838	KPNB1	ENST00000290158.8	457	+	47649476	KPNB1	ENST00000535458.6	513	-	47649420	RP11-580I16.2	ENST00000584391.5	517	-	47649416	RP11-580I16.2	ENST00000580045.1	531	-	47649402	RP11-580I16.2	ENST00000582389.5	1263	+	47651196	KPNB1	ENST00000540627.5
H929	16873	chr7	104941111	3.46	7	PROMOTER	12.98	chr7:104940986-104941236	chr7	104940986	104941236	[11.93649, 12.98]	95	+	104941206	RP11-325F22.2	ENST00000417026.1
H929	14293	chr6	26659847	87.68	187	PROMOTER	8.25808	chr6:26659722-26659972	chr6	26659722	26659972	[3.79, 8.25808, 5.18]	95	-	26659752	ZNF322	ENST00000415922.6:ENST00000456172.5:ENST00000607204.5:ENST00000622479.4
H929	22544	chr11	29714004	0	0	PROMOTER	7.14927	chr11:29713879-29714129	chr11	29713879	29714129	[7.14927]	95	+	29713909	CTD-3138F19.1	ENST00000530249.1
H929	4806	chr2	100142671	5	10	PROMOTER	79.487	chr2:100142546-100142796	chr2	100142546	100142796	[79.487, 40.2]	96	-	100142575	AFF3	ENST00000317233.8
H929	14415	chr6	30617148	6.48	13	PROMOTER	20.0826	chr6:30617023-30617273	chr6	30617023	30617273	[15.45, 20.08259]	96	-	30617244	PPP1R10	ENST00000376511.6	561	+	30617709	MRPS18B	ENST00000259873.4
H929	28548	chr17	7579587	0	0	PROMOTER	18.4403	chr17:7579462-7579712	chr17	7579462	7579712	[14.38, 18.44031]	96	+	7579491	CD68	ENST00000380498.10	120	+	7579467	CD68	ENST00000250092.10	1632	+	7577955	SNORA67	ENST00000384423.1
H929	8023	chr3	149752595	3	6	PROMOTER	10.8683	chr3:149752470-149752720	chr3	149752470	149752720	[5.41, 10.86832]	96	-	149752499	COMMD2	ENST00000473414.5
H929	19038	chr8	100158524	0	0	PROMOTER	7.98621	chr8:100158399-100158649	chr8	100158399	100158649	[7.98621]	96	+	100158428	SPAG1	ENST00000388798.6	189	+	100158335	SPAG1	ENST00000520508.5	344	+	100158868	RF00019	ENST00000365440.1	489	+	100158035	SPAG1	ENST00000251809.4	618	+	100157906	SPAG1	ENST00000520643.5
H929	28717	chr17	28727028	0	0	PROMOTER	5.68548	chr17:28726903-28727153	chr17	28726903	28727153	[5.68548]	96	-	28726932	TLCD1	ENST00000394933.7	230	+	28727258	AC010761.14	ENST00000587898.1	820	-	28726208	TLCD1	ENST00000292090.7	1752	+	28728780	NEK8	ENST00000268766.10
H929	13011	chr5	140711178	2	4	PROMOTER	67.9878	chr5:140711053-140711303	chr5	140711053	140711303	[67.98783, 55.61]	97	+	140711275	VTRNA1-1	ENST00000363120.1
H929	18907	chr8	94719803	0	0	PROMOTER	22.1023	chr8:94719678-94719928	chr8	94719678	94719928	[22.10229]	97	+	94719900	DPY19L4	ENST00000414645.6
H929	14991	chr6	87702306	104	208	PROMOTER	8.93899	chr6:87702181-87702431	chr6	87702181	87702431	[5.34262, 8.93899]	97	-	87702209	AKIRIN2	ENST00000257787.5
H929	24672	chr12	47353657	0	0	PROMOTER	7.97	chr12:47353532-47353782	chr12	47353532	47353782	[7.97]	97	+	47353754	RP11-493L12.5	ENST00000550019.1
H929	32849	chrX	71532986	2.45	5	PROMOTER	5.15	chrX:71532861-71533111	chrX	71532861	71533111	[5.15, 4.00909]	97	+	71533083	OGT	ENST00000373719.7	137	+	71533123	OGT	ENST00000373701.7
H929	30653	chr19	12551627	0	0	PROMOTER	94.4012	chr19:12551502-12551752	chr19	12551502	12551752	[83.46, 94.40118]	98	-	12551529	ZNF564	ENST00000339282.11	153	-	12551474	CTD-2192J16.17	ENST00000428311.1	193	-	12551434	ZNF564	ENST00000416136.1	970	+	12552597	CTD-2192J16.11	ENST00000414548.1
H929	1400	chr1	151399436	25	50	PROMOTER	12.7677	chr1:151399311-151399561	chr1	151399311	151399561	[12.76767, 9.57]	98	+	151399534	PSMB4	ENST00000290541.6
H929	26652	chr14	95534702	0	0	PROMOTER	11.1871	chr14:95534577-95534827	chr14	95534577	95534827	[11.18711]	98	-	95534800	SNHG10	ENST00000500370.2	109	+	95534593	GLRX5	ENST00000331334.4	1073	-	95533629	SCARNA13	ENST00000516672.1
H929	32647	chrX	8171365	2.45	5	PROMOTER	9.39193	chrX:8171240-8171490	chrX	8171240	8171490	[9.39193, 2.01]	98	-	8171267	VCX2	ENST00000317103.5
H929	8862	chr4	26584014	6	12	PROMOTER	7.00838	chr4:26583889-26584139	chr4	26583889	26584139	[7.00838, 3.28]	98	+	26583916	TBC1D19	ENST00000264866.8	180	+	26584194	TBC1D19	ENST00000511789.5
H929	22017	chr10	110919034	96	192	PROMOTER	6.50139	chr10:110918909-110919159	chr10	110918909	110919159	[6.50139, 3.74565]	98	-	110918936	BBIP1	ENST00000605742.5	123	-	110919157	BBIP1	ENST00000423273.5:ENST00000436562.1	167	-	110919201	BBIP1	ENST00000447005.5:ENST00000454061.5	240	-	110919274	BBIP1	ENST00000448814.5	513	+	110919547	SHOC2	ENST00000369452.8
H929	24773	chr12	55020043	0	0	PROMOTER	6.00722	chr12:55019918-55020168	chr12	55019918	55020168	[6.00722]	98	+	55019945	NEUROD4	ENST00000242994.3
H929	32656	chrX	9463196	3	6	PROMOTER	35.6641	chrX:9463071-9463321	chrX	9463071	9463321	[10.48, 35.66411]	99	+	9463295	TBL1X	ENST00000407597.6:ENST00000424279.5	133	+	9463329	TBL1X	ENST00000380961.5	1812	+	9465008	TBL1X	ENST00000217964.11	1873	+	9465069	TBL1X	ENST00000645353.1
H929	26945	chr15	40593921	8.49	17	PROMOTER	12.5755	chr15:40593796-40594046	chr15	40593796	40594046	[12.57552, 11.5]	99	+	40594020	KNL1	ENST00000346991.9	328	+	40594249	KNL1	ENST00000399668.6:ENST00000527044.5
H929	27760	chr16	11965008	0	0	PROMOTER	9.02801	chr16:11964883-11965133	chr16	11964883	11965133	[9.02801]	99	+	11965107	TNFRSF17	ENST00000053243.5	205	+	11965213	TNFRSF17	ENST00000396495.3
H929	9813	chr4	131380112	0	0	PROMOTER	7.56	chr4:131379987-131380237	chr4	131379987	131380237	[7.56]	99	+	131380013	RP11-314N14.1	ENST00000500169.6
H929	16910	chr7	106285020	0	0	PROMOTER	5.06753	chr7:106284895-106285145	chr7	106284895	106285145	[5.06753]	99	-	106284921	NAMPT	ENST00000354289.8	172	-	106285192	NAMPT	ENST00000222553.7	460	+	106285480	RP11-22N19.2	ENST00000609281.1
H929	31095	chr19	54617059	3.46	7	PROMOTER	5.06748	chr19:54616934-54617184	chr19	54616934	54617184	[5.06748, 1.32]	99	+	54617158	LILRB1	ENST00000396331.5
H929	10369	chr4	184474680	5	10	PROMOTER	20.269	chr4:184474555-184474805	chr4	184474555	184474805	[20.26895, 17.89]	100	-	184474580	IRF2	ENST00000393593.7	122	+	184474802	RP11-326I11.3	ENST00000605834.1
H929	10607	chr5	6828021	2	4	PROMOTER	12.9284	chr5:6827896-6828146	chr5	6827896	6828146	[3.23, 12.92838]	100	-	6827921	MIR4278	ENST00000636094.1
H929	14721	chr6	52186487	0	0	PROMOTER	9.22241	chr6:52186362-52186612	chr6	52186362	52186612	[9.22241]	100	+	52186387	IL17A	ENST00000340057.1
H929	2882	chr1	202160091	1	2	PROMOTER	8.58605	chr1:202159966-202160216	chr1	202159966	202160216	[4.54, 8.58605]	100	-	202159991	PTPN7	ENST00000367279.8	487	-	202160578	PTPN7	ENST00000629151.2	1490	-	202161581	PTPN7	ENST00000309017.7
H929	4496	chr2	65366750	0	0	PROMOTER	6.75547	chr2:65366625-65366875	chr2	65366625	65366875	[6.75547]	100	-	65366650	SPRED2	ENST00000443619.6
H929	14450	chr6	31834508	0	0	PROMOTER	5.28742	chr6:31834383-31834633	chr6	31834383	31834633	[5.28742]	100	+	31834608	C6orf48	ENST00000375640.7	119	+	31834627	C6orf48	ENST00000375641.6	400	+	31834908	C6orf48	ENST00000375635.6:ENST00000375638.7:ENST00000375639.6	410	+	31834918	C6orf48	ENST00000375642.6	414	+	31834922	C6orf48	ENST00000614363.4	424	+	31834932	C6orf48	ENST00000395789.5	755	+	31835263	SNORD48	ENST00000364953.1	780	+
H929	30911	chr19	41859817	0	1	PROMOTER	8.59258	chr19:41859692-41859942	chr19	41859692	41859942	[7.44, 8.59258]	101	+	41859918	RPS19	ENST00000598742.5	438	+	41860255	RPS19	ENST00000600467.6	440	+	41860257	RPS19	ENST00000221975.6	629	+	41860446	RPS19	ENST00000593863.5
H929	1589	chr1	156338358	0	0	PROMOTER	5.62749	chr1:156338233-156338483	chr1	156338233	156338483	[5.62749]	101	-	156338257	CCT3	ENST00000472765.6	107	-	156338465	CCT3	ENST00000295688.7	113	-	156338245	CCT3	ENST00000368259.6	145	+	156338503	TSACC	ENST00000368253.6	149	+	156338507	TSACC	ENST00000470342.5	165	+	156338523	TSACC	ENST00000368254.5	270	+	156338628	TSACC	ENST00000481479.5	336	+
H929	14804	chr6	62286329	0	1	PROMOTER	253.01	chr6:62286204-62286454	chr6	62286204	62286454	[159.28558, 253.01]	102	-	62286227	KHDRBS2	ENST00000281156.4
H929	32798	chrX	48958488	0	1	PROMOTER	10.8526	chrX:48958363-48958613	chrX	48958363	48958613	[10.85259, 4.48]	102	-	48958386	OTUD5	ENST00000428668.2	594	-	48957894	OTUD5	ENST00000610466.4	794	-	48959282	RNU6-722P	ENST00000411377.1	857	-	48957631	OTUD5	ENST00000396743.7:ENST00000156084.8	889	-	48957599	OTUD5	ENST00000376488.7
H929	1292	chr1	147928495	0	0	PROMOTER	10.4314	chr1:147928370-147928620	chr1	147928370	147928620	[10.43143]	102	+	147928393	GPR89B	ENST00000314163.11
H929	30296	chr18	70384693	0	0	PROMOTER	7.49674	chr18:70384568-70384818	chr18	70384568	70384818	[7.49674]	102	-	70384591	RP11-41O4.2	ENST00000582251.1
H929	19671	chr8	133046478	2	4	PROMOTER	28.5893	chr8:133046353-133046603	chr8	133046353	133046603	[9.6, 28.58933]	103	-	133046581	MIR7848	ENST00000617402.1
H929	22370	chr11	9839040	5	10	PROMOTER	19.577	chr11:9838915-9839165	chr11	9838915	9839165	[5.77, 19.57695]	103	+	9839143	RP11-1H15.2	ENST00000533659.1
H929	30877	chr19	40716988	0	0	PROMOTER	15.8677	chr19:40716863-40717113	chr19	40716863	40717113	[4.78, 15.86774]	103	-	40716885	COQ8B	ENST00000324464.7	115	+	40717103	ITPKC	ENST00000263370.2	1915	-	40715073	COQ8B	ENST00000243583.10
H929	28814	chr17	36088396	1	2	PROMOTER	11.6488	chr17:36088271-36088521	chr17	36088271	36088521	[2.67, 11.64881]	103	+	36088293	AC069363.1	ENST00000616926.1	1745	-	36090141	CCL3	ENST00000613922.1
H929	1049	chr1	113905244	7	14	PROMOTER	10.2828	chr1:113905119-113905369	chr1	113905119	113905369	[10.28279, 4.1]	103	+	113905141	DCLRE1B	ENST00000369563.3	174	-	113905070	AP4B1	ENST00000256658.8	246	-	113904998	AP4B1	ENST00000369569.5	416	-	113904828	AP4B1	ENST00000369567.5
H929	20047	chr9	33290408	0	0	PROMOTER	9.64183	chr9:33290283-33290533	chr9	33290283	33290533	[9.64183]	103	+	33290511	NFX1	ENST00000379540.7	137	+	33290545	NFX1	ENST00000318524.6
H929	26526	chr14	90383468	0	0	PROMOTER	9.35705	chr14:90383343-90383593	chr14	90383343	90383593	[9.35705]	103	+	90383365	RP11-471B22.3	ENST00000615251.1
H929	32873	chrX	80809585	0	0	PROMOTER	6.08413	chrX:80809460-80809710	chrX	80809460	80809710	[6.08413]	103	-	80809688	BRWD3	ENST00000373275.4
H929	14950	chr6	83859539	5.48	11	PROMOTER	15.3399	chr6:83859414-83859664	chr6	83859414	83859664	[4.9, 15.33995]	104	+	83859643	CYB5R4	ENST00000369681.9	117	+	83859656	CYB5R4	ENST00000369679.4
H929	15266	chr6	110815741	108.5	217	PROMOTER	10.494	chr6:110815616-110815866	chr6	110815616	110815866	[10.49396, 2.07]	104	-	110815637	CDK19	ENST00000323817.7	425	-	110815316	CDK19	ENST00000368911.7	532	-	110815209	CDK19	ENST00000413605.6
H929	3102	chr1	211259175	104	208	PROMOTER	8.1241	chr1:211259050-211259300	chr1	211259050	211259300	[8.1241, 4.76495]	104	+	211259279	RCOR3	ENST00000367006.8	213	+	211259388	RCOR3	ENST00000452621.6	258	+	211259433	RCOR3	ENST00000419091.6	800	+	211259975	RCOR3	ENST00000367005.8
H929	976	chr1	109548507	0	0	PROMOTER	6.61694	chr1:109548382-109548632	chr1	109548382	109548632	[6.61694]	104	+	109548611	GNAI3	ENST00000369851.5
H929	23980	chr11	123060490	0	0	PROMOTER	6.47447	chr11:123060365-123060615	chr11	123060365	123060615	[6.47447]	104	-	123060386	HSPA8	ENST00000534319.5	841	-	123061331	HSPA8	ENST00000526110.5	842	-	123061332	HSPA8	ENST00000227378.7	1068	-	123059422	SNORD14C	ENST00000365382.1	1299	-	123061789	HSPA8	ENST00000532636.5	1495	-	123058995	SNORD14D	ENST00000384390.1	1646	-	123062136	HSPA8	ENST00000533540.5	1845	-
H929	1189	chr1	144412681	37.58	83	PROMOTER	52.8635	chr1:144412556-144412806	chr1	144412556	144412806	[31.4, 52.86347, 24.23]	105	+	144412576	RNVU1-15	ENST00000384476.1
H929	28657	chr17	17972708	4.47	9	PROMOTER	44.4724	chr17:17972583-17972833	chr17	17972583	17972833	[44.47239, 19.05]	105	+	17972813	DRC3	ENST00000313838.12	177	+	17972885	DRC3	ENST00000399187.5	181	+	17972889	DRC3	ENST00000584166.5	229	+	17972937	DRC3	ENST00000399182.5	288	-	17972420	TOM1L2	ENST00000535933.5	298	-	17972410	TOM1L2	ENST00000581396.5	304	-	17972404	TOM1L2	ENST00000395739.8	308	-
H929	22797	chr11	62841704	86.41	189	PROMOTER	41.4108	chr11:62841579-62841829	chr11	62841579	62841829	[18.2, 41.41084, 6.29531]	105	-	62841809	RNU2-2P	ENST00000410396.1	105	-	62841809	WDR74	ENST00000525239.5	1324	-	62840380	WDR74	ENST00000525752.5	1548	-	62840156	WDR74	ENST00000529106.5
H929	1030	chr1	112674850	11	22	PROMOTER	7.14927	chr1:112674725-112674975	chr1	112674725	112674975	[7.14927, 3.47]	105	+	112674745	MOV10	ENST00000357443.2	152	+	112674698	MOV10	ENST00000369644.5	363	+	112674487	MOV10	ENST00000369645.5	429	+	112674421	MOV10	ENST00000413052.6
H929	30838	chr19	38374431	0	0	PROMOTER	6.39951	chr19:38374306-38374556	chr19	38374306	38374556	[6.39951]	105	+	38374536	PSMD8	ENST00000215071.8	119	+	38374550	PSMD8	ENST00000620216.4	327	+	38374758	PSMD8	ENST00000585598.1	328	+	38374759	PSMD8	ENST00000602911.5	578	+	38375009	PSMD8	ENST00000592035.5
H929	27629	chr16	527750	6.48	13	PROMOTER	22.1023	chr16:527625-527875	chr16	527625	527875	[8.83, 22.10229]	106	+	527856	CAPN15	ENST00000219611.6	343	-	527407	LINC00235	ENST00000622160.1
H929	14221	chr6	26027146	79.43	169	PROMOTER	15.0741	chr6:26027021-26027271	chr6	26027021	26027271	[2.33, 15.07411, 6.66]	106	-	26027252	HIST1H4B	ENST00000377745.3
H929	20430	chr9	92877902	0	0	PROMOTER	6.50139	chr9:92877777-92878027	chr9	92877777	92878027	[6.50139]	106	-	92878008	ZNF484	ENST00000375495.7	120	-	92878022	ZNF484	ENST00000332591.6	136	-	92878038	ZNF484	ENST00000395505.6:ENST00000395506.7
H929	16137	chr7	26200900	34.1	79	PROMOTER	106.59	chr7:26200775-26201025	chr7	26200775	26201025	[106.3, 91.16665, 106.59]	107	-	26200793	HNRNPA2B1	ENST00000618183.4	154	-	26200746	HNRNPA2B1	ENST00000354667.8:ENST00000356674.7	262	+	26201162	CBX3	ENST00000337620.8	793	+	26201693	CBX3	ENST00000396386.6	865	+	26201765	CBX3	ENST00000409747.5
H929	27979	chr16	30923377	0	0	PROMOTER	11.1871	chr16:30923252-30923502	chr16	30923252	30923502	[11.18711]	108	-	30923269	FBXL19-AS1	ENST00000563777.1	306	+	30923071	FBXL19	ENST00000471231.6	720	+	30924097	FBXL19	ENST00000338343.8	1198	+	30924575	FBXL19	ENST00000562319.5:ENST00000380310.6
H929	10375	chr4	184734241	0	0	PROMOTER	10.4233	chr4:184734116-184734366	chr4	184734116	184734366	[10.42334]	108	-	184734133	CENPU	ENST00000281453.9
H929	26135	chr14	55271194	0	0	PROMOTER	13.3431	chr14:55271069-55271319	chr14	55271069	55271319	[13.34312]	109	+	55271303	FBXO34	ENST00000313833.4	114	-	55271308	RP11-665C16.6	ENST00000554650.1	960	+	55272154	FBXO34	ENST00000440021.1
H929	18406	chr8	66113396	1	2	PROMOTER	11.5851	chr8:66113271-66113521	chr8	66113271	66113521	[11.58514, 5.88]	109	+	66113287	AC084082.3	ENST00000517961.3
H929	5434	chr2	168890336	0	0	PROMOTER	8.10232	chr2:168890211-168890461	chr2	168890211	168890461	[3.39, 8.10232]	109	-	168890445	SPC25	ENST00000282074.6
H929	16265	chr7	35801149	14.07	33	PROMOTER	125.43	chr7:35801024-35801274	chr7	35801024	35801274	[80.11, 125.43, 42.86]	110	+	35801039	SEPT7	ENST00000435235.6	163	+	35800986	2007-09-01	ENST00000350320.10	217	+	35800932	2007-09-01	ENST00000399034.7	543	-	35800606	AC007551.3	ENST00000437235.7	561	-	35800588	AC007551.3	ENST00000412856.5
H929	23354	chr11	102347104	40.3	92	PROMOTER	25.0264	chr11:102346979-102347229	chr11	102346979	102347229	[5.06, 25.02635, 15.65]	110	+	102347214	BIRC2	ENST00000530675.5	131	+	102347235	BIRC2	ENST00000227758.6	143	+	102347247	BIRC2	ENST00000532672.5	270	+	102347374	BIRC2	ENST00000621637.1:ENST00000613397.4
H929	31765	chr20	53940050	5.48	11	PROMOTER	15.5548	chr20:53939925-53940175	chr20	53939925	53940175	[15.55476, 5.91]	110	+	53940160	AC005220.3	ENST00000450473.1
H929	1232	chr1	146052134	94.22	225	PROMOTER	15.26	chr1:146052009-146052259	chr1	146052009	146052259	[15.26, 11.6, 12.50054]	110	-	146052244	RNVU1-6	ENST00000364688.1	469	+	146052603	RP11-458D21.1	ENST00000611275.4
H929	13028	chr5	141618304	0	0	PROMOTER	10.2396	chr5:141618179-141618429	chr5	141618179	141618429	[10.23958]	110	+	141618414	AC008781.7	ENST00000422040.2	610	-	141618914	DIAPH1	ENST00000518047.5	751	-	141619055	DIAPH1	ENST00000389054.7:ENST00000647433.1:ENST00000253811.10:ENST00000389057.9:ENST00000398557.8
H929	24384	chr12	4604834	2.45	5	PROMOTER	8.67833	chr12:4604709-4604959	chr12	4604709	4604959	[8.33, 8.67833]	110	+	4604944	RP11-500M8.7	ENST00000536588.1
H929	26969	chr15	44288621	0	0	PROMOTER	7.62223	chr15:44288496-44288746	chr15	44288496	44288746	[7.62223]	110	+	44288731	CASC4	ENST00000299957.10	139	+	44288760	CASC4	ENST00000345795.6
H929	25632	chr12	132986354	0	0	PROMOTER	7.1142	chr12:132986229-132986479	chr12	132986229	132986479	[7.1142]	110	+	132986464	ZNF26	ENST00000328654.9
H929	18430	chr8	67062427	0	0	PROMOTER	5.34262	chr8:67062302-67062552	chr8	67062302	67062552	[5.34262]	110	-	67062317	COPS5	ENST00000357849.8	1941	+	67064368	CSPP1	ENST00000262210.9
H929	2588	chr1	179882807	1	2	PROMOTER	42.38	chr1:179882682-179882932	chr1	179882682	179882932	[42.38, 39.49032]	111	+	179882696	TOR1AIP1	ENST00000435319.8	212	-	179882595	RP11-533E19.7	ENST00000610272.1	495	+	179882312	TOR1AIP1	ENST00000606911.6	510	+	179882297	TOR1AIP1	ENST00000271583.7	765	+	179882042	TOR1AIP1	ENST00000528443.6
H929	27466	chr15	88639052	0	0	PROMOTER	10.3872	chr15:88638927-88639177	chr15	88638927	88639177	[10.38715]	111	+	88638941	ISG20	ENST00000379224.9	309	+	88638743	ISG20	ENST00000306072.9
H929	20426	chr9	92670376	6	12	PROMOTER	9.73542	chr9:92670251-92670501	chr9	92670251	92670501	[8.13, 9.73542]	111	-	92670265	IPPK	ENST00000287996.7
H929	14589	chr6	41895472	0	0	PROMOTER	6.03541	chr6:41895347-41895597	chr6	41895347	41895597	[6.03541]	111	-	41895361	USP49	ENST00000373006.5	1312	-	41894160	USP49	ENST00000394253.7
H929	29086	chr17	58631724	2	4	PROMOTER	30.3122	chr17:58631599-58631849	chr17	58631599	58631849	[12.32, 30.31219]	112	-	58631836	RF00012	ENST00000390893.2
H929	17992	chr8	42052099	73.8	159	PROMOTER	13.9651	chr8:42051974-42052224	chr8	42051974	42052224	[9.33, 13.96507, 7.2]	112	-	42051987	KAT6A	ENST00000265713.6:ENST00000396930.3:ENST00000406337.5:ENST00000485568.5
H929	22192	chr10	124093719	3	6	PROMOTER	10.9152	chr10:124093594-124093844	chr10	124093594	124093844	[6.08, 10.91524]	112	-	124093607	CHST15	ENST00000435907.5	1265	-	124092454	CHST15	ENST00000346248.7	1305	-	124092414	CHST15	ENST00000628426.1
H929	5830	chr2	199955491	0	0	PROMOTER	9.37923	chr2:199955366-199955616	chr2	199955366	199955616	[9.37923]	112	+	199955603	MAIP1	ENST00000392290.5	174	+	199955317	MAIP1	ENST00000295079.6	245	-	199955736	TYW5	ENST00000354611.8
H929	9015	chr4	42151140	0	0	PROMOTER	8.25481	chr4:42151015-42151265	chr4	42151015	42151265	[8.25481]	112	+	42151028	RP11-63A11.2	ENST00000645181.1	1043	-	42152183	BEND4	ENST00000611697.1	1738	-	42152878	BEND4	ENST00000502486.5:ENST00000504360.5
H929	4259	chr2	41953916	0	0	PROMOTER	18.8205	chr2:41953791-41954041	chr2	41953791	41954041	[11.92, 18.82045]	113	-	41953803	C2orf91	ENST00000378711.2	621	-	41953295	C2orf91	ENST00000615044.1
H929	2915	chr1	203682922	4.47	9	PROMOTER	18.5466	chr1:203682797-203683047	chr1	203682797	203683047	[18.54663, 8.21]	113	+	203682809	ATP2B4	ENST00000341360.6
H929	24767	chr12	54364600	11.49	23	PROMOTER	6.58328	chr12:54364475-54364725	chr12	54364475	54364725	[6.58328, 3.79]	113	-	54364487	GPR84	ENST00000551809.1	126	-	54364474	GPR84	ENST00000267015.3
H929	13577	chr5	166926256	26.59	65	PROMOTER	16.1447	chr5:166926131-166926381	chr5	166926131	166926381	[7.2, 16.14474, 6.38]	114	-	166926370	LINC01947	ENST00000523742.1
H929	5242	chr2	150487808	0	0	PROMOTER	6.49584	chr2:150487683-150487933	chr2	150487683	150487933	[6.49584]	114	-	150487694	RND3	ENST00000263895.8	141	-	150487667	RND3	ENST00000375734.6
H929	29337	chr17	76671827	1.41	3	PROMOTER	43.7812	chr17:76671702-76671952	chr17	76671702	76671952	[43.78121, 35.17]	115	+	76671942	RP11-318A15.2	ENST00000565271.1
H929	24854	chr12	64759636	7	14	PROMOTER	38.3058	chr12:64759511-64759761	chr12	64759511	64759761	[38.30581, 7.2]	115	+	64759521	RP11-629N8.3	ENST00000434563.3	189	-	64759447	GNS	ENST00000258145.7	205	-	64759431	GNS	ENST00000542058.5	230	-	64759406	GNS	ENST00000543646.5
H929	3062	chr1	209686065	1	2	PROMOTER	27.3288	chr1:209685940-209686190	chr1	209685940	209686190	[14.15, 27.32876]	115	+	209686180	HSD11B1	ENST00000367028.6
H929	540	chr1	42335347	7	14	PROMOTER	10.494	chr1:42335222-42335472	chr1	42335222	42335472	[10.49396, 6.07]	115	-	42335232	FOXJ3	ENST00000361346.5	132	-	42335215	FOXJ3	ENST00000361776.5	382	-	42334965	FOXJ3	ENST00000372572.5	530	-	42335877	FOXJ3	ENST00000372573.5
H929	32050	chr21	35049183	0	0	PROMOTER	10.4156	chr21:35049058-35049308	chr21	35049058	35049308	[10.41562]	115	-	35049298	RUNX1	ENST00000437180.5	161	-	35049344	RUNX1	ENST00000300305.7
H929	32544	chrM	9322	0	0	PROMOTER	10.2692	chrM:9197-9447	chrM	9197	9447	[10.26922]	115	+	9207	MT-CO3	ENST00000362079.2	669	+	9991	MT-TG	ENST00000387429.1	737	+	10059	MT-ND3	ENST00000361227.2	795	+	8527	MT-ATP6	ENST00000361899.2	956	+	8366	MT-ATP8	ENST00000361851.1	1027	+	8295	MT-TK	ENST00000387421.1	1083	+	10405	MT-TR	ENST00000387439.1	1148	+
H929	9812	chr4	131379898	1	2	PROMOTER	10.2597	chr4:131379773-131380023	chr4	131379773	131380023	[10.25968, 4.29]	115	+	131380013	RP11-314N14.1	ENST00000500169.6
H929	8336	chr3	177442081	2.45	5	PROMOTER	18.254	chr3:177441956-177442206	chr3	177441956	177442206	[7.29, 18.25404]	117	+	177441964	RP11-335L9.1	ENST00000439009.1	160	+	177441921	RP11-335L9.1	ENST00000442937.5
H929	11996	chr5	88883583	4	8	PROMOTER	7.79235	chr5:88883458-88883708	chr5	88883458	88883708	[7.79235, 4.6]	117	-	88883466	MEF2C	ENST00000437473.6	119	-	88883464	MEF2C	ENST00000504921.6	164	-	88883747	MEF2C	ENST00000636998.1	166	+	88883417	CTC-454M9.1	ENST00000512585.5	184	+	88883399	CTC-454M9.1	ENST00000514794.6	255	+	88883328	CTC-454M9.1	ENST00000511100.5	359	-	88883224	MEF2C	ENST00000514015.5	399	-
H929	32424	chr22	40436193	4	8	PROMOTER	7.66674	chr22:40436068-40436318	chr22	40436068	40436318	[7.66674, 2.31]	117	-	40436310	MKL1	ENST00000614754.4:ENST00000620651.4
H929	22470	chr11	18634376	0	0	PROMOTER	5.638	chr11:18634251-18634501	chr11	18634251	18634501	[5.638]	117	-	18634493	SPTY2D1	ENST00000336349.5
H929	19733	chr8	144104381	1.41	3	PROMOTER	119.838	chr8:144104256-144104506	chr8	144104256	144104506	[119.8379, 109.35]	118	+	144104499	MAF1	ENST00000322428.9	131	+	144104512	MAF1	ENST00000534585.5	191	-	144104190	SHARPIN	ENST00000398712.6	594	+	144104975	MAF1	ENST00000532522.5
H929	4133	chr2	33476346	0	0	PROMOTER	10.8081	chr2:33476221-33476471	chr2	33476221	33476471	[10.8081]	118	+	33476228	RASGRP3	ENST00000403687.7
H929	31818	chr20	56577681	0	0	PROMOTER	5.06753	chr20:56577556-56577806	chr20	56577556	56577806	[5.06753]	118	+	56577563	RP5-843L14.1	ENST00000434176.1
H929	8569	chr4	124361	4.47	9	PROMOTER	57.4709	chr4:124236-124486	chr4	124236	124486	[57.47089, 28.56]	119	+	124480	ZNF718	ENST00000510175.5	177	+	124538	ZNF718	ENST00000609714.1
H929	24550	chr12	29317967	11	22	PROMOTER	6.08413	chr12:29317842-29318092	chr12	29317842	29318092	[6.08413, 1.4]	119	-	29317848	RP11-996F15.2	ENST00000553105.1
H929	18393	chr8	65842072	5	10	PROMOTER	43.9738	chr8:65841947-65842197	chr8	65841947	65842197	[43.97383, 19.89]	120	-	65841952	PDE7A	ENST00000401827.7	564	-	65841508	PDE7A	ENST00000396642.7	680	+	65842752	CTD-2532N20.1	ENST00000607622.1
H929	26588	chr14	91715010	3	6	PROMOTER	19.9074	chr14:91714885-91715135	chr14	91714885	91715135	[19.90742, 6.37]	120	-	91715130	RF00012	ENST00000363172.2
H929	20138	chr9	62801345	92.5	185	PROMOTER	7.2732	chr9:62801220-62801470	chr9	62801220	62801470	[6.42176, 7.2732]	120	+	62801465	RP11-262H14.1	ENST00000424345.5	1093	-	62802438	RNA5SP283	ENST00000365604.1
H929	28815	chr17	36090262	8.49	17	PROMOTER	24.2574	chr17:36090137-36090387	chr17	36090137	36090387	[24.25745, 19.52]	121	-	36090141	CCL3	ENST00000613922.1	1969	+	36088293	AC069363.1	ENST00000616926.1
H929	1318	chr1	149636887	0	0	PROMOTER	20.6481	chr1:149636762-149637012	chr1	149636762	149637012	[20.64814]	121	+	149636766	RF00003	ENST00000384101.1
H929	2346	chr1	172532594	3.46	7	PROMOTER	9.78101	chr1:172532469-172532719	chr1	172532469	172532719	[9.6, 9.78101]	121	+	172532473	SUCO	ENST00000608151.5	245	+	172532349	SUCO	ENST00000367723.8	524	+	172533118	SUCO	ENST00000616058.4	589	+	172533183	SUCO	ENST00000610051.5	623	+	172533217	SUCO	ENST00000263688.3
H929	23855	chr11	119031027	0	0	PROMOTER	9.59646	chr11:119030902-119031152	chr11	119030902	119031152	[9.59646]	121	-	119030906	SLC37A4	ENST00000330775.9:ENST00000357590.9:ENST00000538950.5:ENST00000545985.5
H929	10855	chr5	18746294	0	0	PROMOTER	7.55339	chr5:18746169-18746419	chr5	18746169	18746419	[7.55339]	121	-	18746173	CTD-2023M8.1	ENST00000512978.1
H929	21480	chr10	63269187	0	0	PROMOTER	6.08413	chr10:63269062-63269312	chr10	63269062	63269312	[6.08413]	121	-	63269066	JMJD1C	ENST00000542921.5
H929	13010	chr5	140700456	0	0	PROMOTER	10.8683	chr5:140700331-140700581	chr5	140700331	140700581	[4.83, 10.86832]	122	+	140700334	ZMAT2	ENST00000274712.7
H929	26100	chr14	51240290	4.47	9	PROMOTER	8.1241	chr14:51240165-51240415	chr14	51240165	51240415	[3.68, 8.1241]	122	+	51240168	TMX1	ENST00000457354.6
H929	30967	chr19	45423717	0	0	PROMOTER	7.98565	chr19:45423592-45423842	chr19	45423592	45423842	[7.98565]	122	-	45423839	ERCC1	ENST00000340192.11	151	-	45423566	ERCC1	ENST00000013807.9	216	-	45423501	ERCC1	ENST00000591636.5	648	-	45424365	ERCC1	ENST00000300853.7	650	-	45424367	ERCC1	ENST00000589165.5
H929	3415	chr1	227563665	0	0	PROMOTER	6.5794	chr1:227563540-227563790	chr1	227563540	227563790	[6.5794]	122	+	227563543	ZNF678	ENST00000608949.5:ENST00000343776.9
H929	15275	chr6	111794008	2	4	PROMOTER	6.03541	chr6:111793883-111794133	chr6	111793883	111794133	[6.03541, 4.26]	122	-	111793886	FYN	ENST00000368667.6
H929	20858	chr9	131393970	5	10	PROMOTER	11.1871	chr9:131393845-131394095	chr9	131393845	131394095	[6.4, 11.18711]	123	+	131394093	PRRC2B	ENST00000405995.5	243	+	131394213	PRRC2B	ENST00000638390.1
H929	4952	chr2	112275471	0	0	PROMOTER	7.87189	chr2:112275346-112275596	chr2	112275346	112275596	[7.87189]	123	+	112275594	ZC3H6	ENST00000409871.5	130	+	112275601	ZC3H6	ENST00000343936.4
H929	1397	chr1	151282188	8.49	17	PROMOTER	92.99	chr1:151282063-151282313	chr1	151282063	151282313	[92.99, 59.24905]	124	+	151282312	ZNF687	ENST00000324048.9	259	-	151281929	RP11-126K1.2	ENST00000447795.3
H929	4027	chr2	25420993	4	8	PROMOTER	14.1483	chr2:25420868-25421118	chr2	25420868	25421118	[2.44, 14.1483]	124	+	25421117	AC104699.1	ENST00000352271.6
H929	22170	chr10	123154153	0	0	PROMOTER	5.79067	chr10:123154028-123154278	chr10	123154028	123154278	[5.79067]	124	+	123154277	BUB3	ENST00000368865.8	249	+	123154402	BUB3	ENST00000368859.6	262	+	123154415	BUB3	ENST00000368858.9
H929	25720	chr13	42812438	0	1	PROMOTER	5.06748	chr13:42812313-42812563	chr13	42812313	42812563	[2.0, 5.06748]	124	-	42812562	RP11-366O17.4	ENST00000604485.1
H929	28799	chr17	35063727	70.1	153	PROMOTER	28.113	chr17:35063602-35063852	chr17	35063602	35063852	[4.15, 14.23, 28.11301]	125	-	35063852	RFFL	ENST00000394597.6
H929	14229	chr6	26103751	4.47	9	PROMOTER	7.33915	chr6:26103626-26103876	chr6	26103626	26103876	[7.33915, 1.52]	125	+	26103876	HIST1H4C	ENST00000377803.3
H929	23842	chr11	118436364	10.49	21	PROMOTER	10.0844	chr11:118436239-118436489	chr11	118436239	118436489	[10.08439, 4.49]	126	+	118436490	KMT2A	ENST00000534358.5	149	+	118436513	KMT2A	ENST00000389506.9	1158	-	118435206	RP11-770J1.4	ENST00000532619.1
H929	12184	chr5	96935935	2	4	PROMOTER	8.71	chr5:96935810-96936060	chr5	96935810	96936060	[8.71, 8.58751]	126	-	96935809	CTD-2260A17.2	ENST00000501338.5	471	+	96935464	LNPEP	ENST00000231368.9
H929	17239	chr7	139778122	0	0	PROMOTER	7.87189	chr7:139777997-139778247	chr7	139777997	139778247	[7.87189]	126	+	139778248	TBXAS1	ENST00000425687.5:ENST00000416849.6	278	+	139778400	TBXAS1	ENST00000336425.9	344	-	139777778	HIPK2	ENST00000428878.6	404	-	139777718	HIPK2	ENST00000406875.7
H929	29895	chr18	50967865	0	0	PROMOTER	5.35669	chr18:50967740-50967990	chr18	50967740	50967990	[5.35669]	126	+	50967991	ELAC1	ENST00000588577.5	151	+	50968016	ELAC1	ENST00000269466.7	154	+	50968019	RP11-729L2.2	ENST00000590722.2	183	+	50968048	ELAC1	ENST00000591429.1
H929	23155	chr11	93742072	10.49	21	PROMOTER	9.55041	chr11:93741947-93742197	chr11	93741947	93742197	[9.55041, 6.66]	127	-	93741945	TAF1D	ENST00000448108.6	403	+	93741669	C11orf54	ENST00000354421.7	408	+	93741664	RP11-606E8.2	ENST00000638767.1	413	+	93741659	C11orf54	ENST00000528099.5	430	+	93741642	C11orf54	ENST00000331239.8	478	+	93741594	C11orf54	ENST00000540113.5:ENST00000617482.4	481	+	93741591	C11orf54	ENST00000528288.5
H929	1604	chr1	156661551	0	0	PROMOTER	8.57326	chr1:156661426-156661676	chr1	156661426	156661676	[8.57326]	127	-	156661424	RP11-284F21.7	ENST00000448869.1
H929	19923	chr9	19380381	3.46	7	PROMOTER	6.39	chr9:19380256-19380506	chr9	19380256	19380506	[6.39, 4.57007]	127	-	19380254	RPS6	ENST00000380394.8	145	-	19380236	RPS6	ENST00000380381.3	175	-	19380206	RPS6	ENST00000380384.5	183	-	19380198	RPS6	ENST00000315377.4
H929	1399	chr1	151347484	0	0	PROMOTER	5.47268	chr1:151347359-151347609	chr1	151347359	151347609	[5.47268]	127	-	151347357	RFX5	ENST00000452671.6	158	-	151347326	RFX5	ENST00000368870.6	233	-	151347251	RFX5	ENST00000290524.8	517	+	151346967	RP11-126K1.6	ENST00000455503.1
H929	32455	chr22	42615372	4.47	9	PROMOTER	38.3611	chr22:42615247-42615497	chr22	42615247	42615497	[38.3611, 30.82]	128	+	42615244	RNU12	ENST00000362512.1:ENST00000602478.1	410	-	42614962	POLDIP3	ENST00000252115.9:ENST00000451060.6	441	-	42614931	POLDIP3	ENST00000348657.6	461	-	42614911	POLDIP3	ENST00000617178.4	515	-	42614857	POLDIP3	ENST00000339677.10
H929	25471	chr12	121391834	4	8	PROMOTER	17.7703	chr12:121391709-121391959	chr12	121391709	121391959	[4.07, 17.7703]	128	+	121391962	RP11-711D18.2	ENST00000557474.1
H929	28838	chr17	38825353	2.45	5	PROMOTER	11.6925	chr17:38825228-38825478	chr17	38825228	38825478	[11.69249, 4.51]	128	-	38825481	CWC25	ENST00000614790.4	485	+	38825838	MIR4727	ENST00000622232.1
H929	25877	chr13	113449270	9	18	PROMOTER	11.6488	chr13:113449145-113449395	chr13	113449145	113449395	[11.64881, 4.94]	128	-	113449142	ADPRHL1	ENST00000356501.8
H929	5376	chr2	161160565	0	0	PROMOTER	5.92754	chr2:161160440-161160690	chr2	161160440	161160690	[5.92754]	128	+	161160437	TANK	ENST00000405852.5	216	+	161160349	TANK	ENST00000402568.5:ENST00000406287.5	268	+	161160297	TANK	ENST00000392749.6	341	-	161160224	AC009313.1	ENST00000425470.1
H929	14484	chr6	33314084	0	0	PROMOTER	5.07554	chr6:33313959-33314209	chr6	33313959	33314209	[5.07554]	128	-	33314212	TAPBP	ENST00000426633.6	167	-	33314251	TAPBP	ENST00000475304.5	170	-	33314254	TAPBP	ENST00000489157.5	303	-	33314387	TAPBP	ENST00000434618.6:ENST00000456592.3
H929	30503	chr19	4246950	2.45	5	PROMOTER	19.2487	chr19:4246825-4247075	chr19	4246825	4247075	[12.2, 19.24871]	129	+	4247079	YJU2	ENST00000262962.11	408	-	4247358	AC005578.3	ENST00000622962.1
H929	20231	chr9	76459023	0	0	PROMOTER	6.84445	chr9:76458898-76459148	chr9	76458898	76459148	[6.84445]	129	+	76459152	GCNT1	ENST00000444201.6	207	+	76459230	GCNT1	ENST00000376730.4
H929	28583	chr17	9575966	0	0	PROMOTER	5.99645	chr17:9575841-9576091	chr17	9575841	9576091	[5.99645]	129	-	9575837	STX8	ENST00000574431.5	270	-	9576236	STX8	ENST00000306357.8	661	+	9576627	CFAP52	ENST00000396219.7:ENST00000352665.9	716	+	9576682	CFAP52	ENST00000576499.1
H929	30375	chr18	75210884	0	0	PROMOTER	5.35946	chr18:75210759-75211009	chr18	75210759	75211009	[5.35946]	129	+	75210755	TSHZ1	ENST00000322038.5	645	+	75211529	TSHZ1	ENST00000580243.2	1536	-	75209348	ZADH2	ENST00000322342.3
H929	1815	chr1	160711674	0	0	PROMOTER	5.34262	chr1:160711549-160711799	chr1	160711549	160711799	[5.34262]	129	-	160711803	CD48	ENST00000368045.3	157	-	160711831	CD48	ENST00000613788.1	177	-	160711851	CD48	ENST00000368046.7
H929	4917	chr2	110678244	2	4	PROMOTER	10.4161	chr2:110678119-110678369	chr2	110678119	110678369	[6.84, 10.41612]	130	-	110678114	BUB1	ENST00000302759.10	137	-	110678107	BUB1	ENST00000535254.5	181	-	110678063	BUB1	ENST00000409311.5
H929	1384	chr1	150876898	0	0	PROMOTER	9.85345	chr1:150876773-150877023	chr1	150876773	150877023	[9.85345]	130	-	150876768	ARNT	ENST00000358595.9	190	-	150876708	ARNT	ENST00000515192.5	289	-	150876609	ARNT	ENST00000505755.5	319	-	150876579	ARNT	ENST00000354396.6
H929	3345	chr1	222644433	92	184	PROMOTER	8.58605	chr1:222644308-222644558	chr1	222644308	222644558	[8.58605, 1.50598]	130	+	222644303	MIA3	ENST00000340535.11
H929	16523	chr7	56106706	0	0	PROMOTER	7.9483	chr7:56106581-56106831	chr7	56106581	56106831	[7.9483]	130	-	56106576	CHCHD2	ENST00000395422.3
H929	25144	chr12	96485311	0	1	PROMOTER	8.70259	chr12:96485186-96485436	chr12	96485186	96485436	[3.39, 8.70259]	131	-	96485442	RP11-510I5.4	ENST00000548740.1
H929	21553	chr10	74826468	0	0	PROMOTER	82.9023	chr10:74826343-74826593	chr10	74826343	74826593	[57.52, 82.90228]	132	+	74826600	KAT6B	ENST00000372724.5	157	+	74826625	KAT6B	ENST00000287239.8	174	+	74826642	KAT6B	ENST00000372714.5	886	+	74825582	KAT6B	ENST00000372725.5
H929	14457	chr6	32190318	9.49	19	PROMOTER	9.22244	chr6:32190193-32190443	chr6	32190193	32190443	[3.31, 9.22244]	132	-	32190186	PBX2	ENST00000375050.5
H929	28961	chr17	48048226	4.47	9	PROMOTER	23.368	chr17:48048101-48048351	chr17	48048101	48048351	[9.74, 23.36797]	133	+	48048359	NFE2L1	ENST00000362042.7	137	+	48048363	NFE2L1	ENST00000585291.5	144	+	48048370	NFE2L1	ENST00000357480.9	153	-	48048073	RP5-890E16.2	ENST00000584428.1	547	+	48048773	NFE2L1	ENST00000361665.7
H929	4488	chr2	64988357	0	0	PROMOTER	10.2164	chr2:64988232-64988482	chr2	64988232	64988482	[10.21642]	133	+	64988490	SLC1A4	ENST00000531327.5	1044	+	64989401	SLC1A4	ENST00000234256.3
H929	25926	chr14	22502098	3.46	7	PROMOTER	6.08413	chr14:22501973-22502223	chr14	22501973	22502223	[1.4, 6.08413]	133	+	22502231	TRAJ38	ENST00000390499.1	497	+	22501601	TRAJ39	ENST00000390498.1	1652	+	22503750	TRAJ37	ENST00000612375.1
H929	14487	chr6	33391403	3.46	7	PROMOTER	5.07	chr6:33391278-33391528	chr6	33391278	33391528	[4.12506, 5.07]	133	+	33391536	KIFC1	ENST00000428849.6
H929	30619	chr19	10654127	6.48	13	PROMOTER	17.324	chr19:10654002-10654252	chr19	10654002	10654252	[17.32403, 7.05]	134	+	10654261	ILF3	ENST00000449870.5	201	+	10654328	ILF3	ENST00000407004.7	234	+	10654361	ILF3	ENST00000589998.5	283	-	10653844	CTC-539A10.4	ENST00000591501.1
H929	3152	chr1	213051099	112.5	225	PROMOTER	12.0628	chr1:213050974-213051224	chr1	213050974	213051224	[4.9, 12.06276]	134	+	213051233	RPS6KC1	ENST00000543354.5:ENST00000543470.5:ENST00000614059.4:ENST00000615329.4	156	+	213051255	RPS6KC1	ENST00000366959.4:ENST00000366960.7
H929	8270	chr3	172039494	0	0	PROMOTER	9.38617	chr3:172039369-172039619	chr3	172039369	172039619	[9.38617]	134	+	172039628	FNDC3B	ENST00000421757.5:ENST00000415807.6	1060	+	172040554	FNDC3B	ENST00000336824.8	1061	+	172040555	FNDC3B	ENST00000423424.5
H929	22062	chr10	113854234	6	12	PROMOTER	8.96397	chr10:113854109-113854359	chr10	113854109	113854359	[8.96397, 4.68]	134	-	113854100	DCLRE1A	ENST00000361384.6	149	-	113854383	DCLRE1A	ENST00000369305.1	427	+	113854661	NHLRC2	ENST00000369301.3
H929	30577	chr19	8390065	74.5	149	PROMOTER	8.23	chr19:8389940-8390190	chr19	8389940	8390190	[4.05, 8.23]	134	+	8390199	RAB11B	ENST00000328024.10	324	+	8390389	RAB11B	ENST00000601897.1	328	+	8390393	RAB11B	ENST00000594216.1	620	-	8390685	RP11-886P16.3	ENST00000593581.5	685	-	8389380	MIR4999	ENST00000585029.1
H929	1556	chr1	155244834	6	12	PROMOTER	45.0014	chr1:155244709-155244959	chr1	155244709	155244959	[45.00137, 30.69]	135	-	155244699	GBA	ENST00000428024.3	164	-	155244670	GBA	ENST00000327247.9
H929	7650	chr3	120094552	4	8	PROMOTER	38.3578	chr3:120094427-120094677	chr3	120094427	120094677	[16.0, 38.35778]	135	-	120094417	GSK3B	ENST00000264235.12	343	+	120094895	RP11-18H7.1	ENST00000484076.1	718	+	120095270	RP11-18H7.1	ENST00000469070.1	886	-	120093666	GSK3B	ENST00000316626.5
H929	29573	chr18	14132565	6	12	PROMOTER	29.5842	chr18:14132440-14132690	chr18	14132440	14132690	[29.5842, 9.0]	135	-	14132430	ZNF519	ENST00000590202.2	137	-	14132428	ZNF519	ENST00000589498.5
H929	24355	chr12	2890762	0	0	PROMOTER	25.8808	chr12:2890637-2890887	chr12	2890637	2890887	[25.88076]	135	+	2890897	TULP3	ENST00000448120.6	145	+	2890907	TULP3	ENST00000397132.6
H929	28708	chr17	27471875	1	2	PROMOTER	13.5231	chr17:27471750-27472000	chr17	27471750	27472000	[2.86, 13.52308]	135	+	27472010	KSR1	ENST00000509603.6:ENST00000268763.10:ENST00000398988.7
H929	22882	chr11	66958511	0	0	PROMOTER	10.586	chr11:66958386-66958636	chr11	66958386	66958636	[10.58599]	135	-	66958376	PC	ENST00000393958.6:ENST00000393960.5:ENST00000524491.5
H929	25470	chr12	121352597	3.46	7	PROMOTER	10.3866	chr12:121352472-121352722	chr12	121352472	121352722	[9.21, 10.38662]	135	-	121352462	ANAPC5	ENST00000261819.7	209	-	121352388	ANAPC5	ENST00000541887.5
H929	4755	chr2	96537210	2	4	PROMOTER	9.32881	chr2:96537085-96537335	chr2	96537085	96537335	[9.32881, 4.13]	135	+	96537345	ARID5A	ENST00000454558.2	461	+	96536749	ARID5A	ENST00000357485.7
H929	14888	chr6	75284813	0	0	PROMOTER	7.39054	chr6:75284688-75284938	chr6	75284688	75284938	[7.39054]	135	-	75284948	TMEM30A	ENST00000475111.6	155	-	75284968	TMEM30A	ENST00000230461.10	201	+	75285014	RP1-234P15.4	ENST00000438676.1	220	+	75285033	RP1-234P15.4	ENST00000607221.1	233	+	75285046	RP1-234P15.4	ENST00000607799.1
H929	32484	chr22	46058295	1.41	3	PROMOTER	6.51129	chr22:46058170-46058420	chr22	46058170	46058420	[3.69, 6.51129]	135	-	46058160	RP6-109B7.2	ENST00000439423.1
H929	25475	chr12	121794398	0	1	PROMOTER	43.4284	chr12:121794273-121794523	chr12	121794273	121794523	[12.75, 43.42839]	136	-	121794262	RHOF	ENST00000267205.6:ENST00000537171.5	1038	-	121793360	RHOF	ENST00000537265.5
H929	24413	chr12	6851405	1	2	PROMOTER	10.6294	chr12:6851280-6851530	chr12	6851280	6851530	[10.62939, 7.66]	136	-	6851269	CDCA3	ENST00000422785.7	147	-	6851258	CDCA3	ENST00000535406.5	153	-	6851252	CDCA3	ENST00000229265.10	156	-	6851249	CDCA3	ENST00000540683.1	661	-	6852066	CDCA3	ENST00000538862.6	723	+	6852128	USP5	ENST00000229268.12	743	+	6852148	USP5	ENST00000389231.9
H929	14601	chr6	42563926	0	0	PROMOTER	6.75547	chr6:42563801-42564051	chr6	42563801	42564051	[6.75547]	136	+	42564062	UBR2	ENST00000372903.6:ENST00000372899.5:ENST00000372901.1
H929	14688	chr6	46129455	4	8	PROMOTER	5.42058	chr6:46129330-46129580	chr6	46129330	46129580	[5.42058, 1.21]	136	-	46129591	RP1-8B1.4	ENST00000444038.2	251	-	46129706	RP1-8B1.4	ENST00000437249.2	538	+	46129993	ENPP4	ENST00000321037.4
H929	13079	chr5	143435375	76.63	165	PROMOTER	9.20865	chr5:143435250-143435500	chr5	143435250	143435500	[2.08, 9.20865, 3.36]	137	-	143435512	NR3C1	ENST00000343796.6	673	-	143434702	NR3C1	ENST00000504572.5
H929	1134	chr1	120850847	6.48	13	PROMOTER	23.7619	chr1:120850722-120850972	chr1	120850722	120850972	[9.85, 23.76191]	138	-	120850985	RNVU1-19	ENST00000613023.1
H929	17287	chr7	144086416	0	0	PROMOTER	6.75547	chr7:144086291-144086541	chr7	144086291	144086541	[6.75547]	138	+	144086278	OR2A12	ENST00000641592.1
H929	7651	chr3	120095033	0	0	PROMOTER	5.34262	chr3:120094908-120095158	chr3	120094908	120095158	[5.34262]	138	+	120094895	RP11-18H7.1	ENST00000484076.1	237	+	120095270	RP11-18H7.1	ENST00000469070.1	616	-	120094417	GSK3B	ENST00000264235.12	1367	-	120093666	GSK3B	ENST00000316626.5
H929	19985	chr9	26746814	9.49	19	PROMOTER	6.08413	chr9:26746689-26746939	chr9	26746689	26746939	[6.08413, 1.63]	139	+	26746953	RP11-18A15.1	ENST00000523363.1
H929	11208	chr5	40240313	7.48	15	PROMOTER	9.22241	chr5:40240188-40240438	chr5	40240188	40240438	[9.22241, 2.59]	140	+	40240173	CTD-2651L24.1	ENST00000637924.1
H929	11259	chr5	43041897	0	0	PROMOTER	7.49674	chr5:43041772-43042022	chr5	43041772	43042022	[7.49674]	140	+	43041757	AC025171.1	ENST00000505541.1	322	+	43041575	AC025171.1	ENST00000451894.6	1273	-	43043170	ANXA2R	ENST00000314890.3	1552	-	43040345	ANXA2R	ENST00000616064.1
H929	8836	chr4	24980288	1	2	PROMOTER	7.14927	chr4:24980163-24980413	chr4	24980163	24980413	[7.14927, 1.22]	140	-	24980148	CCDC149	ENST00000389609.8
H929	1206	chr1	145465639	104.18	222	PROMOTER	38.0167	chr1:145465514-145465764	chr1	145465514	145465764	[9.02, 38.01668, 19.72]	141	-	145465780	RF00003	ENST00000605806.1
H929	9294	chr4	77862661	4.47	9	PROMOTER	21.7379	chr4:77862536-77862786	chr4	77862536	77862786	[21.73786, 10.96]	141	+	77862520	MRPL1	ENST00000315567.12
H929	24499	chr12	14803713	2	4	PROMOTER	19.577	chr12:14803588-14803838	chr12	14803588	14803838	[5.48, 19.57695]	141	+	14803572	C12orf60	ENST00000330828.2	173	-	14803540	WBP11	ENST00000261167.6
H929	144	chr1	12746074	4	8	PROMOTER	13.0252	chr1:12745949-12746199	chr1	12745949	12746199	[13.02516, 3.19]	141	+	12746215	C1orf158	ENST00000614859.4	351	+	12746425	C1orf158	ENST00000376210.3
H929	1558	chr1	155308607	0	0	PROMOTER	12.8116	chr1:155308482-155308732	chr1	155308482	155308732	[12.81158]	141	+	155308748	FDPS	ENST00000611010.4	187	+	155308794	FDPS	ENST00000447866.5	245	+	155308852	FDPS	ENST00000368356.8	282	+	155308889	FDPS	ENST00000467076.5	309	+	155308916	FDPS	ENST00000356657.10	363	+	155308970	FDPS	ENST00000612683.1
H929	2302	chr1	171485410	6.48	13	PROMOTER	9.30081	chr1:171485285-171485535	chr1	171485285	171485535	[9.30081, 8.08]	141	+	171485551	PRRC2C	ENST00000367742.7:ENST00000392078.7	146	+	171485556	PRRC2C	ENST00000338920.8
H929	1050	chr1	113929515	0	0	PROMOTER	6.84445	chr1:113929390-113929640	chr1	113929390	113929640	[6.84445]	141	+	113929374	HIPK1	ENST00000369559.8:ENST00000626993.2	195	+	113929710	HIPK1	ENST00000369558.5	197	-	113929318	RP5-1073O3.7	ENST00000441071.5	240	+	113929755	HIPK1	ENST00000369561.8	257	-	113929258	RP5-1073O3.7	ENST00000450706.1	323	+	113929192	HIPK1	ENST00000426820.6	344	+	113929859	HIPK1	ENST00000369555.6
H929	32138	chr21	42974652	5	10	PROMOTER	999	chr21:42974527-42974777	chr21	42974527	42974777	[999.0, 108.13165]	142	+	42974510	PKNOX1	ENST00000291547.9:ENST00000432907.6
H929	25320	chr12	110048707	0	0	PROMOTER	13.1127	chr12:110048582-110048832	chr12	110048582	110048832	[13.11266]	142	-	110048565	C12orf76	ENST00000551185.2	152	-	110048555	C12orf76	ENST00000546651.3	155	-	110048552	C12orf76	ENST00000547573.1	185	-	110048522	C12orf76	ENST00000546627.1	578	-	110049285	C12orf76	ENST00000549724.1
H929	3636	chr1	244452276	0	0	PROMOTER	6.47447	chr1:244452151-244452401	chr1	244452151	244452401	[6.47447]	142	-	244452134	ADSS	ENST00000366535.3
H929	30458	chr19	1041103	1.41	3	PROMOTER	60.5118	chr19:1040978-1041228	chr19	1040978	1041228	[60.5118, 36.59]	143	+	1041246	ABCA7	ENST00000433129.5	1000	+	1040103	ABCA7	ENST00000263094.10	1522	+	1042625	ABCA7	ENST00000435683.6
H929	8571	chr4	337677	1.41	3	PROMOTER	18.5466	chr4:337552-337802	chr4	337552	337802	[5.15, 18.54663]	143	+	337820	ZNF141	ENST00000512994.5	157	+	337834	ZNF141	ENST00000505939.5	158	+	337835	ZNF141	ENST00000240499.7
H929	13831	chr5	181222489	0	0	PROMOTER	6.85038	chr5:181222364-181222614	chr5	181222364	181222614	[6.85038]	144	-	181222633	MIR4638	ENST00000581158.1	801	+	181223290	TRIM41	ENST00000351937.9:ENST00000315073.9
H929	6109	chr2	219387652	0	0	PROMOTER	5.06863	chr2:219387527-219387777	chr2	219387527	219387777	[5.06863]	144	-	219387796	DNPEP	ENST00000520694.6	363	-	219388015	DNPEP	ENST00000273075.8	844	+	219388496	AC053503.4	ENST00000420563.1	1224	-	219388876	DNPEP	ENST00000373972.5
H929	4233	chr2	39129072	4	8	PROMOTER	106.62	chr2:39128947-39129197	chr2	39128947	39129197	[47.62, 106.6204]	145	-	39128927	RF00019	ENST00000365439.1
H929	32443	chr22	41747167	0	0	PROMOTER	21.8463	chr22:41747042-41747292	chr22	41747042	41747292	[5.93, 21.84632]	145	+	41747312	RF00019	ENST00000384086.1
H929	30833	chr19	36797380	0	0	PROMOTER	6.09389	chr19:36797255-36797505	chr19	36797255	36797505	[6.09389]	145	+	36797525	ZNF790-AS1	ENST00000589556.1	183	+	36797563	ZNF790-AS1	ENST00000588906.5
H929	28207	chr16	70523933	87.5	175	PROMOTER	5.79067	chr16:70523808-70524058	chr16	70523808	70524058	[5.25992, 5.79067]	145	+	70523788	SF3B3	ENST00000302516.9	368	-	70523565	COG4	ENST00000323786.9	379	-	70523554	COG4	ENST00000393612.8	383	-	70523550	COG4	ENST00000564653.5
H929	30768	chr19	20776158	5	10	PROMOTER	16.5875	chr19:20776033-20776283	chr19	20776033	20776283	[16.58752, 4.98]	146	+	20776304	ZNF66	ENST00000360204.5	152	+	20776310	ZNF66	ENST00000594534.5	267	+	20776425	ZNF66	ENST00000344519.8
H929	11335	chr5	54310728	3.46	7	PROMOTER	11.5851	chr5:54310603-54310853	chr5	54310603	54310853	[11.58514, 6.84]	146	-	54310582	ARL15	ENST00000502271.5	152	-	54310576	ARL15	ENST00000507646.2	155	-	54310573	ARL15	ENST00000504924.5:ENST00000620747.4
H929	1323	chr1	149812213	2	4	PROMOTER	10.2423	chr1:149812088-149812338	chr1	149812088	149812338	[10.24228, 5.8]	146	-	149812359	HIST2H2BF	ENST00000369167.2	160	-	149812373	HIST2H2BF	ENST00000545683.1	1468	-	149813681	HIST2H3D	ENST00000331491.1
H929	28976	chr17	48831181	7.48	15	PROMOTER	8.93	chr17:48831056-48831306	chr17	48831056	48831306	[8.44869, 8.93]	146	+	48831035	CALCOCO2	ENST00000416445.6:ENST00000508679.5	147	+	48831034	CALCOCO2	ENST00000448105.6	155	+	48831026	CALCOCO2	ENST00000509507.5	193	+	48830988	CALCOCO2	ENST00000258947.7
H929	27664	chr16	4351518	0	0	PROMOTER	7.42584	chr16:4351393-4351643	chr16	4351393	4351643	[7.42584]	146	-	4351372	PAM16	ENST00000318059.7	253	-	4351265	PAM16	ENST00000577031.5
H929	22959	chr11	73271669	4.47	9	PROMOTER	20.7675	chr11:73271544-73271794	chr11	73271544	73271794	[18.07, 20.76752]	147	+	73271522	P2RY6	ENST00000540124.5	533	+	73272202	P2RY6	ENST00000393590.2	1775	+	73269894	P2RY6	ENST00000393591.5
H929	29178	chr17	64506735	8	16	PROMOTER	15.3514	chr17:64506610-64506860	chr17	64506610	64506860	[9.02, 15.35138]	147	+	64506588	CEP95	ENST00000556440.6	214	-	64506521	DDX5	ENST00000225792.9	276	+	64507011	CEP95	ENST00000581056.5	305	+	64507040	CEP95	ENST00000553412.5	443	-	64506292	DDX5	ENST00000630471.2	448	-	64506287	DDX5	ENST00000450599.6	779	-	64505956	DDX5	ENST00000578804.5
H929	33192	chrX	147189639	3.46	7	PROMOTER	6.08413	chrX:147189514-147189764	chrX	147189514	147189764	[1.12, 6.08413]	148	-	147189787	MIR513C	ENST00000401352.1
H929	4796	chr2	99155146	0	0	PROMOTER	5.06863	chr2:99155021-99155271	chr2	99155021	99155271	[5.06863]	148	+	99154998	RP11-38C17.1	ENST00000410042.1	191	+	99154955	LIPT1	ENST00000393471.2:ENST00000393473.6	229	-	99154917	TSGA10	ENST00000393483.7
H929	10701	chr5	10401708	2	4	PROMOTER	34.739	chr5:10401583-10401833	chr5	10401583	10401833	[34.73902, 9.92]	149	+	10401857	MARCH6	ENST00000510792.1
H929	30779	chr19	23250540	4	8	PROMOTER	69.8896	chr19:23250415-23250665	chr19	23250415	23250665	[69.88962, 36.2]	150	-	23250390	ZNF724	ENST00000597037.1	180	-	23250360	ZNF724	ENST00000418100.5
H929	339	chr1	27490308	1	2	PROMOTER	50.2416	chr1:27490183-27490433	chr1	27490183	27490433	[34.22, 50.24158]	150	-	27490158	WASF2	ENST00000618852.4	257	-	27490051	WASF2	ENST00000536657.1
H929	28668	chr17	19306411	0	0	PROMOTER	9.47937	chr17:19306286-19306536	chr17	19306286	19306536	[9.47937]	150	-	19306261	AC107982.5	ENST00000451099.1
H929	32419	chr22	40177775	12.49	25	PROMOTER	6.08413	chr22:40177650-40177900	chr22	40177650	40177900	[6.08413, 3.69]	150	+	40177925	TNRC6B	ENST00000454349.6	167	+	40177942	TNRC6B	ENST00000335727.13
H929	29077	chr17	58417732	4	8	PROMOTER	5.68548	chr17:58417607-58417857	chr17	58417607	58417857	[1.79, 5.68548]	150	-	58417582	RNF43	ENST00000577716.5	199	-	58417533	RNF43	ENST00000584437.5	380	-	58417352	RNF43	ENST00000407977.6	647	-	58417085	RNF43	ENST00000581868.1
H929	26968	chr15	44195382	1.41	3	PROMOTER	96.0696	chr15:44195257-44195507	chr15	44195257	44195507	[96.06963, 80.8]	151	-	44195231	FRMD5	ENST00000417257.5	172	-	44195210	FRMD5	ENST00000402883.5	936	-	44194446	FRMD5	ENST00000484674.5
H929	28440	chr16	89171616	0	0	PROMOTER	11.2309	chr16:89171491-89171741	chr16	89171491	89171741	[11.2309]	151	+	89171767	CDH15	ENST00000289746.2
H929	20587	chr9	109120096	0	0	PROMOTER	9.99157	chr9:109119971-109120221	chr9	109119971	109120221	[9.99157]	151	-	109119945	TMEM245	ENST00000374586.7
H929	14455	chr6	32177635	1.41	3	PROMOTER	8.90104	chr6:32177510-32177760	chr6	32177510	32177760	[8.90104, 1.7]	151	-	32177786	AGPAT1	ENST00000395497.5	310	-	32177325	AGPAT1	ENST00000375104.6	461	-	32178096	AGPAT1	ENST00000336984.6	555	-	32177080	AGPAT1	ENST00000395499.5	719	+	32178354	RNF5	ENST00000375094.3	1513	-	32176122	AGPAT1	ENST00000375107.7
H929	11257	chr5	43040497	0	0	PROMOTER	9.82817	chr5:43040372-43040622	chr5	43040372	43040622	[9.82817]	152	-	43040345	ANXA2R	ENST00000616064.1	1078	+	43041575	AC025171.1	ENST00000451894.6	1260	+	43041757	AC025171.1	ENST00000505541.1
H929	11273	chr5	43484224	0	0	PROMOTER	8.25808	chr5:43484099-43484349	chr5	43484099	43484349	[8.25808]	152	+	43484072	RP11-159F24.3	ENST00000505645.1	333	-	43483891	TMEM267	ENST00000512085.5	339	-	43483885	TMEM267	ENST00000397080.7	359	-	43483865	TMEM267	ENST00000510130.1	388	-	43483836	TMEM267	ENST00000500337.6
H929	11621	chr5	68434633	0	0	PROMOTER	7.72894	chr5:68434508-68434758	chr5	68434508	68434758	[7.72894]	152	-	68434481	CTC-537E7.3	ENST00000507733.1
H929	8573	chr4	474295	3.46	7	PROMOTER	42.5367	chr4:474170-474420	chr4	474170	474420	[16.47, 42.53675]	153	-	474142	ZNF721	ENST00000506646.5
H929	11631	chr5	68963093	0	0	PROMOTER	7.14927	chr5:68962968-68963218	chr5	68962968	68963218	[7.14927]	153	+	68963246	RP11-141O11.1	ENST00000513197.1	935	-	68962158	CTC-340D7.1	ENST00000503268.1
H929	14245	chr6	26204705	6.48	13	PROMOTER	6.80918	chr6:26204580-26204830	chr6	26204580	26204830	[6.80918, 5.63]	153	+	26204552	HIST1H4E	ENST00000615164.2
H929	9060	chr4	48780453	5.48	11	PROMOTER	43.9538	chr4:48780328-48780578	chr4	48780328	48780578	[43.95382, 28.56]	154	-	48780299	FRYL	ENST00000358350.8	205	-	48780248	FRYL	ENST00000507711.5
H929	10791	chr5	15501592	91.04	197	PROMOTER	21.9151	chr5:15501467-15501717	chr5	15501467	15501717	[3.93454, 21.91506, 7.1]	154	+	15501438	FBXL7	ENST00000510662.1	1396	+	15500196	FBXL7	ENST00000504595.1
H929	11761	chr5	76403095	0	0	PROMOTER	9.50145	chr5:76402970-76403220	chr5	76402970	76403220	[9.50145]	154	+	76403249	IQGAP2	ENST00000274364.10
H929	4042	chr2	26245080	98.8	213	PROMOTER	8.18	chr2:26244955-26245205	chr2	26244955	26245205	[4.52074, 3.96578, 8.18]	154	+	26244926	HADHB	ENST00000405867.7	185	+	26244895	HADHB	ENST00000317799.9	332	+	26244748	HADHB	ENST00000537713.5	354	-	26244726	HADHA	ENST00000380649.7	464	-	26244616	HADHA	ENST00000645274.1	476	-	26244604	HADHA	ENST00000492433.2
H929	7654	chr3	120244449	0	0	PROMOTER	5.00266	chr3:120244324-120244574	chr3	120244324	120244574	[5.00266]	154	-	120244295	GPR156	ENST00000315843.7	333	-	120244116	GPR156	ENST00000461057.1
H929	32968	chrX	120630305	0	0	PROMOTER	7.37055	chrX:120630180-120630430	chrX	120630180	120630430	[7.37055]	155	-	120630150	C1GALT1C1	ENST00000304661.5	310	-	120629995	C1GALT1C1	ENST00000371313.2
H929	343	chr1	27672374	4.47	9	PROMOTER	19.4429	chr1:27672249-27672499	chr1	27672249	27672499	[7.79, 19.44291]	156	-	27672218	IFI6	ENST00000361157.10	176	-	27672198	IFI6	ENST00000362020.4	196	-	27672178	IFI6	ENST00000339145.8
H929	16505	chr7	54759818	0	0	PROMOTER	8.96397	chr7:54759693-54759943	chr7	54759693	54759943	[8.96397]	156	-	54759974	SEC61G	ENST00000415949.5	393	+	54759425	RP11-745C15.2	ENST00000439413.2	572	-	54759246	SEC61G	ENST00000395535.7:ENST00000352861.8	636	-	54759182	SEC61G	ENST00000450622.1
H929	1786	chr1	160343556	0	0	PROMOTER	8.38353	chr1:160343431-160343681	chr1	160343431	160343681	[8.38353]	156	-	160343400	COPA	ENST00000241704.7	284	+	160343272	NCSTN	ENST00000294785.9	308	-	160343248	COPA	ENST00000368069.7
H929	4535	chr2	68735039	119.5	239	PROMOTER	9.39193	chr2:68734914-68735164	chr2	68734914	68735164	[9.39193, 2.45021]	157	+	68734882	ARHGAP25	ENST00000467265.5	204	+	68734835	ARHGAP25	ENST00000409202.7
H929	22892	chr11	67650817	2	4	PROMOTER	12.6188	chr11:67650692-67650942	chr11	67650692	67650942	[12.61878, 1.45]	158	-	67650659	ACY3	ENST00000255082.7
H929	22313	chr11	5689847	1.41	3	PROMOTER	6.75547	chr11:5689722-5689972	chr11	5689722	5689972	[1.76, 6.75547]	158	+	5689689	TRIM22	ENST00000379965.7
H929	19235	chr8	106617968	0	0	PROMOTER	5.58536	chr8:106617843-106618093	chr8	106617843	106618093	[5.58536]	158	+	106618126	OXR1	ENST00000497705.5
H929	2946	chr1	205211725	2.45	5	PROMOTER	11.6126	chr1:205211600-205211850	chr1	205211600	205211850	[11.6126, 9.88]	159	-	205211566	DSTYK	ENST00000367161.7:ENST00000367162.7
H929	19600	chr8	125430162	0	0	PROMOTER	6.03541	chr8:125430037-125430287	chr8	125430037	125430287	[6.03541]	159	+	125430321	TRIB1	ENST00000311922.3
H929	504	chr1	39817619	0	0	PROMOTER	5.07554	chr1:39817494-39817744	chr1	39817494	39817744	[5.07554]	159	-	39817460	RP1-118J21.28	ENST00000641026.1
H929	30508	chr19	4472127	1	2	PROMOTER	74.037	chr19:4472002-4472252	chr19	4472002	4472252	[74.03695, 34.49]	160	+	4472287	CTB-50L17.10	ENST00000616600.4	179	+	4472306	CTB-50L17.10	ENST00000621835.4	634	-	4471493	CTB-50L17.16	ENST00000589066.1
H929	21165	chr10	18659245	5	10	PROMOTER	14.5804	chr10:18659120-18659370	chr10	18659120	18659370	[14.58038, 6.86]	160	+	18659405	ARL5B	ENST00000377275.3
H929	27291	chr15	72615970	5.48	11	PROMOTER	12.5755	chr15:72615845-72616095	chr15	72615845	72616095	[12.57552, 4.98]	160	+	72615810	RP11-1006G14.1	ENST00000563464.1
H929	13689	chr5	172697560	0	0	PROMOTER	5.85428	chr5:172697435-172697685	chr5	172697435	172697685	[5.85428]	160	-	172697720	CTB-79E8.2	ENST00000519976.1
H929	1847	chr1	161166249	1.41	3	PROMOTER	24.98	chr1:161166124-161166374	chr1	161166124	161166374	[19.41585, 24.98]	161	+	161166410	PPOX	ENST00000352210.9	166	+	161166415	PPOX	ENST00000367999.8	221	+	161166470	PPOX	ENST00000544598.5	249	+	161166498	PPOX	ENST00000535223.5	591	+	161166840	PPOX	ENST00000462866.5
H929	20637	chr9	111631190	0	0	PROMOTER	18.9024	chr9:111631065-111631315	chr9	111631065	111631315	[18.90241]	162	+	111631352	DNAJC25	ENST00000313525.3	196	+	111631386	DNAJC25-GNG10	ENST00000374294.3
H929	2260	chr1	170531838	4.47	9	PROMOTER	7.33	chr1:170531713-170531963	chr1	170531713	170531963	[7.12313, 7.33]	162	-	170532000	RP11-576I22.2	ENST00000421020.1	291	+	170532129	GORAB	ENST00000367763.7	293	+	170532131	GORAB	ENST00000367762.1
H929	1362	chr1	150566698	0	0	PROMOTER	7.0073	chr1:150566573-150566823	chr1	150566573	150566823	[7.0073]	162	-	150566860	RN7SL473P	ENST00000580341.2
H929	33225	chrX	151168060	0	0	PROMOTER	5.06748	chrX:151167935-151168185	chrX	151167935	151168185	[5.06748]	162	+	151168222	MIR4330	ENST00000579077.1
H929	32384	chr22	38506500	96.22	208	PROMOTER	232.77	chr22:38506375-38506625	chr22	38506375	38506625	[16.17, 155.92482, 232.77]	163	-	38506337	DDX17	ENST00000396821.7	263	-	38506237	DDX17	ENST00000640332.1:ENST00000640668.1
H929	14386	chr6	28943714	1.41	3	PROMOTER	22.8231	chr6:28943589-28943839	chr6	28943589	28943839	[22.82306, 10.58]	163	+	28943877	LINC01556	ENST00000377186.3
H929	2945	chr1	205211403	0	0	PROMOTER	15.3514	chr1:205211278-205211528	chr1	205211278	205211528	[15.35138]	163	-	205211566	DSTYK	ENST00000367161.7:ENST00000367162.7
H929	11678	chr5	73213791	0	1	PROMOTER	9.20826	chr5:73213666-73213916	chr5	73213666	73213916	[4.63, 9.20826]	163	+	73213954	RP11-60A8.1	ENST00000513379.1
H929	29942	chr18	52340009	0	0	PROMOTER	5.67647	chr18:52339884-52340134	chr18	52339884	52340134	[5.67647]	163	+	52340172	DCC	ENST00000442544.6	984	-	52339025	RP11-25O3.1	ENST00000582700.1
H929	14252	chr6	26234769	108.68	233	PROMOTER	23.6164	chr6:26234644-26234894	chr6	26234644	26234894	[1.35, 14.32, 23.61635]	164	-	26234933	HIST1H1D	ENST00000244534.6
H929	30737	chr19	17337380	0	1	PROMOTER	23.3098	chr19:17337255-17337505	chr19	17337255	17337505	[23.30978, 4.85]	164	+	17337544	GTPBP3	ENST00000324894.12	175	+	17337555	GTPBP3	ENST00000358792.11:ENST00000600625.5
H929	22845	chr11	65498569	0	0	PROMOTER	9.82817	chr11:65498444-65498694	chr11	65498444	65498694	[9.82817]	164	-	65498405	AP000769.7	ENST00000602344.1	881	+	65497688	MALAT1	ENST00000619449.2
H929	24811	chr12	57742321	2.45	5	PROMOTER	6.6768	chr12:57742196-57742446	chr12	57742196	57742446	[1.94, 6.6768]	164	-	57742157	AGAP2	ENST00000257897.7
H929	23857	chr11	119067527	0	0	PROMOTER	9.32	chr11:119067402-119067652	chr11	119067402	119067652	[9.32]	165	+	119067692	VPS11	ENST00000621676.4	171	-	119067698	RP11-110I1.13	ENST00000607709.1	294	+	119067821	VPS11	ENST00000614944.4	1850	-	119065677	RP11-110I1.14	ENST00000607857.1
H929	4972	chr2	113889585	107.5	215	PROMOTER	7.60887	chr2:113889460-113889710	chr2	113889460	113889710	[3.24705, 7.60887]	165	-	113889750	RP11-141B14.1	ENST00000602760.1	375	+	113889960	ACTR3	ENST00000263238.6	508	+	113890093	ACTR3	ENST00000415792.5	1013	+	113890598	ACTR3	ENST00000535589.3
H929	7200	chr3	69739270	2	4	PROMOTER	7.49674	chr3:69739145-69739395	chr3	69739145	69739395	[7.49674, 2.65]	165	+	69739435	MITF	ENST00000352241.8	212	+	69739482	MITF	ENST00000448226.7:ENST00000642352.1
H929	21123	chr10	15043731	0	0	PROMOTER	7.38998	chr10:15043606-15043856	chr10	15043606	15043856	[7.38998]	165	+	15043896	OLAH	ENST00000378228.7	232	+	15043963	OLAH	ENST00000378217.3
H929	5465	chr2	170928361	98	196	PROMOTER	7.33568	chr2:170928236-170928486	chr2	170928236	170928486	[4.09936, 7.33568]	165	+	170928526	GORASP2	ENST00000234160.4
H929	28157	chr16	66517037	0	0	PROMOTER	6.59869	chr16:66516912-66517162	chr16	66516912	66517162	[6.59869]	165	-	66517202	RP11-403P17.5	ENST00000561728.1
H929	30774	chr19	22634158	6	12	PROMOTER	72.2949	chr19:22634033-22634283	chr19	22634033	22634283	[72.29489, 22.78]	166	+	22634324	ZNF492	ENST00000456783.2
H929	20537	chr9	104991615	0	0	PROMOTER	5.06753	chr9:104991490-104991740	chr9	104991490	104991740	[5.06753]	166	-	104991781	RP11-217B7.3	ENST00000457720.1
H929	28903	chr17	43361194	2	4	PROMOTER	47.4936	chr17:43361069-43361319	chr17	43361069	43361319	[47.49363, 32.69]	167	-	43361361	CTD-3014M21.1	ENST00000624705.1
H929	32537	chrM	4096	0	0	PROMOTER	15.3099	chrM:3971-4221	chrM	3971	4221	[15.30989]	167	+	4263	MT-TI	ENST00000387365.1	304	-	4400	MT-TQ	ENST00000387372.1	306	+	4402	MT-TM	ENST00000387377.1	374	+	4470	MT-ND2	ENST00000361453.3	789	+	3307	MT-ND1	ENST00000361390.2	866	+	3230	MT-TL1	ENST00000386347.1	1416	+	5512	MT-TW	ENST00000387382.1	1559	-
H929	6919	chr3	45689073	0	0	PROMOTER	11.9365	chr3:45688948-45689198	chr3	45688948	45689198	[11.93649]	168	+	45689241	SACM1L	ENST00000418611.5	189	+	45689262	SACM1L	ENST00000389061.9	191	-	45688882	LIMD1-AS1	ENST00000427644.1
H929	363	chr1	28246976	0	0	PROMOTER	10.6327	chr1:28246851-28247101	chr1	28246851	28247101	[10.63268]	168	+	28247144	RP5-1092A3.5	ENST00000605846.1
H929	22649	chr11	40294282	0	0	PROMOTER	6.53221	chr11:40294157-40294407	chr11	40294157	40294407	[6.53221]	168	-	40294114	LRRC4C	ENST00000278198.2	1152	-	40293130	LRRC4C	ENST00000527150.5
H929	307	chr1	25998326	36.85	81	PROMOTER	19.4532	chr1:25998201-25998451	chr1	25998201	25998451	[19.45317, 16.84, 7.88]	169	-	25998157	PAFAH2	ENST00000374282.7	282	-	25998044	PAFAH2	ENST00000374284.5
H929	4118	chr2	32357197	0	0	PROMOTER	7.10003	chr2:32357072-32357322	chr2	32357072	32357322	[7.10003]	169	+	32357028	BIRC6	ENST00000421745.6
H929	12910	chr5	134367243	0	0	PROMOTER	6.469	chr5:134367118-134367368	chr5	134367118	134367368	[6.469]	169	-	134367074	CDKL3	ENST00000265334.8	173	-	134367070	CDKL3	ENST00000521118.5	720	-	134366523	CDKL3	ENST00000523832.1
H929	16610	chr7	74254628	0	0	PROMOTER	5.50175	chr7:74254503-74254753	chr7	74254503	74254753	[5.50175]	170	-	74254458	RFC2	ENST00000621097.4	184	-	74254444	RFC2	ENST00000055077.7	239	-	74254389	RFC2	ENST00000352131.7
H929	14248	chr6	26216521	2	4	PROMOTER	17.8838	chr6:26216396-26216646	chr6	26216396	26216646	[17.88382, 7.88]	171	-	26216692	HIST1H2BG	ENST00000541790.3	454	+	26216975	HIST1H2AE	ENST00000303910.4
H929	6248	chr2	230416585	1.41	3	PROMOTER	6.32213	chr2:230416460-230416710	chr2	230416460	230416710	[6.32213, 1.92]	171	+	230416756	SP100	ENST00000409897.5	319	+	230416266	SP100	ENST00000409112.5:ENST00000340126.8	338	+	230416247	SP100	ENST00000409341.5	345	+	230416240	SP100	ENST00000409824.5	429	+	230416156	SP100	ENST00000427101.6	643	+	230415942	SP100	ENST00000264052.9
H929	28227	chr16	72172426	0	0	PROMOTER	6.08413	chr16:72172301-72172551	chr16	72172301	72172551	[6.08413]	171	-	72172255	PMFBP1	ENST00000237353.14	274	-	72172152	PMFBP1	ENST00000537465.5	1155	-	72171271	PMFBP1	ENST00000355636.10
H929	14541	chr6	36874852	9.49	19	PROMOTER	22.8478	chr6:36874727-36874977	chr6	36874727	36874977	[22.84779, 6.15]	172	-	36875024	PPIL1	ENST00000373699.5
H929	11954	chr5	87294301	6.48	13	PROMOTER	7.14927	chr5:87294176-87294426	chr5	87294176	87294426	[7.14927, 1.56]	172	-	87294473	RN7SL629P	ENST00000489622.3
H929	11851	chr5	80407841	0	0	PROMOTER	6.31478	chr5:80407716-80407966	chr5	80407716	80407966	[6.31478]	172	+	80408013	ZFYVE16	ENST00000338008.9	183	+	80408024	ZFYVE16	ENST00000510158.5	185	+	80408026	ZFYVE16	ENST00000505560.4
H929	11369	chr5	55102476	5.48	11	PROMOTER	6.08413	chr5:55102351-55102601	chr5	55102351	55102601	[6.08413, 1.63]	172	+	55102648	GZMA	ENST00000274306.6
H929	30506	chr19	4400720	0	0	PROMOTER	11.6126	chr19:4400595-4400845	chr19	4400595	4400845	[11.6126]	173	-	4400547	SH3GL1	ENST00000269886.7	195	-	4400525	SH3GL1	ENST00000417295.6	302	-	4400418	SH3GL1	ENST00000598564.5	1942	+	4402662	CHAF1A	ENST00000301280.9
H929	15541	chr6	132814614	1	2	PROMOTER	9.22241	chr6:132814489-132814739	chr6	132814489	132814739	[5.2, 9.22241]	173	+	132814441	RPS12	ENST00000230050.3	693	+	132815307	SNORD101	ENST00000384027.1
H929	29336	chr17	76560936	0	0	PROMOTER	5.65099	chr17:76560811-76561061	chr17	76560811	76561061	[5.65099]	173	+	76561109	SNORD1B	ENST00000363091.1	698	+	76561634	SNORD1A	ENST00000364968.1
H929	20797	chr9	124415613	5	10	PROMOTER	12.2484	chr9:124415488-124415738	chr9	124415488	124415738	[12.24842, 5.08]	174	-	124415439	PSMB7	ENST00000259457.7
H929	22109	chr10	118241469	0	0	PROMOTER	10.1987	chr10:118241344-118241594	chr10	118241344	118241594	[10.19874]	174	+	118241643	RP11-245J24.1	ENST00000431695.5	183	+	118241652	RP11-245J24.1	ENST00000436430.1
H929	4739	chr2	88857508	2	4	PROMOTER	13.6165	chr2:88857383-88857633	chr2	88857383	88857633	[6.08, 13.61645]	175	-	88857683	IGKC	ENST00000390237.2
H929	15913	chr6	158853413	87.02	186	PROMOTER	10.5503	chr6:158853288-158853538	chr6	158853288	158853538	[4.66153, 1.56, 10.55033, 4.78]	175	+	158853588	XXyac-YR21IF11.3	ENST00000642329.1
H929	10373	chr4	184537378	0	0	PROMOTER	6.91626	chr4:184537253-184537503	chr4	184537253	184537503	[6.91626]	176	-	184537554	RP11-326I11.4	ENST00000605270.5
H929	13009	chr5	140401544	3	6	PROMOTER	133.63	chr5:140401419-140401669	chr5	140401419	140401669	[87.94913, 133.63]	177	-	140401367	CTC-329D1.2	ENST00000507521.1	270	+	140401814	ANKHD1	ENST00000297183.10:ENST00000360839.6:ENST00000616482.4	310	+	140401854	ANKHD1	ENST00000394723.7	364	+	140401908	ANKHD1-EIF4EBP3	ENST00000532219.5	377	+	140401921	ANKHD1	ENST00000394722.7
H929	18069	chr8	49512003	2.45	5	PROMOTER	35.3837	chr8:49511878-49512128	chr8	49511878	49512128	[35.38374, 10.23]	177	-	49512180	RP11-738G5.1	ENST00000518854.1
H929	25937	chr14	22589446	0	0	PROMOTER	6.5057	chr14:22589321-22589571	chr14	22589321	22589571	[6.5057]	177	-	22589269	DAD1	ENST00000250498.8	224	-	22589222	DAD1	ENST00000543337.1	289	-	22589157	DAD1	ENST00000538631.1
H929	7770	chr3	128124002	28.88	69	PROMOTER	16.8299	chr3:128123877-128124127	chr3	128123877	128124127	[5.2, 16.82993, 6.84]	178	-	128123824	RUVBL1	ENST00000322623.9
H929	27385	chr15	80999803	0	0	PROMOTER	10.4012	chr15:80999678-80999928	chr15	80999678	80999928	[10.40125]	178	-	80999981	RP11-775C24.5	ENST00000620635.1	1141	+	81000944	TLNRD1	ENST00000267984.3
H929	12892	chr5	133051784	1	2	PROMOTER	6.80918	chr5:133051659-133051909	chr5	133051659	133051909	[6.80918, 3.87]	178	+	133051962	HSPA4	ENST00000304858.6	344	+	133052128	HSPA4	ENST00000617074.4	457	+	133052241	HSPA4	ENST00000615899.1	985	+	133052769	RP11-485M7.2	ENST00000623366.1
H929	24061	chr11	125874707	2.45	5	PROMOTER	28.113	chr11:125874582-125874832	chr11	125874582	125874832	[28.11301, 5.38]	179	-	125874528	RP11-680F20.10	ENST00000569238.1	309	-	125874398	RP11-680F20.10	ENST00000564354.1
H929	9194	chr4	70688299	6.48	13	PROMOTER	29.9297	chr4:70688174-70688424	chr4	70688174	70688424	[29.92972, 23.99]	180	+	70688479	UTP3	ENST00000254803.3
H929	11430	chr5	57175765	0	0	PROMOTER	15.837	chr5:57175640-57175890	chr5	57175640	57175890	[15.83699]	181	+	57175946	GPBP1	ENST00000511209.5	1648	+	57174117	GPBP1	ENST00000506184.6	1716	+	57174049	GPBP1	ENST00000514387.6	1817	+	57173948	GPBP1	ENST00000424459.7
H929	7575	chr3	112302297	0	0	PROMOTER	12.9968	chr3:112302172-112302422	chr3	112302172	112302422	[12.99683]	181	+	112302478	RP11-90K6.1	ENST00000498032.5
H929	22338	chr11	7987139	0	1	PROMOTER	8.32742	chr11:7987014-7987264	chr11	7987014	7987264	[8.32742, 5.59]	181	+	7987320	EIF3F	ENST00000309828.4	214	+	7987353	EIF3F	ENST00000640290.1
H929	14297	chr6	27132569	0	0	PROMOTER	6.7305	chr6:27132444-27132694	chr6	27132444	27132694	[6.7305]	181	-	27132750	HIST1H2BJ	ENST00000607124.1:ENST00000339812.2	473	+	27133042	HIST1H2AG	ENST00000359193.3
H929	14339	chr6	27893644	0	0	PROMOTER	5.67647	chr6:27893519-27893769	chr6	27893519	27893769	[5.67647]	181	+	27893463	HIST1H2BO	ENST00000616182.1	495	-	27893149	HIST1H2AM	ENST00000359611.3
H929	6969	chr3	48473026	2	4	PROMOTER	12.2147	chr3:48472901-48473151	chr3	48472901	48473151	[12.21474, 6.71]	182	-	48473208	SHISA5	ENST00000426002.5
H929	23521	chr11	108467319	88	176	PROMOTER	10.8683	chr11:108467194-108467444	chr11	108467194	108467444	[2.87198, 10.86832]	182	-	108467501	C11orf65	ENST00000615746.4	212	-	108467531	C11orf65	ENST00000525729.5:ENST00000393084.5
H929	16849	chr7	102396181	0	0	PROMOTER	10.4512	chr7:102396056-102396306	chr7	102396056	102396306	[10.45118]	182	+	102396363	PRKRIP1	ENST00000397912.3
H929	32199	chr22	22893510	87	174	PROMOTER	6.35	chr22:22893385-22893635	chr22	22893385	22893635	[1.70517, 6.35]	182	+	22893692	IGLJ1	ENST00000390320.2	1865	+	22895375	IGLC1	ENST00000390321.2
H929	32531	chrM	830	0	0	PROMOTER	5.28681	chrM:705-955	chrM	705	955	[5.28681]	182	+	648	MT-RNR1	ENST00000389680.2	253	+	577	MT-TF	ENST00000387314.1	772	+	1602	MT-TV	ENST00000387342.1	841	+	1671	MT-RNR2	ENST00000387347.2
H929	21710	chr10	89332301	118	236	PROMOTER	13.1942	chr10:89332176-89332426	chr10	89332176	89332426	[5.59278, 13.19422]	183	+	89332484	IFIT3	ENST00000371811.4
H929	22812	chr11	63888730	2.45	5	PROMOTER	8.1241	chr11:63888605-63888855	chr11	63888605	63888855	[4.7, 8.1241]	183	+	63888547	MARK2	ENST00000509502.6
H929	23061	chr11	86193665	4.47	9	PROMOTER	6.08413	chr11:86193540-86193790	chr11	86193540	86193790	[6.08413, 1.4]	183	-	86193482	RP11-12D16.2	ENST00000530126.1
H929	28812	chr17	36072683	0	0	PROMOTER	5.64367	chr17:36072558-36072808	chr17	36072558	36072808	[5.64367]	183	+	36072866	AC069363.1	ENST00000620056.4	195	+	36072878	AC069363.1	ENST00000610845.1
H929	30690	chr19	13795275	4.47	9	PROMOTER	79.9246	chr19:13795150-13795400	chr19	13795150	13795400	[40.56, 79.92464]	185	+	13795460	ZSWIM4	ENST00000254323.6	1658	-	13796933	CTD-3252C9.2	ENST00000591242.1
H929	11015	chr5	32313194	8.49	17	PROMOTER	19.9146	chr5:32313069-32313319	chr5	32313069	32313319	[19.91461, 9.8]	185	-	32313009	MTMR12	ENST00000382142.7	225	-	32312969	MTMR12	ENST00000264934.5	256	-	32312938	MTMR12	ENST00000280285.9
H929	17927	chr8	37737751	67.54	148	PROMOTER	14.1541	chr8:37737626-37737876	chr8	37737626	37737876	[4.44521, 14.15409, 6.11]	185	+	37737566	ERLIN2	ENST00000519638.1	325	-	37737426	RP11-863K10.7	ENST00000330539.1	743	+	37737008	ERLIN2	ENST00000523107.5	1066	+	37736685	ERLIN2	ENST00000335171.10	1070	+	37736681	ERLIN2	ENST00000518586.5	1124	+	37736627	ERLIN2	ENST00000276461.9	1126	+	37736625	ERLIN2	ENST00000523887.5	1152	+
H929	22848	chr11	65503099	0	0	PROMOTER	11.7277	chr11:65502974-65503224	chr11	65502974	65503224	[11.72767]	185	+	65502914	RF01871	ENST00000618249.1	606	+	65503705	MALAT1	ENST00000612781.1	906	+	65504005	MALAT1	ENST00000618132.1	1251	+	65501848	MALAT1	ENST00000508832.2	1739	+	65504838	MALAT1	ENST00000618227.1
H929	24381	chr12	4538705	5	10	PROMOTER	6.31426	chr12:4538580-4538830	chr12	4538580	4538830	[6.31426, 2.37]	185	+	4538890	RAD51AP1	ENST00000228843.13:ENST00000352618.8	197	-	4538508	C12orf4	ENST00000545746.5	225	+	4538930	RAD51AP1	ENST00000544927.5	234	-	4538471	C12orf4	ENST00000261250.7
H929	28545	chr17	7572640	5	10	PROMOTER	54.9679	chr17:7572515-7572765	chr17	7572515	7572765	[54.96793, 32.43]	186	+	7572826	EIF4A1	ENST00000293831.12	186	+	7572826	RP11-186B7.4	ENST00000581621.1	197	+	7572837	EIF4A1	ENST00000577269.5	202	+	7572842	EIF4A1	ENST00000582746.5
H929	22847	chr11	65501662	0	0	PROMOTER	6.89691	chr11:65501537-65501787	chr11	65501537	65501787	[6.89691]	186	+	65501848	MALAT1	ENST00000508832.2	1252	+	65502914	RF01871	ENST00000618249.1
H929	19042	chr8	100310140	0	0	PROMOTER	12.465	chr8:100310015-100310265	chr8	100310015	100310265	[12.46503]	187	-	100310327	RNF19A	ENST00000341084.6
H929	17183	chr7	134646621	1	2	PROMOTER	10.2164	chr7:134646496-134646746	chr7	134646496	134646746	[4.62, 10.21642]	187	+	134646808	BPGM	ENST00000344924.7	190	+	134646811	BPGM	ENST00000418040.5	210	+	134646831	BPGM	ENST00000393132.2
H929	11152	chr5	37811402	16	32	PROMOTER	9.86053	chr5:37811277-37811527	chr5	37811277	37811527	[5.23, 9.86053]	187	+	37811589	GDNF-AS1	ENST00000637595.1
H929	5027	chr2	121649837	0	0	PROMOTER	5.16265	chr2:121649712-121649962	chr2	121649712	121649962	[5.16265]	187	+	121649650	NIFK-AS1	ENST00000414554.6	250	-	121649587	CLASP1	ENST00000409078.7	263	+	121650100	NIFK-AS1	ENST00000419902.2	361	-	121649476	CLASP1	ENST00000263710.8:ENST00000397587.7:ENST00000541377.5	399	-	121649438	CLASP1	ENST00000455322.6
H929	20686	chr9	114682254	0	0	PROMOTER	8.52895	chr9:114682129-114682379	chr9	114682129	114682379	[8.52895]	188	-	114682066	RP11-402G3.3	ENST00000436752.2:ENST00000612244.5
H929	24322	chr12	752405	9	18	PROMOTER	5.638	chr12:752280-752530	chr12	752280	752530	[4.62, 5.638]	188	+	752593	WNK1	ENST00000535572.5	518	+	752923	WNK1	ENST00000530271.6:ENST00000315939.10:ENST00000340908.8:ENST00000537687.5	651	+	753056	WNK1	ENST00000447667.2
H929	8440	chr3	187368521	0	0	PROMOTER	5.68548	chr3:187368396-187368646	chr3	187368396	187368646	[5.68548]	189	+	187368332	RTP4	ENST00000259030.2
H929	3525	chr1	234963378	4.47	9	PROMOTER	13.1605	chr1:234963253-234963503	chr1	234963253	234963503	[13.16047, 3.52]	190	-	234963188	RP11-443B7.1	ENST00000423175.1	621	-	234963999	RP11-443B7.1	ENST00000418557.1
H929	32539	chrM	5321	0	0	PROMOTER	20.2823	chrM:5196-5446	chrM	5196	5446	[20.28231]	191	+	5512	MT-TW	ENST00000387382.1	334	-	5655	MT-TA	ENST00000387392.1	408	-	5729	MT-TN	ENST00000387400.1	505	-	5826	MT-TC	ENST00000387405.1	570	-	5891	MT-TY	ENST00000387409.1	583	+	5904	MT-CO1	ENST00000361624.2	851	+	4470	MT-ND2	ENST00000361453.3	919	+
H929	2715	chr1	185317588	1	2	PROMOTER	19.0371	chr1:185317463-185317713	chr1	185317463	185317713	[19.03708, 8.49]	191	+	185317779	GS1-279B7.2	ENST00000609881.1	259	-	185317329	IVNS1ABP	ENST00000367498.7
H929	27161	chr15	63834079	0	1	PROMOTER	12.1774	chr15:63833954-63834204	chr15	63833954	63834204	[12.17742, 6.32]	191	-	63833888	HERC1	ENST00000443617.6
H929	1135	chr1	121185001	1.41	3	PROMOTER	10.2164	chr1:121184876-121185126	chr1	121184876	121185126	[10.21642, 3.03]	191	+	121184810	SRGAP2C	ENST00000367123.7	538	-	121185539	FAM72B	ENST00000471903.6	661	-	121184340	FAM72B	ENST00000369390.7	687	-	121184314	FAM72B	ENST00000619376.4	709	-	121184292	FAM72B	ENST00000452190.2	1090	-	121183911	FAM72B	ENST00000355228.8
H929	17575	chr8	17922649	8.49	17	PROMOTER	10.1002	chr8:17922524-17922774	chr8	17922524	17922774	[10.10021, 4.59]	191	+	17922840	PCM1	ENST00000325083.12	208	+	17922857	PCM1	ENST00000327578.9	350	+	17922999	PCM1	ENST00000518537.5	379	+	17923028	PCM1	ENST00000519253.5
H929	27329	chr15	75579480	0	0	PROMOTER	6.03541	chr15:75579355-75579605	chr15	75579355	75579605	[6.03541]	191	-	75579289	PTPN9	ENST00000618819.4:ENST00000306726.6
H929	14931	chr6	81752516	0	0	PROMOTER	9.64838	chr6:81752391-81752641	chr6	81752391	81752641	[9.64838]	192	-	81752708	LINC01526	ENST00000320172.10:ENST00000369754.7	258	-	81752774	LINC01526	ENST00000369756.3
H929	17392	chr7	155070131	3	6	PROMOTER	10.1321	chr7:155070006-155070256	chr7	155070006	155070256	[7.64, 10.13212]	193	+	155070324	HTR5A	ENST00000287907.2	1426	-	155071557	AC093726.4	ENST00000395731.5
H929	15540	chr6	132814247	9	18	PROMOTER	6.94638	chr6:132814122-132814372	chr6	132814122	132814372	[5.61, 6.94638]	194	+	132814441	RPS12	ENST00000230050.3	1060	+	132815307	SNORD101	ENST00000384027.1
H929	28718	chr17	28750273	0	0	PROMOTER	5.59211	chr17:28750148-28750398	chr17	28750148	28750398	[5.59211]	194	-	28750079	AC010761.10	ENST00000579468.1
H929	30660	chr19	12722766	0	0	PROMOTER	5.07554	chr19:12722641-12722891	chr19	12722641	12722891	[5.07554]	194	-	12722572	TNPO2	ENST00000592287.5	411	-	12722355	TNPO2	ENST00000356861.9	1051	-	12721715	TNPO2	ENST00000450764.6	1230	-	12723996	TNPO2	ENST00000425528.5	1245	-	12724011	TNPO2	ENST00000588216.5
H929	2787	chr1	192516995	3.46	7	PROMOTER	7.97	chr1:192516870-192517120	chr1	192516870	192517120	[7.97, 1.11]	195	+	192517190	RP5-1011O1.3	ENST00000642657.1
H929	30788	chr19	27793176	5.48	11	PROMOTER	6.44607	chr19:27793051-27793301	chr19	27793051	27793301	[2.06, 6.44607]	195	-	27793371	CTC-459F4.2	ENST00000586954.1	202	-	27793378	CTC-459F4.2	ENST00000588027.5	218	-	27793394	CTC-459F4.2	ENST00000590677.5	287	+	27793463	CTC-459F4.3	ENST00000588122.5	307	+	27793483	CTC-459F4.3	ENST00000586784.1	312	+	27793488	LLNLF-65H9.1	ENST00000592806.1	318	+	27793494	CTC-459F4.3	ENST00000590628.1	319	+
H929	9344	chr4	83034894	5	10	PROMOTER	29.5842	chr4:83034769-83035019	chr4	83034769	83035019	[29.5842, 15.41]	196	+	83035090	COPS4	ENST00000264389.6	313	+	83035207	COPS4	ENST00000503682.5	331	+	83035225	COPS4	ENST00000511653.1	447	+	83034447	COPS4	ENST00000509093.5
H929	7842	chr3	134795066	0	0	PROMOTER	9.00732	chr3:134794941-134795191	chr3	134794941	134795191	[9.00732]	196	+	134795262	EPHB1	ENST00000398015.7
H929	17558	chr8	14879623	0	1	PROMOTER	5.59729	chr8:14879498-14879748	chr8	14879498	14879748	[5.59729, 2.01]	196	-	14879819	CTD-2023J5.1	ENST00000532973.2
H929	26987	chr15	45200435	7.48	15	PROMOTER	10.2164	chr15:45200310-45200560	chr15	45200310	45200560	[5.62, 10.21642]	197	-	45200632	CTD-2651B20.6	ENST00000563103.1	740	-	45201175	SHF	ENST00000290894.12	1296	-	45199139	CTD-2651B20.7	ENST00000568314.1
H929	32602	chrX	990418	0	0	PROMOTER	6.1476	chrX:990293-990543	chrX	990293	990543	[6.1476]	197	+	990221	RP11-309M23.1	ENST00000420865.6
H929	24800	chr12	56688605	0	0	PROMOTER	5.07554	chr12:56688480-56688730	chr12	56688480	56688730	[5.07554]	197	-	56688408	PTGES3	ENST00000614328.4	230	-	56688375	PTGES3	ENST00000456859.2	305	-	56688300	PTGES3	ENST00000262033.10	318	-	56688287	PTGES3	ENST00000414274.7	321	-	56688284	PTGES3	ENST00000448157.6	443	-	56688162	PTGES3	ENST00000436399.6
H929	17714	chr8	27837884	4.47	9	PROMOTER	14.5804	chr8:27837759-27838009	chr8	27837759	27838009	[14.58038, 7.4]	198	-	27838082	PBK	ENST00000522944.5	211	-	27838095	PBK	ENST00000301905.8
H929	28868	chr17	40561211	5.48	11	PROMOTER	9.38617	chr17:40561086-40561336	chr17	40561086	40561336	[2.25, 9.38617]	198	-	40561013	CCR7	ENST00000579344.1
H929	25711	chr13	41061472	14	28	PROMOTER	8.80963	chr13:41061347-41061597	chr13	41061347	41061597	[8.80963, 3.6]	198	+	41061274	WBP4	ENST00000379487.4
H929	11783	chr5	76875499	0	0	PROMOTER	7.33568	chr5:76875374-76875624	chr5	76875374	76875624	[7.33568]	198	+	76875301	S100Z	ENST00000613039.1
H929	29387	chr17	80261068	0	0	PROMOTER	6.75547	chr17:80260943-80261193	chr17	80260943	80261193	[6.75547]	198	+	80260870	RNF213	ENST00000319921.4	200	+	80260868	RNF213	ENST00000582970.5	202	+	80260866	RNF213	ENST00000508628.6
H929	31026	chr19	48445971	7.48	15	PROMOTER	5.04	chr19:48445846-48446096	chr19	48445846	48446096	[4.66153, 5.04]	198	+	48445773	GRWD1	ENST00000253237.9
H929	29449	chr18	3449452	2.45	5	PROMOTER	26.166	chr18:3449327-3449577	chr18	3449327	3449577	[9.99, 26.166]	199	+	3449651	TGIF1	ENST00000405385.7	252	+	3449704	TGIF1	ENST00000343820.9	430	+	3449882	TGIF1	ENST00000407501.6	725	+	3450177	TGIF1	ENST00000551402.1	760	+	3450212	TGIF1	ENST00000577543.5	1843	+	3447609	TGIF1	ENST00000618001.4
H929	1326	chr1	149845617	0	0	PROMOTER	10.8927	chr1:149845492-149845742	chr1	149845492	149845742	[10.89274]	199	+	149845816	RP11-196G18.24	ENST00000608318.1
H929	19277	chr8	109334125	0	1	PROMOTER	9.22244	chr8:109334000-109334250	chr8	109334000	109334250	[9.22244, 7.97]	199	+	109334324	ENY2	ENST00000521662.5:ENST00000521688.5	219	+	109334344	ENY2	ENST00000520147.5	260	-	109334385	NUDCD1	ENST00000239690.8
H929	30512	chr19	4791482	0	0	PROMOTER	7.39054	chr19:4791357-4791607	chr19	4791357	4791607	[7.39054]	199	+	4791681	FEM1A	ENST00000269856.4	275	-	4791207	AC005523.3	ENST00000598782.1
H929	26330	chr14	73458817	5	10	PROMOTER	127.42	chr14:73458692-73458942	chr14	73458692	73458942	[127.41979, 112.52]	200	-	73458617	NUMB	ENST00000554546.5	237	-	73458580	NUMB	ENST00000555394.5	287	-	73458530	NUMB	ENST00000555238.5	295	-	73458522	NUMB	ENST00000557597.5	298	-	73458519	NUMB	ENST00000356296.8
H929	30669	chr19	13154393	0	0	PROMOTER	9.44255	chr19:13154268-13154518	chr19	13154268	13154518	[9.44255]	200	-	13154193	CTC-250I14.6	ENST00000592882.1
H929	29546	chr18	11689156	0	0	PROMOTER	8.63962	chr18:11689031-11689281	chr18	11689031	11689281	[8.63962]	200	+	11688956	GNAL	ENST00000334049.10
H929	18588	chr8	74350618	5	10	PROMOTER	7.46411	chr8:74350493-74350743	chr8	74350493	74350743	[5.41, 7.46411]	200	+	74350418	GDAP1	ENST00000434412.2	236	+	74350382	GDAP1	ENST00000220822.11	568	-	74350050	CTD-2320G14.2	ENST00000521872.1
H929	11422	chr5	56815775	4	8	PROMOTER	14.1034	chr5:56815650-56815900	chr5	56815650	56815900	[14.10338, 7.15]	201	+	56815574	MAP3K1	ENST00000399503.3
H929	15795	chr6	150720887	0	0	PROMOTER	7.66674	chr6:150720762-150721012	chr6	150720762	150721012	[7.66674]	201	+	150721088	PLEKHG1	ENST00000358517.6
H929	28920	chr17	45135445	0	0	PROMOTER	9.00732	chr17:45135320-45135570	chr17	45135320	45135570	[9.00732]	202	+	45135647	ACBD4	ENST00000586346.5	242	+	45135687	ACBD4	ENST00000398322.7	245	+	45135690	ACBD4	ENST00000592162.5	249	+	45135694	ACBD4	ENST00000376955.8	263	+	45135708	ACBD4	ENST00000321854.12
H929	32549	chrM	12540	0	0	PROMOTER	14.1976	chrM:12415-12665	chrM	12415	12665	[14.19763]	203	+	12337	MT-ND5	ENST00000361567.2	274	+	12266	MT-TL2	ENST00000387456.1	333	+	12207	MT-TS2	ENST00000387449.1	402	+	12138	MT-TH	ENST00000387441.1	1780	+	10760	MT-ND4	ENST00000361381.2
H929	28252	chr16	75434039	0	0	PROMOTER	6.08413	chr16:75433914-75434164	chr16	75433914	75434164	[6.08413]	203	+	75433836	RP11-77K12.9	ENST00000621929.1	554	-	75433485	CFDP1	ENST00000283882.3
H929	3404	chr1	226675270	11	22	PROMOTER	5.34677	chr1:226675145-226675395	chr1	226675145	226675395	[5.34677, 3.39]	203	-	226675067	RP11-115P16.3	ENST00000412918.1
H929	17578	chr8	18210334	0	0	PROMOTER	6.08413	chr8:18210209-18210459	chr8	18210209	18210459	[6.08413]	204	+	18210130	NAT1	ENST00000518029.5	225	+	18210109	NAT1	ENST00000541942.1	241	+	18210093	NAT1	ENST00000307719.8	1888	+	18212222	NAT1	ENST00000517492.5
H929	564	chr1	44721697	2	4	PROMOTER	42.1174	chr1:44721572-44721822	chr1	44721572	44721822	[42.11735, 16.47]	205	-	44721902	RNU5F-1	ENST00000362507.1
H929	22278	chr11	616204	4	8	PROMOTER	8.20913	chr11:616079-616329	chr11	616079	616329	[5.98, 8.20913]	205	-	615999	IRF7	ENST00000397574.6	234	-	615970	IRF7	ENST00000330243.9	476	-	615728	IRF7	ENST00000397566.5:ENST00000397570.5	554	-	615650	IRF7	ENST00000348655.10	578	-	615626	IRF7	ENST00000525445.5
H929	31010	chr19	48249565	5.48	11	PROMOTER	11.0663	chr19:48249440-48249690	chr19	48249440	48249690	[11.06635, 3.47]	206	-	48249771	CARD8	ENST00000522431.5	261	-	48249826	CARD8	ENST00000520153.5	268	-	48249833	CARD8	ENST00000520015.5	282	-	48249847	CARD8	ENST00000447740.6
H929	18388	chr8	65634423	0	0	PROMOTER	10.1487	chr8:65634298-65634548	chr8	65634298	65634548	[10.14867]	206	-	65634217	ARMC1	ENST00000458464.3	216	-	65634207	ARMC1	ENST00000276569.7
H929	17572	chr8	17697464	119	238	PROMOTER	9.22241	chr8:17697339-17697589	chr8	17697339	17697589	[3.23852, 9.22241]	206	-	17697670	MTUS1	ENST00000297488.10
H929	13008	chr5	140401160	2.45	5	PROMOTER	37.9317	chr5:140401035-140401285	chr5	140401035	140401285	[37.93167, 14.68]	207	-	140401367	CTC-329D1.2	ENST00000507521.1	654	+	140401814	ANKHD1	ENST00000297183.10:ENST00000360839.6:ENST00000616482.4	694	+	140401854	ANKHD1	ENST00000394723.7	748	+	140401908	ANKHD1-EIF4EBP3	ENST00000532219.5	761	+	140401921	ANKHD1	ENST00000394722.7
H929	30540	chr19	6717535	4	8	PROMOTER	9	chr19:6717410-6717660	chr19	6717410	6717660	[5.22414, 9.0]	207	-	6717742	CTD-3128G10.7	ENST00000614781.1
H929	648	chr1	53838653	0	0	PROMOTER	5.55172	chr1:53838528-53838778	chr1	53838528	53838778	[5.55172]	207	-	53838860	NDC1	ENST00000371429.3
H929	30623	chr19	10717871	5	10	PROMOTER	83.6403	chr19:10717746-10717996	chr19	10717746	10717996	[71.99, 83.6403]	208	+	10718079	DNM2	ENST00000585892.5	222	+	10718093	DNM2	ENST00000359692.10	260	+	10718131	DNM2	ENST00000389253.8	292	+	10718163	DNM2	ENST00000355667.10	337	+	10718208	DNM2	ENST00000408974.8	533	+	10718404	MIR638	ENST00000385237.1
H929	13233	chr5	150758728	2	4	PROMOTER	38.1073	chr5:150758603-150758853	chr5	150758603	150758853	[25.92, 38.10726]	208	-	150758520	DCTN4	ENST00000424236.5	307	-	150759035	DCTN4	ENST00000446090.6:ENST00000627368.2	381	-	150759109	DCTN4	ENST00000447998.6
H929	26247	chr14	67816797	9	18	PROMOTER	27.6518	chr14:67816672-67816922	chr14	67816672	67816922	[27.65181, 15.7]	208	-	67816589	ZFYVE26	ENST00000347230.8	210	-	67816587	ZFYVE26	ENST00000555452.1
H929	24411	chr12	6663356	4	8	PROMOTER	15.4783	chr12:6663231-6663481	chr12	6663231	6663481	[15.47831, 7.4]	208	-	6663148	ING4	ENST00000341550.8	214	-	6663142	ING4	ENST00000619641.4:ENST00000446105.6	216	-	6663140	ING4	ENST00000396807.8	255	-	6663101	ING4	ENST00000412586.6:ENST00000423703.6:ENST00000444704.5
H929	6103	chr2	219177898	7.48	15	PROMOTER	9.63499	chr2:219177773-219178023	chr2	219177773	219178023	[9.63499, 4.42]	208	-	219178106	CNPPD1	ENST00000409789.5	319	+	219178217	RETREG2	ENST00000430297.6	932	-	219176966	CNPPD1	ENST00000360507.9
H929	20053	chr9	33474138	0	0	PROMOTER	5.88327	chr9:33474013-33474263	chr9	33474013	33474263	[5.88327]	208	-	33473930	NOL6	ENST00000379471.3
H929	16399	chr7	44606848	0	0	PROMOTER	10.9568	chr7:44606723-44606973	chr7	44606723	44606973	[10.95677]	209	+	44606639	OGDH	ENST00000222673.5	220	+	44606628	OGDH	ENST00000444676.5:ENST00000631326.2	257	+	44606591	OGDH	ENST00000447398.5:ENST00000449767.5	260	+	44606588	OGDH	ENST00000443864.6	276	+	44606572	OGDH	ENST00000439616.6
H929	17803	chr8	30744399	1.41	3	PROMOTER	7.47906	chr8:30744274-30744524	chr8	30744274	30744524	[7.47906, 5.24]	209	+	30744190	UBXN8	ENST00000615729.4	210	+	30744189	UBXN8	ENST00000341403.9	234	+	30744165	UBXN8	ENST00000265616.9
H929	17588	chr8	19013477	0	1	PROMOTER	7.06118	chr8:19013352-19013602	chr8	19013352	19013602	[7.06118, 1.92]	209	-	19013686	PSD3	ENST00000327040.12:ENST00000440756.4
H929	24512	chr12	21501341	0	1	PROMOTER	13.5764	chr12:21501216-21501466	chr12	21501216	21501466	[13.5764, 3.69]	210	-	21501551	RECQL	ENST00000421138.6	252	-	21501593	RECQL	ENST00000444129.6	452	+	21501793	GOLT1B	ENST00000542038.5	474	+	21501815	GOLT1B	ENST00000540141.5:ENST00000229314.9	489	+	21501830	GOLT1B	ENST00000631252.2
H929	16983	chr7	112790802	0	0	PROMOTER	6.16321	chr7:112790677-112790927	chr7	112790677	112790927	[6.16321]	210	-	112790592	TMEM168	ENST00000312814.10	409	-	112790393	TMEM168	ENST00000454074.5
H929	30530	chr19	6393250	0	0	PROMOTER	5.51551	chr19:6393125-6393375	chr19	6393125	6393375	[5.51551]	210	-	6393460	GTF2F1	ENST00000394456.9	267	-	6392983	MIR6790	ENST00000611058.1
H929	20836	chr9	128683865	0	0	PROMOTER	5.39891	chr9:128683740-128683990	chr9	128683740	128683990	[5.39891]	210	+	128683655	SET	ENST00000372692.8	1218	+	128685083	SET	ENST00000409104.7
H929	13467	chr5	160119634	1.41	3	PROMOTER	74.0872	chr5:160119509-160119759	chr5	160119509	160119759	[52.25, 74.08718]	211	-	160119423	PWWP2A	ENST00000456329.7:ENST00000307063.8	212	-	160119422	PWWP2A	ENST00000523662.1
H929	28884	chr17	42388779	4.47	9	PROMOTER	13.938	chr17:42388654-42388904	chr17	42388654	42388904	[10.28, 13.93799]	211	-	42388568	STAT3	ENST00000264657.9	297	-	42388482	STAT3	ENST00000588969.5	340	-	42388439	STAT3	ENST00000585517.5	348	-	42388431	STAT3	ENST00000389272.7	365	-	42388414	STAT3	ENST00000404395.3
H929	13995	chr6	10695008	0	0	PROMOTER	6.72893	chr6:10694883-10695133	chr6	10694883	10695133	[6.72893]	211	-	10694797	C6orf52	ENST00000503680.1	313	+	10694695	PAK1IP1	ENST00000379568.3	399	-	10694609	C6orf52	ENST00000379586.5	402	-	10694606	C6orf52	ENST00000259983.7	475	-	10694533	C6orf52	ENST00000460742.6
H929	7082	chr3	58214908	17.49	35	PROMOTER	5.58536	chr3:58214783-58215033	chr3	58214783	58215033	[5.58536, 1.24]	211	-	58214697	DNASE1L3	ENST00000483681.5
H929	5506	chr2	173965490	0	0	PROMOTER	16.451	chr2:173965365-173965615	chr2	173965365	173965615	[16.45097]	212	-	173965702	SP3	ENST00000310015.10	1271	-	173964219	SP3	ENST00000418194.6	1655	-	173963835	SP3	ENST00000640958.1
H929	26962	chr15	43824590	104.08	227	PROMOTER	10.1987	chr15:43824465-43824715	chr15	43824465	43824715	[1.48, 4.08, 10.19874]	212	-	43824802	MFAP1	ENST00000267812.3
H929	18565	chr8	73746627	0	0	PROMOTER	6.84445	chr8:73746502-73746752	chr8	73746502	73746752	[6.84445]	213	-	73746840	STAU2	ENST00000523558.5:ENST00000521210.5:ENST00000355780.9:ENST00000524104.5	252	-	73746879	STAU2	ENST00000517542.5	257	-	73746884	STAU2	ENST00000521451.5	261	-	73746888	STAU2	ENST00000521419.5	310	-	73746937	STAU2	ENST00000524300.5	1070	-	73747697	STAU2	ENST00000521727.5	1081	-	73747708	STAU2	ENST00000522509.5
H929	20115	chr9	37800768	0	0	PROMOTER	20.7975	chr9:37800643-37800893	chr9	37800643	37800893	[20.79746]	214	+	37800554	DCAF10	ENST00000242323.8	266	+	37800502	DCAF10	ENST00000377724.7
H929	2295	chr1	171314020	1.41	3	PROMOTER	13.0252	chr1:171313895-171314145	chr1	171313895	171314145	[3.01, 13.02516]	214	+	171314234	FMO4	ENST00000367749.3
H929	21568	chr10	76887830	0	1	PROMOTER	7.74077	chr10:76887705-76887955	chr10	76887705	76887955	[7.74077, 2.17]	214	+	76888044	RP11-443A13.5	ENST00000429850.2	232	+	76888062	RP11-443A13.5	ENST00000595702.1	383	+	76888213	RP11-443A13.5	ENST00000426234.5
H929	21081	chr10	12043385	0	0	PROMOTER	10.7161	chr10:12043260-12043510	chr10	12043260	12043510	[10.71606]	215	-	12043170	UPF2	ENST00000397053.6	551	-	12042834	UPF2	ENST00000357604.9
H929	2345	chr1	172532134	0	0	PROMOTER	8.39279	chr1:172532009-172532259	chr1	172532009	172532259	[8.39279]	215	+	172532349	SUCO	ENST00000367723.8	339	+	172532473	SUCO	ENST00000608151.5	984	+	172533118	SUCO	ENST00000616058.4	1049	+	172533183	SUCO	ENST00000610051.5	1083	+	172533217	SUCO	ENST00000263688.3
H929	27506	chr15	90716834	0	0	PROMOTER	7.32451	chr15:90716709-90716959	chr15	90716709	90716959	[7.32451]	215	-	90717049	RP11-387D10.2	ENST00000558105.1	307	-	90717141	RP11-387D10.2	ENST00000559531.1	493	+	90717327	BLM	ENST00000355112.7	560	+	90717394	BLM	ENST00000560509.5
H929	10014	chr4	151276955	0	0	PROMOTER	8.80963	chr4:151276830-151277080	chr4	151276830	151277080	[8.80963]	216	+	151277171	PRSS48	ENST00000441586.2:ENST00000455694.6
H929	24570	chr12	31887420	5	10	PROMOTER	17.451	chr12:31887295-31887545	chr12	31887295	31887545	[17.45105, 7.56]	217	-	31887203	RP11-428G5.5	ENST00000535163.1
H929	32816	chrX	55160885	39	78	PROMOTER	6.80745	chrX:55160760-55161010	chrX	55160760	55161010	[6.80745, 4.66]	217	-	55161102	FAM104B	ENST00000489298.1	234	-	55161119	FAM104B	ENST00000477847.6	297	-	55161182	FAM104B	ENST00000472571.2	310	-	55161195	FAM104B	ENST00000332132.8:ENST00000425133.2	425	-	55161310	FAM104B	ENST00000358460.8
H929	25930	chr14	22556422	1	2	PROMOTER	17.1078	chr14:22556297-22556547	chr14	22556297	22556547	[17.10778, 12.73]	218	+	22556640	AE000662.92	ENST00000557595.1	640	-	22557062	AE000662.93	ENST00000557232.1
H929	29012	chr17	51121083	0	0	PROMOTER	6.82637	chr17:51120958-51121208	chr17	51120958	51121208	[6.82637]	218	-	51120865	SPAG9	ENST00000262013.11:ENST00000618113.4:ENST00000357122.8	349	-	51120734	SPAG9	ENST00000505279.5
H929	14230	chr6	26104095	74.7	165	PROMOTER	7.87189	chr6:26103970-26104220	chr6	26103970	26104220	[4.68, 7.87189, 4.15]	219	+	26103876	HIST1H4C	ENST00000377803.3
H929	24786	chr12	56042137	0	0	PROMOTER	7.62223	chr12:56042012-56042262	chr12	56042012	56042262	[7.62223]	219	+	56041918	RPS26	ENST00000646449.1	244	+	56041893	RPS26	ENST00000552361.1	331	-	56041806	RP11-603J24.4	ENST00000551846.1	786	+	56041351	RPS26	ENST00000356464.10
H929	29138	chr17	63550242	0	0	PROMOTER	6.24045	chr17:63550117-63550367	chr17	63550117	63550367	[6.24045]	219	+	63550461	DCAF7	ENST00000614556.4	258	+	63550500	DCAF7	ENST00000415273.2
H929	17841	chr8	33513821	0	0	PROMOTER	21.6	chr8:33513696-33513946	chr8	33513696	33513946	[21.6]	220	-	33513601	TTI2	ENST00000431156.6	346	+	33513475	SNORD13	ENST00000459299.1	636	-	33513185	TTI2	ENST00000613904.1	712	-	33513109	TTI2	ENST00000360742.9	1109	-	33512712	TTI2	ENST00000520636.5
H929	11377	chr5	55307980	0	0	PROMOTER	5.638	chr5:55307855-55308105	chr5	55307855	55308105	[5.638]	220	+	55307760	MTREX	ENST00000230640.9	258	-	55307722	DHX29	ENST00000251636.9	306	-	55307674	DHX29	ENST00000621106.4
H929	14238	chr6	26158367	0	0	PROMOTER	5.15355	chr6:26158242-26158492	chr6	26158242	26158492	[5.15355]	221	+	26158146	HIST1H2BD	ENST00000377777.5:ENST00000289316.2
H929	32152	chr21	46184698	7.48	15	PROMOTER	50.7209	chr21:46184573-46184823	chr21	46184573	46184823	[40.0, 50.7209]	222	-	46184476	SPATC1L	ENST00000330205.10	239	-	46184459	SPATC1L	ENST00000291672.5	381	+	46185079	AP001468.58	ENST00000415026.1
H929	30847	chr19	38850111	0	0	PROMOTER	10.3732	chr19:38849986-38850236	chr19	38849986	38850236	[10.37319]	222	-	38850333	HNRNPL	ENST00000221419.9
H929	14278	chr6	26365488	27.89	67	PROMOTER	8.59258	chr6:26365363-26365613	chr6	26365363	26365613	[3.91, 8.59258, 8.34]	222	+	26365266	BTN3A2	ENST00000396948.5	224	+	26365264	BTN3A2	ENST00000377708.6	257	+	26365231	BTN3A2	ENST00000527422.5:ENST00000356386.6	329	+	26365159	BTN3A2	ENST00000396934.7:ENST00000508906.6
H929	7561	chr3	111979275	3.46	7	PROMOTER	5.09	chr3:111979150-111979400	chr3	111979150	111979400	[4.44521, 5.09]	222	+	111979053	ABHD10	ENST00000494817.1	240	+	111979035	ABHD10	ENST00000273359.7
H929	5555	chr2	177164739	2	4	PROMOTER	11.7875	chr2:177164614-177164864	chr2	177164614	177164864	[11.7875, 3.39]	223	-	177164516	AC079305.11	ENST00000441205.1
H929	28688	chr17	21533198	0	1	PROMOTER	36.8243	chr17:21533073-21533323	chr17	21533073	21533323	[15.56, 36.8243]	224	+	21532974	RP11-822E23.2	ENST00000579239.1
H929	977	chr1	109596449	7	14	PROMOTER	7.97	chr1:109596324-109596574	chr1	109596324	109596574	[1.66, 7.97]	224	+	109596225	RP5-1160K1.3	ENST00000436416.1
H929	8	chr1	1779017	0	0	PROMOTER	10.4314	chr1:1778892-1779142	chr1	1778892	1779142	[10.43143]	227	-	1778790	NADK	ENST00000341991.7	547	-	1778470	NADK	ENST00000341426.9	1052	-	1780069	NADK	ENST00000378625.5
H929	30497	chr19	3721510	0	0	PROMOTER	5.52972	chr19:3721385-3721635	chr19	3721385	3721635	[5.52972]	227	+	3721737	TJP3	ENST00000589378.5
H929	28095	chr16	56941256	0	0	PROMOTER	8.70259	chr16:56941131-56941381	chr16	56941131	56941381	[8.70259]	228	+	56941028	RP11-325K4.2	ENST00000570210.1	978	+	56940278	RP11-325K4.3	ENST00000565861.1
H929	32768	chrX	41333576	0	0	PROMOTER	6.03541	chrX:41333451-41333701	chrX	41333451	41333701	[6.03541]	228	+	41333348	DDX3X	ENST00000629496.3:ENST00000625837.2:ENST00000626301.2	292	+	41333284	DDX3X	ENST00000644876.1	337	+	41333913	DDX3X	ENST00000457138.7	436	+	41334012	DDX3X	ENST00000643821.1	586	+	41334162	DDX3X	ENST00000441189.4:ENST00000644513.1:ENST00000644109.1:ENST00000646122.1:ENST00000644074.1:ENST00000399959.7	599	+	41334175	DDX3X	ENST00000646319.1	1030	+	41334606	DDX3X	ENST00000644073.1	1034	+
H929	19475	chr8	120445157	7	14	PROMOTER	24.7924	chr8:120445032-120445282	chr8	120445032	120445282	[24.79241, 11.59]	229	-	120445386	MRPL13	ENST00000306185.7	269	+	120445426	MTBP	ENST00000305949.5
H929	25190	chr12	101408050	0	0	PROMOTER	10.8375	chr12:101407925-101408175	chr12	101407925	101408175	[10.83751]	230	-	101407820	ARL1	ENST00000261636.12	297	-	101407753	ARL1	ENST00000551671.5	301	-	101407749	ARL1	ENST00000551688.1	304	-	101407746	ARL1	ENST00000539055.5	587	-	101407463	ARL1	ENST00000551828.5	589	-	101407461	ARL1	ENST00000536227.5	1010	-	101409060	RP11-321F8.4	ENST00000547360.1
H929	6106	chr2	219253013	0	0	PROMOTER	6.84634	chr2:219252888-219253138	chr2	219252888	219253138	[5.59, 6.84634]	230	+	219253243	TUBA4B	ENST00000490341.2	1019	-	219254032	TUBA4A	ENST00000248437.8	1595	-	219254608	TUBA4A	ENST00000392088.6
H929	31905	chr20	63864998	0	0	PROMOTER	5.98221	chr20:63864873-63865123	chr20	63864873	63865123	[5.98221]	230	+	63865228	TPD52L2	ENST00000611972.4:ENST00000615907.4	245	+	63865243	TPD52L2	ENST00000369927.8	292	+	63865290	TPD52L2	ENST00000346249.8:ENST00000348257.9:ENST00000352482.8	296	+	63865294	TPD52L2	ENST00000217121.9:ENST00000351424.8:ENST00000358548.4	705	-	63864293	RP4-591C20.9	ENST00000601296.2
H929	22837	chr11	65425321	0	0	PROMOTER	5.11069	chr11:65425196-65425446	chr11	65425196	65425446	[5.11069]	230	+	65425551	NEAT1	ENST00000616315.2	1361	+	65423960	RF01957	ENST00000613347.1	1683	+	65423638	RF01956	ENST00000620525.1	1782	+	65423539	NEAT1	ENST00000642367.1
H929	19615	chr8	127735203	2.45	5	PROMOTER	12.1192	chr8:127735078-127735328	chr8	127735078	127735328	[12.11925, 5.45]	231	+	127735434	MYC	ENST00000259523.10	270	+	127735473	MYC	ENST00000641252.1	843	+	127736046	MYC	ENST00000641036.1	866	+	127736069	MYC	ENST00000621592.5	881	+	127736084	MYC	ENST00000377970.6	1017	+	127736220	MYC	ENST00000524013.1	1236	-	127733967	RP11-1136L8.1	ENST00000502463.7:ENST00000519071.5	1391	+
H929	8432	chr3	186783316	1.41	3	PROMOTER	7.2732	chr3:186783191-186783441	chr3	186783191	186783441	[2.4, 7.2732]	231	+	186783547	EIF4A2	ENST00000323963.9	261	+	186783577	EIF4A2	ENST00000440191.6	863	-	186784179	RP11-573D15.9	ENST00000577781.1	1480	+	186784796	SNORD2	ENST00000459163.1
H929	14379	chr6	28896298	9	18	PROMOTER	11.6488	chr6:28896173-28896423	chr6	28896173	28896423	[11.64881, 3.86]	232	+	28896530	HCG14	ENST00000444986.1
H929	9009	chr4	41693029	0	0	PROMOTER	9.22241	chr4:41692904-41693154	chr4	41692904	41693154	[9.22241]	232	-	41692797	RP11-227F19.5	ENST00000506475.1
H929	14222	chr6	26031828	116.5	233	PROMOTER	7.49674	chr6:26031703-26031953	chr6	26031703	26031953	[7.49674, 2.74081]	232	-	26032060	HIST1H3B	ENST00000621411.1	1740	-	26033568	HIST1H2AB	ENST00000615868.1
H929	30572	chr19	7829999	6	12	PROMOTER	72.82	chr19:7829874-7830124	chr19	7829874	7830124	[70.05283, 72.82]	234	+	7830233	EVI5L	ENST00000270530.8
H929	3318	chr1	221742410	0	0	PROMOTER	8.10232	chr1:221742285-221742535	chr1	221742285	221742535	[8.10232]	234	-	221742176	DUSP10	ENST00000366899.3
H929	841	chr1	77682424	0	0	PROMOTER	5.68548	chr1:77682299-77682549	chr1	77682299	77682549	[5.68548]	234	-	77682658	ZZZ3	ENST00000370801.7	995	-	77683419	ZZZ3	ENST00000370798.5
H929	2215	chr1	169368205	4	8	PROMOTER	37.535	chr1:169368080-169368330	chr1	169368080	169368330	[30.65, 37.53495]	235	+	169367970	BLZF1	ENST00000367807.7:ENST00000367808.7:ENST00000329281.6	238	-	169367967	NME7	ENST00000367811.7	259	-	169367946	NME7	ENST00000472647.5
H929	5779	chr2	196176268	7.48	15	PROMOTER	11.6488	chr2:196176143-196176393	chr2	196176143	196176393	[3.33, 11.64881]	235	-	196176503	STK17B	ENST00000409228.5
H929	31554	chr20	45972407	6	12	PROMOTER	9.92072	chr20:45972282-45972532	chr20	45972282	45972532	[9.92072, 6.51]	235	-	45972172	ZNF335	ENST00000322927.2
H929	3129	chr1	212035285	0	0	PROMOTER	7.40815	chr1:212035160-212035410	chr1	212035160	212035410	[7.40815]	235	-	212035520	INTS7	ENST00000366992.7	251	-	212035536	INTS7	ENST00000366993.7	254	-	212035539	INTS7	ENST00000440600.6	257	-	212035542	INTS7	ENST00000366994.7	268	+	212035553	DTL	ENST00000542077.5	292	+	212035577	DTL	ENST00000366991.4
H929	28301	chr16	79600950	0	1	PROMOTER	10.6812	chr16:79600825-79601075	chr16	79600825	79601075	[4.51, 10.68116]	236	-	79600714	MAF	ENST00000326043.4:ENST00000393350.1	1048	-	79599902	MAF	ENST00000569649.1
H929	22795	chr11	62831804	2	4	PROMOTER	19.4234	chr11:62831679-62831929	chr11	62831679	62831929	[19.42342, 8.44]	237	-	62832041	STX5	ENST00000377897.8	238	-	62832042	STX5	ENST00000394690.5	284	-	62832088	STX5	ENST00000294179.7	430	+	62832234	RP11-727F15.9	ENST00000535817.1	999	-	62832803	RP11-727F15.14	ENST00000636508.1
H929	24310	chr12	166558	0	0	PROMOTER	6.75597	chr12:166433-166683	chr12	166433	166683	[6.75597]	237	-	166321	RP11-598F7.5	ENST00000540136.1
H929	2437	chr1	173867280	3.46	7	PROMOTER	6.24045	chr1:173867155-173867405	chr1	173867155	173867405	[6.24045, 4.73]	237	-	173867043	GAS5	ENST00000448718.5	240	-	173867040	GAS5	ENST00000425771.5	409	-	173867689	GAS5	ENST00000432536.5	449	-	173867729	GAS5	ENST00000451607.5	535	-	173867815	GAS5	ENST00000454068.5	703	-	173867983	GAS5	ENST00000452197.5	707	-	173867987	GAS5	ENST00000450589.5	709	-
H929	15617	chr6	137218791	3.46	7	PROMOTER	5.42563	chr6:137218666-137218916	chr6	137218666	137218916	[5.42563, 3.44]	237	-	137219028	IFNGR1	ENST00000647124.1	273	-	137219064	IFNGR1	ENST00000642390.1	331	-	137219122	IFNGR1	ENST00000645753.1	345	-	137219136	IFNGR1	ENST00000646036.1	369	-	137219160	IFNGR1	ENST00000646898.1	453	-	137219244	IFNGR1	ENST00000644894.1	658	-	137219449	IFNGR1	ENST00000367739.8
H929	30509	chr19	4724101	0	0	PROMOTER	25.19	chr19:4723976-4724226	chr19	4723976	4724226	[20.79631, 25.19]	238	-	4723863	DPP9	ENST00000262960.13	295	-	4723806	DPP9	ENST00000598800.5	351	-	4723750	DPP9	ENST00000597849.5
H929	3473	chr1	231626577	0	0	PROMOTER	5.37039	chr1:231626452-231626702	chr1	231626452	231626702	[5.37039]	238	+	231626815	DISC1	ENST00000539444.5:ENST00000602281.5:ENST00000602873.5:ENST00000366633.7:ENST00000537876.5:ENST00000366636.8:ENST00000628350.2:ENST00000535983.5:ENST00000366637.8:ENST00000620189.3:ENST00000622252.4:ENST00000439617.7:ENST00000317586.8	291	+	231626868	DISC1	ENST00000639374.1
H929	28719	chr17	28854699	8.49	17	PROMOTER	10.0867	chr17:28854574-28854824	chr17	28854574	28854824	[4.77, 10.08673]	239	+	28854938	ERAL1	ENST00000254928.9	291	-	28854990	FAM222B	ENST00000583953.5
H929	2734	chr1	186376109	0	0	PROMOTER	7.21785	chr1:186375984-186376234	chr1	186375984	186376234	[7.21785]	240	+	186375869	ODR4	ENST00000287859.10	271	+	186375838	ODR4	ENST00000419367.8:ENST00000367470.8	784	-	186375325	TPR	ENST00000367478.8:ENST00000613151.1
H929	18574	chr8	73972527	0	0	PROMOTER	5.59729	chr8:73972402-73972652	chr8	73972402	73972652	[5.59729]	240	-	73972287	REL	ENST00000518127.5	280	-	73972247	REL	ENST00000520242.5	295	-	73972232	REL	ENST00000522337.5	341	-	73972186	REL	ENST00000602840.5	357	-	73972170	REL	ENST00000520210.1	421	-	73972106	REL	ENST00000284811.12	619	-	73971908	REL	ENST00000622804.1:ENST00000523815.5	1890	-
H929	28173	chr16	68284077	5	10	PROMOTER	9.28515	chr16:68283952-68284202	chr16	68283952	68284202	[9.28515, 2.4]	241	-	68284318	RNU6-1262P	ENST00000516217.1
H929	13616	chr5	169013506	99.33	216	PROMOTER	27.2017	chr5:169013381-169013631	chr5	169013381	169013631	[5.59278, 27.20169, 13.5]	242	+	169013264	CTB-174D11.1	ENST00000507304.1	258	+	169013248	CTB-174D11.1	ENST00000513790.5	279	+	169013227	CTB-174D11.1	ENST00000509170.1	360	-	169013146	CTB-174D11.3	ENST00000623273.1
H929	2716	chr1	185318022	0	0	PROMOTER	13.8199	chr1:185317897-185318147	chr1	185317897	185318147	[13.81987]	243	+	185317779	GS1-279B7.2	ENST00000609881.1	693	-	185317329	IVNS1ABP	ENST00000367498.7
H929	16944	chr7	107744398	0	0	PROMOTER	8.99467	chr7:107744273-107744523	chr7	107744273	107744523	[8.99467]	243	+	107744155	CBLL1	ENST00000415884.6	256	+	107744142	CBLL1	ENST00000222597.6	270	-	107744128	AC002467.7	ENST00000457510.2	701	+	107743697	CBLL1	ENST00000440859.7
H929	1480	chr1	153671292	2	4	PROMOTER	49.4155	chr1:153671167-153671417	chr1	153671167	153671417	[49.41553, 17.58]	244	-	153671048	ILF2	ENST00000361891.8	264	-	153671028	ILF2	ENST00000615950.4	310	-	153670982	ILF2	ENST00000368681.1
H929	21084	chr10	12068728	0	0	PROMOTER	34.2589	chr10:12068603-12068853	chr10	12068603	12068853	[15.7, 34.25894]	244	+	12068972	DHTKD1	ENST00000263035.8
H929	10174	chr4	165327379	0	0	PROMOTER	17.5895	chr4:165327254-165327504	chr4	165327254	165327504	[17.58953]	244	+	165327623	MSMO1	ENST00000261507.10	307	+	165327686	MSMO1	ENST00000393766.6	342	+	165327721	MSMO1	ENST00000504317.1
H929	20167	chr9	70113615	0	0	PROMOTER	9.22241	chr9:70113490-70113740	chr9	70113490	70113740	[9.22241]	245	-	70113860	RP11-195E11.2	ENST00000414515.7
H929	28727	chr17	28952016	9	18	PROMOTER	7.75616	chr17:28951891-28952141	chr17	28951891	28952141	[2.5, 7.75616]	245	-	28951771	PHF12	ENST00000332830.8	526	-	28951490	PHF12	ENST00000268756.7	709	-	28951307	PHF12	ENST00000577226.5
H929	29571	chr18	13612374	55	110	PROMOTER	5.33	chr18:13612249-13612499	chr18	13612249	13612499	[3.56966, 5.33]	245	+	13612619	LDLRAD4	ENST00000586765.1	610	+	13611764	LDLRAD4	ENST00000585931.5	910	+	13611464	LDLRAD4	ENST00000587757.5	1260	+	13611114	MIR4526	ENST00000583168.1
H929	19543	chr8	123396711	2	4	PROMOTER	57.9413	chr8:123396586-123396836	chr8	123396586	123396836	[40.63, 57.94127]	246	-	123396465	ATAD2	ENST00000287394.9
H929	32440	chr22	41286497	0	0	PROMOTER	7.62223	chr22:41286372-41286622	chr22	41286372	41286622	[7.62223]	246	-	41286251	RANGAP1	ENST00000356244.7	532	-	41285965	RANGAP1	ENST00000405486.5
H929	20271	chr9	81689960	0	0	PROMOTER	11.21	chr9:81689835-81690085	chr9	81689835	81690085	[11.21002]	247	+	81689713	RP11-154D17.1	ENST00000437181.1	655	-	81689305	TLE1	ENST00000376499.7
H929	28170	chr16	67936840	1	2	PROMOTER	10.6812	chr16:67936715-67936965	chr16	67936715	67936965	[5.84, 10.68116]	247	-	67937087	PSMB10	ENST00000358514.8	1199	-	67935641	CTC-479C5.12	ENST00000573493.1
H929	7364	chr3	98522267	0	0	PROMOTER	5.59278	chr3:98522142-98522392	chr3	98522142	98522392	[5.59278]	247	-	98522514	CLDND1	ENST00000503004.5	303	+	98522570	RP11-227H4.5	ENST00000502999.1	487	-	98522754	CLDND1	ENST00000513287.5	620	-	98522887	CLDND1	ENST00000502288.5	638	-	98522905	CLDND1	ENST00000511081.5	655	-	98522922	CLDND1	ENST00000507874.5	692	-	98522959	CLDND1	ENST00000510545.5	718	-
H929	31622	chr20	49278692	1	2	PROMOTER	23.9803	chr20:49278567-49278817	chr20	49278567	49278817	[17.05, 23.98028]	248	+	49278940	SNORD12C	ENST00000386307.1	265	+	49278427	RF02215	ENST00000615787.1	266	-	49278426	ZNFX1	ENST00000371754.8	424	+	49279116	RF02216	ENST00000610973.1	473	-	49278219	ZNFX1	ENST00000396105.5	482	+	49279174	ZFAS1	ENST00000623640.1	514	+	49278178	ZFAS1	ENST00000450535.5	627	-
H929	24784	chr12	56007411	6	12	PROMOTER	11.856	chr12:56007286-56007536	chr12	56007286	56007536	[11.85604, 4.33]	248	+	56007659	IKZF4	ENST00000262032.9
H929	1668	chr1	157691514	0	1	PROMOTER	6.53492	chr1:157691389-157691639	chr1	157691389	157691639	[6.53492, 2.09]	248	+	157691762	RP11-367J7.3	ENST00000453692.1
H929	8029	chr3	149970152	4	8	PROMOTER	25.1	chr3:149970027-149970277	chr3	149970027	149970277	[25.10004, 7.53]	249	-	149970401	PFN2	ENST00000481275.5	563	-	149970715	PFN2	ENST00000481767.5	583	-	149970735	PFN2	ENST00000475518.5	752	-	149970904	PFN2	ENST00000461930.1	770	-	149970922	PFN2	ENST00000423691.2	773	-	149970925	PFN2	ENST00000490975.1	788	-	149970940	PFN2	ENST00000461868.1	798	-
H929	14336	chr6	27891041	0	0	PROMOTER	10.5503	chr6:27890916-27891166	chr6	27890916	27891166	[10.55033]	249	-	27890792	HIST1H3J	ENST00000359303.3
H929	25745	chr13	49628548	11	22	PROMOTER	7.84177	chr13:49628423-49628673	chr13	49628423	49628673	[7.84177, 2.22]	249	+	49628299	ARL11	ENST00000282026.1
H929	30403	chr18	76822856	0	0	PROMOTER	6.25562	chr18:76822731-76822981	chr18	76822731	76822981	[6.25562]	249	+	76822607	ZNF236	ENST00000320610.13	561	-	76822295	RP11-162A12.2	ENST00000585258.1	1304	+	76824160	ZNF236	ENST00000253159.12
H929	17140	chr7	130913560	3	6	PROMOTER	20.6563	chr7:130913435-130913685	chr7	130913435	130913685	[20.65634, 6.15]	250	-	130913310	AC058791.1	ENST00000432045.6
H929	3837	chr2	9422979	0	0	PROMOTER	12.5005	chr2:9422854-9423104	chr2	9422854	9423104	[12.50054]	250	-	9423229	ITGB1BP1	ENST00000360635.7	271	-	9423250	ITGB1BP1	ENST00000359712.7	451	-	9423430	ITGB1BP1	ENST00000456913.6	501	-	9423480	ITGB1BP1	ENST00000488451.5	527	-	9423506	ITGB1BP1	ENST00000238091.8	568	-	9423547	ITGB1BP1	ENST00000355346.8	589	+	9423568	CPSF3	ENST00000238112.7	905	+
H929	12102	chr5	93581547	3.46	7	PROMOTER	8.25185	chr5:93581422-93581672	chr5	93581422	93581672	[8.25185, 6.34]	250	-	93581297	RP11-65F13.2	ENST00000504474.5	328	-	93581219	RP11-65F13.2	ENST00000606233.5	1677	+	93583224	NR2F1	ENST00000644230.1	1790	+	93583337	NR2F1	ENST00000327111.7
H929	10975	chr5	29390190	2.45	5	PROMOTER	7.74077	chr5:29390065-29390315	chr5	29390065	29390315	[2.36, 7.74077]	250	-	29389940	CTD-2010I22.2	ENST00000507876.1
H929	6501	chr3	9731479	0	0	PROMOTER	5.10526	chr3:9731354-9731604	chr3	9731354	9731604	[5.10526]	250	+	9731729	BRPF1	ENST00000433861.6	266	+	9731745	BRPF1	ENST00000424362.5:ENST00000383829.6
H929	27535	chr15	92882456	5	10	PROMOTER	42.095	chr15:92882331-92882581	chr15	92882331	92882581	[42.09502, 27.33]	251	+	92882707	AC013394.2	ENST00000557682.6	276	+	92882732	AC013394.2	ENST00000553829.1	406	+	92882862	AC013394.2	ENST00000556895.5	418	+	92882874	AC013394.2	ENST00000554669.6	432	+	92882888	AC013394.2	ENST00000554894.5	559	+	92883015	AC013394.2	ENST00000557147.1	957	+	92883413	RP11-437B10.1	ENST00000629685.2
H929	30887	chr19	41310441	2	4	PROMOTER	7.55898	chr19:41310316-41310566	chr19	41310316	41310566	[4.38, 7.55898]	252	+	41310189	CCDC97	ENST00000269967.3
H929	19568	chr8	124579378	0	0	PROMOTER	6.75547	chr8:124579253-124579503	chr8	124579253	124579503	[6.75547]	253	+	124579631	RP11-532M24.1	ENST00000606244.1
H929	11373	chr5	55159865	3.46	7	PROMOTER	6.19596	chr5:55159740-55159990	chr5	55159740	55159990	[6.19596, 1.81]	253	+	55160118	GPX8	ENST00000503787.5	304	+	55160169	GPX8	ENST00000296734.6	305	+	55160170	GPX8	ENST00000515370.1
H929	19050	chr8	100430922	3	6	PROMOTER	17.0558	chr8:100430797-100431047	chr8	100430797	100431047	[12.1, 17.05583]	254	-	100430668	KB-173C10.1	ENST00000523554.1
H929	3602	chr1	241847926	11.49	23	PROMOTER	9.45256	chr1:241847801-241848051	chr1	241847801	241848051	[9.45256, 5.98]	254	+	241848180	EXO1	ENST00000366548.7	805	+	241848731	EXO1	ENST00000348581.9	905	+	241848831	EXO1	ENST00000518483.5
H929	4107	chr2	31217799	0	0	PROMOTER	6.76075	chr2:31217674-31217924	chr2	31217674	31217924	[6.76075]	254	-	31217545	CAPN14	ENST00000403897.3
H929	18747	chr8	85245972	49.27	110	PROMOTER	24.6299	chr8:85245847-85246097	chr8	85245847	85246097	[17.61, 24.62988, 5.33]	255	-	85245717	RP11-219B4.5	ENST00000549291.1	445	+	85245527	CA13	ENST00000321764.3
H929	3260	chr1	218510351	2	4	PROMOTER	16.5875	chr1:218510226-218510476	chr1	218510226	218510476	[16.58752, 2.0]	255	+	218510096	C1orf143	ENST00000443836.5
H929	13006	chr5	140346886	0	0	PROMOTER	5.638	chr5:140346761-140347011	chr5	140346761	140347011	[5.638]	255	-	140346631	HBEGF	ENST00000230990.6
H929	8514	chr3	194131457	7	14	PROMOTER	11.2193	chr3:194131332-194131582	chr3	194131332	194131582	[8.14, 11.21926]	256	-	194131201	RP11-135A1.2	ENST00000418353.1
H929	11973	chr5	88675962	0	0	PROMOTER	8.91934	chr5:88675837-88676087	chr5	88675837	88676087	[8.91934]	256	+	88676218	CTC-467M3.1	ENST00000510274.1	336	-	88676298	LINC00461	ENST00000504246.5
H929	22808	chr11	63768385	0	0	PROMOTER	5.26866	chr11:63768260-63768510	chr11	63768260	63768510	[5.26866]	256	-	63768641	C11orf95	ENST00000546282.3	390	-	63768775	C11orf95	ENST00000433688.2
H929	14421	chr6	30718145	0	0	PROMOTER	5.20251	chr6:30718020-30718270	chr6	30718020	30718270	[5.20251]	256	-	30717889	MDC1	ENST00000376406.7	1070	-	30717075	MDC1	ENST00000613547.4
H929	21884	chr10	100536115	14	28	PROMOTER	5.00266	chr10:100535990-100536240	chr10	100535990	100536240	[5.00266, 2.82]	256	+	100535859	HIF1AN	ENST00000299163.6
H929	25423	chr12	118037612	3.46	7	PROMOTER	13.2967	chr12:118037487-118037737	chr12	118037487	118037737	[13.29674, 5.97]	257	+	118037869	RP11-33N14.5	ENST00000621854.1
H929	32189	chr22	22322215	0	0	PROMOTER	9.58469	chr22:22322090-22322340	chr22	22322090	22322340	[9.58469]	257	+	22322472	IGLV1-51	ENST00000390290.3
H929	12463	chr5	112160783	0	0	PROMOTER	7.97	chr5:112160658-112160908	chr5	112160658	112160908	[7.97]	257	+	112160526	EPB41L4A-AS1	ENST00000413221.6	702	+	112161485	SNORA13	ENST00000458790.1
H929	25189	chr12	101038837	2	4	PROMOTER	7.97	chr12:101038712-101038962	chr12	101038712	101038962	[1.46, 7.97]	257	-	101039094	RP11-350G24.1	ENST00000549036.1
H929	3546	chr1	236795023	0	1	PROMOTER	21.1458	chr1:236794898-236795148	chr1	236794898	236795148	[7.34, 21.14576]	258	+	236795281	MTR	ENST00000535889.5	287	+	236795310	MTR	ENST00000366577.9
H929	26075	chr14	49586838	0	0	PROMOTER	7.37341	chr14:49586713-49586963	chr14	49586713	49586963	[7.37341]	258	+	49586580	RN7SL1	ENST00000618786.1	259	+	49586579	RN7SL1	ENST00000635274.1	462	-	49586376	RPS29	ENST00000396020.7:ENST00000245458.10:ENST00000554075.2
H929	3187	chr1	214602937	0	0	PROMOTER	7.18052	chr1:214602812-214603062	chr1	214602812	214603062	[7.18052]	258	+	214603195	CENPF	ENST00000366955.7
H929	10194	chr4	168480773	0	0	PROMOTER	6.17465	chr4:168480648-168480898	chr4	168480648	168480898	[6.17465]	259	-	168480514	DDX60L	ENST00000511577.5	286	-	168480487	DDX60L	ENST00000260184.11:ENST00000505890.5
H929	32206	chr22	23138124	7	14	PROMOTER	12.6024	chr22:23137999-23138249	chr22	23137999	23138249	[12.60242, 1.89]	260	-	23137864	RF00066	ENST00000459276.2
H929	32040	chr21	34615403	0	0	PROMOTER	11.1131	chr21:34615278-34615528	chr21	34615278	34615528	[11.11314]	261	-	34615142	RCAN1	ENST00000313806.8	957	-	34614446	RCAN1	ENST00000443408.6	1560	-	34613843	RCAN1	ENST00000399272.5
H929	6499	chr3	9396393	2.45	5	PROMOTER	6.95283	chr3:9396268-9396518	chr3	9396268	9396518	[6.95283, 3.78]	261	-	9396654	RP11-58B17.1	ENST00000468186.5	1035	-	9397428	RP11-58B17.1	ENST00000521609.5	1081	-	9397474	RP11-58B17.1	ENST00000481221.6	1102	-	9397495	RP11-58B17.1	ENST00000520447.1	1326	+	9397719	SETD5	ENST00000402198.5	1511	+	9397904	SETD5	ENST00000406341.5
H929	16819	chr7	100148646	0	0	PROMOTER	6.03802	chr7:100148521-100148771	chr7	100148521	100148771	[6.03802]	261	+	100148907	LAMTOR4	ENST00000341942.9	266	+	100148912	LAMTOR4	ENST00000474141.5	267	+	100148913	LAMTOR4	ENST00000460732.5	292	+	100148938	LAMTOR4	ENST00000441173.1	332	+	100148978	LAMTOR4	ENST00000468582.5	348	+	100148994	LAMTOR4	ENST00000488241.5	711	+	100149357	LAMTOR4	ENST00000473459.5
H929	22885	chr11	67121006	0	1	PROMOTER	18.424	chr11:67120881-67121131	chr11	67120881	67121131	[4.39, 18.424]	263	+	67121269	KDM2A	ENST00000308783.9	1319	+	67119687	KDM2A	ENST00000529006.6	1737	+	67119269	KDM2A	ENST00000398645.6
H929	13241	chr5	150905246	0	0	PROMOTER	5.68548	chr5:150905121-150905371	chr5	150905121	150905371	[5.68548]	263	-	150904983	ZNF300	ENST00000274599.9:ENST00000418587.6:ENST00000446148.6	268	-	150904978	ZNF300	ENST00000394226.2	457	-	150904789	ZNF300	ENST00000427179.5
H929	28844	chr17	39200019	0	0	PROMOTER	6.58782	chr17:39199894-39200144	chr17	39199894	39200144	[6.58782]	264	+	39200283	RPL19	ENST00000225430.8	297	+	39200316	RPL19	ENST00000579374.5	323	+	39200342	RPL19	ENST00000579260.5	326	+	39200345	RPL19	ENST00000582193.5
H929	2943	chr1	205122280	3.46	7	PROMOTER	31.958	chr1:205122155-205122405	chr1	205122155	205122405	[17.12, 31.95798]	265	-	205122015	RBBP5	ENST00000264515.10:ENST00000367164.1
H929	1078	chr1	115099407	3	6	PROMOTER	12.2348	chr1:115099282-115099532	chr1	115099282	115099532	[12.23482, 1.39]	265	+	115099672	RP4-666F24.3	ENST00000448680.1
H929	27155	chr15	63048174	1.41	3	PROMOTER	6.16179	chr15:63048049-63048299	chr15	63048049	63048299	[2.8, 6.16179]	265	+	63048439	TPM1	ENST00000334895.10	297	+	63048471	TPM1	ENST00000404484.9	313	+	63048487	TPM1	ENST00000558910.3	315	+	63048489	TPM1	ENST00000317516.12	388	+	63048562	TPM1	ENST00000560959.5	402	+	63048576	TPM1	ENST00000559281.6	1074	-	63049248	RP11-244F12.3	ENST00000560903.1	1213	-
H929	32551	chrM	14406	0	0	PROMOTER	47.705	chrM:14281-14531	chrM	14281	14531	[47.70499]	267	-	14673	MT-ND6	ENST00000361681.2	336	-	14742	MT-TE	ENST00000387459.1	341	+	14747	MT-CYB	ENST00000361789.2	1482	+	15888	MT-TT	ENST00000387460.2	1617	-	16023	MT-TP	ENST00000387461.2
H929	16882	chr7	105012757	1.41	3	PROMOTER	8.24	chr7:105012632-105012882	chr7	105012632	105012882	[8.24, 1.5613]	267	-	105013024	RP11-325F22.3	ENST00000445184.1	287	-	105013044	RP11-325F22.3	ENST00000450686.1	1422	+	105014179	KMT2E	ENST00000311117.7	1433	+	105014190	KMT2E	ENST00000257745.8	1461	+	105014218	KMT2E	ENST00000476671.5	1564	-	105014321	RP11-325F22.4	ENST00000453677.1
H929	30102	chr18	59899680	1	2	PROMOTER	7.0698	chr18:59899555-59899805	chr18	59899555	59899805	[7.0698, 5.86]	268	+	59899948	PMAIP1	ENST00000316660.6	336	+	59900016	PMAIP1	ENST00000269518.9
H929	29006	chr17	50696376	3.46	7	PROMOTER	6.75547	chr17:50696251-50696501	chr17	50696251	50696501	[1.14, 6.75547]	268	+	50696644	RF00019	ENST00000364470.1
H929	19542	chr8	123275273	0	0	PROMOTER	6.227	chr8:123275148-123275398	chr8	123275148	123275398	[6.227]	268	-	123275541	ZHX1	ENST00000522655.5	778	-	123274495	ZHX1	ENST00000395571.7	786	-	123274487	ZHX1	ENST00000297857.3
H929	24575	chr12	31959151	0	0	PROMOTER	5.59278	chr12:31959026-31959276	chr12	31959026	31959276	[5.59278]	268	+	31959419	KIAA1551	ENST00000312561.8
H929	4046	chr2	26345817	0	0	PROMOTER	12.7513	chr2:26345692-26345942	chr2	26345692	26345942	[12.75132]	269	+	26346086	SELENOI	ENST00000613142.4	297	+	26346114	SELENOI	ENST00000260585.11	1000	-	26346817	ADGRF3	ENST00000333478.10
H929	22791	chr11	62709783	4.47	9	PROMOTER	6.75547	chr11:62709658-62709908	chr11	62709658	62709908	[4.46, 6.75547]	269	-	62709514	BSCL2	ENST00000405837.5
H929	11089	chr5	35089906	1	2	PROMOTER	6.08413	chr5:35089781-35090031	chr5	35089781	35090031	[6.08413, 1.59]	269	-	35089637	PRLR	ENST00000231423.7:ENST00000513753.5:ENST00000348262.7	286	-	35089620	PRLR	ENST00000310101.9:ENST00000511486.5
H929	3705	chr1_KI270713v1_random	21754	6.48	13	PROMOTER	27.5405	chr1_KI270713v1_random:21629-21879	chr1_KI270713v1_random	21629	21879	[15.39, 27.54052]	270	-	22024	RF00003	ENST00000619109.1
H929	2657	chr1	183472017	2	4	PROMOTER	31.1806	chr1:183471892-183472142	chr1	183471892	183472142	[31.18059, 11.57]	271	-	183471746	RP11-74N20.1	ENST00000421703.5	288	-	183471729	RP11-74N20.1	ENST00000432837.1	461	+	183472478	SMG7	ENST00000367537.7	483	+	183472500	SMG7	ENST00000508461.5	485	+	183472502	SMG7	ENST00000347615.6	486	+	183472503	SMG7	ENST00000507469.5	510	+	183472527	SMG7	ENST00000515829.6	604	+
H929	29142	chr17	63622143	5.48	11	PROMOTER	8.13668	chr17:63622018-63622268	chr17	63622018	63622268	[8.13668, 4.61]	272	+	63622415	MAP3K3	ENST00000579585.5	282	+	63622425	MAP3K3	ENST00000584573.5	297	+	63622440	MAP3K3	ENST00000361733.7	299	+	63622442	MAP3K3	ENST00000361357.7	567	+	63622710	MAP3K3	ENST00000577395.5
H929	3317	chr1	221741903	0	0	PROMOTER	7.99629	chr1:221741778-221742028	chr1	221741778	221742028	[7.99629]	273	-	221742176	DUSP10	ENST00000366899.3
H929	9276	chr4	77076278	0	0	PROMOTER	6.84445	chr4:77076153-77076403	chr4	77076153	77076403	[6.84445]	273	-	77076005	CCNI	ENST00000237654.8
H929	13143	chr5	146447038	0	1	PROMOTER	8.13668	chr5:146446913-146447163	chr5	146446913	146447163	[2.21, 8.13668]	274	+	146447312	TCERG1	ENST00000296702.9	294	+	146447332	TCERG1	ENST00000394421.6
H929	28862	chr17	39926567	3.46	7	PROMOTER	5.52972	chr17:39926442-39926692	chr17	39926442	39926692	[5.52972, 1.38]	274	-	39926841	ORMDL3	ENST00000394169.5	1034	-	39927601	ORMDL3	ENST00000304046.6:ENST00000579695.5	1175	+	39927742	RP11-387H17.4	ENST00000578802.1	1300	+	39927867	RP11-387H17.4	ENST00000582263.1
H929	847	chr1	77978812	0	0	PROMOTER	5.49033	chr1:77978687-77978937	chr1	77978687	77978937	[5.49033]	274	-	77979086	FUBP1	ENST00000370768.6	280	-	77979092	FUBP1	ENST00000370767.5
H929	13208	chr5	149550024	7	14	PROMOTER	25.2029	chr5:149549899-149550149	chr5	149549899	149550149	[25.20285, 6.11]	275	-	149550299	CSNK1A1	ENST00000504676.5:ENST00000515435.5	940	-	149550964	CSNK1A1	ENST00000515768.5	1144	-	149551168	CSNK1A1	ENST00000515748.2	1373	-	149551397	CSNK1A1	ENST00000261798.9	1528	-	149551552	CSNK1A1	ENST00000377843.6
H929	25447	chr12	120292962	0	0	PROMOTER	18.6177	chr12:120292837-120293087	chr12	120292837	120293087	[18.61765]	275	-	120293237	RNU4-1	ENST00000363925.1	1059	-	120291903	RNU4-2	ENST00000365668.1
H929	14449	chr6	31827460	4	8	PROMOTER	17.7607	chr6:31827335-31827585	chr6	31827335	31827585	[9.51, 17.76073]	275	+	31827735	HSPA1B	ENST00000375650.4
H929	13408	chr5	158175121	0	0	PROMOTER	11.995	chr5:158174996-158175246	chr5	158174996	158175246	[11.99498]	275	+	158175396	CTC-436K13.1	ENST00000522975.1	1301	-	158176422	CTC-436K13.5	ENST00000522769.1
H929	20964	chr10	4514677	0	0	PROMOTER	11.2193	chr10:4514552-4514802	chr10	4514552	4514802	[3.26, 11.21926]	275	+	4514952	RNU6-163P	ENST00000384396.1
H929	20768	chr9	123268852	62.7	133	PROMOTER	183.43	chr9:123268727-123268977	chr9	123268727	123268977	[95.22, 134.1707, 183.43]	276	-	123268576	STRBP	ENST00000360998.3	288	-	123268564	STRBP	ENST00000348403.9
H929	127	chr1	11909651	4	8	PROMOTER	20.6563	chr1:11909526-11909776	chr1	11909526	11909776	[10.07, 20.65634]	276	-	11909927	RNU5E-4P	ENST00000364931.1	1499	+	11908152	RNU5E-1	ENST00000362477.1
H929	32710	chrX	20142120	3.46	7	PROMOTER	11.6488	chrX:20141995-20142245	chrX	20141995	20142245	[4.07, 11.64881]	276	-	20141844	EIF1AX	ENST00000379607.9	294	-	20141826	EIF1AX	ENST00000379593.1
H929	3081	chr1	210374543	0	0	PROMOTER	11.4461	chr1:210374418-210374668	chr1	210374418	210374668	[11.44612]	276	-	210374267	RNU5A-8P	ENST00000364102.1
H929	8303	chr3	173920520	1.41	3	PROMOTER	7.97	chr3:173920395-173920645	chr3	173920395	173920645	[7.97, 2.22]	276	-	173920796	RP11-639B4.1	ENST00000423873.5
H929	29462	chr18	5237808	1	2	PROMOTER	7.40815	chr18:5237683-5237933	chr18	5237683	5237933	[7.40815, 7.12]	276	+	5238084	RP11-835E18.2	ENST00000582363.1	292	+	5238100	RP11-835E18.2	ENST00000582008.5	718	-	5238526	RP11-835E18.5	ENST00000579933.1	790	-	5238598	LINC00526	ENST00000581067.1
H929	23821	chr11	117327579	4	8	PROMOTER	6.72539	chr11:117327454-117327704	chr11	117327454	117327704	[6.72539, 1.32]	276	+	117327855	CEP164	ENST00000278935.7	459	-	117328038	AP000892.4	ENST00000504906.1
H929	11121	chr5	36606632	2	4	PROMOTER	9.82817	chr5:36606507-36606757	chr5	36606507	36606757	[3.21, 9.82817]	277	+	36606355	SLC1A3	ENST00000612708.4:ENST00000613445.4:ENST00000265113.8	1697	+	36608329	SLC1A3	ENST00000381918.3
H929	32075	chr21	36079111	0	0	PROMOTER	6.03541	chr21:36078986-36079236	chr21	36078986	36079236	[6.03541]	278	-	36079389	SETD4	ENST00000399201.5
H929	21256	chr10	25113337	0	0	PROMOTER	5.59278	chr10:25113212-25113462	chr10	25113212	25113462	[5.59278]	279	+	25113058	RP11-80K21.3	ENST00000436140.2
H929	11739	chr5	75717118	3.46	7	PROMOTER	18.4016	chr5:75716993-75717243	chr5	75716993	75717243	[18.40157, 12.17]	280	-	75717398	POC5	ENST00000514838.6	363	-	75717481	POC5	ENST00000428202.6
H929	24715	chr12	50924471	0	0	PROMOTER	11.5208	chr12:50924346-50924596	chr12	50924346	50924596	[3.54, 11.52081]	280	+	50924751	METTL7A	ENST00000332160.4	999	+	50923472	METTL7A	ENST00000548553.1
H929	5864	chr2	201258372	4.47	9	PROMOTER	22.4026	chr2:201258247-201258497	chr2	201258247	201258497	[22.4026, 16.57]	281	+	201258091	CASP8	ENST00000392266.7	336	+	201258036	CASP8	ENST00000358485.8
H929	6111	chr2	219598141	2	4	PROMOTER	8.25808	chr2:219598016-219598266	chr2	219598016	219598266	[3.27, 8.25808]	281	+	219597860	STK11IP	ENST00000456909.5
H929	28570	chr17	8209943	0	0	PROMOTER	7.49674	chr17:8209818-8210068	chr17	8209818	8210068	[7.49674]	281	-	8210224	AURKB	ENST00000578549.5	638	-	8210581	AURKB	ENST00000534871.5	639	-	8210582	AURKB	ENST00000316199.10	655	-	8210598	AURKB	ENST00000585124.5
H929	20738	chr9	120793131	0	0	PROMOTER	6.91	chr9:120793006-120793256	chr9	120793006	120793256	[6.91]	281	-	120793412	FBXW2	ENST00000608872.5	728	+	120792403	RP11-27I1.4	ENST00000464488.3
H929	5325	chr2	157876421	0	0	PROMOTER	5.638	chr2:157876296-157876546	chr2	157876296	157876546	[5.638]	281	+	157876702	UPP2	ENST00000605860.5	559	-	157875862	ACVR1	ENST00000434821.5	1262	+	157877683	RP11-546J1.1	ENST00000604340.1	1310	-	157875111	ACVR1	ENST00000263640.7
H929	27881	chr16	21951426	0	0	PROMOTER	5.78197	chr16:21951301-21951551	chr16	21951301	21951551	[5.78197]	282	-	21951708	CTD-2649C14.2	ENST00000616774.1	1234	+	21952660	UQCRC2	ENST00000268379.8	1862	+	21953288	UQCRC2	ENST00000630839.2	1945	+	21953371	UQCRC2	ENST00000561553.5
H929	30924	chr19	42325326	0	0	PROMOTER	5.42563	chr19:42325201-42325451	chr19	42325201	42325451	[5.42563]	283	+	42325609	MEGF8	ENST00000334370.8:ENST00000378073.5	918	+	42326244	MEGF8	ENST00000251268.10
H929	11522	chr5	62305877	0	0	PROMOTER	7.40815	chr5:62305752-62306002	chr5	62305752	62306002	[7.40815]	285	+	62306162	KIF2A	ENST00000401507.7	374	+	62306251	KIF2A	ENST00000381103.6	575	+	62306452	KIF2A	ENST00000407818.7
H929	6847	chr3	40971864	0	0	PROMOTER	10.3912	chr3:40971739-40971989	chr3	40971739	40971989	[10.3912]	286	-	40971578	RP11-520A21.1	ENST00000453828.1
H929	18405	chr8	66113000	4.47	9	PROMOTER	12.7219	chr8:66112875-66113125	chr8	66112875	66113125	[12.72193, 8.02]	287	+	66113287	AC084082.3	ENST00000517961.3
H929	24356	chr12	3041724	10	20	PROMOTER	6.86992	chr12:3041599-3041849	chr12	3041599	3041849	[5.93, 6.86992]	287	+	3041437	RP11-253E3.3	ENST00000513358.3
H929	15103	chr6	96785424	0	0	PROMOTER	5.59729	chr6:96785299-96785549	chr6	96785299	96785549	[5.59729]	287	+	96785137	RP3-417O22.3	ENST00000442184.1
H929	24907	chr12	68807888	2.45	5	PROMOTER	99.7976	chr12:68807763-68808013	chr12	68807763	68808013	[99.79758, 85.65]	288	+	68808176	MDM2	ENST00000258149.9	303	+	68808191	MDM2	ENST00000428863.6:ENST00000393412.7	576	+	68808464	MDM2	ENST00000258148.11	1114	+	68809002	MDM2	ENST00000539479.6	1324	+	68809212	MDM2	ENST00000544561.5:ENST00000299252.8:ENST00000350057.9:ENST00000360430.6:ENST00000393410.5:ENST00000393413.7:ENST00000517852.5:ENST00000545204.1	1339	+	68809227	MDM2	ENST00000348801.6:ENST00000478070.1
H929	23963	chr11	122726599	3.46	7	PROMOTER	19.8202	chr11:122726474-122726724	chr11	122726474	122726724	[8.55, 19.82019]	288	-	122726311	RF01210	ENST00000458998.1
H929	9704	chr4	119300632	0	0	PROMOTER	10.7161	chr4:119300507-119300757	chr4	119300507	119300757	[10.71606]	289	-	119300921	C4orf3	ENST00000504110.1
H929	183	chr1	16896270	0	0	PROMOTER	21.2518	chr1:16896145-16896395	chr1	16896145	16896395	[7.18, 21.2518]	290	+	16895980	RNU1-2	ENST00000384278.1
H929	32108	chr21	41420224	0	0	PROMOTER	6.08413	chr21:41420099-41420349	chr21	41420099	41420349	[6.08413]	291	+	41420515	MX1	ENST00000398600.6
H929	29371	chr17	78782589	0	0	PROMOTER	13.4469	chr17:78782464-78782714	chr17	78782464	78782714	[13.44687]	292	-	78782297	CYTH1	ENST00000589296.5	295	-	78782294	CYTH1	ENST00000361101.8:ENST00000446868.7	317	-	78782272	CYTH1	ENST00000591455.5
H929	13224	chr5	150339599	3	6	PROMOTER	12.3044	chr5:150339474-150339724	chr5	150339474	150339724	[12.30445, 9.6]	292	-	150339307	ARSI	ENST00000515301.2
H929	1294	chr1	148038623	0	0	PROMOTER	19.75	chr1:148038498-148038748	chr1	148038498	148038748	[19.75]	293	-	148038916	RNVU1-7	ENST00000383858.1
H929	5728	chr2	191678825	3	6	PROMOTER	10.3912	chr2:191678700-191678950	chr2	191678700	191678950	[9.84, 10.3912]	293	+	191678532	NABP1	ENST00000425611.6	621	+	191678204	NABP1	ENST00000409510.5	689	+	191678136	NABP1	ENST00000410026.6
H929	32543	chrM	7879	0	0	PROMOTER	8.76685	chrM:7754-8004	chrM	7754	8004	[8.76685]	293	+	7586	MTCO2P12	ENST00000361739.1	361	+	7518	MT-TD	ENST00000387419.1	365	-	7514	MT-TS1	ENST00000387416.2	416	+	8295	MT-TK	ENST00000387421.1	487	+	8366	MT-ATP8	ENST00000361851.1	648	+	8527	MT-ATP6	ENST00000361899.2	1328	+	9207	MT-CO3	ENST00000362079.2	1975	+
H929	14420	chr6	30717596	4.47	9	PROMOTER	5.54	chr6:30717471-30717721	chr6	30717471	30717721	[5.54, 4.49686]	293	-	30717889	MDC1	ENST00000376406.7	521	-	30717075	MDC1	ENST00000613547.4
H929	9197	chr4	70734728	19	38	PROMOTER	13.1905	chr4:70734603-70734853	chr4	70734603	70734853	[13.19048, 6.28]	294	+	70734434	RUFY3	ENST00000502653.5
H929	16895	chr7	105304572	2.45	5	PROMOTER	11.3729	chr7:105304447-105304697	chr7	105304447	105304697	[3.11, 11.37291]	295	+	105304277	RP4-778K6.3	ENST00000476569.1
H929	121	chr1	11262803	0	1	PROMOTER	17.6334	chr1:11262678-11262928	chr1	11262678	11262928	[17.63341, 10.58]	296	-	11262507	MTOR	ENST00000361445.8
H929	11957	chr5	87412046	0	0	PROMOTER	7.76414	chr5:87411921-87412171	chr5	87411921	87412171	[7.76414]	296	+	87412342	CTC-428H11.2	ENST00000644559.1	752	-	87411294	CCNH	ENST00000508855.5	858	-	87412904	CCNH	ENST00000504878.1	973	-	87413019	CCNH	ENST00000256897.8
H929	14223	chr6	26045707	107.75	232	PROMOTER	7.33822	chr6:26045582-26045832	chr6	26045582	26045832	[4.76495, 2.31, 7.33822]	296	+	26045411	HIST1H3C	ENST00000612966.1
H929	10368	chr4	184472312	0	0	PROMOTER	8.00424	chr4:184472187-184472437	chr4	184472187	184472437	[8.00424]	297	-	184472609	RP11-326I11.5	ENST00000605082.1
H929	2381	chr1	172907197	0	0	PROMOTER	5.34677	chr1:172907072-172907322	chr1	172907072	172907322	[5.34677]	297	+	172906900	RP3-471M13.2	ENST00000452366.1
H929	29442	chr18	3093270	0	0	PROMOTER	7.14927	chr18:3093145-3093395	chr18	3093145	3093395	[7.14927]	298	+	3093568	RNU7-25P	ENST00000516544.1
H929	30667	chr19	13151676	0	0	PROMOTER	9.22241	chr19:13151551-13151801	chr19	13151551	13151801	[9.22241]	299	+	13151975	IER2	ENST00000588173.1	1243	+	13150433	IER2	ENST00000292433.3	1261	+	13150415	IER2	ENST00000587885.1	1330	-	13150346	STX10	ENST00000343587.9	1438	-	13150238	STX10	ENST00000587230.5	1450	-	13150226	STX10	ENST00000589083.5	1498	-	13150178	STX10	ENST00000242770.9
H929	29423	chr18	650529	4	8	PROMOTER	36.4185	chr18:650404-650654	chr18	650404	650654	[16.42, 36.41848]	300	+	650229	RP11-806L2.2	ENST00000585150.1
H929	15776	chr6	149560852	0	1	PROMOTER	8.10279	chr6:149560727-149560977	chr6	149560727	149560977	[8.10279, 1.05]	300	+	149561152	RP1-12G14.5	ENST00000446392.1
H929	1607	chr1	156677697	0	0	PROMOTER	5.53868	chr1:156677572-156677822	chr1	156677572	156677822	[5.53868]	300	-	156677397	NES	ENST00000368223.3
H929	30516	chr19	4968812	0	1	PROMOTER	86.762	chr19:4968687-4968937	chr19	4968687	4968937	[86.76204, 79.38]	301	+	4969113	KDM4B	ENST00000611640.4	309	+	4969121	KDM4B	ENST00000159111.8	320	+	4969132	KDM4B	ENST00000381759.8
H929	9363	chr4	83455522	0	0	PROMOTER	7.14383	chr4:83455397-83455647	chr4	83455397	83455647	[7.14383]	301	-	83455823	HELQ	ENST00000510985.1	334	-	83455856	HELQ	ENST00000295488.7	443	+	83455965	MRPS18C	ENST00000295491.8	461	+	83455983	MRPS18C	ENST00000507019.5	533	+	83456055	MRPS18C	ENST00000507349.5
H929	7457	chr3	101827692	0	0	PROMOTER	5.06748	chr3:101827567-101827817	chr3	101827567	101827817	[5.06748]	301	+	101827993	NFKBIZ	ENST00000394054.6
H929	28659	chr17	18183380	0	0	PROMOTER	8.55564	chr17:18183255-18183505	chr17	18183255	18183505	[8.55564]	302	+	18183078	ALKBH5	ENST00000541285.1	859	+	18184239	ALKBH5	ENST00000399138.4	1287	-	18184667	RP11-258F1.1	ENST00000577847.1	1373	-	18184753	RP11-258F1.1	ENST00000583062.1
H929	1702	chr1	158290088	0	0	PROMOTER	6.44607	chr1:158289963-158290213	chr1	158289963	158290213	[6.44607]	302	+	158289786	CD1C	ENST00000368170.7
H929	13536	chr5	163505917	0	0	PROMOTER	7.6212	chr5:163505792-163506042	chr5	163505792	163506042	[7.6212]	303	+	163505614	MAT2B	ENST00000518095.5	369	+	163505548	MAT2B	ENST00000321757.10
H929	177	chr1	16513981	3.46	7	PROMOTER	9.22244	chr1:16513856-16514106	chr1	16513856	16514106	[9.22244, 3.47]	304	-	16514285	RNU1-1	ENST00000383925.1	664	+	16514645	RP4-798A10.7	ENST00000562878.1
H929	24957	chr12	75330360	8	16	PROMOTER	8.19444	chr12:75330235-75330485	chr12	75330235	75330485	[8.19444, 5.52]	304	-	75330056	CAPS2	ENST00000409445.7	335	-	75330025	CAPS2	ENST00000409799.5
H929	20504	chr9	99820193	0	0	PROMOTER	5.27474	chr9:99820068-99820318	chr9	99820068	99820318	[5.27474]	304	-	99819889	RP11-554F20.1	ENST00000427039.1	1662	+	99821855	NR4A3	ENST00000338488.8:ENST00000395097.6:ENST00000618101.4
H929	1378	chr1	150697329	0	0	PROMOTER	7.6212	chr1:150697204-150697454	chr1	150697204	150697454	[7.6212]	305	-	150697024	GOLPH3L	ENST00000271732.7
H929	28217	chr16	71808798	10.49	21	PROMOTER	5.17678	chr16:71808673-71808923	chr16	71808673	71808923	[4.66, 5.17678]	305	-	71809103	AP1G1	ENST00000569748.5	403	-	71809201	AP1G1	ENST00000299980.8:ENST00000393512.7
H929	8370	chr3	180036463	6.48	13	PROMOTER	12.8219	chr3:180036338-180036588	chr3	180036338	180036588	[10.71, 12.82191]	307	-	180036770	PEX5L	ENST00000263962.12	463	-	180036926	PEX5L	ENST00000465751.5	467	-	180036930	PEX5L	ENST00000467460.5	496	-	180036959	PEX5L	ENST00000472994.5	590	-	180037053	PEX5L	ENST00000485199.5
H929	14410	chr6	30556579	12.49	25	PROMOTER	10.9754	chr6:30556454-30556704	chr6	30556454	30556704	[10.97536, 2.46]	307	+	30556886	PRR3	ENST00000376560.7	595	-	30557174	GNL1	ENST00000376621.7	701	+	30557280	PRR3	ENST00000376557.3
H929	13772	chr5	175871885	0	0	PROMOTER	8.25808	chr5:175871760-175872010	chr5	175871760	175872010	[8.25808]	307	+	175871578	CPLX2	ENST00000512824.5	387	+	175871498	CPLX2	ENST00000393745.7
H929	28854	chr17	39777918	0	0	PROMOTER	5.06748	chr17:39777793-39778043	chr17	39777793	39778043	[5.06748]	307	-	39778225	IKZF3	ENST00000583368.1
H929	570	chr1	44819689	1.41	3	PROMOTER	12.49	chr1:44819564-44819814	chr1	44819564	44819814	[12.39242, 12.49]	308	-	44819997	RNU5E-6P	ENST00000365574.1
H929	28666	chr17	19112328	7	14	PROMOTER	10.5701	chr17:19112203-19112453	chr17	19112203	19112453	[2.82, 10.57006]	308	-	19112636	RP11-160E2.6	ENST00000573866.2	308	-	19112636	SNORD3D	ENST00000619178.1:ENST00000630092.1
H929	32542	chrM	7205	0	0	PROMOTER	34.6758	chrM:7080-7330	chrM	7080	7330	[34.67582]	309	-	7514	MT-TS1	ENST00000387416.2	313	+	7518	MT-TD	ENST00000387419.1	381	+	7586	MTCO2P12	ENST00000361739.1	1090	+	8295	MT-TK	ENST00000387421.1	1161	+	8366	MT-ATP8	ENST00000361851.1	1301	+	5904	MT-CO1	ENST00000361624.2	1314	-	5891	MT-TY	ENST00000387409.1	1322	+
H929	29354	chr17	77441800	4.47	9	PROMOTER	10.5109	chr17:77441675-77441925	chr17	77441675	77441925	[10.51092, 5.8]	309	+	77442109	RF00019	ENST00000363781.1
H929	21021	chr10	7472252	2.45	5	PROMOTER	19.577	chr10:7472127-7472377	chr10	7472127	7472377	[3.58, 19.57695]	310	-	7471942	RP5-1031D4.2	ENST00000420395.1
H929	1066	chr1	114695929	6.48	13	PROMOTER	41.113	chr1:114695804-114696054	chr1	114695804	114696054	[15.39, 41.11297]	311	-	114695618	AMPD1	ENST00000369538.3	343	-	114695586	AMPD1	ENST00000520113.6	1995	-	114697924	RN7SL432P	ENST00000484057.3
H929	33240	chrX	153875533	0	0	PROMOTER	15.0741	chrX:153875408-153875658	chrX	153875408	153875658	[15.07411]	314	-	153875847	L1CAM	ENST00000361699.8	411	-	153875944	L1CAM	ENST00000361981.7
H929	32532	chrM	1288	0	0	PROMOTER	14.7627	chrM:1163-1413	chrM	1163	1413	[14.76273]	314	+	1602	MT-TV	ENST00000387342.1	383	+	1671	MT-RNR2	ENST00000387347.2	640	+	648	MT-RNR1	ENST00000389680.2	711	+	577	MT-TF	ENST00000387314.1	1942	+	3230	MT-TL1	ENST00000386347.1
H929	28422	chr16	87384071	0	0	PROMOTER	14.3805	chr16:87383946-87384196	chr16	87383946	87384196	[14.38055]	314	-	87383757	FBXO31	ENST00000311635.11
H929	18566	chr8	73748022	0	0	PROMOTER	7.81738	chr8:73747897-73748147	chr8	73747897	73748147	[7.81738]	314	-	73747708	STAU2	ENST00000522509.5	325	-	73747697	STAU2	ENST00000521727.5	1085	-	73746937	STAU2	ENST00000524300.5	1134	-	73746888	STAU2	ENST00000521419.5	1138	-	73746884	STAU2	ENST00000521451.5	1143	-	73746879	STAU2	ENST00000517542.5	1182	-	73746840	STAU2	ENST00000523558.5:ENST00000521210.5:ENST00000355780.9:ENST00000524104.5
H929	24412	chr12	6784475	6	12	PROMOTER	7.68452	chr12:6784350-6784600	chr12	6784350	6784600	[7.68452, 2.37]	314	-	6784161	RN7SL380P	ENST00000461702.1
H929	24745	chr12	53200758	76.5	153	PROMOTER	17.61	chr12:53200633-53200883	chr12	53200633	53200883	[17.61, 12.57552]	315	-	53200443	ITGB7	ENST00000550743.6
H929	25041	chr12	89352720	0	0	PROMOTER	5.10526	chr12:89352595-89352845	chr12	89352595	89352845	[3.81, 5.10526]	315	-	89352405	DUSP6	ENST00000308385.6	551	-	89353271	DUSP6	ENST00000279488.7	1549	-	89351171	DUSP6	ENST00000547291.1	1705	+	89351015	RP11-823E8.3	ENST00000611513.1
H929	14497	chr6	34237189	1.41	3	PROMOTER	24.8937	chr6:34237064-34237314	chr6	34237064	34237314	[7.97, 24.89366]	316	+	34236873	HMGA1	ENST00000447654.5:ENST00000311487.9:ENST00000347617.10:ENST00000401473.7	1602	+	34238791	HMGA1	ENST00000374116.3
H929	21744	chr10	90871400	2.45	5	PROMOTER	7.96855	chr10:90871275-90871525	chr10	90871275	90871525	[1.15, 7.96855]	316	+	90871716	RPP30	ENST00000371703.7	552	+	90871952	RPP30	ENST00000413330.5
H929	24781	chr12	55929487	0	0	PROMOTER	9.52834	chr12:55929362-55929612	chr12	55929362	55929612	[9.52834]	317	+	55929170	RP11-973D8.5	ENST00000619602.1	1485	+	55930972	DGKA	ENST00000331886.9	1574	-	55927913	PYM1	ENST00000408946.6	1612	-	55927875	PYM1	ENST00000454792.2	1874	-	55927613	PYM1	ENST00000557259.5
H929	25634	chr12	133080155	0	0	PROMOTER	8.34044	chr12:133080030-133080280	chr12	133080030	133080280	[8.34044]	317	+	133079838	ZNF140	ENST00000355557.6	727	+	133080882	ZNF140	ENST00000544426.5	777	+	133080932	ZNF140	ENST00000319849.7:ENST00000440550.6	1763	-	133078392	RP11-386I8.4	ENST00000624401.1
H929	19987	chr9	26955976	4	8	PROMOTER	12.316	chr9:26955851-26956101	chr9	26955851	26956101	[12.31603, 4.61]	319	-	26956295	RP11-337A23.3	ENST00000456198.1	397	+	26956373	IFT74	ENST00000380062.9	503	+	26956479	IFT74	ENST00000429045.6
H929	25167	chr12	98503536	0	0	PROMOTER	9.03585	chr12:98503411-98503661	chr12	98503411	98503661	[9.03585]	319	-	98503855	RP11-181C3.1	ENST00000501499.1
H929	28879	chr17	41930337	2.45	5	PROMOTER	6.31376	chr17:41930212-41930462	chr17	41930212	41930462	[6.31376, 2.13]	319	+	41930656	TTC25	ENST00000377540.5
H929	27821	chr16	17134824	0	0	PROMOTER	9.47937	chr16:17134699-17134949	chr16	17134699	17134949	[9.47937]	320	+	17134504	CTD-2576D5.4	ENST00000567344.1
H929	21208	chr10	22316729	0	0	PROMOTER	5.20867	chr10:22316604-22316854	chr10	22316604	22316854	[5.20867]	320	+	22316409	COMMD3-BMI1	ENST00000602390.5	755	+	22315974	COMMD3	ENST00000376836.7
H929	1234	chr1	146377129	5	10	PROMOTER	47.16	chr1:146377004-146377254	chr1	146377004	146377254	[39.5247, 47.16]	322	+	146376807	RF00003	ENST00000615842.1
H929	2546	chr1	177970536	0	0	PROMOTER	7.48075	chr1:177970411-177970661	chr1	177970411	177970661	[7.48075]	323	-	177970213	SEC16B	ENST00000464631.6	621	-	177969915	SEC16B	ENST00000308284.10
H929	30991	chr19	46714648	1.41	3	PROMOTER	21.3046	chr19:46714523-46714773	chr19	46714523	46714773	[21.30465, 8.37]	324	-	46714324	PRKD2	ENST00000600194.5	1948	-	46716596	PRKD2	ENST00000291281.8
H929	1859	chr1	161399733	0	0	PROMOTER	15.6518	chr1:161399608-161399858	chr1	161399608	161399858	[15.65176]	324	+	161399409	RP11-122G18.12	ENST00000636161.1	1556	+	161401289	RNU6-481P	ENST00000384194.1
H929	22968	chr11	74398912	121	242	PROMOTER	7.32451	chr11:74398787-74399037	chr11	74398787	74399037	[7.32451, 5.27868]	325	+	74399237	MIR548AL	ENST00000578416.1	439	-	74398473	PGM2L1	ENST00000298198.4	1259	+	74397653	RP11-702H23.4	ENST00000533008.1	1363	+	74397549	RP11-702H23.4	ENST00000531906.5
H929	1698	chr1	158204202	0	0	PROMOTER	6.75547	chr1:158204077-158204327	chr1	158204077	158204327	[6.75547]	325	-	158203877	RP11-404O13.5	ENST00000415019.1
H929	25462	chr12	120904697	3	6	PROMOTER	34.1436	chr12:120904572-120904822	chr12	120904572	120904822	[11.5, 34.14359]	326	-	120904371	SPPL3	ENST00000353487.6
H929	27984	chr16	31179784	1	2	PROMOTER	23.0144	chr16:31179659-31179909	chr16	31179659	31179909	[23.01435, 15.01]	326	+	31180110	FUS	ENST00000254108.11	355	+	31180139	FUS	ENST00000380244.7	367	+	31180151	FUS	ENST00000568685.1
H929	32547	chrM	11087	119.5	239	PROMOTER	34.773	chrM:10962-11212	chrM	10962	11212	[22.95467, 34.77301]	327	+	10760	MT-ND4	ENST00000361381.2	617	+	10470	MT-ND4L	ENST00000361335.1	682	+	10405	MT-TR	ENST00000387439.1	1028	+	10059	MT-ND3	ENST00000361227.2	1051	+	12138	MT-TH	ENST00000387441.1	1096	+	9991	MT-TG	ENST00000387429.1	1120	+	12207	MT-TS2	ENST00000387449.1	1179	+
H929	2242	chr1	169894286	5.48	11	PROMOTER	13.4648	chr1:169894161-169894411	chr1	169894161	169894411	[13.46475, 3.6]	327	-	169893959	SCYL3	ENST00000367772.8	334	-	169893952	SCYL3	ENST00000367771.10
H929	27927	chr16	25258279	45.53	99	PROMOTER	7.19	chr16:25258154-25258404	chr16	25258154	25258404	[7.19, 6.49418, 4.12]	327	+	25257952	CTD-2547G23.4	ENST00000612792.1	348	-	25257931	ZKSCAN2	ENST00000328086.11
H929	28804	chr17	35578301	0	0	PROMOTER	7.97	chr17:35578176-35578426	chr17	35578176	35578426	[7.97]	328	-	35578629	PEX12	ENST00000225873.8	336	-	35578637	PEX12	ENST00000613219.4
H929	25446	chr12	120292231	10.49	21	PROMOTER	6.94638	chr12:120292106-120292356	chr12	120292106	120292356	[6.94638, 1.11]	328	-	120291903	RNU4-2	ENST00000365668.1	1006	-	120293237	RNU4-1	ENST00000363925.1
H929	10901	chr5	24353115	9.49	19	PROMOTER	5.59729	chr5:24352990-24353240	chr5	24352990	24353240	[5.59729, 2.02]	328	-	24353443	CTD-2074D8.1	ENST00000507526.1
H929	27973	chr16	30471916	3.46	7	PROMOTER	24.243	chr16:30471791-30472041	chr16	30471791	30472041	[24.24303, 2.64]	329	+	30471587	RF00019	ENST00000410769.1	742	+	30472658	ITGAL	ENST00000356798.10	813	+	30472729	ITGAL	ENST00000358164.9	835	+	30472751	ITGAL	ENST00000433423.2
H929	32534	chrM	2000	0	0	PROMOTER	16.4801	chrM:1875-2125	chrM	1875	2125	[16.48008]	329	+	1671	MT-RNR2	ENST00000387347.2	398	+	1602	MT-TV	ENST00000387342.1	1230	+	3230	MT-TL1	ENST00000386347.1	1307	+	3307	MT-ND1	ENST00000361390.2	1352	+	648	MT-RNR1	ENST00000389680.2	1423	+	577	MT-TF	ENST00000387314.1
H929	21495	chr10	69179902	0	0	PROMOTER	6.50139	chr10:69179777-69180027	chr10	69179777	69180027	[6.50139]	330	+	69180232	SUPV3L1	ENST00000359655.8
H929	20693	chr9	114806457	3	6	PROMOTER	39.1398	chr9:114806332-114806582	chr9	114806332	114806582	[14.84, 39.13976]	331	-	114806126	TNFSF15	ENST00000374045.4
H929	23918	chr11	121590088	0	1	PROMOTER	21.7379	chr11:121589963-121590213	chr11	121589963	121590213	[18.79, 21.73786]	331	+	121590419	SORL1	ENST00000527934.1
H929	28940	chr17	46580013	0	0	PROMOTER	6.44607	chr17:46579888-46580138	chr17	46579888	46580138	[6.44607]	331	-	46579682	ARL17A	ENST00000336125.5	340	-	46579673	ARL17A	ENST00000622488.6	342	-	46579671	ARL17A	ENST00000329240.10	343	-	46579670	ARL17A	ENST00000445552.6	356	-	46579657	ARL17A	ENST00000570550.5	362	-	46579651	ARL17A	ENST00000573185.5
H929	16013	chr7	7640420	4.47	9	PROMOTER	8.52895	chr7:7640295-7640545	chr7	7640295	7640545	[8.52895, 4.62]	332	+	7640752	RP11-505D17.1	ENST00000469183.5	332	+	7640752	UMAD1	ENST00000463725.5	356	+	7640776	UMAD1	ENST00000636849.1	374	+	7640794	UMAD1	ENST00000482067.3	394	-	7640026	RPA3	ENST00000401447.1	396	-	7640816	RPA3	ENST00000406109.5	552	-	7640972	RPA3	ENST00000396682.6
H929	17996	chr8	42338123	10.49	21	PROMOTER	6.34913	chr8:42337998-42338248	chr8	42337998	42338248	[6.34913, 4.37]	332	+	42338455	POLB	ENST00000265421.8
H929	16389	chr7	43648947	1.41	3	PROMOTER	8.86031	chr7:43648822-43649072	chr7	43648822	43649072	[1.56, 8.86031]	333	-	43648614	COA1	ENST00000640232.1	1349	-	43650296	COA1	ENST00000395879.5
H929	27482	chr15	89760924	1	2	PROMOTER	6.18824	chr15:89760799-89761049	chr15	89760799	89761049	[6.18824, 1.0]	333	+	89760591	MESP2	ENST00000560219.2
H929	29453	chr18	3594448	2.45	5	PROMOTER	15.225	chr18:3594323-3594573	chr18	3594323	3594573	[15.22501, 3.39]	334	+	3594114	RP11-874J12.2	ENST00000317114.1
H929	12065	chr5	91380015	0	0	PROMOTER	7.09076	chr5:91379890-91380140	chr5	91379890	91380140	[7.09076]	334	+	91380349	ARRDC3-AS1	ENST00000625713.2
H929	13711	chr5	173790589	0	0	PROMOTER	7.12534	chr5:173790464-173790714	chr5	173790464	173790714	[7.12534]	336	-	173790925	CTB-43E15.4	ENST00000523617.5	353	-	173790942	CTB-43E15.4	ENST00000522731.1
H929	14438	chr6	31541967	0	0	PROMOTER	6.24045	chr6:31541842-31542092	chr6	31541842	31542092	[6.24045]	337	+	31542304	XXbac-BPG296P20.15	ENST00000420520.1	481	-	31542448	DDX39B	ENST00000396172.5:ENST00000458640.5	789	-	31541178	SNORD84	ENST00000584275.1	1431	-	31540536	DDX39B	ENST00000376177.6
H929	14330	chr6	27823771	0	0	PROMOTER	5.59729	chr6:27823646-27823896	chr6	27823646	27823896	[5.59729]	337	+	27824108	HIST1H4J	ENST00000355057.2
H929	10396	chr4	185587571	0	0	PROMOTER	5.07554	chr4:185587446-185587696	chr4	185587446	185587696	[5.07554]	338	+	185587909	RP11-301L8.2	ENST00000411847.1
H929	1228	chr1	146037085	0	0	PROMOTER	29.8812	chr1:146036960-146037210	chr1	146036960	146037210	[29.88122]	339	-	146036746	HJV	ENST00000636675.1
H929	30746	chr19	18233332	0	0	PROMOTER	9.00732	chr19:18233207-18233457	chr19	18233207	18233457	[4.11, 9.00732]	339	-	18233671	PDE4C	ENST00000594465.7
H929	32456	chr22	42615584	0	0	PROMOTER	10.82	chr22:42615459-42615709	chr22	42615459	42615709	[10.82]	340	+	42615244	RNU12	ENST00000362512.1:ENST00000602478.1	622	-	42614962	POLDIP3	ENST00000252115.9:ENST00000451060.6	653	-	42614931	POLDIP3	ENST00000348657.6	673	-	42614911	POLDIP3	ENST00000617178.4	727	-	42614857	POLDIP3	ENST00000339677.10
H929	3993	chr2	21317320	7.48	15	PROMOTER	7.14927	chr2:21317195-21317445	chr2	21317195	21317445	[3.57, 7.14927]	340	+	21317660	AC011752.1	ENST00000451476.1
H929	384	chr1	28648942	3.46	7	PROMOTER	33.6359	chr1:28648817-28649067	chr1	28648817	28649067	[33.63587, 21.15]	342	+	28648600	RNU11	ENST00000602813.1:ENST00000387069.1
H929	7870	chr3	138348039	3.46	7	PROMOTER	17.8838	chr3:138347914-138348164	chr3	138347914	138348164	[17.88382, 3.83]	342	+	138347697	MRAS	ENST00000289104.8	391	+	138347648	MRAS	ENST00000614350.4	433	+	138348472	MRAS	ENST00000423968.6	627	+	138348666	MRAS	ENST00000621127.4	811	+	138348850	MRAS	ENST00000464896.5	1223	+	138349262	MRAS	ENST00000474559.1
H929	13439	chr5	159210395	0	0	PROMOTER	6.6127	chr5:159210270-159210520	chr5	159210270	159210520	[6.6127]	342	-	159210053	RNF145	ENST00000518802.5	474	+	159209921	CTB-11I22.1	ENST00000521204.1	797	-	159209598	RNF145	ENST00000611185.4	844	-	159209551	RNF145	ENST00000424310.6
H929	24443	chr12	8996909	3	6	PROMOTER	26.6017	chr12:8996784-8997034	chr12	8996784	8997034	[26.60174, 10.09]	343	-	8996566	RP11-259O18.4	ENST00000545706.1
H929	7167	chr3	66501354	0	0	PROMOTER	6.75547	chr3:66501229-66501479	chr3	66501229	66501479	[6.75547]	343	-	66501011	LRIG1	ENST00000383703.3	422	-	66500932	LRIG1	ENST00000273261.7
H929	3524	chr1	234962843	6.48	13	PROMOTER	42.1192	chr1:234962718-234962968	chr1	234962718	234962968	[21.35, 42.11921]	345	-	234963188	RP11-443B7.1	ENST00000423175.1	1156	-	234963999	RP11-443B7.1	ENST00000418557.1
H929	7645	chr3	119323105	0	0	PROMOTER	7.87189	chr3:119322980-119323230	chr3	119322980	119323230	[7.87189]	345	-	119322760	RP11-305I9.3	ENST00000466292.1
H929	31277	chr20	33732173	0	0	PROMOTER	5.1199	chr20:33732048-33732298	chr20	33732048	33732298	[5.1199]	345	-	33731828	RP4-553F4.2	ENST00000441029.2	413	+	33731760	ZNF341	ENST00000375200.5	516	+	33731657	ZNF341	ENST00000342427.6
H929	9511	chr4	98929480	0	0	PROMOTER	12.132	chr4:98929355-98929605	chr4	98929355	98929605	[12.13202]	347	-	98929133	EIF4E	ENST00000505992.1	355	-	98929125	EIF4E	ENST00000504432.5	388	-	98929092	EIF4E	ENST00000280892.10	583	+	98928897	RP11-571L19.7	ENST00000583654.1	1157	-	98930637	EIF4E	ENST00000450253.6
H929	18130	chr8	51900062	4.47	9	PROMOTER	8.44993	chr8:51899937-51900187	chr8	51899937	51900187	[8.44993, 4.61]	347	+	51899715	RP11-110G21.1	ENST00000520357.1	413	+	51899649	RP11-110G21.1	ENST00000423716.1	737	+	51899325	RP11-110G21.1	ENST00000518942.1	876	-	51899186	PCMTD1	ENST00000544451.2	949	-	51899113	PCMTD1	ENST00000521344.1	964	-	51899098	PCMTD1	ENST00000360540.9	1026	-	51899036	PCMTD1	ENST00000522514.5
H929	31539	chr20	45254912	10	20	PROMOTER	19.1434	chr20:45254787-45255037	chr20	45254787	45255037	[19.14338, 10.61]	348	-	45254564	SLPI	ENST00000338380.2
H929	28091	chr16	56931700	0	1	PROMOTER	17.3605	chr16:56931575-56931825	chr16	56931575	56931825	[17.36048, 5.91]	348	+	56932048	HERPUD1	ENST00000439977.6	447	+	56932147	HERPUD1	ENST00000300302.9:ENST00000344114.8	460	+	56932160	HERPUD1	ENST00000379792.6
H929	30663	chr19	12890678	0	0	PROMOTER	6.91684	chr19:12890553-12890803	chr19	12890553	12890803	[6.91684]	348	+	12891026	GCDH	ENST00000222214.9	482	+	12891160	GCDH	ENST00000591470.5
H929	30079	chr18	58600282	3.46	7	PROMOTER	11.995	chr18:58600157-58600407	chr18	58600157	58600407	[5.42, 11.99498]	349	+	58600631	SNORA108	ENST00000516475.1
H929	30858	chr19	39412236	3	6	PROMOTER	5.67647	chr19:39412111-39412361	chr19	39412111	39412361	[2.28, 5.67647]	349	+	39412585	PLEKHG2	ENST00000425673.5	1073	+	39413309	PLEKHG2	ENST00000458508.6	1429	+	39413665	PLEKHG2	ENST00000409797.6
H929	30461	chr19	1652954	2.45	5	PROMOTER	90.303	chr19:1652829-1653079	chr19	1652829	1653079	[48.13, 90.30296]	350	-	1652604	TCF3	ENST00000395423.7	363	-	1652591	TCF3	ENST00000453954.6	625	-	1652329	TCF3	ENST00000262965.9:ENST00000344749.9
H929	19379	chr8	116765905	0	0	PROMOTER	7.14092	chr8:116765780-116766030	chr8	116765780	116766030	[7.14092]	350	-	116766255	EIF3H	ENST00000276682.8	598	+	116766503	UTP23	ENST00000309822.6	667	+	116766572	UTP23	ENST00000517820.1
H929	4198	chr2	38147064	4	8	PROMOTER	17.5074	chr2:38146939-38147189	chr2	38146939	38147189	[17.50744, 8.61]	351	+	38147415	RNU6-951P	ENST00000362733.1
H929	20076	chr9	35757589	0	0	PROMOTER	6.74773	chr9:35757464-35757714	chr9	35757464	35757714	[6.74773]	351	-	35757940	RP11-112J3.15	ENST00000425499.2
H929	31715	chr20	53413262	7.48	15	PROMOTER	25.3367	chr20:53413137-53413387	chr20	53413137	53413387	[25.33672, 6.51]	352	-	53412910	RP4-669H2.1	ENST00000436286.2
H929	21452	chr10	51699943	2	4	PROMOTER	23.4705	chr10:51699818-51700068	chr10	51699818	51700068	[23.47055, 9.39]	352	-	51699591	CSTF2T	ENST00000331173.5
H929	14246	chr6	26204904	6.48	13	PROMOTER	8.83508	chr6:26204779-26205029	chr6	26204779	26205029	[8.83508, 2.57]	352	+	26204552	HIST1H4E	ENST00000615164.2
H929	4239	chr2	39513794	0	0	PROMOTER	6.75547	chr2:39513669-39513919	chr2	39513669	39513919	[6.75547]	352	+	39514146	AC007246.3	ENST00000438649.5
H929	30075	chr18	58512663	4.47	9	PROMOTER	12.546	chr18:58512538-58512788	chr18	58512538	58512788	[12.54599, 4.02]	353	-	58512310	RP11-1151B14.5	ENST00000610389.1
H929	30150	chr18	62715097	57	114	PROMOTER	10.1002	chr18:62714972-62715222	chr18	62714972	62715222	[10.10021, 9.4]	353	+	62715450	PHLPP1	ENST00000262719.9
H929	1910	chr1	162565684	5.48	11	PROMOTER	9.6596	chr1:162565559-162565809	chr1	162565559	162565809	[1.33, 9.6596]	353	+	162566037	UAP1	ENST00000367924.1:ENST00000367925.5
H929	2110	chr1	166489686	0	0	PROMOTER	8.10232	chr1:166489561-166489811	chr1	166489561	166489811	[8.10232]	353	-	166490039	RP11-276E17.2	ENST00000426519.1
H929	32191	chr22	22720269	0	0	PROMOTER	6.75547	chr22:22720144-22720394	chr22	22720144	22720394	[6.75547]	354	+	22720623	IGLV3-19	ENST00000390309.2
H929	32261	chr22	28818687	0	0	PROMOTER	7.33568	chr22:28818562-28818812	chr22	28818562	28818812	[7.33568]	356	+	28818331	CTA-292E10.6	ENST00000422972.1
H929	28179	chr16	68369905	5	10	PROMOTER	12.0132	chr16:68369780-68370030	chr16	68369780	68370030	[9.97, 12.01323]	357	-	68370262	RP11-71L14.3	ENST00000624251.1
H929	17403	chr7	156893587	0	1	PROMOTER	9.85672	chr7:156893462-156893712	chr7	156893462	156893712	[9.85672, 5.62]	357	-	156893230	LMBR1	ENST00000353442.9	379	-	156893208	LMBR1	ENST00000359422.8
H929	26902	chr15	38072326	0	0	PROMOTER	7.74077	chr15:38072201-38072451	chr15	38072201	38072451	[7.74077]	357	-	38072683	RP11-1008C21.2	ENST00000434223.3	424	-	38071902	RP11-1008C21.2	ENST00000559232.1
H929	17228	chr7	139340716	0	0	PROMOTER	6.53221	chr7:139340591-139340841	chr7	139340591	139340841	[6.53221]	357	+	139340359	LUC7L2	ENST00000541170.7	416	+	139341132	FMC1	ENST00000297534.6	644	+	139341360	C7orf55-LUC7L2	ENST00000541515.3
H929	3068	chr1	209937816	4.47	9	PROMOTER	18.3915	chr1:209937691-209937941	chr1	209937691	209937941	[18.39149, 9.87]	358	+	209938174	SYT14	ENST00000367019.5:ENST00000537238.5	370	+	209938186	SYT14	ENST00000637265.1	435	+	209938251	SYT14	ENST00000629778.3:ENST00000472886.5
H929	24753	chr12	53379835	110.63	240	PROMOTER	37.409	chr12:53379710-53379960	chr12	53379710	53379960	[11.12, 37.40898, 12.91]	359	+	53380194	SP1	ENST00000327443.8	804	+	53380639	SP1	ENST00000426431.2
H929	1203	chr1	145281478	0	0	PROMOTER	47.5	chr1:145281353-145281603	chr1	145281353	145281603	[47.5]	362	+	145281116	CH17-373J23.1	ENST00000618589.1	362	+	145281116	RNVU1-14	ENST00000384770.1
H929	6372	chr2	240586336	5.48	11	PROMOTER	10.0294	chr2:240586211-240586461	chr2	240586211	240586461	[10.02942, 9.7]	363	-	240586699	RP11-27M15.1	ENST00000567819.1	380	+	240586716	CAPN10	ENST00000391984.6	403	+	240586739	CAPN10	ENST00000404753.7	436	+	240586772	CAPN10	ENST00000270364.11	535	+	240586871	CAPN10	ENST00000352879.8:ENST00000354082.8
H929	33043	chrX	130166250	0	0	PROMOTER	5.50175	chrX:130166125-130166375	chrX	130166125	130166375	[5.50175]	363	-	130165887	AIFM1	ENST00000535724.5:ENST00000287295.7	371	-	130165879	AIFM1	ENST00000319908.7	570	-	130165680	AIFM1	ENST00000346424.6
H929	29011	chr17	50867614	5	10	PROMOTER	20.0441	chr17:50867489-50867739	chr17	50867489	50867739	[10.8, 20.0441]	364	-	50867978	TOB1	ENST00000268957.3	466	+	50867148	AC091062.2	ENST00000514358.1	935	+	50866679	AC091062.2	ENST00000416263.3	1269	-	50866345	TOB1	ENST00000499247.2
H929	7030	chr3	53161563	1.41	3	PROMOTER	16.1447	chr3:53161438-53161688	chr3	53161438	53161688	[7.64, 16.14474]	364	+	53161199	PRKCD	ENST00000330452.7	443	+	53161120	PRKCD	ENST00000394729.6
H929	13533	chr5	163461021	0	0	PROMOTER	5.80849	chr5:163460896-163461146	chr5	163460896	163461146	[5.80849]	364	+	163460657	HMMR	ENST00000358715.3	387	+	163460634	HMMR	ENST00000432118.6	471	+	163460550	HMMR	ENST00000393915.8	655	+	163460366	HMMR	ENST00000353866.7	881	-	163460140	NUDCD2	ENST00000302764.8	966	-	163460055	NUDCD2	ENST00000517501.1
H929	322	chr1	26695668	4	8	PROMOTER	20.4194	chr1:26695543-26695793	chr1	26695543	26695793	[20.41944, 7.76]	365	+	26696033	ARID1A	ENST00000324856.12	736	+	26696404	ARID1A	ENST00000457599.6	1537	-	26694131	RP5-968P14.2	ENST00000569378.1
H929	1306	chr1	148522966	0	0	PROMOTER	15.12	chr1:148522841-148523091	chr1	148522841	148523091	[15.12]	365	+	148522601	RF00003	ENST00000622285.1
H929	31107	chr19	55635094	0	0	PROMOTER	5.59278	chr19:55634969-55635219	chr19	55634969	55635219	[5.59278]	365	+	55635459	ZNF581	ENST00000587252.5
H929	18558	chr8	73293268	0	0	PROMOTER	5.34262	chr8:73293143-73293393	chr8	73293143	73293393	[5.34262]	365	-	73293633	RPL7	ENST00000396467.5	630	-	73293898	RPL7	ENST00000352983.6	1170	-	73294438	RPL7	ENST00000396465.5	1344	+	73294612	RDH10	ENST00000240285.9
H929	28491	chr17	2266565	0	0	PROMOTER	9.39193	chr17:2266440-2266690	chr17	2266440	2266690	[9.39193]	366	-	2266199	SMG6	ENST00000354901.8
H929	5599	chr2	181106334	0	0	PROMOTER	7.14927	chr2:181106209-181106459	chr2	181106209	181106459	[7.14927]	366	-	181105968	AC068196.1	ENST00000456895.1
H929	9391	chr4	86595099	2	4	PROMOTER	28.9289	chr4:86594974-86595224	chr4	86594974	86595224	[28.92891, 8.93]	367	+	86594732	PTPN13	ENST00000316707.10:ENST00000411767.6	474	-	86594625	MAPK10	ENST00000641051.1	782	+	86594317	PTPN13	ENST00000502971.5	784	+	86594315	PTPN13	ENST00000427191.6:ENST00000436978.5	968	-	86594131	MAPK10	ENST00000513186.7	989	-	86594110	MAPK10	ENST00000641737.1	1011	-	86594088	MAPK10	ENST00000641391.1:ENST00000641157.1	1025	-
H929	24794	chr12	56360493	0	0	PROMOTER	11.5546	chr12:56360368-56360618	chr12	56360368	56360618	[11.55462]	367	-	56360126	STAT2	ENST00000557235.5:ENST00000418572.6	419	-	56360074	STAT2	ENST00000314128.8
H929	33099	chrX	134807649	0	0	PROMOTER	8.02046	chrX:134807524-134807774	chrX	134807524	134807774	[8.02046]	368	+	134807281	FAM122C	ENST00000643150.1	410	+	134807239	FAM122C	ENST00000494709.1	426	+	134807223	FAM122C	ENST00000475361.1	432	+	134807217	FAM122C	ENST00000482240.5	455	+	134807194	FAM122C	ENST00000370785.4	456	+	134807193	FAM122C	ENST00000370784.8	458	+	134807191	FAM122C	ENST00000623326.4	480	+
H929	12542	chr5	115545262	0	1	PROMOTER	6.5057	chr5:115545137-115545387	chr5	115545137	115545387	[6.5057, 2.57]	368	-	115544894	FEM1C	ENST00000274457.4
H929	2637	chr1	182588887	4.47	9	PROMOTER	16.1206	chr1:182588762-182589012	chr1	182588762	182589012	[15.39, 16.12064]	369	-	182589256	RNASEL	ENST00000367559.7:ENST00000539397.1
H929	30971	chr19	45479197	0	0	PROMOTER	5.47381	chr19:45479072-45479322	chr19	45479072	45479322	[5.47381]	369	-	45478828	ERCC1	ENST00000423698.6
H929	32793	chrX	48508469	0	0	PROMOTER	5.34262	chrX:48508344-48508594	chrX	48508344	48508594	[5.34262]	369	-	48508838	AF196972.9	ENST00000445586.1	493	+	48508962	PORCN	ENST00000359882.8	533	+	48509002	PORCN	ENST00000355961.8	571	+	48509040	PORCN	ENST00000361988.7	1309	+	48509778	PORCN	ENST00000326194.10	1352	+	48509821	PORCN	ENST00000367574.8:ENST00000537758.5
H929	28841	chr17	39153069	14.49	29	PROMOTER	9.46222	chr17:39152944-39153194	chr17	39152944	39153194	[9.46222, 2.84]	370	-	39152699	PLXDC1	ENST00000444911.6	1420	-	39151649	PLXDC1	ENST00000315392.8
H929	9335	chr4	82429027	0	0	PROMOTER	5.61695	chr4:82428902-82429152	chr4	82428902	82429152	[5.61695]	370	-	82429397	HNRNPDL	ENST00000507721.5	414	-	82429441	HNRNPDL	ENST00000602300.5	839	-	82429866	HNRNPDL	ENST00000295470.9	1198	-	82430225	HNRNPDL	ENST00000614627.4:ENST00000621267.4	1372	-	82430399	HNRNPDL	ENST00000630827.1	1535	+	82430562	ENOPH1	ENST00000273920.7	1621	+	82430648	ENOPH1	ENST00000509635.5	1635	+
H929	11384	chr5	55859139	0	0	PROMOTER	5.1523	chr5:55859014-55859264	chr5	55859014	55859264	[5.1523]	370	+	55859509	IL31RA	ENST00000611895.1
H929	26261	chr14	68685936	0	0	PROMOTER	12.316	chr14:68685811-68686061	chr14	68685811	68686061	[12.31603]	371	-	68685565	CTD-2325P2.3	ENST00000556919.1
H929	9798	chr4	128812215	0	0	PROMOTER	8.58605	chr4:128812090-128812340	chr4	128812090	128812340	[8.58605]	371	+	128811844	JADE1	ENST00000611140.4	889	+	128811326	JADE1	ENST00000413543.6	945	+	128811270	JADE1	ENST00000610919.4
H929	1201	chr1	145214479	0	0	PROMOTER	6.48727	chr1:145214354-145214604	chr1	145214354	145214604	[6.48727]	372	+	145214851	CH17-195P21.2	ENST00000628937.1
H929	28664	chr17	19063763	110.56	237	PROMOTER	25.1908	chr17:19063638-19063888	chr17	19063638	19063888	[7.14927, 25.19078, 6.61]	373	-	19064136	SNORD3B-2	ENST00000571722.3	1851	+	19061912	SNORD3B-1	ENST00000577988.2
H929	14443	chr6	31620346	1.41	3	PROMOTER	9.06517	chr6:31620221-31620471	chr6	31620221	31620471	[3.97, 9.06517]	374	+	31620720	PRRC2A	ENST00000376007.8	379	+	31620725	PRRC2A	ENST00000376033.2
H929	22315	chr11	6203629	0	1	PROMOTER	6.75547	chr11:6203504-6203754	chr11	6203504	6203754	[6.75547, 1.26]	376	-	6203253	RP11-290F24.6	ENST00000600308.1	1937	+	6205566	C11orf42	ENST00000316375.2
H929	11260	chr5	43042794	0	0	PROMOTER	6.31426	chr5:43042669-43042919	chr5	43042669	43042919	[6.31426]	376	-	43043170	ANXA2R	ENST00000314890.3	1037	+	43041757	AC025171.1	ENST00000505541.1	1219	+	43041575	AC025171.1	ENST00000451894.6
H929	22468	chr11	18395889	10.49	21	PROMOTER	9.32648	chr11:18395764-18396014	chr11	18395764	18396014	[9.32648, 6.03]	377	+	18396266	LDHA	ENST00000540430.5	389	+	18396278	LDHA	ENST00000379412.9	665	+	18396554	LDHA	ENST00000542179.1	954	+	18396843	LDHA	ENST00000625635.1	1303	+	18394586	LDHA	ENST00000227157.8	1327	+	18394562	LDHA	ENST00000430553.6:ENST00000396222.6	1501	+	18394388	LDHA	ENST00000422447.7
H929	32553	chrM	16401	0	0	PROMOTER	5.76172	chrM:16276-16526	chrM	16276	16526	[5.76172]	378	-	16023	MT-TP	ENST00000387461.2	513	+	15888	MT-TT	ENST00000387460.2	1654	+	14747	MT-CYB	ENST00000361789.2	1659	-	14742	MT-TE	ENST00000387459.1	1728	-	14673	MT-ND6	ENST00000361681.2
H929	21904	chr10	102132615	0	0	PROMOTER	8.67459	chr10:102132490-102132740	chr10	102132490	102132740	[8.67459]	379	+	102132994	PPRC1	ENST00000413464.6	415	+	102133030	PPRC1	ENST00000278070.6
H929	7243	chr3	72178658	0	0	PROMOTER	8.13157	chr3:72178533-72178783	chr3	72178533	72178783	[8.13157]	379	+	72178279	RP11-433A10.3	ENST00000608390.1
H929	21587	chr10	78029924	0	0	PROMOTER	5.78149	chr10:78029799-78030049	chr10	78029799	78030049	[5.78149]	379	-	78029545	POLR3A	ENST00000372371.7
H929	4577	chr2	70249041	2.45	5	PROMOTER	9.32648	chr2:70248916-70249166	chr2	70248916	70249166	[5.66, 9.32648]	381	-	70248660	TIA1	ENST00000415783.6	400	-	70248641	TIA1	ENST00000433529.6	431	-	70248610	TIA1	ENST00000445587.5	461	-	70248580	TIA1	ENST00000282574.8	587	-	70248454	TIA1	ENST00000416149.6
H929	32540	chrM	6285	0	0	PROMOTER	5.70292	chrM:6160-6410	chrM	6160	6410	[5.70292]	381	+	5904	MT-CO1	ENST00000361624.2	394	-	5891	MT-TY	ENST00000387409.1	459	-	5826	MT-TC	ENST00000387405.1	556	-	5729	MT-TN	ENST00000387400.1	630	-	5655	MT-TA	ENST00000387392.1	773	+	5512	MT-TW	ENST00000387382.1	1229	-	7514	MT-TS1	ENST00000387416.2	1233	+
H929	5216	chr2	148645381	86.15	188	PROMOTER	136.01	chr2:148645256-148645506	chr2	148645256	148645506	[29.22, 103.54219, 136.01]	382	+	148644999	EPC2	ENST00000409654.5	397	+	148644984	EPC2	ENST00000258484.10
H929	12183	chr5	96935082	9.49	19	PROMOTER	21.6315	chr5:96934957-96935207	chr5	96934957	96935207	[21.6315, 13.87]	382	+	96935464	LNPEP	ENST00000231368.9	727	-	96935809	CTD-2260A17.2	ENST00000501338.5
H929	11226	chr5	41903967	0	0	PROMOTER	9.35705	chr5:41903842-41904092	chr5	41903842	41904092	[9.35705]	382	+	41904349	C5orf51	ENST00000381647.6	401	+	41904368	C5orf51	ENST00000612065.1
H929	15177	chr6	106098558	0	0	PROMOTER	7.96855	chr6:106098433-106098683	chr6	106098433	106098683	[7.96855]	382	+	106098940	PRDM1	ENST00000369089.3	1582	+	106100140	RP1-134E15.3	ENST00000602426.1
H929	9930	chr4	143559075	0	0	PROMOTER	6.09389	chr4:143558950-143559200	chr4	143558950	143559200	[6.09389]	382	+	143559457	RP11-673E1.1	ENST00000641328.1	1052	+	143560127	RP11-673E1.1	ENST00000511042.5
H929	31239	chr20	31572880	0	0	PROMOTER	11.7614	chr20:31572755-31573005	chr20	31572755	31573005	[11.76135]	383	-	31573263	RP3-324O17.2	ENST00000412178.1
H929	6199	chr2	226906328	0	0	PROMOTER	19.9459	chr2:226906203-226906453	chr2	226906203	226906453	[19.94595]	384	+	226906712	RHBDD1	ENST00000409053.1
H929	5863	chr2	201257651	6	12	PROMOTER	6.469	chr2:201257526-201257776	chr2	201257526	201257776	[4.39, 6.469]	385	+	201258036	CASP8	ENST00000358485.8	440	+	201258091	CASP8	ENST00000392266.7
H929	18745	chr8	85220807	0	0	PROMOTER	11.6748	chr8:85220682-85220932	chr8	85220682	85220932	[11.67485]	386	-	85220421	C8orf59	ENST00000545322.5	423	-	85220384	C8orf59	ENST00000612977.4	432	-	85220375	C8orf59	ENST00000612809.4	433	-	85220374	C8orf59	ENST00000619594.4	440	-	85220367	C8orf59	ENST00000614462.4	454	-	85220353	C8orf59	ENST00000615697.4	468	-	85220339	C8orf59	ENST00000321777.5
H929	17959	chr8	39913843	2	4	PROMOTER	8.25481	chr8:39913718-39913968	chr8	39913718	39913968	[2.43, 8.25481]	386	+	39914229	RP11-44K6.2	ENST00000520185.1	559	+	39913284	IDO1	ENST00000518237.5
H929	14409	chr6	30516653	0	1	PROMOTER	14.5019	chr6:30516528-30516778	chr6	30516528	30516778	[7.51, 14.50188]	387	+	30516266	XXbac-BPG249D20.9	ENST00000415195.1
H929	24989	chr12	78863606	4.47	9	PROMOTER	9.32	chr12:78863481-78863731	chr12	78863481	78863731	[5.07554, 9.32]	387	+	78863993	SYT1	ENST00000393240.7	1063	+	78864669	SYT1	ENST00000261205.8	1206	+	78864812	SYT1	ENST00000457153.6
H929	13728	chr5	174056197	0	0	PROMOTER	7.14927	chr5:174056072-174056322	chr5	174056072	174056322	[7.14927]	388	-	174056585	RP11-619L12.3	ENST00000523279.1
H929	18213	chr8	55772754	0	0	PROMOTER	5.68548	chr8:55772629-55772879	chr8	55772629	55772879	[5.68548]	388	+	55773142	TGS1	ENST00000260129.5	580	-	55773334	TMEM68	ENST00000523073.5	598	-	55773352	TMEM68	ENST00000519784.5	600	-	55773354	TMEM68	ENST00000434581.6	613	-	55773367	TMEM68	ENST00000521229.5	624	-	55773378	TMEM68	ENST00000522576.5	653	-	55773407	TMEM68	ENST00000334667.6
H929	16730	chr7	90403857	4.47	9	PROMOTER	18.6591	chr7:90403732-90403982	chr7	90403732	90403982	[8.14, 18.65909]	390	+	90403467	CLDN12	ENST00000394605.2	423	+	90403434	CTB-13L3.1	ENST00000480135.1	471	+	90403386	CLDN12	ENST00000287916.8
H929	13246	chr5	151252502	3	6	PROMOTER	5.69	chr5:151252377-151252627	chr5	151252377	151252627	[5.69, 4.44409]	390	+	151252892	GM2A	ENST00000357164.3
H929	25111	chr12	94562179	0	0	PROMOTER	5.14483	chr12:94562054-94562304	chr12	94562054	94562304	[5.14483]	390	+	94561789	MIR5700	ENST00000582250.1
H929	15309	chr6	113856971	0	0	PROMOTER	8.25808	chr6:113856846-113857096	chr6	113856846	113857096	[8.25808]	391	+	113857362	MARCKS	ENST00000612661.1
H929	22814	chr11	64185663	0	0	PROMOTER	5.07054	chr11:64185538-64185788	chr11	64185538	64185788	[5.07054]	391	+	64185272	STIP1	ENST00000358794.9	452	+	64186115	STIP1	ENST00000305218.8	541	+	64186204	STIP1	ENST00000538945.5	562	+	64186225	STIP1	ENST00000543847.1
H929	2432	chr1	173824896	2	4	PROMOTER	7.31	chr1:173824771-173825021	chr1	173824771	173825021	[3.11541, 7.31]	393	+	173824503	DARS2	ENST00000361951.4	574	-	173824322	CENPL	ENST00000356198.6	722	-	173824174	CENPL	ENST00000367710.7	764	-	173824132	CENPL	ENST00000345664.10
H929	4501	chr2	65437124	0	0	PROMOTER	6.09389	chr2:65436999-65437249	chr2	65436999	65437249	[6.09389]	394	+	65436730	AC074391.1	ENST00000377977.3	413	+	65436711	AC074391.1	ENST00000606978.5
H929	281	chr1	24965405	6	12	PROMOTER	30.1385	chr1:24965280-24965530	chr1	24965280	24965530	[30.13852, 9.53]	395	-	24965010	RUNX3	ENST00000399916.5	421	-	24964984	RUNX3	ENST00000338888.3
H929	11028	chr5	32532213	6	12	PROMOTER	15.2462	chr5:32532088-32532338	chr5	32532088	32532338	[1.4, 15.24624]	395	+	32531818	SUB1	ENST00000512913.5	580	+	32531633	SUB1	ENST00000506237.5
H929	15704	chr6	143511295	0	0	PROMOTER	6.84445	chr6:143511170-143511420	chr6	143511170	143511420	[6.84445]	395	-	143511690	FUCA2	ENST00000002165.10
H929	5466	chr2	170928921	0	0	PROMOTER	5.80774	chr2:170928796-170929046	chr2	170928796	170929046	[5.80774]	395	+	170928526	GORASP2	ENST00000234160.4
H929	26661	chr14	96741586	0	0	PROMOTER	5.6952	chr14:96741461-96741711	chr14	96741461	96741711	[5.6952]	395	+	96741191	RP11-433J8.2	ENST00000556669.1
H929	14249	chr6	26223803	9	18	PROMOTER	9.57742	chr6:26223678-26223928	chr6	26223678	26223928	[9.57742, 2.23]	396	+	26224199	HIST1H3E	ENST00000634733.1	1352	+	26225155	HIST1H3E	ENST00000614911.2
H929	1351	chr1	150236553	7	14	PROMOTER	12.7219	chr1:150236428-150236678	chr1	150236428	150236678	[9.11, 12.72193]	397	-	150236156	ANP32E	ENST00000583931.5:ENST00000629042.2	414	+	150236967	RNU2-17P	ENST00000410290.1	454	-	150236099	ANP32E	ENST00000369115.3	468	-	150236085	ANP32E	ENST00000369114.9	531	-	150236022	ANP32E	ENST00000436748.6	598	-	150235955	ANP32E	ENST00000533654.5	1875	-	150234678	ANP32E	ENST00000616917.4
H929	23833	chr11	118214494	68.06	150	PROMOTER	11.6944	chr11:118214369-118214619	chr11	118214369	118214619	[4.79, 11.6944, 2.45]	397	-	118214891	JAML	ENST00000533261.5	1135	-	118213359	JAML	ENST00000292067.11
H929	4132	chr2	33475830	0	0	PROMOTER	13.9581	chr2:33475705-33475955	chr2	33475705	33475955	[13.95811]	398	+	33476228	RASGRP3	ENST00000403687.7
H929	591	chr1	46340787	2	4	PROMOTER	20.3888	chr1:46340662-46340912	chr1	46340662	46340912	[20.38877, 8.55]	400	+	46341187	NSUN4	ENST00000537428.2	610	+	46340177	NSUN4	ENST00000474844.5	1049	+	46341836	NSUN4	ENST00000498008.5
H929	17169	chr7	133035316	5.48	11	PROMOTER	27.1985	chr7:133035191-133035441	chr7	133035191	133035441	[27.19854, 9.53]	401	-	133034915	MIR3654	ENST00000639535.1
H929	9896	chr4	140372952	0	0	PROMOTER	7.97	chr4:140372827-140373077	chr4	140372827	140373077	[7.97]	402	-	140373354	RP11-425I13.3	ENST00000609616.1	408	-	140373360	RP11-425I13.3	ENST00000512692.6	522	+	140373474	SCOC	ENST00000512749.5	558	+	140373510	SCOC	ENST00000614192.4:ENST00000608372.5	584	+	140373536	SCOC	ENST00000506597.1	691	+	140373643	SCOC	ENST00000394201.8	697	+	140373649	SCOC	ENST00000510586.5
H929	1744	chr1	159077304	10.49	21	PROMOTER	29.4191	chr1:159077179-159077429	chr1	159077179	159077429	[18.53, 29.41907]	403	-	159076901	AIM2	ENST00000368130.8
H929	11870	chr5	81852004	0	1	PROMOTER	12.3577	chr5:81851879-81852129	chr5	81851879	81852129	[10.08, 12.35767]	403	+	81851601	CTD-2249K22.1	ENST00000512859.1
H929	1029	chr1	112619821	0	0	PROMOTER	8.41318	chr1:112619696-112619946	chr1	112619696	112619946	[8.41318]	403	-	112619418	ST7L	ENST00000358039.8	632	-	112619189	ST7L	ENST00000360743.8:ENST00000490067.5:ENST00000343210.11:ENST00000369666.5	648	+	112619173	CAPZA1	ENST00000263168.3	893	-	112618928	ST7L	ENST00000369669.5
H929	6502	chr3	9987523	0	0	PROMOTER	7.6212	chr3:9987398-9987648	chr3	9987398	9987648	[7.6212]	403	-	9987120	EMC3	ENST00000245046.6	841	-	9986682	EMC3	ENST00000429759.5
H929	18619	chr8	77001350	0	0	PROMOTER	5.59729	chr8:77001225-77001475	chr8	77001225	77001475	[5.59729]	403	-	77000947	PEX2	ENST00000520103.5	1083	-	77000267	PEX2	ENST00000522527.5	1124	-	77000226	PEX2	ENST00000357039.8
H929	16390	chr7	43649892	8	16	PROMOTER	61.6821	chr7:43649767-43650017	chr7	43649767	43650017	[61.68211, 26.29]	404	-	43650296	COA1	ENST00000395879.5	1278	-	43648614	COA1	ENST00000640232.1
H929	27181	chr15	65305081	7	14	PROMOTER	43.0312	chr15:65304956-65305206	chr15	65304956	65305206	[24.02, 43.03122]	404	+	65304677	RNU5B-1	ENST00000363286.1
H929	30511	chr19	4769685	39.29	93	PROMOTER	26.296	chr19:4769560-4769810	chr19	4769560	4769810	[11.15, 26.29596, 6.15]	404	+	4769281	MIR7-3HG	ENST00000588758.5	985	+	4770670	MIR7-3	ENST00000384898.1
H929	5025	chr2	121531285	0	0	PROMOTER	6.47447	chr2:121531160-121531410	chr2	121531160	121531410	[6.47447]	404	+	121530881	RNU4ATAC	ENST00000580972.1	863	+	121530422	RP11-204L24.2	ENST00000577914.1
H929	20164	chr9	69759537	0	0	PROMOTER	5.00919	chr9:69759412-69759662	chr9	69759412	69759662	[5.00919]	404	-	69759941	PTAR1	ENST00000377200.9	405	-	69759942	PTAR1	ENST00000340434.4	422	-	69759959	PTAR1	ENST00000472967.2
H929	28816	chr17	36090546	0	0	PROMOTER	15.19	chr17:36090421-36090671	chr17	36090421	36090671	[15.19]	405	-	36090141	CCL3	ENST00000613922.1
H929	32437	chr22	41091381	0	0	PROMOTER	5.66264	chr22:41091256-41091506	chr22	41091256	41091506	[5.66264]	405	+	41091786	EP300	ENST00000263253.8	1132	+	41092513	MIR1281	ENST00000408233.1
H929	21711	chr10	89332890	0	0	PROMOTER	11.095	chr10:89332765-89333015	chr10	89332765	89333015	[11.09498]	406	+	89332484	IFIT3	ENST00000371811.4
H929	19618	chr8	127890220	8	16	PROMOTER	10.7161	chr8:127890095-127890345	chr8	127890095	127890345	[4.09, 10.71606]	406	+	127890626	RF02166	ENST00000620853.1	408	+	127890628	PVT1	ENST00000513868.6
H929	5059	chr2	127526875	0	0	PROMOTER	11.3223	chr2:127526750-127527000	chr2	127526750	127527000	[11.32227]	407	-	127526468	IWS1	ENST00000295321.8
H929	18920	chr8	95268428	0	0	PROMOTER	5.06863	chr8:95268303-95268553	chr8	95268303	95268553	[5.06863]	408	+	95268836	KB-1047C11.2	ENST00000521905.1	773	-	95269201	C8orf37	ENST00000286688.5
H929	125	chr1	11908561	5	10	PROMOTER	25.938	chr1:11908436-11908686	chr1	11908436	11908686	[25.93798, 16.06]	409	+	11908152	RNU5E-1	ENST00000362477.1	1366	-	11909927	RNU5E-4P	ENST00000364931.1
H929	567	chr1	44730761	2	4	PROMOTER	24.7537	chr1:44730636-44730886	chr1	44730636	44730886	[15.08, 24.75366]	409	-	44731170	RNU5D-1	ENST00000363299.1
H929	7064	chr3	56916062	0	0	PROMOTER	9.22244	chr3:56915937-56916187	chr3	56915937	56916187	[9.22244]	409	-	56916471	ARHGEF3	ENST00000496106.5
H929	1830	chr1	160796596	0	0	PROMOTER	6.43	chr1:160796471-160796721	chr1	160796471	160796721	[6.43]	409	+	160796187	LY9	ENST00000368039.2	438	+	160796158	LY9	ENST00000263285.10	484	+	160796112	LY9	ENST00000392203.8	522	+	160796074	LY9	ENST00000368037.9
[truncated: 15,641 more rows]
[truncated: 118 more columns]

## Sheet: U266
Set	Peak_Group_ID	Chromosome	Avg_Peak_Centre	SD_Peak_Centre	Peaks_Centre_T_dist	PromoterStatus	Max_LogVal	ForUCSC	Chromosome	Start	End	PeakScores->	absDist	Strand	TSS	Gene	EnsemblCode	absDist	Strand	TSS	Gene	EnsemblCode	absDist	Strand	TSS	Gene	EnsemblCode	absDist	Strand	TSS	Gene	EnsemblCode	absDist	Strand	TSS	Gene	EnsemblCode	absDist	Strand	TSS	Gene	EnsemblCode	absDist	Strand	TSS	Gene	EnsemblCode	absDist	Strand
[truncated: 12,825 more rows]
[truncated: 118 more columns]

[truncated: 18 more sheets: OCILY3_1, OCILY3_2, OCILY10_1, OCILY10_2, MM_Combined, OCILY_Combined, BLIMP1, CTCF, D3.IRF4, D6.IRF4, H3K4me3, H3K27ac, XBP1, BLIMP1_D3.IRF4, BLIMP1_D6.IRF4, BLIMP1_D3.IRF4_XBP1, BLIMP1_D6.IRF4_XBP1, BLIMP1_D3.IRF4_D6.IRF4_XBP1]
